# Supplementary material for: Parallel profiling of genome mutations and multiple chromatin modalities in single cells by scNanoCT&amp;ATAC-seq
Source: Research Square preprint supplement (doi:10.21203/rs.3.rs-8125184/v1), 2026-01-13
Supplement: Supplementary file 1 [file 21c0b541d0289f4bb3a0bd50.xlsx]

## Sheet: scNanoCT&ATAC-seq
Table S1. Quality control of scNanoCT&ATAC-seq data of individual cells of two human cell lines.
Technique	Modality I5	Modality I7	Cell ID	Data size (bp)	Barcoded reads	Avg. read length (bp)	Reads with adapters	Mapped reads	Unique reads	Mapping ratio (%)	Coverage	I5 fragments	I5 FRIP	I5 TSS	I7 fragments	I7 FRIP	I7 TSS
scNanoCT&ATAC-seq	H3K27me3	ATAC	GM12878-H3K27me3-1#1_1	29002386	11589	2502.6	11450	11112	9839	97.048	0.827111	8190	2818	2.385	10094	941	2.695
scNanoCT&ATAC-seq	H3K27me3	ATAC	GM12878-H3K27me3-1#1_10	266983964	67100	3978.9	66799	65302	53987	97.7589	8.03127	45680	16560	2.63	55911	4136	3.372
scNanoCT&ATAC-seq	H3K27me3	ATAC	GM12878-H3K27me3-1#1_11	247527371	63272	3912.1	62915	61974	51584	98.5043	7.49604	60456	23116	1.974	36164	2935	3.655
scNanoCT&ATAC-seq	H3K27me3	ATAC	GM12878-H3K27me3-1#1_12	119546757	38273	3123.5	38066	37493	31814	98.4947	3.56033	29061	9964	2.189	30593	2064	3.228
scNanoCT&ATAC-seq	H3K27me3	ATAC	GM12878-H3K27me3-1#1_2	84467897	31360	2693.5	31123	30521	25743	98.0657	2.45205	25483	9011	1.731	22734	1572	3.657
scNanoCT&ATAC-seq	H3K27me3	ATAC	GM12878-H3K27me3-1#1_5	54773562	20735	2641.6	20633	20287	17813	98.3231	1.59309	17651	6988	1.82	15891	1269	2.979
scNanoCT&ATAC-seq	H3K27me3	ATAC	GM12878-H3K27me3-1#1_6	149499545	53676	2785.2	51854	50731	40942	97.8343	4.35813	44483	15987	1.593	32422	2160	3.423
scNanoCT&ATAC-seq	H3K27me3	ATAC	GM12878-H3K27me3-1#1_7	126022157	50533	2493.9	49928	49083	39747	98.3076	3.63468	39719	14971	1.476	34995	2739	2.852
scNanoCT&ATAC-seq	H3K27me3	ATAC	GM12878-H3K27me3-1#1_8	6591171	3355	1964.6	3291	3226	3139	98.0249	0.17344	2821	906	1.76	2857	190	2.074
scNanoCT&ATAC-seq	H3K27me3	ATAC	GM12878-H3K27me3-1#1_9	208842222	99018	2109.1	58260	55991	46903	96.1054	5.73899	51429	19398	2.611	35787	3314	3.05
scNanoCT&ATAC-seq	H3K27me3	ATAC	GM12878-H3K27me3-1#2_1	350250918	99765	3510.8	99276	97723	81309	98.4357	10.506	89167	37857	1.609	63205	5069	3.48
scNanoCT&ATAC-seq	H3K27me3	ATAC	GM12878-H3K27me3-1#2_10	642365922	159909	4017.1	159397	157007	125261	98.5006	19.4886	138272	55231	1.695	98543	9686	3.03
scNanoCT&ATAC-seq	H3K27me3	ATAC	GM12878-H3K27me3-1#2_11	505150833	132231	3820.2	131660	129199	102761	98.1308	15.1982	108881	48458	1.995	82035	7655	3.835
scNanoCT&ATAC-seq	H3K27me3	ATAC	GM12878-H3K27me3-1#2_12	234198054	61863	3785.8	61609	60642	48461	98.4304	7.04511	47027	17436	2.365	44737	3371	3.607
scNanoCT&ATAC-seq	H3K27me3	ATAC	GM12878-H3K27me3-1#2_2	307085377	84842	3619.5	84445	83094	65565	98.4001	9.18876	55911	17493	2.359	66507	5289	3.323
scNanoCT&ATAC-seq	H3K27me3	ATAC	GM12878-H3K27me3-1#2_3	155169371	57119	2716.6	56819	55807	48008	98.2189	4.52455	49202	19519	1.646	39827	3451	2.698
scNanoCT&ATAC-seq	H3K27me3	ATAC	GM12878-H3K27me3-1#2_4	283567685	84787	3344.5	84459	83134	69976	98.4312	8.474	73166	24515	1.769	58826	3584	3.012
scNanoCT&ATAC-seq	H3K27me3	ATAC	GM12878-H3K27me3-1#2_5	233516400	59940	3895.8	59697	58791	48466	98.4823	7.03605	51558	20949	1.797	39978	3813	4.566
scNanoCT&ATAC-seq	H3K27me3	ATAC	GM12878-H3K27me3-1#2_6	613948601	174818	3511.9	173630	170014	128506	97.9174	18.3006	108856	33523	2.082	131632	11272	3.299
scNanoCT&ATAC-seq	H3K27me3	ATAC	GM12878-H3K27me3-1#2_7	509826320	142429	3579.5	141735	139636	105647	98.5191	15.3165	95239	26123	1.88	102357	5510	3.093
scNanoCT&ATAC-seq	H3K27me3	ATAC	GM12878-H3K27me3-1#2_8	420539488	105756	3976.5	105250	103551	82869	98.3857	12.7117	95128	38558	2.288	57401	7133	4.867
scNanoCT&ATAC-seq	H3K27me3	ATAC	GM12878-H3K27me3-1#2_9	265897934	87761	3029.8	71344	69676	54511	97.662	7.73685	51063	17728	2.604	51214	4223	3.73
scNanoCT&ATAC-seq	H3K27me3	ATAC	GM12878-H3K27me3-1#3_1	534693989	158368	3376.3	157517	154281	127198	97.9456	15.9024	148127	38893	1.98	92089	4302	3.077
scNanoCT&ATAC-seq	H3K27me3	ATAC	GM12878-H3K27me3-1#3_10	510679519	131729	3876.7	122591	120431	96978	98.238	15.3219	99439	38697	2.127	82387	7302	3.962
scNanoCT&ATAC-seq	H3K27me3	ATAC	GM12878-H3K27me3-1#3_11	384642543	101777	3779.3	101075	99312	79611	98.2558	11.5698	75665	28342	2.256	72543	6502	4.006
scNanoCT&ATAC-seq	H3K27me3	ATAC	GM12878-H3K27me3-1#3_12	320772733	81152	3952.7	80759	79170	63719	98.0324	9.66147	60749	22852	2.279	57830	5557	4.112
scNanoCT&ATAC-seq	H3K27me3	ATAC	GM12878-H3K27me3-1#3_2	556124140	140654	3953.8	139622	137613	111822	98.5611	16.8039	135854	53020	1.853	74433	6247	3.522
scNanoCT&ATAC-seq	H3K27me3	ATAC	GM12878-H3K27me3-1#3_3	124023449	41655	2977.4	41348	40654	34987	98.3216	3.63925	34849	13560	1.768	29571	2437	3.685
scNanoCT&ATAC-seq	H3K27me3	ATAC	GM12878-H3K27me3-1#3_4	183176262	51351	3567.1	51093	50302	42414	98.4518	5.48594	40815	15818	1.856	38053	3550	3.596
scNanoCT&ATAC-seq	H3K27me3	ATAC	GM12878-H3K27me3-1#3_5	305251250	79550	3837.2	79210	77884	64860	98.326	9.20019	71778	29468	2.017	50329	4481	4.778
scNanoCT&ATAC-seq	H3K27me3	ATAC	GM12878-H3K27me3-1#3_6	393270330	102479	3837.6	101664	100005	78792	98.3682	11.8237	89623	35858	1.879	58670	5117	4.076
scNanoCT&ATAC-seq	H3K27me3	ATAC	GM12878-H3K27me3-1#3_7	379100557	95839	3955.6	94534	93310	73889	98.7052	11.4244	80857	28515	1.932	57323	3687	3.842
scNanoCT&ATAC-seq	H3K27me3	ATAC	GM12878-H3K27me3-1#3_8	307463363	77596	3962.4	77157	75970	60880	98.4616	9.28556	63152	25757	1.962	50488	4595	4.166
scNanoCT&ATAC-seq	H3K27me3	ATAC	GM12878-H3K27me3-1#3_9	345434230	90799	3804.4	88138	86583	70214	98.2357	10.3704	79784	31134	2.442	51011	4264	3.4
scNanoCT&ATAC-seq	H3K27me3	ATAC	GM12878-H3K27me3-1#4_1	179702295	52538	3420.4	52227	51437	44037	98.4874	5.37695	46385	18444	2.326	35838	3452	4.158
scNanoCT&ATAC-seq	H3K27me3	ATAC	GM12878-H3K27me3-1#4_10	405771920	98480	4120.3	97892	95937	79025	98.0029	12.2544	86068	34161	1.771	64218	5461	4.082
scNanoCT&ATAC-seq	H3K27me3	ATAC	GM12878-H3K27me3-1#4_11	316501648	89035	3554.8	88650	86791	70355	97.903	9.45731	58950	17868	2.154	73971	4468	3.832
scNanoCT&ATAC-seq	H3K27me3	ATAC	GM12878-H3K27me3-1#4_12	359194908	88665	4051.1	88331	86774	71683	98.2373	10.8937	70774	24450	2.275	63700	6338	4.337
scNanoCT&ATAC-seq	H3K27me3	ATAC	GM12878-H3K27me3-1#4_2	257279506	71238	3611.5	70847	69602	57191	98.2427	7.70562	52539	17644	1.928	54833	3444	3.439
scNanoCT&ATAC-seq	H3K27me3	ATAC	GM12878-H3K27me3-1#4_3	113849678	38511	2956.3	38258	37592	32733	98.2592	3.35119	35827	13961	1.466	25261	1901	3.562
scNanoCT&ATAC-seq	H3K27me3	ATAC	GM12878-H3K27me3-1#4_4	157163234	45978	3418.2	45822	44924	38444	98.0402	4.68055	33577	10861	2.593	37861	2825	3.678
scNanoCT&ATAC-seq	H3K27me3	ATAC	GM12878-H3K27me3-1#4_5	217584109	58581	3714.2	58307	57225	48693	98.1443	6.5279	51290	21041	1.814	39776	3600	3.717
scNanoCT&ATAC-seq	H3K27me3	ATAC	GM12878-H3K27me3-1#4_6	364285919	97533	3735	96755	95134	76009	98.3246	10.9429	74625	29281	2.016	67824	6811	3.515
scNanoCT&ATAC-seq	H3K27me3	ATAC	GM12878-H3K27me3-1#4_7	554234396	146248	3789.7	144857	142493	113737	98.368	16.6943	126973	49788	1.665	86989	6721	3.374
scNanoCT&ATAC-seq	H3K27me3	ATAC	GM12878-H3K27me3-1#4_8	205753056	56366	3650.3	56074	54994	45355	98.074	6.16094	40350	14150	2.469	43811	3367	3.803
scNanoCT&ATAC-seq	H3K27me3	ATAC	GM12878-H3K27me3-1#4_9	234674147	76627	3062.6	60237	58777	48457	97.5762	6.82309	56576	22413	1.937	34103	2959	3.956
scNanoCT&ATAC-seq	H3K27me3	ATAC	GM12878-H3K27me3-1#5_1	260494697	79146	3291.3	78666	77197	66173	98.1326	7.73242	78422	30885	1.611	46045	3251	3.26
scNanoCT&ATAC-seq	H3K27me3	ATAC	GM12878-H3K27me3-1#5_10	10016375	2816	3557	2756	2701	2700	98.0044	0.264114	2589	977	1.714	2574	219	2.503
scNanoCT&ATAC-seq	H3K27me3	ATAC	GM12878-H3K27me3-1#5_11	9764431	3009	3245.1	2943	2885	2882	98.0292	0.256831	2780	954	2.178	2744	204	3.265
scNanoCT&ATAC-seq	H3K27me3	ATAC	GM12878-H3K27me3-1#5_12	10314053	3332	3095.5	3250	3175	3170	97.6923	0.275941	2955	1073	1.155	2963	234	3.859
scNanoCT&ATAC-seq	H3K27me3	ATAC	GM12878-H3K27me3-1#5_2	426625444	114134	3737.9	113424	111752	90960	98.5259	12.8267	97899	37135	2.134	73601	6194	3.34
scNanoCT&ATAC-seq	H3K27me3	ATAC	GM12878-H3K27me3-1#5_3	81282234	30590	2657.2	30380	29800	25892	98.0908	2.3538	23627	8704	1.924	24141	2207	2.718
scNanoCT&ATAC-seq	H3K27me3	ATAC	GM12878-H3K27me3-1#5_4	167647594	51765	3238.6	51559	50768	44198	98.4658	4.99553	46334	20661	1.802	36258	3264	3.655
scNanoCT&ATAC-seq	H3K27me3	ATAC	GM12878-H3K27me3-1#5_5	193815317	51105	3792.5	50895	49868	42012	97.9821	5.81226	49393	20807	2.463	28878	2226	4.372
scNanoCT&ATAC-seq	H3K27me3	ATAC	GM12878-H3K27me3-1#5_6	323818189	90702	3570.1	90211	88563	69689	98.1732	9.66838	64626	22934	2.795	66531	5816	3.516
scNanoCT&ATAC-seq	H3K27me3	ATAC	GM12878-H3K27me3-1#5_7	755179502	204432	3694	203211	200216	158537	98.5262	22.7293	188981	65431	1.71	104613	7779	3.676
scNanoCT&ATAC-seq	H3K27me3	ATAC	GM12878-H3K27me3-1#5_8	295449601	79482	3717.2	79060	77688	63591	98.2646	8.86534	66869	27739	1.908	51227	4658	3.866
scNanoCT&ATAC-seq	H3K27me3	ATAC	GM12878-H3K27me3-1#5_9	13118352	4823	2720	4643	4503	4452	96.9847	0.339126	4539	1543	3.63	3624	264	2.11
scNanoCT&ATAC-seq	H3K27me3	ATAC	GM12878-H3K27me3-1#6_1	150289358	44287	3393.5	44043	43126	35912	97.9179	4.46018	32269	12028	2.538	34918	3210	3.325
scNanoCT&ATAC-seq	H3K27me3	ATAC	GM12878-H3K27me3-1#6_2	247099337	64300	3842.9	63921	62433	50605	97.6721	7.39568	47135	16829	2.614	47746	3564	4.317
scNanoCT&ATAC-seq	H3K27me3	ATAC	GM12878-H3K27me3-1#6_3	108359830	37022	2926.9	36777	36036	31578	97.9852	3.17518	34140	14486	1.784	24750	2137	3.368
scNanoCT&ATAC-seq	H3K27me3	ATAC	GM12878-H3K27me3-1#6_4	155941013	46642	3343.4	46427	45596	38941	98.2101	4.64338	37478	11438	1.733	35147	2091	2.499
scNanoCT&ATAC-seq	H3K27me3	ATAC	GM12878-H3K27me3-1#6_5	148721272	38111	3902.3	37951	37150	30637	97.8894	4.45967	19003	6829	2.213	37770	4329	4.305
scNanoCT&ATAC-seq	H3K27me3	ATAC	GM12878-H3K27me3-1#6_6	383854828	103025	3725.8	102423	100634	80358	98.2533	11.5314	80051	29305	2.196	69294	4977	3.797
scNanoCT&ATAC-seq	H3K27me3	ATAC	GM12878-H3K27me3-1#6_7	400842665	103328	3879.3	102684	101095	80628	98.4525	12.0916	81835	33682	2.126	69004	6208	4.3
scNanoCT&ATAC-seq	H3K27me3	ATAC	GM12878-H3K27me3-1#6_8	417365652	105249	3965.5	104782	103213	84452	98.5026	12.6522	93006	34852	1.997	64339	5766	3.809
scNanoCT&ATAC-seq	H3K27me3	ATAC	GM12878-H3K27me3-1#7_1	162901491	51553	3159.9	51249	50297	42721	98.1424	4.80231	43957	16752	2.21	37145	3385	3.48
scNanoCT&ATAC-seq	H3K27me3	ATAC	GM12878-H3K27me3-1#7_10	14187242	4705	3015.4	4618	4471	4465	96.8168	0.360525	4188	964	2.032	4498	170	3.388
scNanoCT&ATAC-seq	H3K27me3	ATAC	GM12878-H3K27me3-1#7_11	13506453	4979	2712.7	4905	4749	4741	96.8196	0.355254	4412	1046	2.263	4906	153	2.587
scNanoCT&ATAC-seq	H3K27me3	ATAC	GM12878-H3K27me3-1#7_12	12639295	4790	2638.7	4701	4536	4530	96.4901	0.330091	4113	1015	2.09	4607	171	1.683
scNanoCT&ATAC-seq	H3K27me3	ATAC	GM12878-H3K27me3-1#7_2	205454925	57135	3596	56799	55548	46465	97.7975	6.09488	49312	20749	1.995	38194	3450	4.811
scNanoCT&ATAC-seq	H3K27me3	ATAC	GM12878-H3K27me3-1#7_3	51553864	22739	2267.2	22572	21922	19209	97.1203	1.43999	14767	3607	2.558	20538	876	3.102
scNanoCT&ATAC-seq	H3K27me3	ATAC	GM12878-H3K27me3-1#7_4	204932627	64214	3191.4	63949	62648	54445	97.9656	6.0733	61586	24326	1.704	40298	3091	3.2
scNanoCT&ATAC-seq	H3K27me3	ATAC	GM12878-H3K27me3-1#7_6	311949431	90167	3459.7	89695	88271	70017	98.4124	9.31162	72534	26549	1.795	59568	4373	3.162
scNanoCT&ATAC-seq	H3K27me3	ATAC	GM12878-H3K27me3-1#7_7	261135701	70066	3727	69492	68349	55272	98.3552	7.79743	62441	24658	1.801	41681	3678	3.75
scNanoCT&ATAC-seq	H3K27me3	ATAC	GM12878-H3K27me3-1#7_8	318107010	86913	3660.1	86501	85232	70188	98.533	9.5615	79236	34586	1.792	51479	4876	3.936
scNanoCT&ATAC-seq	H3K27me3	ATAC	GM12878-H3K27me3-1#7_9	12233828	4001	3057.7	3847	3715	3711	96.5688	0.303878	3749	1017	1.421	3405	147	2.437
scNanoCT&ATAC-seq	H3K27me3	ATAC	GM12878-H3K27me3-1#8_12	11081367	5314	2085.3	5247	5140	4997	97.9607	0.302469	4564	1442	2.338	4894	299	3.226
scNanoCT&ATAC-seq	H3K27me3	ATAC	GM12878-H3K27me3-1#8_2	306150876	83200	3679.7	82685	81467	68666	98.5269	9.21302	71345	25091	2.295	58120	4148	4.29
scNanoCT&ATAC-seq	H3K27me3	ATAC	GM12878-H3K27me3-1#8_3	88443810	35594	2484.8	35424	34574	30102	97.6005	2.54949	26540	7913	1.539	30056	1832	3.184
scNanoCT&ATAC-seq	H3K27me3	ATAC	GM12878-H3K27me3-1#8_4	145838411	45492	3205.8	45274	44554	39195	98.4097	4.34334	41617	16273	1.984	31512	2474	3.486
scNanoCT&ATAC-seq	H3K27me3	ATAC	GM12878-H3K27me3-1#8_5	179204081	49629	3610.9	49440	48714	41770	98.5316	5.4049	43680	16203	2.071	35911	2587	3.002
scNanoCT&ATAC-seq	H3K27me3	ATAC	GM12878-H3K27me3-1#8_6	434983345	116685	3727.8	116083	114351	94098	98.508	13.1254	112995	41681	2.208	64291	5829	4.298
scNanoCT&ATAC-seq	H3K27me3	ATAC	GM12878-H3K27me3-1#8_7	340054042	89225	3811.2	88702	87294	71815	98.4127	10.2544	79007	31926	1.782	55327	5043	3.905
scNanoCT&ATAC-seq	H3K27me3	ATAC	GM12878-H3K27me3-1#8_8	159340600	42357	3761.8	42163	41434	34882	98.271	4.79585	33596	14156	2.053	31877	3128	3.733
scNanoCT&ATAC-seq	H3K27me3	ATAC	GM12878-H3K27me3-2#33_1	141586308	43165	3280.1	42925	42101	38635	98.0804	4.19541	38033	13677	3.225	35031	3367	3.682
scNanoCT&ATAC-seq	H3K27me3	ATAC	GM12878-H3K27me3-2#33_10	172887245	44092	3921.1	43918	43099	39119	98.1352	5.20322	40964	16989	2.304	32781	3784	5.237
scNanoCT&ATAC-seq	H3K27me3	ATAC	GM12878-H3K27me3-2#33_11	153491426	43777	3506.2	43517	42764	39101	98.2696	4.58357	48960	21090	2.467	24733	2547	4.615
scNanoCT&ATAC-seq	H3K27me3	ATAC	GM12878-H3K27me3-2#33_12	165803286	47921	3459.9	47730	46915	42897	98.2925	4.96133	46182	16496	2.762	35362	3210	4.078
scNanoCT&ATAC-seq	H3K27me3	ATAC	GM12878-H3K27me3-2#33_2	266905664	71440	3736.1	71094	69606	62992	97.907	7.9924	63633	28306	2.531	53843	6130	4.524
scNanoCT&ATAC-seq	H3K27me3	ATAC	GM12878-H3K27me3-2#33_3	31940367	13537	2359.5	13435	13131	12526	97.7373	0.906141	10911	3551	2.774	12469	835	3.712
scNanoCT&ATAC-seq	H3K27me3	ATAC	GM12878-H3K27me3-2#33_4	168846013	45879	3680.2	45673	44976	41627	98.4739	5.0802	48592	19959	2.734	29565	3070	4.655
scNanoCT&ATAC-seq	H3K27me3	ATAC	GM12878-H3K27me3-2#33_5	230593619	58427	3946.7	58200	57222	52370	98.3196	6.97261	64722	25371	2.351	34457	3483	4.815
scNanoCT&ATAC-seq	H3K27me3	ATAC	GM12878-H3K27me3-2#33_6	232755734	63231	3681	62829	61799	55987	98.3606	6.97636	67368	28738	1.989	38562	3822	4.652
scNanoCT&ATAC-seq	H3K27me3	ATAC	GM12878-H3K27me3-2#33_7	371384009	99508	3732.2	98895	97142	88096	98.2274	11.1448	100294	44648	2.511	66103	7330	5.092
scNanoCT&ATAC-seq	H3K27me3	ATAC	GM12878-H3K27me3-2#33_8	241588874	64074	3770.5	63743	62639	56896	98.268	7.27307	70111	28928	2.197	37318	3344	4.955
scNanoCT&ATAC-seq	H3K27me3	ATAC	GM12878-H3K27me3-2#33_9	231592668	61260	3780.5	60802	59657	53552	98.1168	6.94032	56039	20251	3.03	43855	4615	5.395
scNanoCT&ATAC-seq	H3K27me3	ATAC	GM12878-H3K27me3-2#34_1	156687439	42091	3722.6	41792	41123	37122	98.3992	4.69646	41266	18219	2.528	28211	2654	5.563
scNanoCT&ATAC-seq	H3K27me3	ATAC	GM12878-H3K27me3-2#34_10	286671768	70888	4044	70552	69398	61720	98.3643	8.67616	64421	25390	3.008	52341	5102	5.207
scNanoCT&ATAC-seq	H3K27me3	ATAC	GM12878-H3K27me3-2#34_11	164137388	43078	3810.2	42733	41752	36763	97.7044	4.88063	37558	16240	2.714	30932	2972	5.121
scNanoCT&ATAC-seq	H3K27me3	ATAC	GM12878-H3K27me3-2#34_12	276085450	73950	3733.4	73571	72031	64751	97.9068	8.26208	74452	31016	2.902	46664	4548	5.731
scNanoCT&ATAC-seq	H3K27me3	ATAC	GM12878-H3K27me3-2#34_2	309113096	78590	3933.2	78106	76744	68274	98.2562	9.3146	67573	25647	3.137	60247	6277	5.146
scNanoCT&ATAC-seq	H3K27me3	ATAC	GM12878-H3K27me3-2#34_3	62965111	23155	2719.3	22964	22539	21037	98.1493	1.82761	21848	8916	2.777	17542	1629	3.946
scNanoCT&ATAC-seq	H3K27me3	ATAC	GM12878-H3K27me3-2#34_4	188335436	48656	3870.8	48394	47604	43371	98.3676	5.68266	49057	20381	2.792	32233	3028	5.431
scNanoCT&ATAC-seq	H3K27me3	ATAC	GM12878-H3K27me3-2#34_5	364941203	88664	4116	88280	86689	77174	98.1978	11.0473	88707	38746	2.328	57067	6204	5.039
scNanoCT&ATAC-seq	H3K27me3	ATAC	GM12878-H3K27me3-2#34_6	276298261	74398	3713.8	73928	72452	63050	98.0035	8.24734	59140	21289	2.882	59311	5436	4.907
scNanoCT&ATAC-seq	H3K27me3	ATAC	GM12878-H3K27me3-2#34_7	293534983	75810	3872	75241	73848	65212	98.1486	8.80039	61906	24511	3.796	59313	6383	5.676
scNanoCT&ATAC-seq	H3K27me3	ATAC	GM12878-H3K27me3-2#34_8	251998452	66568	3785.6	66226	65077	57881	98.265	7.58279	63420	25151	2.32	44679	4195	4.833
scNanoCT&ATAC-seq	H3K27me3	ATAC	GM12878-H3K27me3-2#34_9	257520642	65251	3946.6	64731	63541	55959	98.1616	7.73559	62855	28867	3.231	42650	4511	4.146
scNanoCT&ATAC-seq	H3K27me3	ATAC	GM12878-H3K27me3-2#35_1	250485972	62944	3979.5	62444	61180	54035	97.9758	7.53309	47561	15978	3.51	53520	4793	5.588
scNanoCT&ATAC-seq	H3K27me3	ATAC	GM12878-H3K27me3-2#35_10	450978117	98015	4601.1	97501	95762	83771	98.2164	13.717	97382	43260	2.714	60372	7051	5.506
scNanoCT&ATAC-seq	H3K27me3	ATAC	GM12878-H3K27me3-2#35_11	449592428	105248	4271.7	104466	102459	88467	98.0788	13.6065	101161	41609	2.765	65036	7872	5.264
scNanoCT&ATAC-seq	H3K27me3	ATAC	GM12878-H3K27me3-2#35_12	572408059	128998	4437.3	128309	126147	110430	98.315	17.4326	135809	52767	2.782	71738	7668	5.392
scNanoCT&ATAC-seq	H3K27me3	ATAC	GM12878-H3K27me3-2#35_2	375494908	84561	4440.5	83898	82335	72266	98.137	11.351	90144	38931	2.64	45360	4344	4.959
scNanoCT&ATAC-seq	H3K27me3	ATAC	GM12878-H3K27me3-2#35_3	103943014	32673	3181.3	32393	31778	29354	98.1014	3.05788	34027	15172	2.38	20503	2093	4.91
scNanoCT&ATAC-seq	H3K27me3	ATAC	GM12878-H3K27me3-2#35_4	231623635	53395	4337.9	53089	52141	46608	98.2143	7.03158	45871	18493	2.459	41103	4216	6.063
scNanoCT&ATAC-seq	H3K27me3	ATAC	GM12878-H3K27me3-2#35_5	307142556	72180	4255.2	71796	70234	61843	97.8244	9.28373	59265	21273	2.777	57766	4116	5.932
scNanoCT&ATAC-seq	H3K27me3	ATAC	GM12878-H3K27me3-2#35_6	432000066	106206	4067.6	102650	100473	86180	97.8792	13.0135	80501	28990	2.822	81072	7221	4.948
scNanoCT&ATAC-seq	H3K27me3	ATAC	GM12878-H3K27me3-2#35_7	480917191	111812	4301.1	110664	108858	95530	98.368	14.5661	112837	46830	2.618	65773	6583	5.872
scNanoCT&ATAC-seq	H3K27me3	ATAC	GM12878-H3K27me3-2#35_8	430808836	100216	4298.8	99623	97788	85069	98.1581	13.0615	99263	39919	2.701	60108	5562	4.888
scNanoCT&ATAC-seq	H3K27me3	ATAC	GM12878-H3K27me3-2#35_9	245868418	59905	4104.3	57451	56481	48859	98.3116	7.38498	49298	17355	3.109	42378	3998	5.781
scNanoCT&ATAC-seq	H3K27me3	ATAC	GM12878-H3K27me3-2#36_1	27007062	8427	3204.8	8274	8130	7958	98.2596	0.775038	8764	3829	2.13	6094	644	5.265
scNanoCT&ATAC-seq	H3K27me3	ATAC	GM12878-H3K27me3-2#36_10	388145622	86588	4482.7	86091	84576	74321	98.2402	11.8078	90502	41380	2.234	48697	5048	5.594
scNanoCT&ATAC-seq	H3K27me3	ATAC	GM12878-H3K27me3-2#36_11	405907663	95549	4248.2	94821	93002	79977	98.0816	12.2598	71547	25318	2.977	76579	8308	4.66
scNanoCT&ATAC-seq	H3K27me3	ATAC	GM12878-H3K27me3-2#36_12	36899686	12677	2910.8	12528	12302	11781	98.196	1.05718	9552	2610	3.272	12418	853	5.068
scNanoCT&ATAC-seq	H3K27me3	ATAC	GM12878-H3K27me3-2#36_2	339243919	77477	4378.6	76661	75190	65642	98.0812	10.2506	59763	24153	2.935	62954	6436	5.006
scNanoCT&ATAC-seq	H3K27me3	ATAC	GM12878-H3K27me3-2#36_3	111072194	35701	3111.2	35398	34774	31752	98.2372	3.27052	28869	9633	2.894	29750	2479	5.126
scNanoCT&ATAC-seq	H3K27me3	ATAC	GM12878-H3K27me3-2#36_4	426345377	97487	4373.4	96971	95239	84995	98.2139	12.9671	96273	41622	2.764	61750	6947	5.135
scNanoCT&ATAC-seq	H3K27me3	ATAC	GM12878-H3K27me3-2#36_5	478040490	103911	4600.5	103264	101720	89209	98.5048	14.624	98576	40206	2.642	67774	7136	6.045
scNanoCT&ATAC-seq	H3K27me3	ATAC	GM12878-H3K27me3-2#36_6	419322510	102591	4087.3	95429	93844	81332	98.3391	12.6135	91413	40375	2.521	60816	6537	4.743
scNanoCT&ATAC-seq	H3K27me3	ATAC	GM12878-H3K27me3-2#36_7	13664127	4036	3385.6	3378	3263	3217	96.5956	0.336778	2995	1043	3.203	2821	204	5.186
scNanoCT&ATAC-seq	H3K27me3	ATAC	GM12878-H3K27me3-2#36_8	369603973	85163	4340	84356	82725	72048	98.0665	11.2016	78832	29116	2.625	55300	5417	5.419
scNanoCT&ATAC-seq	H3K27me3	ATAC	GM12878-H3K27me3-2#36_9	375919060	85187	4412.9	84233	82848	72182	98.3558	11.396	87776	39984	2.265	46557	4904	6.478
scNanoCT&ATAC-seq	H3K27me3	ATAC	GM12878-H3K27me3-2#37_1	124291847	34953	3556	34698	33984	30792	97.9422	3.69084	30539	12743	2.31	27215	2103	4.472
scNanoCT&ATAC-seq	H3K27me3	ATAC	GM12878-H3K27me3-2#37_10	402644167	95832	4201.6	95439	93488	82972	97.9558	12.1685	92569	38690	2.024	63213	6161	4.834
scNanoCT&ATAC-seq	H3K27me3	ATAC	GM12878-H3K27me3-2#37_11	287549489	76090	3779.1	75644	74337	65435	98.2722	8.64231	72502	28884	2.902	50628	4627	5.351
scNanoCT&ATAC-seq	H3K27me3	ATAC	GM12878-H3K27me3-2#37_12	360373524	88261	4083	87850	86389	76698	98.3369	10.9105	89368	39125	2.331	55549	5573	4.164
scNanoCT&ATAC-seq	H3K27me3	ATAC	GM12878-H3K27me3-2#37_2	562233995	136009	4133.8	135199	133077	118792	98.4305	17.0267	153595	68935	2.301	68915	7001	5.655
scNanoCT&ATAC-seq	H3K27me3	ATAC	GM12878-H3K27me3-2#37_3	35822864	13612	2631.7	13498	13246	12566	98.1331	1.02918	11350	4151	2.856	11885	1099	4.623
scNanoCT&ATAC-seq	H3K27me3	ATAC	GM12878-H3K27me3-2#37_4	176961288	43498	4068.3	43262	42541	38619	98.3334	5.3481	35960	16598	2.649	35596	4467	4.726
scNanoCT&ATAC-seq	H3K27me3	ATAC	GM12878-H3K27me3-2#37_5	240006756	57435	4178.8	57146	56187	50308	98.3218	7.26603	57955	27432	2.884	36467	4210	5.326
scNanoCT&ATAC-seq	H3K27me3	ATAC	GM12878-H3K27me3-2#37_6	26552433	6624	4008.5	5868	5718	5345	97.4438	0.750846	8670	3080	4.999	1323	157	8.581
scNanoCT&ATAC-seq	H3K27me3	ATAC	GM12878-H3K27me3-2#37_7	363203069	91094	3987.1	90342	88789	78277	98.281	10.9249	92380	39327	2.656	53525	5893	5.441
scNanoCT&ATAC-seq	H3K27me3	ATAC	GM12878-H3K27me3-2#37_8	225049057	55496	4055.2	55183	54180	47705	98.1824	6.78892	49608	22079	2.412	39333	4400	5.929
scNanoCT&ATAC-seq	H3K27me3	ATAC	GM12878-H3K27me3-2#37_9	235755534	58831	4007.3	58394	57174	50248	97.9107	7.0801	49296	18996	3.066	44337	4187	4.971
scNanoCT&ATAC-seq	H3K27me3	ATAC	GM12878-H3K27me3-2#38_10	238456192	58783	4056.6	58443	57472	51469	98.3386	7.18591	55544	25177	2.75	40805	4849	5.525
scNanoCT&ATAC-seq	H3K27me3	ATAC	GM12878-H3K27me3-2#38_11	276315662	69655	3966.9	69200	68105	59378	98.4176	8.35397	56102	22744	2.957	55126	5349	5.24
scNanoCT&ATAC-seq	H3K27me3	ATAC	GM12878-H3K27me3-2#38_12	215937494	55283	3906	54977	53924	47897	98.0847	6.49575	39788	13736	3.1	49131	5635	4.954
scNanoCT&ATAC-seq	H3K27me3	ATAC	GM12878-H3K27me3-2#38_2	250931111	60677	4135.5	60204	59124	52585	98.2061	7.56488	59653	23242	2.902	38472	3168	5.773
scNanoCT&ATAC-seq	H3K27me3	ATAC	GM12878-H3K27me3-2#38_3	67750642	23801	2846.5	23607	23166	21449	98.1319	1.9764	21936	7372	2.49	18134	1734	4.016
scNanoCT&ATAC-seq	H3K27me3	ATAC	GM12878-H3K27me3-2#38_4	141297417	35660	3962.4	35426	34857	31771	98.3938	4.25561	35434	15854	2.351	23454	2670	5.865
scNanoCT&ATAC-seq	H3K27me3	ATAC	GM12878-H3K27me3-2#38_5	166520682	39485	4217.3	39248	38331	33996	97.6636	5.00355	24688	9579	2.552	36006	1686	3.009
scNanoCT&ATAC-seq	H3K27me3	ATAC	GM12878-H3K27me3-2#38_6	369072086	90751	4066.9	90190	88911	77886	98.5819	11.183	93246	38149	2.298	53630	4728	5.804
scNanoCT&ATAC-seq	H3K27me3	ATAC	GM12878-H3K27me3-2#38_7	430012265	109148	3939.7	108026	106123	93177	98.2384	12.9471	92469	35659	3.201	81818	8203	6.312
scNanoCT&ATAC-seq	H3K27me3	ATAC	GM12878-H3K27me3-2#38_8	323433548	78447	4123	77985	76712	67961	98.3676	9.80906	81350	33510	2.287	45776	5102	5.355
scNanoCT&ATAC-seq	H3K27me3	ATAC	GM12878-H3K27me3-2#38_9	250646542	60920	4114.4	60390	59228	52097	98.0758	7.55418	56106	23525	3.046	41034	4573	5.002
scNanoCT&ATAC-seq	H3K27me3	ATAC	GM12878-H3K27me3-2#39_1	225412611	62529	3604.9	62094	60995	55327	98.2301	6.74222	58606	24058	2.541	44640	4269	4.353
scNanoCT&ATAC-seq	H3K27me3	ATAC	GM12878-H3K27me3-2#39_10	326716966	77825	4198.1	77381	76203	68017	98.4777	9.91877	81494	32418	2.91	46465	5304	4.379
scNanoCT&ATAC-seq	H3K27me3	ATAC	GM12878-H3K27me3-2#39_11	204540677	53148	3848.5	52556	51590	45466	98.162	6.13968	40418	14424	3.188	44633	5283	4.875
scNanoCT&ATAC-seq	H3K27me3	ATAC	GM12878-H3K27me3-2#39_12	168866752	51536	3276.7	51236	50290	46138	98.1536	5.005	45220	17507	2.7	41084	3613	4.867
scNanoCT&ATAC-seq	H3K27me3	ATAC	GM12878-H3K27me3-2#39_2	246479532	64898	3798	64438	63424	56817	98.4264	7.39115	68382	27797	2.488	38283	3530	4.746
scNanoCT&ATAC-seq	H3K27me3	ATAC	GM12878-H3K27me3-2#39_3	59571569	23370	2549.1	23162	22754	21407	98.2385	1.71566	19188	5449	2.177	20900	1140	4.563
scNanoCT&ATAC-seq	H3K27me3	ATAC	GM12878-H3K27me3-2#39_4	199999658	49570	4034.7	49309	48632	44416	98.627	6.07078	49602	21337	2.618	32739	3157	5.756
scNanoCT&ATAC-seq	H3K27me3	ATAC	GM12878-H3K27me3-2#39_5	164002122	46766	3506.9	46521	45018	40033	96.7692	4.81285	34762	10205	1.903	41884	1302	2.548
scNanoCT&ATAC-seq	H3K27me3	ATAC	GM12878-H3K27me3-2#39_6	320009373	85158	3757.8	84610	82770	72469	97.8253	9.5553	64338	24383	3.491	70587	7932	5.159
scNanoCT&ATAC-seq	H3K27me3	ATAC	GM12878-H3K27me3-2#39_7	254888751	68472	3722.5	67963	66523	58543	97.8812	7.58641	55599	21592	2.991	53215	4860	4.469
scNanoCT&ATAC-seq	H3K27me3	ATAC	GM12878-H3K27me3-2#39_8	325770860	83337	3909.1	82782	81072	71468	97.9343	9.8032	62217	22480	2.982	71613	6895	4.346
scNanoCT&ATAC-seq	H3K27me3	ATAC	GM12878-H3K27me3-2#39_9	207021681	54590	3792.3	52765	51743	45981	98.0631	6.18381	46530	17671	2.726	38936	3612	4.822
scNanoCT&ATAC-seq	H3K27me3	ATAC	GM12878-H3K27me3-2#40_1	14536735	4719	3080.5	4646	4541	4520	97.74	0.410199	4862	1858	2.587	3654	294	4.56
scNanoCT&ATAC-seq	H3K27me3	ATAC	GM12878-H3K27me3-2#40_10	260081871	73372	3544.7	73023	71864	65293	98.4128	7.79194	89322	31709	2.365	35032	1863	3.288
scNanoCT&ATAC-seq	H3K27me3	ATAC	GM12878-H3K27me3-2#40_11	37855196	14146	2676	14023	13783	13456	98.2885	1.08193	12408	3841	3.815	12656	949	4.25
scNanoCT&ATAC-seq	H3K27me3	ATAC	GM12878-H3K27me3-2#40_2	195583788	53861	3631.3	53476	52368	46586	97.928	5.81972	47587	17806	2.618	39868	3975	5.347
scNanoCT&ATAC-seq	H3K27me3	ATAC	GM12878-H3K27me3-2#40_3	101038707	35608	2837.5	35411	24371	22620	68.8232	2.08239	30889	12220	2.992	12916	1091	4.568
scNanoCT&ATAC-seq	H3K27me3	ATAC	GM12878-H3K27me3-2#40_4	234809679	58277	4029.2	57947	56665	50908	97.7876	7.05931	52109	22687	2.973	43019	4422	4.497
scNanoCT&ATAC-seq	H3K27me3	ATAC	GM12878-H3K27me3-2#40_5	314913540	78609	4006.1	78241	77020	68427	98.4394	9.52454	80537	33956	2.119	49250	4931	4.915
scNanoCT&ATAC-seq	H3K27me3	ATAC	GM12878-H3K27me3-2#40_6	358828548	89589	4005.3	89014	87663	76568	98.4823	10.8344	92843	40050	2.506	51435	5214	5.069
scNanoCT&ATAC-seq	H3K27me3	ATAC	GM12878-H3K27me3-2#40_8	343874707	82434	4171.5	81903	80598	70648	98.4067	10.4158	77052	31268	2.578	55108	6242	4.988
scNanoCT&ATAC-seq	H3K27me3	ATAC	GM12878-H3K27me3-3#17_1	138737910	38067	3644.6	37725	37019	34380	98.1286	4.15237	34336	13676	2.883	28942	2917	4.799
scNanoCT&ATAC-seq	H3K27me3	ATAC	GM12878-H3K27me3-3#17_10	205621344	47972	4286.3	47619	46805	43239	98.2906	6.23875	51725	24094	2.455	28666	3019	5.634
scNanoCT&ATAC-seq	H3K27me3	ATAC	GM12878-H3K27me3-3#17_11	241312247	59320	4068	58812	57701	52663	98.1109	7.2861	58672	23980	2.849	38588	3798	4.877
scNanoCT&ATAC-seq	H3K27me3	ATAC	GM12878-H3K27me3-3#17_12	290326526	71675	4050.6	71190	70023	64583	98.3607	8.80307	84307	35041	2.521	35773	3553	5.465
scNanoCT&ATAC-seq	H3K27me3	ATAC	GM12878-H3K27me3-3#17_2	231171758	56227	4111.4	55734	54640	50189	98.0371	6.97181	49579	20953	2.763	43000	4833	5.607
scNanoCT&ATAC-seq	H3K27me3	ATAC	GM12878-H3K27me3-3#17_3	37298653	14405	2589.3	14240	13949	13332	97.9565	1.07022	12877	4583	2.824	11252	876	5.077
scNanoCT&ATAC-seq	H3K27me3	ATAC	GM12878-H3K27me3-3#17_4	105287521	25856	4072.1	25638	25197	23541	98.2799	3.17822	26889	12496	2.832	16350	1980	6.034
scNanoCT&ATAC-seq	H3K27me3	ATAC	GM12878-H3K27me3-3#17_5	206637980	48832	4231.6	48528	47758	44261	98.4133	6.28091	53460	22180	2.845	28340	3098	5.516
scNanoCT&ATAC-seq	H3K27me3	ATAC	GM12878-H3K27me3-3#17_6	259208267	61667	4203.4	61135	60032	54889	98.1958	7.8431	56609	24038	2.752	45476	5212	4.851
scNanoCT&ATAC-seq	H3K27me3	ATAC	GM12878-H3K27me3-3#17_7	412335301	99722	4134.8	98782	97338	89178	98.5382	12.5123	107543	47275	2.384	56442	4590	4.56
scNanoCT&ATAC-seq	H3K27me3	ATAC	GM12878-H3K27me3-3#17_8	142590711	36002	3960.6	35734	34989	31987	97.9152	4.28351	28569	8896	2.689	30854	2153	5.186
scNanoCT&ATAC-seq	H3K27me3	ATAC	GM12878-H3K27me3-3#17_9	229309910	56631	4049.2	55962	54838	50163	97.9915	6.89392	53236	22823	2.846	39088	3956	5.282
scNanoCT&ATAC-seq	H3K27me3	ATAC	GM12878-H3K27me3-3#18_1	193858522	50384	3847.6	49908	48981	45343	98.1426	5.82289	50543	22777	2.983	33357	3805	4.608
scNanoCT&ATAC-seq	H3K27me3	ATAC	GM12878-H3K27me3-3#18_10	44320310	10515	4215	10341	9899	9180	95.7258	1.30051	4561	1361	6.931	11958	1419	5.599
scNanoCT&ATAC-seq	H3K27me3	ATAC	GM12878-H3K27me3-3#18_11	220701423	53850	4098.4	53335	52406	47819	98.2582	6.66317	54870	24819	3.472	33621	3502	6.167
scNanoCT&ATAC-seq	H3K27me3	ATAC	GM12878-H3K27me3-3#18_12	161793045	42319	3823.2	41960	41032	37457	97.7884	4.85327	34809	11684	3.307	34213	3007	6.226
scNanoCT&ATAC-seq	H3K27me3	ATAC	GM12878-H3K27me3-3#18_2	207804691	48664	4270.2	48153	47409	43627	98.4549	6.31088	45914	18528	2.967	34741	3208	6.043
scNanoCT&ATAC-seq	H3K27me3	ATAC	GM12878-H3K27me3-3#18_3	51130833	19130	2672.8	18919	18523	17553	97.9069	1.48151	16283	6126	2.046	16208	1707	3.764
scNanoCT&ATAC-seq	H3K27me3	ATAC	GM12878-H3K27me3-3#18_4	122747872	31358	3914.4	31122	30265	28169	97.2463	3.66948	25594	9346	3.011	26291	2479	5.047
scNanoCT&ATAC-seq	H3K27me3	ATAC	GM12878-H3K27me3-3#18_5	156170860	37639	4149.2	37354	36550	33691	97.8476	4.70799	34941	15538	2.414	27729	2761	5.116
scNanoCT&ATAC-seq	H3K27me3	ATAC	GM12878-H3K27me3-3#18_6	219248358	52916	4143.3	52358	51410	46787	98.1894	6.60556	48639	20325	2.798	37733	4234	5.544
scNanoCT&ATAC-seq	H3K27me3	ATAC	GM12878-H3K27me3-3#18_7	258674121	63790	4055.1	62984	61911	56267	98.2964	7.78237	62348	27339	2.65	41187	4204	5.439
scNanoCT&ATAC-seq	H3K27me3	ATAC	GM12878-H3K27me3-3#18_8	350872635	85370	4110	84714	83145	75794	98.1479	10.612	82381	33709	2.744	57813	6709	5.183
scNanoCT&ATAC-seq	H3K27me3	ATAC	GM12878-H3K27me3-3#18_9	194547858	46623	4172.8	45351	44490	40706	98.1015	5.85321	45568	20077	3.257	29870	3705	5.738
scNanoCT&ATAC-seq	H3K27me3	ATAC	GM12878-H3K27me3-3#19_1	465136525	121714	3821.6	120777	118644	108846	98.2339	14.0139	132393	57941	2.561	69490	7002	5.427
scNanoCT&ATAC-seq	H3K27me3	ATAC	GM12878-H3K27me3-3#19_10	264831507	63644	4161.1	63187	61772	56298	97.7606	7.98398	64468	27639	2.851	40060	3924	4.679
scNanoCT&ATAC-seq	H3K27me3	ATAC	GM12878-H3K27me3-3#19_11	213309049	54350	3924.7	53895	52657	47591	97.7029	6.39225	39759	14671	3.262	48505	5272	5.535
scNanoCT&ATAC-seq	H3K27me3	ATAC	GM12878-H3K27me3-3#19_12	56736269	20247	2802.2	20075	19691	18796	98.0872	1.64838	18105	7369	3.096	16815	1758	4.537
scNanoCT&ATAC-seq	H3K27me3	ATAC	GM12878-H3K27me3-3#19_2	218792386	52251	4187.3	51665	50622	46173	97.9812	6.59593	49731	22535	2.978	35074	4926	7.108
scNanoCT&ATAC-seq	H3K27me3	ATAC	GM12878-H3K27me3-3#19_3	59803909	24290	2462.1	24051	23462	22005	97.551	1.71344	19449	5595	2.841	20657	1396	4.026
scNanoCT&ATAC-seq	H3K27me3	ATAC	GM12878-H3K27me3-3#19_4	198345305	48514	4088.4	48191	47441	43931	98.4437	6.02598	55745	24003	2.624	25134	3017	5.121
scNanoCT&ATAC-seq	H3K27me3	ATAC	GM12878-H3K27me3-3#19_5	114763274	27820	4125.2	27551	26904	24698	97.6516	3.442	16582	6526	3.507	28726	3223	6.322
scNanoCT&ATAC-seq	H3K27me3	ATAC	GM12878-H3K27me3-3#19_6	329459885	82466	3995.1	81689	80063	71980	98.0095	9.90899	75633	31944	2.723	57435	6216	4.95
scNanoCT&ATAC-seq	H3K27me3	ATAC	GM12878-H3K27me3-3#19_7	292600158	79002	3703.7	77058	75746	68073	98.2974	8.76921	66374	24584	3.247	58375	4436	7.028
scNanoCT&ATAC-seq	H3K27me3	ATAC	GM12878-H3K27me3-3#19_8	273214125	64853	4212.8	64370	63221	57322	98.215	8.2939	60111	24863	3.137	45070	5206	5.152
scNanoCT&ATAC-seq	H3K27me3	ATAC	GM12878-H3K27me3-3#19_9	195559822	49087	3983.9	48487	47354	42658	97.6633	5.84215	40277	14879	3.318	38715	3398	5.194
scNanoCT&ATAC-seq	H3K27me3	ATAC	GM12878-H3K27me3-3#20_1	295791871	77827	3800.6	77217	75812	69826	98.1805	8.89019	85489	37373	2.008	44858	4119	4.78
scNanoCT&ATAC-seq	H3K27me3	ATAC	GM12878-H3K27me3-3#20_10	226767783	52217	4342.8	51903	50797	46406	97.8691	6.86313	52501	22888	3.123	33772	4270	4.704
scNanoCT&ATAC-seq	H3K27me3	ATAC	GM12878-H3K27me3-3#20_11	271395032	66979	4051.9	66492	65136	59049	97.9607	8.18117	64053	27279	3.021	45234	4987	5.795
scNanoCT&ATAC-seq	H3K27me3	ATAC	GM12878-H3K27me3-3#20_12	213631683	51201	4172.4	50894	49887	45609	98.0214	6.46929	45266	19134	3.072	39445	4464	5.404
scNanoCT&ATAC-seq	H3K27me3	ATAC	GM12878-H3K27me3-3#20_2	177021441	42706	4145.1	42309	41420	37563	97.8988	5.3277	34220	13315	2.535	35389	3240	5.33
scNanoCT&ATAC-seq	H3K27me3	ATAC	GM12878-H3K27me3-3#20_3	170930486	67345	2538.1	66900	65283	61212	97.583	4.9466	58409	15740	2.093	56437	3270	3.872
scNanoCT&ATAC-seq	H3K27me3	ATAC	GM12878-H3K27me3-3#20_4	239812747	58233	4118.2	57854	56965	52657	98.4634	7.29894	64554	27701	2.412	31925	3731	5.07
scNanoCT&ATAC-seq	H3K27me3	ATAC	GM12878-H3K27me3-3#20_5	225572667	52135	4326.7	51839	50883	46573	98.1558	6.84866	38967	13478	3.548	46892	4917	4.435
scNanoCT&ATAC-seq	H3K27me3	ATAC	GM12878-H3K27me3-3#20_6	321504104	76178	4220.4	75570	74287	67242	98.3022	9.73662	86229	37948	2.551	38635	4505	6.017
scNanoCT&ATAC-seq	H3K27me3	ATAC	GM12878-H3K27me3-3#20_7	237075796	61392	3861.7	60070	59042	53332	98.2887	7.12822	41918	13098	3.618	56158	4127	5.221
scNanoCT&ATAC-seq	H3K27me3	ATAC	GM12878-H3K27me3-3#20_8	177567829	43911	4043.8	43594	42665	38631	97.869	5.34681	34978	13411	2.921	36170	3620	5.161
scNanoCT&ATAC-seq	H3K27me3	ATAC	GM12878-H3K27me3-3#20_9	143363299	35295	4061.9	34898	34101	30866	97.7162	4.28937	27923	10941	2.782	28811	3029	5.977
scNanoCT&ATAC-seq	H3K27me3	ATAC	GM12878-H3K27me3-3#21_1	182580754	48258	3783.4	47855	46933	43254	98.0733	5.4719	49164	21430	2.537	30897	2675	4.809
scNanoCT&ATAC-seq	H3K27me3	ATAC	GM12878-H3K27me3-3#21_10	361457891	84026	4301.7	83474	81465	74357	97.5933	10.9258	80828	33877	2.85	56931	5364	6.918
scNanoCT&ATAC-seq	H3K27me3	ATAC	GM12878-H3K27me3-3#21_11	246622786	57996	4252.4	57426	56453	51587	98.3056	7.47834	60988	24576	2.706	33444	3220	5.63
scNanoCT&ATAC-seq	H3K27me3	ATAC	GM12878-H3K27me3-3#21_12	259635465	62103	4180.7	61680	60527	55177	98.1307	7.87142	64552	28378	2.607	38158	3998	5.589
scNanoCT&ATAC-seq	H3K27me3	ATAC	GM12878-H3K27me3-3#21_2	202253640	49189	4111.8	48537	47509	43299	97.882	6.0683	45127	18772	2.957	35220	3486	5.636
scNanoCT&ATAC-seq	H3K27me3	ATAC	GM12878-H3K27me3-3#21_3	54922378	19457	2822.8	19225	18851	17788	98.0546	1.60038	19667	8777	2.231	13097	1321	4.197
scNanoCT&ATAC-seq	H3K27me3	ATAC	GM12878-H3K27me3-3#21_4	123741512	30410	4069.1	30180	29611	27353	98.1146	3.73818	31751	12282	2.66	18677	1317	5.008
scNanoCT&ATAC-seq	H3K27me3	ATAC	GM12878-H3K27me3-3#21_5	210119600	47880	4388.5	47603	46840	42957	98.3972	6.40367	41734	17027	3.318	37764	4129	6.763
scNanoCT&ATAC-seq	H3K27me3	ATAC	GM12878-H3K27me3-3#21_6	272712897	66722	4087.3	66134	65037	58574	98.3412	8.2394	60524	25390	3.344	47889	4878	5.231
scNanoCT&ATAC-seq	H3K27me3	ATAC	GM12878-H3K27me3-3#21_7	181055319	44955	4027.5	43442	42580	38515	98.0157	5.42139	36143	15247	3.267	34428	3650	4.976
scNanoCT&ATAC-seq	H3K27me3	ATAC	GM12878-H3K27me3-3#21_8	199102982	47691	4174.9	47258	46038	41832	97.4184	5.97927	45612	19549	3.316	31416	2922	6.948
scNanoCT&ATAC-seq	H3K27me3	ATAC	GM12878-H3K27me3-3#21_9	280492780	64906	4321.5	64163	62768	57141	97.8258	8.4755	74232	32077	2.261	31957	3491	6.072
scNanoCT&ATAC-seq	H3K27me3	ATAC	GM12878-H3K27me3-3#22_1	219480718	57585	3811.4	57065	55913	51569	97.9812	6.5763	53224	23261	2.839	42248	4642	4.908
scNanoCT&ATAC-seq	H3K27me3	ATAC	GM12878-H3K27me3-3#22_10	356343401	84939	4195.3	84429	82926	75565	98.2198	10.7972	88157	33103	2.519	52103	5016	5.526
scNanoCT&ATAC-seq	H3K27me3	ATAC	GM12878-H3K27me3-3#22_11	281573475	67302	4183.7	66736	65566	59556	98.2468	8.51717	66822	28195	2.76	43785	5287	5.559
scNanoCT&ATAC-seq	H3K27me3	ATAC	GM12878-H3K27me3-3#22_12	176123263	41858	4207.6	41548	40755	37191	98.0914	5.32673	40460	18185	2.738	28462	3270	6.185
scNanoCT&ATAC-seq	H3K27me3	ATAC	GM12878-H3K27me3-3#22_2	221823534	53717	4129.5	53227	52112	47301	97.9052	6.67125	42842	16740	3.426	44125	4195	4.485
scNanoCT&ATAC-seq	H3K27me3	ATAC	GM12878-H3K27me3-3#22_3	71393368	26113	2734	25875	25379	23865	98.0831	2.07545	24432	10025	2.562	19811	1771	4.032
scNanoCT&ATAC-seq	H3K27me3	ATAC	GM12878-H3K27me3-3#22_4	163967142	40498	4048.8	40191	39437	36424	98.124	4.95614	36735	15079	3.441	30373	3644	5.907
scNanoCT&ATAC-seq	H3K27me3	ATAC	GM12878-H3K27me3-3#22_5	198077179	47323	4185.6	47035	46055	42159	97.9164	5.96259	32344	11196	3.473	45897	5085	5.486
scNanoCT&ATAC-seq	H3K27me3	ATAC	GM12878-H3K27me3-3#22_6	281518101	67127	4193.8	66557	65378	58868	98.2286	8.51325	57568	25556	3.17	49954	7020	6.642
scNanoCT&ATAC-seq	H3K27me3	ATAC	GM12878-H3K27me3-3#22_7	347756263	81905	4245.8	80886	79575	72287	98.3792	10.5406	91625	36085	2.63	40992	5097	6.615
scNanoCT&ATAC-seq	H3K27me3	ATAC	GM12878-H3K27me3-3#22_8	194313772	50691	3833.3	50337	48758	44078	96.8631	5.77074	37666	12337	3.519	44155	3266	6.028
scNanoCT&ATAC-seq	H3K27me3	ATAC	GM12878-H3K27me3-3#22_9	195827305	49608	3947.5	48879	47552	42982	97.2851	5.81647	40807	14264	3.403	38374	3379	6.114
scNanoCT&ATAC-seq	H3K27me3	ATAC	GM12878-H3K27me3-3#23_10	296306785	70447	4206.1	70016	68876	62999	98.3718	8.99672	77344	32649	2.609	39989	3680	5.453
scNanoCT&ATAC-seq	H3K27me3	ATAC	GM12878-H3K27me3-3#23_11	190953135	48019	3976.6	47587	46594	42263	97.9133	5.74512	42086	16126	3.023	35512	4130	5.041
scNanoCT&ATAC-seq	H3K27me3	ATAC	GM12878-H3K27me3-3#23_12	66515630	15735	4227.2	15557	15185	13911	97.6088	1.98856	15203	7804	2.598	10304	747	5.116
scNanoCT&ATAC-seq	H3K27me3	ATAC	GM12878-H3K27me3-3#23_2	214929176	51767	4151.9	51154	50079	45707	97.8985	6.47909	49648	18991	2.77	34600	3658	4.777
scNanoCT&ATAC-seq	H3K27me3	ATAC	GM12878-H3K27me3-3#23_3	53432013	19940	2679.6	19729	19259	18231	97.6177	1.54321	20466	8700	2.374	12981	1249	4.834
scNanoCT&ATAC-seq	H3K27me3	ATAC	GM12878-H3K27me3-3#23_4	198231244	48054	4125.2	47742	46799	43282	98.0248	5.99179	43096	18234	2.925	36213	3938	5.549
scNanoCT&ATAC-seq	H3K27me3	ATAC	GM12878-H3K27me3-3#23_5	310895573	71676	4337.5	71280	70132	64519	98.3895	9.47491	87523	37711	2.662	32096	3600	5.456
scNanoCT&ATAC-seq	H3K27me3	ATAC	GM12878-H3K27me3-3#23_6	309946140	76504	4051.4	75292	73813	66441	98.0356	9.34733	61620	25449	2.922	61080	6826	4.521
scNanoCT&ATAC-seq	H3K27me3	ATAC	GM12878-H3K27me3-3#23_7	267943141	64280	4168.4	63596	62399	56367	98.1178	8.10689	56132	25341	3.58	47006	6258	6.071
scNanoCT&ATAC-seq	H3K27me3	ATAC	GM12878-H3K27me3-3#23_8	205766808	53117	3873.8	52708	51546	46524	97.7954	6.17419	41157	15309	2.36	44814	3913	5.167
scNanoCT&ATAC-seq	H3K27me3	ATAC	GM12878-H3K27me3-3#23_9	171783554	42533	4038.8	42115	41182	37204	97.7846	5.15194	33750	12547	3.808	34361	3784	5.227
scNanoCT&ATAC-seq	H3K27me3	ATAC	GM12878-H3K27me3-3#24_1	197287258	52487	3758.8	52041	50977	46532	97.9555	5.90122	45519	19476	3.151	39665	4447	5.419
scNanoCT&ATAC-seq	H3K27me3	ATAC	GM12878-H3K27me3-3#24_10	196909244	48335	4073.8	47958	46943	42311	97.8836	5.92998	41819	17049	3.056	36143	2979	6.018
scNanoCT&ATAC-seq	H3K27me3	ATAC	GM12878-H3K27me3-3#24_11	290851947	69529	4183.2	68940	67542	60800	97.9721	8.78253	63333	25377	2.895	48875	5392	5.49
scNanoCT&ATAC-seq	H3K27me3	ATAC	GM12878-H3K27me3-3#24_12	167944080	42082	3990.9	41762	40942	36833	98.0365	5.05588	33310	12858	3.074	34100	3230	5.929
scNanoCT&ATAC-seq	H3K27me3	ATAC	GM12878-H3K27me3-3#24_2	267726649	64454	4153.8	63799	62440	56445	97.8699	8.07642	51806	21375	3.336	51200	6536	5.708
scNanoCT&ATAC-seq	H3K27me3	ATAC	GM12878-H3K27me3-3#24_3	80105988	31096	2576.1	30816	30145	28140	97.8226	2.31294	26557	10002	3.222	24368	2356	4.685
scNanoCT&ATAC-seq	H3K27me3	ATAC	GM12878-H3K27me3-3#24_4	200946029	50699	3963.5	50323	49378	45209	98.1221	6.05645	50020	22796	2.718	33378	3731	4.615
scNanoCT&ATAC-seq	H3K27me3	ATAC	GM12878-H3K27me3-3#24_5	238302616	54078	4406.6	53706	52803	48152	98.3186	7.23944	58773	27788	2.632	30763	3993	5.924
scNanoCT&ATAC-seq	H3K27me3	ATAC	GM12878-H3K27me3-3#24_6	227941470	57015	3997.9	56461	55168	49023	97.7099	6.82424	43267	16578	2.848	47210	4498	4.616
scNanoCT&ATAC-seq	H3K27me3	ATAC	GM12878-H3K27me3-3#24_7	299164981	74467	4017.4	72901	71634	64257	98.262	9.01572	65878	23255	3.163	52428	4886	6.015
scNanoCT&ATAC-seq	H3K27me3	ATAC	GM12878-H3K27me3-3#24_8	217985736	57588	3785.3	57185	55861	49918	97.6847	6.52041	44481	16039	2.975	48558	3912	5.179
scNanoCT&ATAC-seq	H3K27me3	ATAC	GM12878-H3K27me3-3#24_9	351128174	86260	4070.6	85426	83963	75580	98.2874	10.5855	95599	40417	2.542	44604	4473	6.146
scNanoCT&ATAC-seq	H3K27me3	ATAC	GM12878-H3K27me3-4#25_1	160852139	40889	3933.9	40539	39698	36515	97.9255	4.82897	38923	17277	2.726	28648	2989	5.965
scNanoCT&ATAC-seq	H3K27me3	ATAC	GM12878-H3K27me3-4#25_10	288554476	69528	4150.2	69136	67912	62453	98.2296	8.74338	75507	29307	2.947	41595	3461	5.376
scNanoCT&ATAC-seq	H3K27me3	ATAC	GM12878-H3K27me3-4#25_11	257075442	60704	4234.9	60246	59317	54358	98.458	7.80578	55198	19773	2.905	44971	4827	5.983
scNanoCT&ATAC-seq	H3K27me3	ATAC	GM12878-H3K27me3-4#25_2	231605278	53344	4341.7	52855	51857	47258	98.1118	7.00676	54455	26054	2.758	33070	3508	5.931
scNanoCT&ATAC-seq	H3K27me3	ATAC	GM12878-H3K27me3-4#25_3	60193975	20728	2904	20563	20169	19103	98.0839	1.76739	20892	8777	2.407	14213	1426	4.313
scNanoCT&ATAC-seq	H3K27me3	ATAC	GM12878-H3K27me3-4#25_4	35868379	13984	2565	13902	13643	13113	98.137	1.03699	12538	4650	2.625	12169	1090	3.022
scNanoCT&ATAC-seq	H3K27me3	ATAC	GM12878-H3K27me3-4#25_5	274465390	62435	4396	62083	60885	55811	98.0703	8.34011	68611	29844	2.395	35165	3583	5.507
scNanoCT&ATAC-seq	H3K27me3	ATAC	GM12878-H3K27me3-4#25_6	203419299	49547	4105.6	49203	48308	44637	98.181	6.13885	40978	17539	2.944	41466	5275	5.308
scNanoCT&ATAC-seq	H3K27me3	ATAC	GM12878-H3K27me3-4#25_7	257664935	64206	4013.1	63101	61863	56891	98.0381	7.75562	48690	16655	3.091	55716	5216	4.798
scNanoCT&ATAC-seq	H3K27me3	ATAC	GM12878-H3K27me3-4#25_8	111261953	36365	3059.6	36124	35395	33408	97.982	3.28357	37495	14540	2.634	25185	2255	3.818
scNanoCT&ATAC-seq	H3K27me3	ATAC	GM12878-H3K27me3-4#25_9	206658353	48334	4275.6	47822	46799	42696	97.8608	6.20837	45288	18839	3.204	33501	3557	5.425
scNanoCT&ATAC-seq	H3K27me3	ATAC	GM12878-H3K27me3-4#26_1	276387276	73159	3777.9	72623	71150	64846	97.9717	8.29161	72266	33002	2.559	47120	5733	5.705
scNanoCT&ATAC-seq	H3K27me3	ATAC	GM12878-H3K27me3-4#26_10	173344679	39058	4438.1	38797	38065	35356	98.1133	5.25645	35407	15441	2.729	30569	3886	5.892
scNanoCT&ATAC-seq	H3K27me3	ATAC	GM12878-H3K27me3-4#26_11	167894426	42005	3997	41505	40587	37539	97.7882	5.0345	32977	11626	3.451	35931	3918	5.482
scNanoCT&ATAC-seq	H3K27me3	ATAC	GM12878-H3K27me3-4#26_12	171092296	40550	4219.3	40257	39477	35925	98.0624	5.17551	36354	17370	3.215	30188	3896	5.3
scNanoCT&ATAC-seq	H3K27me3	ATAC	GM12878-H3K27me3-4#26_2	283712152	67029	4232.7	66410	65330	58851	98.3737	8.60838	66358	28029	2.928	42159	4313	5.981
scNanoCT&ATAC-seq	H3K27me3	ATAC	GM12878-H3K27me3-4#26_3	72685436	25979	2797.9	25722	25207	23632	97.9978	2.12012	25775	11904	2.268	17272	1580	3.354
scNanoCT&ATAC-seq	H3K27me3	ATAC	GM12878-H3K27me3-4#26_4	133636751	32677	4089.6	32355	31612	28948	97.7036	4.01723	28889	12660	3.382	24195	2412	6.252
scNanoCT&ATAC-seq	H3K27me3	ATAC	GM12878-H3K27me3-4#26_5	184181808	42955	4287.8	42718	41783	38318	97.8112	5.56871	38081	16145	3.548	32819	4362	5.185
scNanoCT&ATAC-seq	H3K27me3	ATAC	GM12878-H3K27me3-4#26_6	200931301	48671	4128.4	48266	47251	43155	97.8971	6.04846	39520	18188	2.857	39862	4588	4.97
scNanoCT&ATAC-seq	H3K27me3	ATAC	GM12878-H3K27me3-4#26_7	326175481	79450	4105.4	78666	77425	70939	98.4224	9.88781	83310	35505	2.646	47528	4647	4.859
scNanoCT&ATAC-seq	H3K27me3	ATAC	GM12878-H3K27me3-4#26_8	184222520	43222	4262.2	42853	42147	38704	98.3525	5.59975	38072	16388	2.821	32390	3716	6.831
scNanoCT&ATAC-seq	H3K27me3	ATAC	GM12878-H3K27me3-4#26_9	341465541	80569	4238.2	79883	78695	71159	98.5128	10.3593	85991	36939	2.543	45586	4476	5.08
scNanoCT&ATAC-seq	H3K27me3	ATAC	GM12878-H3K27me3-4#27_1	213945229	54130	3952.4	53733	52490	47565	97.6867	6.41371	53546	25017	2.406	34700	3792	6.884
scNanoCT&ATAC-seq	H3K27me3	ATAC	GM12878-H3K27me3-4#27_10	344036215	78589	4377.7	78145	76818	69003	98.3019	10.461	74261	31215	2.468	54273	6239	4.637
scNanoCT&ATAC-seq	H3K27me3	ATAC	GM12878-H3K27me3-4#27_11	348754705	83632	4170.1	82978	81483	72424	98.1983	10.5406	72522	31873	3.045	62070	6422	4.173
scNanoCT&ATAC-seq	H3K27me3	ATAC	GM12878-H3K27me3-4#27_2	294764164	66129	4457.4	65502	64142	57527	97.9237	8.93193	72106	32218	2.165	33807	4139	6.674
scNanoCT&ATAC-seq	H3K27me3	ATAC	GM12878-H3K27me3-4#27_3	119201547	41078	2901.8	40762	39801	37060	97.6424	3.49244	45874	17209	2.84	23355	1982	5.414
scNanoCT&ATAC-seq	H3K27me3	ATAC	GM12878-H3K27me3-4#27_4	282765311	68904	4103.8	68502	67355	61184	98.3256	8.57472	74621	33151	1.951	38325	3964	4.888
scNanoCT&ATAC-seq	H3K27me3	ATAC	GM12878-H3K27me3-4#27_5	373246761	85555	4362.7	85071	83447	74579	98.091	11.3574	86527	38232	2.724	51611	5622	5.246
scNanoCT&ATAC-seq	H3K27me3	ATAC	GM12878-H3K27me3-4#27_6	271821056	64589	4208.5	64049	62852	56393	98.1311	8.20033	56794	24586	2.867	47378	5165	5.375
scNanoCT&ATAC-seq	H3K27me3	ATAC	GM12878-H3K27me3-4#27_7	321110391	76861	4177.8	75501	74169	66703	98.2358	9.71199	71442	31071	2.726	51791	5753	5.75
scNanoCT&ATAC-seq	H3K27me3	ATAC	GM12878-H3K27me3-4#27_8	318807123	75478	4223.8	74883	73665	65985	98.3735	9.67436	72290	30703	2.921	49909	4717	5.255
scNanoCT&ATAC-seq	H3K27me3	ATAC	GM12878-H3K27me3-4#27_9	383404754	91062	4210.4	90368	88712	79293	98.1675	11.6013	92554	38832	2.692	54268	5501	4.794
scNanoCT&ATAC-seq	H3K27me3	ATAC	GM12878-H3K27me3-4#28_1	219057779	56096	3905.1	55670	54730	49710	98.3115	6.606	55153	22517	2.719	37680	3913	4.677
scNanoCT&ATAC-seq	H3K27me3	ATAC	GM12878-H3K27me3-4#28_10	250624972	60667	4131.2	60292	59268	55186	98.3016	7.59453	63530	26828	2.732	39923	3548	4.499
scNanoCT&ATAC-seq	H3K27me3	ATAC	GM12878-H3K27me3-4#28_11	228837333	55537	4120.4	55084	54094	50316	98.2027	6.90863	56794	25008	2.663	36263	4674	5.394
scNanoCT&ATAC-seq	H3K27me3	ATAC	GM12878-H3K27me3-4#28_12	223657950	53283	4197.5	52880	52101	48100	98.5269	6.80371	54668	23105	3.127	35305	3481	5.35
scNanoCT&ATAC-seq	H3K27me3	ATAC	GM12878-H3K27me3-4#28_2	367320040	89146	4120.4	88437	87069	77911	98.4531	11.1313	80071	33793	2.43	63737	5618	4.594
scNanoCT&ATAC-seq	H3K27me3	ATAC	GM12878-H3K27me3-4#28_3	100732516	37262	2703.4	37003	36196	33664	97.8191	2.93325	36307	14598	3.064	26079	1843	3.592
scNanoCT&ATAC-seq	H3K27me3	ATAC	GM12878-H3K27me3-4#28_4	167489941	41063	4078.9	40734	39862	36286	97.8593	5.03948	30749	10988	3.068	36199	3885	4.97
scNanoCT&ATAC-seq	H3K27me3	ATAC	GM12878-H3K27me3-4#28_5	262861939	62563	4201.6	62223	61182	54980	98.327	7.98971	54355	22261	3.084	47882	4942	5.958
scNanoCT&ATAC-seq	H3K27me3	ATAC	GM12878-H3K27me3-4#28_6	208711897	50727	4114.4	50246	49245	44871	98.0078	6.28249	41241	15711	2.738	41270	4564	5.747
scNanoCT&ATAC-seq	H3K27me3	ATAC	GM12878-H3K27me3-4#28_7	244519107	60564	4037.4	59505	58254	53097	97.8977	7.33987	58115	24964	2.993	38708	3886	6.037
scNanoCT&ATAC-seq	H3K27me3	ATAC	GM12878-H3K27me3-4#28_8	361875631	86333	4191.6	85709	83951	76926	97.9489	10.9451	100868	42942	2.082	42121	1579	3.036
scNanoCT&ATAC-seq	H3K27me3	ATAC	GM12878-H3K27me3-4#28_9	562459748	141403	3977.7	140187	137367	123477	97.9884	16.9334	155407	65565	2.348	73851	3654	3.816
scNanoCT&ATAC-seq	H3K27me3	ATAC	GM12878-H3K27me3-4#29_1	213069079	56100	3798	55635	54540	49325	98.0318	6.38405	52769	22533	2.979	38670	3820	5.063
scNanoCT&ATAC-seq	H3K27me3	ATAC	GM12878-H3K27me3-4#29_10	184097694	42932	4288.1	42667	41925	37925	98.261	5.57105	35580	13836	2.858	34668	3214	6.094
scNanoCT&ATAC-seq	H3K27me3	ATAC	GM12878-H3K27me3-4#29_11	314155261	74933	4192.5	74276	72840	65728	98.0667	9.49124	80218	38246	2.381	41234	4870	5.589
scNanoCT&ATAC-seq	H3K27me3	ATAC	GM12878-H3K27me3-4#29_12	164773127	47989	3433.6	47660	46740	42353	98.0697	4.9115	44907	19121	2.454	33806	3552	5.735
scNanoCT&ATAC-seq	H3K27me3	ATAC	GM12878-H3K27me3-4#29_2	260188640	61204	4251.2	60547	59396	53048	98.099	7.85461	57644	25403	3.419	40498	5125	5.718
scNanoCT&ATAC-seq	H3K27me3	ATAC	GM12878-H3K27me3-4#29_3	76744637	26928	2850	26646	26080	24244	97.8759	2.23343	24143	9854	2.547	20566	2304	5.051
scNanoCT&ATAC-seq	H3K27me3	ATAC	GM12878-H3K27me3-4#29_4	322358526	73454	4388.6	72983	71824	65553	98.412	9.83792	79735	27262	2.739	40273	5341	5.048
scNanoCT&ATAC-seq	H3K27me3	ATAC	GM12878-H3K27me3-4#29_5	265332066	60253	4403.6	59936	58727	52730	97.9828	8.05691	60961	28302	2.663	37346	4486	5.187
scNanoCT&ATAC-seq	H3K27me3	ATAC	GM12878-H3K27me3-4#29_6	332838921	79426	4190.6	78826	77284	68981	98.0438	10.0631	69203	26919	3.201	58414	6263	5.911
scNanoCT&ATAC-seq	H3K27me3	ATAC	GM12878-H3K27me3-4#29_7	214351242	57094	3754.4	56448	54950	48980	97.3462	6.37638	43852	13470	2.954	47030	2886	5.828
scNanoCT&ATAC-seq	H3K27me3	ATAC	GM12878-H3K27me3-4#29_8	487085927	121733	4001.3	120808	118184	106190	97.828	14.6723	115494	38137	2.404	82318	5670	4.018
scNanoCT&ATAC-seq	H3K27me3	ATAC	GM12878-H3K27me3-4#29_9	328284505	78946	4158.3	78268	76858	68555	98.1985	9.90931	76488	33891	2.555	50677	4897	5.034
scNanoCT&ATAC-seq	H3K27me3	ATAC	GM12878-H3K27me3-4#30_1	89241612	24373	3661.5	24134	23433	21345	97.0954	2.63005	14137	4548	3.339	25241	2802	5.057
scNanoCT&ATAC-seq	H3K27me3	ATAC	GM12878-H3K27me3-4#30_10	283424427	64286	4408.8	63905	62704	57527	98.1206	8.60952	58037	23716	2.939	48232	5793	5.739
scNanoCT&ATAC-seq	H3K27me3	ATAC	GM12878-H3K27me3-4#30_11	203817316	48656	4188.9	48202	47342	43105	98.2158	6.1619	40598	15900	2.875	38663	3307	6.005
scNanoCT&ATAC-seq	H3K27me3	ATAC	GM12878-H3K27me3-4#30_12	207445162	53023	3912.4	52654	51443	46342	97.7001	6.22802	39916	14354	2.707	46476	4615	5.473
scNanoCT&ATAC-seq	H3K27me3	ATAC	GM12878-H3K27me3-4#30_2	317344741	72881	4354.3	72156	71053	64039	98.4714	9.65349	81738	33892	2.734	37082	3470	5.24
scNanoCT&ATAC-seq	H3K27me3	ATAC	GM12878-H3K27me3-4#30_3	71620636	24510	2922.1	24277	23825	22131	98.1382	2.09931	23875	10758	2.587	16766	2031	5.728
scNanoCT&ATAC-seq	H3K27me3	ATAC	GM12878-H3K27me3-4#30_4	193583381	49157	3938.1	48822	47823	43470	97.9538	5.83201	38187	15311	3.811	41758	4998	5.515
scNanoCT&ATAC-seq	H3K27me3	ATAC	GM12878-H3K27me3-4#30_5	246058613	58052	4238.6	57721	56655	50917	98.1532	7.47021	56252	24267	3.306	38825	4574	5.727
scNanoCT&ATAC-seq	H3K27me3	ATAC	GM12878-H3K27me3-4#30_6	396891477	107463	3693.3	106754	104434	93194	97.8268	11.8839	102604	33844	2.894	72104	5047	4.456
scNanoCT&ATAC-seq	H3K27me3	ATAC	GM12878-H3K27me3-4#30_7	283060739	71744	3945.4	68090	66845	60699	98.1715	8.50762	67480	28015	3.031	44589	4736	5.637
scNanoCT&ATAC-seq	H3K27me3	ATAC	GM12878-H3K27me3-4#30_8	243589813	61729	3946.1	61318	60214	54334	98.1995	7.35435	60427	24759	2.763	41039	3691	5.34
scNanoCT&ATAC-seq	H3K27me3	ATAC	GM12878-H3K27me3-4#30_9	335312258	79643	4210.2	78612	77049	69252	98.0118	10.1244	85956	36894	2.357	42183	4253	5.946
scNanoCT&ATAC-seq	H3K27me3	ATAC	GM12878-H3K27me3-4#31_1	306943359	79634	3854.4	79062	77790	69740	98.3911	9.25701	78123	34237	2.992	50202	5777	5.48
scNanoCT&ATAC-seq	H3K27me3	ATAC	GM12878-H3K27me3-4#31_10	479371655	111188	4311.4	110540	107884	96266	97.5972	14.4694	123464	51024	2.42	56829	5658	5.112
scNanoCT&ATAC-seq	H3K27me3	ATAC	GM12878-H3K27me3-4#31_11	97390905	22425	4343	22061	21530	19206	97.593	2.89289	13808	6407	4.996	20610	3200	5.876
scNanoCT&ATAC-seq	H3K27me3	ATAC	GM12878-H3K27me3-4#31_2	325512651	77588	4195.4	76895	75448	67051	98.1182	9.82731	75046	32948	2.51	49315	5414	5.249
scNanoCT&ATAC-seq	H3K27me3	ATAC	GM12878-H3K27me3-4#31_3	104621701	37648	2778.9	37366	36695	34103	98.2042	3.0649	37723	16938	2.663	25256	2786	5.336
scNanoCT&ATAC-seq	H3K27me3	ATAC	GM12878-H3K27me3-4#31_4	230268363	54901	4194.2	54521	53469	48260	98.0705	6.96505	42155	16683	3.15	46964	4866	5.213
scNanoCT&ATAC-seq	H3K27me3	ATAC	GM12878-H3K27me3-4#31_5	349594948	83640	4179.8	83165	81714	72617	98.2553	10.6006	73415	29692	2.8	63046	6323	5.05
scNanoCT&ATAC-seq	H3K27me3	ATAC	GM12878-H3K27me3-4#31_6	459368933	151255	3037	150201	146628	128894	97.6212	13.4715	117106	34772	2.04	125076	3565	2.407
scNanoCT&ATAC-seq	H3K27me3	ATAC	GM12878-H3K27me3-4#31_7	273971857	67410	4064.3	66723	65424	57922	98.0531	8.23716	65858	28190	3.076	41429	5156	5.212
scNanoCT&ATAC-seq	H3K27me3	ATAC	GM12878-H3K27me3-4#31_8	314607149	74157	4242.4	73621	72341	64371	98.2614	9.53861	81361	36940	2.22	38086	4171	5.668
scNanoCT&ATAC-seq	H3K27me3	ATAC	GM12878-H3K27me3-4#31_9	381886620	91011	4196	90032	88284	78067	98.0585	11.5015	89203	41103	2.477	55558	5707	5.609
scNanoCT&ATAC-seq	H3K27me3	ATAC	GM12878-H3K27me3-4#32_1	299692418	77014	3891.4	76520	75343	67912	98.4618	9.05327	91360	36974	2.301	33518	3834	5.007
scNanoCT&ATAC-seq	H3K27me3	ATAC	GM12878-H3K27me3-4#32_10	223036628	53064	4203.2	52742	51270	45736	97.2091	6.67029	42474	18400	3.293	41436	3500	6.356
scNanoCT&ATAC-seq	H3K27me3	ATAC	GM12878-H3K27me3-4#32_11	586142420	141473	4143.1	140529	138123	122568	98.2879	17.7709	159726	63599	2.579	68376	7661	5.219
scNanoCT&ATAC-seq	H3K27me3	ATAC	GM12878-H3K27me3-4#32_12	301025207	77387	3889.9	76899	75662	67434	98.3914	9.09366	74876	34016	2.735	50519	5730	4.785
scNanoCT&ATAC-seq	H3K27me3	ATAC	GM12878-H3K27me3-4#32_2	390634030	91153	4285.5	90491	88890	79133	98.2308	11.837	95410	40704	2.577	51639	5624	6.001
scNanoCT&ATAC-seq	H3K27me3	ATAC	GM12878-H3K27me3-4#32_3	85460425	30742	2779.9	30472	29896	27762	98.1097	2.49484	27764	11719	2.577	23743	2508	4.781
scNanoCT&ATAC-seq	H3K27me3	ATAC	GM12878-H3K27me3-4#32_4	148706631	36031	4127.2	35755	34999	31793	97.8856	4.48802	35343	15809	2.74	23513	2201	6.151
scNanoCT&ATAC-seq	H3K27me3	ATAC	GM12878-H3K27me3-4#32_5	339350141	86908	3904.7	86465	84733	75402	97.9969	10.2156	76174	27154	2.828	64638	5713	4.54
scNanoCT&ATAC-seq	H3K27me3	ATAC	GM12878-H3K27me3-4#32_6	409008874	102554	3988.2	101841	99824	88438	98.0195	12.3195	89356	35592	2.955	73835	8325	5.996
scNanoCT&ATAC-seq	H3K27me3	ATAC	GM12878-H3K27me3-4#32_7	294634607	71893	4098.2	71100	69612	61772	97.9072	8.86538	70416	31075	2.921	43170	5168	5.713
scNanoCT&ATAC-seq	H3K27me3	ATAC	GM12878-H3K27me3-4#32_8	433219278	101456	4270	100725	98733	87803	98.0223	13.133	98328	40778	2.396	64759	7496	4.962
scNanoCT&ATAC-seq	H3K27me3	ATAC	GM12878-H3K27me3-4#32_9	247651312	63348	3909.4	61523	60391	53351	98.16	7.42776	47029	16635	2.978	52080	5455	6.013
scNanoCT&ATAC-seq	H3K4me3	ATAC	GM12878-H3K4me3-1#10_1	208628996	64723	3223.4	64347	63426	51311	98.5687	6.19815	46092	22161	2.493	48960	3769	2.797
scNanoCT&ATAC-seq	H3K4me3	ATAC	GM12878-H3K4me3-1#10_10	299910185	77901	3849.9	77496	76318	59729	98.4799	9.02591	53928	28125	2.286	57645	6596	2.1
scNanoCT&ATAC-seq	H3K4me3	ATAC	GM12878-H3K4me3-1#10_11	307781868	86124	3573.7	85633	83839	64814	97.905	9.16036	61989	39649	2.23	58301	8279	3.682
scNanoCT&ATAC-seq	H3K4me3	ATAC	GM12878-H3K4me3-1#10_12	575026824	150125	3830.3	149366	145902	114237	97.6809	17.2224	128125	51198	2.619	85488	5962	2.373
scNanoCT&ATAC-seq	H3K4me3	ATAC	GM12878-H3K4me3-1#10_2	245962297	65046	3781.4	64572	63614	49446	98.5164	7.36357	48714	24593	2.047	43129	4803	2.48
scNanoCT&ATAC-seq	H3K4me3	ATAC	GM12878-H3K4me3-1#10_3	155253070	60457	2568	60057	59022	48511	98.2766	4.49563	44484	23417	1.891	44321	5076	2.699
scNanoCT&ATAC-seq	H3K4me3	ATAC	GM12878-H3K4me3-1#10_4	133048263	40971	3247.4	40755	39846	33197	97.7696	3.91542	29901	14982	2.058	31820	3240	2.017
scNanoCT&ATAC-seq	H3K4me3	ATAC	GM12878-H3K4me3-1#10_5	243730327	63409	3843.8	63139	62217	49386	98.5397	7.36048	48020	23624	1.857	44897	4012	2.497
scNanoCT&ATAC-seq	H3K4me3	ATAC	GM12878-H3K4me3-1#10_6	302666672	87444	3461.3	86750	85338	65155	98.3723	9.01589	58364	37071	2.145	62094	8451	2.704
scNanoCT&ATAC-seq	H3K4me3	ATAC	GM12878-H3K4me3-1#10_7	669106539	188275	3553.9	187139	184311	137073	98.4888	20.0442	125983	71580	2.213	127747	15580	2.659
scNanoCT&ATAC-seq	H3K4me3	ATAC	GM12878-H3K4me3-1#10_8	243885201	61742	3950.1	61400	60271	46287	98.1612	7.32819	40683	22754	2.615	46434	5688	2.454
scNanoCT&ATAC-seq	H3K4me3	ATAC	GM12878-H3K4me3-1#10_9	442156486	130065	3399.5	125097	122642	94931	98.0375	13.1201	95661	37833	1.806	81884	6727	1.916
scNanoCT&ATAC-seq	H3K4me3	ATAC	GM12878-H3K4me3-1#11_1	178063834	51988	3425.1	51645	50755	41857	98.2767	5.32425	40201	18709	1.986	38450	3824	2.879
scNanoCT&ATAC-seq	H3K4me3	ATAC	GM12878-H3K4me3-1#11_10	225639171	57940	3894.4	57570	56567	45142	98.2578	6.79217	43229	22142	1.886	42030	4806	3.27
scNanoCT&ATAC-seq	H3K4me3	ATAC	GM12878-H3K4me3-1#11_11	296693489	81118	3657.6	80683	79109	61932	98.0492	8.87983	55777	30813	2.06	60639	8411	3.093
scNanoCT&ATAC-seq	H3K4me3	ATAC	GM12878-H3K4me3-1#11_12	149177033	40196	3711.2	39973	39188	31277	98.0362	4.46383	29557	13865	3.128	28910	2757	3.074
scNanoCT&ATAC-seq	H3K4me3	ATAC	GM12878-H3K4me3-1#11_2	357690127	94073	3802.3	93468	92133	73181	98.5717	10.7893	72280	38191	2.046	64931	6420	2.995
scNanoCT&ATAC-seq	H3K4me3	ATAC	GM12878-H3K4me3-1#11_3	123285558	43281	2848.5	42970	42198	35417	98.2034	3.61644	33429	17122	1.893	31834	3516	2.453
scNanoCT&ATAC-seq	H3K4me3	ATAC	GM12878-H3K4me3-1#11_4	140129942	41109	3408.7	40891	40256	33674	98.4471	4.18153	31575	15463	1.604	31417	3498	2.55
scNanoCT&ATAC-seq	H3K4me3	ATAC	GM12878-H3K4me3-1#11_5	236824932	62099	3813.7	61853	60844	49375	98.3687	7.12573	44672	23462	1.658	47893	4571	2.123
scNanoCT&ATAC-seq	H3K4me3	ATAC	GM12878-H3K4me3-1#11_6	221974480	62451	3554.4	60984	59902	47093	98.2258	6.61234	45518	22588	1.836	42789	4613	1.98
scNanoCT&ATAC-seq	H3K4me3	ATAC	GM12878-H3K4me3-1#11_7	360226592	100053	3600.4	97524	96248	73825	98.6916	10.8183	71079	34891	2.469	65625	7354	2.819
scNanoCT&ATAC-seq	H3K4me3	ATAC	GM12878-H3K4me3-1#11_8	196188294	50231	3905.7	49926	49039	38627	98.2234	5.9091	35931	20244	1.865	36702	4547	3.007
scNanoCT&ATAC-seq	H3K4me3	ATAC	GM12878-H3K4me3-1#11_9	248323884	116362	2134.1	69646	67423	53833	96.8081	6.75481	52537	28526	2.023	48441	5370	2.928
scNanoCT&ATAC-seq	H3K4me3	ATAC	GM12878-H3K4me3-1#12_1	349198463	112987	3090.6	112354	110455	93000	98.3098	10.3337	92329	37579	1.901	81925	7045	1.834
scNanoCT&ATAC-seq	H3K4me3	ATAC	GM12878-H3K4me3-1#12_10	359131055	92542	3880.7	92099	90717	71995	98.4994	10.8329	72565	33542	2.624	62113	5366	2.183
scNanoCT&ATAC-seq	H3K4me3	ATAC	GM12878-H3K4me3-1#12_11	288189321	78911	3652.1	78508	77448	60597	98.6498	8.67174	59540	28782	2.533	53163	4107	3.243
scNanoCT&ATAC-seq	H3K4me3	ATAC	GM12878-H3K4me3-1#12_12	266872064	76115	3506.2	75787	74374	59610	98.1356	7.9828	48952	24627	2.107	62913	6133	1.752
scNanoCT&ATAC-seq	H3K4me3	ATAC	GM12878-H3K4me3-1#12_2	162711511	42537	3825.2	42123	41374	32871	98.2219	4.8518	28295	18313	2.262	31685	4529	3.487
scNanoCT&ATAC-seq	H3K4me3	ATAC	GM12878-H3K4me3-1#12_3	95009582	32077	2961.9	31829	31267	26285	98.2343	2.7871	24460	11615	1.85	24449	2358	2.686
scNanoCT&ATAC-seq	H3K4me3	ATAC	GM12878-H3K4me3-1#12_4	132630763	40246	3295.5	40048	39345	32958	98.2446	3.94841	29666	14433	1.659	31102	2820	2.571
scNanoCT&ATAC-seq	H3K4me3	ATAC	GM12878-H3K4me3-1#12_5	188975577	47009	4020	46814	46195	37390	98.6777	5.72492	38088	16907	2.459	31874	2371	2.355
scNanoCT&ATAC-seq	H3K4me3	ATAC	GM12878-H3K4me3-1#12_6	340194748	98312	3460.4	96503	95129	73448	98.5762	10.1715	63418	32272	2.148	73522	6706	2.44
scNanoCT&ATAC-seq	H3K4me3	ATAC	GM12878-H3K4me3-1#12_7	393529177	108375	3631.2	105154	103685	80299	98.603	11.8005	77796	41325	2.06	70566	7381	2.66
scNanoCT&ATAC-seq	H3K4me3	ATAC	GM12878-H3K4me3-1#12_8	255775076	66398	3852.2	65461	64141	50214	97.9835	7.6845	51289	22417	2.462	42422	4304	2.64
scNanoCT&ATAC-seq	H3K4me3	ATAC	GM12878-H3K4me3-1#12_9	199243621	62065	3210.2	55756	54532	43441	97.8047	5.8382	41863	24100	2.008	39551	5090	2.272
scNanoCT&ATAC-seq	H3K4me3	ATAC	GM12878-H3K4me3-1#13_1	132496863	43112	3073.3	42896	42143	34990	98.2446	3.91537	33341	15427	2.103	32294	3049	2.069
scNanoCT&ATAC-seq	H3K4me3	ATAC	GM12878-H3K4me3-1#13_10	256998110	76563	3356.7	76261	74351	59354	97.4954	7.6024	52800	20569	2.292	58401	3633	2.2
scNanoCT&ATAC-seq	H3K4me3	ATAC	GM12878-H3K4me3-1#13_11	314530954	88941	3536.4	88485	86991	67133	98.3116	9.41848	60709	31078	1.904	65340	7025	2.653
scNanoCT&ATAC-seq	H3K4me3	ATAC	GM12878-H3K4me3-1#13_12	207329304	63584	3260.7	63341	62385	48684	98.4907	6.18569	45009	23099	2.396	46456	5272	2.074
scNanoCT&ATAC-seq	H3K4me3	ATAC	GM12878-H3K4me3-1#13_2	240311788	64627	3718.4	64266	63363	48921	98.5949	7.20867	47122	24700	1.851	43810	4825	2.789
scNanoCT&ATAC-seq	H3K4me3	ATAC	GM12878-H3K4me3-1#13_3	33160551	12033	2755.8	11896	11669	9983	98.0918	0.948861	7783	4997	2.699	9838	1572	3.779
scNanoCT&ATAC-seq	H3K4me3	ATAC	GM12878-H3K4me3-1#13_4	96190887	30004	3205.9	29863	29393	24420	98.4261	2.85174	19778	12070	2.033	25565	3312	2.884
scNanoCT&ATAC-seq	H3K4me3	ATAC	GM12878-H3K4me3-1#13_5	244089347	66562	3667.1	66285	65324	52255	98.5502	7.34503	49368	26424	1.925	48727	5663	2.632
scNanoCT&ATAC-seq	H3K4me3	ATAC	GM12878-H3K4me3-1#13_6	340801312	96018	3549.3	95534	93737	71131	98.119	10.1808	64291	35946	2.259	70130	8503	2.229
scNanoCT&ATAC-seq	H3K4me3	ATAC	GM12878-H3K4me3-1#13_7	280296920	83658	3350.5	83203	81846	63311	98.369	8.34364	54716	29914	1.901	63749	7109	2.344
scNanoCT&ATAC-seq	H3K4me3	ATAC	GM12878-H3K4me3-1#13_8	313350926	82726	3787.8	82365	80857	61366	98.1691	9.42416	57702	29410	2.065	57283	6077	2.376
scNanoCT&ATAC-seq	H3K4me3	ATAC	GM12878-H3K4me3-1#13_9	259151454	84754	3057.7	74942	73075	57092	97.5087	7.56148	59472	29505	1.826	47243	5275	2.611
scNanoCT&ATAC-seq	H3K4me3	ATAC	GM12878-H3K4me3-1#14_1	154806952	47029	3291.7	46762	46138	38807	98.6656	4.62716	36805	19139	1.899	35649	3644	2.598
scNanoCT&ATAC-seq	H3K4me3	ATAC	GM12878-H3K4me3-1#14_10	247528564	64819	3818.8	64370	63241	51645	98.2461	7.45299	48823	24932	1.792	48012	5064	2.473
scNanoCT&ATAC-seq	H3K4me3	ATAC	GM12878-H3K4me3-1#14_11	230658565	63421	3636.9	63124	61818	50250	97.9311	6.90729	48190	23659	2.046	46397	4558	2.866
scNanoCT&ATAC-seq	H3K4me3	ATAC	GM12878-H3K4me3-1#14_12	198487843	52902	3752	52663	51676	41890	98.1258	5.9576	37883	19967	2.081	40213	4948	3.047
scNanoCT&ATAC-seq	H3K4me3	ATAC	GM12878-H3K4me3-1#14_2	224693207	62221	3611.2	61878	60808	49494	98.2708	6.7326	44595	23105	1.751	48064	5032	1.882
scNanoCT&ATAC-seq	H3K4me3	ATAC	GM12878-H3K4me3-1#14_3	102681415	37199	2760.3	37002	36494	31366	98.6271	3.02154	28434	14595	2.103	29486	3171	3.098
scNanoCT&ATAC-seq	H3K4me3	ATAC	GM12878-H3K4me3-1#14_4	142145112	43007	3305.2	42825	42068	36297	98.2323	4.23344	35049	20076	2.054	32161	4093	2.85
scNanoCT&ATAC-seq	H3K4me3	ATAC	GM12878-H3K4me3-1#14_5	231296699	59518	3886.2	59299	58325	47903	98.3575	6.99611	45112	27974	2.197	45199	6168	2.704
scNanoCT&ATAC-seq	H3K4me3	ATAC	GM12878-H3K4me3-1#14_6	166479772	46737	3562.1	46436	45365	36594	97.6936	4.93882	32326	18726	2.114	36452	4591	2.727
scNanoCT&ATAC-seq	H3K4me3	ATAC	GM12878-H3K4me3-1#14_7	196129232	52088	3765.3	51716	51006	40845	98.6271	5.89892	40898	19233	2.468	35049	3252	2.843
scNanoCT&ATAC-seq	H3K4me3	ATAC	GM12878-H3K4me3-1#14_8	276356423	72131	3831.3	71809	70539	56685	98.2314	8.33116	49725	26842	1.969	55824	6489	2.661
scNanoCT&ATAC-seq	H3K4me3	ATAC	GM12878-H3K4me3-1#14_9	263991857	81178	3252	73530	72387	59085	98.4455	7.8417	61967	33419	2.448	48319	5385	2.493
scNanoCT&ATAC-seq	H3K4me3	ATAC	GM12878-H3K4me3-1#15_1	132520299	45034	2942.7	44782	44052	37664	98.3699	3.89633	34070	21629	1.805	35758	4595	3.263
scNanoCT&ATAC-seq	H3K4me3	ATAC	GM12878-H3K4me3-1#15_10	228209985	64150	3557.4	63877	62819	51811	98.3437	6.84433	53053	24017	1.834	44815	3602	2.184
scNanoCT&ATAC-seq	H3K4me3	ATAC	GM12878-H3K4me3-1#15_11	175895211	50565	3478.6	50295	49384	40425	98.1887	5.24691	42461	18625	2.712	33909	2720	2.281
scNanoCT&ATAC-seq	H3K4me3	ATAC	GM12878-H3K4me3-1#15_12	125429247	38261	3278.3	38053	37497	31058	98.5389	3.73535	30322	12681	2.424	27973	2354	2.615
scNanoCT&ATAC-seq	H3K4me3	ATAC	GM12878-H3K4me3-1#15_2	201279601	56700	3549.9	56322	55426	45555	98.4091	6.0128	41305	21619	2.36	43559	4216	2.162
scNanoCT&ATAC-seq	H3K4me3	ATAC	GM12878-H3K4me3-1#15_3	65675947	25826	2543	25631	25199	21894	98.3145	1.89764	19039	10038	1.615	21109	2597	2.535
scNanoCT&ATAC-seq	H3K4me3	ATAC	GM12878-H3K4me3-1#15_4	120013279	39351	3049.8	39189	38600	33326	98.497	3.55739	29277	14955	1.701	32012	3260	2.695
scNanoCT&ATAC-seq	H3K4me3	ATAC	GM12878-H3K4me3-1#15_5	161599958	45222	3573.5	45016	44349	36732	98.5183	4.85433	33025	17798	1.713	34757	4068	2.61
scNanoCT&ATAC-seq	H3K4me3	ATAC	GM12878-H3K4me3-1#15_6	225970111	68897	3279.8	68395	67267	54226	98.3508	6.70849	48952	25314	1.804	52981	5724	2.247
scNanoCT&ATAC-seq	H3K4me3	ATAC	GM12878-H3K4me3-1#15_7	216253878	62736	3447	62294	61281	48989	98.3738	6.44048	46072	24635	2.173	44908	5741	2.104
scNanoCT&ATAC-seq	H3K4me3	ATAC	GM12878-H3K4me3-1#15_8	177508777	49963	3552.8	49715	48942	39414	98.4451	5.31818	35637	19107	2.265	37415	4508	3.307
scNanoCT&ATAC-seq	H3K4me3	ATAC	GM12878-H3K4me3-1#15_9	213035273	64215	3317.5	62357	61056	49958	97.9136	6.31475	48703	26990	2.25	43175	5532	2.646
scNanoCT&ATAC-seq	H3K4me3	ATAC	GM12878-H3K4me3-1#16_1	87239923	29253	2982.3	29097	28575	24469	98.206	2.56421	21741	11638	1.828	24100	2756	3.645
scNanoCT&ATAC-seq	H3K4me3	ATAC	GM12878-H3K4me3-1#16_10	208070244	56943	3654	56686	55713	45166	98.2835	6.24093	41464	22145	1.936	43459	4741	2.252
scNanoCT&ATAC-seq	H3K4me3	ATAC	GM12878-H3K4me3-1#16_11	216681496	62741	3453.6	62441	61365	49444	98.2768	6.47244	45389	23681	1.925	47366	4659	2.28
scNanoCT&ATAC-seq	H3K4me3	ATAC	GM12878-H3K4me3-1#16_12	138539380	37044	3739.9	36868	36365	29326	98.6357	4.17766	27693	13918	2.358	27337	2740	3.117
scNanoCT&ATAC-seq	H3K4me3	ATAC	GM12878-H3K4me3-1#16_2	55528584	15914	3489.3	15743	15495	12620	98.4247	1.64148	11059	8473	2.559	11983	2508	3.887
scNanoCT&ATAC-seq	H3K4me3	ATAC	GM12878-H3K4me3-1#16_3	84361206	32131	2625.5	31951	31542	26885	98.7199	2.46581	24703	14404	1.472	25374	3225	2.848
scNanoCT&ATAC-seq	H3K4me3	ATAC	GM12878-H3K4me3-1#16_4	153193089	49392	3101.6	49199	48239	41102	98.0487	4.53086	39848	20801	1.938	36484	4119	2.312
scNanoCT&ATAC-seq	H3K4me3	ATAC	GM12878-H3K4me3-1#16_5	171952909	46178	3723.7	46029	45239	37036	98.2837	5.1702	36130	20473	1.913	33012	3900	2.853
scNanoCT&ATAC-seq	H3K4me3	ATAC	GM12878-H3K4me3-1#16_6	214009857	62076	3447.5	61743	60703	48100	98.3156	6.37897	44895	19966	1.847	44212	3473	2.48
scNanoCT&ATAC-seq	H3K4me3	ATAC	GM12878-H3K4me3-1#16_7	199821167	57296	3487.5	56963	56217	44631	98.6904	5.98551	41867	19614	2.388	41997	3470	2.388
scNanoCT&ATAC-seq	H3K4me3	ATAC	GM12878-H3K4me3-1#16_8	311455912	82694	3766.4	82360	81213	63844	98.6073	9.41564	55878	31947	2.349	61709	7785	2.831
scNanoCT&ATAC-seq	H3K4me3	ATAC	GM12878-H3K4me3-1#16_9	80548018	23719	3395.9	23172	22765	18488	98.2436	2.38826	15813	10070	3.019	18227	2552	3.903
scNanoCT&ATAC-seq	H3K4me3	ATAC	GM12878-H3K4me3-1#9_1	111541004	33361	3343.5	33110	32300	26306	97.5536	3.28489	24231	13714	2.311	24827	3010	3.259
scNanoCT&ATAC-seq	H3K4me3	ATAC	GM12878-H3K4me3-1#9_10	347602102	92283	3766.7	91709	90256	70293	98.4156	10.4628	68345	40370	2.157	62830	8028	2.537
scNanoCT&ATAC-seq	H3K4me3	ATAC	GM12878-H3K4me3-1#9_11	362607092	99464	3645.6	98959	97489	73647	98.5145	10.9096	74455	35694	2.108	63552	6515	2.096
scNanoCT&ATAC-seq	H3K4me3	ATAC	GM12878-H3K4me3-1#9_12	256819968	70616	3636.9	70279	69131	52771	98.3665	7.70656	54562	26727	1.936	44168	3892	2.135
scNanoCT&ATAC-seq	H3K4me3	ATAC	GM12878-H3K4me3-1#9_2	333388970	89712	3716.2	89188	87570	67670	98.1859	9.97451	59285	30198	2.088	67196	6365	2.231
scNanoCT&ATAC-seq	H3K4me3	ATAC	GM12878-H3K4me3-1#9_3	121698625	45038	2702.1	44708	44035	36175	98.4947	3.55453	33415	17017	1.467	33808	4199	2.231
scNanoCT&ATAC-seq	H3K4me3	ATAC	GM12878-H3K4me3-1#9_4	168633620	51464	3276.7	51225	50471	41693	98.5281	5.03108	38117	21524	2.052	40123	4872	2.429
scNanoCT&ATAC-seq	H3K4me3	ATAC	GM12878-H3K4me3-1#9_5	192301873	49530	3882.5	49319	48542	38127	98.4245	5.80783	40813	16461	2.515	30630	2107	2.222
scNanoCT&ATAC-seq	H3K4me3	ATAC	GM12878-H3K4me3-1#9_6	218007969	62015	3515.4	60828	59759	44889	98.2426	6.48745	44496	19754	2.188	39148	3287	2.695
scNanoCT&ATAC-seq	H3K4me3	ATAC	GM12878-H3K4me3-1#9_7	330510215	94098	3512.4	93119	91922	68575	98.7145	9.8928	66473	34880	2.383	59309	6480	2.469
scNanoCT&ATAC-seq	H3K4me3	ATAC	GM12878-H3K4me3-1#9_8	273357564	70060	3901.8	69697	68488	51507	98.2653	8.23712	51150	28032	2.566	44411	4761	2.606
scNanoCT&ATAC-seq	H3K4me3	ATAC	GM12878-H3K4me3-1#9_9	306984727	97884	3136.2	85142	83609	63939	98.1995	9.04297	62109	33852	1.908	58018	7295	2.516
scNanoCT&ATAC-seq	H3K4me3	ATAC	GM12878-H3K4me3-2#25_1	261304346	57294	4560.8	56962	56039	50787	98.3796	7.94806	53795	24484	2.535	41851	3516	3.563
scNanoCT&ATAC-seq	H3K4me3	ATAC	GM12878-H3K4me3-2#25_10	132750839	27042	4909.1	26889	26430	23236	98.293	4.03667	23908	11390	4.437	20213	1942	3.54
scNanoCT&ATAC-seq	H3K4me3	ATAC	GM12878-H3K4me3-2#25_11	131187612	27312	4803.3	27097	26632	23310	98.2839	3.98328	24626	12503	3.79	19108	1791	3.423
scNanoCT&ATAC-seq	H3K4me3	ATAC	GM12878-H3K4me3-2#25_12	185916529	38862	4784	38673	38204	33640	98.7873	5.70102	35826	18253	3.772	27759	2658	3.832
scNanoCT&ATAC-seq	H3K4me3	ATAC	GM12878-H3K4me3-2#25_2	194837753	40261	4839.4	40010	39380	35213	98.4254	5.93643	35804	20106	3.746	30185	3554	3.472
scNanoCT&ATAC-seq	H3K4me3	ATAC	GM12878-H3K4me3-2#25_3	33537268	8692	3858.4	8619	8457	8069	98.1204	0.99516	8661	4099	3.019	6398	603	3.409
scNanoCT&ATAC-seq	H3K4me3	ATAC	GM12878-H3K4me3-2#25_4	119314011	25719	4639.1	25576	25233	22998	98.6589	3.63986	23210	12958	3.841	19881	1745	4.276
scNanoCT&ATAC-seq	H3K4me3	ATAC	GM12878-H3K4me3-2#25_5	136453569	27792	4909.8	27634	27107	24214	98.0929	4.14847	26690	12514	2.974	19148	1738	3.566
scNanoCT&ATAC-seq	H3K4me3	ATAC	GM12878-H3K4me3-2#25_6	135910652	32677	4159.2	31274	30638	28140	97.9664	4.06115	26476	13268	3.269	26342	2701	4.009
scNanoCT&ATAC-seq	H3K4me3	ATAC	GM12878-H3K4me3-2#25_7	424316149	87180	4867.1	86520	85341	75008	98.6373	12.9735	84593	33229	2.757	56771	3485	3.024
scNanoCT&ATAC-seq	H3K4me3	ATAC	GM12878-H3K4me3-2#25_8	165544154	33858	4889.4	33663	33132	29257	98.4226	5.05643	27520	16774	4.083	27477	3599	4.422
scNanoCT&ATAC-seq	H3K4me3	ATAC	GM12878-H3K4me3-2#25_9	160514135	32679	4911.8	32374	31880	28080	98.4741	4.89097	30440	15531	3.11	22087	2211	2.951
scNanoCT&ATAC-seq	H3K4me3	ATAC	GM12878-H3K4me3-2#26_1	138846553	29225	4751	29018	28422	25336	97.9461	4.19923	26037	13050	3.518	21596	2044	4.111
scNanoCT&ATAC-seq	H3K4me3	ATAC	GM12878-H3K4me3-2#26_10	180289202	35536	5073.4	35348	34737	29945	98.2715	5.50495	32486	15348	3.493	23894	1963	4.041
scNanoCT&ATAC-seq	H3K4me3	ATAC	GM12878-H3K4me3-2#26_11	520082156	102634	5067.3	102064	100332	85570	98.303	15.9246	87938	37948	2.95	73299	3746	2.339
scNanoCT&ATAC-seq	H3K4me3	ATAC	GM12878-H3K4me3-2#26_12	220456151	43602	5056.1	43367	42758	36952	98.5957	6.76307	36190	18647	3.356	33101	3282	3.281
scNanoCT&ATAC-seq	H3K4me3	ATAC	GM12878-H3K4me3-2#26_2	258293782	54335	4753.7	53444	52582	46599	98.3871	7.85966	45807	25720	3.661	41981	4653	3.522
scNanoCT&ATAC-seq	H3K4me3	ATAC	GM12878-H3K4me3-2#26_3	64339281	15949	4034.1	15813	15526	14468	98.185	1.92501	14560	7301	3.361	12266	1246	3.393
scNanoCT&ATAC-seq	H3K4me3	ATAC	GM12878-H3K4me3-2#26_4	88782613	18016	4928	17915	17633	15956	98.4259	2.70052	12756	7781	5.329	17128	2616	5.446
scNanoCT&ATAC-seq	H3K4me3	ATAC	GM12878-H3K4me3-2#26_5	192444546	37343	5153.4	37130	36298	31863	97.7592	5.84772	31735	15781	4.665	27824	3482	3.976
scNanoCT&ATAC-seq	H3K4me3	ATAC	GM12878-H3K4me3-2#26_6	257021597	51078	5031.9	50083	49151	41991	98.1391	7.81218	34663	18696	3.729	44287	5296	3.55
scNanoCT&ATAC-seq	H3K4me3	ATAC	GM12878-H3K4me3-2#26_7	255004063	50123	5087.6	49699	48917	42066	98.4265	7.78271	35365	15898	4.396	43177	3392	4.067
scNanoCT&ATAC-seq	H3K4me3	ATAC	GM12878-H3K4me3-2#26_8	339217840	66995	5063.3	66580	65624	56344	98.5641	10.414	57566	30356	3.249	48779	4711	3.517
scNanoCT&ATAC-seq	H3K4me3	ATAC	GM12878-H3K4me3-2#26_9	238743955	46530	5131	46138	45310	38740	98.2054	7.27549	40007	21167	3.767	32734	3575	3.403
scNanoCT&ATAC-seq	H3K4me3	ATAC	GM12878-H3K4me3-2#27_1	229830617	46240	4970.4	45894	45316	39612	98.7406	7.0431	42131	20606	3.48	32306	2502	4.035
scNanoCT&ATAC-seq	H3K4me3	ATAC	GM12878-H3K4me3-2#27_10	468075767	87809	5330.6	87392	85002	72753	97.2652	14.2312	74206	33760	3.88	61834	2804	2.547
scNanoCT&ATAC-seq	H3K4me3	ATAC	GM12878-H3K4me3-2#27_11	342877786	65484	5236.1	65018	63859	54648	98.2174	10.4938	56668	33518	3.448	44932	5351	4.693
scNanoCT&ATAC-seq	H3K4me3	ATAC	GM12878-H3K4me3-2#27_12	317519685	61127	5194.4	60795	59931	51743	98.5788	9.76142	55944	26334	3.87	41119	3377	4.207
scNanoCT&ATAC-seq	H3K4me3	ATAC	GM12878-H3K4me3-2#27_2	457283053	88115	5189.6	87200	85244	73906	97.7569	13.9235	92359	36394	3.173	46277	1581	2.182
scNanoCT&ATAC-seq	H3K4me3	ATAC	GM12878-H3K4me3-2#27_3	161066904	36712	4387.3	36483	35901	32338	98.4047	4.88998	33850	14061	2.427	26540	2348	2.67
scNanoCT&ATAC-seq	H3K4me3	ATAC	GM12878-H3K4me3-2#27_4	451001640	86595	5208.2	86170	84651	73794	98.2372	13.8418	71678	34084	2.876	66448	6177	3.138
scNanoCT&ATAC-seq	H3K4me3	ATAC	GM12878-H3K4me3-2#27_5	237608533	45294	5245.9	45026	44279	38654	98.341	7.28937	36763	19298	2.968	35772	3200	3.497
scNanoCT&ATAC-seq	H3K4me3	ATAC	GM12878-H3K4me3-2#27_6	302670698	66119	4577.7	61352	60261	52541	98.2217	9.13226	50492	26747	3.479	47537	4109	3.815
scNanoCT&ATAC-seq	H3K4me3	ATAC	GM12878-H3K4me3-2#27_7	179364459	35960	4987.9	35599	35088	31318	98.5646	5.4566	32274	14768	3.529	26417	2566	3.352
scNanoCT&ATAC-seq	H3K4me3	ATAC	GM12878-H3K4me3-2#27_8	258027257	49893	5171.6	49482	48733	41709	98.4863	7.92349	46611	19006	3.522	31857	2279	2.833
scNanoCT&ATAC-seq	H3K4me3	ATAC	GM12878-H3K4me3-2#27_9	266017311	51261	5189.5	50891	50037	43070	98.3219	8.14332	44387	22633	3.088	36545	4063	3.327
scNanoCT&ATAC-seq	H3K4me3	ATAC	GM12878-H3K4me3-2#28_1	227256541	44251	5135.6	43906	43174	37099	98.3328	6.93119	35769	18932	3.634	33641	3411	3.078
scNanoCT&ATAC-seq	H3K4me3	ATAC	GM12878-H3K4me3-2#28_10	263210301	48969	5375	48666	47776	40495	98.1712	8.05485	44578	20119	3.788	31841	2731	3.448
scNanoCT&ATAC-seq	H3K4me3	ATAC	GM12878-H3K4me3-2#28_11	290433027	54254	5353.2	53838	52851	44420	98.1667	8.87562	42941	21562	3.817	40318	4215	3.787
scNanoCT&ATAC-seq	H3K4me3	ATAC	GM12878-H3K4me3-2#28_12	40608070	9533	4259.7	9446	9311	8774	98.5708	1.20834	8976	3935	4.075	7556	634	5.472
scNanoCT&ATAC-seq	H3K4me3	ATAC	GM12878-H3K4me3-2#28_2	240507413	44627	5389.3	44301	43539	37126	98.2799	7.3593	37972	16914	4.679	31579	2814	3.89
scNanoCT&ATAC-seq	H3K4me3	ATAC	GM12878-H3K4me3-2#28_3	160351386	35700	4491.6	35454	34866	31005	98.3415	4.86789	29489	15946	3.406	28170	3104	3.938
scNanoCT&ATAC-seq	H3K4me3	ATAC	GM12878-H3K4me3-2#28_4	298738082	57079	5233.8	56783	55930	48420	98.4978	9.18632	49684	24048	4.021	40791	3013	3.972
scNanoCT&ATAC-seq	H3K4me3	ATAC	GM12878-H3K4me3-2#28_5	517109366	97389	5309.7	96948	95466	81159	98.4713	15.9255	87595	40480	3.332	65182	5848	3.382
scNanoCT&ATAC-seq	H3K4me3	ATAC	GM12878-H3K4me3-2#28_6	327665683	63307	5175.8	61408	60343	50882	98.2657	9.99389	54499	24531	2.96	41037	3566	3.003
scNanoCT&ATAC-seq	H3K4me3	ATAC	GM12878-H3K4me3-2#28_7	452400448	92248	4904.2	89741	87751	74092	97.7825	13.7122	79280	24965	3.026	60071	3529	2.035
scNanoCT&ATAC-seq	H3K4me3	ATAC	GM12878-H3K4me3-2#28_8	221512300	41532	5333.5	41260	40666	34639	98.5603	6.79316	37279	18994	3.743	27494	3134	4.068
scNanoCT&ATAC-seq	H3K4me3	ATAC	GM12878-H3K4me3-2#28_9	348913465	65915	5293.4	65056	64054	54332	98.4598	10.6979	63368	26245	3.185	38350	2845	3.761
scNanoCT&ATAC-seq	H3K4me3	ATAC	GM12878-H3K4me3-2#29_1	112966457	23085	4893.5	22917	22511	20613	98.2284	3.44781	19536	9493	3.227	19085	1769	4.284
scNanoCT&ATAC-seq	H3K4me3	ATAC	GM12878-H3K4me3-2#29_10	170090162	33650	5054.7	33456	32856	29512	98.2066	5.20255	29592	14267	3.482	26073	2645	3.38
scNanoCT&ATAC-seq	H3K4me3	ATAC	GM12878-H3K4me3-2#29_11	106151290	20939	5069.5	20737	20448	18365	98.6064	3.24682	19830	11458	3.424	14486	1814	5.454
scNanoCT&ATAC-seq	H3K4me3	ATAC	GM12878-H3K4me3-2#29_12	172253297	34850	4942.7	34674	34062	30805	98.235	5.26651	30567	16014	3.161	27419	3007	2.729
scNanoCT&ATAC-seq	H3K4me3	ATAC	GM12878-H3K4me3-2#29_2	163162252	32486	5022.5	32239	31735	28880	98.4367	4.99267	33356	11394	4.06	20866	1807	3.951
scNanoCT&ATAC-seq	H3K4me3	ATAC	GM12878-H3K4me3-2#29_3	45196575	10423	4336.2	10325	10124	9534	98.0533	1.36179	9833	5075	3.235	7895	687	3.025
scNanoCT&ATAC-seq	H3K4me3	ATAC	GM12878-H3K4me3-2#29_4	114530640	22666	5053	22540	22135	20355	98.2032	3.51248	18835	9146	2.824	19223	1782	2.455
scNanoCT&ATAC-seq	H3K4me3	ATAC	GM12878-H3K4me3-2#29_5	148089206	28787	5144.3	28603	28113	25548	98.2869	4.54594	23191	11093	3.904	24953	2278	3.567
scNanoCT&ATAC-seq	H3K4me3	ATAC	GM12878-H3K4me3-2#29_6	24850944	10565	2352.2	5252	4972	4949	94.6687	0.648325	4856	2382	4.145	4075	400	2.847
scNanoCT&ATAC-seq	H3K4me3	ATAC	GM12878-H3K4me3-2#29_7	134334159	26333	5101.4	26091	25602	23151	98.1258	4.0934	23321	10056	3.631	19868	1749	4.565
scNanoCT&ATAC-seq	H3K4me3	ATAC	GM12878-H3K4me3-2#29_8	191354757	37784	5064.4	37548	36811	33027	98.0372	5.85012	30908	15603	3.319	30974	2844	3.603
scNanoCT&ATAC-seq	H3K4me3	ATAC	GM12878-H3K4me3-2#29_9	148521763	30446	4878.2	29295	28638	25995	97.7573	4.49434	24875	12942	3.584	23440	2449	2.804
scNanoCT&ATAC-seq	H3K4me3	ATAC	GM12878-H3K4me3-2#30_1	149330929	29965	4983.5	29747	29281	26204	98.4335	4.56963	26477	13988	2.71	22717	2223	3.96
scNanoCT&ATAC-seq	H3K4me3	ATAC	GM12878-H3K4me3-2#30_10	105906231	20109	5266.6	19979	19659	17448	98.3983	3.2428	12669	7779	5.081	19651	3191	6.165
scNanoCT&ATAC-seq	H3K4me3	ATAC	GM12878-H3K4me3-2#30_11	262988370	50738	5183.3	50327	49579	43262	98.5137	8.07043	43145	24658	3.972	38000	4690	3.789
scNanoCT&ATAC-seq	H3K4me3	ATAC	GM12878-H3K4me3-2#30_12	152513287	31842	4789.7	31659	31122	27653	98.3038	4.65346	28175	13484	3.611	23660	2358	3.112
scNanoCT&ATAC-seq	H3K4me3	ATAC	GM12878-H3K4me3-2#30_2	183076725	35739	5122.6	35315	34603	30629	97.9839	5.56404	33017	12824	3.713	24517	1515	3.121
scNanoCT&ATAC-seq	H3K4me3	ATAC	GM12878-H3K4me3-2#30_3	74738849	17536	4262	17381	17099	15858	98.3775	2.25439	15001	8853	3.26	14503	1545	3.437
scNanoCT&ATAC-seq	H3K4me3	ATAC	GM12878-H3K4me3-2#30_4	150781568	29423	5124.6	29252	28820	25847	98.5232	4.63288	28543	12912	3.225	20148	1617	3.892
scNanoCT&ATAC-seq	H3K4me3	ATAC	GM12878-H3K4me3-2#30_5	172478044	33332	5174.5	33110	32643	28811	98.5895	5.28896	30862	13692	3.414	23222	1923	3.219
scNanoCT&ATAC-seq	H3K4me3	ATAC	GM12878-H3K4me3-2#30_6	99510713	26169	3802.6	21512	21050	19773	97.8524	2.93449	19486	8281	2.759	17547	1489	3.382
scNanoCT&ATAC-seq	H3K4me3	ATAC	GM12878-H3K4me3-2#30_7	236301695	45418	5202.8	45053	44304	39161	98.3375	7.22667	37612	18388	3.405	35569	3973	3.583
scNanoCT&ATAC-seq	H3K4me3	ATAC	GM12878-H3K4me3-2#30_8	289585025	56368	5137.4	55975	55253	48181	98.7101	8.91543	53708	26358	3.746	36842	2686	4.539
scNanoCT&ATAC-seq	H3K4me3	ATAC	GM12878-H3K4me3-2#30_9	233214522	47650	4894.3	46476	45759	40746	98.4573	7.12325	44009	24965	3.167	32172	3209	3.681
scNanoCT&ATAC-seq	H3K4me3	ATAC	GM12878-H3K4me3-2#31_1	154789452	32054	4829	31834	31306	28518	98.3414	4.72542	27906	16284	4.059	25167	2960	4.116
scNanoCT&ATAC-seq	H3K4me3	ATAC	GM12878-H3K4me3-2#31_10	115490655	22697	5088.4	22565	22236	19885	98.542	3.53768	20774	10225	4.207	16836	1643	3.843
scNanoCT&ATAC-seq	H3K4me3	ATAC	GM12878-H3K4me3-2#31_11	248027860	50045	4956.1	49682	48977	43581	98.581	7.58485	46039	22345	3.557	36091	3566	3.425
scNanoCT&ATAC-seq	H3K4me3	ATAC	GM12878-H3K4me3-2#31_12	142819336	29408	4856.5	29216	28712	25827	98.2749	4.35855	24635	12268	3.139	23997	2499	3.159
scNanoCT&ATAC-seq	H3K4me3	ATAC	GM12878-H3K4me3-2#31_2	191020532	38346	4981.5	37979	37408	33783	98.4965	5.8409	33011	17634	3.328	30198	3022	3.825
scNanoCT&ATAC-seq	H3K4me3	ATAC	GM12878-H3K4me3-2#31_3	53113583	12917	4111.9	12772	12518	11770	98.0113	1.59121	12468	6031	3.155	9365	746	3.273
scNanoCT&ATAC-seq	H3K4me3	ATAC	GM12878-H3K4me3-2#31_4	150242001	29926	5020.5	29755	29291	26785	98.4406	4.59911	25690	11382	3.266	24454	2455	3.836
scNanoCT&ATAC-seq	H3K4me3	ATAC	GM12878-H3K4me3-2#31_5	126928793	25191	5038.7	25045	24580	22371	98.1433	3.87694	21785	10994	3.64	20482	1945	2.875
scNanoCT&ATAC-seq	H3K4me3	ATAC	GM12878-H3K4me3-2#31_6	68488033	18133	3777	15175	14833	14158	97.7463	2.01194	13525	6141	2.852	12990	1338	3.797
scNanoCT&ATAC-seq	H3K4me3	ATAC	GM12878-H3K4me3-2#31_7	130735979	26132	5002.9	25657	25249	22805	98.4098	3.96645	21684	10682	4.165	21072	1947	3.384
scNanoCT&ATAC-seq	H3K4me3	ATAC	GM12878-H3K4me3-2#31_8	238794393	50795	4701.1	48705	47843	42964	98.2302	7.26112	42371	18442	3.076	38533	2197	2.451
scNanoCT&ATAC-seq	H3K4me3	ATAC	GM12878-H3K4me3-2#31_9	153554844	31055	4944.6	30425	29965	27056	98.4881	4.67212	30063	13433	2.921	20550	1652	3.635
scNanoCT&ATAC-seq	H3K4me3	ATAC	GM12878-H3K4me3-2#32_1	51723289	12293	4207.5	12210	12017	11187	98.4193	1.55569	11377	5313	2.823	9611	863	4.659
scNanoCT&ATAC-seq	H3K4me3	ATAC	GM12878-H3K4me3-2#32_10	318700022	61945	5144.9	61641	60793	52380	98.6243	9.7897	54910	25945	3.844	44105	3664	3.499
scNanoCT&ATAC-seq	H3K4me3	ATAC	GM12878-H3K4me3-2#32_11	206112216	40235	5122.7	39856	39201	34143	98.3566	6.29425	31985	18853	3.86	32179	3622	2.99
scNanoCT&ATAC-seq	H3K4me3	ATAC	GM12878-H3K4me3-2#32_12	169503124	32924	5148.3	32742	32225	27809	98.421	5.19515	31206	13996	3.922	21267	1494	3.178
scNanoCT&ATAC-seq	H3K4me3	ATAC	GM12878-H3K4me3-2#32_2	194485643	39012	4985.3	38440	37831	33123	98.4157	5.93184	31688	17883	3.483	30534	3650	3.221
scNanoCT&ATAC-seq	H3K4me3	ATAC	GM12878-H3K4me3-2#32_3	39203727	9072	4321.4	8981	8787	8188	97.8399	1.17067	6195	3550	6.191	8512	1159	4.704
scNanoCT&ATAC-seq	H3K4me3	ATAC	GM12878-H3K4me3-2#32_4	323411810	64327	5027.6	64034	62588	55145	97.7418	9.85343	64089	21755	2.499	39823	2718	2.36
scNanoCT&ATAC-seq	H3K4me3	ATAC	GM12878-H3K4me3-2#32_5	168382323	33289	5058.2	32661	32187	28390	98.5487	5.17117	31180	14501	3.562	22376	1937	3.541
scNanoCT&ATAC-seq	H3K4me3	ATAC	GM12878-H3K4me3-2#32_6	86195105	16638	5180.6	16153	15862	14213	98.1985	2.60347	13058	6619	7.83	13434	1853	7.168
scNanoCT&ATAC-seq	H3K4me3	ATAC	GM12878-H3K4me3-2#32_7	215846899	42604	5066.4	42066	41411	36093	98.4429	6.58349	36640	17781	3.911	30877	2886	3.696
scNanoCT&ATAC-seq	H3K4me3	ATAC	GM12878-H3K4me3-2#32_8	277873849	53529	5191.1	53188	52489	45669	98.6858	8.55106	46342	23862	3.776	39804	3157	3.657
scNanoCT&ATAC-seq	H3K4me3	ATAC	GM12878-H3K4me3-2#32_9	230933358	44881	5145.5	44165	43491	38134	98.4739	7.06682	37159	21908	3.953	34094	3923	3.516
scNanoCT&ATAC-seq	H3K4me3	ATAC	GM12878-H3K4me3-3#1_1	161417695	47015	3433.3	46627	45792	40648	98.2092	4.81094	43009	22263	2.846	32101	3526	3.414
scNanoCT&ATAC-seq	H3K4me3	ATAC	GM12878-H3K4me3-3#1_10	182981495	45859	3990.1	45090	44133	39084	97.8776	5.50271	39828	22698	2.741	32470	3806	3.149
scNanoCT&ATAC-seq	H3K4me3	ATAC	GM12878-H3K4me3-3#1_11	258640730	71082	3638.6	70387	69055	60550	98.1076	7.75001	60764	36837	3.007	51027	7199	4.822
scNanoCT&ATAC-seq	H3K4me3	ATAC	GM12878-H3K4me3-3#1_12	99985730	26474	3776.8	26241	25698	22613	97.9307	2.99325	16060	10554	5.197	24373	4350	5.914
scNanoCT&ATAC-seq	H3K4me3	ATAC	GM12878-H3K4me3-3#1_2	360785799	95380	3782.6	94601	92798	81039	98.0941	10.8416	82563	39464	2.242	67841	5429	2.917
scNanoCT&ATAC-seq	H3K4me3	ATAC	GM12878-H3K4me3-3#1_3	78790151	30795	2558.5	30538	29854	27372	97.7602	2.27228	26775	15207	2.333	23712	2946	3.274
scNanoCT&ATAC-seq	H3K4me3	ATAC	GM12878-H3K4me3-3#1_4	167715611	42730	3925	42410	41572	37284	98.0241	5.04578	36494	19872	3.134	32245	3550	2.917
scNanoCT&ATAC-seq	H3K4me3	ATAC	GM12878-H3K4me3-3#1_5	144167658	38351	3759.2	38124	37473	32939	98.2924	4.33494	28468	18345	2.924	31092	4408	4.052
scNanoCT&ATAC-seq	H3K4me3	ATAC	GM12878-H3K4me3-3#1_6	280221851	75238	3724.5	74644	73130	63965	97.9717	8.38382	64877	40276	3.389	52959	7267	5.059
scNanoCT&ATAC-seq	H3K4me3	ATAC	GM12878-H3K4me3-3#1_7	266442711	72532	3673.5	70482	69330	60366	98.3655	7.99995	59669	32074	3.01	51757	6095	3.433
scNanoCT&ATAC-seq	H3K4me3	ATAC	GM12878-H3K4me3-3#1_8	236918900	63118	3753.6	62671	61367	53591	97.9193	7.11803	50533	27651	2.793	48090	5192	3.257
scNanoCT&ATAC-seq	H3K4me3	ATAC	GM12878-H3K4me3-3#1_9	150889199	40581	3718.2	39539	38722	33715	97.9337	4.48911	30462	16595	3.919	29707	3068	4.701
scNanoCT&ATAC-seq	H3K4me3	ATAC	GM12878-H3K4me3-3#2_1	186682306	52613	3548.2	52271	51192	45502	97.9358	5.57791	43425	22824	3.17	41186	4502	3.561
scNanoCT&ATAC-seq	H3K4me3	ATAC	GM12878-H3K4me3-3#2_10	201835392	49356	4089.4	49079	48110	42365	98.0256	6.10287	39154	19249	3.442	39430	3542	3.741
scNanoCT&ATAC-seq	H3K4me3	ATAC	GM12878-H3K4me3-3#2_11	214511630	56083	3824.9	55680	54563	47810	97.9939	6.44243	43065	26154	2.706	46317	5865	3.822
scNanoCT&ATAC-seq	H3K4me3	ATAC	GM12878-H3K4me3-3#2_12	180200749	47045	3830.4	46763	45811	40176	97.9642	5.40837	36701	22796	3.399	37569	4970	4.737
scNanoCT&ATAC-seq	H3K4me3	ATAC	GM12878-H3K4me3-3#2_2	192878034	48445	3981.4	48104	47300	41664	98.3286	5.824	40067	24669	3.147	37520	5183	4.422
scNanoCT&ATAC-seq	H3K4me3	ATAC	GM12878-H3K4me3-3#2_3	54994460	20811	2642.6	20649	20241	18665	98.0241	1.59807	19625	11541	2.487	14865	1861	3.874
scNanoCT&ATAC-seq	H3K4me3	ATAC	GM12878-H3K4me3-3#2_4	226794078	57400	3951.1	57073	55758	49895	97.6959	6.82308	46195	28854	3.299	44939	6453	4.251
scNanoCT&ATAC-seq	H3K4me3	ATAC	GM12878-H3K4me3-3#2_5	236213772	57798	4086.9	57498	56393	49829	98.0782	7.13126	50490	27606	2.675	41921	4685	3.459
scNanoCT&ATAC-seq	H3K4me3	ATAC	GM12878-H3K4me3-3#2_6	411276599	109713	3748.7	109057	106781	93412	97.913	12.3327	88445	44522	3.105	85233	7327	3.606
scNanoCT&ATAC-seq	H3K4me3	ATAC	GM12878-H3K4me3-3#2_7	314476533	82492	3812.2	81845	80381	69949	98.2113	9.46671	66621	43980	3.029	62654	9976	4.934
scNanoCT&ATAC-seq	H3K4me3	ATAC	GM12878-H3K4me3-3#2_8	243036149	63755	3812	63355	62240	54384	98.2401	7.31868	53416	33030	2.999	47179	6324	4.014
scNanoCT&ATAC-seq	H3K4me3	ATAC	GM12878-H3K4me3-3#2_9	237729146	62192	3822.5	61506	60259	52816	97.9726	7.11416	51860	26950	2.822	45622	4199	4.309
scNanoCT&ATAC-seq	H3K4me3	ATAC	GM12878-H3K4me3-3#3_1	173635221	46673	3720.2	46178	45024	40304	97.501	5.15289	41445	21382	2.46	32851	3177	3.712
scNanoCT&ATAC-seq	H3K4me3	ATAC	GM12878-H3K4me3-3#3_10	169500256	41233	4110.8	40773	39889	35261	97.8319	5.08821	36785	18527	4.15	28262	2774	3.673
scNanoCT&ATAC-seq	H3K4me3	ATAC	GM12878-H3K4me3-3#3_11	119129501	44274	2690.7	43442	41735	36514	96.0706	3.37174	28669	8561	2.463	39803	1481	3.473
scNanoCT&ATAC-seq	H3K4me3	ATAC	GM12878-H3K4me3-3#3_12	291489470	75623	3854.5	75050	73652	64815	98.1372	8.77985	61828	36465	3.032	57842	6880	4.886
scNanoCT&ATAC-seq	H3K4me3	ATAC	GM12878-H3K4me3-3#3_2	1759439055	499618	3521.6	495948	481217	417504	97.0297	52.0831	404034	72275	1.01	379257	3710	1.024
scNanoCT&ATAC-seq	H3K4me3	ATAC	GM12878-H3K4me3-3#3_3	61263959	22847	2681.5	22561	22017	20329	97.5888	1.76513	20233	11012	2.392	16956	1834	3.944
scNanoCT&ATAC-seq	H3K4me3	ATAC	GM12878-H3K4me3-3#3_4	158349452	39483	4010.6	39123	38460	34455	98.3053	4.78194	32916	16457	3.202	30964	2890	3.571
scNanoCT&ATAC-seq	H3K4me3	ATAC	GM12878-H3K4me3-3#3_5	139968136	33412	4189.2	33104	32452	28895	98.0304	4.2119	29971	16565	4.021	23396	2306	4.391
scNanoCT&ATAC-seq	H3K4me3	ATAC	GM12878-H3K4me3-3#3_6	217160585	58652	3702.5	58002	56871	49865	98.0501	6.48267	45518	25467	2.916	46047	5284	3.653
scNanoCT&ATAC-seq	H3K4me3	ATAC	GM12878-H3K4me3-3#3_7	306215927	81960	3736.2	80712	79224	69015	98.1564	9.1527	66251	41995	3.28	59701	8561	4.79
scNanoCT&ATAC-seq	H3K4me3	ATAC	GM12878-H3K4me3-3#3_8	308711440	77759	3970.1	77121	75649	66067	98.0913	9.3024	65099	34612	2.563	57290	6207	3.183
scNanoCT&ATAC-seq	H3K4me3	ATAC	GM12878-H3K4me3-3#3_9	296800818	75506	3930.8	74416	73160	64328	98.3122	8.92419	68265	41228	3.004	50521	6119	4.434
scNanoCT&ATAC-seq	H3K4me3	ATAC	GM12878-H3K4me3-3#4_1	187442072	52256	3587	51842	50977	45676	98.3315	5.61907	47590	23762	2.635	36915	3430	3.01
scNanoCT&ATAC-seq	H3K4me3	ATAC	GM12878-H3K4me3-3#4_10	236394773	59457	3975.9	59134	58039	51442	98.1483	7.14191	50120	31665	3.058	45989	6563	3.705
scNanoCT&ATAC-seq	H3K4me3	ATAC	GM12878-H3K4me3-3#4_11	278979263	73822	3779.1	73238	72090	63407	98.4325	8.39632	66316	36568	3.451	50098	5286	4.884
scNanoCT&ATAC-seq	H3K4me3	ATAC	GM12878-H3K4me3-3#4_12	286320108	72598	3943.9	72249	70944	62972	98.1937	8.66338	64967	36255	3.136	52242	6786	3.596
scNanoCT&ATAC-seq	H3K4me3	ATAC	GM12878-H3K4me3-3#4_2	245572730	61860	3969.8	61408	60018	53051	97.7365	7.37611	51656	28625	2.839	46868	5264	3.274
scNanoCT&ATAC-seq	H3K4me3	ATAC	GM12878-H3K4me3-3#4_3	65154687	24184	2694.1	23981	23540	21702	98.161	1.8939	21257	13052	2.552	18747	2579	4.051
scNanoCT&ATAC-seq	H3K4me3	ATAC	GM12878-H3K4me3-3#4_4	247521904	63511	3897.3	63146	61990	55984	98.1693	7.47992	60648	30779	2.969	42655	4375	3.53
scNanoCT&ATAC-seq	H3K4me3	ATAC	GM12878-H3K4me3-3#4_5	302370190	76069	3974.9	75310	73824	65618	98.0268	9.12582	57793	36490	2.635	63948	6774	3.343
scNanoCT&ATAC-seq	H3K4me3	ATAC	GM12878-H3K4me3-3#4_6	267371974	73262	3649.5	72754	71409	62817	98.1513	8.01067	59894	31059	2.612	57177	6795	3.248
scNanoCT&ATAC-seq	H3K4me3	ATAC	GM12878-H3K4me3-3#4_7	97064693	23934	4055.5	23359	22843	20333	97.791	2.89887	12786	7417	4.765	24172	3925	7.744
scNanoCT&ATAC-seq	H3K4me3	ATAC	GM12878-H3K4me3-3#4_8	201272542	54791	3673.5	54456	53598	47439	98.4244	6.06132	45891	24942	3.084	42364	4383	4.125
scNanoCT&ATAC-seq	H3K4me3	ATAC	GM12878-H3K4me3-3#4_9	311889829	79419	3927.1	78813	77146	68214	97.8849	9.36752	72424	45455	2.969	55170	7732	4.759
scNanoCT&ATAC-seq	H3K4me3	ATAC	GM12878-H3K4me3-3#5_1	152425099	41648	3659.8	41222	40444	36082	98.1127	4.54906	35038	22689	2.722	32040	4455	3.971
scNanoCT&ATAC-seq	H3K4me3	ATAC	GM12878-H3K4me3-3#5_10	225569460	54848	4112.6	54462	53380	46897	98.0133	6.80837	45796	25258	3.171	40943	5009	3.364
scNanoCT&ATAC-seq	H3K4me3	ATAC	GM12878-H3K4me3-3#5_11	313821116	83730	3748	82801	81202	70999	98.0689	9.38637	76658	44277	3.006	54671	5994	4.206
scNanoCT&ATAC-seq	H3K4me3	ATAC	GM12878-H3K4me3-3#5_12	52980781	15155	3495.9	14950	14776	13094	98.8361	1.57664	13152	7227	2.772	11367	1432	4.505
scNanoCT&ATAC-seq	H3K4me3	ATAC	GM12878-H3K4me3-3#5_2	224447445	56173	3995.6	55480	54439	47813	98.1236	6.73969	49290	25786	2.507	39033	3612	3.216
scNanoCT&ATAC-seq	H3K4me3	ATAC	GM12878-H3K4me3-3#5_3	55815182	20579	2712.2	20368	20002	18403	98.2031	1.62482	18791	11550	2.735	14746	2082	5.433
scNanoCT&ATAC-seq	H3K4me3	ATAC	GM12878-H3K4me3-3#5_4	152675892	38565	3958.9	38271	37561	33624	98.1448	4.60266	34731	19101	3.066	27578	3380	3.829
scNanoCT&ATAC-seq	H3K4me3	ATAC	GM12878-H3K4me3-3#5_5	234863590	57506	4084.2	57103	55996	49590	98.0614	7.09227	51131	26148	2.617	40405	4065	2.901
scNanoCT&ATAC-seq	H3K4me3	ATAC	GM12878-H3K4me3-3#5_6	315595913	82796	3811.7	82124	80524	70251	98.0517	9.46987	64984	39906	3.069	64458	8492	3.991
scNanoCT&ATAC-seq	H3K4me3	ATAC	GM12878-H3K4me3-3#5_7	117419172	32610	3600.7	29818	28962	25364	97.1293	3.43143	21197	14475	3.854	25199	4031	6.072
scNanoCT&ATAC-seq	H3K4me3	ATAC	GM12878-H3K4me3-3#5_8	245750841	62696	3919.7	62162	60971	53381	98.084	7.39926	59562	28274	2.754	38872	3426	3.438
scNanoCT&ATAC-seq	H3K4me3	ATAC	GM12878-H3K4me3-3#5_9	210138373	53704	3912.9	52890	51839	45500	98.0129	6.27507	47461	28359	3.199	36402	5188	4.639
scNanoCT&ATAC-seq	H3K4me3	ATAC	GM12878-H3K4me3-3#6_1	203159181	55121	3685.7	54649	53689	47762	98.2433	6.07704	51594	28875	2.707	36714	4154	3.251
scNanoCT&ATAC-seq	H3K4me3	ATAC	GM12878-H3K4me3-3#6_10	276274271	68567	4029.3	68097	67020	58961	98.4184	8.36072	58646	35013	3.259	51059	6301	3.837
scNanoCT&ATAC-seq	H3K4me3	ATAC	GM12878-H3K4me3-3#6_11	203710718	54781	3718.6	54236	53323	46574	98.3166	6.10337	50766	26347	2.703	35294	3138	3.336
scNanoCT&ATAC-seq	H3K4me3	ATAC	GM12878-H3K4me3-3#6_12	176059515	45732	3849.8	45399	44489	39267	97.9956	5.29528	41163	22926	2.757	31737	3974	3.729
scNanoCT&ATAC-seq	H3K4me3	ATAC	GM12878-H3K4me3-3#6_2	198561097	49600	4003.2	48998	48206	42495	98.3836	5.9836	44345	22735	3.275	33917	3525	3.737
scNanoCT&ATAC-seq	H3K4me3	ATAC	GM12878-H3K4me3-3#6_3	73751903	28424	2594.7	28149	27581	25296	97.9822	2.13246	23378	15090	2.599	23420	3234	3.941
scNanoCT&ATAC-seq	H3K4me3	ATAC	GM12878-H3K4me3-3#6_4	235557183	59979	3927.3	59565	58607	52464	98.3917	7.11469	48109	28668	2.836	48712	5042	3.275
scNanoCT&ATAC-seq	H3K4me3	ATAC	GM12878-H3K4me3-3#6_5	227834286	56414	4038.6	56027	54870	48713	97.9349	6.86069	45038	26545	2.645	45462	4080	3.365
scNanoCT&ATAC-seq	H3K4me3	ATAC	GM12878-H3K4me3-3#6_6	278326922	72936	3816	72158	70870	61616	98.215	8.35133	61035	34394	2.873	53271	6631	3.744
scNanoCT&ATAC-seq	H3K4me3	ATAC	GM12878-H3K4me3-3#6_7	177191078	45334	3908.6	44785	43843	38201	97.8966	5.29272	38868	21291	3.461	30976	3328	4.21
scNanoCT&ATAC-seq	H3K4me3	ATAC	GM12878-H3K4me3-3#6_8	257871117	65313	3948.2	64844	63572	55426	98.0384	7.76222	50309	28190	2.905	52795	5511	2.935
scNanoCT&ATAC-seq	H3K4me3	ATAC	GM12878-H3K4me3-3#6_9	236534087	61079	3872.6	60102	59113	51784	98.3545	7.10475	56329	32481	3.198	39558	4582	3.774
scNanoCT&ATAC-seq	H3K4me3	ATAC	GM12878-H3K4me3-3#7_1	138663834	36587	3790	36297	35733	31796	98.4462	4.16454	35429	19469	3.001	23934	2764	4.047
scNanoCT&ATAC-seq	H3K4me3	ATAC	GM12878-H3K4me3-3#7_10	252561437	61462	4109.2	61082	59984	52728	98.2024	7.62746	52598	28603	2.877	45415	5170	3.662
scNanoCT&ATAC-seq	H3K4me3	ATAC	GM12878-H3K4me3-3#7_11	322964388	82174	3930.3	81595	79724	69429	97.707	9.69873	72051	47067	3.261	56213	8283	4.486
scNanoCT&ATAC-seq	H3K4me3	ATAC	GM12878-H3K4me3-3#7_12	215840883	53499	4034.5	53168	52294	46135	98.3562	6.53885	46640	27164	3.33	39555	5016	4.179
scNanoCT&ATAC-seq	H3K4me3	ATAC	GM12878-H3K4me3-3#7_2	341782284	84845	4028.3	84104	82589	72342	98.1987	10.3192	68270	41042	2.718	65503	7505	3.648
scNanoCT&ATAC-seq	H3K4me3	ATAC	GM12878-H3K4me3-3#7_3	93153708	34413	2706.9	34159	33532	30641	98.1645	2.71743	30028	18408	2.457	26608	3328	3.574
scNanoCT&ATAC-seq	H3K4me3	ATAC	GM12878-H3K4me3-3#7_4	189186562	47934	3946.8	47602	46681	41666	98.0652	5.70284	37900	18648	2.71	39300	3171	2.949
scNanoCT&ATAC-seq	H3K4me3	ATAC	GM12878-H3K4me3-3#7_5	208902395	50408	4144.2	49842	49062	43372	98.4351	6.32378	46455	23421	2.47	34731	2913	3.274
scNanoCT&ATAC-seq	H3K4me3	ATAC	GM12878-H3K4me3-3#7_6	244144266	62380	3913.8	61669	60342	52725	97.8482	7.30056	46169	29139	3.265	51298	6717	4.064
scNanoCT&ATAC-seq	H3K4me3	ATAC	GM12878-H3K4me3-3#7_7	198999689	52178	3813.9	51284	50274	43739	98.0306	5.94541	42464	21936	3.538	38108	3593	4.009
scNanoCT&ATAC-seq	H3K4me3	ATAC	GM12878-H3K4me3-3#7_8	179019039	44015	4067.2	43705	42831	37608	98.0002	5.39313	36308	21855	3.314	33297	4455	3.527
scNanoCT&ATAC-seq	H3K4me3	ATAC	GM12878-H3K4me3-3#7_9	268908244	68993	3897.6	67776	66389	58134	97.9536	8.0571	61497	41748	3.156	46565	7432	5.06
scNanoCT&ATAC-seq	H3K4me3	ATAC	GM12878-H3K4me3-3#8_1	182074773	50022	3639.9	49586	48665	43780	98.1426	5.43451	46966	25985	2.449	34672	3777	3.381
scNanoCT&ATAC-seq	H3K4me3	ATAC	GM12878-H3K4me3-3#8_10	242118124	59536	4066.8	59196	58062	51826	98.0843	7.31738	47071	28813	3.582	49043	5898	3.811
scNanoCT&ATAC-seq	H3K4me3	ATAC	GM12878-H3K4me3-3#8_11	277033624	73380	3775.3	72751	71354	63513	98.0798	8.31382	62093	40410	2.8	55572	7746	4.262
scNanoCT&ATAC-seq	H3K4me3	ATAC	GM12878-H3K4me3-3#8_12	183535205	46206	3972.1	45917	45086	40425	98.1902	5.53509	40623	21377	3.388	34280	4217	3.5
scNanoCT&ATAC-seq	H3K4me3	ATAC	GM12878-H3K4me3-3#8_2	261651269	65252	4009.9	64705	63294	56518	97.8193	7.8612	53956	36496	3.354	50397	6840	4.314
scNanoCT&ATAC-seq	H3K4me3	ATAC	GM12878-H3K4me3-3#8_3	59567207	22555	2641	22360	21930	20361	98.0769	1.73072	19654	12069	2.427	17693	2441	3.291
scNanoCT&ATAC-seq	H3K4me3	ATAC	GM12878-H3K4me3-3#8_4	120076065	30089	3990.7	29847	29274	26524	98.0802	3.61235	26167	15259	3.793	22829	2433	3.592
scNanoCT&ATAC-seq	H3K4me3	ATAC	GM12878-H3K4me3-3#8_5	174530004	43549	4007.7	43172	42334	37966	98.0589	5.25523	39775	19880	2.923	30238	2727	3.689
scNanoCT&ATAC-seq	H3K4me3	ATAC	GM12878-H3K4me3-3#8_6	198722418	51604	3850.9	51077	50190	44480	98.2634	5.9577	45496	24716	2.965	36649	4080	4.09
scNanoCT&ATAC-seq	H3K4me3	ATAC	GM12878-H3K4me3-3#8_7	176384635	46195	3818.3	45350	44380	39335	97.8611	5.25835	38034	21601	3.623	34344	3839	3.94
scNanoCT&ATAC-seq	H3K4me3	ATAC	GM12878-H3K4me3-3#8_8	625288549	183919	3399.8	182912	177517	155417	97.0505	18.4727	129951	27515	1.457	162283	1682	1.092
scNanoCT&ATAC-seq	H3K4me3	ATAC	GM12878-H3K4me3-3#8_9	212472283	54166	3922.6	53560	52548	46537	98.1105	6.37316	48868	27946	2.732	37060	4556	3.414
scNanoCT&ATAC-seq	H3K4me3	ATAC	GM12878-H3K4me3-4#10_1	275193534	74727	3682.7	74108	72713	63180	98.1176	8.23768	59511	37741	2.922	56191	7679	3.727
scNanoCT&ATAC-seq	H3K4me3	ATAC	GM12878-H3K4me3-4#10_10	313658216	75601	4148.9	75114	73975	63871	98.4836	9.51186	54888	34289	3.459	63443	8283	3.451
scNanoCT&ATAC-seq	H3K4me3	ATAC	GM12878-H3K4me3-4#10_11	335299218	83576	4011.9	82819	81193	69279	98.0367	10.0931	65138	39279	2.884	62523	8578	3.339
scNanoCT&ATAC-seq	H3K4me3	ATAC	GM12878-H3K4me3-4#10_12	251883605	64681	3894.2	64182	62899	54203	98.001	7.5715	57853	31474	2.555	42112	4412	2.702
scNanoCT&ATAC-seq	H3K4me3	ATAC	GM12878-H3K4me3-4#10_2	429422381	108716	3949.9	107685	105224	90447	97.7146	12.8698	99476	34631	2.786	68820	4536	2.977
scNanoCT&ATAC-seq	H3K4me3	ATAC	GM12878-H3K4me3-4#10_3	96625807	36902	2618.4	36562	35955	32599	98.3398	2.8079	32893	19039	2.623	27203	3211	3.875
scNanoCT&ATAC-seq	H3K4me3	ATAC	GM12878-H3K4me3-4#10_4	309230606	76855	4023.6	76267	74776	65931	98.045	9.32419	68086	40932	2.691	53459	6763	3.678
scNanoCT&ATAC-seq	H3K4me3	ATAC	GM12878-H3K4me3-4#10_5	107694588	27059	3980	26813	26295	23007	98.0681	3.22007	21886	17201	3.833	20365	3637	4.82
scNanoCT&ATAC-seq	H3K4me3	ATAC	GM12878-H3K4me3-4#10_6	168385385	43290	3889.7	42275	41406	35330	97.9444	5.0168	25344	18837	3.161	39802	7249	5.744
scNanoCT&ATAC-seq	H3K4me3	ATAC	GM12878-H3K4me3-4#10_7	235310256	60226	3907.1	58970	57916	49540	98.2127	7.05835	50353	26782	2.97	40823	4259	3.558
scNanoCT&ATAC-seq	H3K4me3	ATAC	GM12878-H3K4me3-4#10_8	351346538	88552	3967.7	87924	86159	73904	97.9926	10.5833	71802	43850	2.873	65149	8449	3.775
scNanoCT&ATAC-seq	H3K4me3	ATAC	GM12878-H3K4me3-4#10_9	256394761	66611	3849.1	64797	63609	54746	98.1666	7.67673	55620	32603	2.642	45565	5412	3.788
scNanoCT&ATAC-seq	H3K4me3	ATAC	GM12878-H3K4me3-4#11_1	16973937	7525	2255.7	7419	7250	7109	97.7221	0.489788	6901	4138	2.531	6552	815	3.928
scNanoCT&ATAC-seq	H3K4me3	ATAC	GM12878-H3K4me3-4#11_10	19281243	8205	2349.9	8131	7984	7810	98.1921	0.561634	7814	3841	1.915	7094	748	4.525
scNanoCT&ATAC-seq	H3K4me3	ATAC	GM12878-H3K4me3-4#11_11	21874243	10823	2021.1	10668	10427	10116	97.7409	0.626017	9584	5411	2.966	9497	1149	4.78
scNanoCT&ATAC-seq	H3K4me3	ATAC	GM12878-H3K4me3-4#11_12	19335789	9123	2119.5	9033	8830	8617	97.7527	0.556794	8225	4919	2.733	8132	1154	4.536
scNanoCT&ATAC-seq	H3K4me3	ATAC	GM12878-H3K4me3-4#11_2	24991733	11308	2210.1	11153	10909	10647	97.8122	0.7212	10528	5626	2.297	9458	1132	3.717
scNanoCT&ATAC-seq	H3K4me3	ATAC	GM12878-H3K4me3-4#11_3	10873133	5758	1888.4	5696	5599	5510	98.2971	0.308804	5281	3025	2.525	4957	692	7.143
scNanoCT&ATAC-seq	H3K4me3	ATAC	GM12878-H3K4me3-4#11_4	16787066	6835	2456	6750	6615	6485	98	0.492769	6388	3371	2.196	5971	565	3.182
scNanoCT&ATAC-seq	H3K4me3	ATAC	GM12878-H3K4me3-4#11_5	19166254	8235	2327.4	8179	7996	7847	97.7626	0.55484	7542	4872	2.309	7732	1071	4.554
scNanoCT&ATAC-seq	H3K4me3	ATAC	GM12878-H3K4me3-4#11_6	8870484	4544	1952.1	4456	4341	4222	97.4192	0.250093	3684	2545	4.217	4372	870	8.264
scNanoCT&ATAC-seq	H3K4me3	ATAC	GM12878-H3K4me3-4#11_7	15279577	7618	2005.7	7384	7228	7035	97.8873	0.43386	6952	3926	3.084	6329	798	3.735
scNanoCT&ATAC-seq	H3K4me3	ATAC	GM12878-H3K4me3-4#11_8	11704022	5290	2212.5	5200	5087	4977	97.8269	0.33328	4963	2736	2.958	4512	493	6.352
scNanoCT&ATAC-seq	H3K4me3	ATAC	GM12878-H3K4me3-4#12_1	203185345	55992	3628.8	55485	54464	47854	98.1599	6.06238	43037	20125	2.697	45710	3636	3.909
scNanoCT&ATAC-seq	H3K4me3	ATAC	GM12878-H3K4me3-4#12_10	317141965	76838	4127.4	76359	74947	65297	98.1508	9.57554	63870	35988	2.927	56975	6318	3.396
scNanoCT&ATAC-seq	H3K4me3	ATAC	GM12878-H3K4me3-4#12_11	351450459	88980	3949.8	88259	87025	75273	98.6018	10.6361	83822	42203	2.96	55928	5308	3.876
scNanoCT&ATAC-seq	H3K4me3	ATAC	GM12878-H3K4me3-4#12_12	211806007	53526	3957.1	53114	52288	45438	98.4449	6.40347	45878	24896	3.4	38574	4459	4.17
scNanoCT&ATAC-seq	H3K4me3	ATAC	GM12878-H3K4me3-4#12_2	159739447	39176	4077.5	38749	38049	33201	98.1935	4.79908	34981	18860	4.039	26188	2927	4.535
scNanoCT&ATAC-seq	H3K4me3	ATAC	GM12878-H3K4me3-4#12_3	56617305	21061	2688.3	20865	20392	18802	97.733	1.63442	18463	11648	2.686	16036	2317	4.063
scNanoCT&ATAC-seq	H3K4me3	ATAC	GM12878-H3K4me3-4#12_4	164681428	41092	4007.6	40787	39951	35590	97.9503	4.9501	37543	20949	2.587	27949	3129	3.215
scNanoCT&ATAC-seq	H3K4me3	ATAC	GM12878-H3K4me3-4#12_5	248083932	59729	4153.5	59310	58287	51017	98.2752	7.50542	53147	29014	2.619	41522	4819	3.535
scNanoCT&ATAC-seq	H3K4me3	ATAC	GM12878-H3K4me3-4#12_6	323511938	82092	3940.8	81430	80136	68401	98.4109	9.74553	67930	36400	3.16	57535	6084	3.986
scNanoCT&ATAC-seq	H3K4me3	ATAC	GM12878-H3K4me3-4#12_7	275049743	71490	3847.4	68710	67342	57979	98.009	8.22962	62250	31803	2.943	43165	5080	3.449
scNanoCT&ATAC-seq	H3K4me3	ATAC	GM12878-H3K4me3-4#12_8	222309048	55305	4019.7	54900	53686	46525	97.7887	6.68216	43918	26528	3.19	41643	5065	3.75
scNanoCT&ATAC-seq	H3K4me3	ATAC	GM12878-H3K4me3-4#12_9	238924006	62039	3851.2	60403	59464	51884	98.4454	7.17956	55966	34127	3.2	39435	5343	3.863
scNanoCT&ATAC-seq	H3K4me3	ATAC	GM12878-H3K4me3-4#13_1	200600571	56406	3556.4	55973	54759	47435	97.8311	5.96905	46545	26867	2.794	41600	5320	3.774
scNanoCT&ATAC-seq	H3K4me3	ATAC	GM12878-H3K4me3-4#13_10	280882749	68196	4118.8	67807	66062	56421	97.4265	8.41507	56233	30011	3	47222	4699	3.861
scNanoCT&ATAC-seq	H3K4me3	ATAC	GM12878-H3K4me3-4#13_11	258264377	68500	3770.3	67845	66288	56303	97.7051	7.70245	56262	33345	2.393	48755	4718	2.825
scNanoCT&ATAC-seq	H3K4me3	ATAC	GM12878-H3K4me3-4#13_12	317098657	84733	3742.3	84209	82960	70486	98.5168	9.56563	73181	40856	2.375	57375	7190	3.032
scNanoCT&ATAC-seq	H3K4me3	ATAC	GM12878-H3K4me3-4#13_2	370304854	98807	3747.8	98133	96093	82002	97.9212	11.0766	85555	36675	2.021	67479	5025	2.726
scNanoCT&ATAC-seq	H3K4me3	ATAC	GM12878-H3K4me3-4#13_3	88015917	34605	2543.4	34315	33567	30222	97.8202	2.54416	28589	15721	2.534	27256	3188	3.673
scNanoCT&ATAC-seq	H3K4me3	ATAC	GM12878-H3K4me3-4#13_4	107740579	26847	4013.1	26606	26066	22840	97.9704	3.23007	13695	8601	5.706	27468	4870	6.041
scNanoCT&ATAC-seq	H3K4me3	ATAC	GM12878-H3K4me3-4#13_5	251241551	60460	4155.5	60047	58787	50696	97.9016	7.56877	52029	28858	2.96	42369	5055	3.913
scNanoCT&ATAC-seq	H3K4me3	ATAC	GM12878-H3K4me3-4#13_6	257620343	68558	3757.7	66027	64729	54164	98.0341	7.69563	54987	28532	3.48	45066	4757	4.064
scNanoCT&ATAC-seq	H3K4me3	ATAC	GM12878-H3K4me3-4#13_7	179472510	47876	3748.7	46724	45816	38886	98.0567	5.3554	33813	23546	3.773	36895	6060	5.799
scNanoCT&ATAC-seq	H3K4me3	ATAC	GM12878-H3K4me3-4#13_8	450774965	116350	3874.3	115617	114049	96948	98.6438	13.6482	111753	57369	2.839	68004	5648	3.021
scNanoCT&ATAC-seq	H3K4me3	ATAC	GM12878-H3K4me3-4#13_9	309072553	82623	3740.8	78612	76970	65517	97.9113	9.22665	66751	36175	2.775	53821	6014	3.31
scNanoCT&ATAC-seq	H3K4me3	ATAC	GM12878-H3K4me3-4#14_1	193557100	56936	3399.6	56524	55634	48751	98.4254	5.78802	45614	26367	2.63	44393	4595	3.335
scNanoCT&ATAC-seq	H3K4me3	ATAC	GM12878-H3K4me3-4#14_10	580677484	148524	3909.7	147695	145310	125553	98.3852	17.6075	120696	69968	3.342	115029	14470	4.077
scNanoCT&ATAC-seq	H3K4me3	ATAC	GM12878-H3K4me3-4#14_11	327172182	83000	3941.8	82419	80945	69782	98.2116	9.88396	74956	43421	3.436	53594	6593	4.495
scNanoCT&ATAC-seq	H3K4me3	ATAC	GM12878-H3K4me3-4#14_12	267271787	68303	3913	67859	66596	57327	98.1388	8.06391	54882	30289	2.804	51304	6125	3.642
scNanoCT&ATAC-seq	H3K4me3	ATAC	GM12878-H3K4me3-4#14_2	360529054	92707	3888.9	91845	90466	77845	98.4986	10.9015	77822	46613	3.084	65738	7088	3.706
scNanoCT&ATAC-seq	H3K4me3	ATAC	GM12878-H3K4me3-4#14_3	94360081	35937	2625.7	35676	34996	31692	98.094	2.74012	32037	17875	2.464	26172	3112	3.845
scNanoCT&ATAC-seq	H3K4me3	ATAC	GM12878-H3K4me3-4#14_4	241263250	62438	3864	62021	60902	53543	98.1958	7.27324	50478	29620	2.712	48168	5569	3.312
scNanoCT&ATAC-seq	H3K4me3	ATAC	GM12878-H3K4me3-4#14_5	229824099	58034	3960.2	57688	56530	49059	97.9927	6.92151	50027	27610	2.765	40717	4694	3.073
scNanoCT&ATAC-seq	H3K4me3	ATAC	GM12878-H3K4me3-4#14_6	303792159	78008	3894.4	77479	76055	64504	98.1621	9.15462	62540	33444	2.799	56995	6113	3.195
scNanoCT&ATAC-seq	H3K4me3	ATAC	GM12878-H3K4me3-4#14_7	259419920	69318	3742.5	67349	65967	56490	97.948	7.76032	53721	34038	3.327	49393	6847	4.091
scNanoCT&ATAC-seq	H3K4me3	ATAC	GM12878-H3K4me3-4#14_8	225366234	56333	4000.6	55949	54929	47223	98.1769	6.80166	49393	25133	3.14	38059	4315	4.283
scNanoCT&ATAC-seq	H3K4me3	ATAC	GM12878-H3K4me3-4#14_9	302124807	76563	3946.1	75642	74155	64268	98.0342	9.08727	63779	44335	3.185	55181	9328	5.028
scNanoCT&ATAC-seq	H3K4me3	ATAC	GM12878-H3K4me3-4#15_1	174466129	48435	3602.1	48003	46866	40755	97.6314	5.18043	43347	25502	3.033	32179	3894	4.267
scNanoCT&ATAC-seq	H3K4me3	ATAC	GM12878-H3K4me3-4#15_10	304330650	75157	4049.3	74649	73539	63393	98.513	9.22029	65614	40470	3.516	50623	5544	3.841
scNanoCT&ATAC-seq	H3K4me3	ATAC	GM12878-H3K4me3-4#15_11	664124997	177719	3736.9	176431	173468	147192	98.3206	19.9872	161460	68787	2.498	114290	11202	3.26
scNanoCT&ATAC-seq	H3K4me3	ATAC	GM12878-H3K4me3-4#15_12	248557626	65532	3792.9	65060	63824	54566	98.1002	7.47373	54560	30824	2.695	46222	5470	3.104
scNanoCT&ATAC-seq	H3K4me3	ATAC	GM12878-H3K4me3-4#15_2	350200178	89863	3897	89107	87348	74575	98.026	10.5173	76444	39614	2.628	61347	6507	3.032
scNanoCT&ATAC-seq	H3K4me3	ATAC	GM12878-H3K4me3-4#15_3	63039004	23849	2643.3	23585	23055	21050	97.7528	1.8193	22180	11721	3.005	16437	1969	4.093
scNanoCT&ATAC-seq	H3K4me3	ATAC	GM12878-H3K4me3-4#15_4	207875157	52378	3968.7	51995	51119	44784	98.3152	6.2816	48248	25231	2.496	34291	3267	3.379
scNanoCT&ATAC-seq	H3K4me3	ATAC	GM12878-H3K4me3-4#15_5	208521188	53730	3880.9	53341	52345	45434	98.1328	6.26042	44082	30222	3.387	40008	5445	5.039
scNanoCT&ATAC-seq	H3K4me3	ATAC	GM12878-H3K4me3-4#15_6	423588085	112820	3754.5	111778	109133	91575	97.6337	12.6426	83091	49820	2.581	85192	11250	4.171
scNanoCT&ATAC-seq	H3K4me3	ATAC	GM12878-H3K4me3-4#15_7	328785161	87111	3774.3	86220	84663	71505	98.1942	9.84007	70699	43107	2.859	60635	7740	4.031
scNanoCT&ATAC-seq	H3K4me3	ATAC	GM12878-H3K4me3-4#15_9	400325251	111263	3598	109973	107803	91888	98.0268	11.9498	98987	48016	1.722	71497	5299	2.223
scNanoCT&ATAC-seq	H3K4me3	ATAC	GM12878-H3K4me3-4#16_1	167255372	46230	3617.9	45800	44288	39082	96.6987	4.91277	37993	20678	3.746	33571	3652	4.158
scNanoCT&ATAC-seq	H3K4me3	ATAC	GM12878-H3K4me3-4#16_10	248139194	59863	4145.1	59458	57930	50091	97.4301	7.44559	47562	21880	3.657	44994	3847	3.04
scNanoCT&ATAC-seq	H3K4me3	ATAC	GM12878-H3K4me3-4#16_11	286241579	77179	3708.8	76389	74625	64370	97.6908	8.53561	59787	41819	3.026	59677	8864	4.322
scNanoCT&ATAC-seq	H3K4me3	ATAC	GM12878-H3K4me3-4#16_12	272286781	71602	3802.8	71109	69752	60641	98.0917	8.19348	57839	34844	3.635	55258	7068	4.372
scNanoCT&ATAC-seq	H3K4me3	ATAC	GM12878-H3K4me3-4#16_2	220345501	55359	3980.3	54874	53860	46559	98.1521	6.6147	47778	25617	2.717	38413	3773	3.02
scNanoCT&ATAC-seq	H3K4me3	ATAC	GM12878-H3K4me3-4#16_3	50791869	19218	2642.9	18997	18541	17157	97.5996	1.45721	16954	8750	3.267	13852	1484	4.239
scNanoCT&ATAC-seq	H3K4me3	ATAC	GM12878-H3K4me3-4#16_4	282271666	71423	3952.1	70936	69287	61026	97.6754	8.47483	56148	31507	2.852	56097	7331	3.6
scNanoCT&ATAC-seq	H3K4me3	ATAC	GM12878-H3K4me3-4#16_5	1012531050	259221	3906.1	257839	252976	219619	98.1139	30.5872	226954	96440	2.495	183217	17619	2.502
scNanoCT&ATAC-seq	H3K4me3	ATAC	GM12878-H3K4me3-4#16_6	234663485	58904	3983.8	58462	57108	48765	97.684	7.01315	49211	24788	3.119	40811	3677	3.305
scNanoCT&ATAC-seq	H3K4me3	ATAC	GM12878-H3K4me3-4#16_8	289833411	72480	3998.8	71968	70514	60616	97.9797	8.71747	55978	31401	3.201	55950	5897	3.686
scNanoCT&ATAC-seq	H3K4me3	ATAC	GM12878-H3K4me3-4#16_9	326249537	87594	3724.6	83900	82331	71054	98.1299	9.76668	72723	46255	2.958	57994	7864	3.814
scNanoCT&ATAC-seq	H3K4me3	ATAC	GM12878-H3K4me3-4#9_1	241389185	67989	3550.4	67475	66108	57041	97.9741	7.19951	56821	32223	2.517	48348	5799	3.571
scNanoCT&ATAC-seq	H3K4me3	ATAC	GM12878-H3K4me3-4#9_10	347898969	85395	4074	84902	82739	70320	97.4524	10.4537	63335	33030	2.717	67124	6609	2.939
scNanoCT&ATAC-seq	H3K4me3	ATAC	GM12878-H3K4me3-4#9_11	235684967	58687	4016	58183	57091	48444	98.1232	7.10813	50712	28477	3.255	38816	4637	3.984
scNanoCT&ATAC-seq	H3K4me3	ATAC	GM12878-H3K4me3-4#9_12	183156879	45825	3996.9	45484	44551	37871	97.9487	5.52339	29137	18070	4.426	40579	5937	4.469
scNanoCT&ATAC-seq	H3K4me3	ATAC	GM12878-H3K4me3-4#9_2	367126888	93273	3936	92545	91042	76631	98.3759	11.0766	73617	47413	3.402	63358	9885	4.49
scNanoCT&ATAC-seq	H3K4me3	ATAC	GM12878-H3K4me3-4#9_3	32060349	11617	2759.8	11448	10968	10007	95.8071	0.901582	7554	4572	3.888	10179	1605	6.677
scNanoCT&ATAC-seq	H3K4me3	ATAC	GM12878-H3K4me3-4#9_4	204898572	51005	4017.2	50595	49702	43118	98.235	6.1882	42675	23589	2.72	36188	4072	3.259
scNanoCT&ATAC-seq	H3K4me3	ATAC	GM12878-H3K4me3-4#9_5	295874560	76716	3856.8	76314	74954	64489	98.2179	8.92669	63279	41104	2.881	55924	6383	3.473
scNanoCT&ATAC-seq	H3K4me3	ATAC	GM12878-H3K4me3-4#9_6	317176058	80636	3933.4	79842	78267	65575	98.0274	9.53099	64267	36730	2.478	56678	6908	3.407
scNanoCT&ATAC-seq	H3K4me3	ATAC	GM12878-H3K4me3-4#9_7	57974199	16573	3498.1	16017	15569	13336	97.203	1.67783	13462	8701	3.2	11038	1638	4.331
scNanoCT&ATAC-seq	H3K4me3	ATAC	GM12878-H3K4me3-4#9_8	168299438	42021	4005.1	41472	40733	34749	98.2181	5.07112	36175	20960	4.019	27178	3008	4.851
scNanoCT&ATAC-seq	H3K4me3	ATAC	GM12878-H3K4me3-4#9_9	239186069	61947	3861.1	61407	60200	51041	98.0344	7.16757	48871	27265	2.833	44991	5327	3.655
scNanoCT&ATAC-seq	H3K27ac	ATAC	GM12878-H3K27ac-1#10_1	263659386	57646	4573.8	57382	55904	52795	97.4243	7.9834	47575	16479	2.606	52730	5934	5.285
scNanoCT&ATAC-seq	H3K27ac	ATAC	GM12878-H3K27ac-1#10_10	163697830	34354	4765	34217	33380	31687	97.5538	4.98429	23049	10146	2.787	37164	5283	5.863
scNanoCT&ATAC-seq	H3K27ac	ATAC	GM12878-H3K27ac-1#10_11	140813091	29737	4735.3	29599	28725	27257	97.0472	4.25627	16912	6499	2.864	34650	4261	5.976
scNanoCT&ATAC-seq	H3K27ac	ATAC	GM12878-H3K27ac-1#10_12	675430464	145561	4640.2	145079	142028	133671	97.897	20.6091	106011	39918	2.404	148724	18519	5.513
scNanoCT&ATAC-seq	H3K27ac	ATAC	GM12878-H3K27ac-1#10_2	273272924	56685	4820.9	56423	55264	52579	97.9459	8.34415	29101	18570	2.625	70817	8735	6.374
scNanoCT&ATAC-seq	H3K27ac	ATAC	GM12878-H3K27ac-1#10_3	84042017	20666	4066.7	20527	20114	19144	97.988	2.52399	16618	8291	2.277	19513	3352	6.361
scNanoCT&ATAC-seq	H3K27ac	ATAC	GM12878-H3K27ac-1#10_4	305012500	61950	4923.5	61727	60564	57892	98.1159	9.3566	43864	19844	2.28	65909	9742	6.73
scNanoCT&ATAC-seq	H3K27ac	ATAC	GM12878-H3K27ac-1#10_5	174565341	35663	4894.9	35553	34745	33045	97.7273	5.33746	19771	10898	2.233	43083	5366	5.414
scNanoCT&ATAC-seq	H3K27ac	ATAC	GM12878-H3K27ac-1#10_6	133427468	28672	4653.6	28045	27449	25923	97.8748	4.03163	16778	9665	2.14	32268	5215	6.434
scNanoCT&ATAC-seq	H3K27ac	ATAC	GM12878-H3K27ac-1#10_7	97484289	21021	4637.5	20707	20302	19176	98.0441	2.95165	16557	8984	3.159	19397	3880	7.333
scNanoCT&ATAC-seq	H3K27ac	ATAC	GM12878-H3K27ac-1#10_8	292654041	62533	4680	61866	60938	57443	98.5	8.9931	42831	20497	2.249	66198	12230	7.227
scNanoCT&ATAC-seq	H3K27ac	ATAC	GM12878-H3K27ac-1#10_9	370571467	79849	4640.9	79147	77779	73195	98.2716	11.3252	58745	23719	2.574	80600	10211	5.399
scNanoCT&ATAC-seq	H3K27ac	ATAC	GM12878-H3K27ac-1#11_1	429230402	93646	4583.5	93303	91516	86427	98.0847	13.1368	68936	27743	2.653	95877	12233	6.021
scNanoCT&ATAC-seq	H3K27ac	ATAC	GM12878-H3K27ac-1#11_10	373182250	80297	4647.5	80079	78046	73918	97.4613	11.3203	51099	22866	2.331	89812	11689	5.229
scNanoCT&ATAC-seq	H3K27ac	ATAC	GM12878-H3K27ac-1#11_11	178849189	38550	4639.4	38397	37399	35425	97.4008	5.41451	22108	11952	2.538	45481	6415	5.339
scNanoCT&ATAC-seq	H3K27ac	ATAC	GM12878-H3K27ac-1#11_12	130983044	27717	4725.7	27594	27022	25712	97.9271	4.00658	14839	7194	2.535	34289	4512	5.846
scNanoCT&ATAC-seq	H3K27ac	ATAC	GM12878-H3K27ac-1#11_2	176716826	37723	4684.6	37540	36690	34842	97.7357	5.38699	25040	9432	2.447	41114	5216	6.364
scNanoCT&ATAC-seq	H3K27ac	ATAC	GM12878-H3K27ac-1#11_3	105579500	26092	4046.4	25977	25432	24294	97.902	3.18292	18074	8955	2.65	27994	4055	6.49
scNanoCT&ATAC-seq	H3K27ac	ATAC	GM12878-H3K27ac-1#11_4	172011314	35835	4800.1	35713	34971	33314	97.9223	5.26166	22016	10621	2.538	41211	5869	5.642
scNanoCT&ATAC-seq	H3K27ac	ATAC	GM12878-H3K27ac-1#11_5	127801704	26021	4911.5	25932	25475	24240	98.2377	3.93406	25615	10533	2.776	20477	3940	6.489
scNanoCT&ATAC-seq	H3K27ac	ATAC	GM12878-H3K27ac-1#11_6	121344517	26896	4511.6	26215	25658	24307	97.8753	3.68537	19000	9518	2.613	27099	4597	7.443
scNanoCT&ATAC-seq	H3K27ac	ATAC	GM12878-H3K27ac-1#11_7	60605005	12564	4823.7	12111	11827	11347	97.655	1.81475	4887	2927	2.601	16363	3303	8.139
scNanoCT&ATAC-seq	H3K27ac	ATAC	GM12878-H3K27ac-1#11_8	90556664	19286	4695.5	18819	18454	17461	98.0605	2.75419	11844	7718	3.033	21243	4114	8.551
scNanoCT&ATAC-seq	H3K27ac	ATAC	GM12878-H3K27ac-1#11_9	140716599	30991	4540.6	30499	29981	28353	98.3016	4.28765	18711	9983	2.68	35208	5432	7.023
scNanoCT&ATAC-seq	H3K27ac	ATAC	GM12878-H3K27ac-1#12_1	410046088	87161	4704.5	86789	85382	81407	98.3788	12.6067	71821	32440	2.641	83051	15708	7.295
scNanoCT&ATAC-seq	H3K27ac	ATAC	GM12878-H3K27ac-1#12_10	121779840	25201	4832.3	25108	24638	23587	98.1281	3.73559	16091	8053	3.056	28688	4712	6.631
scNanoCT&ATAC-seq	H3K27ac	ATAC	GM12878-H3K27ac-1#12_11	123191844	26364	4672.7	26257	25782	24565	98.191	3.77391	18060	9634	2.261	28656	4730	7.539
scNanoCT&ATAC-seq	H3K27ac	ATAC	GM12878-H3K27ac-1#12_12	79967587	16543	4833.9	16463	16176	15526	98.2567	2.44911	7558	4922	3.508	21831	3573	6.585
scNanoCT&ATAC-seq	H3K27ac	ATAC	GM12878-H3K27ac-1#12_2	275681761	57973	4755.3	57719	56638	54031	98.1271	8.45332	40864	17686	2.575	61874	8123	6.167
scNanoCT&ATAC-seq	H3K27ac	ATAC	GM12878-H3K27ac-1#12_3	52701601	13603	3874.3	13547	13289	12761	98.0955	1.59119	11132	6384	2.1	12971	2710	8.518
scNanoCT&ATAC-seq	H3K27ac	ATAC	GM12878-H3K27ac-1#12_4	147284166	28947	5088.1	28858	28216	27121	97.7753	4.52476	23526	9398	2.91	27896	4608	8.573
scNanoCT&ATAC-seq	H3K27ac	ATAC	GM12878-H3K27ac-1#12_5	80886587	15761	5132.1	15709	15302	14698	97.4091	2.45894	8273	5431	3.063	19453	3257	6.28
scNanoCT&ATAC-seq	H3K27ac	ATAC	GM12878-H3K27ac-1#12_6	251339081	52880	4753	52043	51282	48697	98.5377	7.71855	42899	14349	2.008	50067	7579	6.873
scNanoCT&ATAC-seq	H3K27ac	ATAC	GM12878-H3K27ac-1#12_7	187920148	40344	4657.9	39992	38986	37020	97.4845	5.71303	33066	13012	2.563	37105	6347	6.771
scNanoCT&ATAC-seq	H3K27ac	ATAC	GM12878-H3K27ac-1#12_8	96781546	21138	4578.6	20762	20190	19223	97.245	2.92049	17013	8381	2.795	19434	3358	8.135
scNanoCT&ATAC-seq	H3K27ac	ATAC	GM12878-H3K27ac-1#12_9	356754506	76574	4659	75701	74402	70714	98.284	10.9184	65663	30283	2.585	68837	12363	7.124
scNanoCT&ATAC-seq	H3K27ac	ATAC	GM12878-H3K27ac-1#13_1	82380944	17483	4712.1	17389	17090	16215	98.2805	2.51938	14150	7990	2.69	16588	3435	7.987
scNanoCT&ATAC-seq	H3K27ac	ATAC	GM12878-H3K27ac-1#13_10	429892814	102774	4182.9	102477	97970	92646	95.6019	12.7178	72491	7996	1.118	105372	1289	1.355
scNanoCT&ATAC-seq	H3K27ac	ATAC	GM12878-H3K27ac-1#13_11	186876268	39490	4732.2	39320	38396	36295	97.6501	5.68087	27337	11314	3.042	41934	5686	5.588
scNanoCT&ATAC-seq	H3K27ac	ATAC	GM12878-H3K27ac-1#13_12	106206416	22487	4723	22378	21926	20733	97.9802	3.24988	18342	9156	2.35	20859	4010	7.471
scNanoCT&ATAC-seq	H3K27ac	ATAC	GM12878-H3K27ac-1#13_2	491656933	101837	4827.9	101458	99317	93852	97.8898	15.0483	69535	31700	2.704	109049	16327	6.487
scNanoCT&ATAC-seq	H3K27ac	ATAC	GM12878-H3K27ac-1#13_3	79155478	18783	4214.2	18675	18299	17508	97.9866	2.385	12462	6510	2.44	20625	3204	5.394
scNanoCT&ATAC-seq	H3K27ac	ATAC	GM12878-H3K27ac-1#13_4	134828466	26806	5029.8	26731	26146	25007	97.8115	4.11901	17246	8994	2.731	30203	4430	7.138
scNanoCT&ATAC-seq	H3K27ac	ATAC	GM12878-H3K27ac-1#13_5	135591139	27718	4891.8	27635	27150	25800	98.245	4.16461	19772	9188	3.023	29242	4612	6.323
scNanoCT&ATAC-seq	H3K27ac	ATAC	GM12878-H3K27ac-1#13_6	648929408	138523	4684.6	137671	134613	126658	97.7788	19.7647	94667	39666	2.304	146951	20063	5.92
scNanoCT&ATAC-seq	H3K27ac	ATAC	GM12878-H3K27ac-1#13_7	183169049	39195	4673.3	38854	37985	35902	97.7634	5.57327	31756	15539	2.898	36248	6826	7.77
scNanoCT&ATAC-seq	H3K27ac	ATAC	GM12878-H3K27ac-1#13_8	152891477	31784	4810.3	31454	30732	29057	97.7046	4.64892	29263	11484	3.501	25958	3118	6.487
scNanoCT&ATAC-seq	H3K27ac	ATAC	GM12878-H3K27ac-1#13_9	156819617	32799	4781.2	32452	31583	30123	97.3222	4.72396	13560	8153	2.264	43242	5397	5.347
scNanoCT&ATAC-seq	H3K27ac	ATAC	GM12878-H3K27ac-1#14_1	107553239	22712	4735.5	22606	22179	21211	98.1111	3.29179	17487	8440	2.921	22593	3679	7.286
scNanoCT&ATAC-seq	H3K27ac	ATAC	GM12878-H3K27ac-1#14_10	266132396	55883	4762.3	55729	54698	52274	98.15	8.1658	40856	19974	2.827	58870	9231	7.014
scNanoCT&ATAC-seq	H3K27ac	ATAC	GM12878-H3K27ac-1#14_11	90588553	19641	4612.2	19542	19209	18336	98.296	2.77459	14781	9156	3.064	19999	3699	6.723
scNanoCT&ATAC-seq	H3K27ac	ATAC	GM12878-H3K27ac-1#14_2	147530901	30791	4791.4	30622	30035	28612	98.0831	4.51201	25259	9301	2.48	29201	4381	7.837
scNanoCT&ATAC-seq	H3K27ac	ATAC	GM12878-H3K27ac-1#14_3	47417050	11035	4297	10966	10790	10373	98.395	1.43983	6404	3362	2.686	13069	1796	7.502
scNanoCT&ATAC-seq	H3K27ac	ATAC	GM12878-H3K27ac-1#14_4	493240201	98600	5002.4	98302	96339	92409	98.0031	15.1763	63794	28156	2.581	112013	15333	6.546
scNanoCT&ATAC-seq	H3K27ac	ATAC	GM12878-H3K27ac-1#14_5	275420402	54940	5013.1	54790	53811	51446	98.2132	8.49115	54073	24724	2.706	43923	9525	8.795
scNanoCT&ATAC-seq	H3K27ac	ATAC	GM12878-H3K27ac-1#14_6	154799087	32918	4702.6	32240	31468	29920	97.6055	4.69604	19707	9686	2.557	37279	5566	6.015
scNanoCT&ATAC-seq	H3K27ac	ATAC	GM12878-H3K27ac-1#14_7	213713438	47773	4473.5	47317	46215	43828	97.671	6.46508	33390	14537	2.301	49837	6826	5.95
scNanoCT&ATAC-seq	H3K27ac	ATAC	GM12878-H3K27ac-1#14_8	402144702	85868	4683.3	85327	83266	79206	97.5846	12.2424	55807	24439	3.008	95343	11934	5.442
scNanoCT&ATAC-seq	H3K27ac	ATAC	GM12878-H3K27ac-1#14_9	170823909	36416	4690.9	36034	34932	33345	96.9418	5.14262	17025	8644	2.678	46371	4688	4.883
scNanoCT&ATAC-seq	H3K27ac	ATAC	GM12878-H3K27ac-1#15_1	79939646	16711	4783.7	16622	16074	15435	96.7032	2.39997	9598	5200	2.912	19749	3070	4.693
scNanoCT&ATAC-seq	H3K27ac	ATAC	GM12878-H3K27ac-1#15_10	202501966	42193	4799.4	42045	41313	39205	98.259	6.2272	31827	13696	2.484	42999	6488	6.829
scNanoCT&ATAC-seq	H3K27ac	ATAC	GM12878-H3K27ac-1#15_11	198096451	42309	4682.1	42123	41279	39032	97.9963	6.04141	29539	12148	2.518	44477	6432	5.6
scNanoCT&ATAC-seq	H3K27ac	ATAC	GM12878-H3K27ac-1#15_12	217563566	47843	4547.4	47669	46895	44508	98.3763	6.67229	35892	14791	2.831	49068	8132	7.684
scNanoCT&ATAC-seq	H3K27ac	ATAC	GM12878-H3K27ac-1#15_2	321277226	65433	4910	65139	64175	60746	98.5201	9.90023	44333	16792	2.155	71286	9298	6.565
scNanoCT&ATAC-seq	H3K27ac	ATAC	GM12878-H3K27ac-1#15_3	98962972	24052	4114.5	23923	23323	22232	97.492	2.98372	22541	8582	2.481	19677	2956	6.602
scNanoCT&ATAC-seq	H3K27ac	ATAC	GM12878-H3K27ac-1#15_4	135957011	27272	4985.2	27179	26581	25456	97.7998	4.16548	17935	7637	2.698	30226	4207	6.533
scNanoCT&ATAC-seq	H3K27ac	ATAC	GM12878-H3K27ac-1#15_5	73944247	14493	5102.1	14433	14095	13490	97.6581	2.25194	9449	4429	3.046	15973	2518	8.407
scNanoCT&ATAC-seq	H3K27ac	ATAC	GM12878-H3K27ac-1#15_6	184500454	40724	4530.5	39361	38513	36480	97.8456	5.57026	27102	13754	2.531	42499	6767	5.582
scNanoCT&ATAC-seq	H3K27ac	ATAC	GM12878-H3K27ac-1#15_7	420467681	96417	4360.9	95791	93412	87826	97.5165	12.673	76556	24155	2.326	90778	8110	4.138
scNanoCT&ATAC-seq	H3K27ac	ATAC	GM12878-H3K27ac-1#15_8	179157941	38045	4709.1	37439	36373	34449	97.1527	5.40888	25575	9409	3.137	40224	4919	6.579
scNanoCT&ATAC-seq	H3K27ac	ATAC	GM12878-H3K27ac-1#15_9	146942030	31840	4615	31324	30687	29071	97.9664	4.45593	20649	9764	2.771	34343	4834	6.598
scNanoCT&ATAC-seq	H3K27ac	ATAC	GM12878-H3K27ac-1#16_1	29136569	6645	4384.7	6534	6365	6133	97.4135	0.868839	4721	2646	2.08	6947	1293	4.05
scNanoCT&ATAC-seq	H3K27ac	ATAC	GM12878-H3K27ac-1#16_10	73420740	14851	4943.8	14811	14533	13937	98.123	2.25802	10327	5132	2.687	16115	3010	6.505
scNanoCT&ATAC-seq	H3K27ac	ATAC	GM12878-H3K27ac-1#16_11	222559993	47815	4654.6	47614	46801	44623	98.2925	6.82119	37550	15937	2.223	47769	7516	6.569
scNanoCT&ATAC-seq	H3K27ac	ATAC	GM12878-H3K27ac-1#16_12	215166686	46840	4593.7	46680	45651	43618	97.7956	6.56131	39875	15202	2.386	43316	6714	6.486
scNanoCT&ATAC-seq	H3K27ac	ATAC	GM12878-H3K27ac-1#16_2	84380874	17542	4810.2	17396	17097	16300	98.2812	2.57332	14315	7664	2.527	16491	3076	6.815
scNanoCT&ATAC-seq	H3K27ac	ATAC	GM12878-H3K27ac-1#16_3	218383269	54038	4041.3	53818	52774	50627	98.0601	6.61499	49781	18405	2.319	46639	6675	7.005
scNanoCT&ATAC-seq	H3K27ac	ATAC	GM12878-H3K27ac-1#16_4	235180455	47841	4915.9	47704	46638	44940	97.7654	7.1928	28319	12887	2.838	56973	7623	5.589
scNanoCT&ATAC-seq	H3K27ac	ATAC	GM12878-H3K27ac-1#16_5	88762823	17715	5010.6	17660	17226	16535	97.5425	2.70471	10112	6173	3.754	21361	3452	6.285
scNanoCT&ATAC-seq	H3K27ac	ATAC	GM12878-H3K27ac-1#16_6	298114986	65546	4548.2	64361	63008	59743	97.8978	9.06165	40790	19347	2.102	73064	11473	6.108
scNanoCT&ATAC-seq	H3K27ac	ATAC	GM12878-H3K27ac-1#16_7	324736308	69835	4650.1	69466	68411	64801	98.4813	9.98036	54746	20224	1.897	68870	8420	6.384
scNanoCT&ATAC-seq	H3K27ac	ATAC	GM12878-H3K27ac-1#16_8	306523016	66188	4631.1	65534	64060	61194	97.7508	9.3544	36372	17747	2.715	80448	12069	5.859
scNanoCT&ATAC-seq	H3K27ac	ATAC	GM12878-H3K27ac-1#16_9	218555154	45096	4846.4	44720	44006	41968	98.4034	6.71321	30659	11237	2.199	49357	6635	6.66
scNanoCT&ATAC-seq	H3K27ac	ATAC	GM12878-H3K27ac-1#9_10	398893630	83304	4788.4	83074	81555	76970	98.1715	12.2571	55047	22476	2.756	91924	10666	6.144
scNanoCT&ATAC-seq	H3K27ac	ATAC	GM12878-H3K27ac-1#9_11	190702860	39296	4853	39137	38061	36080	97.2507	5.77258	17094	9347	2.057	51277	5983	4.854
scNanoCT&ATAC-seq	H3K27ac	ATAC	GM12878-H3K27ac-1#9_2	159540259	33077	4823.3	32896	32021	30264	97.3401	4.85285	25439	10007	2.77	31950	4688	7.366
scNanoCT&ATAC-seq	H3K27ac	ATAC	GM12878-H3K27ac-1#9_3	80949477	20126	4022.1	20005	19639	18680	98.1705	2.45087	19482	8376	2.39	15837	2665	6.836
scNanoCT&ATAC-seq	H3K27ac	ATAC	GM12878-H3K27ac-1#9_4	442400676	88802	4981.9	88523	86593	82398	97.8198	13.5579	60275	26607	2.72	95986	14085	6.894
scNanoCT&ATAC-seq	H3K27ac	ATAC	GM12878-H3K27ac-1#9_5	182114124	37786	4819.6	37678	36884	34899	97.8927	5.57616	26784	13443	2.262	39607	6063	5.938
scNanoCT&ATAC-seq	H3K27ac	ATAC	GM12878-H3K27ac-1#9_6	124115251	26433	4695.5	25921	25483	23954	98.3103	3.79468	15777	7867	2.894	29803	4153	7.262
scNanoCT&ATAC-seq	H3K27ac	ATAC	GM12878-H3K27ac-1#9_7	232714324	51803	4492.3	51202	50128	47029	97.9024	7.06874	46794	17135	2.685	42733	5810	6.273
scNanoCT&ATAC-seq	H3K27ac	ATAC	GM12878-H3K27ac-1#9_8	154169264	32180	4790.8	31488	30677	28999	97.4244	4.67209	24158	9292	2.933	31028	4365	6.559
scNanoCT&ATAC-seq	H3K27ac	ATAC	GM12878-H3K27ac-1#9_9	207950633	43329	4799.3	42875	41886	39666	97.6933	6.32085	20448	11630	2.503	54960	7131	5.677
scNanoCT&ATAC-seq	H3K27ac	ATAC	GM12878-H3K27ac-2#17_1	217239346	45449	4779.8	45231	44366	42509	98.0876	6.65573	34234	16744	2.802	46130	8056	6.552
scNanoCT&ATAC-seq	H3K27ac	ATAC	GM12878-H3K27ac-2#17_10	145897396	28841	5058.7	28728	28046	26908	97.626	4.44701	18918	8496	2.64	32132	5006	5.995
scNanoCT&ATAC-seq	H3K27ac	ATAC	GM12878-H3K27ac-2#17_11	217626781	48474	4489.6	48162	47300	44870	98.2102	6.62424	33894	15830	1.863	51295	6347	4.951
scNanoCT&ATAC-seq	H3K27ac	ATAC	GM12878-H3K27ac-2#17_12	101344138	20164	5026	20024	19623	18800	97.9974	3.08409	10003	4753	2.622	25542	3220	5.481
scNanoCT&ATAC-seq	H3K27ac	ATAC	GM12878-H3K27ac-2#17_2	70495816	13927	5061.8	13840	13640	13077	98.5549	2.1636	11500	5886	2.762	13186	2154	7.247
scNanoCT&ATAC-seq	H3K27ac	ATAC	GM12878-H3K27ac-2#17_3	241517564	60338	4002.7	60117	58919	56381	98.0072	7.29443	45831	18662	2.242	61300	8468	6.827
scNanoCT&ATAC-seq	H3K27ac	ATAC	GM12878-H3K27ac-2#17_4	149235090	30265	4930.9	30165	29500	28394	97.7955	4.55117	19601	9179	1.806	34099	4658	5.898
scNanoCT&ATAC-seq	H3K27ac	ATAC	GM12878-H3K27ac-2#17_5	190538601	37877	5030.5	37757	36864	35402	97.6349	5.82026	19130	9095	2.248	48020	5441	4.994
scNanoCT&ATAC-seq	H3K27ac	ATAC	GM12878-H3K27ac-2#17_6	84636511	18816	4498.1	17480	17073	16296	97.6716	2.51704	13586	6465	2.561	17104	3327	7.104
scNanoCT&ATAC-seq	H3K27ac	ATAC	GM12878-H3K27ac-2#17_7	112355985	27484	4088.1	26819	26254	25032	97.8933	3.35187	20090	8547	2.883	27295	3788	5.366
scNanoCT&ATAC-seq	H3K27ac	ATAC	GM12878-H3K27ac-2#17_8	354840232	72374	4902.9	71084	69483	66226	97.7477	10.8265	44757	16774	2.94	81509	9409	6.147
scNanoCT&ATAC-seq	H3K27ac	ATAC	GM12878-H3K27ac-2#17_9	120228386	26251	4580	25046	24526	23499	97.9238	3.61657	13330	7246	3.012	31076	4622	6.623
scNanoCT&ATAC-seq	H3K27ac	ATAC	GM12878-H3K27ac-2#18_1	22213364	5497	4041	5443	5361	5139	98.4935	0.673426	3107	2242	1.921	6459	1374	7.037
scNanoCT&ATAC-seq	H3K27ac	ATAC	GM12878-H3K27ac-2#18_10	313286397	64600	4849.6	64324	62602	59824	97.3229	9.52288	71213	27995	2.454	42236	1558	2.866
scNanoCT&ATAC-seq	H3K27ac	ATAC	GM12878-H3K27ac-2#18_11	161451521	33478	4822.6	33302	32801	31107	98.4956	4.95188	29893	14235	3.004	29131	6015	7.089
scNanoCT&ATAC-seq	H3K27ac	ATAC	GM12878-H3K27ac-2#18_12	58011992	11529	5031.8	11423	11112	10683	97.2774	1.74969	4142	2979	2.848	15953	3291	6.908
scNanoCT&ATAC-seq	H3K27ac	ATAC	GM12878-H3K27ac-2#18_2	172211087	37558	4585.2	37352	36335	34883	97.2773	5.21263	20770	7177	1.42	45384	3968	3.806
scNanoCT&ATAC-seq	H3K27ac	ATAC	GM12878-H3K27ac-2#18_3	107977847	25706	4200.5	25586	25081	24082	98.0263	3.25517	18856	8673	1.925	26797	4140	6.042
scNanoCT&ATAC-seq	H3K27ac	ATAC	GM12878-H3K27ac-2#18_4	65795442	12883	5107.2	12824	12573	12150	98.0427	2.01621	8789	4830	2.557	14116	2442	6.848
scNanoCT&ATAC-seq	H3K27ac	ATAC	GM12878-H3K27ac-2#18_5	74340843	14882	4995.4	14824	14453	13849	97.4973	2.2742	11656	5206	2.237	14639	2287	6.847
scNanoCT&ATAC-seq	H3K27ac	ATAC	GM12878-H3K27ac-2#18_6	58009263	13661	4246.3	11536	11192	10776	97.018	1.68343	6145	3567	2.579	14168	2290	7.407
scNanoCT&ATAC-seq	H3K27ac	ATAC	GM12878-H3K27ac-2#18_7	106072694	24953	4250.9	23576	22948	21883	97.3363	3.14131	15182	8041	2.82	26238	4106	5.694
scNanoCT&ATAC-seq	H3K27ac	ATAC	GM12878-H3K27ac-2#18_8	351044231	74487	4712.8	73104	71123	67746	97.2902	10.6236	52726	24010	2.574	75825	11965	7.097
scNanoCT&ATAC-seq	H3K27ac	ATAC	GM12878-H3K27ac-2#18_9	176590737	37676	4687.1	36610	35753	34121	97.6591	5.34376	26254	12717	2.101	38398	6208	6.803
scNanoCT&ATAC-seq	H3K27ac	ATAC	GM12878-H3K27ac-2#19_1	61121855	13455	4542.7	13347	13048	12466	97.7598	1.84712	7082	4761	2.08	16249	3012	5.847
scNanoCT&ATAC-seq	H3K27ac	ATAC	GM12878-H3K27ac-2#19_10	469168279	98446	4765.7	98119	96232	91325	98.0768	14.3861	119593	44748	3.156	53931	3062	4.038
scNanoCT&ATAC-seq	H3K27ac	ATAC	GM12878-H3K27ac-2#19_11	355258807	76564	4640	76187	74263	69989	97.4746	10.7576	50747	23178	2.916	82245	11946	5.925
scNanoCT&ATAC-seq	H3K27ac	ATAC	GM12878-H3K27ac-2#19_12	76225753	20804	3664	20714	20119	19354	97.1275	2.2712	14588	6010	2.12	22516	3255	6.966
scNanoCT&ATAC-seq	H3K27ac	ATAC	GM12878-H3K27ac-2#19_2	120376492	24898	4834.8	24701	24130	22859	97.6884	3.65567	22463	8227	2.893	20941	3274	5.639
scNanoCT&ATAC-seq	H3K27ac	ATAC	GM12878-H3K27ac-2#19_3	149109046	37079	4021.4	36899	36185	34424	98.065	4.49064	33249	12745	2.691	31992	3278	4.969
scNanoCT&ATAC-seq	H3K27ac	ATAC	GM12878-H3K27ac-2#19_4	87858597	17617	4987.1	17546	16953	16277	96.6203	2.65025	12879	5808	2.854	17824	2788	6.873
scNanoCT&ATAC-seq	H3K27ac	ATAC	GM12878-H3K27ac-2#19_5	368087367	75014	4906.9	74779	73366	69703	98.1104	11.3118	63349	25132	2.726	69457	9913	6.833
scNanoCT&ATAC-seq	H3K27ac	ATAC	GM12878-H3K27ac-2#19_6	370616549	86169	4301	83539	81970	77227	98.1218	11.1994	57415	25191	2.032	89637	13180	6.694
scNanoCT&ATAC-seq	H3K27ac	ATAC	GM12878-H3K27ac-2#19_7	339444517	83731	4054	82495	80812	76350	97.9599	10.1869	54813	27006	1.955	90596	12241	5.196
scNanoCT&ATAC-seq	H3K27ac	ATAC	GM12878-H3K27ac-2#19_8	182945439	40619	4503.9	38552	37828	35805	98.122	5.52486	24814	12603	1.888	43202	5751	6.036
scNanoCT&ATAC-seq	H3K27ac	ATAC	GM12878-H3K27ac-2#19_9	129332660	29917	4323	28450	27835	26354	97.8383	3.8273	20611	11252	3.209	29384	5033	6.616
scNanoCT&ATAC-seq	H3K27ac	ATAC	GM12878-H3K27ac-2#20_1	65839039	13620	4834	13543	13325	12715	98.3903	2.01533	11469	5580	2.783	12589	2311	7.843
scNanoCT&ATAC-seq	H3K27ac	ATAC	GM12878-H3K27ac-2#20_10	349169319	68798	5075.3	68603	67133	63476	97.8572	10.7112	51276	18524	2.477	69798	9786	7.937
scNanoCT&ATAC-seq	H3K27ac	ATAC	GM12878-H3K27ac-2#20_11	125672817	26091	4816.7	25981	25535	24032	98.2834	3.85457	18591	10035	2.725	27122	4744	7.186
scNanoCT&ATAC-seq	H3K27ac	ATAC	GM12878-H3K27ac-2#20_12	115433541	23306	4953	23175	22433	21437	96.7983	3.49152	13481	5152	2.236	27148	3627	6.298
scNanoCT&ATAC-seq	H3K27ac	ATAC	GM12878-H3K27ac-2#20_2	116015053	23716	4891.8	23592	22977	21877	97.3932	3.53055	17597	8334	2.853	23857	3766	6.038
scNanoCT&ATAC-seq	H3K27ac	ATAC	GM12878-H3K27ac-2#20_3	16304679	3599	4530.3	3564	3484	3373	97.7553	0.494194	1446	1021	1.775	4715	1127	7.008
scNanoCT&ATAC-seq	H3K27ac	ATAC	GM12878-H3K27ac-2#20_4	151128575	29334	5152	29229	28697	27544	98.1799	4.65043	22466	9048	2.459	29630	4462	6.887
scNanoCT&ATAC-seq	H3K27ac	ATAC	GM12878-H3K27ac-2#20_5	78191439	15581	5018.4	15484	15206	14492	98.2046	2.4116	12191	6380	3.765	15294	2706	9.108
scNanoCT&ATAC-seq	H3K27ac	ATAC	GM12878-H3K27ac-2#20_6	376846952	83830	4495.4	82375	80732	75967	98.0055	11.4487	55655	26747	2.283	89180	12066	6.838
scNanoCT&ATAC-seq	H3K27ac	ATAC	GM12878-H3K27ac-2#20_7	109812396	23941	4586.8	23383	22856	21703	97.7462	3.3128	13016	8296	3.059	27845	4636	6.272
scNanoCT&ATAC-seq	H3K27ac	ATAC	GM12878-H3K27ac-2#20_8	67729559	14727	4599	13487	13221	12517	98.0277	2.03436	8511	5841	2.938	15029	3265	8.891
scNanoCT&ATAC-seq	H3K27ac	ATAC	GM12878-H3K27ac-2#20_9	356776170	76689	4652.2	74641	73328	69027	98.2409	10.8918	53036	20792	2.324	78727	9898	5.878
scNanoCT&ATAC-seq	H3K27ac	ATAC	GM12878-H3K27ac-2#21_1	66226029	13819	4792.4	13662	13438	12862	98.3604	2.02858	10276	4628	2.555	14063	2452	6.588
scNanoCT&ATAC-seq	H3K27ac	ATAC	GM12878-H3K27ac-2#21_10	101383648	21182	4786.3	21099	20808	19892	98.6208	3.11167	11401	6493	3.082	26491	4324	6.55
scNanoCT&ATAC-seq	H3K27ac	ATAC	GM12878-H3K27ac-2#21_11	245587443	54538	4503.1	54227	53185	50381	98.0784	7.48621	42903	20891	2.38	52831	9198	6.751
scNanoCT&ATAC-seq	H3K27ac	ATAC	GM12878-H3K27ac-2#21_12	96598281	20767	4651.5	20593	20167	19336	97.9313	2.94612	14095	6831	2.983	22670	3699	6.648
scNanoCT&ATAC-seq	H3K27ac	ATAC	GM12878-H3K27ac-2#21_2	161779243	33898	4772.5	33687	32782	31314	97.3135	4.91277	28344	11517	2.732	30959	5472	7.892
scNanoCT&ATAC-seq	H3K27ac	ATAC	GM12878-H3K27ac-2#21_3	365576814	90540	4037.7	90222	88921	85148	98.558	11.1677	72200	31519	2.038	90491	11976	5.685
scNanoCT&ATAC-seq	H3K27ac	ATAC	GM12878-H3K27ac-2#21_4	83890124	16945	4950.7	16885	16499	15971	97.7139	2.56106	10523	4686	3.062	19831	2623	5.375
scNanoCT&ATAC-seq	H3K27ac	ATAC	GM12878-H3K27ac-2#21_5	144343764	29336	4920.4	29228	28666	27512	98.0772	4.44233	27890	10301	2.707	24412	4214	8.617
scNanoCT&ATAC-seq	H3K27ac	ATAC	GM12878-H3K27ac-2#21_6	123921836	28443	4356.8	26863	26364	25145	98.1424	3.7192	19395	8209	2.244	28311	4881	7.121
scNanoCT&ATAC-seq	H3K27ac	ATAC	GM12878-H3K27ac-2#21_7	81909956	20259	4043.1	19513	19082	18259	97.7912	2.43189	13876	7289	2.253	20463	3518	6.287
scNanoCT&ATAC-seq	H3K27ac	ATAC	GM12878-H3K27ac-2#21_8	116172557	24854	4674.2	24178	23682	22586	97.9485	3.52067	21078	7833	2.938	21669	3343	7.199
scNanoCT&ATAC-seq	H3K27ac	ATAC	GM12878-H3K27ac-2#21_9	250287618	57303	4367.8	56387	55101	52424	97.7193	7.56979	36644	18087	2.805	63573	8799	5.219
scNanoCT&ATAC-seq	H3K27ac	ATAC	GM12878-H3K27ac-2#22_1	241670334	51361	4705.3	51130	50024	47927	97.8369	7.3706	42195	16829	2.468	48536	6449	6.282
scNanoCT&ATAC-seq	H3K27ac	ATAC	GM12878-H3K27ac-2#22_10	98631473	19719	5001.8	19622	19113	18294	97.406	2.99356	13581	5182	3.336	21209	3017	6.015
scNanoCT&ATAC-seq	H3K27ac	ATAC	GM12878-H3K27ac-2#22_11	305601032	64229	4758	63959	62514	59513	97.7407	9.29775	49603	19656	2.247	63289	8271	6.383
scNanoCT&ATAC-seq	H3K27ac	ATAC	GM12878-H3K27ac-2#22_12	8327780	2821	2952.1	2797	2724	2711	97.3901	0.237228	2404	1242	1.622	2786	561	6.378
scNanoCT&ATAC-seq	H3K27ac	ATAC	GM12878-H3K27ac-2#22_2	95675229	19328	4950.1	19074	18572	17867	97.3681	2.90076	13142	4431	2.827	20553	2497	6.186
scNanoCT&ATAC-seq	H3K27ac	ATAC	GM12878-H3K27ac-2#22_3	100397488	23912	4198.6	23776	23281	22403	97.9181	3.03098	19846	8443	2.344	22687	3238	5.8
scNanoCT&ATAC-seq	H3K27ac	ATAC	GM12878-H3K27ac-2#22_4	192881198	38092	5063.6	37947	36980	35811	97.4517	5.88234	26583	11305	2.754	41422	5665	6.224
scNanoCT&ATAC-seq	H3K27ac	ATAC	GM12878-H3K27ac-2#22_5	38499524	7593	5070.4	7550	7421	7125	98.2914	1.18348	5245	2961	3.3	8170	1642	11.698
scNanoCT&ATAC-seq	H3K27ac	ATAC	GM12878-H3K27ac-2#22_6	156871978	34811	4506.4	33705	32818	31318	97.3683	4.71039	22021	8577	2.652	37560	4762	5.31
scNanoCT&ATAC-seq	H3K27ac	ATAC	GM12878-H3K27ac-2#22_7	167076681	41713	4005.4	40696	39847	38075	97.9138	4.97796	30060	11830	2.315	42508	5661	6.39
scNanoCT&ATAC-seq	H3K27ac	ATAC	GM12878-H3K27ac-2#22_8	220330147	44924	4904.5	44236	43467	41492	98.2616	6.76284	35081	15258	2.444	43517	7310	7.044
scNanoCT&ATAC-seq	H3K27ac	ATAC	GM12878-H3K27ac-2#22_9	164437169	35773	4596.7	34781	34161	32555	98.2174	4.9653	26631	13049	2.003	35006	6888	6.844
scNanoCT&ATAC-seq	H3K27ac	ATAC	GM12878-H3K27ac-2#23_1	194619894	40082	4855.5	39896	38906	37481	97.5185	5.92709	27352	12836	2.724	43611	6562	7.065
scNanoCT&ATAC-seq	H3K27ac	ATAC	GM12878-H3K27ac-2#23_10	61124111	12046	5074.2	11771	11545	11071	98.08	1.86427	9332	4578	2.65	11559	2024	9.513
scNanoCT&ATAC-seq	H3K27ac	ATAC	GM12878-H3K27ac-2#23_11	160919095	33599	4789.4	33397	32667	31201	97.8142	4.90065	18750	10151	2.66	40293	5182	5.15
scNanoCT&ATAC-seq	H3K27ac	ATAC	GM12878-H3K27ac-2#23_12	161133338	32787	4914.5	32636	32145	31118	98.4955	4.9714	28899	12496	2.635	30252	5723	7.972
scNanoCT&ATAC-seq	H3K27ac	ATAC	GM12878-H3K27ac-2#23_2	139801172	28114	4972.7	27875	27332	26276	98.052	4.26375	15694	6707	2.085	34154	4037	5.024
scNanoCT&ATAC-seq	H3K27ac	ATAC	GM12878-H3K27ac-2#23_3	35243436	8148	4325.4	8080	7948	7691	98.3663	1.07263	6154	2810	2.999	8249	1433	6.669
scNanoCT&ATAC-seq	H3K27ac	ATAC	GM12878-H3K27ac-2#23_4	120481638	24019	5016.1	23927	23414	22671	97.856	3.6903	15559	7870	2.449	27340	3585	4.85
scNanoCT&ATAC-seq	H3K27ac	ATAC	GM12878-H3K27ac-2#23_5	188690342	37739	4999.9	37585	36735	35348	97.7385	5.75534	35432	13071	2.423	31830	4889	7.355
scNanoCT&ATAC-seq	H3K27ac	ATAC	GM12878-H3K27ac-2#23_6	268848214	61221	4391.4	58347	57464	54779	98.4866	8.12666	52170	19854	2.603	52298	8128	7.211
scNanoCT&ATAC-seq	H3K27ac	ATAC	GM12878-H3K27ac-2#23_7	271286459	62065	4371	60511	59464	56607	98.2697	8.22766	43364	20148	2.344	64398	8768	5.554
scNanoCT&ATAC-seq	H3K27ac	ATAC	GM12878-H3K27ac-2#23_8	70730056	14441	4897.9	13774	13457	12938	97.6986	2.14324	5808	3803	2.895	18188	3803	6.69
scNanoCT&ATAC-seq	H3K27ac	ATAC	GM12878-H3K27ac-2#23_9	26258578	7174	3660.2	5172	4984	4848	96.365	0.703073	1472	854	1.249	7498	1328	5.549
scNanoCT&ATAC-seq	H3K27ac	ATAC	GM12878-H3K27ac-2#24_1	236146819	47585	4962.6	47369	46470	44227	98.1021	7.25157	18046	11537	3.174	65563	7710	5.094
scNanoCT&ATAC-seq	H3K27ac	ATAC	GM12878-H3K27ac-2#24_10	281914372	58136	4849.2	57941	56676	53749	97.8167	8.61056	27979	16246	2.637	74628	10409	5.807
scNanoCT&ATAC-seq	H3K27ac	ATAC	GM12878-H3K27ac-2#24_11	357919015	75342	4750.6	74720	73337	68973	98.1491	10.9701	48937	20023	2.505	82726	11214	6.508
scNanoCT&ATAC-seq	H3K27ac	ATAC	GM12878-H3K27ac-2#24_12	388526301	83227	4668.3	82850	81503	77507	98.3742	11.9116	68333	29283	2.339	79589	12646	7.495
scNanoCT&ATAC-seq	H3K27ac	ATAC	GM12878-H3K27ac-2#24_2	112128474	23479	4775.7	23298	22764	21450	97.708	3.40073	19484	9621	2.397	21002	3532	7.398
scNanoCT&ATAC-seq	H3K27ac	ATAC	GM12878-H3K27ac-2#24_3	233178946	57360	4065.2	57110	55799	52692	97.7044	7.04072	50358	19899	2.615	50104	8113	7.53
scNanoCT&ATAC-seq	H3K27ac	ATAC	GM12878-H3K27ac-2#24_4	391564902	78563	4984.1	78221	76569	72614	97.888	12.0048	54006	19225	2.489	83998	9867	5.84
scNanoCT&ATAC-seq	H3K27ac	ATAC	GM12878-H3K27ac-2#24_5	187222955	38418	4873.3	38277	37598	35532	98.2261	5.74385	31931	14850	2.933	35962	5710	6.991
scNanoCT&ATAC-seq	H3K27ac	ATAC	GM12878-H3K27ac-2#24_6	458001219	102272	4478.3	100515	98186	91700	97.6829	13.8729	64731	27845	2.419	110282	15067	5.529
scNanoCT&ATAC-seq	H3K27ac	ATAC	GM12878-H3K27ac-2#24_7	170523072	40739	4185.7	39870	39081	36520	98.0211	5.097	29536	14069	2.219	39723	6160	6.566
scNanoCT&ATAC-seq	H3K27ac	ATAC	GM12878-H3K27ac-2#24_8	56239481	11418	4925.5	10169	9948	9529	97.8267	1.66652	1972	1337	6.759	15709	2652	6.318
scNanoCT&ATAC-seq	H3K27ac	ATAC	GM12878-H3K27ac-2#24_9	372473688	80910	4603.6	79855	78392	73182	98.1679	11.3818	59820	22452	2.511	79556	11880	7.167
scNanoCT&ATAC-seq	H3K27ac	ATAC	GM12878-H3K27ac-3#25_1	225548299	47933	4705.5	47717	46834	44825	98.1495	6.90812	33575	16121	2.738	51545	6994	5.501
scNanoCT&ATAC-seq	H3K27ac	ATAC	GM12878-H3K27ac-3#25_10	249076359	51376	4848.1	51220	49912	47555	97.4463	7.575	31211	14133	2.69	59737	6748	5.22
scNanoCT&ATAC-seq	H3K27ac	ATAC	GM12878-H3K27ac-3#25_11	111861645	22454	4981.8	22311	21790	20813	97.6648	3.41428	11932	7468	3.029	27577	4485	6.599
scNanoCT&ATAC-seq	H3K27ac	ATAC	GM12878-H3K27ac-3#25_12	50963789	10052	5070	9944	9645	9208	96.9932	1.5332	5686	3166	2.566	11644	2276	8.684
scNanoCT&ATAC-seq	H3K27ac	ATAC	GM12878-H3K27ac-3#25_2	195732940	39107	5005.1	38918	38133	36386	97.9829	5.99715	33006	15057	2.766	36123	6475	7.147
scNanoCT&ATAC-seq	H3K27ac	ATAC	GM12878-H3K27ac-3#25_3	173855679	43739	3974.8	43562	42765	40828	98.1704	5.26343	31478	13026	2.192	46495	6148	6.26
scNanoCT&ATAC-seq	H3K27ac	ATAC	GM12878-H3K27ac-3#25_4	143431527	28551	5023.7	28460	27951	26856	98.2115	4.41834	16960	8528	2.106	33977	4463	5.452
scNanoCT&ATAC-seq	H3K27ac	ATAC	GM12878-H3K27ac-3#25_5	72738125	14214	5117.4	14142	13853	13274	97.9564	2.23569	8560	5247	2.894	16391	2912	8.106
scNanoCT&ATAC-seq	H3K27ac	ATAC	GM12878-H3K27ac-3#25_6	118846359	26408	4500.4	25756	25252	23979	98.0432	3.60751	18719	9415	2.319	26951	4671	6.498
scNanoCT&ATAC-seq	H3K27ac	ATAC	GM12878-H3K27ac-3#25_7	169637403	36930	4593.5	36471	35763	33989	98.0587	5.161	26439	11362	2.574	38071	5474	6.125
scNanoCT&ATAC-seq	H3K27ac	ATAC	GM12878-H3K27ac-3#25_8	86876988	18472	4703.2	17588	17192	16423	97.7485	2.63601	12211	6719	2.482	18849	2941	6.445
scNanoCT&ATAC-seq	H3K27ac	ATAC	GM12878-H3K27ac-3#25_9	111818389	21003	5323.9	20316	19598	18973	96.4658	3.37496	2311	1087	1.458	33214	5773	6.815
scNanoCT&ATAC-seq	H3K27ac	ATAC	GM12878-H3K27ac-3#26_1	132849987	28082	4730.8	27958	27320	26239	97.718	4.05209	15302	9041	2.652	34394	4582	6.012
scNanoCT&ATAC-seq	H3K27ac	ATAC	GM12878-H3K27ac-3#26_10	117710122	22840	5153.7	22734	22412	21480	98.5836	3.63589	16014	6784	2.931	24908	3164	7.921
scNanoCT&ATAC-seq	H3K27ac	ATAC	GM12878-H3K27ac-3#26_11	138899454	29432	4719.3	29247	28791	27428	98.4409	4.268	24331	11583	2.699	27803	5424	7.073
scNanoCT&ATAC-seq	H3K27ac	ATAC	GM12878-H3K27ac-3#26_12	182092447	38015	4790	37841	36983	35361	97.7326	5.55071	18257	10023	2.227	49049	5715	5.123
scNanoCT&ATAC-seq	H3K27ac	ATAC	GM12878-H3K27ac-3#26_2	152472294	31521	4837.2	31384	30418	29102	96.922	4.61631	20463	7987	2.954	34589	4391	5.103
scNanoCT&ATAC-seq	H3K27ac	ATAC	GM12878-H3K27ac-3#26_3	52441802	21286	2463.7	21189	20802	20197	98.1736	1.52252	17088	7882	1.734	21575	3419	4.634
scNanoCT&ATAC-seq	H3K27ac	ATAC	GM12878-H3K27ac-3#26_4	119791550	23650	5065.2	23563	22857	22034	97.0038	3.64096	12607	5522	2.992	29039	3014	4.572
scNanoCT&ATAC-seq	H3K27ac	ATAC	GM12878-H3K27ac-3#26_5	16409629	5027	3264.3	4978	4806	4676	96.5448	0.475103	2544	444	1.212	6729	158	2.176
scNanoCT&ATAC-seq	H3K27ac	ATAC	GM12878-H3K27ac-3#26_6	188029013	40656	4624.9	38341	37678	35883	98.2708	5.70382	31940	13219	2.834	36208	5504	6.688
scNanoCT&ATAC-seq	H3K27ac	ATAC	GM12878-H3K27ac-3#26_7	240479674	49696	4839	49078	48340	46026	98.4963	7.40741	41838	16250	2.329	45349	7125	7.417
scNanoCT&ATAC-seq	H3K27ac	ATAC	GM12878-H3K27ac-3#26_8	233058301	49642	4694.8	48856	47522	45196	97.2695	7.06261	39976	15183	2.529	45968	4774	4.431
scNanoCT&ATAC-seq	H3K27ac	ATAC	GM12878-H3K27ac-3#26_9	135828257	28030	4845.8	27584	26831	25588	97.2702	4.12084	19595	7052	3.269	29088	3485	7.025
scNanoCT&ATAC-seq	H3K27ac	ATAC	GM12878-H3K27ac-3#27_1	79718419	16329	4882	16245	15895	15250	97.8455	2.43576	11806	5786	2.559	16988	2945	7.225
scNanoCT&ATAC-seq	H3K27ac	ATAC	GM12878-H3K27ac-3#27_10	478973088	97005	4937.6	96736	94827	90495	98.0266	14.7319	65864	28689	2.855	107235	17917	7.256
scNanoCT&ATAC-seq	H3K27ac	ATAC	GM12878-H3K27ac-3#27_11	169062280	35679	4738.4	35464	34741	33172	97.9613	5.15246	21427	10986	2.552	41535	5423	5.767
scNanoCT&ATAC-seq	H3K27ac	ATAC	GM12878-H3K27ac-3#27_12	122052671	25326	4819.3	25179	24695	23609	98.0778	3.74116	18237	7894	2.712	26400	4358	7.176
scNanoCT&ATAC-seq	H3K27ac	ATAC	GM12878-H3K27ac-3#27_2	219341694	45848	4784.1	45642	44980	42819	98.5496	6.74437	31755	14723	2.397	49601	7754	6.631
scNanoCT&ATAC-seq	H3K27ac	ATAC	GM12878-H3K27ac-3#27_3	181064138	43588	4154	43383	42419	40575	97.7779	5.48599	36923	12923	2.3	40068	5393	7.232
scNanoCT&ATAC-seq	H3K27ac	ATAC	GM12878-H3K27ac-3#27_4	28570115	7931	3602.3	7906	7725	7572	97.7106	0.855672	4915	2329	2.358	9502	1385	5.201
scNanoCT&ATAC-seq	H3K27ac	ATAC	GM12878-H3K27ac-3#27_5	153800801	31299	4913.9	31192	30446	29208	97.6084	4.69829	26847	13874	2.525	28716	4907	6.639
scNanoCT&ATAC-seq	H3K27ac	ATAC	GM12878-H3K27ac-3#27_6	369601272	80348	4600	79477	77814	73858	97.9076	11.2572	56658	21165	2.412	84254	10936	6.703
scNanoCT&ATAC-seq	H3K27ac	ATAC	GM12878-H3K27ac-3#27_7	83455187	18013	4633.1	17598	17084	16374	97.0792	2.50383	8605	5341	2.266	22233	3186	6.203
scNanoCT&ATAC-seq	H3K27ac	ATAC	GM12878-H3K27ac-3#27_8	491876427	101776	4832.9	100540	98528	93905	97.9988	15.0583	73748	32420	2.866	104665	15435	6.485
scNanoCT&ATAC-seq	H3K27ac	ATAC	GM12878-H3K27ac-3#27_9	145756820	31617	4610.1	30779	29951	28604	97.3099	4.38967	19739	10379	2.271	34439	5512	5.611
scNanoCT&ATAC-seq	H3K27ac	ATAC	GM12878-H3K27ac-3#28_1	256173559	56090	4567.2	55832	54408	51828	97.4495	7.75787	48001	15781	2.355	50758	5538	5.389
scNanoCT&ATAC-seq	H3K27ac	ATAC	GM12878-H3K27ac-3#28_10	188806281	38691	4879.9	38569	37931	36146	98.3458	5.78895	34665	17121	2.5	34118	6479	7.984
scNanoCT&ATAC-seq	H3K27ac	ATAC	GM12878-H3K27ac-3#28_11	177687809	37316	4761.7	36971	36207	34392	97.9335	5.40837	29264	14473	2.443	35783	6561	7.428
scNanoCT&ATAC-seq	H3K27ac	ATAC	GM12878-H3K27ac-3#28_12	123617590	25715	4807.2	25587	25214	23990	98.5422	3.79707	21039	8390	2.545	24740	3653	6.5
scNanoCT&ATAC-seq	H3K27ac	ATAC	GM12878-H3K27ac-3#28_2	185616205	39416	4709.2	39192	38336	36537	97.8159	5.65162	27707	12125	2.328	41517	5658	6.099
scNanoCT&ATAC-seq	H3K27ac	ATAC	GM12878-H3K27ac-3#28_3	223096325	53423	4176	53215	52110	49865	97.9235	6.74591	41124	19459	2.548	53379	8501	6.343
scNanoCT&ATAC-seq	H3K27ac	ATAC	GM12878-H3K27ac-3#28_4	202256220	40509	4992.9	40362	39545	37906	97.9758	6.18509	32706	15092	2.907	39057	6441	6.993
scNanoCT&ATAC-seq	H3K27ac	ATAC	GM12878-H3K27ac-3#28_5	139645417	27851	5014	27736	26880	25795	96.9138	4.22562	12058	6355	2.406	36752	4278	4.974
scNanoCT&ATAC-seq	H3K27ac	ATAC	GM12878-H3K27ac-3#28_6	118795939	25858	4594.2	24614	23817	22590	96.762	3.52693	19965	7241	2.347	22927	3420	6.196
scNanoCT&ATAC-seq	H3K27ac	ATAC	GM12878-H3K27ac-3#28_7	73087094	14327	5101.4	13869	13524	13037	97.5124	2.20324	3578	2280	2.421	20874	4723	7.61
scNanoCT&ATAC-seq	H3K27ac	ATAC	GM12878-H3K27ac-3#28_8	91754645	18867	4863.2	18071	17550	16830	97.1169	2.75672	7638	3940	3.771	24218	3492	6.777
scNanoCT&ATAC-seq	H3K27ac	ATAC	GM12878-H3K27ac-3#28_9	104087891	22073	4715.6	21407	20830	19999	97.3046	3.11202	9852	5800	3.146	27883	3284	4.499
scNanoCT&ATAC-seq	H3K27ac	ATAC	GM12878-H3K27ac-3#29_1	91623239	18584	4930.2	18483	18087	17411	97.8575	2.80585	11498	6551	2.629	21403	3239	7.023
scNanoCT&ATAC-seq	H3K27ac	ATAC	GM12878-H3K27ac-3#29_10	301730086	60306	5003.3	60140	58858	56405	97.8683	9.22989	42837	16731	2.732	64557	9027	5.945
scNanoCT&ATAC-seq	H3K27ac	ATAC	GM12878-H3K27ac-3#29_11	173013613	37286	4640.2	37082	36199	34511	97.6188	5.24045	23972	13106	2.108	41536	5760	4.729
scNanoCT&ATAC-seq	H3K27ac	ATAC	GM12878-H3K27ac-3#29_12	53079600	10914	4863.4	10822	10648	10181	98.3922	1.62918	7926	4113	3.783	11223	2454	9.915
scNanoCT&ATAC-seq	H3K27ac	ATAC	GM12878-H3K27ac-3#29_2	171619034	34819	4928.9	34632	34154	32677	98.6198	5.29982	26430	10982	2.457	35867	5426	6.723
scNanoCT&ATAC-seq	H3K27ac	ATAC	GM12878-H3K27ac-3#29_3	78550775	19083	4116.3	18992	18659	17929	98.2466	2.37979	13942	7505	2.008	20139	3249	5.74
scNanoCT&ATAC-seq	H3K27ac	ATAC	GM12878-H3K27ac-3#29_4	52047310	10211	5097.2	10166	9944	9615	97.8163	1.59045	7742	3503	3.246	10429	1829	5.962
scNanoCT&ATAC-seq	H3K27ac	ATAC	GM12878-H3K27ac-3#29_5	188833225	38741	4874.2	38617	37982	36517	98.3556	5.8083	29104	13944	2.46	40575	6295	5.568
scNanoCT&ATAC-seq	H3K27ac	ATAC	GM12878-H3K27ac-3#29_6	317515765	68323	4647.3	66645	65042	62078	97.5947	9.63177	47621	19778	2.666	70316	10079	7.5
scNanoCT&ATAC-seq	H3K27ac	ATAC	GM12878-H3K27ac-3#29_7	102797107	22400	4589.2	21744	21174	20260	97.3786	3.08918	13982	6729	2.949	24267	3566	6.697
scNanoCT&ATAC-seq	H3K27ac	ATAC	GM12878-H3K27ac-3#29_8	70004855	15114	4631.8	13867	13386	12841	96.5313	2.07057	7400	4968	2.416	16669	2851	5.779
scNanoCT&ATAC-seq	H3K27ac	ATAC	GM12878-H3K27ac-3#29_9	177256884	37187	4766.6	36172	35331	33944	97.675	5.35636	17240	9947	2.004	46969	5294	5.217
scNanoCT&ATAC-seq	H3K27ac	ATAC	GM12878-H3K27ac-3#30_1	183104941	38592	4744.6	38417	37575	35876	97.8083	5.56579	30991	15181	2.862	36777	6352	6.733
scNanoCT&ATAC-seq	H3K27ac	ATAC	GM12878-H3K27ac-3#30_10	381209308	76896	4957.5	76652	75076	71532	97.944	11.6964	62563	26917	2.656	74135	11997	6.826
scNanoCT&ATAC-seq	H3K27ac	ATAC	GM12878-H3K27ac-3#30_11	129077458	25896	4984.5	25664	25079	23802	97.7205	3.93336	20951	7602	2.276	24351	3545	6.486
scNanoCT&ATAC-seq	H3K27ac	ATAC	GM12878-H3K27ac-3#30_12	323341388	64939	4979.2	64698	63197	60109	97.68	9.90763	49336	20093	3.302	65338	11115	7.981
scNanoCT&ATAC-seq	H3K27ac	ATAC	GM12878-H3K27ac-3#30_2	152744769	30685	4977.8	30511	29994	28593	98.3055	4.69054	23049	11843	2.536	31169	5988	7.807
scNanoCT&ATAC-seq	H3K27ac	ATAC	GM12878-H3K27ac-3#30_3	259540043	64728	4009.7	64491	63328	60412	98.1966	7.88178	56516	24000	2.642	58828	8674	5.981
scNanoCT&ATAC-seq	H3K27ac	ATAC	GM12878-H3K27ac-3#30_4	268447527	53289	5037.6	53144	52310	50100	98.4307	8.27235	43248	17639	2.298	51702	7042	7.375
scNanoCT&ATAC-seq	H3K27ac	ATAC	GM12878-H3K27ac-3#30_5	31182566	6001	5196.2	5963	5881	5651	98.6249	0.962678	3225	2222	3.977	7397	1826	8.512
scNanoCT&ATAC-seq	H3K27ac	ATAC	GM12878-H3K27ac-3#30_6	157510068	33877	4649.5	32943	32283	30616	97.9965	4.77356	23058	11228	2.1	35053	6087	6.194
scNanoCT&ATAC-seq	H3K27ac	ATAC	GM12878-H3K27ac-3#30_7	355117408	78622	4516.8	77889	76386	72323	98.0703	10.8038	68605	27157	2.52	68714	10694	6.923
scNanoCT&ATAC-seq	H3K27ac	ATAC	GM12878-H3K27ac-3#30_8	44372927	9182	4832.6	8280	7878	7561	95.1449	1.31153	2224	1636	5.457	12132	2409	6.99
scNanoCT&ATAC-seq	H3K27ac	ATAC	GM12878-H3K27ac-3#30_9	54556224	12902	4228.5	11016	10696	10256	97.0951	1.58302	4984	3236	2.527	14031	2763	6.785
scNanoCT&ATAC-seq	H3K27ac	ATAC	GM12878-H3K27ac-3#31_1	210760711	44883	4695.8	44675	43667	41755	97.7437	6.40687	27048	14670	2.521	52360	6756	5.711
scNanoCT&ATAC-seq	H3K27ac	ATAC	GM12878-H3K27ac-3#31_10	232008723	46690	4969.1	46501	45301	43390	97.4194	7.03689	27747	13158	2.347	54640	7425	5.714
scNanoCT&ATAC-seq	H3K27ac	ATAC	GM12878-H3K27ac-3#31_11	142632856	29970	4759.2	29732	29081	27601	97.8104	4.34392	24969	10794	2.813	27499	4575	7.557
scNanoCT&ATAC-seq	H3K27ac	ATAC	GM12878-H3K27ac-3#31_12	131563204	26902	4890.5	26768	26119	25007	97.5755	4.00854	12191	7383	2.679	35224	5151	5.739
scNanoCT&ATAC-seq	H3K27ac	ATAC	GM12878-H3K27ac-3#31_2	97926205	19952	4908.1	19827	19423	18556	97.9624	2.98285	13690	6068	2.707	21405	3433	6.358
scNanoCT&ATAC-seq	H3K27ac	ATAC	GM12878-H3K27ac-3#31_3	146810241	35951	4083.6	35793	35107	33622	98.0834	4.4463	28068	11132	2.088	35947	3915	6.308
scNanoCT&ATAC-seq	H3K27ac	ATAC	GM12878-H3K27ac-3#31_4	161868966	30893	5239.7	30759	30180	29032	98.1176	4.989	26648	9736	2.801	28270	4478	7.2
scNanoCT&ATAC-seq	H3K27ac	ATAC	GM12878-H3K27ac-3#31_5	79131772	15610	5069.3	15502	15169	14598	97.8519	2.42127	12005	4461	3.095	15810	2334	6.871
scNanoCT&ATAC-seq	H3K27ac	ATAC	GM12878-H3K27ac-3#31_6	146950767	33623	4370.5	32161	31517	29957	97.9976	4.42594	23157	12415	2.312	33983	5526	6.002
scNanoCT&ATAC-seq	H3K27ac	ATAC	GM12878-H3K27ac-3#31_7	177886653	38062	4673.6	37313	36308	34672	97.3066	5.35056	19461	10686	2.923	46319	5016	4.962
scNanoCT&ATAC-seq	H3K27ac	ATAC	GM12878-H3K27ac-3#31_8	185584991	37526	4945.5	36532	36001	34385	98.5465	5.71258	31817	12386	2.527	33340	5758	8.686
scNanoCT&ATAC-seq	H3K27ac	ATAC	GM12878-H3K27ac-3#31_9	136391754	28568	4774.3	27589	27027	25732	97.963	4.12973	22010	10156	2.65	26914	4489	7.478
scNanoCT&ATAC-seq	H3K27ac	ATAC	GM12878-H3K27ac-3#32_1	78115819	15644	4993.3	15520	15220	14676	98.067	2.39935	10958	3768	3.007	16789	2177	6.286
scNanoCT&ATAC-seq	H3K27ac	ATAC	GM12878-H3K27ac-3#32_10	107379669	21217	5061	21138	20670	19846	97.786	3.26531	16040	7212	2.277	21752	3368	7.289
scNanoCT&ATAC-seq	H3K27ac	ATAC	GM12878-H3K27ac-3#32_11	184969396	37200	4972.3	37001	36292	34714	98.0838	5.67261	31063	13381	2.927	35043	6154	7.984
scNanoCT&ATAC-seq	H3K27ac	ATAC	GM12878-H3K27ac-3#32_12	169770900	34186	4966.1	34050	33133	31855	97.3069	5.13622	15656	9381	1.917	45066	5159	5.847
scNanoCT&ATAC-seq	H3K27ac	ATAC	GM12878-H3K27ac-3#32_2	59529618	11824	5034.6	11730	11483	11037	97.8943	1.81886	8119	4441	3.38	12700	2256	7.769
scNanoCT&ATAC-seq	H3K27ac	ATAC	GM12878-H3K27ac-3#32_3	73466597	17193	4273.1	17083	16776	16151	98.2029	2.22885	11620	5646	2.367	18935	2962	7.733
scNanoCT&ATAC-seq	H3K27ac	ATAC	GM12878-H3K27ac-3#32_4	29723119	5755	5164.7	5725	5645	5508	98.6026	0.915014	4602	2046	2.624	5799	1017	9.883
scNanoCT&ATAC-seq	H3K27ac	ATAC	GM12878-H3K27ac-3#32_5	320663622	60859	5269	60661	59657	57464	98.3449	9.90856	62219	23855	2.678	47319	8380	7.543
scNanoCT&ATAC-seq	H3K27ac	ATAC	GM12878-H3K27ac-3#32_7	211002688	46486	4539.1	45896	44835	42873	97.6883	6.39027	29003	12855	1.975	52664	6311	4.772
scNanoCT&ATAC-seq	H3K27ac	ATAC	GM12878-H3K27ac-3#32_8	448056099	91296	4907.7	89890	88114	84424	98.0243	13.7192	64310	25894	2.435	96555	13518	7.014
scNanoCT&ATAC-seq	H3K27ac	ATAC	GM12878-H3K27ac-3#32_9	123202496	26316	4681.7	25242	24695	23697	97.833	3.70048	16771	7890	1.777	28346	4044	6.874
scNanoCT&ATAC-seq	H3K27ac	ATAC	GM12878-H3K27ac-4#33_1	94808126	20059	4726.5	19977	19553	19008	97.8776	2.89455	8927	5027	2.444	27150	3351	4.812
scNanoCT&ATAC-seq	H3K27ac	ATAC	GM12878-H3K27ac-4#33_11	191749764	39417	4864.6	39196	38178	36589	97.4028	5.8466	31646	11541	2.718	37975	5637	7.329
scNanoCT&ATAC-seq	H3K27ac	ATAC	GM12878-H3K27ac-4#33_12	40795951	7812	5222.2	7758	7601	7417	97.9763	1.25196	2137	1459	2.4	11910	2073	5.928
scNanoCT&ATAC-seq	H3K27ac	ATAC	GM12878-H3K27ac-4#33_2	309401842	66868	4627.1	66310	65066	62927	98.124	9.4587	80524	26009	2.459	39575	1363	2.861
scNanoCT&ATAC-seq	H3K27ac	ATAC	GM12878-H3K27ac-4#33_3	50810797	12471	4074.3	12406	12089	11742	97.4448	1.5073	9220	4789	2.531	12969	1981	6.382
scNanoCT&ATAC-seq	H3K27ac	ATAC	GM12878-H3K27ac-4#33_4	166569421	33075	5036.1	32976	32440	31505	98.3746	5.14195	24763	8892	3.101	35106	4812	7.363
scNanoCT&ATAC-seq	H3K27ac	ATAC	GM12878-H3K27ac-4#33_5	346686055	71054	4879.2	70875	69500	67141	98.06	10.6654	65718	26900	2.461	62638	11168	8.3
scNanoCT&ATAC-seq	H3K27ac	ATAC	GM12878-H3K27ac-4#33_6	63847074	13966	4571.6	13009	12715	12331	97.74	1.92053	8407	4477	2.451	14951	2461	6.575
scNanoCT&ATAC-seq	H3K27ac	ATAC	GM12878-H3K27ac-4#33_7	81155896	16774	4838.2	16423	16092	15567	97.9845	2.47021	9822	5214	2.858	19706	3034	5.469
scNanoCT&ATAC-seq	H3K27ac	ATAC	GM12878-H3K27ac-4#33_8	107256867	22537	4759.1	21748	21251	20586	97.7147	3.25271	13902	6209	2.505	25195	3456	6.754
scNanoCT&ATAC-seq	H3K27ac	ATAC	GM12878-H3K27ac-4#33_9	133269233	28758	4634.2	28271	27700	26743	97.9803	4.04871	20207	9336	2.728	30746	4382	5.017
scNanoCT&ATAC-seq	H3K27ac	ATAC	GM12878-H3K27ac-4#34_1	150814836	33054	4562.7	32901	32215	31193	97.915	4.58012	17931	9834	2.259	41610	5355	5.132
scNanoCT&ATAC-seq	H3K27ac	ATAC	GM12878-H3K27ac-4#34_10	131453690	28495	4613.2	28398	27904	27160	98.2604	4.01782	13669	6318	1.496	37830	2998	3.523
scNanoCT&ATAC-seq	H3K27ac	ATAC	GM12878-H3K27ac-4#34_11	95219446	19922	4779.6	19814	19289	18485	97.3504	2.88797	12754	5609	2.411	22467	3100	6.674
scNanoCT&ATAC-seq	H3K27ac	ATAC	GM12878-H3K27ac-4#34_12	26602137	5292	5026.9	5252	5160	5041	98.2483	0.814425	2083	1519	2.96	7350	1613	7.764
scNanoCT&ATAC-seq	H3K27ac	ATAC	GM12878-H3K27ac-4#34_2	96544634	20117	4799.2	19994	19647	18884	98.2645	2.95677	11749	6160	2.879	24012	3404	6.891
scNanoCT&ATAC-seq	H3K27ac	ATAC	GM12878-H3K27ac-4#34_3	54752036	13345	4102.8	13271	12960	12599	97.6565	1.64327	6556	4236	2.685	17197	2284	5.425
scNanoCT&ATAC-seq	H3K27ac	ATAC	GM12878-H3K27ac-4#34_4	124011294	25983	4772.8	25882	25417	24673	98.2034	3.81073	13557	7908	2.247	33282	4602	6.628
scNanoCT&ATAC-seq	H3K27ac	ATAC	GM12878-H3K27ac-4#34_5	64409792	12384	5201	12342	11914	11488	96.5322	1.94374	4776	2921	2.618	16650	2834	6.735
scNanoCT&ATAC-seq	H3K27ac	ATAC	GM12878-H3K27ac-4#34_6	130018404	28897	4499.4	28079	27381	26337	97.5142	3.93289	18223	7421	2.575	31721	3602	4.888
scNanoCT&ATAC-seq	H3K27ac	ATAC	GM12878-H3K27ac-4#34_7	181663067	40290	4508.9	39998	39021	37633	97.5574	5.47925	25701	11703	2.197	45743	5086	4.718
scNanoCT&ATAC-seq	H3K27ac	ATAC	GM12878-H3K27ac-4#34_8	113892012	23737	4798.1	23465	22934	22267	97.7371	3.42644	10146	6135	2.429	32124	4256	5.488
scNanoCT&ATAC-seq	H3K27ac	ATAC	GM12878-H3K27ac-4#34_9	241593874	50601	4774.5	50239	49436	47409	98.4016	7.4138	38108	14969	2.593	52017	7022	6.411
scNanoCT&ATAC-seq	H3K27ac	ATAC	GM12878-H3K27ac-4#35_1	307583740	70550	4359.8	70280	68513	65710	97.4858	9.3171	79884	30806	2.495	44823	1645	2.911
scNanoCT&ATAC-seq	H3K27ac	ATAC	GM12878-H3K27ac-4#35_10	212322638	44361	4786.2	44196	43342	41811	98.0677	6.50156	49877	15603	1.912	29877	1935	4.21
scNanoCT&ATAC-seq	H3K27ac	ATAC	GM12878-H3K27ac-4#35_11	107106992	21889	4893.2	21732	21270	20077	97.8741	3.26346	16319	6918	2.986	21580	3712	7.567
scNanoCT&ATAC-seq	H3K27ac	ATAC	GM12878-H3K27ac-4#35_12	329636991	68457	4815.2	68218	66750	63450	97.8481	10.0822	48878	16088	1.874	71975	8063	5.616
scNanoCT&ATAC-seq	H3K27ac	ATAC	GM12878-H3K27ac-4#35_2	82583292	16876	4893.5	16783	16395	15713	97.6881	2.51539	11230	6118	2.617	18487	3273	7.253
scNanoCT&ATAC-seq	H3K27ac	ATAC	GM12878-H3K27ac-4#35_3	201940161	50765	3977.9	50555	49501	47528	97.9151	6.09984	38877	16787	2.42	51990	7515	5.953
scNanoCT&ATAC-seq	H3K27ac	ATAC	GM12878-H3K27ac-4#35_4	114700102	22427	5114.4	22354	21943	21174	98.1614	3.52514	14101	6546	2.244	25970	3232	6.07
scNanoCT&ATAC-seq	H3K27ac	ATAC	GM12878-H3K27ac-4#35_5	95005117	18747	5067.8	18673	18196	17441	97.4455	2.88949	12744	6438	2.266	20375	3413	6.337
scNanoCT&ATAC-seq	H3K27ac	ATAC	GM12878-H3K27ac-4#35_6	104192388	22659	4598.3	21728	21145	20171	97.3168	3.12126	13098	6299	3.259	25106	3640	6.149
scNanoCT&ATAC-seq	H3K27ac	ATAC	GM12878-H3K27ac-4#35_7	85636752	17734	4829	17377	17008	16366	97.8765	2.60047	12200	6986	2.639	18663	3307	6.422
scNanoCT&ATAC-seq	H3K27ac	ATAC	GM12878-H3K27ac-4#35_8	294485167	62327	4724.8	61386	60070	57463	97.8562	8.94787	50792	19531	2.637	59144	8737	7.232
scNanoCT&ATAC-seq	H3K27ac	ATAC	GM12878-H3K27ac-4#35_9	255087238	52216	4885.2	51468	50614	48382	98.3407	7.83193	49847	17995	2.763	42045	6010	6.635
scNanoCT&ATAC-seq	H3K27ac	ATAC	GM12878-H3K27ac-4#36_1	166295474	35061	4743	34881	33867	32630	97.093	5.02579	13781	8217	2.472	47796	5520	4.983
scNanoCT&ATAC-seq	H3K27ac	ATAC	GM12878-H3K27ac-4#36_10	76335107	15208	5019.4	15136	14792	14322	97.7273	2.31421	14951	6003	3.429	12317	1607	5.827
scNanoCT&ATAC-seq	H3K27ac	ATAC	GM12878-H3K27ac-4#36_11	152432118	31419	4851.6	31222	30553	28808	97.8573	4.65386	19498	8612	2.7	35273	5082	7.481
scNanoCT&ATAC-seq	H3K27ac	ATAC	GM12878-H3K27ac-4#36_12	126006967	26291	4792.8	26176	25684	24530	98.1204	3.85563	26585	11148	2.6	19959	2415	6.631
scNanoCT&ATAC-seq	H3K27ac	ATAC	GM12878-H3K27ac-4#36_2	44354917	8678	5111.2	8591	8404	8153	97.8233	1.3503	5305	2320	2.592	10207	1663	8.008
scNanoCT&ATAC-seq	H3K27ac	ATAC	GM12878-H3K27ac-4#36_3	110174663	27190	4052	27041	26323	25302	97.3448	3.29398	20183	8619	2.311	28155	3814	5.197
scNanoCT&ATAC-seq	H3K27ac	ATAC	GM12878-H3K27ac-4#36_4	189594727	38759	4891.6	38645	37981	36608	98.2818	5.83702	28291	13795	2.4	41115	6708	6.243
scNanoCT&ATAC-seq	H3K27ac	ATAC	GM12878-H3K27ac-4#36_5	85514597	16850	5075.1	16796	16480	15810	98.1186	2.63255	12745	5732	3.396	17213	2300	8.862
scNanoCT&ATAC-seq	H3K27ac	ATAC	GM12878-H3K27ac-4#36_6	133362966	29398	4536.5	28155	27456	26357	97.5173	4.00965	16760	9219	2.396	33167	4755	6.097
scNanoCT&ATAC-seq	H3K27ac	ATAC	GM12878-H3K27ac-4#36_7	181276513	39128	4632.9	38840	38082	36935	98.0484	5.51686	28495	12978	2.315	41794	5949	6.854
scNanoCT&ATAC-seq	H3K27ac	ATAC	GM12878-H3K27ac-4#36_8	55023804	11571	4755.3	11203	11065	10755	98.7682	1.67647	8493	4711	2.078	11912	2238	9.217
scNanoCT&ATAC-seq	H3K27ac	ATAC	GM12878-H3K27ac-4#36_9	158416913	34411	4603.7	33939	33045	31802	97.3659	4.75614	21752	10989	2.478	38523	5238	5.603
scNanoCT&ATAC-seq	H3K27ac	ATAC	GM12878-H3K27ac-4#37_1	153591503	33197	4626.7	33072	32319	31210	97.7231	4.67486	25420	10697	2.626	33944	4340	5.498
scNanoCT&ATAC-seq	H3K27ac	ATAC	GM12878-H3K27ac-4#37_10	32771934	6305	5197.8	6260	6181	6017	98.738	1.01299	4674	2081	2.408	6721	1138	8.204
scNanoCT&ATAC-seq	H3K27ac	ATAC	GM12878-H3K27ac-4#37_11	143937541	30318	4747.6	30140	29590	28183	98.1752	4.40878	22759	9733	2.364	30642	4140	7.114
scNanoCT&ATAC-seq	H3K27ac	ATAC	GM12878-H3K27ac-4#37_12	86291873	17988	4797.2	17907	17640	17094	98.509	2.6596	11410	6358	2.199	21104	3037	6.527
scNanoCT&ATAC-seq	H3K27ac	ATAC	GM12878-H3K27ac-4#37_2	94376882	19316	4885.9	19209	18886	18261	98.3185	2.88318	10577	5461	1.879	24168	3201	6.027
scNanoCT&ATAC-seq	H3K27ac	ATAC	GM12878-H3K27ac-4#37_3	52744394	12975	4065.1	12918	12700	12296	98.3124	1.59825	10667	5234	2.233	12737	2089	6.559
scNanoCT&ATAC-seq	H3K27ac	ATAC	GM12878-H3K27ac-4#37_4	83552875	16472	5072.4	16413	16031	15546	97.6726	2.54378	12953	5987	2.697	16446	2497	5.905
scNanoCT&ATAC-seq	H3K27ac	ATAC	GM12878-H3K27ac-4#37_5	217752755	44079	4940.1	43915	42812	41231	97.4883	6.65155	50662	19489	2.96	27752	1166	3.02
scNanoCT&ATAC-seq	H3K27ac	ATAC	GM12878-H3K27ac-4#37_6	247430775	51361	4817.5	49998	48680	46929	97.3639	7.50391	31669	10051	2.251	57607	5662	6.277
scNanoCT&ATAC-seq	H3K27ac	ATAC	GM12878-H3K27ac-4#37_7	121501836	25423	4779.2	25107	24597	23849	97.9687	3.68986	16783	7186	2.6	28256	3571	6.836
scNanoCT&ATAC-seq	H3K27ac	ATAC	GM12878-H3K27ac-4#37_8	159479881	33651	4739.2	33026	31923	30836	96.6602	4.78091	16510	7930	2.421	42274	4897	4.99
scNanoCT&ATAC-seq	H3K27ac	ATAC	GM12878-H3K27ac-4#38_1	63933904	13218	4836.9	13132	12862	12534	97.944	1.94147	7157	4292	2.046	16593	2421	6.489
scNanoCT&ATAC-seq	H3K27ac	ATAC	GM12878-H3K27ac-4#38_10	113973449	23697	4809.6	23616	23095	22637	97.7939	3.46231	19850	9720	3.126	23217	4298	6.664
scNanoCT&ATAC-seq	H3K27ac	ATAC	GM12878-H3K27ac-4#38_11	181766282	37437	4855.3	37248	36398	35202	97.718	5.52219	22712	10610	3.124	44081	5828	5.714
scNanoCT&ATAC-seq	H3K27ac	ATAC	GM12878-H3K27ac-4#38_12	42558796	12666	3360.1	12621	12369	12157	98.0033	1.26508	9028	4108	2.621	14365	2095	6.026
scNanoCT&ATAC-seq	H3K27ac	ATAC	GM12878-H3K27ac-4#38_2	176194609	35150	5012.6	34929	34248	33042	98.0503	5.39247	29807	11436	2.561	32995	5354	6.828
scNanoCT&ATAC-seq	H3K27ac	ATAC	GM12878-H3K27ac-4#38_3	44478289	10496	4237.6	10424	10196	9864	97.8127	1.33348	8500	3322	3.247	10046	1442	9.527
scNanoCT&ATAC-seq	H3K27ac	ATAC	GM12878-H3K27ac-4#38_4	94606459	18935	4996.4	18859	18348	17820	97.2904	2.8706	15957	6043	2.565	17681	2281	5.832
scNanoCT&ATAC-seq	H3K27ac	ATAC	GM12878-H3K27ac-4#38_5	132095195	26838	4921.9	26708	26251	25421	98.2889	4.06299	20668	10750	2.398	27729	5119	6.182
scNanoCT&ATAC-seq	H3K27ac	ATAC	GM12878-H3K27ac-4#38_6	132900868	32301	4114.5	31279	30473	29552	97.4232	3.95294	25291	8082	2.153	30936	3116	4.296
scNanoCT&ATAC-seq	H3K27ac	ATAC	GM12878-H3K27ac-4#38_7	210500793	44585	4721.3	44058	43044	42079	97.6985	6.36591	37387	16709	3.024	42227	4856	5.811
scNanoCT&ATAC-seq	H3K27ac	ATAC	GM12878-H3K27ac-4#38_8	290988574	62378	4664.9	61556	60273	58660	97.9157	8.85318	47238	20634	1.988	64483	8726	5.527
scNanoCT&ATAC-seq	H3K27ac	ATAC	GM12878-H3K27ac-4#38_9	127760999	26907	4748.2	26535	26204	25590	98.7526	3.92888	21604	8383	2.169	26990	3850	6.237
scNanoCT&ATAC-seq	H3K27ac	ATAC	GM12878-H3K27ac-4#39_1	267883661	57043	4696.2	56778	55428	53565	97.6223	8.16092	36785	16542	2.774	64927	9772	6.239
scNanoCT&ATAC-seq	H3K27ac	ATAC	GM12878-H3K27ac-4#39_10	162312399	32378	5013	32278	31615	30834	97.946	4.97832	20990	8037	2.176	37717	4612	5.616
scNanoCT&ATAC-seq	H3K27ac	ATAC	GM12878-H3K27ac-4#39_11	38718044	7649	5061.8	7556	7414	7131	98.1207	1.18169	5356	2451	3.099	8048	1338	10.472
scNanoCT&ATAC-seq	H3K27ac	ATAC	GM12878-H3K27ac-4#39_12	111508244	23346	4776.3	23221	22572	21841	97.2051	3.37585	17919	7350	2.185	23632	3113	5.845
scNanoCT&ATAC-seq	H3K27ac	ATAC	GM12878-H3K27ac-4#39_2	84747737	16799	5044.8	16697	16244	15567	97.2869	2.56926	12716	5538	3.091	16830	2546	6.469
scNanoCT&ATAC-seq	H3K27ac	ATAC	GM12878-H3K27ac-4#39_3	119834570	29789	4022.8	29640	28910	27787	97.5371	3.60368	27359	9913	2.171	25464	2935	5.894
scNanoCT&ATAC-seq	H3K27ac	ATAC	GM12878-H3K27ac-4#39_4	67649450	12721	5317.9	12668	12465	12090	98.3975	2.09468	6236	2842	2.965	16421	1804	7.484
scNanoCT&ATAC-seq	H3K27ac	ATAC	GM12878-H3K27ac-4#39_5	89549574	17149	5221.9	17094	16743	16135	97.9466	2.74354	10392	5512	2.271	20212	3565	7.772
scNanoCT&ATAC-seq	H3K27ac	ATAC	GM12878-H3K27ac-4#39_6	46599151	9662	4822.9	8419	8130	7925	96.5673	1.37098	1427	769	2.945	13358	3003	7.888
scNanoCT&ATAC-seq	H3K27ac	ATAC	GM12878-H3K27ac-4#39_7	94443302	19627	4811.9	19284	18977	18441	98.408	2.874	12709	6655	2.549	22221	2926	6.535
scNanoCT&ATAC-seq	H3K27ac	ATAC	GM12878-H3K27ac-4#39_8	77639380	16364	4744.5	16035	15746	15290	98.1977	2.36692	13095	6605	2.605	15869	2766	6.99
scNanoCT&ATAC-seq	H3K27ac	ATAC	GM12878-H3K27ac-4#39_9	137226050	29278	4687	28628	27831	26933	97.216	4.1116	20217	7192	2.62	30983	3661	6.385
scNanoCT&ATAC-seq	H3K27ac	ATAC	GM12878-H3K27ac-4#40_1	147883849	30383	4867.3	30238	29460	28246	97.4271	4.48819	21547	11750	3.055	31867	5038	8.303
scNanoCT&ATAC-seq	H3K27ac	ATAC	GM12878-H3K27ac-4#40_10	120851527	24334	4966.4	24226	23751	22947	98.0393	3.70532	15451	6935	2.494	28283	3726	6.23
scNanoCT&ATAC-seq	H3K27ac	ATAC	GM12878-H3K27ac-4#40_11	108919847	21656	5029.5	21516	20952	20115	97.3787	3.31692	14833	6041	2.734	23282	4128	6.604
scNanoCT&ATAC-seq	H3K27ac	ATAC	GM12878-H3K27ac-4#40_12	84625544	17360	4874.7	17192	16793	16070	97.6792	2.58232	12318	6403	2.959	18278	3295	7.773
scNanoCT&ATAC-seq	H3K27ac	ATAC	GM12878-H3K27ac-4#40_2	62651816	11819	5300.9	11714	11500	11001	98.1731	1.92716	5630	3229	2.215	14652	3171	8.573
scNanoCT&ATAC-seq	H3K27ac	ATAC	GM12878-H3K27ac-4#40_3	121486996	29196	4161.1	29065	28364	27045	97.5882	3.66699	24192	8656	3.079	27097	3673	7.733
scNanoCT&ATAC-seq	H3K27ac	ATAC	GM12878-H3K27ac-4#40_4	353285397	71527	4939.2	71304	70264	66994	98.5415	10.9065	57140	22648	2.444	70245	10663	6.975
scNanoCT&ATAC-seq	H3K27ac	ATAC	GM12878-H3K27ac-4#40_5	106956897	21113	5065.9	21042	20625	19655	98.0182	3.28824	15148	7619	2.984	22288	3712	7.6
scNanoCT&ATAC-seq	H3K27ac	ATAC	GM12878-H3K27ac-4#40_6	114068372	24079	4737.3	22869	22348	21415	97.7218	3.44243	9169	5202	2.859	31467	3596	5.666
scNanoCT&ATAC-seq	H3K27ac	ATAC	GM12878-H3K27ac-4#40_7	145111121	30464	4763.4	30095	29337	27903	97.4813	4.39231	20869	8135	2.89	32120	4232	6.098
scNanoCT&ATAC-seq	H3K27ac	ATAC	GM12878-H3K27ac-4#40_8	247348365	53899	4589.1	52199	50433	48234	96.6168	7.381	34068	13667	2.623	57838	4935	4.95
scNanoCT&ATAC-seq	H3K27ac	ATAC	GM12878-H3K27ac-4#40_9	102036554	21297	4791.1	20458	19964	19204	97.5853	3.0722	12756	6537	2.724	23581	3676	6.639
scNanoCT&ATAC-seq	H3K9me3	ATAC	GM12878-H3K9me3-1#33_10	88237716	17220	5124.1	16671	14467	13508	86.7794	2.37293	14706	6193	2.863	10198	956	8.045
scNanoCT&ATAC-seq	H3K9me3	ATAC	GM12878-H3K9me3-1#33_11	166858753	33411	4994.1	32678	29398	27234	89.9627	4.66969	22524	8937	1.702	28100	4341	6.028
scNanoCT&ATAC-seq	H3K9me3	ATAC	GM12878-H3K9me3-1#33_12	156875273	31547	4972.7	31084	27607	25693	88.8142	4.37002	20979	8514	2.62	26586	4236	6.935
scNanoCT&ATAC-seq	H3K9me3	ATAC	GM12878-H3K9me3-1#33_3	52136329	11961	4358.9	11827	10404	9933	87.9682	1.41129	9063	4017	2.166	9128	1569	10.3
scNanoCT&ATAC-seq	H3K9me3	ATAC	GM12878-H3K9me3-1#33_4	56464467	11071	5100.2	10937	9640	9111	88.1412	1.53771	10360	4512	3.274	6027	346	9.225
scNanoCT&ATAC-seq	H3K9me3	ATAC	GM12878-H3K9me3-1#33_5	187426763	39480	4747.4	39086	34488	32328	88.2362	5.16003	23693	9331	2.22	36534	2937	5.008
scNanoCT&ATAC-seq	H3K9me3	ATAC	GM12878-H3K9me3-1#33_6	61636189	12678	4861.7	11146	10507	9979	94.267	1.79949	1905	1027	1.747	16635	2430	6.921
scNanoCT&ATAC-seq	H3K9me3	ATAC	GM12878-H3K9me3-1#33_7	138659036	31315	4427.9	26936	24498	22696	90.9489	3.83829	23722	9522	2.357	17930	3339	8.432
scNanoCT&ATAC-seq	H3K9me3	ATAC	GM12878-H3K9me3-1#33_8	232008057	47591	4875	46023	41395	38585	89.9442	6.51259	32469	13511	2.249	38792	6192	6.915
scNanoCT&ATAC-seq	H3K9me3	ATAC	GM12878-H3K9me3-1#33_9	159247415	32336	4924.8	31080	27283	25381	87.7831	4.34871	23095	9272	2.363	23269	3377	6.935
scNanoCT&ATAC-seq	H3K9me3	ATAC	GM12878-H3K9me3-1#34_1	76359818	14819	5152.8	14388	13505	12730	93.8629	2.2366	4467	2198	2.055	19368	2650	7.779
scNanoCT&ATAC-seq	H3K9me3	ATAC	GM12878-H3K9me3-1#34_10	59549041	11463	5194.9	11145	10407	9716	93.3782	1.7299	3899	2222	3.116	14045	2334	5.97
scNanoCT&ATAC-seq	H3K9me3	ATAC	GM12878-H3K9me3-1#34_11	176715684	36331	4864	35463	31208	28845	88.0016	4.8363	24007	10500	2.695	29349	3844	6.089
scNanoCT&ATAC-seq	H3K9me3	ATAC	GM12878-H3K9me3-1#34_12	496904033	101308	4904.9	100010	89683	82841	89.674	13.8639	65542	26123	2.984	87544	11714	6.012
scNanoCT&ATAC-seq	H3K9me3	ATAC	GM12878-H3K9me3-1#34_2	107098258	20910	5121.9	20392	17963	16739	88.0885	2.94077	12444	5195	2.054	18178	2688	9.411
scNanoCT&ATAC-seq	H3K9me3	ATAC	GM12878-H3K9me3-1#34_3	201012581	48553	4140.1	47998	42012	39091	87.5286	5.44519	38071	13096	1.875	34094	4023	4.351
scNanoCT&ATAC-seq	H3K9me3	ATAC	GM12878-H3K9me3-1#34_5	722215326	152302	4742	150966	132803	122421	87.9688	19.8356	112903	34353	1.728	114276	8251	4.824
scNanoCT&ATAC-seq	H3K9me3	ATAC	GM12878-H3K9me3-1#34_6	199286138	63661	3130.4	38422	33862	31130	88.1318	5.2113	27531	11677	1.914	29881	5262	6.446
scNanoCT&ATAC-seq	H3K9me3	ATAC	GM12878-H3K9me3-1#34_8	70597084	17294	4082.2	13119	12290	11458	93.6809	2.01878	2948	1351	3.607	18106	2968	7.857
scNanoCT&ATAC-seq	H3K9me3	ATAC	GM12878-H3K9me3-1#34_9	128000798	28263	4528.9	25274	21638	19893	85.6137	3.35093	19797	8751	2.913	15939	2327	6.853
scNanoCT&ATAC-seq	H3K9me3	ATAC	GM12878-H3K9me3-1#35_1	221932797	46020	4822.5	45346	40350	37070	88.9825	6.11507	37049	14990	2.705	31615	4409	7.556
scNanoCT&ATAC-seq	H3K9me3	ATAC	GM12878-H3K9me3-1#35_10	201515578	40434	4983.8	39970	35108	32113	87.8359	5.53697	25343	10572	1.82	33984	5214	7.182
scNanoCT&ATAC-seq	H3K9me3	ATAC	GM12878-H3K9me3-1#35_11	191050394	38275	4991.5	37648	33719	30717	89.5639	5.34012	27205	11755	2.789	29597	4541	8.631
scNanoCT&ATAC-seq	H3K9me3	ATAC	GM12878-H3K9me3-1#35_12	202745655	42155	4809.5	41530	36966	33734	89.0104	5.61659	30622	11892	2.447	31577	4765	8.23
scNanoCT&ATAC-seq	H3K9me3	ATAC	GM12878-H3K9me3-1#35_3	124168336	28596	4342.2	28334	24438	22631	86.2497	3.30546	21563	8666	2.805	20018	2486	6.927
scNanoCT&ATAC-seq	H3K9me3	ATAC	GM12878-H3K9me3-1#35_5	148576559	28977	5127.4	28634	24559	22634	85.7687	3.98438	22368	10233	2.726	19211	2984	7.775
scNanoCT&ATAC-seq	H3K9me3	ATAC	GM12878-H3K9me3-1#35_7	94500172	23099	4091.1	17159	16228	15174	94.5743	2.70086	2577	1455	1.528	25377	3323	7.013
scNanoCT&ATAC-seq	H3K9me3	ATAC	GM12878-H3K9me3-1#35_8	112190091	22835	4913.1	21839	18716	17165	85.6999	2.97658	18218	7205	2.074	13220	1326	6.866
scNanoCT&ATAC-seq	H3K9me3	ATAC	GM12878-H3K9me3-1#35_9	117491992	23937	4908.4	22139	20068	18532	90.6455	3.27668	13268	6690	3.16	20830	2581	6.912
scNanoCT&ATAC-seq	H3K9me3	ATAC	GM12878-H3K9me3-1#36_1	114475669	23825	4804.9	23142	20207	18838	87.3174	3.09852	18164	8342	2.938	16388	2758	7.986
scNanoCT&ATAC-seq	H3K9me3	ATAC	GM12878-H3K9me3-1#36_10	152659897	30035	5082.7	29510	27122	25301	91.9078	4.37861	11571	6594	2.56	35813	6446	7.515
scNanoCT&ATAC-seq	H3K9me3	ATAC	GM12878-H3K9me3-1#36_11	242242230	49155	4928.1	48368	42366	38937	87.591	6.5667	33985	15617	2.619	36900	6305	7.828
scNanoCT&ATAC-seq	H3K9me3	ATAC	GM12878-H3K9me3-1#36_12	190758208	40814	4673.8	39905	36527	33710	91.5349	5.41584	23294	10849	2.709	38314	6363	7.391
scNanoCT&ATAC-seq	H3K9me3	ATAC	GM12878-H3K9me3-1#36_3	30950731	7257	4264.9	7063	6651	6395	94.1668	0.89858	1778	900	1.76	9928	1361	7.896
scNanoCT&ATAC-seq	H3K9me3	ATAC	GM12878-H3K9me3-1#36_4	179099033	35668	5021.3	35333	31433	29609	88.9622	4.99954	25601	10131	2.389	28711	4385	7.81
scNanoCT&ATAC-seq	H3K9me3	ATAC	GM12878-H3K9me3-1#36_5	32542927	6319	5150	6105	5712	5401	93.5627	0.947787	1608	931	1.641	8358	1359	7.502
scNanoCT&ATAC-seq	H3K9me3	ATAC	GM12878-H3K9me3-1#36_6	84277033	19651	4288.7	16071	13934	13012	86.7028	2.23141	10854	5069	3.856	13038	1776	6.276
scNanoCT&ATAC-seq	H3K9me3	ATAC	GM12878-H3K9me3-1#36_8	260018893	53986	4816.4	51187	45772	42466	89.4211	7.20422	44928	18899	2.68	33213	5151	9.541
scNanoCT&ATAC-seq	H3K9me3	ATAC	GM12878-H3K9me3-1#36_9	119300049	37213	3205.9	23325	20577	18974	88.2186	3.07078	16253	7366	3.35	18389	1982	5.964
scNanoCT&ATAC-seq	H3K9me3	ATAC	GM12878-H3K9me3-1#37_1	116281652	24703	4707.2	23830	21602	20001	90.6504	3.25995	23454	9262	2.148	13703	970	4.571
scNanoCT&ATAC-seq	H3K9me3	ATAC	GM12878-H3K9me3-1#37_10	492892385	98364	5010.9	97534	86104	78926	88.281	13.5825	68643	30956	2.424	76957	13146	7.419
scNanoCT&ATAC-seq	H3K9me3	ATAC	GM12878-H3K9me3-1#37_11	226818047	46465	4881.5	45879	41047	37411	89.4679	6.35744	29806	11892	2.766	39364	6078	5.551
scNanoCT&ATAC-seq	H3K9me3	ATAC	GM12878-H3K9me3-1#37_12	206794898	41292	5008.1	40838	36942	33931	90.4599	5.84707	25377	11917	2.23	37257	6411	7.729
scNanoCT&ATAC-seq	H3K9me3	ATAC	GM12878-H3K9me3-1#37_2	199810723	38787	5151.5	38370	33800	31257	88.0897	5.51956	28700	10176	2.979	28530	4340	8.194
scNanoCT&ATAC-seq	H3K9me3	ATAC	GM12878-H3K9me3-1#37_3	62814477	12917	4862.9	12742	11182	10470	87.757	1.69586	10206	4644	2.122	8904	1352	6.884
scNanoCT&ATAC-seq	H3K9me3	ATAC	GM12878-H3K9me3-1#37_5	123466843	24034	5137.2	23763	20831	19180	87.6615	3.37869	20468	9016	2.766	14687	1981	7.48
scNanoCT&ATAC-seq	H3K9me3	ATAC	GM12878-H3K9me3-1#37_7	96412837	26062	3699.4	17661	15343	14182	86.875	2.46596	14569	6799	2.057	11171	1075	5.382
scNanoCT&ATAC-seq	H3K9me3	ATAC	GM12878-H3K9me3-1#37_8	129071186	31950	4039.8	24841	22126	20348	89.0705	3.4821	17919	8494	3.286	19404	2485	8.124
scNanoCT&ATAC-seq	H3K9me3	ATAC	GM12878-H3K9me3-1#37_9	129513776	25694	5040.6	24702	23150	21415	93.7171	3.79065	4760	2755	1.835	34881	4951	5.012
scNanoCT&ATAC-seq	H3K9me3	ATAC	GM12878-H3K9me3-1#38_1	51576273	9905	5207.1	9609	9295	8724	96.7322	1.5487	1921	1116	1.485	14308	2368	7.51
scNanoCT&ATAC-seq	H3K9me3	ATAC	GM12878-H3K9me3-1#38_10	343813128	67452	5097.2	66744	58006	53402	86.9082	9.35602	45636	17877	2.642	52733	6818	6.488
scNanoCT&ATAC-seq	H3K9me3	ATAC	GM12878-H3K9me3-1#38_11	250203835	52309	4783.2	51605	44970	41061	87.1427	6.84317	33901	14081	2.191	41660	6367	6.454
scNanoCT&ATAC-seq	H3K9me3	ATAC	GM12878-H3K9me3-1#38_12	98725998	19411	5086.1	19107	17295	16108	90.5166	2.77764	13038	6150	2.824	16619	1820	7.862
scNanoCT&ATAC-seq	H3K9me3	ATAC	GM12878-H3K9me3-1#38_2	63082089	24254	2600.9	23586	21921	20016	92.9407	1.74182	14992	2296	1.351	24433	368	1.478
scNanoCT&ATAC-seq	H3K9me3	ATAC	GM12878-H3K9me3-1#38_3	152460026	35404	4306.3	34948	30974	28748	88.6288	4.18418	30733	11079	1.842	22033	3630	7.609
scNanoCT&ATAC-seq	H3K9me3	ATAC	GM12878-H3K9me3-1#38_4	251206984	48895	5137.7	48390	42612	39909	88.0595	6.9108	34595	14474	2.478	38482	4832	6.898
scNanoCT&ATAC-seq	H3K9me3	ATAC	GM12878-H3K9me3-1#38_5	274203401	54957	4989.4	54419	47947	44201	88.1071	7.59842	38917	14490	2.172	42622	6540	6.676
scNanoCT&ATAC-seq	H3K9me3	ATAC	GM12878-H3K9me3-1#38_6	175911107	38666	4549.5	34830	29861	27406	85.7336	4.70134	26978	9991	3.141	23272	3028	6.163
scNanoCT&ATAC-seq	H3K9me3	ATAC	GM12878-H3K9me3-1#38_7	196359295	54659	3592.4	38624	32684	30081	84.621	4.97021	26689	11105	2.248	27860	3675	7.192
scNanoCT&ATAC-seq	H3K9me3	ATAC	GM12878-H3K9me3-1#38_8	67578763	54755	1234.2	10075	7938	7436	78.7891	1.29964	2952	1585	2.552	10598	1552	8.205
scNanoCT&ATAC-seq	H3K9me3	ATAC	GM12878-H3K9me3-1#38_9	113429566	27394	4140.7	21527	19573	18194	90.923	3.14206	15021	7379	3.225	18315	2085	8.921
scNanoCT&ATAC-seq	H3K9me3	ATAC	GM12878-H3K9me3-1#39_10	188937184	38223	4943	37624	34108	31617	90.6549	5.33023	20635	9354	2.568	38006	4096	5.121
scNanoCT&ATAC-seq	H3K9me3	ATAC	GM12878-H3K9me3-1#39_11	129260694	28350	4559.5	25808	22133	20259	85.7602	3.41932	17410	8132	1.602	19671	3516	7.71
scNanoCT&ATAC-seq	H3K9me3	ATAC	GM12878-H3K9me3-1#39_12	187116710	39182	4775.6	38462	34720	31841	90.2709	5.25706	22587	10056	3.22	36230	5775	6.869
scNanoCT&ATAC-seq	H3K9me3	ATAC	GM12878-H3K9me3-1#39_2	159736415	32284	4947.9	31677	27390	25285	86.4665	4.27803	23814	10551	2.696	22246	3316	9.036
scNanoCT&ATAC-seq	H3K9me3	ATAC	GM12878-H3K9me3-1#39_5	147324091	28960	5087.2	28625	26397	24449	92.2166	4.24576	20675	9245	2.81	24279	3872	10.526
scNanoCT&ATAC-seq	H3K9me3	ATAC	GM12878-H3K9me3-1#39_6	100838903	34473	2925.2	19790	16785	15447	84.8156	2.70371	6030	3429	2.248	22569	3932	6.95
scNanoCT&ATAC-seq	H3K9me3	ATAC	GM12878-H3K9me3-1#39_7	212554566	49278	4313.4	43019	39044	35757	90.7599	5.93033	28802	11415	2.461	36843	5641	6.915
scNanoCT&ATAC-seq	H3K9me3	ATAC	GM12878-H3K9me3-1#39_8	131832410	62317	2115.5	21847	19736	18428	90.3373	3.28321	3386	1587	2.574	30802	4578	7.409
scNanoCT&ATAC-seq	H3K9me3	ATAC	GM12878-H3K9me3-1#39_9	322723851	76822	4200.9	60956	55466	51155	90.9935	9.0243	26718	12480	2.546	67790	10566	7.654
scNanoCT&ATAC-seq	H3K9me3	ATAC	GM12878-H3K9me3-1#40_10	195178689	39256	4971.9	38816	33434	30472	86.1346	5.22864	32364	13492	2.167	23632	3564	7.112
scNanoCT&ATAC-seq	H3K9me3	ATAC	GM12878-H3K9me3-1#40_11	118147490	23572	5012.2	23032	21146	19421	91.8114	3.39208	11617	5897	1.713	24218	3886	7.253
scNanoCT&ATAC-seq	H3K9me3	ATAC	GM12878-H3K9me3-1#40_12	99401510	19711	5042.9	19340	17161	15745	88.7332	2.74124	12872	5994	2.109	16210	2003	6.453
scNanoCT&ATAC-seq	H3K9me3	ATAC	GM12878-H3K9me3-1#40_2	108110954	22963	4708.1	22317	19531	17835	87.5162	2.92392	13884	6717	2.518	18768	2605	6.118
scNanoCT&ATAC-seq	H3K9me3	ATAC	GM12878-H3K9me3-1#40_3	79695400	19115	4169.3	18866	16250	15053	86.1338	2.09872	13934	6608	2.544	13390	2149	8.814
scNanoCT&ATAC-seq	H3K9me3	ATAC	GM12878-H3K9me3-1#40_4	38156960	7139	5344.9	7062	6827	6422	96.6723	1.15621	1372	754	3.253	10224	1367	6.249
scNanoCT&ATAC-seq	H3K9me3	ATAC	GM12878-H3K9me3-1#40_6	183598775	48270	3803.6	34443	30068	27338	87.2979	4.80533	27079	10855	2.29	22959	4262	7.946
scNanoCT&ATAC-seq	H3K9me3	ATAC	GM12878-H3K9me3-1#40_7	227597308	51725	4400.1	44541	40572	36984	91.0891	6.33519	30093	13949	3.236	38268	6035	7.973
scNanoCT&ATAC-seq	H3K9me3	ATAC	GM12878-H3K9me3-1#40_8	357229666	78668	4541	74093	65281	59206	88.1068	9.84498	55462	18683	2.378	54137	7221	6.099
scNanoCT&ATAC-seq	H3K9me3	ATAC	GM12878-H3K9me3-1#40_9	221242843	53611	4126.8	42353	37371	34162	88.237	5.91066	31511	14369	3.336	31142	4624	7.625
scNanoCT&ATAC-seq	H3K9me3	ATAC	GM12878-H3K9me3-2#41_10	76098298	21927	3470.5	20762	18994	18047	91.4844	2.11576	15554	5919	1.733	17056	1894	5.509
scNanoCT&ATAC-seq	H3K9me3	ATAC	GM12878-H3K9me3-2#41_11	98524795	56725	1736.9	25848	21535	20260	83.314	2.26202	17201	6550	2.296	19349	2207	6.219
scNanoCT&ATAC-seq	H3K9me3	ATAC	GM12878-H3K9me3-2#41_12	75650565	21272	3556.3	20945	18208	17251	86.9324	2.03269	16054	6207	2.189	14787	2102	8.523
scNanoCT&ATAC-seq	H3K9me3	ATAC	GM12878-H3K9me3-2#41_2	65302485	18548	3520.7	18047	15552	14670	86.175	1.72618	14194	5549	2.515	12313	1773	5.858
scNanoCT&ATAC-seq	H3K9me3	ATAC	GM12878-H3K9me3-2#41_5	63804632	17021	3748.6	16690	15034	14374	90.0779	1.77397	10101	4569	2.458	15827	1990	4.972
scNanoCT&ATAC-seq	H3K9me3	ATAC	GM12878-H3K9me3-2#41_6	41607409	62636	664.3	6813	4228	4027	62.0578	0.47217	2345	1160	1.391	4677	590	6.58
scNanoCT&ATAC-seq	H3K9me3	ATAC	GM12878-H3K9me3-2#41_7	48598373	62983	771.6	7096	5899	5628	83.1313	0.683774	3423	1652	1.938	6378	936	4.305
scNanoCT&ATAC-seq	H3K9me3	ATAC	GM12878-H3K9me3-2#41_9	92757588	86635	1070.7	19851	17144	16022	86.3634	1.80579	14238	5432	2.73	14693	2079	5.068
scNanoCT&ATAC-seq	H3K9me3	ATAC	GM12878-H3K9me3-2#42_1	76033711	48042	1582.7	13527	12216	11297	90.3083	1.75087	4179	2053	2.654	16233	2231	8.211
scNanoCT&ATAC-seq	H3K9me3	ATAC	GM12878-H3K9me3-2#42_10	200831132	44103	4553.7	43314	38617	35263	89.1559	5.58049	28434	11475	2.552	35886	5514	7.235
scNanoCT&ATAC-seq	H3K9me3	ATAC	GM12878-H3K9me3-2#42_11	59735916	21432	2787.2	11686	10210	9464	87.3695	1.52586	8884	3996	2.32	8116	888	7.715
scNanoCT&ATAC-seq	H3K9me3	ATAC	GM12878-H3K9me3-2#42_12	68581541	15280	4488.3	14351	12490	11469	87.0323	1.84348	11575	5138	2.735	9120	914	7.506
scNanoCT&ATAC-seq	H3K9me3	ATAC	GM12878-H3K9me3-2#42_2	132523316	31341	4228.4	30839	26719	24371	86.6403	3.55806	21821	8598	2.482	22367	3043	6.338
scNanoCT&ATAC-seq	H3K9me3	ATAC	GM12878-H3K9me3-2#42_3	287128028	69791	4114.1	68985	59443	54062	86.168	7.59539	61045	24496	2.023	38011	5499	7.486
scNanoCT&ATAC-seq	H3K9me3	ATAC	GM12878-H3K9me3-2#42_8	148536686	78841	1884	28320	24193	22085	85.4273	3.46941	16366	7136	2.825	23505	3579	7.019
scNanoCT&ATAC-seq	H3K9me3	ATAC	GM12878-H3K9me3-2#42_9	153282774	65835	2328.3	29952	26192	23897	87.4466	3.7895	22212	8811	2.769	20704	2453	7.611
scNanoCT&ATAC-seq	H3K9me3	ATAC	GM12878-H3K9me3-2#43_1	170113054	37067	4589.3	36091	31117	28410	86.2182	4.56107	24780	10768	2.36	26676	3921	7.627
scNanoCT&ATAC-seq	H3K9me3	ATAC	GM12878-H3K9me3-2#43_10	176122438	36739	4793.9	35579	32193	29621	90.4832	4.99281	18320	8635	2.809	35548	5679	7.408
scNanoCT&ATAC-seq	H3K9me3	ATAC	GM12878-H3K9me3-2#43_11	147975849	40651	3640.2	31098	26801	24531	86.1824	3.96106	22494	8786	2.419	22062	2789	7.436
scNanoCT&ATAC-seq	H3K9me3	ATAC	GM12878-H3K9me3-2#43_12	328959951	70751	4649.5	70100	63258	57391	90.2397	9.25995	54872	21333	1.832	49712	8530	8.092
scNanoCT&ATAC-seq	H3K9me3	ATAC	GM12878-H3K9me3-2#43_2	146150183	31096	4700	30661	29129	26720	95.0034	4.32811	6562	2619	2.622	42143	5026	5.747
scNanoCT&ATAC-seq	H3K9me3	ATAC	GM12878-H3K9me3-2#43_5	99404262	20316	4892.9	19670	17641	16314	89.6848	2.77951	14295	6668	2.897	15592	2148	7.147
scNanoCT&ATAC-seq	H3K9me3	ATAC	GM12878-H3K9me3-2#43_6	201588847	100823	1999.4	39336	32332	29108	82.1944	4.70797	22760	10269	2.833	29985	5144	6.52
scNanoCT&ATAC-seq	H3K9me3	ATAC	GM12878-H3K9me3-2#43_8	60812178	16566	3670.9	11725	10744	9937	91.6333	1.69843	3408	1975	1.98	14750	2397	7.322
scNanoCT&ATAC-seq	H3K9me3	ATAC	GM12878-H3K9me3-2#43_9	74211144	81898	906.1	9067	8327	7730	91.8385	1.25784	2739	1443	1.574	11130	1458	9.041
scNanoCT&ATAC-seq	H3K9me3	ATAC	GM12878-H3K9me3-2#44_10	176153523	37620	4682.4	37122	32281	29429	86.9592	4.78145	24547	9266	1.729	28669	4004	6.883
scNanoCT&ATAC-seq	H3K9me3	ATAC	GM12878-H3K9me3-2#44_11	244138290	54831	4452.6	53559	47453	42983	88.5995	6.70121	38438	16867	2.658	39667	6799	6.906
scNanoCT&ATAC-seq	H3K9me3	ATAC	GM12878-H3K9me3-2#44_12	163071693	36497	4468.1	35697	31693	28687	88.7834	4.50888	21955	9152	2.758	30458	5594	7.156
scNanoCT&ATAC-seq	H3K9me3	ATAC	GM12878-H3K9me3-2#44_2	56233819	11916	4719.2	11569	10961	10140	94.7446	1.65327	3751	1936	2.506	14702	2400	8.664
scNanoCT&ATAC-seq	H3K9me3	ATAC	GM12878-H3K9me3-2#44_3	259860061	62960	4127.4	62131	54718	50120	88.0688	7.04245	46094	19351	2.149	44817	7139	6.54
scNanoCT&ATAC-seq	H3K9me3	ATAC	GM12878-H3K9me3-2#44_4	197884992	42497	4656.4	42029	37124	34232	88.3295	5.4175	33128	15216	2.465	28552	3933	7.311
scNanoCT&ATAC-seq	H3K9me3	ATAC	GM12878-H3K9me3-2#44_5	164729685	35438	4648.4	34967	30097	27358	86.0726	4.41736	26820	10788	2.445	22851	3760	6.151
scNanoCT&ATAC-seq	H3K9me3	ATAC	GM12878-H3K9me3-2#44_7	594822226	174252	3413.6	128277	112894	100713	88.008	15.8174	87762	36723	2.003	95434	15470	6.414
scNanoCT&ATAC-seq	H3K9me3	ATAC	GM12878-H3K9me3-2#44_8	62511150	24113	2592.4	11695	10835	10095	92.6464	1.65969	2802	1531	4.265	15306	2482	6.842
scNanoCT&ATAC-seq	H3K9me3	ATAC	GM12878-H3K9me3-2#44_9	152248731	60385	2521.3	31247	27398	24701	87.682	3.82341	23974	10390	3.154	20760	3931	7.381
scNanoCT&ATAC-seq	H3K9me3	ATAC	GM12878-H3K9me3-2#45_1	84571014	25627	3300.1	19903	17303	16030	86.9366	2.20055	16785	6873	2.443	12053	2132	6.024
scNanoCT&ATAC-seq	H3K9me3	ATAC	GM12878-H3K9me3-2#45_10	131293573	31824	4125.6	30544	26815	24980	87.7914	3.55599	21817	9181	2.492	22996	3573	7.366
scNanoCT&ATAC-seq	H3K9me3	ATAC	GM12878-H3K9me3-2#45_11	57448262	20522	2799.4	13695	11821	10850	86.3162	1.48431	9689	4012	2.171	9815	1678	6.992
scNanoCT&ATAC-seq	H3K9me3	ATAC	GM12878-H3K9me3-2#45_12	37525927	9707	3865.9	8573	7682	7198	89.6069	1.01428	6166	2875	2.574	6797	785	5.496
scNanoCT&ATAC-seq	H3K9me3	ATAC	GM12878-H3K9me3-2#45_3	86717774	21697	3996.8	21315	18642	17387	87.4595	2.33486	18133	7794	3.218	13235	1869	6.421
scNanoCT&ATAC-seq	H3K9me3	ATAC	GM12878-H3K9me3-2#45_4	76896413	17804	4319.1	17502	15518	14663	88.6642	2.11668	11637	4817	2.82	14729	2088	5.385
scNanoCT&ATAC-seq	H3K9me3	ATAC	GM12878-H3K9me3-2#45_5	78293821	18610	4207.1	17861	15766	14751	88.2705	2.12764	15434	5871	1.876	11145	1697	7.831
scNanoCT&ATAC-seq	H3K9me3	ATAC	GM12878-H3K9me3-2#45_7	67300272	78216	860.4	9844	8084	7648	82.1211	1.08827	3501	1811	3.08	10031	1460	7.16
scNanoCT&ATAC-seq	H3K9me3	ATAC	GM12878-H3K9me3-2#45_9	125556533	173891	722	17094	12391	11555	72.4874	1.56158	6331	3111	1.842	14368	2247	6.604
scNanoCT&ATAC-seq	H3K9me3	ATAC	GM12878-H3K9me3-2#46_10	46476266	11262	4126.8	10597	9452	8762	89.1951	1.27623	7350	3311	3.493	8396	1222	6.766
scNanoCT&ATAC-seq	H3K9me3	ATAC	GM12878-H3K9me3-2#46_11	140107906	37243	3762	34061	30265	27619	88.8553	3.81684	25504	8361	1.689	24803	3386	5.329
scNanoCT&ATAC-seq	H3K9me3	ATAC	GM12878-H3K9me3-2#46_12	159167299	37335	4263.2	36716	33280	30753	90.6417	4.46834	24195	9780	2.573	31201	4107	6.742
scNanoCT&ATAC-seq	H3K9me3	ATAC	GM12878-H3K9me3-2#46_2	113137933	27625	4095.5	26683	24105	22164	90.3384	3.15239	14495	7196	2.64	25755	4577	7.298
scNanoCT&ATAC-seq	H3K9me3	ATAC	GM12878-H3K9me3-2#46_3	105002727	27250	3853.3	26761	24449	22543	91.3606	2.94646	17964	7360	2.144	23432	3588	5.152
scNanoCT&ATAC-seq	H3K9me3	ATAC	GM12878-H3K9me3-2#46_4	46363827	10547	4395.9	10272	9866	9333	96.0475	1.37918	1403	764	5.446	15517	1911	4.389
scNanoCT&ATAC-seq	H3K9me3	ATAC	GM12878-H3K9me3-2#46_5	89562930	21986	4073.6	20089	18117	16829	90.1837	2.48812	11317	4972	2.305	19189	3065	6.096
scNanoCT&ATAC-seq	H3K9me3	ATAC	GM12878-H3K9me3-2#46_6	111670591	89560	1246.9	20108	16732	15419	83.2107	2.20753	10777	4839	2.475	16979	2408	7.239
scNanoCT&ATAC-seq	H3K9me3	ATAC	GM12878-H3K9me3-2#46_7	103176964	50881	2027.8	21345	18269	16716	85.5891	2.41337	15463	6673	1.656	14337	2130	7.306
scNanoCT&ATAC-seq	H3K9me3	ATAC	GM12878-H3K9me3-2#46_8	61610648	31801	1937.4	12350	10664	10004	86.3482	1.43884	4015	2140	1.141	14137	1122	5.656
scNanoCT&ATAC-seq	H3K9me3	ATAC	GM12878-H3K9me3-2#47_1	136329859	29415	4634.7	28575	24330	22081	85.1444	3.60251	21235	9173	2.42	18576	2887	8.969
scNanoCT&ATAC-seq	H3K9me3	ATAC	GM12878-H3K9me3-2#47_10	164247697	33900	4845.1	33534	30186	27419	90.0161	4.60944	24712	9881	1.815	25172	4109	5.883
scNanoCT&ATAC-seq	H3K9me3	ATAC	GM12878-H3K9me3-2#47_11	222106545	66816	3324.2	46919	40304	36279	85.9012	5.70814	36965	14564	2.17	28994	4703	6.824
scNanoCT&ATAC-seq	H3K9me3	ATAC	GM12878-H3K9me3-2#47_2	558790917	130032	4297.3	128320	112739	100421	87.8577	15.298	117838	28024	2.3	67962	5719	5.824
scNanoCT&ATAC-seq	H3K9me3	ATAC	GM12878-H3K9me3-2#47_3	123631795	28298	4368.9	27885	24601	22566	88.2231	3.34559	20736	8707	3.02	20614	3261	8.213
scNanoCT&ATAC-seq	H3K9me3	ATAC	GM12878-H3K9me3-2#47_4	231952628	49227	4711.9	48737	42410	38824	87.0181	6.27398	39846	14726	2.395	30885	3563	6.311
scNanoCT&ATAC-seq	H3K9me3	ATAC	GM12878-H3K9me3-2#47_5	234908677	49003	4793.8	47279	42461	38881	89.8094	6.5798	33545	14136	2.739	37484	6177	7.726
scNanoCT&ATAC-seq	H3K9me3	ATAC	GM12878-H3K9me3-2#47_7	148849379	51919	2867	28568	25030	22652	87.6155	3.77183	18122	8193	2.286	22434	3579	7.828
scNanoCT&ATAC-seq	H3K9me3	ATAC	GM12878-H3K9me3-2#47_8	114524574	28547	4011.8	22995	20874	18969	90.7763	3.19863	7296	3620	2.131	26974	3605	4.971
scNanoCT&ATAC-seq	H3K9me3	ATAC	GM12878-H3K9me3-2#47_9	69954417	37995	1841.1	11586	10472	9728	90.3849	1.64437	4245	2266	2.491	13305	2086	8.639
scNanoCT&ATAC-seq	H3K9me3	ATAC	GM12878-H3K9me3-2#48_10	106551354	23875	4462.9	22839	20407	19121	89.3515	2.95821	16027	6542	2.381	18689	3015	7.225
scNanoCT&ATAC-seq	H3K9me3	ATAC	GM12878-H3K9me3-2#48_11	127947585	34072	3755.2	27925	25294	23619	90.5783	3.59269	11366	6306	3.682	31351	4693	5.32
scNanoCT&ATAC-seq	H3K9me3	ATAC	GM12878-H3K9me3-2#48_12	250886564	56770	4419.4	55811	49666	46021	88.9896	6.91958	40798	17214	2.703	42720	7311	7.279
scNanoCT&ATAC-seq	H3K9me3	ATAC	GM12878-H3K9me3-2#48_2	109540666	27792	3941.4	24581	22059	20435	89.74	2.99079	17103	7919	3.343	20158	3466	6.909
scNanoCT&ATAC-seq	H3K9me3	ATAC	GM12878-H3K9me3-2#48_3	60554143	14511	4173	14210	12166	11462	85.6158	1.58682	10500	4631	1.371	10189	1456	6.526
scNanoCT&ATAC-seq	H3K9me3	ATAC	GM12878-H3K9me3-2#48_4	183044487	39576	4625.1	39121	34373	32352	87.8633	5.00931	28763	12462	2.463	29687	5088	6.929
scNanoCT&ATAC-seq	H3K9me3	ATAC	GM12878-H3K9me3-2#48_5	43899903	9249	4746.4	8867	7946	7483	89.6132	1.22314	7478	3467	1.94	6020	849	8.454
scNanoCT&ATAC-seq	H3K9me3	ATAC	GM12878-H3K9me3-2#48_6	201514293	202262	996.3	31925	23587	21703	73.8825	3.25652	17842	8110	2.975	21183	3967	6.895
scNanoCT&ATAC-seq	H3K9me3	ATAC	GM12878-H3K9me3-2#48_7	95911727	72506	1322.8	17171	13960	12879	81.2999	1.90351	11647	5131	3.507	11357	1879	8.052
scNanoCT&ATAC-seq	H3K9me3	ATAC	GM12878-H3K9me3-2#48_8	79717854	68942	1156.3	11200	9844	9433	87.8929	1.5719	1415	564	4.752	15780	2161	5.79
scNanoCT&ATAC-seq	H3K9me3	ATAC	GM12878-H3K9me3-2#48_9	131483300	70125	1875	25284	21029	19569	83.1712	2.95512	15817	6590	1.625	19368	2545	6.211
scNanoCT&ATAC-seq	H3K9me3	ATAC	GM12878-H3K9me3-3#1_1	242380964	59628	4064.9	59146	55964	52164	94.6201	7.04498	32319	11065	2.153	65247	5969	5.023
scNanoCT&ATAC-seq	H3K9me3	ATAC	GM12878-H3K9me3-3#1_3	355902351	86185	4129.5	85563	77786	72263	90.9108	9.96169	36882	13770	2.097	97668	9934	5.091
scNanoCT&ATAC-seq	H3K9me3	ATAC	GM12878-H3K9me3-3#1_4	73969742	15627	4733.5	15482	14266	13158	92.1457	2.10768	8549	3447	1.167	15789	1892	4.001
scNanoCT&ATAC-seq	H3K9me3	ATAC	GM12878-H3K9me3-3#1_5	21983476	4782	4597.1	4663	4410	4096	94.5743	0.629568	1589	639	1.808	6077	616	5.295
scNanoCT&ATAC-seq	H3K9me3	ATAC	GM12878-H3K9me3-3#1_6	79749007	19774	4033	17410	15723	14293	90.3102	2.18459	6722	2847	1.509	19905	1768	4.224
scNanoCT&ATAC-seq	H3K9me3	ATAC	GM12878-H3K9me3-3#2_1	283055991	51866	5457.4	51496	48484	45133	94.151	8.33579	15269	6074	1.682	68909	7256	5.547
scNanoCT&ATAC-seq	H3K9me3	ATAC	GM12878-H3K9me3-3#2_2	190133149	40051	4747.3	39758	37123	34223	93.3724	5.48664	16409	5964	1.914	47742	4615	4.158
scNanoCT&ATAC-seq	H3K9me3	ATAC	GM12878-H3K9me3-3#2_3	210273140	49328	4262.8	49000	44621	41856	91.0633	5.90006	20560	8112	1.973	56725	5008	4.309
scNanoCT&ATAC-seq	H3K9me3	ATAC	GM12878-H3K9me3-3#2_4	82793448	16255	5093.4	16139	14626	13660	90.6252	2.31526	6750	2942	1.452	18675	1874	4.269
scNanoCT&ATAC-seq	H3K9me3	ATAC	GM12878-H3K9me3-3#2_5	443725485	78809	5630.4	78415	74505	68988	95.0137	13.192	32655	14620	2.076	95975	11727	7.497
scNanoCT&ATAC-seq	H3K9me3	ATAC	GM12878-H3K9me3-3#2_6	41024209	9293	4414.5	9085	8169	7455	89.9174	1.09494	4674	1728	1.152	9115	652	4.137
scNanoCT&ATAC-seq	H3K9me3	ATAC	GM12878-H3K9me3-3#2_7	425875629	77853	5470.3	77320	72588	67442	93.88	12.5134	22777	9767	2.485	102749	10338	5.586
scNanoCT&ATAC-seq	H3K9me3	ATAC	GM12878-H3K9me3-3#2_9	588501542	115424	5098.6	114511	105793	96936	92.3868	16.9319	39502	15765	2.135	141844	10402	4.081
scNanoCT&ATAC-seq	H3K9me3	ATAC	GM12878-H3K9me3-3#3_1	670591156	132486	5061.6	131304	119346	108611	90.8929	18.9429	77156	27836	2.003	123123	11263	4.949
scNanoCT&ATAC-seq	H3K9me3	ATAC	GM12878-H3K9me3-3#3_2	175194197	35231	4972.7	34655	32338	29507	93.3141	5.00554	14715	5949	1.715	40208	3920	4.378
scNanoCT&ATAC-seq	H3K9me3	ATAC	GM12878-H3K9me3-3#3_3	259259824	56391	4597.5	55886	51540	47993	92.2235	7.36626	24398	11018	1.995	64005	6768	5.096
scNanoCT&ATAC-seq	H3K9me3	ATAC	GM12878-H3K9me3-3#3_4	205552971	42803	4802.3	42506	37777	34836	88.8745	5.62448	23202	9213	2.156	41232	3593	3.85
scNanoCT&ATAC-seq	H3K9me3	ATAC	GM12878-H3K9me3-3#3_5	481545036	89491	5380.9	88958	82842	75822	93.1248	13.9975	44646	17592	1.862	97100	9165	4.974
scNanoCT&ATAC-seq	H3K9me3	ATAC	GM12878-H3K9me3-3#3_6	249568103	53570	4658.7	52843	48451	44175	91.6886	7.02623	23934	10995	1.6	58248	5634	4.041
scNanoCT&ATAC-seq	H3K9me3	ATAC	GM12878-H3K9me3-3#3_7	675903139	129538	5217.8	128277	119254	108469	92.966	19.613	52450	18372	1.503	149924	12700	4.68
scNanoCT&ATAC-seq	H3K9me3	ATAC	GM12878-H3K9me3-3#3_8	217806656	45985	4736.5	45584	42670	39044	93.6074	6.29169	19596	7459	2.177	53262	4853	4.002
scNanoCT&ATAC-seq	H3K9me3	ATAC	GM12878-H3K9me3-3#3_9	502240050	98401	5104	96849	88837	80566	91.7273	14.2601	48823	18729	1.551	100548	10253	4.918
scNanoCT&ATAC-seq	H3K9me3	ATAC	GM12878-H3K9me3-3#4_1	665889154	133103	5002.8	132139	122784	112298	92.9203	19.2152	79885	28266	1.983	128996	13128	4.954
scNanoCT&ATAC-seq	H3K9me3	ATAC	GM12878-H3K9me3-3#4_11	295827247	53610	5518.1	53003	50543	46934	95.3588	8.81646	19116	7907	2.492	68217	7108	5.434
scNanoCT&ATAC-seq	H3K9me3	ATAC	GM12878-H3K9me3-3#4_2	529697545	99185	5340.5	97700	90384	83161	92.5118	15.2693	41669	16814	2.185	113234	11182	5.732
scNanoCT&ATAC-seq	H3K9me3	ATAC	GM12878-H3K9me3-3#4_3	166162376	34219	4855.9	33912	32095	30280	94.642	4.85759	13776	6309	2.797	42088	4723	5.559
scNanoCT&ATAC-seq	H3K9me3	ATAC	GM12878-H3K9me3-3#4_4	383188119	71456	5362.6	71080	64497	60023	90.7386	10.8445	41343	15653	2.279	69995	2699	3.967
scNanoCT&ATAC-seq	H3K9me3	ATAC	GM12878-H3K9me3-3#4_5	582293315	114016	5107.1	113355	103999	95960	91.7463	16.6744	54201	20577	1.59	124960	11729	4.993
scNanoCT&ATAC-seq	H3K9me3	ATAC	GM12878-H3K9me3-3#4_6	481714535	97447	4943.3	96623	86286	78599	89.3017	13.4014	53974	17794	1.499	91704	7900	4.479
scNanoCT&ATAC-seq	H3K9me3	ATAC	GM12878-H3K9me3-3#4_7	204820169	38549	5313.2	37982	35464	32648	93.3705	5.91224	22092	10501	2.256	38236	4835	7.364
scNanoCT&ATAC-seq	H3K9me3	ATAC	GM12878-H3K9me3-3#4_8	203516305	39487	5154	39209	36318	33726	92.6267	5.86112	17854	7884	1.931	44869	4924	5.673
scNanoCT&ATAC-seq	H3K9me3	ATAC	GM12878-H3K9me3-3#4_9	82235194	20895	3935.6	18125	16673	15387	91.989	2.2778	8568	3737	1.388	20010	1723	4.445
scNanoCT&ATAC-seq	H3K9me3	ATAC	GM12878-H3K9me3-3#5_1	433572241	81717	5305.8	79369	75583	70293	95.2299	12.828	26024	11404	1.915	105157	11257	5.762
scNanoCT&ATAC-seq	H3K9me3	ATAC	GM12878-H3K9me3-3#5_2	462571619	84330	5485.3	83369	77100	70709	92.4804	13.2819	38795	15338	2.532	92273	10271	5.829
scNanoCT&ATAC-seq	H3K9me3	ATAC	GM12878-H3K9me3-3#5_3	115860391	24091	4809.3	23809	22773	21434	95.6487	3.404	6334	3009	1.579	33133	3511	5.186
scNanoCT&ATAC-seq	H3K9me3	ATAC	GM12878-H3K9me3-3#5_4	299412958	53907	5554.3	53601	50212	46761	93.6774	8.76137	25311	11122	2.41	61862	5075	5.198
scNanoCT&ATAC-seq	H3K9me3	ATAC	GM12878-H3K9me3-3#5_5	494032102	87108	5671.5	86615	80525	74629	92.9689	14.411	31364	12711	2.533	107615	10191	4.953
scNanoCT&ATAC-seq	H3K9me3	ATAC	GM12878-H3K9me3-3#5_6	152114709	30926	4918.7	30530	28128	25578	92.1323	4.27209	15998	7227	2.479	31683	2774	4.743
scNanoCT&ATAC-seq	H3K9me3	ATAC	GM12878-H3K9me3-3#5_7	483171266	92833	5204.7	91248	84013	76171	92.0711	13.8037	50777	19571	1.948	90202	7970	4.688
scNanoCT&ATAC-seq	H3K9me3	ATAC	GM12878-H3K9me3-3#5_8	108216695	25274	4281.7	24984	22977	21094	91.9669	3.01207	12773	5322	1.461	26783	2169	3.324
scNanoCT&ATAC-seq	H3K9me3	ATAC	GM12878-H3K9me3-3#5_9	379633350	69884	5432.3	69085	66357	61035	96.0512	11.3316	21965	8446	1.675	92114	6431	3.817
scNanoCT&ATAC-seq	H3K9me3	ATAC	GM12878-H3K9me3-3#6_1	397307277	75647	5252.1	75081	71398	65991	95.0946	11.756	28303	12876	2.196	94530	10965	6.173
scNanoCT&ATAC-seq	H3K9me3	ATAC	GM12878-H3K9me3-3#6_3	187669139	42878	4376.8	42510	39279	36704	92.3994	5.31454	16366	6375	2.632	51722	4984	4.66
scNanoCT&ATAC-seq	H3K9me3	ATAC	GM12878-H3K9me3-3#6_4	1066213728	203423	5241.4	202248	189842	175316	93.8659	31.1927	91325	26901	1.724	234932	15900	3.7
scNanoCT&ATAC-seq	H3K9me3	ATAC	GM12878-H3K9me3-3#6_5	28345309	7148	3965.5	7055	6384	5958	90.489	0.748312	3427	1555	2.619	7726	635	6.643
scNanoCT&ATAC-seq	H3K9me3	ATAC	GM12878-H3K9me3-3#6_6	551709538	106886	5161.7	106080	99281	89863	93.5907	16.0149	48225	18352	1.838	118926	10319	4.312
scNanoCT&ATAC-seq	H3K9me3	ATAC	GM12878-H3K9me3-3#6_7	415348722	75860	5475.2	75192	70117	63736	93.2506	12.105	30243	11987	2.193	88011	9098	5.154
scNanoCT&ATAC-seq	H3K9me3	ATAC	GM12878-H3K9me3-3#6_9	120745587	25375	4758.4	25084	23690	21751	94.4427	3.48169	10066	4341	1.349	30537	3288	4.082
scNanoCT&ATAC-seq	H3K9me3	ATAC	GM12878-H3K9me3-3#7_1	672551431	127004	5295.5	126044	114934	105496	91.1856	19.0204	64644	26380	2.012	131682	11852	5.067
scNanoCT&ATAC-seq	H3K9me3	ATAC	GM12878-H3K9me3-3#7_2	491007925	88212	5566.2	87499	82527	75575	94.3176	14.4092	38070	13601	1.83	102821	9635	5.789
scNanoCT&ATAC-seq	H3K9me3	ATAC	GM12878-H3K9me3-3#7_3	203851507	44430	4588.2	44062	41211	38459	93.5296	5.85221	19247	8586	3.502	52155	5111	5.465
scNanoCT&ATAC-seq	H3K9me3	ATAC	GM12878-H3K9me3-3#7_4	456674099	79857	5718.6	79382	74308	69286	93.6081	13.3822	29051	12467	2.494	99876	9836	5.423
scNanoCT&ATAC-seq	H3K9me3	ATAC	GM12878-H3K9me3-3#7_5	353638669	62354	5671.5	61930	57711	53348	93.1875	10.291	22765	9846	2.851	76963	8616	5.243
scNanoCT&ATAC-seq	H3K9me3	ATAC	GM12878-H3K9me3-3#7_6	517969603	94525	5479.7	93453	86815	79263	92.897	15.0214	28629	11594	1.61	118383	9702	4.411
scNanoCT&ATAC-seq	H3K9me3	ATAC	GM12878-H3K9me3-3#7_7	289199043	52219	5538.2	51455	48248	44147	93.7674	8.3773	23735	10691	1.936	58568	5921	6.004
scNanoCT&ATAC-seq	H3K9me3	ATAC	GM12878-H3K9me3-3#7_8	471215833	86267	5462.3	85363	81495	74996	95.4688	14.0406	29795	11668	2.568	110489	11495	5.855
scNanoCT&ATAC-seq	H3K9me3	ATAC	GM12878-H3K9me3-3#8_1	68575923	19889	3447.9	19722	18400	16796	93.2968	1.91118	11903	4563	2.098	19487	1733	3.496
scNanoCT&ATAC-seq	H3K9me3	ATAC	GM12878-H3K9me3-3#8_2	558323687	103610	5388.7	102834	96627	88673	93.9641	16.3599	36177	14876	1.672	127607	12587	4.882
scNanoCT&ATAC-seq	H3K9me3	ATAC	GM12878-H3K9me3-3#8_3	96810747	23270	4160.3	23059	21231	19960	92.0725	2.72436	11207	4749	1.44	26133	2729	4.763
scNanoCT&ATAC-seq	H3K9me3	ATAC	GM12878-H3K9me3-3#8_4	339857517	64519	5267.6	64100	59347	55151	92.585	9.80009	28899	11133	2.533	73650	7039	5.165
scNanoCT&ATAC-seq	H3K9me3	ATAC	GM12878-H3K9me3-3#8_5	519937242	94743	5487.9	94248	88840	82214	94.2619	15.3466	39173	17134	2.469	114348	11230	5.963
scNanoCT&ATAC-seq	H3K9me3	ATAC	GM12878-H3K9me3-3#8_7	13894771	4013	3462.4	3848	3610	3440	93.815	0.364535	2374	980	1.636	3901	470	6.554
scNanoCT&ATAC-seq	H3K9me3	ATAC	GM12878-H3K9me3-3#8_8	136239722	28069	4853.7	27850	26320	24386	94.5063	3.98423	10645	4501	1.708	35000	3329	4.568
scNanoCT&ATAC-seq	H3K9me3	ATAC	GM12878-H3K9me3-3#8_9	194251070	40790	4762.2	40407	36046	32932	89.2073	5.32316	17360	6844	1.886	43599	4343	4.543
scNanoCT&ATAC-seq	H3K9me3	ATAC	GM12878-H3K9me3-4#10_1	153661856	31994	4802.8	31556	29634	27992	93.9092	4.42549	13649	6211	2.217	38454	4921	5.667
scNanoCT&ATAC-seq	H3K9me3	ATAC	GM12878-H3K9me3-4#10_11	327336916	62066	5274	61467	57385	53491	93.359	9.46509	29645	13244	2.433	69599	7821	5.546
scNanoCT&ATAC-seq	H3K9me3	ATAC	GM12878-H3K9me3-4#10_2	156401202	32132	4867.5	31735	30028	28207	94.6211	4.51203	13486	5846	1.822	39201	4061	3.573
scNanoCT&ATAC-seq	H3K9me3	ATAC	GM12878-H3K9me3-4#10_3	146872268	33141	4431.7	32796	30871	29379	94.1304	4.22322	13078	5304	2.607	41361	4879	4.443
scNanoCT&ATAC-seq	H3K9me3	ATAC	GM12878-H3K9me3-4#10_4	489751992	89457	5474.7	88849	81373	77157	91.5857	14.0049	41637	15155	2.627	99926	8444	4.955
scNanoCT&ATAC-seq	H3K9me3	ATAC	GM12878-H3K9me3-4#10_5	378316527	66162	5718	65759	61483	58014	93.4975	11.0599	27554	11230	2.469	80691	8620	6.156
scNanoCT&ATAC-seq	H3K9me3	ATAC	GM12878-H3K9me3-4#10_6	231411869	42478	5447.8	42048	40208	37803	95.624	6.85348	16137	6677	2.72	54345	6741	5.451
scNanoCT&ATAC-seq	H3K9me3	ATAC	GM12878-H3K9me3-4#10_7	326982906	67523	4842.5	57417	54140	50829	94.2926	9.41753	22916	9096	2.199	71806	7201	6.664
scNanoCT&ATAC-seq	H3K9me3	ATAC	GM12878-H3K9me3-4#10_8	375258156	76870	4881.7	76315	69524	64925	91.1014	10.6303	37557	14565	2.492	82843	7503	4.983
scNanoCT&ATAC-seq	H3K9me3	ATAC	GM12878-H3K9me3-4#10_9	474848309	90618	5240.1	89718	81771	76387	91.1422	13.4763	39130	15218	2.475	101667	10014	5.149
scNanoCT&ATAC-seq	H3K9me3	ATAC	GM12878-H3K9me3-4#11_1	372156691	72193	5155	71635	68149	63989	95.1337	10.9883	35410	11938	2.027	83403	6705	4.773
scNanoCT&ATAC-seq	H3K9me3	ATAC	GM12878-H3K9me3-4#11_11	427096413	81882	5216	81256	73780	68607	90.7994	12.0956	32947	12019	1.891	94793	9113	5.462
scNanoCT&ATAC-seq	H3K9me3	ATAC	GM12878-H3K9me3-4#11_2	224508949	40043	5606.7	39614	36034	33724	90.9628	6.34939	20129	8150	4.046	42404	4273	6.161
scNanoCT&ATAC-seq	H3K9me3	ATAC	GM12878-H3K9me3-4#11_3	59254528	16256	3645.1	16049	14764	13892	91.9933	1.6234	9804	3374	1.603	15807	1294	4.36
scNanoCT&ATAC-seq	H3K9me3	ATAC	GM12878-H3K9me3-4#11_4	271570088	50491	5378.6	50195	47931	45303	95.4896	8.07173	19264	7123	2.535	64985	6860	5.941
scNanoCT&ATAC-seq	H3K9me3	ATAC	GM12878-H3K9me3-4#11_5	586882950	111302	5272.9	110673	99762	93010	90.1412	16.5469	70833	24582	2.444	102028	9156	5.092
scNanoCT&ATAC-seq	H3K9me3	ATAC	GM12878-H3K9me3-4#11_6	188863881	41085	4596.9	40655	37513	35256	92.2716	5.31892	20928	6698	1.248	44791	3328	4.468
scNanoCT&ATAC-seq	H3K9me3	ATAC	GM12878-H3K9me3-4#11_7	165394622	38405	4306.6	37797	34997	33116	92.592	4.66844	21624	8974	2.189	39780	4281	5.188
scNanoCT&ATAC-seq	H3K9me3	ATAC	GM12878-H3K9me3-4#11_9	306825367	57580	5328.7	57030	53810	50128	94.3538	8.99224	29615	12365	1.925	63714	7653	6.629
scNanoCT&ATAC-seq	H3K9me3	ATAC	GM12878-H3K9me3-4#12_1	262294733	50114	5234	49496	46418	43775	93.7813	7.63778	24826	9666	2.196	56295	5245	5.414
scNanoCT&ATAC-seq	H3K9me3	ATAC	GM12878-H3K9me3-4#12_10	247418166	52029	4755.4	51713	47891	44741	92.6092	7.0497	30370	10334	1.414	53368	3662	3.246
scNanoCT&ATAC-seq	H3K9me3	ATAC	GM12878-H3K9me3-4#12_11	308726759	57570	5362.6	57129	53162	49789	93.0561	8.96405	28274	11261	1.998	64128	7081	5.611
scNanoCT&ATAC-seq	H3K9me3	ATAC	GM12878-H3K9me3-4#12_2	370292780	69281	5344.8	68710	62458	58392	90.9009	10.4518	38852	14678	2.094	69288	7205	6.461
scNanoCT&ATAC-seq	H3K9me3	ATAC	GM12878-H3K9me3-4#12_3	213431651	49217	4336.5	48775	43801	41329	89.8022	5.87184	29471	11911	2.045	46966	5088	5.61
scNanoCT&ATAC-seq	H3K9me3	ATAC	GM12878-H3K9me3-4#12_4	52513593	10331	5083.1	10243	9624	9151	93.9568	1.50598	4742	1997	2.326	12221	1284	5.139
scNanoCT&ATAC-seq	H3K9me3	ATAC	GM12878-H3K9me3-4#12_5	322011332	56252	5724.4	55923	53002	50098	94.7767	9.56419	20051	7813	2.536	72984	7240	5.543
scNanoCT&ATAC-seq	H3K9me3	ATAC	GM12878-H3K9me3-4#12_6	314970817	59266	5314.5	58743	52780	49233	89.849	8.78991	40100	14617	2.456	50750	5393	5.661
scNanoCT&ATAC-seq	H3K9me3	ATAC	GM12878-H3K9me3-4#12_7	379782670	71587	5305.2	70819	65239	60836	92.1208	10.8645	33115	12731	2.368	78939	8770	6.226
scNanoCT&ATAC-seq	H3K9me3	ATAC	GM12878-H3K9me3-4#12_8	32650261	6324	5162.9	6247	5645	5340	90.3634	0.892588	3377	1492	3.152	6576	624	3.719
scNanoCT&ATAC-seq	H3K9me3	ATAC	GM12878-H3K9me3-4#12_9	267282701	50065	5338.7	49626	46178	43363	93.052	7.71305	21480	9318	2.629	58767	6495	6.241
scNanoCT&ATAC-seq	H3K9me3	ATAC	GM12878-H3K9me3-4#13_1	349678488	65940	5303	65499	61661	57927	94.1404	10.2392	22420	9500	1.849	85200	8064	5.316
scNanoCT&ATAC-seq	H3K9me3	ATAC	GM12878-H3K9me3-4#13_10	35484849	9355	3793.1	9275	8930	8321	96.2803	1.01979	4247	1861	1.98	11554	1190	4.103
scNanoCT&ATAC-seq	H3K9me3	ATAC	GM12878-H3K9me3-4#13_11	443535423	84708	5236.1	84124	77675	72078	92.3339	12.7651	39629	16241	2.354	94944	10442	5.495
scNanoCT&ATAC-seq	H3K9me3	ATAC	GM12878-H3K9me3-4#13_2	374722721	69564	5386.7	69053	64700	60466	93.6961	10.9507	27202	10834	2.488	85341	9971	5.9
scNanoCT&ATAC-seq	H3K9me3	ATAC	GM12878-H3K9me3-4#13_3	16075584	5531	2906.5	5382	4699	4617	87.3096	0.393233	3122	1085	2.076	5096	430	7.46
scNanoCT&ATAC-seq	H3K9me3	ATAC	GM12878-H3K9me3-4#13_4	410522469	77920	5268.5	77463	71430	67146	92.2118	11.7801	53053	17320	2.327	71213	5877	5.96
scNanoCT&ATAC-seq	H3K9me3	ATAC	GM12878-H3K9me3-4#13_6	52219567	10336	5052.2	10174	9366	8766	92.0582	1.4492	4937	2047	2.047	11352	1060	3.938
scNanoCT&ATAC-seq	H3K9me3	ATAC	GM12878-H3K9me3-4#13_7	472517543	83652	5648.6	82906	79298	74370	95.6481	14.1501	20825	9749	2.585	117885	13265	5.552
scNanoCT&ATAC-seq	H3K9me3	ATAC	GM12878-H3K9me3-4#13_8	307898707	55088	5589.2	54764	51542	48211	94.1166	9.03813	15193	6493	2.59	74695	7368	5.255
scNanoCT&ATAC-seq	H3K9me3	ATAC	GM12878-H3K9me3-4#13_9	453039498	87368	5185.4	86692	80310	74471	92.6383	13.0482	41605	17169	1.631	96540	10237	5.148
scNanoCT&ATAC-seq	H3K9me3	ATAC	GM12878-H3K9me3-4#14_1	232320915	43972	5283.4	43655	42135	39730	96.5182	6.97642	11721	5785	1.491	62281	5477	5.803
scNanoCT&ATAC-seq	H3K9me3	ATAC	GM12878-H3K9me3-4#14_11	320724859	64774	4951.4	64287	58044	53999	90.2889	8.97899	38590	14443	2.533	61518	5496	3.794
scNanoCT&ATAC-seq	H3K9me3	ATAC	GM12878-H3K9me3-4#14_2	374940130	66827	5610.6	66283	61499	57538	92.7825	10.8696	27448	10981	2.078	79360	9864	5.515
scNanoCT&ATAC-seq	H3K9me3	ATAC	GM12878-H3K9me3-4#14_3	284128610	66216	4290.9	65722	60058	56600	91.3819	7.97906	35937	13054	2.187	68815	6686	5.238
scNanoCT&ATAC-seq	H3K9me3	ATAC	GM12878-H3K9me3-4#14_4	212521479	38489	5521.6	38273	35495	33597	92.7416	6.14378	16893	7044	2.566	45527	5172	6.089
scNanoCT&ATAC-seq	H3K9me3	ATAC	GM12878-H3K9me3-4#14_5	451661649	84605	5338.5	84106	75067	70245	89.2528	12.606	47313	17789	1.865	82935	8014	5.468
scNanoCT&ATAC-seq	H3K9me3	ATAC	GM12878-H3K9me3-4#14_6	576699845	112218	5139.1	111503	102397	94981	91.8334	16.5414	55998	20517	2.308	119928	11269	4.668
scNanoCT&ATAC-seq	H3K9me3	ATAC	GM12878-H3K9me3-4#14_7	427008396	78544	5436.6	77835	73438	68512	94.3509	12.5662	36308	12967	2.714	90886	8447	5.472
scNanoCT&ATAC-seq	H3K9me3	ATAC	GM12878-H3K9me3-4#14_8	450389285	83808	5374.1	83329	77702	72350	93.2472	13.1491	33537	13364	1.793	101099	11415	5.584
scNanoCT&ATAC-seq	H3K9me3	ATAC	GM12878-H3K9me3-4#14_9	497765824	89175	5581.9	88468	84465	79425	95.4752	14.8582	23379	10171	2.741	124640	13524	5.201
scNanoCT&ATAC-seq	H3K9me3	ATAC	GM12878-H3K9me3-4#15_1	194491615	37593	5173.6	37101	33738	31771	90.9356	5.45804	17752	7599	3.024	40941	3919	6.153
scNanoCT&ATAC-seq	H3K9me3	ATAC	GM12878-H3K9me3-4#15_10	31329986	4916	6373.1	4759	4008	3853	84.2194	0.822009	1789	663	2.558	6170	573	5.526
scNanoCT&ATAC-seq	H3K9me3	ATAC	GM12878-H3K9me3-4#15_11	215019249	38998	5513.6	38646	35909	33665	92.9178	6.21635	11285	4643	2.07	51327	5480	5.53
scNanoCT&ATAC-seq	H3K9me3	ATAC	GM12878-H3K9me3-4#15_12	221869966	40820	5435.3	40477	37374	35160	92.3339	6.38794	18811	8773	2.159	46704	5412	6.233
scNanoCT&ATAC-seq	H3K9me3	ATAC	GM12878-H3K9me3-4#15_2	737633840	137658	5358.5	136497	125617	117164	92.0291	21.1705	75271	28734	2.512	141544	13957	5.498
scNanoCT&ATAC-seq	H3K9me3	ATAC	GM12878-H3K9me3-4#15_3	141987882	32474	4372.4	32129	30191	28613	93.9681	4.06966	15263	7164	1.848	37362	3823	6.17
scNanoCT&ATAC-seq	H3K9me3	ATAC	GM12878-H3K9me3-4#15_4	562978442	101890	5525.4	101276	93441	88351	92.2637	16.2	59107	20252	2.579	104029	9023	5.663
scNanoCT&ATAC-seq	H3K9me3	ATAC	GM12878-H3K9me3-4#15_5	372893227	67953	5487.5	67497	61555	57926	91.1966	10.6172	32400	11786	2.077	75305	7206	5.139
scNanoCT&ATAC-seq	H3K9me3	ATAC	GM12878-H3K9me3-4#15_6	587656057	107165	5483.7	106114	98407	92301	92.7371	16.9964	42616	17960	2.225	128718	12413	5.658
scNanoCT&ATAC-seq	H3K9me3	ATAC	GM12878-H3K9me3-4#15_7	559656404	111303	5028.2	109390	100455	93419	91.832	15.9201	69297	23873	2.201	103592	10347	4.773
scNanoCT&ATAC-seq	H3K9me3	ATAC	GM12878-H3K9me3-4#15_8	333736829	61877	5393.6	61433	56649	52685	92.2127	9.56859	29720	12655	2.857	67980	8225	6
scNanoCT&ATAC-seq	H3K9me3	ATAC	GM12878-H3K9me3-4#15_9	283943805	54417	5217.9	52086	47692	44471	91.564	8.03905	25191	10825	3.143	57005	6169	5.972
scNanoCT&ATAC-seq	H3K9me3	ATAC	GM12878-H3K9me3-4#16_1	239513254	47719	5019.2	47342	43917	41619	92.7654	6.88285	19101	7248	2.64	58352	5508	4.775
scNanoCT&ATAC-seq	H3K9me3	ATAC	GM12878-H3K9me3-4#16_10	493067315	90919	5423.1	90379	82331	77398	91.0953	14.0654	38744	13507	2.23	104739	10127	5.243
scNanoCT&ATAC-seq	H3K9me3	ATAC	GM12878-H3K9me3-4#16_11	271404273	50504	5373.9	50131	47172	44464	94.0975	7.94559	21527	9159	2.276	61181	6368	5.711
scNanoCT&ATAC-seq	H3K9me3	ATAC	GM12878-H3K9me3-4#16_2	402987089	75040	5370.3	74468	69629	66272	93.5019	11.7467	28395	10730	1.8	94429	10388	5.142
scNanoCT&ATAC-seq	H3K9me3	ATAC	GM12878-H3K9me3-4#16_3	110811901	26399	4197.6	26119	23238	22375	88.9697	3.00335	10631	3493	2.17	30141	979	3.481
scNanoCT&ATAC-seq	H3K9me3	ATAC	GM12878-H3K9me3-4#16_4	391598884	71406	5484.1	71005	67368	64119	94.8778	11.5956	29587	12180	2.814	89581	10159	6.44
scNanoCT&ATAC-seq	H3K9me3	ATAC	GM12878-H3K9me3-4#16_5	437793400	83087	5269.1	82609	75468	71127	91.3557	12.4763	48547	19203	2.513	83389	8568	5.015
scNanoCT&ATAC-seq	H3K9me3	ATAC	GM12878-H3K9me3-4#16_6	477172976	89034	5359.4	88215	81587	76981	92.4865	13.7886	40805	15656	2.153	102388	10781	5.34
scNanoCT&ATAC-seq	H3K9me3	ATAC	GM12878-H3K9me3-4#16_7	268240078	48922	5483	48347	45372	42951	93.8466	7.82265	19962	7728	2.503	59740	6438	6.255
scNanoCT&ATAC-seq	H3K9me3	ATAC	GM12878-H3K9me3-4#16_8	321070776	57276	5605.7	56951	53560	50680	94.0458	9.44073	23901	9558	3.415	70335	7960	5.842
scNanoCT&ATAC-seq	H3K9me3	ATAC	GM12878-H3K9me3-4#16_9	273741361	49959	5479.3	49545	47393	44912	95.6565	8.14129	11869	4842	2.321	71529	6432	5.032
scNanoCT&ATAC-seq	H3K9me3	ATAC	GM12878-H3K9me3-4#9_1	190741888	37728	5055.7	37349	34854	32877	93.3198	5.51607	16744	7228	1.864	44195	4398	6.268
scNanoCT&ATAC-seq	H3K9me3	ATAC	GM12878-H3K9me3-4#9_2	722231214	142983	5051.2	141874	129623	120681	91.3649	20.5619	74223	24105	1.844	149403	11621	4.387
scNanoCT&ATAC-seq	H3K9me3	ATAC	GM12878-H3K9me3-4#9_3	243194790	59215	4107	58749	52033	49060	88.5683	6.58664	37475	13715	2.407	52814	4658	4.71
scNanoCT&ATAC-seq	H3K9me3	ATAC	GM12878-H3K9me3-4#9_4	197073428	35277	5586.5	35047	32543	31026	92.8553	5.69793	9500	3620	3.346	47699	4002	5.747
scNanoCT&ATAC-seq	H3K9me3	ATAC	GM12878-H3K9me3-4#9_5	162865925	31686	5140	31463	28731	27183	91.3168	4.6087	11393	4504	1.817	39202	3579	3.689
scNanoCT&ATAC-seq	H3K9me3	ATAC	GM12878-H3K9me3-4#9_6	190958514	34376	5555	34085	32353	30364	94.9186	5.63625	13253	6196	2.684	43035	4721	6.221
scNanoCT&ATAC-seq	H3K9me3	ATAC	GM12878-H3K9me3-4#9_7	356325941	68367	5212	67697	63797	60002	94.239	10.4499	22500	10354	2.195	89136	9712	5.768
scNanoCT&ATAC-seq	H3K9me3	ATAC	GM12878-H3K9me3-4#9_8	351438322	66139	5313.6	65676	59838	55870	91.1109	10.0113	32850	13340	2.449	70970	8155	5.303
scNanoCT&ATAC-seq	H3K9me3	ATAC	GM12878-H3K9me3-4#9_9	369159281	69142	5339.1	68507	63399	59338	92.5438	10.626	33262	11918	2.063	76540	7761	5.402
scNanoCT&ATAC-seq	H3K27ac	ATAC	K562-H3K27ac-1#33_1	254675441	52647	4837.4	51748	49355	47245	95.3757	7.47724	21546	14285	3.505	66766	7953	2.787
scNanoCT&ATAC-seq	H3K27ac	ATAC	K562-H3K27ac-1#33_10	169716835	34096	4977.6	33227	31713	30393	95.4435	5.00401	10342	6400	3.307	46838	6176	2.481
scNanoCT&ATAC-seq	H3K27ac	ATAC	K562-H3K27ac-1#33_11	210723542	42350	4975.8	42036	40381	38461	96.0629	6.25634	14569	9152	2.646	57487	6315	2.228
scNanoCT&ATAC-seq	H3K27ac	ATAC	K562-H3K27ac-1#33_12	284895255	57255	4975.9	56787	54320	51826	95.6557	8.43968	25322	16585	3.424	71942	11515	3.164
scNanoCT&ATAC-seq	H3K27ac	ATAC	K562-H3K27ac-1#33_2	253077206	50888	4973.2	50489	48081	45910	95.2306	7.42625	18519	10513	1.947	67371	6649	1.867
scNanoCT&ATAC-seq	H3K27ac	ATAC	K562-H3K27ac-1#33_3	158511601	39802	3982.5	39521	37919	36569	95.9465	4.61835	20100	13911	3.654	48067	7483	3.26
scNanoCT&ATAC-seq	H3K27ac	ATAC	K562-H3K27ac-1#33_4	169046823	39495	4280.2	39310	38304	36841	97.4409	5.04571	19088	9557	2.285	50275	4028	1.883
scNanoCT&ATAC-seq	H3K27ac	ATAC	K562-H3K27ac-1#33_5	219203589	43490	5040.3	43249	41182	39396	95.2207	6.45944	19723	12089	3.084	54459	8020	2.718
scNanoCT&ATAC-seq	H3K27ac	ATAC	K562-H3K27ac-1#33_6	311821788	65128	4787.8	62887	59730	56800	94.9799	9.09728	23267	13743	2.772	83274	9089	2.066
scNanoCT&ATAC-seq	H3K27ac	ATAC	K562-H3K27ac-1#33_7	287835029	60738	4739	58546	56274	53555	96.1193	8.5041	23333	14995	3.013	76645	9753	2.462
scNanoCT&ATAC-seq	H3K27ac	ATAC	K562-H3K27ac-1#33_8	219492307	45717	4801.1	44173	42503	40435	96.2194	6.53072	21365	14599	3.634	54466	9281	2.995
scNanoCT&ATAC-seq	H3K27ac	ATAC	K562-H3K27ac-1#33_9	128977186	27371	4712.2	26873	25856	24525	96.2155	3.80947	20554	14525	4.248	25137	5819	4.232
scNanoCT&ATAC-seq	H3K27ac	ATAC	K562-H3K27ac-1#34_1	109451615	22355	4896.1	22122	21500	20555	97.1883	3.26472	10727	6927	5.284	27746	4188	2.954
scNanoCT&ATAC-seq	H3K27ac	ATAC	K562-H3K27ac-1#34_10	145119286	29072	4991.7	28791	27615	26310	95.9154	4.30884	10500	6646	3.052	39009	5000	2.52
scNanoCT&ATAC-seq	H3K27ac	ATAC	K562-H3K27ac-1#34_11	225352927	46636	4832.2	46226	43966	41856	95.111	6.58317	18539	11048	2.347	59566	7074	2.14
scNanoCT&ATAC-seq	H3K27ac	ATAC	K562-H3K27ac-1#34_12	289376184	57881	4999.5	57181	54831	52545	95.8902	8.57743	19486	11792	3.286	78594	9353	2.486
scNanoCT&ATAC-seq	H3K27ac	ATAC	K562-H3K27ac-1#34_2	402873926	79156	5089.6	78283	74618	71268	95.3183	11.8525	27671	17522	2.882	105345	12983	2.302
scNanoCT&ATAC-seq	H3K27ac	ATAC	K562-H3K27ac-1#34_3	129349841	31392	4120.5	31110	29652	28580	95.3134	3.73719	13671	8511	2.48	39315	5014	2.305
scNanoCT&ATAC-seq	H3K27ac	ATAC	K562-H3K27ac-1#34_4	162915388	31928	5102.6	31680	30193	29072	95.3062	4.80078	11732	6874	3.05	41845	4563	1.996
scNanoCT&ATAC-seq	H3K27ac	ATAC	K562-H3K27ac-1#34_5	259268934	51250	5058.9	50938	48664	46516	95.5357	7.65769	21408	14212	3.404	65724	9756	2.725
scNanoCT&ATAC-seq	H3K27ac	ATAC	K562-H3K27ac-1#34_6	310028288	69091	4487.2	63993	60934	58244	95.2198	9.04294	24722	16318	3.008	84384	10509	2.338
scNanoCT&ATAC-seq	H3K27ac	ATAC	K562-H3K27ac-1#34_7	450889231	95715	4710.7	94018	90403	86065	96.155	13.3224	42694	29779	3.411	117819	18395	3.036
scNanoCT&ATAC-seq	H3K27ac	ATAC	K562-H3K27ac-1#34_8	422224600	83681	5045.6	82998	78686	75181	94.8047	12.373	28061	17979	2.694	112328	13856	2.425
scNanoCT&ATAC-seq	H3K27ac	ATAC	K562-H3K27ac-1#34_9	269773695	58124	4641.3	56657	54051	51604	95.4004	7.91425	26563	18502	4.263	69776	12339	3.642
scNanoCT&ATAC-seq	H3K27ac	ATAC	K562-H3K27ac-1#35_1	328177364	66656	4923.4	65487	62539	59746	95.4983	9.67277	24287	15827	3.444	87200	11466	2.759
scNanoCT&ATAC-seq	H3K27ac	ATAC	K562-H3K27ac-1#35_10	227202179	46154	4922.7	45766	43391	41309	94.8106	6.63732	18074	11018	3.209	59328	7799	2.336
scNanoCT&ATAC-seq	H3K27ac	ATAC	K562-H3K27ac-1#35_11	121319564	25616	4736.1	25142	24155	22807	96.0743	3.57445	13920	8891	3.009	28746	4333	2.866
scNanoCT&ATAC-seq	H3K27ac	ATAC	K562-H3K27ac-1#35_12	624955828	126705	4932.4	125894	119941	114015	95.2714	18.4242	48038	33106	3.524	165810	24029	2.756
scNanoCT&ATAC-seq	H3K27ac	ATAC	K562-H3K27ac-1#35_2	261286936	51295	5093.8	50812	49083	46646	96.5973	7.7915	19006	9972	3.489	68120	5840	2.506
scNanoCT&ATAC-seq	H3K27ac	ATAC	K562-H3K27ac-1#35_3	269781333	66976	4028	66453	63603	60925	95.7113	7.8553	28813	17433	2.386	85092	9042	2.16
scNanoCT&ATAC-seq	H3K27ac	ATAC	K562-H3K27ac-1#35_4	186499034	36151	5158.9	35885	34206	32741	95.3212	5.49412	11852	6785	2.932	49078	5399	2.367
scNanoCT&ATAC-seq	H3K27ac	ATAC	K562-H3K27ac-1#35_5	307800232	59803	5146.9	59478	56766	54181	95.4403	9.09776	22453	14559	3.059	79174	10321	2.53
scNanoCT&ATAC-seq	H3K27ac	ATAC	K562-H3K27ac-1#35_6	228030425	77098	2957.7	58951	56649	53306	96.0951	6.41388	32621	10993	3.311	68306	3986	3.341
scNanoCT&ATAC-seq	H3K27ac	ATAC	K562-H3K27ac-1#35_7	102183673	37228	2744.8	20226	18813	17942	93.0139	2.6845	10842	7244	3.325	22283	2924	3.224
scNanoCT&ATAC-seq	H3K27ac	ATAC	K562-H3K27ac-1#35_8	389508131	79867	4877	78732	75492	71604	95.8848	11.5652	31075	20010	2.901	102916	13193	2.354
scNanoCT&ATAC-seq	H3K27ac	ATAC	K562-H3K27ac-1#35_9	86206108	17374	4961.8	16868	16131	15364	95.6308	2.51579	6084	4433	5.598	22524	3745	4.055
scNanoCT&ATAC-seq	H3K27ac	ATAC	K562-H3K27ac-1#36_1	240186546	51030	4706.8	49573	47194	45031	95.201	7.00952	18708	11439	2.494	65246	7299	2.035
scNanoCT&ATAC-seq	H3K27ac	ATAC	K562-H3K27ac-1#36_10	361712591	71330	5071	70750	67705	64522	95.6961	10.7345	25698	16405	2.792	95475	11404	2.443
scNanoCT&ATAC-seq	H3K27ac	ATAC	K562-H3K27ac-1#36_11	351224788	71993	4878.6	71395	68445	65152	95.8681	10.4012	26705	17572	3.104	95409	11760	2.458
scNanoCT&ATAC-seq	H3K27ac	ATAC	K562-H3K27ac-1#36_12	337546608	68304	4941.8	67905	65154	62203	95.9488	10.023	28232	17968	2.67	88379	9826	2.252
scNanoCT&ATAC-seq	H3K27ac	ATAC	K562-H3K27ac-1#36_2	247826630	49922	4964.3	49342	47005	44621	95.2637	7.24536	20625	12369	2.553	62594	7794	2.21
scNanoCT&ATAC-seq	H3K27ac	ATAC	K562-H3K27ac-1#36_3	134149675	34882	3845.8	34531	33002	31758	95.5721	3.8819	17426	11656	3.298	42259	6414	2.819
scNanoCT&ATAC-seq	H3K27ac	ATAC	K562-H3K27ac-1#36_4	135217375	26841	5037.7	26641	25660	24571	96.3177	4.02278	12157	7288	3.461	33594	4469	2.566
scNanoCT&ATAC-seq	H3K27ac	ATAC	K562-H3K27ac-1#36_5	208095235	40849	5094.3	40541	38701	36999	95.4614	6.15865	12588	7473	3.12	56712	6204	2.121
scNanoCT&ATAC-seq	H3K27ac	ATAC	K562-H3K27ac-1#36_6	117112361	25367	4616.7	23922	23182	21927	96.9066	3.45986	13423	9284	4.454	26986	4422	3.307
scNanoCT&ATAC-seq	H3K27ac	ATAC	K562-H3K27ac-1#36_8	340786560	70408	4840.2	68935	66111	62956	95.9034	10.0846	27532	18116	2.904	90329	11442	2.385
scNanoCT&ATAC-seq	H3K27ac	ATAC	K562-H3K27ac-1#36_9	244031338	55505	4396.6	49138	47219	44984	96.0947	7.14931	17352	11442	2.777	66916	8606	2.658
scNanoCT&ATAC-seq	H3K27ac	ATAC	K562-H3K27ac-1#37_1	683254660	139062	4913.3	138084	132637	126794	96.0553	20.281	56720	34459	2.802	179627	22045	2.257
scNanoCT&ATAC-seq	H3K27ac	ATAC	K562-H3K27ac-1#37_10	245399342	48719	5037	48454	45923	43969	94.7765	7.17042	17150	9889	2.352	65505	7653	1.952
scNanoCT&ATAC-seq	H3K27ac	ATAC	K562-H3K27ac-1#37_11	311223431	63621	4891.8	63173	60546	57668	95.8416	9.20292	26949	18102	3.182	81030	11186	2.811
scNanoCT&ATAC-seq	H3K27ac	ATAC	K562-H3K27ac-1#37_12	282301514	57641	4897.6	57198	54766	52144	95.7481	8.35109	26048	17489	3.26	71905	11315	2.704
scNanoCT&ATAC-seq	H3K27ac	ATAC	K562-H3K27ac-1#37_2	133869317	25593	5230.7	25348	24173	23053	95.3645	3.91892	8997	5954	4.993	34087	5603	3.452
scNanoCT&ATAC-seq	H3K27ac	ATAC	K562-H3K27ac-1#37_3	44263958	10805	4096.6	10643	10244	9849	96.2511	1.27305	5825	4426	4.54	12031	2140	3.767
scNanoCT&ATAC-seq	H3K27ac	ATAC	K562-H3K27ac-1#37_4	162244888	31676	5122	31451	30002	28713	95.3928	4.77425	14107	8470	3.423	39215	5201	2.215
scNanoCT&ATAC-seq	H3K27ac	ATAC	K562-H3K27ac-1#37_5	250578186	62482	4010.4	62222	59436	56757	95.5225	7.34646	27667	7900	3.329	79439	2937	2.952
scNanoCT&ATAC-seq	H3K27ac	ATAC	K562-H3K27ac-1#37_6	258934424	53766	4816	53076	50578	47847	95.2935	7.57852	24073	13864	2.901	65463	8266	2.3
scNanoCT&ATAC-seq	H3K27ac	ATAC	K562-H3K27ac-1#37_7	308135238	63593	4845.4	62758	60430	57281	96.2905	9.11354	27492	17497	3.182	79035	10636	2.602
scNanoCT&ATAC-seq	H3K27ac	ATAC	K562-H3K27ac-1#37_8	307579048	64362	4778.9	62921	59680	56748	94.8491	8.98649	21940	12489	2.186	84450	8624	1.956
scNanoCT&ATAC-seq	H3K27ac	ATAC	K562-H3K27ac-1#37_9	397608497	80502	4939.1	78775	75171	71493	95.4249	11.6976	26638	16844	2.773	107125	12394	2.293
scNanoCT&ATAC-seq	H3K27ac	ATAC	K562-H3K27ac-1#38_1	287409220	57434	5004.2	56801	53977	51938	95.0283	8.43754	19163	12101	2.46	77253	9603	2.375
scNanoCT&ATAC-seq	H3K27ac	ATAC	K562-H3K27ac-1#38_10	110556732	23927	4620.6	21340	20438	19660	95.7732	3.23882	7017	4702	5.172	29950	4410	2.987
scNanoCT&ATAC-seq	H3K27ac	ATAC	K562-H3K27ac-1#38_11	223623040	61475	3637.6	58776	57128	54782	97.1961	6.60434	22326	7091	2.757	81052	3400	3.293
scNanoCT&ATAC-seq	H3K27ac	ATAC	K562-H3K27ac-1#38_12	76319550	16288	4685.6	15454	14897	14231	96.3958	2.25757	7461	5224	3.566	19183	3038	4.26
scNanoCT&ATAC-seq	H3K27ac	ATAC	K562-H3K27ac-1#38_2	596040205	121892	4889.9	120833	115802	110694	95.8364	17.6461	58366	36247	3.385	148774	19871	2.811
scNanoCT&ATAC-seq	H3K27ac	ATAC	K562-H3K27ac-1#38_3	361237944	96112	3758.5	95448	91622	88023	95.9915	10.5653	53260	19855	3.11	110876	7950	2.715
scNanoCT&ATAC-seq	H3K27ac	ATAC	K562-H3K27ac-1#38_4	209156186	41532	5036	41225	39599	38085	96.0558	6.21918	17447	10878	3.174	53505	6831	2.438
scNanoCT&ATAC-seq	H3K27ac	ATAC	K562-H3K27ac-1#38_5	67012343	13377	5009.5	12995	12459	11977	95.8753	1.97498	5865	4103	3.521	16508	2328	2.92
scNanoCT&ATAC-seq	H3K27ac	ATAC	K562-H3K27ac-1#38_6	249511140	71944	3468.1	49292	46687	44617	94.7152	7.08765	19485	12995	3.219	63540	7603	2.802
scNanoCT&ATAC-seq	H3K27ac	ATAC	K562-H3K27ac-1#38_7	75513428	22439	3365.3	15349	14699	14063	95.7652	2.11861	7885	5232	3.143	17907	2857	3.408
scNanoCT&ATAC-seq	H3K27ac	ATAC	K562-H3K27ac-1#38_8	137773976	71981	1914	24619	22835	21898	92.7536	3.42325	9746	6557	4.961	31140	4506	3.026
scNanoCT&ATAC-seq	H3K27ac	ATAC	K562-H3K27ac-1#38_9	182478445	53780	3393.1	36671	34874	33258	95.0997	5.13947	18796	11651	3.874	43146	6528	2.957
scNanoCT&ATAC-seq	H3K27ac	ATAC	K562-H3K27ac-1#39_1	163359033	34191	4777.8	33772	32195	30712	95.3305	4.7672	15627	9242	2.122	41637	5270	2.016
scNanoCT&ATAC-seq	H3K27ac	ATAC	K562-H3K27ac-1#39_10	183333233	42037	4361.2	41685	38931	37312	93.3933	5.25295	16480	10648	4.269	53709	5594	3.146
scNanoCT&ATAC-seq	H3K27ac	ATAC	K562-H3K27ac-1#39_11	337894357	68715	4917.3	67976	64797	61762	95.3233	9.94796	21275	12894	3.079	94051	9479	2.272
scNanoCT&ATAC-seq	H3K27ac	ATAC	K562-H3K27ac-1#39_12	295313325	60306	4896.9	59823	56655	54005	94.7044	8.60385	21429	12103	2.298	79701	7917	2.1
scNanoCT&ATAC-seq	H3K27ac	ATAC	K562-H3K27ac-1#39_2	46607315	9417	4949.3	8879	8552	8195	96.3172	1.34578	4090	3216	6.254	11221	2435	5.446
scNanoCT&ATAC-seq	H3K27ac	ATAC	K562-H3K27ac-1#39_3	130481459	31924	4087.3	31583	30026	28892	95.0701	3.74067	13244	8056	2.928	40338	4829	2.051
scNanoCT&ATAC-seq	H3K27ac	ATAC	K562-H3K27ac-1#39_4	256797866	49790	5157.6	49432	47323	45484	95.7335	7.62523	18523	11774	3.065	66210	8528	2.59
scNanoCT&ATAC-seq	H3K27ac	ATAC	K562-H3K27ac-1#39_5	392979966	74923	5245.1	74443	71213	68101	95.6611	11.688	25933	14771	3.171	101347	11500	2.552
scNanoCT&ATAC-seq	H3K27ac	ATAC	K562-H3K27ac-1#39_6	281054472	106623	2636	69265	66398	63373	95.8608	7.71362	30503	14473	2.795	88853	6569	2.529
scNanoCT&ATAC-seq	H3K27ac	ATAC	K562-H3K27ac-1#39_7	212041914	56060	3782.4	45647	43626	41437	95.5725	6.08862	24279	16491	3.294	52807	8144	2.894
scNanoCT&ATAC-seq	H3K27ac	ATAC	K562-H3K27ac-1#39_8	265407995	61371	4324.6	52352	49918	47603	95.3507	7.70466	21315	14495	3.621	68280	9518	2.95
scNanoCT&ATAC-seq	H3K27ac	ATAC	K562-H3K27ac-1#39_9	157919598	37851	4172.1	32034	30543	29011	95.3456	4.53054	17237	10856	3.367	36824	5580	2.452
scNanoCT&ATAC-seq	H3K27ac	ATAC	K562-H3K27ac-1#40_1	116613538	25251	4618.2	24727	23923	22805	96.7485	3.45843	14743	10460	4.572	27967	5653	3.61
scNanoCT&ATAC-seq	H3K27ac	ATAC	K562-H3K27ac-1#40_10	193861662	39425	4917.2	39185	37862	35965	96.6237	5.81413	29480	18413	3.78	37898	7996	3.228
scNanoCT&ATAC-seq	H3K27ac	ATAC	K562-H3K27ac-1#40_11	293013829	60044	4880	59490	56764	53983	95.4177	8.60571	21826	13421	2.731	79308	9667	2.228
scNanoCT&ATAC-seq	H3K27ac	ATAC	K562-H3K27ac-1#40_12	247282287	49668	4978.7	49225	46653	44541	94.775	7.22735	17635	10045	2.418	66223	6598	2.341
scNanoCT&ATAC-seq	H3K27ac	ATAC	K562-H3K27ac-1#40_2	327733323	64503	5080.9	63947	61158	58443	95.6386	9.68128	21415	13997	2.897	87793	10310	2.443
scNanoCT&ATAC-seq	H3K27ac	ATAC	K562-H3K27ac-1#40_3	159242121	39609	4020.4	39261	37432	36009	95.3414	4.59226	16426	9189	2.423	50564	5506	1.894
scNanoCT&ATAC-seq	H3K27ac	ATAC	K562-H3K27ac-1#40_4	221522105	43137	5135.3	42855	40988	39374	95.6434	6.54697	17065	11075	3.407	56687	6952	2.42
scNanoCT&ATAC-seq	H3K27ac	ATAC	K562-H3K27ac-1#40_5	57760723	11462	5039.3	11363	10841	10397	95.4061	1.69615	6164	4020	4.224	13404	1909	3.132
scNanoCT&ATAC-seq	H3K27ac	ATAC	K562-H3K27ac-1#40_6	212464873	44937	4728.1	41242	39043	37274	94.6681	6.13722	13704	8499	3.034	56091	6599	2.441
scNanoCT&ATAC-seq	H3K27ac	ATAC	K562-H3K27ac-1#40_7	106099439	22582	4698.4	22009	21085	20063	95.8017	3.09114	11490	7247	3.469	25775	1759	2.346
scNanoCT&ATAC-seq	H3K27ac	ATAC	K562-H3K27ac-1#40_8	364041408	74251	4902.8	72113	69163	65836	95.9092	10.7654	28166	18017	2.867	95099	11619	2.463
scNanoCT&ATAC-seq	H3K27ac	ATAC	K562-H3K27ac-1#40_9	347747816	70635	4923.2	68993	65849	62731	95.443	10.2195	27619	17544	3.141	89649	11621	2.782
scNanoCT&ATAC-seq	H3K27ac	ATAC	K562-H3K27ac-2#41_1	66806912	19944	3349.7	19819	19078	18636	96.2612	1.90773	9699	6553	2.912	25542	3249	2.798
scNanoCT&ATAC-seq	H3K27ac	ATAC	K562-H3K27ac-2#41_10	390552454	77485	5040.4	77050	73261	70025	95.0824	11.5098	27778	17775	2.806	103500	13239	2.211
scNanoCT&ATAC-seq	H3K27ac	ATAC	K562-H3K27ac-2#41_11	279114980	57876	4822.6	57551	55027	52292	95.6143	8.24165	25655	17126	3.6	72502	10632	3.068
scNanoCT&ATAC-seq	H3K27ac	ATAC	K562-H3K27ac-2#41_12	365605274	74790	4888.4	74396	71344	67938	95.8976	10.8594	28071	18373	3.09	99537	12219	2.513
scNanoCT&ATAC-seq	H3K27ac	ATAC	K562-H3K27ac-2#41_2	409607922	81924	4999.9	81346	77071	73557	94.7447	11.9746	27016	17258	3.026	110627	12222	2.405
scNanoCT&ATAC-seq	H3K27ac	ATAC	K562-H3K27ac-2#41_3	165676020	47946	3455.5	47632	45337	43716	95.1818	4.74765	25551	13763	2.56	56245	6679	2.343
scNanoCT&ATAC-seq	H3K27ac	ATAC	K562-H3K27ac-2#41_4	125387352	26815	4676	26648	25330	24409	95.054	3.66724	11255	7915	4.472	34421	4973	3.523
scNanoCT&ATAC-seq	H3K27ac	ATAC	K562-H3K27ac-2#41_5	138762818	26021	5332.7	25893	24871	23957	96.053	4.13284	8152	5525	4.852	36729	5073	3.535
scNanoCT&ATAC-seq	H3K27ac	ATAC	K562-H3K27ac-2#41_6	259974229	53363	4871.8	53024	50687	48221	95.5926	7.64412	18957	11758	2.584	71565	8344	2.486
scNanoCT&ATAC-seq	H3K27ac	ATAC	K562-H3K27ac-2#41_7	392463536	81920	4790.8	81231	77579	73994	95.5042	11.5293	32795	20661	3.011	106447	12838	2.312
scNanoCT&ATAC-seq	H3K27ac	ATAC	K562-H3K27ac-2#41_8	263488674	52779	4992.3	52487	49860	47501	94.995	7.74581	19364	11762	2.962	69874	8106	2.438
scNanoCT&ATAC-seq	H3K27ac	ATAC	K562-H3K27ac-2#41_9	394422820	80324	4910.4	79766	76521	72922	95.9319	11.6875	27477	18476	3.018	109076	14221	2.443
scNanoCT&ATAC-seq	H3K27ac	ATAC	K562-H3K27ac-2#42_1	181704256	39420	4609.4	39027	37369	35961	95.7517	5.33694	16223	9507	2.373	50945	6345	2.021
scNanoCT&ATAC-seq	H3K27ac	ATAC	K562-H3K27ac-2#42_10	209112469	42466	4924.2	42160	40195	38455	95.3392	6.15021	15117	8429	2.254	57026	6315	1.857
scNanoCT&ATAC-seq	H3K27ac	ATAC	K562-H3K27ac-2#42_11	196600256	41164	4776	40890	39342	37543	96.2142	5.82079	19190	12512	3.641	51161	7873	2.764
scNanoCT&ATAC-seq	H3K27ac	ATAC	K562-H3K27ac-2#42_12	262146851	52857	4959.5	52553	49941	47831	95.0298	7.6946	17763	12503	3.592	72062	11502	2.493
scNanoCT&ATAC-seq	H3K27ac	ATAC	K562-H3K27ac-2#42_2	229384766	46565	4926.1	46101	43953	42107	95.3407	6.73071	16813	9950	2.87	61829	7447	2.056
scNanoCT&ATAC-seq	H3K27ac	ATAC	K562-H3K27ac-2#42_3	144944850	38300	3784.5	38009	36338	35104	95.6037	4.19046	15327	9534	2.398	50356	6083	2.118
scNanoCT&ATAC-seq	H3K27ac	ATAC	K562-H3K27ac-2#42_4	212043887	42940	4938.1	42684	40699	39184	95.3495	6.24921	15620	9813	2.846	57646	6831	2.237
scNanoCT&ATAC-seq	H3K27ac	ATAC	K562-H3K27ac-2#42_5	110942354	21831	5081.9	21639	20812	19922	96.1782	3.28647	13648	8803	3.617	23672	4132	2.851
scNanoCT&ATAC-seq	H3K27ac	ATAC	K562-H3K27ac-2#42_6	108295329	33633	3219.9	28185	27042	25878	95.9447	3.05655	16047	10751	3.173	32784	5072	3.064
scNanoCT&ATAC-seq	H3K27ac	ATAC	K562-H3K27ac-2#42_7	80151386	20850	3844.2	15956	15242	14679	95.5252	2.26737	6696	4737	4.479	20575	2862	3.817
scNanoCT&ATAC-seq	H3K27ac	ATAC	K562-H3K27ac-2#42_8	385582664	84034	4588.4	77267	74085	70984	95.8818	11.3656	26384	16898	2.842	106946	11681	2.357
scNanoCT&ATAC-seq	H3K27ac	ATAC	K562-H3K27ac-2#42_9	230685417	56538	4080.2	48107	46176	44110	95.986	6.6938	20497	13440	4.379	61974	8299	3.204
scNanoCT&ATAC-seq	H3K27ac	ATAC	K562-H3K27ac-2#43_1	273938295	56322	4863.8	55927	53487	51363	95.6372	8.09005	20715	11355	2.347	75333	7736	1.941
scNanoCT&ATAC-seq	H3K27ac	ATAC	K562-H3K27ac-2#43_10	287026171	72206	3975.1	71884	68565	65617	95.3828	8.36622	30802	11912	3.342	93513	4646	3.436
scNanoCT&ATAC-seq	H3K27ac	ATAC	K562-H3K27ac-2#43_11	235188333	49726	4729.7	49280	47306	45199	95.9943	6.92466	17628	12086	3.783	67316	8729	2.776
scNanoCT&ATAC-seq	H3K27ac	ATAC	K562-H3K27ac-2#43_12	204372887	42567	4801.2	42339	40418	38510	95.4628	6.02626	16703	9910	2.531	55893	6904	1.979
scNanoCT&ATAC-seq	H3K27ac	ATAC	K562-H3K27ac-2#43_2	277036306	56165	4932.5	55682	53274	50805	95.6754	8.1705	21886	14734	3.686	74135	8844	3.004
scNanoCT&ATAC-seq	H3K27ac	ATAC	K562-H3K27ac-2#43_3	35121497	9122	3850.2	8987	8545	8242	95.0818	0.985919	5688	3542	3.516	9572	544	1.675
scNanoCT&ATAC-seq	H3K27ac	ATAC	K562-H3K27ac-2#43_4	73973012	20436	3619.7	20324	19529	19068	96.0884	2.1436	9160	6011	3.22	26832	3314	2.325
scNanoCT&ATAC-seq	H3K27ac	ATAC	K562-H3K27ac-2#43_5	225996060	43990	5137.4	43563	41531	39790	95.3355	6.65222	17735	10454	3.022	56709	6594	2.3
scNanoCT&ATAC-seq	H3K27ac	ATAC	K562-H3K27ac-2#43_6	653745540	155027	4217	136102	130380	124261	95.7958	19.1223	54897	35180	3.15	178884	22412	2.533
scNanoCT&ATAC-seq	H3K27ac	ATAC	K562-H3K27ac-2#43_7	209237095	48291	4332.8	45633	43647	41680	95.6479	6.10801	24737	17250	3.345	53057	9298	2.947
scNanoCT&ATAC-seq	H3K27ac	ATAC	K562-H3K27ac-2#43_8	232380415	49227	4720.6	46920	44563	42617	94.9766	6.78371	17730	10437	2.707	62268	6921	1.908
scNanoCT&ATAC-seq	H3K27ac	ATAC	K562-H3K27ac-2#43_9	131852985	33562	3928.6	28147	26675	25403	94.7703	3.76076	16994	10810	3.202	30579	1609	2.319
scNanoCT&ATAC-seq	H3K27ac	ATAC	K562-H3K27ac-2#44_1	309651109	63122	4905.6	62695	60236	57611	96.0778	9.18786	23752	15264	2.803	84003	10674	2.362
scNanoCT&ATAC-seq	H3K27ac	ATAC	K562-H3K27ac-2#44_10	279324294	54839	5093.5	54489	51792	49403	95.0504	8.21883	18092	11089	2.666	74471	8691	2.127
scNanoCT&ATAC-seq	H3K27ac	ATAC	K562-H3K27ac-2#44_11	278610144	78682	3541	78170	76338	72867	97.6564	8.24539	26189	10077	2.341	111755	5569	2.28
scNanoCT&ATAC-seq	H3K27ac	ATAC	K562-H3K27ac-2#44_12	76768066	15526	4944.5	15366	14825	14144	96.4792	2.27117	6699	4999	5.804	19837	3633	3.821
scNanoCT&ATAC-seq	H3K27ac	ATAC	K562-H3K27ac-2#44_2	211799905	44454	4764.5	44054	42242	40161	95.8869	6.24606	24756	16214	3.767	50077	8736	2.903
scNanoCT&ATAC-seq	H3K27ac	ATAC	K562-H3K27ac-2#44_3	268304466	69396	3866.3	68897	66189	63630	96.0695	7.82451	31014	19302	2.736	88172	10259	1.989
scNanoCT&ATAC-seq	H3K27ac	ATAC	K562-H3K27ac-2#44_4	114430004	24176	4733.2	24008	22747	21815	94.7476	3.33908	12759	8376	3.921	27986	4552	3.555
scNanoCT&ATAC-seq	H3K27ac	ATAC	K562-H3K27ac-2#44_5	120427760	22949	5247.6	22808	21929	21016	96.1461	3.58852	7629	5080	6.18	31836	4320	3.432
scNanoCT&ATAC-seq	H3K27ac	ATAC	K562-H3K27ac-2#44_6	348526410	70862	4918.4	70344	67420	64171	95.8433	10.325	28196	18625	3.087	92208	12646	2.389
scNanoCT&ATAC-seq	H3K27ac	ATAC	K562-H3K27ac-2#44_7	133588288	28018	4767.9	27647	26743	25494	96.7302	3.97113	11874	8206	5.079	35828	4899	3.483
scNanoCT&ATAC-seq	H3K27ac	ATAC	K562-H3K27ac-2#44_8	268046822	54631	4906.5	54310	51554	49176	94.9254	7.85061	18564	10472	2.272	73581	7787	2.145
scNanoCT&ATAC-seq	H3K27ac	ATAC	K562-H3K27ac-2#44_9	704200220	145565	4837.7	144608	138092	131225	95.494	20.759	55408	35403	3.088	190318	22399	2.308
scNanoCT&ATAC-seq	H3K27ac	ATAC	K562-H3K27ac-2#45_1	245397874	50936	4817.8	50515	48452	46326	95.9161	7.24463	19717	13191	3.229	66690	8287	2.846
scNanoCT&ATAC-seq	H3K27ac	ATAC	K562-H3K27ac-2#45_10	247012560	48832	5058.4	48523	46646	44562	96.1317	7.34663	20240	13680	3.831	63388	10188	2.936
scNanoCT&ATAC-seq	H3K27ac	ATAC	K562-H3K27ac-2#45_11	617441365	150561	4100.9	149676	143463	135855	95.849	18.1161	78394	31170	3.122	176759	12997	2.916
scNanoCT&ATAC-seq	H3K27ac	ATAC	K562-H3K27ac-2#45_12	180883054	37946	4766.9	37591	36210	34392	96.3262	5.37212	24345	16375	3.979	40062	7732	3.148
scNanoCT&ATAC-seq	H3K27ac	ATAC	K562-H3K27ac-2#45_2	466648508	94474	4939.4	93701	89577	85212	95.5988	13.7493	37056	23159	2.923	122074	16454	2.398
scNanoCT&ATAC-seq	H3K27ac	ATAC	K562-H3K27ac-2#45_3	131578456	34194	3848	33839	32391	31110	95.7209	3.79506	17305	11161	3.452	40854	5904	3.168
scNanoCT&ATAC-seq	H3K27ac	ATAC	K562-H3K27ac-2#45_4	103291957	20528	5031.8	20376	19745	18967	96.9032	3.09114	7576	4931	5.407	27911	3314	2.98
scNanoCT&ATAC-seq	H3K27ac	ATAC	K562-H3K27ac-2#45_5	237976806	45799	5196.1	45520	43601	41662	95.7843	7.05537	16989	10709	3.188	61129	7426	2.436
scNanoCT&ATAC-seq	H3K27ac	ATAC	K562-H3K27ac-2#45_6	197541302	46626	4236.7	41665	39926	37807	95.8262	5.74124	17806	10867	3.445	53115	5664	2
scNanoCT&ATAC-seq	H3K27ac	ATAC	K562-H3K27ac-2#45_7	89532253	19737	4536.3	18232	17472	16748	95.8315	2.57928	8330	6435	6.633	22798	4898	4.864
scNanoCT&ATAC-seq	H3K27ac	ATAC	K562-H3K27ac-2#45_8	404059919	79939	5054.6	79450	75784	72116	95.3858	11.9416	28035	17336	3.567	106792	12826	2.675
scNanoCT&ATAC-seq	H3K27ac	ATAC	K562-H3K27ac-2#45_9	123651131	25772	4797.9	25430	24544	23381	96.5159	3.64365	11807	7854	4.693	32008	4656	3.574
scNanoCT&ATAC-seq	H3K27ac	ATAC	K562-H3K27ac-2#46_1	302288042	63327	4773.4	62570	59831	57071	95.6225	8.88289	23547	15290	2.767	82969	9814	2.964
scNanoCT&ATAC-seq	H3K27ac	ATAC	K562-H3K27ac-2#46_10	271842012	55383	4908.4	54849	52888	50203	96.4247	8.10078	25194	16400	3.241	69329	10415	2.517
scNanoCT&ATAC-seq	H3K27ac	ATAC	K562-H3K27ac-2#46_11	214771570	45437	4726.8	43812	42382	40224	96.7361	6.36937	21092	14890	3.87	54434	8742	3.404
scNanoCT&ATAC-seq	H3K27ac	ATAC	K562-H3K27ac-2#46_12	290621338	59909	4851	59344	57045	54289	96.126	8.6137	22124	14175	3.118	80030	9294	2.664
scNanoCT&ATAC-seq	H3K27ac	ATAC	K562-H3K27ac-2#46_2	145086793	30584	4743.9	29848	28734	27174	96.2678	4.27427	20581	14883	4.356	30034	6382	3.615
scNanoCT&ATAC-seq	H3K27ac	ATAC	K562-H3K27ac-2#46_3	147221659	38056	3868.6	37648	35926	34456	95.4261	4.23186	18312	11625	2.626	46142	5935	2.53
scNanoCT&ATAC-seq	H3K27ac	ATAC	K562-H3K27ac-2#46_4	231579848	46186	5014.1	45778	43986	42172	96.0855	6.88419	16028	10547	3.626	62944	7541	2.864
scNanoCT&ATAC-seq	H3K27ac	ATAC	K562-H3K27ac-2#46_5	196357361	39251	5002.6	38951	37023	35386	95.0502	5.77278	14094	8357	2.328	52269	5439	2.032
scNanoCT&ATAC-seq	H3K27ac	ATAC	K562-H3K27ac-2#46_6	393278070	82154	4787.1	81283	78031	74002	95.9992	11.6256	34599	21828	2.917	104208	13846	2.576
scNanoCT&ATAC-seq	H3K27ac	ATAC	K562-H3K27ac-2#46_7	220249088	45730	4816.3	44746	42857	40851	95.7784	6.4351	17296	9917	3.527	59431	5577	2.341
scNanoCT&ATAC-seq	H3K27ac	ATAC	K562-H3K27ac-2#46_8	86939438	19525	4452.7	19179	18605	17582	97.0071	2.58321	19108	13189	4.112	12870	3083	3.738
scNanoCT&ATAC-seq	H3K27ac	ATAC	K562-H3K27ac-2#46_9	376257447	78832	4772.9	77952	74217	70363	95.2086	11.02	27459	14723	2.666	103988	11131	2.073
scNanoCT&ATAC-seq	H3K27ac	ATAC	K562-H3K27ac-2#47_1	344497520	72884	4726.7	72227	68932	65711	95.438	10.0945	29080	17540	2.748	93745	11364	2.346
scNanoCT&ATAC-seq	H3K27ac	ATAC	K562-H3K27ac-2#47_10	254818714	50890	5007.2	50542	48156	45737	95.2792	7.48328	18530	10991	2.716	67440	7882	2.137
scNanoCT&ATAC-seq	H3K27ac	ATAC	K562-H3K27ac-2#47_11	383403036	78696	4872	78178	74975	70988	95.9029	11.3441	34408	21349	2.888	98727	13079	2.686
scNanoCT&ATAC-seq	H3K27ac	ATAC	K562-H3K27ac-2#47_12	215172694	44528	4832.3	44207	42057	39838	95.1365	6.32131	18245	11158	2.65	56349	6919	2.185
scNanoCT&ATAC-seq	H3K27ac	ATAC	K562-H3K27ac-2#47_2	38329274	9970	3844.5	8961	8566	8275	95.592	1.06076	1831	871	3.27	13649	898	2.276
scNanoCT&ATAC-seq	H3K27ac	ATAC	K562-H3K27ac-2#47_3	221520627	57997	3819.5	57572	54992	52685	95.5187	6.40707	30176	19795	2.927	68330	9845	2.626
scNanoCT&ATAC-seq	H3K27ac	ATAC	K562-H3K27ac-2#47_4	127948146	25971	4926.6	25801	24991	23906	96.8606	3.82366	12902	8556	4.077	31808	4736	3.022
scNanoCT&ATAC-seq	H3K27ac	ATAC	K562-H3K27ac-2#47_5	89798063	17369	5170	17270	16681	15922	96.5895	2.67455	7938	5558	4.746	21983	3573	3.996
scNanoCT&ATAC-seq	H3K27ac	ATAC	K562-H3K27ac-2#47_6	231329012	49358	4686.8	48624	46342	43783	95.3068	6.74843	20551	12260	2.425	61601	7368	2.101
scNanoCT&ATAC-seq	H3K27ac	ATAC	K562-H3K27ac-2#47_7	490354220	102045	4805.3	100339	95275	90508	94.9531	14.2902	34151	22106	3.114	134888	15878	2.32
scNanoCT&ATAC-seq	H3K27ac	ATAC	K562-H3K27ac-2#47_8	359718571	70954	5069.7	70362	67306	63993	95.6567	10.6613	23842	15367	2.997	96257	11673	2.349
scNanoCT&ATAC-seq	H3K27ac	ATAC	K562-H3K27ac-2#47_9	294861710	61096	4826.2	60430	57691	54537	95.4675	8.62915	24506	15998	2.928	77528	9923	2.551
scNanoCT&ATAC-seq	H3K27ac	ATAC	K562-H3K27ac-2#48_10	238900516	47091	5073.2	46760	44435	42436	95.0278	7.00879	18099	11194	3.08	61570	6868	2.028
scNanoCT&ATAC-seq	H3K27ac	ATAC	K562-H3K27ac-2#48_11	676435127	137382	4923.8	136405	130593	124457	95.7392	20.0253	55355	35274	3.368	178045	23530	2.555
scNanoCT&ATAC-seq	H3K27ac	ATAC	K562-H3K27ac-2#48_12	217366730	43851	4956.9	43535	41814	39868	96.0469	6.4343	20359	13209	3.267	54320	8203	2.566
scNanoCT&ATAC-seq	H3K27ac	ATAC	K562-H3K27ac-2#48_2	290909825	57544	5055.4	56972	54486	52150	95.6365	8.58946	21160	14089	3.432	76233	9094	2.588
scNanoCT&ATAC-seq	H3K27ac	ATAC	K562-H3K27ac-2#48_3	115122021	32181	3577.3	31891	30560	29575	95.8264	3.3018	15240	10225	2.668	39753	5122	2.595
scNanoCT&ATAC-seq	H3K27ac	ATAC	K562-H3K27ac-2#48_4	375406448	75163	4994.6	74699	70799	68353	94.779	10.9919	23766	13627	2.613	104235	10774	2.029
scNanoCT&ATAC-seq	H3K27ac	ATAC	K562-H3K27ac-2#48_5	231672208	58682	3947.9	58411	56777	54615	97.2026	6.88915	27250	12024	2.908	76047	5177	2.459
scNanoCT&ATAC-seq	H3K27ac	ATAC	K562-H3K27ac-2#48_6	473497900	113962	4154.9	113159	109300	104038	96.5898	13.9411	53475	26092	2.403	142354	12908	2.013
scNanoCT&ATAC-seq	H3K27ac	ATAC	K562-H3K27ac-2#48_7	222614871	45732	4867.8	45196	43300	41277	95.8049	6.53182	20851	13646	3.262	55925	7989	2.627
scNanoCT&ATAC-seq	H3K27ac	ATAC	K562-H3K27ac-2#48_8	112136610	22960	4884	22776	21875	20925	96.0441	3.31308	10454	6861	3.183	28844	4340	2.614
scNanoCT&ATAC-seq	H3K27ac	ATAC	K562-H3K27ac-2#48_9	122670315	26197	4682.6	25766	24740	23565	96.018	3.57438	12999	8386	3.136	31036	4756	2.593
scNanoCT&ATAC-seq	H3K27ac	ATAC	K562-H3K27ac-3#33_1	145998151	37244	3920	32214	30346	29226	94.2013	4.1471	13278	8097	2.85	41376	4942	2.143
scNanoCT&ATAC-seq	H3K27ac	ATAC	K562-H3K27ac-3#33_10	246594069	52132	4730.2	51762	49742	47720	96.0975	7.35772	26101	17718	3.808	63850	10073	3.164
scNanoCT&ATAC-seq	H3K27ac	ATAC	K562-H3K27ac-3#33_11	270866510	62489	4334.6	61434	59217	56934	96.3912	8.0445	24860	14106	2.457	82276	8589	2.038
scNanoCT&ATAC-seq	H3K27ac	ATAC	K562-H3K27ac-3#33_12	286303877	62777	4560.6	61494	58051	55876	94.4011	8.35394	21275	13803	2.752	83567	10003	2.04
scNanoCT&ATAC-seq	H3K27ac	ATAC	K562-H3K27ac-3#33_2	123905952	28280	4381.4	27516	26489	25405	96.2676	3.63884	15257	8934	2.455	33225	4972	1.857
scNanoCT&ATAC-seq	H3K27ac	ATAC	K562-H3K27ac-3#33_3	32690403	8601	3800.8	8430	8115	7857	96.2633	0.937174	3813	3044	4.698	10625	1886	3.718
scNanoCT&ATAC-seq	H3K27ac	ATAC	K562-H3K27ac-3#33_4	85257237	22401	3806	22212	21558	20784	97.0556	2.54247	12384	5925	2.587	26854	2094	1.58
scNanoCT&ATAC-seq	H3K27ac	ATAC	K562-H3K27ac-3#33_5	186515095	38144	4889.8	37777	36399	35085	96.3523	5.61041	13469	8972	3.463	52580	7618	2.376
scNanoCT&ATAC-seq	H3K27ac	ATAC	K562-H3K27ac-3#33_6	294025726	77892	3774.8	64119	60795	58261	94.8159	8.48822	27041	17083	3.186	82530	10096	2.139
scNanoCT&ATAC-seq	H3K27ac	ATAC	K562-H3K27ac-3#33_7	71210827	25077	2839.7	15699	15057	14329	95.9106	1.98799	13335	9753	4.256	13105	3070	3.185
scNanoCT&ATAC-seq	H3K27ac	ATAC	K562-H3K27ac-3#33_8	84552187	25332	3337.8	18001	17297	16614	96.0891	2.43542	8536	5863	3.859	22729	3484	2.803
scNanoCT&ATAC-seq	H3K27ac	ATAC	K562-H3K27ac-3#33_9	94303427	29649	3180.7	20119	19280	18462	95.8298	2.68939	14354	9515	3.819	20069	3921	3.441
scNanoCT&ATAC-seq	H3K27ac	ATAC	K562-H3K27ac-3#34_1	75387611	17835	4226.9	17555	16636	15911	94.765	2.17869	10968	6910	2.61	18969	1406	1.836
scNanoCT&ATAC-seq	H3K27ac	ATAC	K562-H3K27ac-3#34_10	276431538	59380	4655.3	58866	55752	53312	94.71	8.09452	21781	14505	3.062	78441	10035	2.334
scNanoCT&ATAC-seq	H3K27ac	ATAC	K562-H3K27ac-3#34_11	249527447	55315	4511	54579	52260	49842	95.7511	7.36352	23125	16120	2.875	70466	10784	2.694
scNanoCT&ATAC-seq	H3K27ac	ATAC	K562-H3K27ac-3#34_12	261555792	57288	4565.6	56683	54117	51661	95.4731	7.67594	20938	14285	3.479	76045	10253	2.542
scNanoCT&ATAC-seq	H3K27ac	ATAC	K562-H3K27ac-3#34_2	91827805	20314	4520.4	19895	19207	18342	96.5418	2.68517	9938	6748	3.493	24483	3810	2.891
scNanoCT&ATAC-seq	H3K27ac	ATAC	K562-H3K27ac-3#34_3	157094255	41682	3768.9	41243	39550	38009	95.8951	4.55756	18713	12786	2.749	52671	7034	2.24
scNanoCT&ATAC-seq	H3K27ac	ATAC	K562-H3K27ac-3#34_4	100738569	23340	4316.1	23074	22290	21333	96.6022	2.98689	14581	9973	3.922	25230	5106	3.036
scNanoCT&ATAC-seq	H3K27ac	ATAC	K562-H3K27ac-3#34_5	332557727	70112	4743.2	69481	66050	63373	95.062	9.74727	24016	15450	2.999	95161	10500	2.357
scNanoCT&ATAC-seq	H3K27ac	ATAC	K562-H3K27ac-3#34_6	15485884	13600	1138.7	3819	3387	3259	88.6881	0.277663	1974	898	4.31	4754	219	2.116
scNanoCT&ATAC-seq	H3K27ac	ATAC	K562-H3K27ac-3#34_7	170488889	40824	4176.2	37288	35507	33788	95.2237	4.92904	18683	11067	2.565	44243	6125	2.32
scNanoCT&ATAC-seq	H3K27ac	ATAC	K562-H3K27ac-3#34_8	158941446	36393	4367.4	33831	32091	30700	94.8568	4.63835	11673	7325	2.896	45874	5684	2.129
scNanoCT&ATAC-seq	H3K27ac	ATAC	K562-H3K27ac-3#34_9	243257148	57168	4255.1	52458	50169	47924	95.6365	7.09883	20389	13899	3.66	69413	9281	2.803
scNanoCT&ATAC-seq	H3K27ac	ATAC	K562-H3K27ac-3#35_1	180441225	39991	4512	38636	36455	35076	94.355	5.22881	14367	8837	2.867	51539	5882	2.055
scNanoCT&ATAC-seq	H3K27ac	ATAC	K562-H3K27ac-3#35_10	225030847	47976	4690.5	46913	44875	42968	95.6558	6.66091	20898	13830	3.227	59962	9257	2.812
scNanoCT&ATAC-seq	H3K27ac	ATAC	K562-H3K27ac-3#35_11	156971383	36402	4312.2	35518	34224	32481	96.3568	4.66589	22547	15671	3.454	38549	7774	3.249
scNanoCT&ATAC-seq	H3K27ac	ATAC	K562-H3K27ac-3#35_12	185531100	40770	4550.7	40370	38711	36941	95.8905	5.47435	17339	11280	2.976	52328	7869	2.511
scNanoCT&ATAC-seq	H3K27ac	ATAC	K562-H3K27ac-3#35_2	258496543	59092	4374.5	56334	54069	51690	95.9793	7.65528	26279	15572	2.839	70965	8374	2.187
scNanoCT&ATAC-seq	H3K27ac	ATAC	K562-H3K27ac-3#35_3	47362592	12677	3736.1	12440	11803	11316	94.8794	1.34945	10603	6979	2.794	10458	923	2.562
scNanoCT&ATAC-seq	H3K27ac	ATAC	K562-H3K27ac-3#35_4	163993146	34210	4793.7	33857	32183	31012	95.0557	4.82214	13873	9261	3.152	44199	6821	2.568
scNanoCT&ATAC-seq	H3K27ac	ATAC	K562-H3K27ac-3#35_5	164738955	34818	4731.4	34265	32875	31496	95.9434	4.90408	16691	10643	3.795	42468	6283	2.326
scNanoCT&ATAC-seq	H3K27ac	ATAC	K562-H3K27ac-3#35_6	244723817	129740	1886.3	55842	51582	49438	92.3713	6.02532	23277	15387	2.398	69953	7672	2.338
scNanoCT&ATAC-seq	H3K27ac	ATAC	K562-H3K27ac-3#35_7	118911776	45416	2618.3	30273	28706	27404	94.8238	3.24936	16288	10919	3.496	35138	5538	3.194
scNanoCT&ATAC-seq	H3K27ac	ATAC	K562-H3K27ac-3#35_8	130506809	39720	3285.7	35516	34414	32914	96.8972	3.80654	18482	9095	2.607	43968	4216	2.21
scNanoCT&ATAC-seq	H3K27ac	ATAC	K562-H3K27ac-3#35_9	64498760	33188	1943.4	14315	13564	12905	94.7538	1.6683	11708	9142	5.225	12362	3420	4.831
scNanoCT&ATAC-seq	H3K27ac	ATAC	K562-H3K27ac-3#36_1	29383359	6800	4321.1	6505	6222	6060	95.6495	0.853946	2368	1410	1.98	9005	702	2.602
scNanoCT&ATAC-seq	H3K27ac	ATAC	K562-H3K27ac-3#36_10	96673787	20940	4616.7	20387	19556	18673	95.9239	2.85386	10390	6764	3.72	24604	4627	2.54
scNanoCT&ATAC-seq	H3K27ac	ATAC	K562-H3K27ac-3#36_11	253089337	57058	4435.7	56198	53897	51225	95.9055	7.47896	24941	17041	3.062	71248	10019	2.869
scNanoCT&ATAC-seq	H3K27ac	ATAC	K562-H3K27ac-3#36_12	103126032	27059	3811.2	26635	24926	23819	93.5836	2.89354	14007	6859	4.12	30953	2516	3.806
scNanoCT&ATAC-seq	H3K27ac	ATAC	K562-H3K27ac-3#36_2	171534478	38995	4398.9	37479	36028	34276	96.1285	5.0942	21908	15056	3.315	42335	8707	2.916
scNanoCT&ATAC-seq	H3K27ac	ATAC	K562-H3K27ac-3#36_3	114163588	36276	3147.1	35785	34835	33703	97.3453	3.3063	19090	8533	2.703	44508	3259	2.337
scNanoCT&ATAC-seq	H3K27ac	ATAC	K562-H3K27ac-3#36_4	220572106	45120	4888.6	44697	42809	41154	95.776	6.53546	18642	12170	3.002	57868	8083	2.476
scNanoCT&ATAC-seq	H3K27ac	ATAC	K562-H3K27ac-3#36_5	256174269	53405	4796.8	52903	50032	47866	94.5731	7.46467	18051	9971	2.169	71793	7521	1.925
scNanoCT&ATAC-seq	H3K27ac	ATAC	K562-H3K27ac-3#36_6	166411721	90469	1839.4	51487	30147	28831	58.5526	4.05345	15315	10522	3.896	38990	5757	2.93
scNanoCT&ATAC-seq	H3K27ac	ATAC	K562-H3K27ac-3#36_7	105481431	34855	3026.3	22096	20983	19983	94.9629	2.9201	11271	7263	2.898	26205	2009	2.205
scNanoCT&ATAC-seq	H3K27ac	ATAC	K562-H3K27ac-3#36_8	275471464	62860	4382.3	60090	57409	54842	95.5384	8.09119	26298	16869	3.276	76749	11101	2.366
scNanoCT&ATAC-seq	H3K27ac	ATAC	K562-H3K27ac-3#36_9	165403722	60487	2734.5	40417	38930	37176	96.3209	4.61192	18752	11090	3.821	51306	6633	2.754
scNanoCT&ATAC-seq	H3K27ac	ATAC	K562-H3K27ac-3#37_1	267113579	57967	4608	57230	54335	52143	94.9415	7.80084	20983	13871	2.353	76534	10169	2.247
scNanoCT&ATAC-seq	H3K27ac	ATAC	K562-H3K27ac-3#37_10	220265829	47045	4682	46293	44083	42100	95.2261	6.47861	17428	11314	2.897	61689	8343	2.129
scNanoCT&ATAC-seq	H3K27ac	ATAC	K562-H3K27ac-3#37_11	113874336	25823	4409.8	25284	24220	23052	95.7918	3.32725	14443	9495	3.636	28860	4760	2.305
scNanoCT&ATAC-seq	H3K27ac	ATAC	K562-H3K27ac-3#37_12	162402753	44563	3644.3	43467	41250	39605	94.8996	4.66359	20445	11019	3.278	54569	4912	3.664
scNanoCT&ATAC-seq	H3K27ac	ATAC	K562-H3K27ac-3#37_2	342983041	73779	4648.8	72258	68388	65540	94.6442	10.037	24125	15892	2.854	98614	11920	2.301
scNanoCT&ATAC-seq	H3K27ac	ATAC	K562-H3K27ac-3#37_3	27261833	7310	3729.4	7157	6889	6661	96.2554	0.793113	3345	2363	4.62	8858	1331	3.708
scNanoCT&ATAC-seq	H3K27ac	ATAC	K562-H3K27ac-3#37_4	87784352	17235	5093.4	17027	16254	15707	95.4602	2.60447	5535	4285	7.349	23815	4518	5.284
scNanoCT&ATAC-seq	H3K27ac	ATAC	K562-H3K27ac-3#37_5	130868837	27532	4753.3	27133	25782	24721	95.0208	3.86045	10555	6423	2.822	35846	4293	2.121
scNanoCT&ATAC-seq	H3K27ac	ATAC	K562-H3K27ac-3#37_6	263320166	71232	3696.7	56366	53599	51067	95.091	7.55171	23183	15390	2.748	72547	9520	2.373
scNanoCT&ATAC-seq	H3K27ac	ATAC	K562-H3K27ac-3#37_7	140788994	50687	2777.6	32544	30628	29211	94.1126	3.81929	15281	9318	3.183	39294	5268	2.457
scNanoCT&ATAC-seq	H3K27ac	ATAC	K562-H3K27ac-3#37_8	235536693	63694	3697.9	50434	47452	45411	94.0873	6.71112	17986	10482	2.285	67102	7576	2.134
scNanoCT&ATAC-seq	H3K27ac	ATAC	K562-H3K27ac-3#37_9	222042601	59761	3715.5	47165	44829	42776	95.0472	6.34392	19947	12928	3.145	59945	8074	2.255
scNanoCT&ATAC-seq	H3K27ac	ATAC	K562-H3K27ac-3#38_1	108637940	24618	4412.9	24161	23159	22385	95.8528	3.19221	11877	6875	2.325	29898	3365	2.023
scNanoCT&ATAC-seq	H3K27ac	ATAC	K562-H3K27ac-3#38_10	295176550	62913	4691.8	62122	59328	57283	95.5024	8.72274	28751	18734	3.112	78812	12184	2.737
scNanoCT&ATAC-seq	H3K27ac	ATAC	K562-H3K27ac-3#38_11	187910244	41415	4537.3	40839	39088	37679	95.7124	5.52339	16020	10077	2.485	54560	6751	1.999
scNanoCT&ATAC-seq	H3K27ac	ATAC	K562-H3K27ac-3#38_12	250762271	55114	4549.9	54486	52039	50218	95.5089	7.41546	19692	12797	2.916	74685	9358	2.355
scNanoCT&ATAC-seq	H3K27ac	ATAC	K562-H3K27ac-3#38_2	131718702	28653	4597	28023	26863	25890	95.8605	3.88088	13080	8895	3.308	35378	5698	2.66
scNanoCT&ATAC-seq	H3K27ac	ATAC	K562-H3K27ac-3#38_3	89755536	23368	3841	23043	21884	21240	94.9703	2.58928	10965	6803	2.96	28587	3439	2.304
scNanoCT&ATAC-seq	H3K27ac	ATAC	K562-H3K27ac-3#38_4	196928985	41330	4764.8	40900	39115	37945	95.6357	5.85322	16697	10079	2.604	54115	6151	2.121
scNanoCT&ATAC-seq	H3K27ac	ATAC	K562-H3K27ac-3#38_5	136546555	28642	4767.4	28234	26892	25969	95.2469	3.98989	13247	7898	2.663	35319	4845	2.141
scNanoCT&ATAC-seq	H3K27ac	ATAC	K562-H3K27ac-3#38_6	265432187	97192	2731	56755	53157	51277	93.6605	7.26023	22364	14871	2.628	73716	9733	2.453
scNanoCT&ATAC-seq	H3K27ac	ATAC	K562-H3K27ac-3#38_7	193104497	56473	3419.4	41706	39698	38285	95.1853	5.46697	18228	12184	2.926	52848	7429	2.815
scNanoCT&ATAC-seq	H3K27ac	ATAC	K562-H3K27ac-3#38_8	312758812	77419	4039.8	71117	66984	64861	94.1885	9.02892	21755	7888	2.254	100190	1861	1.311
scNanoCT&ATAC-seq	H3K27ac	ATAC	K562-H3K27ac-3#38_9	347241348	96764	3588.5	74116	70844	68353	95.5853	9.9818	30305	20726	3.384	97878	13259	2.723
scNanoCT&ATAC-seq	H3K27ac	ATAC	K562-H3K27ac-3#39_1	199076748	42859	4644.9	42309	40567	39066	95.8827	5.9022	17221	11330	2.758	55722	7565	2.533
scNanoCT&ATAC-seq	H3K27ac	ATAC	K562-H3K27ac-3#39_10	14313330	4429	3231.7	4189	4018	3857	95.9179	0.406913	3923	2341	3.443	3347	546	2.547
scNanoCT&ATAC-seq	H3K27ac	ATAC	K562-H3K27ac-3#39_11	264967777	55677	4759	55109	52562	50644	95.3783	7.81916	14740	9742	3.04	80389	9386	2.297
scNanoCT&ATAC-seq	H3K27ac	ATAC	K562-H3K27ac-3#39_12	116279700	28578	4068.9	28243	26804	25727	94.9049	3.37217	13074	8120	2.584	35494	4551	2.093
scNanoCT&ATAC-seq	H3K27ac	ATAC	K562-H3K27ac-3#39_2	266157139	60731	4382.6	58306	55385	53286	94.9902	7.76329	21699	13793	2.666	78069	9820	2.303
scNanoCT&ATAC-seq	H3K27ac	ATAC	K562-H3K27ac-3#39_3	40179814	10747	3738.7	10507	10024	9657	95.4031	1.14873	6145	4109	2.836	11637	1636	2.502
scNanoCT&ATAC-seq	H3K27ac	ATAC	K562-H3K27ac-3#39_4	160606002	37014	4339.1	36526	34869	33721	95.4635	4.71998	14582	9337	2.993	48578	5863	2.214
scNanoCT&ATAC-seq	H3K27ac	ATAC	K562-H3K27ac-3#39_5	169284777	35386	4783.9	34914	33455	32154	95.8212	5.02001	15146	10097	3.711	45191	6557	2.844
scNanoCT&ATAC-seq	H3K27ac	ATAC	K562-H3K27ac-3#39_6	119434743	121870	980	22657	19234	18712	84.8921	2.01582	9158	5787	2.703	26030	3050	2.527
scNanoCT&ATAC-seq	H3K27ac	ATAC	K562-H3K27ac-3#39_7	175576787	49575	3541.6	39469	37815	36204	95.8094	5.05415	19773	13751	3.575	48094	7782	3.125
scNanoCT&ATAC-seq	H3K27ac	ATAC	K562-H3K27ac-3#39_8	148885919	38499	3867.3	37600	36039	34696	95.8484	4.33126	17023	11077	2.621	48433	6651	2.269
scNanoCT&ATAC-seq	H3K27ac	ATAC	K562-H3K27ac-3#39_9	122049264	41619	2932.5	24808	23397	22538	94.3123	3.36314	8428	6641	5.692	33647	6282	3.998
scNanoCT&ATAC-seq	H3K27ac	ATAC	K562-H3K27ac-3#40_1	188414170	41506	4539.4	40961	39414	37686	96.2232	5.58379	18226	12425	2.992	52430	7156	2.394
scNanoCT&ATAC-seq	H3K27ac	ATAC	K562-H3K27ac-3#40_10	242680122	64654	3753.5	63913	61061	58817	95.5377	7.0269	23938	10157	3.269	87724	3853	2.478
scNanoCT&ATAC-seq	H3K27ac	ATAC	K562-H3K27ac-3#40_11	323866997	71329	4540.5	70527	67409	64100	95.579	9.51787	26122	17199	2.664	94228	13393	2.192
scNanoCT&ATAC-seq	H3K27ac	ATAC	K562-H3K27ac-3#40_12	169147132	37330	4531.1	36815	35009	33408	95.0944	4.9323	14798	9062	2.68	48146	6123	2.07
scNanoCT&ATAC-seq	H3K27ac	ATAC	K562-H3K27ac-3#40_2	82266997	18016	4566.3	17481	16832	16066	96.2874	2.42701	8327	5563	4.274	21872	3080	2.658
scNanoCT&ATAC-seq	H3K27ac	ATAC	K562-H3K27ac-3#40_3	45297792	12291	3685.4	12070	11651	11189	96.5286	1.32265	6318	4604	4.484	14475	2382	3.676
scNanoCT&ATAC-seq	H3K27ac	ATAC	K562-H3K27ac-3#40_4	185875073	38714	4801.2	38452	36419	35088	94.7129	5.44845	12781	7444	2.722	52927	5735	2.011
scNanoCT&ATAC-seq	H3K27ac	ATAC	K562-H3K27ac-3#40_5	179030595	45923	3898.5	45581	44221	42507	97.0163	5.2889	21616	9420	3.284	59062	3424	2.986
scNanoCT&ATAC-seq	H3K27ac	ATAC	K562-H3K27ac-3#40_6	159581354	102842	1551.7	34036	29665	28356	87.1577	3.72155	12576	9750	4.26	40954	6889	3.283
scNanoCT&ATAC-seq	H3K27ac	ATAC	K562-H3K27ac-3#40_7	200717937	57126	3513.6	43701	41955	40015	96.0047	5.77533	20924	14489	3.519	54256	7866	2.997
scNanoCT&ATAC-seq	H3K27ac	ATAC	K562-H3K27ac-3#40_8	71461472	24103	2964.8	14825	13894	13274	93.7201	1.94097	7975	5594	3.254	17106	2741	3.393
scNanoCT&ATAC-seq	H3K27ac	ATAC	K562-H3K27ac-3#40_9	255435153	99805	2559.3	71485	69162	65948	96.7504	7.17479	33395	10536	1.533	91734	3957	2.069
scNanoCT&ATAC-seq	H3K27ac	ATAC	K562-H3K27ac-4#41_10	56465138	11320	4988.1	11190	10795	10456	96.4701	1.6704	5391	3824	5.707	14259	2248	3.605
scNanoCT&ATAC-seq	H3K27ac	ATAC	K562-H3K27ac-4#41_11	154900590	33009	4692.7	32634	31193	30018	95.5844	4.59541	17270	10940	3.236	39024	6412	2.506
scNanoCT&ATAC-seq	H3K27ac	ATAC	K562-H3K27ac-4#41_12	164315127	34541	4757.1	34266	32569	31425	95.0476	4.80181	14384	9477	3.05	44695	6226	2.693
scNanoCT&ATAC-seq	H3K27ac	ATAC	K562-H3K27ac-4#41_2	77070654	16344	4715.5	16086	15554	14998	96.6928	2.29924	8373	5514	3.685	19705	2947	2.748
scNanoCT&ATAC-seq	H3K27ac	ATAC	K562-H3K27ac-4#41_4	178855325	36281	4929.7	35975	34275	33248	95.2745	5.29025	13134	8560	2.799	48971	6728	2.224
scNanoCT&ATAC-seq	H3K27ac	ATAC	K562-H3K27ac-4#41_5	163443978	32821	4979.9	32557	30875	29798	94.8337	4.80265	13079	7300	2.356	42897	5021	1.902
scNanoCT&ATAC-seq	H3K27ac	ATAC	K562-H3K27ac-4#41_6	275118662	66599	4131	56307	53488	51536	94.9935	7.9689	23348	16152	4.09	73581	10745	2.966
scNanoCT&ATAC-seq	H3K27ac	ATAC	K562-H3K27ac-4#41_7	194547039	41465	4691.8	40208	38292	36860	95.2348	5.71345	17597	10964	2.801	51444	6817	2.33
scNanoCT&ATAC-seq	H3K27ac	ATAC	K562-H3K27ac-4#41_8	60477709	13961	4331.9	13772	13297	12800	96.551	1.80253	11374	8127	4.533	12525	2508	3.681
scNanoCT&ATAC-seq	H3K27ac	ATAC	K562-H3K27ac-4#41_9	521028521	108605	4797.5	107323	102502	98808	95.508	15.4693	39080	24799	2.801	146195	18844	2.263
scNanoCT&ATAC-seq	H3K27ac	ATAC	K562-H3K27ac-4#42_1	235847976	51728	4559.4	51157	48948	47289	95.6819	6.97576	22351	13354	2.806	65997	8318	2.312
scNanoCT&ATAC-seq	H3K27ac	ATAC	K562-H3K27ac-4#42_10	203855543	41139	4955.3	40816	39090	37762	95.7713	6.03859	14859	9495	2.597	56121	6747	2.39
scNanoCT&ATAC-seq	H3K27ac	ATAC	K562-H3K27ac-4#42_11	229307535	48395	4738.2	47883	45765	44173	95.5767	6.75761	17424	11120	2.713	65439	8436	2.396
scNanoCT&ATAC-seq	H3K27ac	ATAC	K562-H3K27ac-4#42_12	152531121	32509	4692	32225	30636	29537	95.069	4.48094	12586	7346	2.429	42853	5167	1.94
scNanoCT&ATAC-seq	H3K27ac	ATAC	K562-H3K27ac-4#42_2	95428168	20013	4768.3	19402	18705	18034	96.4076	2.82699	7961	5242	3.801	25598	3815	2.773
scNanoCT&ATAC-seq	H3K27ac	ATAC	K562-H3K27ac-4#42_3	166697853	42756	3898.8	42287	40385	38992	95.5022	4.84028	23495	14807	3.319	49583	7385	2.572
scNanoCT&ATAC-seq	H3K27ac	ATAC	K562-H3K27ac-4#42_4	166886472	33541	4975.6	33247	31530	30591	94.8356	4.91746	11780	7103	2.982	45398	5508	2.252
scNanoCT&ATAC-seq	H3K27ac	ATAC	K562-H3K27ac-4#42_5	217025200	43381	5002.8	43052	40697	39304	94.5299	6.38598	16157	10445	2.828	57508	7483	2.29
scNanoCT&ATAC-seq	H3K27ac	ATAC	K562-H3K27ac-4#42_6	171943957	39206	4385.7	36715	34985	33735	95.288	4.99149	14900	8540	2.053	48332	5732	1.694
scNanoCT&ATAC-seq	H3K27ac	ATAC	K562-H3K27ac-4#42_7	79633596	18114	4396.2	17149	16448	15873	95.9123	2.31032	8368	5574	3.774	21248	3284	2.64
scNanoCT&ATAC-seq	H3K27ac	ATAC	K562-H3K27ac-4#42_8	261515147	55333	4726.2	54406	51696	49817	95.0189	7.70764	19549	12677	2.431	74031	9508	2.118
scNanoCT&ATAC-seq	H3K27ac	ATAC	K562-H3K27ac-4#42_9	516348088	108298	4767.8	107276	102326	98532	95.3857	15.2158	38446	24610	2.829	145949	18118	2.165
scNanoCT&ATAC-seq	H3K27ac	ATAC	K562-H3K27ac-4#43_1	291921207	60608	4816.5	60095	56913	54901	94.7051	8.54985	18841	11716	2.832	84209	9176	2.301
scNanoCT&ATAC-seq	H3K27ac	ATAC	K562-H3K27ac-4#43_10	251254857	50370	4988.2	50040	47899	46236	95.7214	7.4438	17942	11658	2.729	69257	8758	2.217
scNanoCT&ATAC-seq	H3K27ac	ATAC	K562-H3K27ac-4#43_11	230612235	48282	4776.4	47875	45840	44170	95.7493	6.83169	19529	12584	3.029	63785	8354	2.552
scNanoCT&ATAC-seq	H3K27ac	ATAC	K562-H3K27ac-4#43_12	189000812	39279	4811.8	39001	37143	35758	95.236	5.5765	15189	9095	3.06	52239	6653	2.181
scNanoCT&ATAC-seq	H3K27ac	ATAC	K562-H3K27ac-4#43_2	184350504	37664	4894.6	37324	35706	34338	95.665	5.47153	17533	11142	2.934	46858	7368	2.245
scNanoCT&ATAC-seq	H3K27ac	ATAC	K562-H3K27ac-4#43_3	69629456	17730	3927.2	17548	16768	16229	95.555	2.02009	10126	6162	2.804	20211	3078	2.51
scNanoCT&ATAC-seq	H3K27ac	ATAC	K562-H3K27ac-4#43_4	61883118	12392	4993.8	12274	11847	11462	96.5211	1.85351	5708	3786	5.592	15764	2411	3.241
scNanoCT&ATAC-seq	H3K27ac	ATAC	K562-H3K27ac-4#43_5	318329472	63838	4986.5	63359	60598	58283	95.6423	9.47358	23512	13858	2.456	86026	9602	2.333
scNanoCT&ATAC-seq	H3K27ac	ATAC	K562-H3K27ac-4#43_6	87610435	18069	4848.7	17752	17221	16609	97.0088	2.64011	6492	4598	4.306	24659	3210	3.038
scNanoCT&ATAC-seq	H3K27ac	ATAC	K562-H3K27ac-4#43_7	22051557	4278	5154.6	3960	3720	3631	93.9394	0.639657	2287	1401	3.833	5069	822	2.289
scNanoCT&ATAC-seq	H3K27ac	ATAC	K562-H3K27ac-4#43_8	235460769	49155	4790.2	48730	46566	44796	95.5592	6.98734	17552	11072	2.686	66654	7815	2.296
scNanoCT&ATAC-seq	H3K27ac	ATAC	K562-H3K27ac-4#43_9	228282092	47078	4849	46616	44652	42981	95.7869	6.78122	18582	12429	3.191	62129	8737	2.878
scNanoCT&ATAC-seq	H3K27ac	ATAC	K562-H3K27ac-4#44_1	166990678	34978	4774.2	34579	32883	31854	95.0953	4.92352	14547	8853	3.118	45148	6216	2.469
scNanoCT&ATAC-seq	H3K27ac	ATAC	K562-H3K27ac-4#44_11	234618609	50205	4673.2	49661	47378	45905	95.4028	6.9321	22270	14091	3.441	63937	8689	2.438
scNanoCT&ATAC-seq	H3K27ac	ATAC	K562-H3K27ac-4#44_12	154410480	33183	4653.3	32856	31471	30412	95.7846	4.57753	13044	8605	2.859	44299	6080	2.407
scNanoCT&ATAC-seq	H3K27ac	ATAC	K562-H3K27ac-4#44_2	229307415	45674	5020.5	45055	42702	41312	94.7775	6.72179	16192	10689	2.937	61239	8522	2.078
scNanoCT&ATAC-seq	H3K27ac	ATAC	K562-H3K27ac-4#44_3	144186029	35267	4088.4	34905	33445	32546	95.8172	4.22898	15419	9237	2.499	45842	5478	1.915
scNanoCT&ATAC-seq	H3K27ac	ATAC	K562-H3K27ac-4#44_4	80148256	18208	4401.8	18022	17408	16934	96.5931	2.37198	8027	4642	3.413	23844	2849	2.362
scNanoCT&ATAC-seq	H3K27ac	ATAC	K562-H3K27ac-4#44_5	237381509	45855	5176.8	45488	43179	41778	94.9239	7.03623	15677	10203	3.418	62797	8157	2.328
scNanoCT&ATAC-seq	H3K27ac	ATAC	K562-H3K27ac-4#44_6	267613051	61729	4335.3	53126	50571	48909	95.1907	7.78206	19908	12821	2.812	71532	9783	2.262
scNanoCT&ATAC-seq	H3K27ac	ATAC	K562-H3K27ac-4#44_7	76260452	22928	3326.1	15466	14706	14250	95.086	2.12591	7021	4698	3.203	19905	2843	2.539
scNanoCT&ATAC-seq	H3K27ac	ATAC	K562-H3K27ac-4#44_8	21585731	6406	3369.6	5696	5349	5197	93.908	0.597916	3560	1736	2.597	7262	494	2.409
scNanoCT&ATAC-seq	H3K27ac	ATAC	K562-H3K27ac-4#44_9	323361215	69916	4625	67309	64154	62088	95.3127	9.50177	22857	13416	2.553	93523	10798	2.197
scNanoCT&ATAC-seq	H3K27ac	ATAC	K562-H3K27ac-4#45_1	146195169	31427	4651.9	30914	29925	28871	96.8008	4.3586	13640	9190	4.499	40361	6401	3.08
scNanoCT&ATAC-seq	H3K27ac	ATAC	K562-H3K27ac-4#45_10	70394098	14775	4764.4	14570	13966	13540	95.8545	2.08953	6884	4257	1.995	18655	2487	2.496
scNanoCT&ATAC-seq	H3K27ac	ATAC	K562-H3K27ac-4#45_11	219355095	47210	4646.4	46551	44677	43117	95.9743	6.51844	19110	12464	2.874	61593	8197	2.29
scNanoCT&ATAC-seq	H3K27ac	ATAC	K562-H3K27ac-4#45_12	34544439	7171	4817.2	7003	6751	6530	96.4015	1.02777	2428	1903	6.705	9706	1908	4.977
scNanoCT&ATAC-seq	H3K27ac	ATAC	K562-H3K27ac-4#45_2	153252691	32392	4731.2	31877	30444	29301	95.5046	4.51757	13533	8461	2.523	41160	5575	2.134
scNanoCT&ATAC-seq	H3K27ac	ATAC	K562-H3K27ac-4#45_3	221284805	55435	3991.8	54896	52214	50604	95.1144	6.41003	23118	14805	2.69	71844	8533	2.197
scNanoCT&ATAC-seq	H3K27ac	ATAC	K562-H3K27ac-4#45_4	88557787	22854	3874.9	22631	22192	21467	98.0602	2.64787	12382	4835	2.214	28178	1925	1.702
scNanoCT&ATAC-seq	H3K27ac	ATAC	K562-H3K27ac-4#45_5	361783074	78497	4608.9	77851	74861	72203	96.1593	10.7392	33581	18365	3.711	102431	12323	2.267
scNanoCT&ATAC-seq	H3K27ac	ATAC	K562-H3K27ac-4#45_6	216215349	55667	3884.1	44157	41859	40351	94.7958	6.19588	18198	11701	3.642	57390	8402	3.082
scNanoCT&ATAC-seq	H3K27ac	ATAC	K562-H3K27ac-4#45_7	75676184	19060	3970.4	15841	15062	14544	95.0824	2.17785	8186	5478	2.574	18720	2471	2.625
scNanoCT&ATAC-seq	H3K27ac	ATAC	K562-H3K27ac-4#45_8	222436620	47776	4655.8	45974	43924	42367	95.541	6.56211	18971	12598	3.372	60562	8664	2.823
scNanoCT&ATAC-seq	H3K27ac	ATAC	K562-H3K27ac-4#45_9	201293920	46104	4366.1	41709	40111	38701	96.1687	5.92203	15338	10639	3.806	57077	8155	2.585
scNanoCT&ATAC-seq	H3K27ac	ATAC	K562-H3K27ac-4#46_1	223125483	48392	4610.8	47645	45561	44094	95.626	6.58635	18516	12360	3.676	63876	9180	2.6
scNanoCT&ATAC-seq	H3K27ac	ATAC	K562-H3K27ac-4#46_10	97237951	20969	4637.2	20432	19437	18816	95.1302	2.85639	10017	6043	2.818	25309	3468	1.826
scNanoCT&ATAC-seq	H3K27ac	ATAC	K562-H3K27ac-4#46_11	219193587	48748	4496.5	46285	44263	42865	95.6314	6.44315	17429	10878	2.533	62815	6786	2.386
scNanoCT&ATAC-seq	H3K27ac	ATAC	K562-H3K27ac-4#46_12	174368742	39273	4439.9	38694	36893	35634	95.3455	5.10419	15154	9759	3.353	51643	5873	2.354
scNanoCT&ATAC-seq	H3K27ac	ATAC	K562-H3K27ac-4#46_2	270005467	57393	4704.5	56118	53751	51635	95.7821	7.98068	27921	18361	3.165	68549	11572	2.621
scNanoCT&ATAC-seq	H3K27ac	ATAC	K562-H3K27ac-4#46_3	131439006	33954	3871.1	33430	32265	31253	96.5151	3.86062	17037	9712	2.858	41599	5162	2.256
scNanoCT&ATAC-seq	H3K27ac	ATAC	K562-H3K27ac-4#46_4	49653463	11345	4376.7	11072	10561	10274	95.3848	1.45871	4699	3065	4.003	14548	2019	2.672
scNanoCT&ATAC-seq	H3K27ac	ATAC	K562-H3K27ac-4#46_5	150517137	30939	4865	30234	28951	27951	95.7564	4.44493	12629	8006	3.434	39832	5658	2.309
scNanoCT&ATAC-seq	H3K27ac	ATAC	K562-H3K27ac-4#46_6	79019282	55456	1424.9	17795	15401	14913	86.5468	1.75545	8567	5567	3.028	19463	2987	2.059
scNanoCT&ATAC-seq	H3K27ac	ATAC	K562-H3K27ac-4#46_7	133570951	33562	3979.8	28961	27652	26653	95.4801	3.84632	14571	8530	2.785	35000	5070	2.021
scNanoCT&ATAC-seq	H3K27ac	ATAC	K562-H3K27ac-4#46_8	154147961	36680	4202.5	35027	33176	32117	94.7155	4.46326	13327	7352	2.136	46919	4765	1.649
scNanoCT&ATAC-seq	H3K27ac	ATAC	K562-H3K27ac-4#46_9	70021744	16281	4300.8	14440	13793	13340	95.5194	1.99253	6232	4257	5.124	18938	3395	2.935
scNanoCT&ATAC-seq	H3K27ac	ATAC	K562-H3K27ac-4#47_1	116628988	25052	4655.5	24663	23462	22538	95.1304	3.43381	14644	10351	4.335	27486	5738	3.063
scNanoCT&ATAC-seq	H3K27ac	ATAC	K562-H3K27ac-4#47_10	224274622	44221	5071.7	43817	41792	40423	95.3785	6.63429	15837	10158	3.401	60084	7866	2.49
scNanoCT&ATAC-seq	H3K27ac	ATAC	K562-H3K27ac-4#47_11	98081799	20526	4778.4	20280	19504	19011	96.1736	2.92544	5063	2751	3.52	30569	2376	2.214
scNanoCT&ATAC-seq	H3K27ac	ATAC	K562-H3K27ac-4#47_12	80353582	16173	4968.4	15975	15245	14734	95.4304	2.37371	5047	3678	3.965	22565	3404	3.582
scNanoCT&ATAC-seq	H3K27ac	ATAC	K562-H3K27ac-4#47_2	236217013	47091	5016.2	46487	44709	43048	96.1753	7.06455	14933	9260	3.606	65843	8276	2.367
scNanoCT&ATAC-seq	H3K27ac	ATAC	K562-H3K27ac-4#47_3	110697894	27002	4099.6	26711	25536	24759	95.6011	3.22899	11196	6530	2.726	34983	3968	2.021
scNanoCT&ATAC-seq	H3K27ac	ATAC	K562-H3K27ac-4#47_4	187670985	37455	5010.6	37122	35166	34088	94.7309	5.51013	12031	7265	2.271	51427	5923	2.185
scNanoCT&ATAC-seq	H3K27ac	ATAC	K562-H3K27ac-4#47_5	97010319	19040	5095.1	18875	18269	17612	96.7894	2.93056	6723	4561	5.159	26417	4098	2.769
scNanoCT&ATAC-seq	H3K27ac	ATAC	K562-H3K27ac-4#47_6	229369511	51020	4495.7	47020	45033	43538	95.7741	6.7239	14464	8706	2.4	67367	7392	2.276
scNanoCT&ATAC-seq	H3K27ac	ATAC	K562-H3K27ac-4#47_7	184190189	38822	4744.5	37678	35614	34429	94.522	5.3158	13243	7575	2.361	51002	5213	1.746
scNanoCT&ATAC-seq	H3K27ac	ATAC	K562-H3K27ac-4#47_8	177660816	38461	4619.2	38042	36336	35036	95.5155	5.24673	13696	8648	2.394	52166	6985	2.144
scNanoCT&ATAC-seq	H3K27ac	ATAC	K562-H3K27ac-4#47_9	281191814	57534	4887.4	56631	54168	52214	95.6508	8.30819	21391	13020	3.239	76322	9229	2.379
scNanoCT&ATAC-seq	H3K27ac	ATAC	K562-H3K27ac-4#48_1	292718484	63310	4623.6	62574	59913	57590	95.7474	8.65124	22830	14175	2.764	85240	10147	2.183
scNanoCT&ATAC-seq	H3K27ac	ATAC	K562-H3K27ac-4#48_10	232362185	47473	4894.6	46997	44860	43197	95.4529	6.89126	17275	10826	2.623	63707	8155	2.424
scNanoCT&ATAC-seq	H3K27ac	ATAC	K562-H3K27ac-4#48_11	310030730	64644	4796	63713	60521	58355	94.99	9.07017	19186	12555	2.758	90380	11020	2.188
scNanoCT&ATAC-seq	H3K27ac	ATAC	K562-H3K27ac-4#48_12	189598198	39794	4764.5	39351	37807	36429	96.0763	5.62997	18763	12346	3.567	49479	7646	2.672
scNanoCT&ATAC-seq	H3K27ac	ATAC	K562-H3K27ac-4#48_2	254804984	52451	4858	51768	49696	47552	95.9975	7.55515	23487	14048	3.024	65592	9282	2.439
scNanoCT&ATAC-seq	H3K27ac	ATAC	K562-H3K27ac-4#48_3	84810096	22147	3829.4	21859	20909	20213	95.654	2.44672	11156	7326	2.844	26456	3908	2.81
scNanoCT&ATAC-seq	H3K27ac	ATAC	K562-H3K27ac-4#48_4	172334864	44279	3892	43909	42781	41328	97.4311	5.14592	22787	8312	3.218	54869	2990	2.157
scNanoCT&ATAC-seq	H3K27ac	ATAC	K562-H3K27ac-4#48_5	144621236	29106	4968.8	28841	27451	26421	95.1805	4.27187	12437	8671	3.596	37181	6231	3.057
scNanoCT&ATAC-seq	H3K27ac	ATAC	K562-H3K27ac-4#48_6	19060575	4698	4057.2	3969	3836	3652	96.649	0.537047	2775	2299	7.668	3922	1076	6.205
scNanoCT&ATAC-seq	H3K27ac	ATAC	K562-H3K27ac-4#48_7	205827291	43972	4680.9	43260	41280	39476	95.423	6.04133	16892	9924	2.398	57030	6479	1.963
scNanoCT&ATAC-seq	H3K27ac	ATAC	K562-H3K27ac-4#48_8	108066010	23649	4569.6	22632	21511	20604	95.0468	3.16817	10134	6511	2.864	28746	3858	2.617
scNanoCT&ATAC-seq	H3K27ac	ATAC	K562-H3K27ac-4#48_9	283214671	58994	4800.7	58302	55679	53583	95.501	8.35571	19107	12746	2.801	81137	9889	2.285
scNanoCT&ATAC-seq	H3K27me3	ATAC	K562-H3K27me3-1#17_1	410240416	91444	4486.2	90765	86905	83395	95.7473	12.0795	62046	28342	1.796	93160	9233	4.185
scNanoCT&ATAC-seq	H3K27me3	ATAC	K562-H3K27me3-1#17_10	579438230	115179	5030.8	114589	109181	105123	95.2805	17.1696	47955	21286	1.687	149183	15336	4.262
scNanoCT&ATAC-seq	H3K27me3	ATAC	K562-H3K27me3-1#17_11	204182115	41519	4917.8	41197	39417	37769	95.6793	6.01866	21940	10379	1.846	48775	5450	4.467
scNanoCT&ATAC-seq	H3K27me3	ATAC	K562-H3K27me3-1#17_12	597998535	125584	4761.7	124617	119569	114530	95.9492	17.7785	71009	34022	1.75	143906	14516	3.869
scNanoCT&ATAC-seq	H3K27me3	ATAC	K562-H3K27me3-1#17_2	346696491	78055	4441.7	77509	74410	71219	96.0018	10.2305	49389	21467	1.502	83801	7354	3.113
scNanoCT&ATAC-seq	H3K27me3	ATAC	K562-H3K27me3-1#17_3	111488724	29087	3832.9	28799	27777	26900	96.4513	3.25181	20951	10909	2.005	28944	3364	4.813
scNanoCT&ATAC-seq	H3K27me3	ATAC	K562-H3K27me3-1#17_4	143350291	27199	5270.4	27020	26115	25293	96.6506	4.29859	25577	12976	2.198	21312	2383	5.361
scNanoCT&ATAC-seq	H3K27me3	ATAC	K562-H3K27me3-1#17_5	288616248	60379	4780.1	60051	57492	55296	95.7386	8.52631	35920	15887	1.924	67707	5841	3.959
scNanoCT&ATAC-seq	H3K27me3	ATAC	K562-H3K27me3-1#17_6	344489131	74020	4654	72142	69575	66411	96.4417	10.2582	53718	20607	1.928	70387	8124	5.354
scNanoCT&ATAC-seq	H3K27me3	ATAC	K562-H3K27me3-1#17_7	251615970	53760	4680.4	52406	50276	48201	95.9356	7.43733	38381	17971	2.465	51121	5906	4.259
scNanoCT&ATAC-seq	H3K27me3	ATAC	K562-H3K27me3-1#17_8	140298876	27502	5101.4	27202	26246	25198	96.4856	4.18502	21338	9951	2.763	25559	3920	6.283
scNanoCT&ATAC-seq	H3K27me3	ATAC	K562-H3K27me3-1#17_9	667269887	148186	4502.9	146947	141223	134754	96.1047	19.7266	100544	41719	1.75	151134	14478	3.789
scNanoCT&ATAC-seq	H3K27me3	ATAC	K562-H3K27me3-1#18_1	460383920	100286	4590.7	99537	95639	91761	96.0839	13.6189	64373	33349	2.073	107510	11703	4.339
scNanoCT&ATAC-seq	H3K27me3	ATAC	K562-H3K27me3-1#18_10	285101820	57318	4974	56722	54429	52324	95.9575	8.47158	29523	13332	1.752	68466	7417	4.792
scNanoCT&ATAC-seq	H3K27me3	ATAC	K562-H3K27me3-1#18_11	236336684	47366	4989.6	47008	45236	43435	96.2304	7.04158	29231	13505	1.921	51950	5951	4.519
scNanoCT&ATAC-seq	H3K27me3	ATAC	K562-H3K27me3-1#18_12	554476795	115754	4790.1	115051	110767	105932	96.2764	16.5351	83377	36561	2.032	114413	13513	4.906
scNanoCT&ATAC-seq	H3K27me3	ATAC	K562-H3K27me3-1#18_2	418268917	88211	4741.7	87473	83464	79929	95.4169	12.2592	49611	26569	1.734	99797	10507	3.81
scNanoCT&ATAC-seq	H3K27me3	ATAC	K562-H3K27me3-1#18_3	136379019	35441	3848.1	35074	33734	32545	96.1795	3.95451	30800	13700	1.786	30269	3036	4.317
scNanoCT&ATAC-seq	H3K27me3	ATAC	K562-H3K27me3-1#18_4	326536835	67108	4865.8	66669	64077	61890	96.1121	9.69921	41175	20184	1.914	74259	7362	4.257
scNanoCT&ATAC-seq	H3K27me3	ATAC	K562-H3K27me3-1#18_5	159489368	40846	3904.7	40657	39584	38127	97.3608	4.7193	34752	13152	1.464	37269	1974	2.462
scNanoCT&ATAC-seq	H3K27me3	ATAC	K562-H3K27me3-1#18_6	171850614	35844	4794.4	35237	33851	32402	96.0666	5.05177	25432	13038	1.843	35023	3991	5.087
scNanoCT&ATAC-seq	H3K27me3	ATAC	K562-H3K27me3-1#18_7	253086251	57495	4401.9	54734	52664	50406	96.2181	7.42612	36330	17272	1.812	58246	5814	3.943
scNanoCT&ATAC-seq	H3K27me3	ATAC	K562-H3K27me3-1#18_8	339185890	74886	4529.4	74355	71267	68009	95.847	10.0062	50873	21845	1.773	76496	7484	4.388
scNanoCT&ATAC-seq	H3K27me3	ATAC	K562-H3K27me3-1#18_9	427537260	86940	4917.6	86218	82000	78590	95.1078	12.5464	44616	22935	2.033	101951	9727	4.72
scNanoCT&ATAC-seq	H3K27me3	ATAC	K562-H3K27me3-1#19_1	332242198	70841	4690	70289	67189	64176	95.5896	9.79178	38127	20767	1.841	81642	8759	4.346
scNanoCT&ATAC-seq	H3K27me3	ATAC	K562-H3K27me3-1#19_10	346671010	69731	4971.5	69339	66324	63299	95.6518	10.2817	36834	20083	1.957	81718	9631	4.678
scNanoCT&ATAC-seq	H3K27me3	ATAC	K562-H3K27me3-1#19_11	484303462	102051	4745.7	101353	97075	92185	95.7791	14.3184	56958	30616	1.784	115641	12157	4.367
scNanoCT&ATAC-seq	H3K27me3	ATAC	K562-H3K27me3-1#19_12	288350914	64324	4482.8	63939	61174	57977	95.6756	8.48795	42688	20442	1.693	66379	6769	3.668
scNanoCT&ATAC-seq	H3K27me3	ATAC	K562-H3K27me3-1#19_2	41481116	6844	6060.9	6671	6175	5969	92.5648	1.18288	3517	1324	1.518	8460	741	3.787
scNanoCT&ATAC-seq	H3K27me3	ATAC	K562-H3K27me3-1#19_3	143498698	38151	3761.3	37841	36195	34625	95.6502	4.15254	26205	13051	1.595	38444	3669	3.422
scNanoCT&ATAC-seq	H3K27me3	ATAC	K562-H3K27me3-1#19_4	174131618	36949	4712.8	36752	35391	33901	96.2968	5.1775	26036	12997	1.655	37415	4310	4.261
scNanoCT&ATAC-seq	H3K27me3	ATAC	K562-H3K27me3-1#19_5	290837743	57426	5064.6	57102	54597	52285	95.6131	8.63717	32199	15410	1.848	65789	6879	5.16
scNanoCT&ATAC-seq	H3K27me3	ATAC	K562-H3K27me3-1#19_6	335369501	75666	4432.2	73534	70266	66538	95.5558	9.83884	47650	21895	2.144	77176	8111	4.685
scNanoCT&ATAC-seq	H3K27me3	ATAC	K562-H3K27me3-1#19_7	80620658	17219	4682.1	15258	14549	13993	95.3533	2.30256	5997	3419	2.122	19546	2447	6.039
scNanoCT&ATAC-seq	H3K27me3	ATAC	K562-H3K27me3-1#19_8	193944294	38070	5094.4	36827	34817	33434	94.542	5.67509	10716	5571	1.86	51765	5158	4.16
scNanoCT&ATAC-seq	H3K27me3	ATAC	K562-H3K27me3-1#19_9	412555852	87256	4728.1	85206	81858	77674	96.0707	12.2489	53837	26457	1.859	91257	10911	4.702
scNanoCT&ATAC-seq	H3K27me3	ATAC	K562-H3K27me3-1#20_1	179431725	38033	4717.8	37512	35629	34014	94.9803	5.25335	35007	15437	2.075	27460	3931	5.498
scNanoCT&ATAC-seq	H3K27me3	ATAC	K562-H3K27me3-1#20_10	325872034	62536	5211	62224	59657	57103	95.8746	9.73639	28731	15254	1.55	78532	9245	4.316
scNanoCT&ATAC-seq	H3K27me3	ATAC	K562-H3K27me3-1#20_11	141068144	26510	5321.3	26297	25603	24627	97.3609	4.27252	26076	12443	2.271	19967	3213	6.625
scNanoCT&ATAC-seq	H3K27me3	ATAC	K562-H3K27me3-1#20_12	316697862	66980	4728.2	66603	64127	61391	96.2824	9.43755	44994	17787	1.953	70469	5767	3.969
scNanoCT&ATAC-seq	H3K27me3	ATAC	K562-H3K27me3-1#20_2	471449155	97340	4843.3	96743	92413	88171	95.5242	13.9377	49998	27640	1.723	115144	11771	3.692
scNanoCT&ATAC-seq	H3K27me3	ATAC	K562-H3K27me3-1#20_3	127160941	27969	4546.5	27729	26288	25563	94.8033	3.69967	7279	3808	2.633	40138	4103	4.864
scNanoCT&ATAC-seq	H3K27me3	ATAC	K562-H3K27me3-1#20_4	311244987	62164	5006.8	61805	59363	56935	96.0489	9.29888	36445	15527	1.963	69764	8263	4.87
scNanoCT&ATAC-seq	H3K27me3	ATAC	K562-H3K27me3-1#20_5	118677316	23113	5134.7	22947	22293	21450	97.15	3.57099	16259	7314	1.947	24036	2506	5.395
scNanoCT&ATAC-seq	H3K27me3	ATAC	K562-H3K27me3-1#20_6	345333832	72892	4737.6	70669	67897	64563	96.0775	10.2502	51097	26489	1.804	69950	9662	5.322
scNanoCT&ATAC-seq	H3K27me3	ATAC	K562-H3K27me3-1#20_7	284610051	58810	4839.5	58199	56489	53884	97.0618	8.54231	54715	25184	2.407	45423	7013	5.628
scNanoCT&ATAC-seq	H3K27me3	ATAC	K562-H3K27me3-1#20_8	389234427	83258	4675	82492	79402	75710	96.2542	11.5957	54290	28515	1.926	87596	10435	4.806
scNanoCT&ATAC-seq	H3K27me3	ATAC	K562-H3K27me3-1#20_9	445935585	91867	4854.1	90783	87176	83163	96.0268	13.249	51457	24189	1.734	103993	10359	4.634
scNanoCT&ATAC-seq	H3K27me3	ATAC	K562-H3K27me3-1#21_1	375216636	79515	4718.8	78963	75674	72704	95.8348	11.0765	43438	22222	1.938	92481	9161	4.066
scNanoCT&ATAC-seq	H3K27me3	ATAC	K562-H3K27me3-1#21_10	80585500	14467	5570.3	14320	13656	13183	95.3631	2.37628	4145	2101	1.856	20532	2996	5.736
scNanoCT&ATAC-seq	H3K27me3	ATAC	K562-H3K27me3-1#21_11	538069391	110333	4876.8	109589	104624	99958	95.4694	15.9097	55937	25388	2.114	130460	11840	4.203
scNanoCT&ATAC-seq	H3K27me3	ATAC	K562-H3K27me3-1#21_12	362319258	76032	4765.4	75588	72307	69116	95.6594	10.7097	38933	18016	1.874	91022	8705	4.128
scNanoCT&ATAC-seq	H3K27me3	ATAC	K562-H3K27me3-1#21_2	185175696	38403	4821.9	38011	36669	35006	96.4694	5.48912	33165	13833	2.046	32086	3261	4.299
scNanoCT&ATAC-seq	H3K27me3	ATAC	K562-H3K27me3-1#21_3	222969733	57063	3907.4	56628	54250	52002	95.8007	6.46594	36562	16356	1.835	60348	5282	3.61
scNanoCT&ATAC-seq	H3K27me3	ATAC	K562-H3K27me3-1#21_4	206430416	43385	4758.1	43120	41695	39986	96.6953	6.16747	34069	16322	2.107	41132	3939	3.93
scNanoCT&ATAC-seq	H3K27me3	ATAC	K562-H3K27me3-1#21_5	404708763	90555	4469.2	90093	86319	82096	95.811	11.9218	70857	24752	1.598	83459	6518	3.005
scNanoCT&ATAC-seq	H3K27me3	ATAC	K562-H3K27me3-1#21_6	345771225	75721	4566.4	70463	67251	64144	95.4416	10.1386	40719	19082	2.138	79190	8569	4.26
scNanoCT&ATAC-seq	H3K27me3	ATAC	K562-H3K27me3-1#21_7	340333124	71741	4743.9	68615	65625	62621	95.6424	10.0001	39899	21779	1.826	76478	9522	5.163
scNanoCT&ATAC-seq	H3K27me3	ATAC	K562-H3K27me3-1#21_8	311647340	67428	4621.9	66605	63972	60973	96.0468	9.20809	45747	18739	1.855	68532	6100	3.982
scNanoCT&ATAC-seq	H3K27me3	ATAC	K562-H3K27me3-1#21_9	436552898	95806	4556.6	91827	87990	83689	95.8215	12.8421	72301	31913	1.598	84226	8877	3.642
scNanoCT&ATAC-seq	H3K27me3	ATAC	K562-H3K27me3-1#22_1	309890681	64249	4823.3	63680	60692	58345	95.3078	9.10145	34274	18486	2.128	74563	8538	4.36
scNanoCT&ATAC-seq	H3K27me3	ATAC	K562-H3K27me3-1#22_10	269114249	57493	4680.8	57122	54645	52324	95.6637	7.91783	32323	12707	1.56	66031	5385	3.629
scNanoCT&ATAC-seq	H3K27me3	ATAC	K562-H3K27me3-1#22_11	133077304	23951	5556.2	23662	22491	21702	95.0511	3.91282	7011	3624	2.417	33411	4611	5.591
scNanoCT&ATAC-seq	H3K27me3	ATAC	K562-H3K27me3-1#22_12	429009922	90687	4730.7	90101	86417	82562	95.9113	12.6968	55033	26615	2.046	99929	11128	3.905
scNanoCT&ATAC-seq	H3K27me3	ATAC	K562-H3K27me3-1#22_2	185082380	41807	4427.1	41223	39452	37903	95.7039	5.40103	22642	7402	1.736	49125	1817	4.477
scNanoCT&ATAC-seq	H3K27me3	ATAC	K562-H3K27me3-1#22_3	137856393	35073	3930.6	34759	33361	32076	95.978	4.01464	25611	11826	1.927	34079	3470	4.033
scNanoCT&ATAC-seq	H3K27me3	ATAC	K562-H3K27me3-1#22_4	175094371	31738	5516.9	31498	29755	28990	94.4663	5.1237	7673	4263	1.98	46016	5544	5.106
scNanoCT&ATAC-seq	H3K27me3	ATAC	K562-H3K27me3-1#22_5	735895903	153991	4778.8	153224	146745	140609	95.7716	21.821	101977	45201	1.689	161629	15561	4.23
scNanoCT&ATAC-seq	H3K27me3	ATAC	K562-H3K27me3-1#22_6	274937555	77910	3528.9	52562	49389	47332	93.9633	7.71088	29392	14554	1.727	58973	7021	5.151
scNanoCT&ATAC-seq	H3K27me3	ATAC	K562-H3K27me3-1#22_7	263198962	61703	4265.6	54164	51991	49676	95.9881	7.68418	35327	15114	1.999	56751	6544	5.409
scNanoCT&ATAC-seq	H3K27me3	ATAC	K562-H3K27me3-1#22_8	102050243	24492	4166.7	19774	18988	18234	96.0251	2.98151	15551	7677	2.743	18598	2742	5.613
scNanoCT&ATAC-seq	H3K27me3	ATAC	K562-H3K27me3-1#22_9	358762794	79803	4495.6	77988	74822	71308	95.9404	10.5267	45025	20518	1.61	88053	7492	3.642
scNanoCT&ATAC-seq	H3K27me3	ATAC	K562-H3K27me3-1#23_1	387280138	82231	4709.7	81531	78129	74861	95.8274	11.4438	48521	25395	1.989	91101	10002	4.15
scNanoCT&ATAC-seq	H3K27me3	ATAC	K562-H3K27me3-1#23_10	384381201	76591	5018.6	76005	72159	69145	94.9398	11.3018	38313	19169	1.903	91026	9989	4.497
scNanoCT&ATAC-seq	H3K27me3	ATAC	K562-H3K27me3-1#23_11	392163786	85120	4607.2	84087	80804	77055	96.0957	11.6279	49171	21561	1.906	95121	8768	3.608
scNanoCT&ATAC-seq	H3K27me3	ATAC	K562-H3K27me3-1#23_12	423488194	85988	4925	85435	81920	78578	95.8858	12.5799	42927	20888	1.803	104082	9900	4.341
scNanoCT&ATAC-seq	H3K27me3	ATAC	K562-H3K27me3-1#23_2	442190223	89820	4923.1	89069	85154	81512	95.6045	13.0351	46606	24719	1.706	105215	11437	4.237
scNanoCT&ATAC-seq	H3K27me3	ATAC	K562-H3K27me3-1#23_3	174288014	43827	3976.7	43398	41605	40003	95.8685	5.04961	31235	14493	2.046	42546	3996	3.95
scNanoCT&ATAC-seq	H3K27me3	ATAC	K562-H3K27me3-1#23_4	362963997	74741	4856.3	74313	71224	68584	95.8433	10.7653	48374	21275	1.877	79617	6724	3.649
scNanoCT&ATAC-seq	H3K27me3	ATAC	K562-H3K27me3-1#23_5	332219020	66552	4991.9	66130	63928	61310	96.6702	9.97009	44235	19109	1.941	70568	8013	4.575
scNanoCT&ATAC-seq	H3K27me3	ATAC	K562-H3K27me3-1#23_6	361417695	81704	4423.5	78115	74960	71355	95.9611	10.6244	48228	20276	1.513	85497	7600	3.801
scNanoCT&ATAC-seq	H3K27me3	ATAC	K562-H3K27me3-1#23_7	298283963	64669	4612.5	61622	59398	56763	96.3909	8.8238	44030	18419	2.163	61635	6412	4.824
scNanoCT&ATAC-seq	H3K27me3	ATAC	K562-H3K27me3-1#23_8	387497630	85815	4515.5	81459	77886	74361	95.6137	11.4075	45876	18506	1.935	93397	8287	3.871
scNanoCT&ATAC-seq	H3K27me3	ATAC	K562-H3K27me3-1#23_9	537501043	123280	4360	116655	111858	106706	95.8879	15.7947	70706	33750	1.937	129010	11483	3.885
scNanoCT&ATAC-seq	H3K27me3	ATAC	K562-H3K27me3-1#24_10	85952101	16925	5078.4	16723	16175	15545	96.7231	2.55985	14121	7526	2.095	14991	1993	5.236
scNanoCT&ATAC-seq	H3K27me3	ATAC	K562-H3K27me3-1#24_11	283817660	62592	4534.4	62124	59522	56719	95.8116	8.37899	39554	18504	1.83	66618	6487	4.045
scNanoCT&ATAC-seq	H3K27me3	ATAC	K562-H3K27me3-1#24_12	397947077	106914	3722.1	106343	101843	97400	95.7684	11.6361	84209	27990	2.078	99675	5846	3.728
scNanoCT&ATAC-seq	H3K27me3	ATAC	K562-H3K27me3-1#24_2	319153949	67972	4695.4	67414	64928	62239	96.3123	9.46993	38264	15902	2.402	78172	7254	4.521
scNanoCT&ATAC-seq	H3K27me3	ATAC	K562-H3K27me3-1#24_3	170236409	45274	3760.1	44945	43058	41556	95.8015	4.9412	29042	12384	1.22	48647	4189	3.599
scNanoCT&ATAC-seq	H3K27me3	ATAC	K562-H3K27me3-1#24_4	157776558	33719	4679.2	33517	32381	31137	96.6107	4.69181	24326	11870	2.107	34057	3687	3.983
scNanoCT&ATAC-seq	H3K27me3	ATAC	K562-H3K27me3-1#24_5	272088780	58028	4688.9	57698	55661	53357	96.4695	8.10921	40215	16035	1.943	60074	6078	4.208
scNanoCT&ATAC-seq	H3K27me3	ATAC	K562-H3K27me3-1#24_6	205865637	44352	4641.6	43884	42341	40425	96.4839	6.09652	29356	13812	1.628	46274	4588	4.038
scNanoCT&ATAC-seq	H3K27me3	ATAC	K562-H3K27me3-1#24_7	285406743	66669	4281	65825	63252	60336	96.0912	8.36987	43662	19775	1.658	68992	6451	3.706
scNanoCT&ATAC-seq	H3K27me3	ATAC	K562-H3K27me3-1#24_8	269904128	58536	4610.9	53974	51727	49688	95.8369	7.96074	34189	16420	1.498	58850	7727	4.425
scNanoCT&ATAC-seq	H3K27me3	ATAC	K562-H3K27me3-1#24_9	212598032	51436	4133.3	47450	45209	43229	95.2771	6.17076	38138	18858	1.61	43437	1873	2.561
scNanoCT&ATAC-seq	H3K27me3	ATAC	K562-H3K27me3-2#25_1	447349271	129104	3465	128213	124731	119229	97.2842	13.1507	104974	29238	1.926	119672	4426	2.688
scNanoCT&ATAC-seq	H3K27me3	ATAC	K562-H3K27me3-2#25_10	323630162	63875	5066.6	63366	61055	58556	96.3529	9.68306	40214	21825	1.803	69025	7937	4.954
scNanoCT&ATAC-seq	H3K27me3	ATAC	K562-H3K27me3-2#25_11	434089041	87367	4968.6	86756	83083	79102	95.7663	12.8893	53460	25974	1.844	94516	10288	4.748
scNanoCT&ATAC-seq	H3K27me3	ATAC	K562-H3K27me3-2#25_12	324715886	68593	4734	65854	63422	60496	96.307	9.66094	47363	22656	2.258	65919	7872	5.143
scNanoCT&ATAC-seq	H3K27me3	ATAC	K562-H3K27me3-2#25_2	398115894	88370	4505.1	87324	84468	80011	96.7294	11.8423	71073	25201	1.753	78941	6285	3.709
scNanoCT&ATAC-seq	H3K27me3	ATAC	K562-H3K27me3-2#25_3	30662402	7248	4230.5	7100	6810	6618	95.9155	0.873161	4528	2402	2.049	7493	826	3.765
scNanoCT&ATAC-seq	H3K27me3	ATAC	K562-H3K27me3-2#25_4	337652138	70212	4809	69775	66830	63996	95.7793	9.97354	45692	18727	1.796	74038	6031	3.735
scNanoCT&ATAC-seq	H3K27me3	ATAC	K562-H3K27me3-2#25_5	329358326	66483	4954	66096	63274	60538	95.7305	9.81102	47621	23536	1.896	65812	7238	4.539
scNanoCT&ATAC-seq	H3K27me3	ATAC	K562-H3K27me3-2#25_6	360989133	77625	4650.4	73939	70644	67425	95.5436	10.6408	41184	19686	2.124	85158	8808	4.671
scNanoCT&ATAC-seq	H3K27me3	ATAC	K562-H3K27me3-2#25_7	48547098	13970	3475.1	10952	10493	10229	95.809	1.32045	5089	2592	1.909	13421	1606	4.574
scNanoCT&ATAC-seq	H3K27me3	ATAC	K562-H3K27me3-2#25_8	136495690	42844	3185.9	23233	21760	20967	93.6599	3.74854	7399	4044	2.635	31786	3995	4.642
scNanoCT&ATAC-seq	H3K27me3	ATAC	K562-H3K27me3-2#25_9	117184935	26693	4390.1	21209	20266	19511	95.5538	3.38432	7086	3913	1.926	29197	3541	4.289
scNanoCT&ATAC-seq	H3K27me3	ATAC	K562-H3K27me3-2#26_1	374846551	77888	4812.6	77188	74058	71329	95.945	11.0862	45599	22385	1.779	86746	8667	4.255
scNanoCT&ATAC-seq	H3K27me3	ATAC	K562-H3K27me3-2#26_10	245662997	51479	4772.1	51097	48777	46924	95.4596	7.23892	31829	14691	1.628	56038	5118	4.53
scNanoCT&ATAC-seq	H3K27me3	ATAC	K562-H3K27me3-2#26_11	266460641	57728	4615.8	57298	55078	52691	96.1255	7.8994	38657	16614	1.78	60023	5819	3.959
scNanoCT&ATAC-seq	H3K27me3	ATAC	K562-H3K27me3-2#26_12	70562443	15070	4682.3	13437	12881	12457	95.8622	2.07991	5989	3218	2.683	17214	2346	5.086
scNanoCT&ATAC-seq	H3K27me3	ATAC	K562-H3K27me3-2#26_2	274180183	60272	4549	59009	56572	53976	95.8701	8.07335	41566	17543	1.53	59407	5259	4.582
scNanoCT&ATAC-seq	H3K27me3	ATAC	K562-H3K27me3-2#26_3	184729395	50340	3669.6	49915	48148	46451	96.46	5.38763	35053	14554	1.398	51789	4146	3.011
scNanoCT&ATAC-seq	H3K27me3	ATAC	K562-H3K27me3-2#26_4	293875383	57959	5070.4	57569	55134	53326	95.7703	8.75027	34732	14959	1.915	64515	6505	4.362
scNanoCT&ATAC-seq	H3K27me3	ATAC	K562-H3K27me3-2#26_5	238114542	47856	4975.6	47195	45346	43578	96.0822	7.09276	38701	15353	2.332	42791	5342	5.69
scNanoCT&ATAC-seq	H3K27me3	ATAC	K562-H3K27me3-2#26_6	226955780	86045	2637.6	45053	41380	39718	91.8474	6.09226	31613	14754	2.622	42329	5352	5.943
scNanoCT&ATAC-seq	H3K27me3	ATAC	K562-H3K27me3-2#26_7	226091486	71026	3183.2	57026	53999	52029	94.6919	6.37276	34909	15195	1.486	62204	5168	3.987
scNanoCT&ATAC-seq	H3K27me3	ATAC	K562-H3K27me3-2#26_8	278715765	152178	1831.5	112468	73725	71014	65.552	7.088	56722	16082	1.849	77341	2102	2.762
scNanoCT&ATAC-seq	H3K27me3	ATAC	K562-H3K27me3-2#26_9	378232943	79985	4728.8	79086	75879	72661	95.9449	11.1774	46570	17725	1.977	89273	7771	3.716
scNanoCT&ATAC-seq	H3K27me3	ATAC	K562-H3K27me3-2#27_1	213852728	49432	4326.2	48694	47187	45247	96.9052	6.35281	39644	16297	1.731	45173	3587	3.187
scNanoCT&ATAC-seq	H3K27me3	ATAC	K562-H3K27me3-2#27_10	319817637	70350	4546.1	69911	67051	64198	95.9091	9.46807	42033	19091	1.692	78634	7280	3.885
scNanoCT&ATAC-seq	H3K27me3	ATAC	K562-H3K27me3-2#27_11	260386473	62347	4176.4	61915	59592	56938	96.2481	7.67013	39413	17463	2.151	67656	6357	3.227
scNanoCT&ATAC-seq	H3K27me3	ATAC	K562-H3K27me3-2#27_12	339309433	99303	3416.9	97553	95071	90779	97.4557	10.0191	71644	25309	1.689	100489	5387	2.626
scNanoCT&ATAC-seq	H3K27me3	ATAC	K562-H3K27me3-2#27_2	413513100	87380	4732.4	85964	82589	78733	96.0739	12.2621	56097	26693	1.71	90832	9450	4.462
scNanoCT&ATAC-seq	H3K27me3	ATAC	K562-H3K27me3-2#27_3	411699754	103718	3969.4	103057	99064	95216	96.1254	12.0975	70496	29122	1.767	107306	8789	3.729
scNanoCT&ATAC-seq	H3K27me3	ATAC	K562-H3K27me3-2#27_4	105514086	20958	5034.5	20815	20149	19387	96.8004	3.16257	14137	7967	2.441	21956	2839	5.351
scNanoCT&ATAC-seq	H3K27me3	ATAC	K562-H3K27me3-2#27_5	283253520	56016	5056.7	55676	53573	51524	96.2228	8.46351	34141	16198	2.534	62170	7534	4.929
scNanoCT&ATAC-seq	H3K27me3	ATAC	K562-H3K27me3-2#27_6	155650467	64088	2428.7	33779	31308	29836	92.6848	4.08207	25065	13306	1.582	30670	2951	3.883
scNanoCT&ATAC-seq	H3K27me3	ATAC	K562-H3K27me3-2#27_7	438432745	105053	4173.4	97807	93767	89267	95.8694	12.8526	73411	30992	1.841	92960	8715	4.67
scNanoCT&ATAC-seq	H3K27me3	ATAC	K562-H3K27me3-2#27_8	228626033	56813	4024.2	47479	45621	43639	96.0867	6.7	36189	15829	2.519	45047	5923	5.153
scNanoCT&ATAC-seq	H3K27me3	ATAC	K562-H3K27me3-2#27_9	315671228	86040	3668.9	72419	68875	65541	95.1063	9.15506	63634	25342	1.817	58831	5101	3.223
scNanoCT&ATAC-seq	H3K27me3	ATAC	K562-H3K27me3-2#28_1	312143115	68446	4560.4	67778	65334	62161	96.3941	9.25679	51057	21045	1.704	65072	6201	3.652
scNanoCT&ATAC-seq	H3K27me3	ATAC	K562-H3K27me3-2#28_10	240016043	50745	4729.8	50393	48008	45884	95.2672	7.05504	36252	17672	1.902	49612	5331	4.73
scNanoCT&ATAC-seq	H3K27me3	ATAC	K562-H3K27me3-2#28_11	272366823	72596	3751.8	60146	57668	54673	95.88	7.9033	52677	19478	1.968	49625	4124	3.624
scNanoCT&ATAC-seq	H3K27me3	ATAC	K562-H3K27me3-2#28_12	425974825	88765	4798.9	87588	83264	79288	95.0633	12.5593	49428	21431	1.952	99252	9195	4.214
scNanoCT&ATAC-seq	H3K27me3	ATAC	K562-H3K27me3-2#28_2	455978390	94282	4836.3	93477	89165	84803	95.3871	13.4457	54130	24825	1.852	104332	9739	3.721
scNanoCT&ATAC-seq	H3K27me3	ATAC	K562-H3K27me3-2#28_3	318162292	73687	4317.8	73147	69791	66808	95.412	9.3175	46348	21597	1.568	78178	6905	4.528
scNanoCT&ATAC-seq	H3K27me3	ATAC	K562-H3K27me3-2#28_4	371396559	76414	4860.3	75951	72791	69741	95.8394	11.0464	49874	26608	1.579	80214	8026	4.106
scNanoCT&ATAC-seq	H3K27me3	ATAC	K562-H3K27me3-2#28_5	346028659	67655	5114.6	67233	64582	61821	96.057	10.3286	38217	17677	1.898	77442	8333	4.203
scNanoCT&ATAC-seq	H3K27me3	ATAC	K562-H3K27me3-2#28_6	85285797	27466	3105.1	16627	15638	14923	94.0518	2.34655	10433	4710	1.573	18829	1746	3.921
scNanoCT&ATAC-seq	H3K27me3	ATAC	K562-H3K27me3-2#28_7	250401433	76691	3265.1	52648	50297	47866	95.5345	7.02375	40287	17929	2.064	49097	3961	4.255
scNanoCT&ATAC-seq	H3K27me3	ATAC	K562-H3K27me3-2#28_8	362280264	83363	4345.8	79042	75646	71944	95.7036	10.6499	46793	21069	1.922	87882	7057	3.642
scNanoCT&ATAC-seq	H3K27me3	ATAC	K562-H3K27me3-2#29_1	176082812	34808	5058.7	34402	33448	32053	97.2269	5.30493	17996	7854	2.3	41946	4714	4.39
scNanoCT&ATAC-seq	H3K27me3	ATAC	K562-H3K27me3-2#29_10	71778162	13407	5353.8	13179	12603	12135	95.6294	2.12024	7413	3751	3.512	15206	1529	6.42
scNanoCT&ATAC-seq	H3K27me3	ATAC	K562-H3K27me3-2#29_11	386956924	78700	4916.9	78018	74720	71463	95.7728	11.4757	41471	21463	1.806	92164	9731	4.262
scNanoCT&ATAC-seq	H3K27me3	ATAC	K562-H3K27me3-2#29_12	122288527	24941	4903.1	24523	23753	22709	96.8601	3.66747	20415	9817	2.068	22085	3391	5.564
scNanoCT&ATAC-seq	H3K27me3	ATAC	K562-H3K27me3-2#29_2	204449104	42699	4788.1	42224	40541	38642	96.0141	6.05639	28264	14315	1.84	43965	4385	4.092
scNanoCT&ATAC-seq	H3K27me3	ATAC	K562-H3K27me3-2#29_3	421770502	102701	4106.8	101958	98514	94414	96.6221	12.4906	72186	25903	1.973	104056	8515	3.683
scNanoCT&ATAC-seq	H3K27me3	ATAC	K562-H3K27me3-2#29_4	301370355	57651	5227.5	57288	54646	52561	95.3882	8.94757	38870	18951	1.933	59545	7979	5.189
scNanoCT&ATAC-seq	H3K27me3	ATAC	K562-H3K27me3-2#29_5	165391942	35575	4649.1	35355	33660	32339	95.2058	4.86007	22797	7945	1.933	37946	3098	3.824
scNanoCT&ATAC-seq	H3K27me3	ATAC	K562-H3K27me3-2#29_6	272069321	77787	3497.6	49998	46996	45007	93.9958	7.66291	18967	8824	2.043	65271	7237	5.05
scNanoCT&ATAC-seq	H3K27me3	ATAC	K562-H3K27me3-2#29_7	148987004	40699	3660.7	28931	27414	26388	94.7565	4.24209	17900	9583	2.238	31117	3135	6.47
scNanoCT&ATAC-seq	H3K27me3	ATAC	K562-H3K27me3-2#29_8	253746419	74777	3393.4	53109	50786	48329	95.626	7.2469	39455	17296	2.223	51093	5494	4.454
scNanoCT&ATAC-seq	H3K27me3	ATAC	K562-H3K27me3-2#29_9	452486454	96591	4684.6	88295	85015	81182	96.2852	13.4346	52160	24543	2.04	99489	8790	4.627
scNanoCT&ATAC-seq	H3K27me3	ATAC	K562-H3K27me3-2#30_1	550387635	115573	4762.3	114548	109362	104775	95.4726	16.2316	56921	29081	1.424	138465	12954	3.491
scNanoCT&ATAC-seq	H3K27me3	ATAC	K562-H3K27me3-2#30_10	450639243	89906	5012.3	89368	85225	81388	95.3641	13.3389	53918	24273	1.893	98646	9779	4.769
scNanoCT&ATAC-seq	H3K27me3	ATAC	K562-H3K27me3-2#30_11	416796678	89046	4680.7	88365	84147	80004	95.2266	12.2795	57432	23681	1.706	92340	8623	4.509
scNanoCT&ATAC-seq	H3K27me3	ATAC	K562-H3K27me3-2#30_12	455511103	105791	4305.8	101216	97861	93137	96.6853	13.5467	67718	24577	1.851	107651	7829	3.323
scNanoCT&ATAC-seq	H3K27me3	ATAC	K562-H3K27me3-2#30_2	201517688	44195	4559.7	39848	37644	35957	94.469	5.80968	22720	7926	1.815	44362	3673	5.122
scNanoCT&ATAC-seq	H3K27me3	ATAC	K562-H3K27me3-2#30_3	142876316	35875	3982.6	35467	33867	32507	95.4888	4.13016	29974	15081	1.626	30503	1734	3.326
scNanoCT&ATAC-seq	H3K27me3	ATAC	K562-H3K27me3-2#30_4	337096513	67402	5001.3	67004	63998	61488	95.5137	9.99295	36849	14931	1.868	78064	7088	3.904
scNanoCT&ATAC-seq	H3K27me3	ATAC	K562-H3K27me3-2#30_5	414158471	88804	4663.7	88283	84899	80863	96.1669	12.3078	59818	24391	2.108	91942	7400	4.249
scNanoCT&ATAC-seq	H3K27me3	ATAC	K562-H3K27me3-2#30_6	360796310	104176	3463.3	76336	71508	67870	93.6753	10.1731	46341	21497	1.906	80462	6917	3.817
scNanoCT&ATAC-seq	H3K27me3	ATAC	K562-H3K27me3-2#30_7	431209225	103771	4155.4	86027	82326	78350	95.6979	12.5553	47412	22008	1.738	98340	9903	4.14
scNanoCT&ATAC-seq	H3K27me3	ATAC	K562-H3K27me3-2#30_8	355213439	90288	3934.2	74229	70713	67357	95.2633	10.2483	43817	20202	1.753	82083	7750	4.114
scNanoCT&ATAC-seq	H3K27me3	ATAC	K562-H3K27me3-2#30_9	380487974	84617	4496.6	81927	78558	74637	95.8878	11.1991	50816	21656	1.476	88795	7952	3.703
scNanoCT&ATAC-seq	H3K27me3	ATAC	K562-H3K27me3-2#31_1	347237492	80310	4323.7	79353	76231	72527	96.0657	10.2225	56036	22847	1.777	79670	6936	3.616
scNanoCT&ATAC-seq	H3K27me3	ATAC	K562-H3K27me3-2#31_10	285183092	61405	4644.3	60944	57877	55207	94.9675	8.35703	33912	17141	2.037	69759	6567	4.181
scNanoCT&ATAC-seq	H3K27me3	ATAC	K562-H3K27me3-2#31_11	29148312	10222	2851.5	10108	9804	9408	96.9925	0.810822	9188	4487	1.862	8686	1024	3.896
scNanoCT&ATAC-seq	H3K27me3	ATAC	K562-H3K27me3-2#31_12	406625044	88068	4617.2	83141	79902	76126	96.1042	12.0514	48551	23307	1.668	94150	10747	4.358
scNanoCT&ATAC-seq	H3K27me3	ATAC	K562-H3K27me3-2#31_2	393231425	76738	5124.3	75866	72572	69224	95.6581	11.6366	38362	20344	2.052	90512	10034	4.591
scNanoCT&ATAC-seq	H3K27me3	ATAC	K562-H3K27me3-2#31_3	30273349	6549	4622.6	6433	6148	6015	95.5697	0.856599	2522	1287	1.803	8221	1410	5.114
scNanoCT&ATAC-seq	H3K27me3	ATAC	K562-H3K27me3-2#31_4	308427433	62473	4937	62098	59548	57167	95.8936	9.17066	38230	16539	1.867	69160	6334	3.899
scNanoCT&ATAC-seq	H3K27me3	ATAC	K562-H3K27me3-2#31_5	177215443	34442	5145.3	34183	32969	31458	96.4485	5.3008	36986	15208	2.12	21711	2979	5.66
scNanoCT&ATAC-seq	H3K27me3	ATAC	K562-H3K27me3-2#31_6	215039940	57486	3740.7	45548	42038	39849	92.2938	6.15289	34281	15116	1.911	40413	3939	3.446
scNanoCT&ATAC-seq	H3K27me3	ATAC	K562-H3K27me3-2#31_7	540075303	120002	4500.6	114237	109779	104022	96.0976	15.9196	69540	35433	1.8	124754	12925	4.258
scNanoCT&ATAC-seq	H3K27me3	ATAC	K562-H3K27me3-2#31_8	482627757	101602	4750.2	100788	96613	91848	95.8576	14.2973	53116	21068	1.848	119141	10281	3.952
scNanoCT&ATAC-seq	H3K27me3	ATAC	K562-H3K27me3-2#31_9	95726622	23838	4015.7	17854	16990	16254	95.1607	2.72723	9834	5541	1.696	20137	2731	5.341
scNanoCT&ATAC-seq	H3K27me3	ATAC	K562-H3K27me3-2#32_1	173024273	36834	4697.4	36170	34718	33431	95.9856	5.10569	21527	10516	2.08	40957	4384	4.145
scNanoCT&ATAC-seq	H3K27me3	ATAC	K562-H3K27me3-2#32_10	466780531	102363	4560.1	97295	93250	89490	95.8425	13.7933	68503	30291	2.027	99537	10003	3.914
scNanoCT&ATAC-seq	H3K27me3	ATAC	K562-H3K27me3-2#32_11	98442529	17509	5622.4	17346	16433	15954	94.7365	2.89249	3611	1567	3.256	25875	1262	6.222
scNanoCT&ATAC-seq	H3K27me3	ATAC	K562-H3K27me3-2#32_12	74484631	21494	3465.4	13308	12012	11700	90.2615	2.00401	3447	1257	3.96	18129	963	6.889
scNanoCT&ATAC-seq	H3K27me3	ATAC	K562-H3K27me3-2#32_2	267511074	52803	5066.2	52383	50205	48109	95.8422	7.93075	30028	14452	2.271	59794	6208	4.607
scNanoCT&ATAC-seq	H3K27me3	ATAC	K562-H3K27me3-2#32_3	157682951	37461	4209.3	37132	35650	34419	96.0088	4.62641	22419	9562	1.98	41525	3686	3.535
scNanoCT&ATAC-seq	H3K27me3	ATAC	K562-H3K27me3-2#32_4	208088817	41707	4989.3	41460	39850	38394	96.1167	6.19334	26621	12626	2.239	44944	4293	4.625
scNanoCT&ATAC-seq	H3K27me3	ATAC	K562-H3K27me3-2#32_5	600988098	118396	5076.1	117743	112600	108243	95.632	17.8895	68184	30234	1.994	134417	14364	4.82
scNanoCT&ATAC-seq	H3K27me3	ATAC	K562-H3K27me3-2#32_6	317135408	117232	2705.2	68109	63193	60576	92.7822	8.5169	38046	15422	1.483	75301	6382	3.628
scNanoCT&ATAC-seq	H3K27me3	ATAC	K562-H3K27me3-2#32_7	432864810	95828	4517.1	87006	83364	79686	95.8141	12.7126	50673	25372	1.723	97799	9402	4.626
scNanoCT&ATAC-seq	H3K27me3	ATAC	K562-H3K27me3-2#32_8	457964248	103377	4430	93181	89329	85332	95.8661	13.5171	55304	25699	1.9	104145	10181	4.063
scNanoCT&ATAC-seq	H3K27me3	ATAC	K562-H3K27me3-2#32_9	163366014	40968	3987.6	32499	31109	29865	95.7229	4.72775	20903	10068	1.311	34808	3881	4.832
scNanoCT&ATAC-seq	H3K27me3	ATAC	K562-H3K27me3-3#17_10	230146937	48745	4721.4	48176	46428	44643	96.3716	6.90277	36403	14918	2.01	47553	4241	4.348
scNanoCT&ATAC-seq	H3K27me3	ATAC	K562-H3K27me3-3#17_11	259395089	59780	4339.2	59229	56532	54183	95.4465	7.65897	46513	17739	1.828	55309	5167	3.53
scNanoCT&ATAC-seq	H3K27me3	ATAC	K562-H3K27me3-3#17_4	230832789	46801	4932.2	46385	44410	42958	95.7422	6.86565	28082	10571	1.906	52040	5181	4.306
scNanoCT&ATAC-seq	H3K27me3	ATAC	K562-H3K27me3-3#17_5	41304309	12013	3438.3	11926	11455	11307	96.0506	1.18987	7672	3449	1.71	13719	1327	3.577
[truncated: 907 more rows]

## Sheet: scNanoSeq-CUT&Tag
Table S2. Quality control of scNanoSeq-CUT&Tag data of individual cells of human cell line GM12878.
Technique	Modality	Cell ID	Data size (bp)	Barcoded reads	Avg. read length (bp)	Reads with adapters	Mapped reads	Unique reads	Mapping ratio (%)	Coverage	I5 fragments	I5 FRIP	I5 TSS
scNanoSeq-CUT&Tag	H3K27ac	H3K27ac-1#1_1	38458166	7481	5140.8	7281	7201	5849	98.9012	1.15807	10894	3857	2.826
scNanoSeq-CUT&Tag	H3K27ac	H3K27ac-1#1_10	145076333	24395	5947	24218	24001	18854	99.104	4.52808	35647	12101	4.901
scNanoSeq-CUT&Tag	H3K27ac	H3K27ac-1#1_11	67579980	11695	5778.5	11593	11478	8993	99.008	2.09945	16989	7227	5.358
scNanoSeq-CUT&Tag	H3K27ac	H3K27ac-1#1_12	69340534	11664	5944.8	11552	11480	9270	99.3767	2.16915	17551	8446	4.888
scNanoSeq-CUT&Tag	H3K27ac	H3K27ac-1#1_2	83082725	14100	5892.4	13867	13685	10766	98.6875	2.5644	20291	8178	4.151
scNanoSeq-CUT&Tag	H3K27ac	H3K27ac-1#1_3	49821328	8639	5767	8537	8466	6591	99.1683	1.54249	12089	4986	3.934
scNanoSeq-CUT&Tag	H3K27ac	H3K27ac-1#1_4	306510175	52454	5843.4	52166	51516	41175	98.754	9.55656	77514	30411	3.079
scNanoSeq-CUT&Tag	H3K27ac	H3K27ac-1#1_5	434752067	72101	6029.8	71657	70918	55415	98.9687	13.5859	105072	11900	1.109
scNanoSeq-CUT&Tag	H3K27ac	H3K27ac-1#1_6	223262686	36621	6096.6	36340	35939	28459	98.8965	6.95409	52710	19183	3.509
scNanoSeq-CUT&Tag	H3K27ac	H3K27ac-1#1_7	27398572	4956	5528.4	4794	4762	3782	99.3325	0.83576	6940	3632	2.504
scNanoSeq-CUT&Tag	H3K27ac	H3K27ac-1#1_8	154693156	26199	5904.5	25906	25666	20211	99.0736	4.82721	37916	15305	4.445
scNanoSeq-CUT&Tag	H3K27ac	H3K27ac-1#1_9	85814656	14378	5968.5	14176	14054	10962	99.1394	2.67257	20561	7713	3.484
scNanoSeq-CUT&Tag	H3K27ac	H3K27ac-1#2_1	166601927	27832	5986	27510	27192	21195	98.8441	5.16359	39987	13680	3.952
scNanoSeq-CUT&Tag	H3K27ac	H3K27ac-1#2_10	169643882	28537	5944.7	28377	28190	21974	99.341	5.3206	41598	14802	3.383
scNanoSeq-CUT&Tag	H3K27ac	H3K27ac-1#2_11	44254728	7799	5674.4	7687	7596	6043	98.8162	1.36765	11375	4289	4.267
scNanoSeq-CUT&Tag	H3K27ac	H3K27ac-1#2_12	155461182	25683	6053.1	25551	25335	20291	99.1546	4.8624	38356	18034	3.311
scNanoSeq-CUT&Tag	H3K27ac	H3K27ac-1#2_2	71350261	11968	5961.8	11785	11688	9260	99.1769	2.21206	17513	6594	3.482
scNanoSeq-CUT&Tag	H3K27ac	H3K27ac-1#2_3	275103673	47871	5746.8	47702	47283	36868	99.1216	8.61546	69748	25707	3.608
scNanoSeq-CUT&Tag	H3K27ac	H3K27ac-1#2_4	74625221	12489	5975.3	12334	12208	9783	98.9784	2.31483	18308	7783	4.204
scNanoSeq-CUT&Tag	H3K27ac	H3K27ac-1#2_5	138232576	24627	5613	24352	24159	18769	99.2075	4.31239	35366	18011	3.306
scNanoSeq-CUT&Tag	H3K27ac	H3K27ac-1#2_6	37547925	6296	5963.8	6166	6082	4916	98.6377	1.15419	9058	3682	3.618
scNanoSeq-CUT&Tag	H3K27ac	H3K27ac-1#2_7	60809645	10822	5619.1	10608	10512	8240	99.095	1.87669	15399	7405	4.163
scNanoSeq-CUT&Tag	H3K27ac	H3K27ac-1#2_8	171586772	29922	5734.5	29709	29412	23189	99.0003	5.34813	43598	12719	3.543
scNanoSeq-CUT&Tag	H3K27ac	H3K27ac-1#2_9	277366707	47086	5890.6	46786	46456	36131	99.2947	8.67509	68119	27229	3.848
scNanoSeq-CUT&Tag	H3K27ac	H3K27ac-1#3_1	234203515	39247	5967.4	38814	38391	29923	98.9102	7.2904	55960	18534	4.25
scNanoSeq-CUT&Tag	H3K27ac	H3K27ac-1#3_10	281675747	48577	5798.5	48305	47734	37409	98.8179	8.76765	70836	30260	3.449
scNanoSeq-CUT&Tag	H3K27ac	H3K27ac-1#3_11	73631847	16513	4459	16397	16257	13675	99.1462	2.26271	26036	12370	3.407
scNanoSeq-CUT&Tag	H3K27ac	H3K27ac-1#3_12	116738086	19468	5996.4	19325	19147	15230	99.0789	3.64716	28823	12387	3.98
scNanoSeq-CUT&Tag	H3K27ac	H3K27ac-1#3_2	125417183	21686	5783.3	21414	21223	16734	99.1081	3.89	31402	14825	3.014
scNanoSeq-CUT&Tag	H3K27ac	H3K27ac-1#3_3	348955753	58871	5927.5	58536	58016	45287	99.1117	10.8974	85454	26908	3.64
scNanoSeq-CUT&Tag	H3K27ac	H3K27ac-1#3_4	35996163	7281	4943.8	7197	7146	5994	99.2914	1.11145	11279	4298	3.002
scNanoSeq-CUT&Tag	H3K27ac	H3K27ac-1#3_5	146991287	24904	5902.3	24654	24380	19089	98.8886	4.57263	36186	12865	4.104
scNanoSeq-CUT&Tag	H3K27ac	H3K27ac-1#3_6	87160345	14827	5878.5	14669	14512	11422	98.9297	2.70401	21512	10914	3.623
scNanoSeq-CUT&Tag	H3K27ac	H3K27ac-1#3_7	36898874	6504	5673.3	6272	6221	4996	99.1869	1.10798	9059	5293	4.515
scNanoSeq-CUT&Tag	H3K27ac	H3K27ac-1#3_8	143320100	24750	5790.7	24520	24306	19125	99.1272	4.46555	36027	16447	3.385
scNanoSeq-CUT&Tag	H3K27ac	H3K27ac-1#3_9	119041442	20354	5848.6	20150	19959	15653	99.0521	3.70461	29329	13235	3.617
scNanoSeq-CUT&Tag	H3K27ac	H3K27ac-1#4_1	145805836	24938	5846.7	24678	24463	19908	99.1288	4.5316	37525	15847	3.439
scNanoSeq-CUT&Tag	H3K27ac	H3K27ac-1#4_10	161253730	27603	5841.9	27451	27233	22083	99.2059	5.04675	41562	15289	3.873
scNanoSeq-CUT&Tag	H3K27ac	H3K27ac-1#4_11	136948353	23380	5857.5	23166	22951	18701	99.0719	4.26735	35403	12478	3.595
scNanoSeq-CUT&Tag	H3K27ac	H3K27ac-1#4_12	75788321	12466	6079.6	12401	12309	10296	99.2581	2.37939	19344	7571	4.366
scNanoSeq-CUT&Tag	H3K27ac	H3K27ac-1#4_2	211355477	35002	6038.4	34759	34446	28086	99.0995	6.60725	52418	17259	3.783
scNanoSeq-CUT&Tag	H3K27ac	H3K27ac-1#4_3	299236714	49834	6004.7	49553	49153	39907	99.1928	9.38024	75232	24007	3.296
scNanoSeq-CUT&Tag	H3K27ac	H3K27ac-1#4_4	78677773	12833	6130.9	12741	12594	10449	98.8462	2.45892	19760	6790	3.474
scNanoSeq-CUT&Tag	H3K27ac	H3K27ac-1#4_5	106194938	18285	5807.8	18091	17945	14712	99.193	3.31309	27758	14138	4.564
scNanoSeq-CUT&Tag	H3K27ac	H3K27ac-1#4_6	94860208	16006	5926.5	15857	15725	12935	99.1676	2.9665	24382	10708	3.867
scNanoSeq-CUT&Tag	H3K27ac	H3K27ac-1#4_7	99933000	17933	5572.6	17700	17561	14262	99.2147	3.09454	26618	12957	3.48
scNanoSeq-CUT&Tag	H3K27ac	H3K27ac-1#4_8	19720241	3674	5367.5	3545	3520	2875	99.2948	0.608192	5394	2700	2.519
scNanoSeq-CUT&Tag	H3K27ac	H3K27ac-1#4_9	49536452	8886	5574.7	8749	8667	7062	99.0628	1.5345	13141	6051	3.883
scNanoSeq-CUT&Tag	H3K27ac	H3K27ac-1#5_1	107806379	18005	5987.6	17759	17614	14093	99.1835	3.34716	26315	11159	3.658
scNanoSeq-CUT&Tag	H3K27ac	H3K27ac-1#5_10	93268355	15677	5949.4	15534	15387	12409	99.0537	2.88853	23405	10204	4.095
scNanoSeq-CUT&Tag	H3K27ac	H3K27ac-1#5_11	114154944	19513	5850.2	19332	19168	15459	99.1517	3.55808	28862	12705	4.472
scNanoSeq-CUT&Tag	H3K27ac	H3K27ac-1#5_12	58653735	9761	6009	9647	9560	7958	99.0982	1.82524	14780	5972	5.08
scNanoSeq-CUT&Tag	H3K27ac	H3K27ac-1#5_2	76644767	13008	5892.1	12737	12556	10131	98.5789	2.35912	18954	7553	4.469
scNanoSeq-CUT&Tag	H3K27ac	H3K27ac-1#5_3	167649006	28318	5920.2	28092	27843	22284	99.1136	5.22169	41829	15933	3.658
scNanoSeq-CUT&Tag	H3K27ac	H3K27ac-1#5_4	372324611	70656	5269.5	70386	69550	57794	98.8123	11.547	109821	16596	3.077
scNanoSeq-CUT&Tag	H3K27ac	H3K27ac-1#5_5	371488161	61835	6007.7	61505	60899	48863	99.0147	11.6195	92402	28820	2.889
scNanoSeq-CUT&Tag	H3K27ac	H3K27ac-1#5_6	303332784	48963	6195.1	48537	48099	39062	99.0976	9.46641	73493	25004	3.601
scNanoSeq-CUT&Tag	H3K27ac	H3K27ac-1#5_7	196488259	33313	5898.2	32956	32693	26202	99.202	6.12649	49252	21060	3.247
scNanoSeq-CUT&Tag	H3K27ac	H3K27ac-1#5_8	137876657	22776	6053.6	22573	22363	18086	99.0697	4.30222	33757	10719	3.059
scNanoSeq-CUT&Tag	H3K27ac	H3K27ac-1#5_9	215928208	36267	5953.8	35894	35611	28604	99.2116	6.72472	53684	20787	3.561
scNanoSeq-CUT&Tag	H3K27ac	H3K27ac-1#6_1	164242141	27362	6002.6	27032	26819	20658	99.212	5.12818	38690	14765	4.36
scNanoSeq-CUT&Tag	H3K27ac	H3K27ac-1#6_10	114805334	19840	5786.6	19678	19506	15305	99.1259	3.56923	29058	13638	4.008
scNanoSeq-CUT&Tag	H3K27ac	H3K27ac-1#6_11	189706440	32745	5793.4	32554	32262	25136	99.103	5.90465	47586	19372	3.899
scNanoSeq-CUT&Tag	H3K27ac	H3K27ac-1#6_2	84815952	14719	5762.3	14512	14267	11365	98.3117	2.60201	21284	5865	3.589
scNanoSeq-CUT&Tag	H3K27ac	H3K27ac-1#6_3	317037250	55201	5743.3	54830	54366	42073	99.1537	9.85864	79499	33526	3.547
scNanoSeq-CUT&Tag	H3K27ac	H3K27ac-1#6_4	142834970	24237	5893.3	24073	23805	19170	98.8867	4.44099	36271	11658	3.944
scNanoSeq-CUT&Tag	H3K27ac	H3K27ac-1#6_5	79457678	13615	5836	13342	13214	10272	99.0406	2.45847	19443	8302	4.24
scNanoSeq-CUT&Tag	H3K27ac	H3K27ac-1#6_6	54310130	9244	5875.2	9035	8966	7195	99.2363	1.67094	13602	5749	3.497
scNanoSeq-CUT&Tag	H3K27ac	H3K27ac-1#6_7	182094744	31206	5835.2	30873	30530	23975	98.889	5.64691	44805	16570	4.324
scNanoSeq-CUT&Tag	H3K27ac	H3K27ac-1#6_8	253004900	42589	5940.6	42327	41966	33096	99.1471	7.89565	62590	19402	3.974
scNanoSeq-CUT&Tag	H3K27ac	H3K27ac-1#6_9	68036280	11860	5736.6	11689	11600	9242	99.2386	2.09912	17286	9019	4.295
scNanoSeq-CUT&Tag	H3K27ac	H3K27ac-1#7_10	64229949	11040	5817.9	10895	10819	8385	99.3024	1.99106	15864	9169	3.795
scNanoSeq-CUT&Tag	H3K27ac	H3K27ac-1#7_11	452348113	76355	5924.3	75981	75464	58302	99.3196	14.1673	110723	45395	3.01
scNanoSeq-CUT&Tag	H3K27ac	H3K27ac-1#7_12	358814889	59560	6024.4	59306	58805	47005	99.1552	11.219	88951	27920	3.781
scNanoSeq-CUT&Tag	H3K27ac	H3K27ac-1#7_2	113335439	19145	5919.8	18928	18766	14776	99.1441	3.53276	27900	12629	3.457
scNanoSeq-CUT&Tag	H3K27ac	H3K27ac-1#7_3	128397255	21686	5920.7	21511	21321	16830	99.1167	4.00494	31728	13815	3.916
scNanoSeq-CUT&Tag	H3K27ac	H3K27ac-1#7_4	191265979	31319	6107	31151	30857	24643	99.0562	5.99206	46539	20137	3.408
scNanoSeq-CUT&Tag	H3K27ac	H3K27ac-1#7_5	111316827	18451	6033.1	18247	18063	14099	98.9916	3.47092	26719	10512	3.616
scNanoSeq-CUT&Tag	H3K27ac	H3K27ac-1#7_6	149792718	24368	6147.1	24148	23963	19083	99.2339	4.6879	36116	14314	3.594
scNanoSeq-CUT&Tag	H3K27ac	H3K27ac-1#7_7	82313211	14101	5837.4	13780	13628	10728	98.897	2.52896	19574	7433	3.634
scNanoSeq-CUT&Tag	H3K27ac	H3K27ac-1#7_8	54913063	9106	6030.4	8963	8854	7015	98.7839	1.68484	13222	4587	4.318
scNanoSeq-CUT&Tag	H3K27ac	H3K27ac-1#7_9	252269516	41777	6038.5	41463	41180	32002	99.3175	7.89974	60141	22098	3.296
scNanoSeq-CUT&Tag	H3K27ac	H3K27ac-1#8_1	36495257	6306	5787.4	6196	6164	5069	99.4835	1.13535	9519	4826	4.924
scNanoSeq-CUT&Tag	H3K27ac	H3K27ac-1#8_10	205915638	35563	5790.2	35351	35104	29060	99.3013	6.43555	55057	22699	3.439
scNanoSeq-CUT&Tag	H3K27ac	H3K27ac-1#8_11	202848031	34859	5819.1	34650	34274	28479	98.9149	6.33158	53734	19378	3.581
scNanoSeq-CUT&Tag	H3K27ac	H3K27ac-1#8_12	126363897	20669	6113.7	20539	20399	17289	99.3184	3.95876	32561	11016	3.308
scNanoSeq-CUT&Tag	H3K27ac	H3K27ac-1#8_2	234463953	39919	5873.5	39665	39305	32395	99.0924	7.31934	61182	22075	2.68
scNanoSeq-CUT&Tag	H3K27ac	H3K27ac-1#8_3	284718744	48839	5829.7	48559	48215	39481	99.2916	8.91499	74501	31072	3.246
scNanoSeq-CUT&Tag	H3K27ac	H3K27ac-1#8_4	45942960	7660	5997.8	7575	7490	6367	98.8779	1.42696	11941	5057	3.972
scNanoSeq-CUT&Tag	H3K27ac	H3K27ac-1#8_5	187687143	33001	5687.3	32787	32531	26913	99.2192	5.87203	51145	17432	4.261
scNanoSeq-CUT&Tag	H3K27ac	H3K27ac-1#8_6	95934955	16205	5920.1	15906	15736	13101	98.9312	2.9797	24692	8741	4.079
scNanoSeq-CUT&Tag	H3K27ac	H3K27ac-1#8_7	191668185	32584	5882.3	32223	31844	26163	98.8238	5.94684	49116	17449	3.486
scNanoSeq-CUT&Tag	H3K27ac	H3K27ac-1#8_8	54895486	10003	5487.9	9712	9641	7950	99.2689	1.68961	15018	8540	5.009
scNanoSeq-CUT&Tag	H3K27ac	H3K27ac-1#8_9	35491898	6015	5900.6	5868	5789	4833	98.6537	1.0653	9055	3367	2.94
scNanoSeq-CUT&Tag	H3K27me3	H3K27me3-1#17_10	228022495	44381	5137.8	44030	43400	38320	98.5692	6.99281	71138	24922	1.992
scNanoSeq-CUT&Tag	H3K27me3	H3K27me3-1#17_11	114751815	23238	4938.1	22982	22690	19754	98.7294	3.49383	36568	16537	1.544
scNanoSeq-CUT&Tag	H3K27me3	H3K27me3-1#17_12	19359249	3671	5273.6	3625	3584	3305	98.869	0.587022	6052	3051	1.795
scNanoSeq-CUT&Tag	H3K27me3	H3K27me3-1#17_2	54889996	11902	4611.8	11760	11631	10815	98.9031	1.66756	19968	8444	1.653
scNanoSeq-CUT&Tag	H3K27me3	H3K27me3-1#17_3	402565929	84605	4758.2	83653	82632	74762	98.7795	12.2993	137557	35600	1.461
scNanoSeq-CUT&Tag	H3K27me3	H3K27me3-1#17_4	85120821	17546	4851.3	17419	17200	15833	98.7428	2.60682	29546	12267	1.605
scNanoSeq-CUT&Tag	H3K27me3	H3K27me3-1#17_5	24952464	4838	5157.6	4712	4645	4226	98.5781	0.75092	7840	2921	1.797
scNanoSeq-CUT&Tag	H3K27me3	H3K27me3-1#17_6	330664414	63579	5200.8	62883	62072	54504	98.7103	10.148	100852	32588	1.427
scNanoSeq-CUT&Tag	H3K27me3	H3K27me3-1#17_7	186004252	35959	5172.7	35434	34988	30948	98.7413	5.6725	56684	25836	2.036
scNanoSeq-CUT&Tag	H3K27me3	H3K27me3-1#17_8	60835369	11907	5109.2	11733	11571	10245	98.6193	1.85176	19015	8672	1.906
scNanoSeq-CUT&Tag	H3K27me3	H3K27me3-1#17_9	205245535	40675	5046	40155	39674	34664	98.8021	6.27431	63748	25036	1.917
scNanoSeq-CUT&Tag	H3K27me3	H3K27me3-1#18_10	35697456	6722	5310.5	6578	6495	5636	98.7382	1.06624	10235	5333	1.53
scNanoSeq-CUT&Tag	H3K27me3	H3K27me3-1#18_11	327371880	63108	5187.5	62335	61500	52151	98.6605	10.0078	96173	32159	1.581
scNanoSeq-CUT&Tag	H3K27me3	H3K27me3-1#18_12	348958817	65740	5308.2	65141	64344	55274	98.7765	10.7247	102601	34683	1.725
scNanoSeq-CUT&Tag	H3K27me3	H3K27me3-1#18_3	76277981	16493	4624.9	16244	16067	14648	98.9104	2.29966	26766	11195	1.872
scNanoSeq-CUT&Tag	H3K27me3	H3K27me3-1#18_4	89247453	18865	4730.8	18734	18502	17245	98.7616	2.71573	32194	11297	1.416
scNanoSeq-CUT&Tag	H3K27me3	H3K27me3-1#18_5	407166162	76952	5291.2	76354	75306	64610	98.6274	12.5178	119876	36615	1.641
scNanoSeq-CUT&Tag	H3K27me3	H3K27me3-1#18_6	232050002	43255	5364.7	42772	42219	36502	98.7071	7.11506	67305	20971	1.569
scNanoSeq-CUT&Tag	H3K27me3	H3K27me3-1#18_7	455432302	85582	5321.6	84490	83334	71406	98.6318	13.935	130854	42328	1.718
scNanoSeq-CUT&Tag	H3K27me3	H3K27me3-1#18_8	78334228	15069	5198.4	14829	14639	12798	98.7187	2.37403	23489	12397	1.731
scNanoSeq-CUT&Tag	H3K27me3	H3K27me3-1#18_9	573239374	111557	5138.5	110299	108826	92282	98.6645	17.529	170395	57616	1.88
scNanoSeq-CUT&Tag	H3K27me3	H3K27me3-1#19_1	185171461	37509	4936.7	37032	36596	32798	98.8226	5.64452	60796	21805	1.659
scNanoSeq-CUT&Tag	H3K27me3	H3K27me3-1#19_10	243343955	45968	5293.8	45548	44881	38209	98.5356	7.45265	70743	28726	1.535
scNanoSeq-CUT&Tag	H3K27me3	H3K27me3-1#19_11	399553329	75694	5278.5	74947	74067	62531	98.8258	12.272	115926	41930	1.576
scNanoSeq-CUT&Tag	H3K27me3	H3K27me3-1#19_12	296401948	55454	5345	54993	54233	46171	98.618	9.10481	85555	33508	1.949
scNanoSeq-CUT&Tag	H3K27me3	H3K27me3-1#19_3	269746053	55259	4881.5	54660	53982	47614	98.7596	8.2359	87878	29594	1.77
scNanoSeq-CUT&Tag	H3K27me3	H3K27me3-1#19_4	121240099	24825	4883.8	24642	24304	22060	98.6284	3.69931	41050	17128	1.712
scNanoSeq-CUT&Tag	H3K27me3	H3K27me3-1#19_5	326827938	62327	5243.8	61745	60865	51511	98.5748	10.0225	95840	38978	1.678
scNanoSeq-CUT&Tag	H3K27me3	H3K27me3-1#19_6	455370256	86379	5271.8	85260	84125	71051	98.6688	13.9479	131521	47041	1.551
scNanoSeq-CUT&Tag	H3K27me3	H3K27me3-1#19_7	246101183	49959	4926.1	48378	47789	41197	98.7825	7.45572	75465	34696	1.847
scNanoSeq-CUT&Tag	H3K27me3	H3K27me3-1#19_8	264429416	50615	5224.3	50040	49277	41765	98.4752	8.0875	77550	21108	1.798
scNanoSeq-CUT&Tag	H3K27me3	H3K27me3-1#19_9	450284304	87606	5139.9	86641	85500	71704	98.6831	13.7611	132523	49151	1.549
scNanoSeq-CUT&Tag	H3K27me3	H3K27me3-1#20_1	54800227	11348	4829.1	11152	10997	10063	98.6101	1.64748	18578	8239	1.828
scNanoSeq-CUT&Tag	H3K27me3	H3K27me3-1#20_10	168212812	32096	5240.9	31803	31498	26971	99.041	5.17694	50320	15845	1.486
scNanoSeq-CUT&Tag	H3K27me3	H3K27me3-1#20_11	314312022	60361	5207.2	59731	58957	50646	98.7042	9.62884	93633	33464	1.653
scNanoSeq-CUT&Tag	H3K27me3	H3K27me3-1#20_12	368403911	69985	5264	69412	68515	58630	98.7077	11.3303	109332	39600	1.634
scNanoSeq-CUT&Tag	H3K27me3	H3K27me3-1#20_2	60920354	12325	4942.8	12158	12002	10880	98.7169	1.85559	20078	7984	1.327
scNanoSeq-CUT&Tag	H3K27me3	H3K27me3-1#20_3	189177450	41576	4550.2	41093	40614	36353	98.8344	5.76233	66878	29288	1.438
scNanoSeq-CUT&Tag	H3K27me3	H3K27me3-1#20_4	93083868	19074	4880.1	18946	18713	17055	98.7702	2.84953	31849	12918	1.811
scNanoSeq-CUT&Tag	H3K27me3	H3K27me3-1#20_6	313926598	58786	5340.2	58197	57425	49462	98.6735	9.64082	91767	33003	1.689
scNanoSeq-CUT&Tag	H3K27me3	H3K27me3-1#20_7	145650845	29795	4888.4	29360	28976	25478	98.6921	4.4186	46669	23477	1.928
scNanoSeq-CUT&Tag	H3K27me3	H3K27me3-1#20_8	323044144	63993	5048.1	63436	62683	53990	98.813	9.91619	100178	38536	1.72
scNanoSeq-CUT&Tag	H3K27me3	H3K27me3-1#20_9	509022390	100215	5079.3	99177	97953	83871	98.7658	15.5957	154659	58653	1.322
scNanoSeq-CUT&Tag	H3K27me3	H3K27me3-1#21_1	172128239	33110	5198.7	32675	32230	28215	98.6381	5.25596	52035	15257	1.505
scNanoSeq-CUT&Tag	H3K27me3	H3K27me3-1#21_10	222909803	41425	5381	41027	40485	34377	98.6789	6.84426	63671	26706	1.526
scNanoSeq-CUT&Tag	H3K27me3	H3K27me3-1#21_11	263303017	49653	5302.9	49073	48438	40787	98.706	8.05771	75416	34171	1.728
scNanoSeq-CUT&Tag	H3K27me3	H3K27me3-1#21_12	164638373	30472	5402.9	30195	29779	25342	98.6223	5.05089	46974	17445	1.63
scNanoSeq-CUT&Tag	H3K27me3	H3K27me3-1#21_2	48846076	9755	5007.3	9520	9374	8301	98.4664	1.45934	15309	8872	1.797
scNanoSeq-CUT&Tag	H3K27me3	H3K27me3-1#21_3	257129534	52027	4942.2	51471	50855	43865	98.8032	7.86491	81382	32708	1.45
scNanoSeq-CUT&Tag	H3K27me3	H3K27me3-1#21_4	96812715	18352	5275.3	18189	17963	15901	98.7575	2.97188	29571	12627	1.736
scNanoSeq-CUT&Tag	H3K27me3	H3K27me3-1#21_5	243641911	45164	5394.6	44672	44131	37508	98.789	7.49205	69569	29613	2.126
scNanoSeq-CUT&Tag	H3K27me3	H3K27me3-1#21_6	53588965	9816	5459.3	9599	9484	8300	98.802	1.61864	15220	6838	1.459
scNanoSeq-CUT&Tag	H3K27me3	H3K27me3-1#21_7	322323101	59913	5379.9	58938	58352	49443	99.0057	9.88362	90102	34563	1.81
scNanoSeq-CUT&Tag	H3K27me3	H3K27me3-1#21_8	372022121	69375	5362.5	68646	67630	57306	98.5199	11.4072	105766	37823	1.644
scNanoSeq-CUT&Tag	H3K27me3	H3K27me3-1#21_9	155030976	30169	5138.8	29725	29367	24727	98.7956	4.72218	45652	14607	1.585
scNanoSeq-CUT&Tag	H3K27me3	H3K27me3-1#22_1	203793084	39642	5140.8	39091	38622	34142	98.8002	6.21972	63168	18785	1.423
scNanoSeq-CUT&Tag	H3K27me3	H3K27me3-1#22_10	267409280	49689	5381.7	49257	48540	41345	98.5444	8.18933	76633	29121	1.534
scNanoSeq-CUT&Tag	H3K27me3	H3K27me3-1#22_11	374113872	70487	5307.6	69616	68790	58178	98.8135	11.4507	107598	43000	1.782
scNanoSeq-CUT&Tag	H3K27me3	H3K27me3-1#22_12	41559414	7774	5345.9	7626	7568	6599	99.2394	1.25822	12114	6363	1.808
scNanoSeq-CUT&Tag	H3K27me3	H3K27me3-1#22_2	199605013	37968	5257.2	37502	36964	32574	98.5654	6.09826	60204	19704	1.621
scNanoSeq-CUT&Tag	H3K27me3	H3K27me3-1#22_3	224454926	42988	5221.3	42516	41995	37196	98.7746	6.87403	68743	22639	1.531
scNanoSeq-CUT&Tag	H3K27me3	H3K27me3-1#22_4	146282723	28100	5205.8	27908	27576	24683	98.8104	4.49156	45942	19433	1.721
scNanoSeq-CUT&Tag	H3K27me3	H3K27me3-1#22_5	30319857	5600	5414.3	5465	5405	4652	98.9021	0.912891	8505	4447	1.449
scNanoSeq-CUT&Tag	H3K27me3	H3K27me3-1#22_6	358633574	65731	5456.1	65013	64170	54895	98.7033	10.99	101372	37383	1.755
scNanoSeq-CUT&Tag	H3K27me3	H3K27me3-1#22_7	306786756	57855	5302.7	57110	56395	48019	98.748	9.38107	88380	34738	1.461
scNanoSeq-CUT&Tag	H3K27me3	H3K27me3-1#22_8	194062025	37716	5145.4	37323	36820	31686	98.6523	5.92999	58658	27750	1.571
scNanoSeq-CUT&Tag	H3K27me3	H3K27me3-1#22_9	425427043	79660	5340.5	78694	77659	65382	98.6848	13.0253	120206	37184	1.635
scNanoSeq-CUT&Tag	H3K27me3	H3K27me3-1#23_10	169297546	31883	5310	31604	31144	26642	98.5445	5.17197	49507	23490	1.592
scNanoSeq-CUT&Tag	H3K27me3	H3K27me3-1#23_11	189116347	36654	5159.5	36141	35671	30266	98.6995	5.75566	55967	27885	1.703
scNanoSeq-CUT&Tag	H3K27me3	H3K27me3-1#23_12	32114850	5966	5383	5823	5763	4988	98.9696	0.965881	9148	4283	1.595
scNanoSeq-CUT&Tag	H3K27me3	H3K27me3-1#23_2	130839055	26773	4887	26479	26121	23605	98.648	3.98589	43773	14071	1.561
scNanoSeq-CUT&Tag	H3K27me3	H3K27me3-1#23_3	229640694	47641	4820.2	47182	46589	41780	98.7432	7.01845	77224	23573	2.07
scNanoSeq-CUT&Tag	H3K27me3	H3K27me3-1#23_4	103938716	21391	4859	21248	20988	19082	98.7764	3.17812	35680	12999	1.539
scNanoSeq-CUT&Tag	H3K27me3	H3K27me3-1#23_5	286851548	54762	5238.1	54228	53453	45342	98.5708	8.80506	84523	32723	1.96
scNanoSeq-CUT&Tag	H3K27me3	H3K27me3-1#23_6	328224287	60590	5417.1	59958	59299	50564	98.9009	10.0953	93643	35226	1.427
scNanoSeq-CUT&Tag	H3K27me3	H3K27me3-1#23_7	488751895	90881	5377.9	89837	88749	75074	98.7889	15.0127	138231	38016	1.685
scNanoSeq-CUT&Tag	H3K27me3	H3K27me3-1#23_8	133879930	25854	5178.3	25570	25272	21585	98.8346	4.09402	39968	16738	1.967
scNanoSeq-CUT&Tag	H3K27me3	H3K27me3-1#23_9	416291680	79346	5246.5	78449	77320	65156	98.5608	12.7292	120126	47814	1.871
scNanoSeq-CUT&Tag	H3K27me3	H3K27me3-1#24_10	449850432	83939	5359.3	83249	82131	68596	98.657	13.8216	127728	44235	1.738
scNanoSeq-CUT&Tag	H3K27me3	H3K27me3-1#24_11	118313369	23129	5115.4	22764	22459	18713	98.6602	3.58887	34652	16055	1.582
scNanoSeq-CUT&Tag	H3K27me3	H3K27me3-1#24_12	241841159	45939	5264.4	45432	44828	38123	98.6705	7.40224	70813	29480	1.327
scNanoSeq-CUT&Tag	H3K27me3	H3K27me3-1#24_5	388177384	75029	5173.7	74274	73329	61406	98.7277	11.9129	114094	51724	1.531
scNanoSeq-CUT&Tag	H3K27me3	H3K27me3-1#24_6	487189152	90959	5356.1	89931	88850	73994	98.798	14.9527	136902	47069	1.556
scNanoSeq-CUT&Tag	H3K27me3	H3K27me3-1#24_7	463881057	87790	5284	86584	85504	71622	98.7527	14.1984	131639	37232	1.489
scNanoSeq-CUT&Tag	H3K27me3	H3K27me3-1#24_8	225920013	42850	5272.3	42346	41799	34763	98.7083	6.90948	64292	19086	1.622
scNanoSeq-CUT&Tag	H3K27me3	H3K27me3-1#24_9	364296198	70710	5152	69947	68974	57260	98.6089	11.1284	105602	46077	1.538
scNanoSeq-CUT&Tag	H3K4me3	H3K4me3-1#1_1	124591854	28923	4307.7	28392	28059	22304	98.8271	3.74848	41148	30331	5.407
scNanoSeq-CUT&Tag	H3K4me3	H3K4me3-1#1_10	212702943	43658	4872	43120	42607	32469	98.8103	6.49544	60249	43178	4.414
scNanoSeq-CUT&Tag	H3K4me3	H3K4me3-1#1_11	201089489	42836	4694.4	42176	41694	32111	98.8572	6.1044	59469	41408	4.339
scNanoSeq-CUT&Tag	H3K4me3	H3K4me3-1#1_12	173751385	36018	4824	35641	35265	27511	98.945	5.31657	51089	40143	5.117
scNanoSeq-CUT&Tag	H3K4me3	H3K4me3-1#1_2	157260524	31486	4994.6	30982	30627	23933	98.8542	4.79003	44152	32399	5.042
scNanoSeq-CUT&Tag	H3K4me3	H3K4me3-1#1_3	244651769	51802	4722.8	51147	50663	38053	99.0537	7.46628	70056	56562	5.501
scNanoSeq-CUT&Tag	H3K4me3	H3K4me3-1#1_4	197412917	39341	5018	38981	38629	29826	99.097	6.07033	55507	38006	4.837
scNanoSeq-CUT&Tag	H3K4me3	H3K4me3-1#1_5	161565094	35205	4589.3	34724	34339	26448	98.8913	4.92159	49254	36110	5.261
scNanoSeq-CUT&Tag	H3K4me3	H3K4me3-1#1_6	307772740	68754	4476.4	67498	66816	48947	98.9896	9.30278	90417	70603	4.914
scNanoSeq-CUT&Tag	H3K4me3	H3K4me3-1#1_7	115825671	25311	4576.1	24654	24396	18837	98.9535	3.47763	34482	25580	4.956
scNanoSeq-CUT&Tag	H3K4me3	H3K4me3-1#1_8	240136024	50353	4769.1	49692	49116	36969	98.8409	7.30962	68209	44842	4.235
scNanoSeq-CUT&Tag	H3K4me3	H3K4me3-1#1_9	19553039	4562	4286.1	4246	4190	3447	98.6811	0.538606	6206	4276	4.292
scNanoSeq-CUT&Tag	H3K4me3	H3K4me3-1#2_1	212110800	42945	4939.1	42206	41682	31466	98.7585	6.44897	58305	42283	5.034
scNanoSeq-CUT&Tag	H3K4me3	H3K4me3-1#2_10	312258175	62686	4981.3	62101	61290	45376	98.6941	9.56202	83969	57376	4.55
scNanoSeq-CUT&Tag	H3K4me3	H3K4me3-1#2_11	281640990	58457	4817.9	57768	57031	42365	98.7242	8.5861	78349	55898	4.466
scNanoSeq-CUT&Tag	H3K4me3	H3K4me3-1#2_12	91790477	18719	4903.6	18461	18312	14066	99.1929	2.7995	25947	21903	5.585
scNanoSeq-CUT&Tag	H3K4me3	H3K4me3-1#2_2	364590391	71579	5093.5	70862	70059	53382	98.8668	11.2077	98417	69992	5.424
scNanoSeq-CUT&Tag	H3K4me3	H3K4me3-1#2_3	47425363	9848	4815.7	9523	9409	7104	98.8029	1.40927	13336	9826	4.866
scNanoSeq-CUT&Tag	H3K4me3	H3K4me3-1#2_4	180530409	35974	5018.4	35589	35290	26749	99.1599	5.54117	49622	36151	5.174
scNanoSeq-CUT&Tag	H3K4me3	H3K4me3-1#2_5	291070868	62073	4689.2	60944	60254	44913	98.8678	8.84111	83203	66011	4.758
scNanoSeq-CUT&Tag	H3K4me3	H3K4me3-1#2_7	213087015	44176	4823.6	43106	42689	31300	99.0326	6.47782	57537	43128	5.288
scNanoSeq-CUT&Tag	H3K4me3	H3K4me3-1#2_8	209247589	44674	4683.9	44132	43676	32960	98.9667	6.3832	60905	39739	4.575
scNanoSeq-CUT&Tag	H3K4me3	H3K4me3-1#2_9	278931215	57394	4859.9	56657	55946	41419	98.7451	8.49362	76340	51889	4.606
scNanoSeq-CUT&Tag	H3K4me3	H3K4me3-1#3_1	192231730	41142	4672.4	40243	39823	29555	98.9563	5.8039	54507	40421	4.209
scNanoSeq-CUT&Tag	H3K4me3	H3K4me3-1#3_10	291287054	57179	5094.3	56499	55829	41003	98.8141	8.91374	75914	50535	4.857
scNanoSeq-CUT&Tag	H3K4me3	H3K4me3-1#3_11	350411762	72660	4822.6	71572	70849	51145	98.9898	10.6978	94229	72739	5.294
scNanoSeq-CUT&Tag	H3K4me3	H3K4me3-1#3_12	257648342	51360	5016.5	50754	50116	37787	98.743	7.8767	70174	43878	4.445
scNanoSeq-CUT&Tag	H3K4me3	H3K4me3-1#3_2	64990487	13190	4927.3	12049	11918	9106	98.9128	1.87662	16115	14835	5.394
scNanoSeq-CUT&Tag	H3K4me3	H3K4me3-1#3_3	284974281	58732	4852.1	57899	57418	41422	99.1692	8.7241	76244	59073	5.138
scNanoSeq-CUT&Tag	H3K4me3	H3K4me3-1#3_4	241113136	49483	4872.6	48963	48454	36920	98.9604	7.38078	68414	52464	4.755
scNanoSeq-CUT&Tag	H3K4me3	H3K4me3-1#3_5	246135112	50684	4856.3	49978	49411	37632	98.8655	7.53314	69764	48360	4.554
scNanoSeq-CUT&Tag	H3K4me3	H3K4me3-1#3_6	88880347	18621	4773.1	18152	17976	13431	99.0304	2.67061	24822	21664	5.139
scNanoSeq-CUT&Tag	H3K4me3	H3K4me3-1#3_7	120929684	25451	4751.5	24689	24475	18381	99.1332	3.63226	33023	28751	4.858
scNanoSeq-CUT&Tag	H3K4me3	H3K4me3-1#3_8	205077597	42793	4792.3	42281	41812	30369	98.8908	6.26064	55733	42035	5.144
scNanoSeq-CUT&Tag	H3K4me3	H3K4me3-1#3_9	332477202	68114	4881.2	67156	66383	48679	98.8489	10.1195	89495	62815	4.364
scNanoSeq-CUT&Tag	H3K4me3	H3K4me3-1#4_1	209813702	44430	4722.3	43711	43239	33441	98.9202	6.37678	61976	44476	4.471
scNanoSeq-CUT&Tag	H3K4me3	H3K4me3-1#4_10	299725747	62187	4819.7	61647	60926	45951	98.8304	9.17752	85301	66944	5.229
scNanoSeq-CUT&Tag	H3K4me3	H3K4me3-1#4_11	264078836	54750	4823.4	53950	53353	40306	98.8934	8.02267	74590	58208	5.448
scNanoSeq-CUT&Tag	H3K4me3	H3K4me3-1#4_12	206577140	42753	4831.9	42318	41870	32311	98.9413	6.31334	59923	48768	5.307
scNanoSeq-CUT&Tag	H3K4me3	H3K4me3-1#4_2	247110369	50206	4921.9	49563	49100	38382	99.0658	7.57118	70721	53029	4.656
scNanoSeq-CUT&Tag	H3K4me3	H3K4me3-1#4_3	325283286	67883	4791.8	67073	66375	49436	98.9593	9.93605	91316	70548	5.638
scNanoSeq-CUT&Tag	H3K4me3	H3K4me3-1#4_4	157395392	31781	4952.5	31423	31102	24180	98.9785	4.82097	44856	33982	5.195
scNanoSeq-CUT&Tag	H3K4me3	H3K4me3-1#4_5	104291371	22890	4556.2	22357	22136	16981	99.0115	3.13459	31349	26132	4.197
scNanoSeq-CUT&Tag	H3K4me3	H3K4me3-1#4_6	239356974	48352	4950.3	47760	47220	35704	98.8693	7.31306	66159	44189	4.542
scNanoSeq-CUT&Tag	H3K4me3	H3K4me3-1#4_7	160923023	35543	4527.6	33774	33449	26062	99.0377	4.85831	47877	35178	4.935
scNanoSeq-CUT&Tag	H3K4me3	H3K4me3-1#4_8	263448821	54737	4813	54093	53466	40076	98.8409	8.05161	74159	48811	4.412
scNanoSeq-CUT&Tag	H3K4me3	H3K4me3-1#4_9	133961466	29149	4595.7	28771	28442	21843	98.8565	4.06082	40399	30729	3.961
scNanoSeq-CUT&Tag	H3K4me3	H3K4me3-1#5_1	252763089	51604	4898.1	50052	49498	36038	98.8932	7.65007	66132	48883	5.055
scNanoSeq-CUT&Tag	H3K4me3	H3K4me3-1#5_10	195472505	39489	4950	38927	38576	28407	99.0983	5.95099	52678	38645	5.897
scNanoSeq-CUT&Tag	H3K4me3	H3K4me3-1#5_11	216072479	43845	4928.1	43214	42702	31652	98.8152	6.56481	58151	41779	4.264
scNanoSeq-CUT&Tag	H3K4me3	H3K4me3-1#5_12	107998614	22292	4844.7	21779	21561	16875	98.999	3.26659	31179	27179	4.799
scNanoSeq-CUT&Tag	H3K4me3	H3K4me3-1#5_2	215676847	40783	5288.4	40182	39719	30253	98.8477	6.59852	55114	36494	4.742
scNanoSeq-CUT&Tag	H3K4me3	H3K4me3-1#5_3	540557780	113571	4759.6	110976	109624	79029	98.7817	16.4416	145564	95045	3.833
scNanoSeq-CUT&Tag	H3K4me3	H3K4me3-1#5_4	219903382	42101	5223.2	41511	41063	31253	98.9208	6.73004	57697	38245	5.289
scNanoSeq-CUT&Tag	H3K4me3	H3K4me3-1#5_5	140889413	29971	4700.9	29109	28754	21350	98.7804	4.21807	39403	33001	4.726
scNanoSeq-CUT&Tag	H3K4me3	H3K4me3-1#5_6	231761166	47521	4877	46733	46258	33730	98.9836	7.03854	62254	45382	4.686
scNanoSeq-CUT&Tag	H3K4me3	H3K4me3-1#5_7	189106164	37369	5060.5	36656	36248	26967	98.8869	5.72976	48966	34505	4.215
scNanoSeq-CUT&Tag	H3K4me3	H3K4me3-1#5_8	243525027	51421	4735.9	50572	50148	36354	99.1616	7.43163	66701	56460	5.507
scNanoSeq-CUT&Tag	H3K4me3	H3K4me3-1#5_9	285224845	57005	5003.5	56006	55339	40377	98.8091	8.65943	73917	53453	5.042
scNanoSeq-CUT&Tag	H3K4me3	H3K4me3-1#6_1	285991787	58485	4890	57260	56712	40949	99.043	8.70011	75372	58060	4.98
scNanoSeq-CUT&Tag	H3K4me3	H3K4me3-1#6_10	221142042	45472	4863.3	44914	44391	32243	98.8356	6.74198	59454	44301	4.898
scNanoSeq-CUT&Tag	H3K4me3	H3K4me3-1#6_11	203390260	42664	4767.3	41968	41507	30230	98.9015	6.18068	55919	40727	4.687
scNanoSeq-CUT&Tag	H3K4me3	H3K4me3-1#6_12	267483085	53394	5009.6	52504	51853	38882	98.7601	8.17686	71896	47572	4.923
scNanoSeq-CUT&Tag	H3K4me3	H3K4me3-1#6_2	85056294	16870	5041.9	16243	16152	12245	99.4398	2.59705	22646	18550	5.948
scNanoSeq-CUT&Tag	H3K4me3	H3K4me3-1#6_3	110809181	23652	4685	22755	22486	16322	98.8178	3.33115	29261	24415	4.761
scNanoSeq-CUT&Tag	H3K4me3	H3K4me3-1#6_4	178025559	34613	5143.3	33836	33459	25210	98.8858	5.41506	46679	35662	5.804
scNanoSeq-CUT&Tag	H3K4me3	H3K4me3-1#6_5	116200507	24385	4765.2	23627	23375	17109	98.9334	3.49099	31510	28513	5.707
scNanoSeq-CUT&Tag	H3K4me3	H3K4me3-1#6_6	103605904	21027	4927.3	20543	20316	14838	98.895	3.12252	27486	24779	5.473
scNanoSeq-CUT&Tag	H3K4me3	H3K4me3-1#6_7	214393479	43951	4878	42968	42449	30663	98.7921	6.48301	56231	42112	5.164
scNanoSeq-CUT&Tag	H3K4me3	H3K4me3-1#6_8	110312242	23114	4772.5	22653	22423	16173	98.9847	3.34283	29314	26812	5.171
scNanoSeq-CUT&Tag	H3K4me3	H3K4me3-1#6_9	306083521	79455	3852.3	62498	61795	44905	98.8752	9.04383	82702	57621	4.054
scNanoSeq-CUT&Tag	H3K4me3	H3K4me3-1#7_1	280012410	56036	4997	54999	54276	39132	98.6854	8.49643	71870	48264	4.512
scNanoSeq-CUT&Tag	H3K4me3	H3K4me3-1#7_10	234514310	47832	4902.9	47257	46722	33885	98.8679	7.16118	62827	45260	5.487
scNanoSeq-CUT&Tag	H3K4me3	H3K4me3-1#7_11	273966122	55216	4961.7	54352	53645	38584	98.6992	8.32095	71100	48991	4.796
scNanoSeq-CUT&Tag	H3K4me3	H3K4me3-1#7_12	193213689	38106	5070.4	37583	37258	27797	99.1352	5.91721	51513	38814	5.461
scNanoSeq-CUT&Tag	H3K4me3	H3K4me3-1#7_2	191614305	36787	5208.8	36216	35830	26857	98.9342	5.8537	49316	36662	5.243
scNanoSeq-CUT&Tag	H3K4me3	H3K4me3-1#7_3	179262074	37166	4823.3	36382	36011	25887	98.9803	5.43786	47555	37779	5.086
scNanoSeq-CUT&Tag	H3K4me3	H3K4me3-1#7_4	185048940	36356	5089.9	35734	35336	26574	98.8862	5.64782	49077	35139	4.823
scNanoSeq-CUT&Tag	H3K4me3	H3K4me3-1#7_5	207733512	41368	5021.6	40658	40154	28843	98.7604	6.31294	53169	38059	4.863
scNanoSeq-CUT&Tag	H3K4me3	H3K4me3-1#7_6	269113784	54643	4924.9	53804	53235	38291	98.9425	8.20007	70175	56287	4.094
scNanoSeq-CUT&Tag	H3K4me3	H3K4me3-1#7_7	145629068	29954	4861.8	28829	28541	21189	99.001	4.36419	38211	32187	5.621
scNanoSeq-CUT&Tag	H3K4me3	H3K4me3-1#7_8	275986550	56144	4915.7	55407	54784	39388	98.8756	8.42447	72614	51864	4.997
scNanoSeq-CUT&Tag	H3K4me3	H3K4me3-1#7_9	100092458	20745	4824.9	20148	19946	14373	98.9974	2.9882	26025	22448	5.845
scNanoSeq-CUT&Tag	H3K4me3	H3K4me3-1#8_1	407113341	83250	4890.3	81841	80841	59412	98.7781	12.3801	109745	83432	5.189
scNanoSeq-CUT&Tag	H3K4me3	H3K4me3-1#8_10	305773094	65789	4647.8	65230	64476	48361	98.8441	9.34414	89755	69434	5.342
scNanoSeq-CUT&Tag	H3K4me3	H3K4me3-1#8_11	256504800	53107	4830	52369	51747	38265	98.8123	7.81253	70906	50029	4.42
scNanoSeq-CUT&Tag	H3K4me3	H3K4me3-1#8_12	143150196	29438	4862.8	29061	28831	22334	99.2086	4.37999	41118	34440	5.576
scNanoSeq-CUT&Tag	H3K4me3	H3K4me3-1#8_2	207386521	41402	5009.1	40869	40502	30880	99.102	6.35981	56985	39525	4.171
scNanoSeq-CUT&Tag	H3K4me3	H3K4me3-1#8_3	225385186	47058	4789.5	46406	45987	33758	99.0971	6.8821	62172	46578	4.867
scNanoSeq-CUT&Tag	H3K4me3	H3K4me3-1#8_4	100358821	20433	4911.6	20087	19909	15239	99.1139	3.05089	28392	25401	5.478
scNanoSeq-CUT&Tag	H3K4me3	H3K4me3-1#8_5	31542060	7507	4201.7	7416	7339	6003	98.9617	0.952833	11152	10001	5.037
scNanoSeq-CUT&Tag	H3K4me3	H3K4me3-1#8_6	155963765	30943	5040.4	30360	30015	22292	98.8636	4.75123	41221	30869	6.308
scNanoSeq-CUT&Tag	H3K4me3	H3K4me3-1#8_7	94268455	37379	2522	16249	15956	12111	98.1968	2.47021	21477	18207	5.473
scNanoSeq-CUT&Tag	H3K4me3	H3K4me3-1#8_8	139054504	29157	4769.2	28481	28134	21089	98.7816	4.20602	38809	32215	4.447
scNanoSeq-CUT&Tag	H3K4me3	H3K4me3-1#8_9	272608968	57422	4747.5	56142	55605	41711	99.0435	8.28178	76757	58525	4.804
scNanoSeq-CUT&Tag	H3K9me3	H3K9me3-1#10_10	59192059	10965	5398.3	10652	9379	7410	88.0492	1.57608	13255	5627	4.803
scNanoSeq-CUT&Tag	H3K9me3	H3K9me3-1#10_11	667414514	119586	5581	117697	97424	76077	82.7753	17.0503	135754	35949	3.197
scNanoSeq-CUT&Tag	H3K9me3	H3K9me3-1#10_12	110134246	18832	5848.3	18368	14899	12157	81.1139	2.72074	21674	9749	4.037
scNanoSeq-CUT&Tag	H3K9me3	H3K9me3-1#10_3	31951018	7105	4497	6903	5971	5455	86.4986	0.816432	9762	3926	2.54
scNanoSeq-CUT&Tag	H3K9me3	H3K9me3-1#10_4	164787096	29921	5507.4	29617	25322	20720	85.4982	4.35364	37508	14493	2.582
scNanoSeq-CUT&Tag	H3K9me3	H3K9me3-1#10_5	186979332	33595	5565.7	33013	27137	21604	82.201	4.72567	38830	13836	2.769
scNanoSeq-CUT&Tag	H3K9me3	H3K9me3-1#10_6	244097521	43446	5618.4	42650	35237	28383	82.619	6.19292	50543	20503	2.957
scNanoSeq-CUT&Tag	H3K9me3	H3K9me3-1#10_7	31813775	5916	5377.6	5308	4325	3592	81.4808	0.740608	6211	2914	2.463
scNanoSeq-CUT&Tag	H3K9me3	H3K9me3-1#10_8	165911384	29538	5616.9	29033	23604	18916	81.3006	4.13198	33600	11738	3.039
scNanoSeq-CUT&Tag	H3K9me3	H3K9me3-1#10_9	182604520	32889	5552.1	32016	26026	20337	81.2906	4.49896	36000	15135	1.973
scNanoSeq-CUT&Tag	H3K9me3	H3K9me3-1#11_1	60038884	10795	5561.7	10339	8707	6926	84.2151	1.5118	12337	5890	2.376
scNanoSeq-CUT&Tag	H3K9me3	H3K9me3-1#11_10	185897449	36090	5150.9	35365	26486	21007	74.8933	4.2333	37351	17000	1.555
scNanoSeq-CUT&Tag	H3K9me3	H3K9me3-1#11_11	423579745	75766	5590.6	74483	60718	47504	81.5193	10.605	84731	29060	2.704
scNanoSeq-CUT&Tag	H3K9me3	H3K9me3-1#11_12	109573701	19471	5627.5	19066	16212	12888	85.0309	2.8372	23194	10079	4.081
scNanoSeq-CUT&Tag	H3K9me3	H3K9me3-1#11_2	321948425	55878	5761.6	54874	45683	36818	83.2507	8.24573	65867	22298	3.299
scNanoSeq-CUT&Tag	H3K9me3	H3K9me3-1#11_3	485217859	92366	5253.2	89990	70750	56234	78.6198	11.7152	100077	36275	1.995
scNanoSeq-CUT&Tag	H3K9me3	H3K9me3-1#11_4	469397775	83198	5641.9	82424	71207	57192	86.3911	12.5827	103713	31790	3.491
scNanoSeq-CUT&Tag	H3K9me3	H3K9me3-1#11_5	37871208	6717	5638.1	6434	5434	4393	84.4576	0.958254	7816	4476	1.681
scNanoSeq-CUT&Tag	H3K9me3	H3K9me3-1#11_6	224922515	39449	5701.6	38604	32417	25834	83.9732	5.77712	46125	18338	3.35
scNanoSeq-CUT&Tag	H3K9me3	H3K9me3-1#11_7	109193691	20572	5307.9	19117	15682	12885	82.0317	2.62067	22266	10426	3.728
scNanoSeq-CUT&Tag	H3K9me3	H3K9me3-1#11_8	250477501	46090	5434.5	45418	38057	30481	83.7928	6.46766	54352	20032	1.939
scNanoSeq-CUT&Tag	H3K9me3	H3K9me3-1#11_9	259460084	46800	5544	45688	38238	29722	83.6937	6.61988	52926	19940	2.649
scNanoSeq-CUT&Tag	H3K9me3	H3K9me3-1#12_1	412319502	77332	5331.8	76180	64137	51457	84.1914	10.705	93042	27888	2.24
scNanoSeq-CUT&Tag	H3K9me3	H3K9me3-1#12_10	25131501	4565	5505.3	4377	3703	3062	84.6013	0.625464	5409	2547	4.479
scNanoSeq-CUT&Tag	H3K9me3	H3K9me3-1#12_11	137132336	25868	5301.2	25377	21372	17569	84.218	3.53814	31502	12105	3.14
scNanoSeq-CUT&Tag	H3K9me3	H3K9me3-1#12_2	276963297	48040	5765.3	47330	39740	32633	83.9637	7.20718	58338	17497	3.221
scNanoSeq-CUT&Tag	H3K9me3	H3K9me3-1#12_3	300256007	55148	5444.5	52998	43841	35607	82.722	7.63777	63695	21494	2.655
scNanoSeq-CUT&Tag	H3K9me3	H3K9me3-1#12_4	172497768	30455	5664	30070	25232	20786	83.9109	4.46549	37285	12648	3.385
scNanoSeq-CUT&Tag	H3K9me3	H3K9me3-1#12_5	76156371	13714	5553.2	13543	12003	9856	88.6288	2.07931	17901	7634	2.884
scNanoSeq-CUT&Tag	H3K9me3	H3K9me3-1#12_6	117827291	21061	5594.6	20654	18080	14639	87.5375	3.14946	26364	11305	4.442
scNanoSeq-CUT&Tag	H3K9me3	H3K9me3-1#12_7	44770053	8565	5227.1	7860	6534	5445	83.1298	1.07328	9363	4578	2.139
scNanoSeq-CUT&Tag	H3K9me3	H3K9me3-1#12_9	383705048	70752	5423.2	69616	58780	47054	84.4346	9.95794	84210	29285	2.805
scNanoSeq-CUT&Tag	H3K9me3	H3K9me3-1#13_1	323832372	57428	5638.9	56465	48079	37802	85.1483	8.48551	67846	24591	3.168
scNanoSeq-CUT&Tag	H3K9me3	H3K9me3-1#13_10	205054699	37022	5538.7	36423	30380	23701	83.4088	5.25371	42562	17529	3.661
scNanoSeq-CUT&Tag	H3K9me3	H3K9me3-1#13_11	378856737	67306	5628.9	66343	57337	45120	86.4251	10.0917	81606	28526	3.551
scNanoSeq-CUT&Tag	H3K9me3	H3K9me3-1#13_12	483729825	83916	5764.5	82900	70993	55840	85.6369	12.8418	101007	29566	2.516
scNanoSeq-CUT&Tag	H3K9me3	H3K9me3-1#13_2	164317124	28562	5753	27959	21750	17617	77.7925	3.88608	31077	13981	3.19
scNanoSeq-CUT&Tag	H3K9me3	H3K9me3-1#13_3	73642840	11309	6511.9	11003	9052	8342	82.2685	1.84286	14576	5193	3.093
scNanoSeq-CUT&Tag	H3K9me3	H3K9me3-1#13_4	194108836	33634	5771.2	33247	28714	23149	86.3657	5.18951	42033	16123	2.322
scNanoSeq-CUT&Tag	H3K9me3	H3K9me3-1#13_5	165964897	32577	5094.5	32259	27576	22688	85.4831	4.36437	41365	14635	2.775
scNanoSeq-CUT&Tag	H3K9me3	H3K9me3-1#13_6	119259701	20912	5702.9	20391	17001	13687	83.375	3.02013	24328	10776	3.484
scNanoSeq-CUT&Tag	H3K9me3	H3K9me3-1#13_7	569553206	102776	5541.7	100808	84076	66148	83.4021	14.6185	117897	36111	2.508
scNanoSeq-CUT&Tag	H3K9me3	H3K9me3-1#13_8	105650695	18755	5633.2	18419	16076	12815	87.2794	2.82849	23028	9412	2.631
scNanoSeq-CUT&Tag	H3K9me3	H3K9me3-1#13_9	241223179	43304	5570.5	42352	36324	28337	85.7669	6.32735	50537	20000	2.634
scNanoSeq-CUT&Tag	H3K9me3	H3K9me3-1#14_1	72801553	13766	5288.5	13242	11590	9251	87.5245	1.91734	16802	8929	2.843
scNanoSeq-CUT&Tag	H3K9me3	H3K9me3-1#14_10	589353478	104333	5648.8	103314	86022	67061	83.2627	15.2232	120295	40712	3.014
scNanoSeq-CUT&Tag	H3K9me3	H3K9me3-1#14_11	46759287	8244	5671.9	7997	6835	5422	85.4696	1.2112	9378	4127	1.531
scNanoSeq-CUT&Tag	H3K9me3	H3K9me3-1#14_12	27984694	4892	5720.5	4705	4019	3229	85.4198	0.720757	5677	3157	2.189
scNanoSeq-CUT&Tag	H3K9me3	H3K9me3-1#14_2	182306720	31810	5731.1	31263	25919	20817	82.9063	4.66275	36580	16723	2.056
scNanoSeq-CUT&Tag	H3K9me3	H3K9me3-1#14_4	98715969	17167	5750.3	16920	13710	11115	81.0284	2.46359	19873	9204	3.072
scNanoSeq-CUT&Tag	H3K9me3	H3K9me3-1#14_5	199102956	34871	5709.7	34329	28561	22893	83.1979	5.10995	40767	15362	2.956
scNanoSeq-CUT&Tag	H3K9me3	H3K9me3-1#14_6	64178334	11294	5682.5	10953	9775	7874	89.245	1.75206	14081	7408	1.956
scNanoSeq-CUT&Tag	H3K9me3	H3K9me3-1#14_7	163345491	30156	5416.7	28630	24288	19262	84.8341	4.23716	34318	15861	3.541
scNanoSeq-CUT&Tag	H3K9me3	H3K9me3-1#14_8	43611547	8262	5278.6	8019	6699	5314	83.5391	1.10681	9569	4946	2.987
scNanoSeq-CUT&Tag	H3K9me3	H3K9me3-1#14_9	216712778	39559	5478.2	38451	34071	26925	88.6089	5.8905	48407	18693	3.083
scNanoSeq-CUT&Tag	H3K9me3	H3K9me3-1#15_1	144886298	26538	5459.6	24988	21540	17129	86.2014	3.80567	30699	13625	3.549
scNanoSeq-CUT&Tag	H3K9me3	H3K9me3-1#15_10	210060708	38247	5492.2	37338	31388	24335	84.0645	5.40866	43616	15183	3.046
scNanoSeq-CUT&Tag	H3K9me3	H3K9me3-1#15_11	189758228	34863	5443	33830	26596	21141	78.6166	4.52775	36840	14534	3.214
scNanoSeq-CUT&Tag	H3K9me3	H3K9me3-1#15_12	224146873	39522	5671.4	38201	31256	24904	81.8198	5.60425	44516	18132	2.961
scNanoSeq-CUT&Tag	H3K9me3	H3K9me3-1#15_3	36099390	6768	5333.8	5974	5011	4210	83.8801	0.903688	7267	3641	3.051
scNanoSeq-CUT&Tag	H3K9me3	H3K9me3-1#15_4	276721190	52006	5320.9	50555	42375	34811	83.8196	7.13934	62735	22224	1.682
scNanoSeq-CUT&Tag	H3K9me3	H3K9me3-1#15_5	194991882	34735	5613.7	33652	29205	23438	86.7853	5.21112	42130	17546	3.61
scNanoSeq-CUT&Tag	H3K9me3	H3K9me3-1#15_6	301501029	52299	5764.9	50917	42482	34039	83.4338	7.72408	60918	18807	3.056
scNanoSeq-CUT&Tag	H3K9me3	H3K9me3-1#15_7	1336728750	2418712	552.7	22600	19047	17579	84.2788	2.90239	25435	7899	4.226
scNanoSeq-CUT&Tag	H3K9me3	H3K9me3-1#15_8	221566559	39133	5661.9	38162	33064	26048	86.6412	5.89304	46546	18132	3.316
scNanoSeq-CUT&Tag	H3K9me3	H3K9me3-1#15_9	309396067	57942	5339.8	55574	45980	36228	82.7365	7.7732	64439	25353	2.582
scNanoSeq-CUT&Tag	H3K9me3	H3K9me3-1#16_1	201825349	36546	5522.5	35609	30039	23741	84.3579	5.19582	42659	17036	3.517
scNanoSeq-CUT&Tag	H3K9me3	H3K9me3-1#16_10	346678103	61213	5663.5	60408	50543	40021	83.6694	8.95869	72167	22380	3.234
scNanoSeq-CUT&Tag	H3K9me3	H3K9me3-1#16_11	209098916	37537	5570.5	36946	31409	25255	85.0133	5.47779	45334	18995	3.201
scNanoSeq-CUT&Tag	H3K9me3	H3K9me3-1#16_12	275320222	48817	5639.8	48104	40566	33064	84.3298	7.14171	59683	20177	2.807
scNanoSeq-CUT&Tag	H3K9me3	H3K9me3-1#16_2	251439039	44902	5599.7	44198	37579	30359	85.0242	6.60025	54796	17146	2.235
scNanoSeq-CUT&Tag	H3K9me3	H3K9me3-1#16_3	487310097	86637	5624.7	85487	72764	57496	85.117	12.8389	103015	33029	3.184
scNanoSeq-CUT&Tag	H3K9me3	H3K9me3-1#16_4	109130439	18898	5774.7	18601	15779	12793	84.8288	2.8287	23208	10192	3.007
scNanoSeq-CUT&Tag	H3K9me3	H3K9me3-1#16_5	194214781	37173	5224.6	36468	28041	22587	76.8921	4.54872	40591	17489	2.051
scNanoSeq-CUT&Tag	H3K9me3	H3K9me3-1#16_6	66057488	11815	5591	11475	9376	7519	81.7081	1.61978	13374	6042	2.927
scNanoSeq-CUT&Tag	H3K9me3	H3K9me3-1#16_7	298590522	54281	5500.8	53015	41570	33079	78.4118	7.11563	58127	23640	2.693
scNanoSeq-CUT&Tag	H3K9me3	H3K9me3-1#16_8	631004047	112530	5607.4	111339	100263	80285	90.052	17.638	146406	42105	3.039
scNanoSeq-CUT&Tag	H3K9me3	H3K9me3-1#16_9	223448839	41235	5418.9	39918	33298	26320	83.416	5.62991	46783	17940	3.29
scNanoSeq-CUT&Tag	H3K9me3	H3K9me3-1#9_1	309947263	59779	5184.9	58724	49814	39504	84.8273	8.05251	70975	25038	1.763
scNanoSeq-CUT&Tag	H3K9me3	H3K9me3-1#9_10	221246888	40124	5514.1	39518	32482	25657	82.1955	5.59013	46194	15654	2.977
scNanoSeq-CUT&Tag	H3K9me3	H3K9me3-1#9_11	366239324	67883	5395.2	66958	56941	45256	85.0399	9.62816	81392	26159	2.36
scNanoSeq-CUT&Tag	H3K9me3	H3K9me3-1#9_12	272598513	49542	5502.4	48746	39176	31553	80.3676	6.7453	56726	22108	2.582
scNanoSeq-CUT&Tag	H3K9me3	H3K9me3-1#9_2	216970638	41169	5270.2	40516	34817	29325	85.934	5.70753	52771	19278	1.574
scNanoSeq-CUT&Tag	H3K9me3	H3K9me3-1#9_3	130169053	23780	5473.9	23288	19379	15804	83.2145	3.31253	28219	12356	3.884
scNanoSeq-CUT&Tag	H3K9me3	H3K9me3-1#9_4	308106550	53909	5715.3	53358	43792	35540	82.072	7.83577	63897	21972	2.871
scNanoSeq-CUT&Tag	H3K9me3	H3K9me3-1#9_5	117632507	21525	5464.9	21151	17495	14037	82.7148	2.97345	25311	9686	4.528
scNanoSeq-CUT&Tag	H3K9me3	H3K9me3-1#9_6	42346619	7845	5397.9	7561	6471	5377	85.5839	1.07832	9550	4770	2.959
scNanoSeq-CUT&Tag	H3K9me3	H3K9me3-1#9_7	221843383	41555	5338.5	40457	33577	27075	82.9943	5.60444	47915	16721	2.304
scNanoSeq-CUT&Tag	H3K9me3	H3K9me3-1#9_8	296270273	53207	5568.3	52483	43837	34878	83.5261	7.62366	62592	23118	3.23
scNanoSeq-CUT&Tag	H3K9me3	H3K9me3-1#9_9	330088532	60593	5447.6	59482	50805	39805	85.4124	8.65388	71188	24126	2.809

## Sheet: scNanoATAC-seq
Table S3. Quality control of scNanoATAC-seq data of individual cells of human cell line GM12878.
Technique	Modality	Cell ID	Data size (bp)	Barcoded reads	Avg. read length (bp)	Reads with adapters	Mapped reads	Unique reads	Mapping ratio (%)	Coverage	I7 fragments	I7 FRIP	I7 TSS
scNanoATAC-seq	ATAC	ATAC-1#1_1	24005722	5755	4171.3	5328	5181	5179	97.241	0.667737	9173	993	3.223
scNanoATAC-seq	ATAC	ATAC-1#1_10	514414151	117492	4378.3	112722	109735	102417	97.3501	14.7952	185963	17955	3.22
scNanoATAC-seq	ATAC	ATAC-1#1_11	183644572	43304	4240.8	41122	40073	37753	97.4491	5.24462	67411	7903	3.112
scNanoATAC-seq	ATAC	ATAC-1#1_2	285023134	68341	4170.6	64850	62868	58786	96.9437	8.07382	104534	11894	3.715
scNanoATAC-seq	ATAC	ATAC-1#1_3	95231688	31524	3020.9	29558	28572	28193	96.6642	2.59881	49590	5283	2.77
scNanoATAC-seq	ATAC	ATAC-1#1_4	323226885	76360	4232.9	71661	70303	66701	98.105	9.27938	116956	12553	3.043
scNanoATAC-seq	ATAC	ATAC-1#1_6	600262723	141816	4232.7	135894	132384	123697	97.4171	17.2358	224983	26168	3.28
scNanoATAC-seq	ATAC	ATAC-1#1_7	28621770	7425	3854.8	6330	6155	6139	97.2354	0.785041	10902	1156	3.678
scNanoATAC-seq	ATAC	ATAC-1#1_8	295582887	69219	4270.3	66448	64847	60013	97.5906	8.528	108986	11815	3.699
scNanoATAC-seq	ATAC	ATAC-1#1_9	1134374065	270680	4190.8	258570	252089	234002	97.4935	32.5365	423350	45094	2.972
scNanoATAC-seq	ATAC	ATAC-1#2_1	18248896	4151	4396.3	3861	3730	3712	96.6071	0.513968	6474	651	3.04
scNanoATAC-seq	ATAC	ATAC-1#2_10	39905854	9656	4132.8	9206	8834	8362	95.9592	1.12767	15034	1598	3.179
scNanoATAC-seq	ATAC	ATAC-1#2_11	17995252	4158	4327.9	3870	3668	3491	94.7804	0.493177	6187	635	3.839
scNanoATAC-seq	ATAC	ATAC-1#2_12	1626653866	361218	4503.2	348481	339038	308753	97.2902	47.2449	566107	60317	3.371
scNanoATAC-seq	ATAC	ATAC-1#2_2	348033326	79141	4397.6	76003	74644	68253	98.2119	10.1175	123053	14962	4.006
scNanoATAC-seq	ATAC	ATAC-1#2_3	44831310	13868	3232.7	13104	12651	12401	96.543	1.2363	21909	2243	2.962
scNanoATAC-seq	ATAC	ATAC-1#2_4	397466418	93312	4259.5	88686	86020	79787	96.9939	11.3888	141611	12878	2.814
scNanoATAC-seq	ATAC	ATAC-1#2_5	334612687	74339	4501.2	71650	69223	63537	96.6127	9.61429	115086	12239	3.257
scNanoATAC-seq	ATAC	ATAC-1#2_6	436609676	99402	4392.4	95846	93432	84879	97.4814	12.6707	155296	17065	3.283
scNanoATAC-seq	ATAC	ATAC-1#2_7	60730666	13797	4401.7	13063	12758	11954	97.6652	1.75406	21529	2315	3.264
scNanoATAC-seq	ATAC	ATAC-1#2_8	191372995	44297	4320.2	42750	41942	38021	98.1099	5.58377	69603	9502	3.672
scNanoATAC-seq	ATAC	ATAC-1#2_9	1100067658	250000	4400.3	240615	234013	211607	97.2562	31.7864	385992	34600	2.872
scNanoATAC-seq	ATAC	ATAC-1#3_1	227068781	56969	3985.8	54012	52345	49745	96.9136	6.36535	88297	9476	3.499
scNanoATAC-seq	ATAC	ATAC-1#3_10	1033997040	230751	4481	222100	216940	203251	97.6767	29.8316	371376	42613	3.532
scNanoATAC-seq	ATAC	ATAC-1#3_11	242229977	53939	4490.8	51452	49988	47179	97.1546	6.92197	85264	8559	3.103
scNanoATAC-seq	ATAC	ATAC-1#3_12	494608491	111249	4446	106514	103433	97403	97.1074	14.1609	177658	19046	3.298
scNanoATAC-seq	ATAC	ATAC-1#3_2	333932300	75751	4408.3	72168	70751	66768	98.0365	9.56647	119836	13738	3.717
scNanoATAC-seq	ATAC	ATAC-1#3_3	24188071	6995	3457.9	6564	6304	6229	96.039	0.657659	11027	1130	2.551
scNanoATAC-seq	ATAC	ATAC-1#3_4	367453615	86572	4244.5	81807	79441	75834	97.1078	10.413	133473	10974	2.763
scNanoATAC-seq	ATAC	ATAC-1#3_5	409235053	94153	4346.5	90342	88142	82987	97.5648	11.7543	150338	17311	3.65
scNanoATAC-seq	ATAC	ATAC-1#3_7	367901447	85142	4321	81108	78335	74046	96.5811	10.4216	133620	12720	2.879
scNanoATAC-seq	ATAC	ATAC-1#3_8	217493469	50180	4334.3	48109	46580	43889	96.8218	6.19576	80041	6918	2.729
scNanoATAC-seq	ATAC	ATAC-1#3_9	238370207	54220	4396.4	51816	49760	46860	96.0321	6.75081	85081	10209	3.967
scNanoATAC-seq	ATAC	ATAC-1#4_1	319004629	80982	3939.2	76470	74266	71847	97.1178	9.00102	126025	12605	2.891
scNanoATAC-seq	ATAC	ATAC-1#4_10	354900296	79349	4472.6	76257	74243	70289	97.3589	10.2314	127264	12963	3.15
scNanoATAC-seq	ATAC	ATAC-1#4_11	140040199	32608	4294.7	31008	30246	29027	97.5426	4.02016	51827	5844	3.189
scNanoATAC-seq	ATAC	ATAC-1#4_12	287085548	64675	4438.9	61749	59784	57197	96.8178	8.2139	103395	9395	2.818
scNanoATAC-seq	ATAC	ATAC-1#4_2	493773500	113848	4337.1	108320	105382	100608	97.2877	14.1064	179546	17677	2.957
scNanoATAC-seq	ATAC	ATAC-1#4_4	121405669	29255	4149.9	26916	25886	25102	96.1733	3.40408	43696	4423	3.968
scNanoATAC-seq	ATAC	ATAC-1#4_6	167908113	40122	4184.9	38252	37216	35946	97.2916	4.79244	64758	6272	3.07
scNanoATAC-seq	ATAC	ATAC-1#4_7	677860580	156348	4335.6	148769	143563	137413	96.5006	19.3089	245644	25139	3.637
scNanoATAC-seq	ATAC	ATAC-1#4_8	115960154	27576	4205.1	26293	25476	24491	96.8927	3.31083	44006	4642	3.159
scNanoATAC-seq	ATAC	ATAC-1#4_9	327202217	73398	4457.9	70056	68050	64944	97.1366	9.39444	117084	11804	3.749
scNanoATAC-seq	ATAC	ATAC-1#5_1	287110875	70752	4058	67205	66013	61175	98.2263	8.25752	108846	15518	3.671
scNanoATAC-seq	ATAC	ATAC-1#5_10	526622135	117714	4473.7	113248	109874	99050	97.0207	15.1881	180831	18931	3.23
scNanoATAC-seq	ATAC	ATAC-1#5_11	416445889	92633	4495.7	88481	86322	78780	97.5599	12.0382	141635	14354	3.013
scNanoATAC-seq	ATAC	ATAC-1#5_12	872222575	198583	4392.2	190682	185921	168418	97.5032	25.2631	307287	31481	2.795
scNanoATAC-seq	ATAC	ATAC-1#5_2	434456477	95775	4536.2	91353	89473	81104	97.942	12.5783	145305	19113	4.373
scNanoATAC-seq	ATAC	ATAC-1#5_3	144696184	45365	3189.6	42953	41625	40385	96.9082	3.99096	71837	6906	2.302
scNanoATAC-seq	ATAC	ATAC-1#5_4	884180129	202958	4356.5	192602	186727	172414	96.9497	25.3073	303804	29719	3.663
scNanoATAC-seq	ATAC	ATAC-1#5_6	425973326	94437	4510.7	90514	88714	79966	98.0114	12.4051	145955	19682	4.031
scNanoATAC-seq	ATAC	ATAC-1#5_7	528402820	119102	4436.6	113621	109489	99987	96.3633	15.0815	180096	20571	3.522
scNanoATAC-seq	ATAC	ATAC-1#5_8	655815319	152129	4310.9	146092	142892	129918	97.8096	19.0379	237015	27423	3.552
scNanoATAC-seq	ATAC	ATAC-1#5_9	67587299	16422	4115.7	15302	14898	13863	97.3598	1.92588	24957	2887	3.379
scNanoATAC-seq	ATAC	ATAC-1#6_10	441578559	98043	4503.9	94417	92286	84552	97.743	12.7811	154060	16822	3.031
scNanoATAC-seq	ATAC	ATAC-1#6_11	291003395	64579	4506.2	61855	60599	56066	97.9694	8.45203	101465	11141	3.189
scNanoATAC-seq	ATAC	ATAC-1#6_12	661577139	149476	4426	143500	139400	128504	97.1429	19.0608	234096	23949	3.222
scNanoATAC-seq	ATAC	ATAC-1#6_2	15311656	3638	4208.8	3300	3223	3223	97.6667	0.416556	5374	527	3.516
scNanoATAC-seq	ATAC	ATAC-1#6_4	378489727	88996	4252.9	84069	80829	75777	96.146	10.6808	132914	12600	4.61
scNanoATAC-seq	ATAC	ATAC-1#6_5	394796912	88271	4472.6	84620	81820	75516	96.6911	11.3247	136650	16495	3.695
scNanoATAC-seq	ATAC	ATAC-1#6_6	431113073	99847	4317.7	94988	91197	83937	96.009	12.2189	152719	13488	3.108
scNanoATAC-seq	ATAC	ATAC-1#6_7	506955586	119109	4256.2	112255	109793	101269	97.8068	14.599	183156	22500	3.359
scNanoATAC-seq	ATAC	ATAC-1#6_8	644080177	150195	4288.3	144431	140400	129836	97.209	18.5035	236867	21678	2.977
scNanoATAC-seq	ATAC	ATAC-1#6_9	415713108	94892	4380.9	89809	87117	79508	97.0025	11.8802	144269	12964	2.98
scNanoATAC-seq	ATAC	ATAC-1#7_1	201636035	49261	4093.2	46875	45351	42888	96.7488	5.71145	76081	7980	3.535
scNanoATAC-seq	ATAC	ATAC-1#7_10	411566502	88860	4631.6	85833	83497	76780	97.2784	11.9295	140126	14160	3.232
scNanoATAC-seq	ATAC	ATAC-1#7_11	187847670	41777	4496.4	39948	38993	36338	97.6094	5.43519	65607	7913	3.633
scNanoATAC-seq	ATAC	ATAC-1#7_12	205446892	45884	4477.5	44143	43159	40182	97.7709	5.98493	73378	8418	3.336
scNanoATAC-seq	ATAC	ATAC-1#7_2	272943224	62084	4396.4	59336	57602	53630	97.0777	7.82273	96194	12198	4.033
scNanoATAC-seq	ATAC	ATAC-1#7_3	52168075	16238	3212.7	15346	15012	14723	97.8235	1.45549	26138	2648	2.599
scNanoATAC-seq	ATAC	ATAC-1#7_4	582893438	134816	4323.6	128062	124627	117746	97.3177	16.7087	207753	22149	3.438
scNanoATAC-seq	ATAC	ATAC-1#7_5	556787722	122779	4534.9	118118	115270	107551	97.5889	16.2101	194738	21963	3.809
scNanoATAC-seq	ATAC	ATAC-1#7_6	316176668	69179	4570.4	66614	65065	60188	97.6747	9.19361	109915	11082	3.246
scNanoATAC-seq	ATAC	ATAC-1#7_7	487234846	109242	4460.1	104416	101113	93851	96.8367	14.0015	169278	15872	3.442
scNanoATAC-seq	ATAC	ATAC-1#7_8	661194014	149557	4421	144014	140252	130209	97.3878	19.1376	237793	24009	2.873
scNanoATAC-seq	ATAC	ATAC-1#7_9	156986504	35644	4404.3	33571	32920	30434	98.0608	4.55221	55188	7869	3.582
scNanoATAC-seq	ATAC	ATAC-1#8_10	223523243	52171	4284.4	49545	48212	46012	97.3095	6.40979	82556	8129	3.15
scNanoATAC-seq	ATAC	ATAC-1#8_11	205261410	47421	4328.5	44871	43720	41848	97.4349	5.90644	74818	7955	3.475
scNanoATAC-seq	ATAC	ATAC-1#8_12	161792714	44179	3662.2	41324	40114	38890	97.0719	4.55106	69459	7121	3.625
scNanoATAC-seq	ATAC	ATAC-1#8_2	329403562	76006	4333.9	71893	69857	66233	97.168	9.42207	117506	12173	3.766
scNanoATAC-seq	ATAC	ATAC-1#8_3	17759243	5025	3534.2	4488	4360	4348	97.148	0.486121	7546	758	2.758
scNanoATAC-seq	ATAC	ATAC-1#8_4	349578780	84678	4128.3	78673	76511	73908	97.2519	9.94016	128666	12194	3.543
scNanoATAC-seq	ATAC	ATAC-1#8_5	27114255	7620	3558.3	6694	6458	6450	96.4745	0.746125	10970	1053	4.706
scNanoATAC-seq	ATAC	ATAC-1#8_6	323040330	77295	4179.3	72227	70401	67050	97.4719	9.27248	121291	14833	3.098
scNanoATAC-seq	ATAC	ATAC-1#8_7	407219816	96150	4235.3	90417	87463	83383	96.7329	11.5791	148785	13657	2.826
scNanoATAC-seq	ATAC	ATAC-1#8_8	344200079	77521	4440.1	73783	71697	67799	97.1728	9.91586	122389	11791	3.201

## Sheet: LUAD
Table S4. Quality control of scNanoCT&ATAC-seq data of individual cells of lung cancer samples.
Technique	Modality I5	Modality I7	Cell ID	Data size (bp)	Barcoded reads	Avg. read length (bp)	Reads with adapters	Mapped reads	Unique reads	Mapping ratio (%)	Coverage	I5 fragments	I5 TSS	I7 fragments	I7 TSS	Cell type
scNanoCT&ATAC-seq	H3K9me3	ATAC	WMX-H3K9me3-CA-1#1_10	106695990	18686	5709.9	18247	16473	15480	90.2779	2.97283	9044	2.524	19529	5.742	Endothelial cells
scNanoCT&ATAC-seq	H3K9me3	ATAC	WMX-H3K9me3-CA-1#1_11	211200369	37342	5655.8	36675	32534	30641	88.7089	5.82293	18853	2.475	37766	5.837	Fibroblasts
scNanoCT&ATAC-seq	H3K9me3	ATAC	WMX-H3K9me3-CA-1#1_2	253408247	57143	4434.6	47423	43388	40910	91.4915	7.07494	22332	2.308	53517	4.452	Fibroblasts
scNanoCT&ATAC-seq	H3K9me3	ATAC	WMX-H3K9me3-CA-1#1_3	52075190	13491	3860	13120	11676	11344	88.9939	1.38297	5658	2.037	15322	4.088	Epithelial cells(Tumor1)
scNanoCT&ATAC-seq	H3K9me3	ATAC	WMX-H3K9me3-CA-1#1_4	53960679	9342	5776.1	9090	7969	7521	87.6678	1.4518	5501	2.074	8222	4.151	Epithelial cells(Tumor2)
scNanoCT&ATAC-seq	H3K9me3	ATAC	WMX-H3K9me3-CA-1#1_6	314195778	65275	4813.4	55439	49290	46243	88.9085	8.62477	24022	1.677	60616	4.549	Epithelial cells(Tumor1)
scNanoCT&ATAC-seq	H3K9me3	ATAC	WMX-H3K9me3-CA-1#1_7	337583798	65071	5187.9	60016	51799	48601	86.3087	9.07905	30737	2.337	57768	4.309	Epithelial cells(Tumor1)
scNanoCT&ATAC-seq	H3K9me3	ATAC	WMX-H3K9me3-CA-1#1_8	268492773	51197	5244.3	49478	44471	41799	89.8804	7.50957	23050	2.692	54592	4.263	Epithelial cells(Tumor1)
scNanoCT&ATAC-seq	H3K9me3	ATAC	WMX-H3K9me3-CA-1#1_9	109739453	21639	5071.4	18104	15483	14583	85.5225	2.87576	9865	3.491	16750	6.81	Epithelial cells(Normal)
scNanoCT&ATAC-seq	H3K9me3	ATAC	WMX-H3K9me3-CA-1#2_1	236669661	41493	5703.8	40724	36177	34182	88.8346	6.49101	16644	2.58	45945	4.562	Epithelial cells(Tumor1)
scNanoCT&ATAC-seq	H3K9me3	ATAC	WMX-H3K9me3-CA-1#2_10	186710810	32276	5784.8	31156	27722	26186	88.978	5.14788	14360	2.222	33648	5.501	Fibroblasts
scNanoCT&ATAC-seq	H3K9me3	ATAC	WMX-H3K9me3-CA-1#2_11	172211145	30149	5712	29220	26748	25309	91.54	4.87361	11821	4.271	34816	4.87	Fibroblasts
scNanoCT&ATAC-seq	H3K9me3	ATAC	WMX-H3K9me3-CA-1#2_12	353493902	61275	5769	60267	53728	50467	89.1499	9.884	40788	2.99	52403	5.318	Endothelial cells
scNanoCT&ATAC-seq	H3K9me3	ATAC	WMX-H3K9me3-CA-1#2_2	150480594	40274	3736.4	25010	22694	21483	90.7397	4.06054	13164	4.11	26170	5.652	Endothelial cells
scNanoCT&ATAC-seq	H3K9me3	ATAC	WMX-H3K9me3-CA-1#2_3	84535553	16622	5085.8	16137	14552	13927	90.1779	2.30655	8569	4.534	16965	5.476	Fibroblasts
scNanoCT&ATAC-seq	H3K9me3	ATAC	WMX-H3K9me3-CA-1#2_4	53735508	8815	6095.9	8542	7533	7174	88.1878	1.44466	4246	2.546	8883	5.81	Endothelial cells
scNanoCT&ATAC-seq	H3K9me3	ATAC	WMX-H3K9me3-CA-1#2_5	101469570	21993	4613.7	21430	18566	17589	86.6356	2.67662	11372	1.645	21051	4.276	Epithelial cells(Tumor2)
scNanoCT&ATAC-seq	H3K9me3	ATAC	WMX-H3K9me3-CA-1#2_6	276617902	91558	3021.2	46649	39597	37536	84.8828	7.0499	20425	2.364	48247	4.975	Epithelial cells(Tumor1)
scNanoCT&ATAC-seq	H3K9me3	ATAC	WMX-H3K9me3-CA-1#2_8	271663427	63114	4304.3	47023	41503	39210	88.2611	7.38129	14885	3.012	56890	4.201	Epithelial cells(Tumor1)
scNanoCT&ATAC-seq	H3K9me3	ATAC	WMX-H3K9me3-CA-1#2_9	302226086	72356	4176.9	54758	47572	44690	86.8768	8.06491	26517	2.021	55465	5.503	Epithelial cells(Tumor2)
scNanoCT&ATAC-seq	H3K9me3	ATAC	WMX-H3K9me3-CA-1#3_1	137978915	23963	5758	23418	21711	20674	92.7107	3.94851	7525	1.8	30697	5.453	Fibroblasts
scNanoCT&ATAC-seq	H3K9me3	ATAC	WMX-H3K9me3-CA-1#3_10	139313740	23362	5963.3	22270	20669	19696	92.811	4.00553	5141	2.397	30727	5.868	Endothelial cells
scNanoCT&ATAC-seq	H3K9me3	ATAC	WMX-H3K9me3-CA-1#3_12	172039414	29942	5745.8	29005	26313	25073	90.7188	4.87829	9230	3.96	36635	5.201	Epithelial cells(Tumor1)
scNanoCT&ATAC-seq	H3K9me3	ATAC	WMX-H3K9me3-CA-1#3_2	283354499	51137	5541.1	47924	43835	41754	91.4677	8.01408	18777	2.094	57108	4.938	Epithelial cells(Tumor2)
scNanoCT&ATAC-seq	H3K9me3	ATAC	WMX-H3K9me3-CA-1#3_4	131711839	22540	5843.5	22078	20353	19543	92.1868	3.77201	8395	2.397	27409	4.994	Endothelial cells
scNanoCT&ATAC-seq	H3K9me3	ATAC	WMX-H3K9me3-CA-1#3_5	204772851	44311	4621.3	33720	29635	28247	87.8855	5.59672	9493	4.697	41861	5.503	Epithelial cells(Tumor2)
scNanoCT&ATAC-seq	H3K9me3	ATAC	WMX-H3K9me3-CA-1#3_6	203104592	121180	1676.1	35590	26146	24980	73.4645	4.31658	12153	1.159	33038	4.177	Epithelial cells(Tumor2)
scNanoCT&ATAC-seq	H3K9me3	ATAC	WMX-H3K9me3-CA-1#3_7	488625482	117169	4170.3	91975	80827	76574	87.8793	13.234	46643	2.375	94688	4.803	Fibroblasts
scNanoCT&ATAC-seq	H3K9me3	ATAC	WMX-H3K9me3-CA-1#3_8	118739370	48722	2437.1	19471	16696	15949	85.748	3.01829	6090	5.211	23157	5.439	Endothelial cells
scNanoCT&ATAC-seq	H3K9me3	ATAC	WMX-H3K9me3-CA-1#3_9	90340741	49825	1813.2	15051	11687	11126	77.6493	1.9518	10359	2.293	9862	4.611	Endothelial cells
scNanoCT&ATAC-seq	H3K9me3	ATAC	WMX-H3K9me3-CA-1#4_1	286107370	49714	5755.1	48870	44311	41940	90.6712	8.0934	28450	1.783	48691	4.344	Epithelial cells(Tumor1)
scNanoCT&ATAC-seq	H3K9me3	ATAC	WMX-H3K9me3-CA-1#4_10	190497101	36902	5162.2	35849	30929	29183	86.2758	5.10542	32960	3.786	20982	5.027	Fibroblasts
scNanoCT&ATAC-seq	H3K9me3	ATAC	WMX-H3K9me3-CA-1#4_11	178073662	38714	4599.7	29466	27153	25940	92.1503	5.08521	5853	2.145	41896	4.825	Epithelial cells(Tumor2)
scNanoCT&ATAC-seq	H3K9me3	ATAC	WMX-H3K9me3-CA-1#4_12	202509194	35710	5670.9	34777	31662	29889	91.0429	5.76304	17936	2.706	37275	5.535	Fibroblasts
scNanoCT&ATAC-seq	H3K9me3	ATAC	WMX-H3K9me3-CA-1#4_2	134202840	49923	2688.2	22494	19062	18045	84.7426	3.41899	8137	2.241	24888	6.017	Fibroblasts
scNanoCT&ATAC-seq	H3K9me3	ATAC	WMX-H3K9me3-CA-1#4_3	105151259	20608	5102.4	20084	18209	17527	90.6642	2.94176	6033	3.055	25865	4.9	Epithelial cells(Tumor1)
scNanoCT&ATAC-seq	H3K9me3	ATAC	WMX-H3K9me3-CA-1#4_4	74020730	12341	5998	12012	11015	10552	91.7	2.10811	3830	5.842	15432	6.628	Fibroblasts
scNanoCT&ATAC-seq	H3K9me3	ATAC	WMX-H3K9me3-CA-1#4_5	203803108	33795	6030.6	32755	29515	28110	90.1084	5.76428	9695	3.178	41580	5.199	Epithelial cells(Tumor1)
scNanoCT&ATAC-seq	H3K9me3	ATAC	WMX-H3K9me3-CA-1#4_6	167554676	158739	1055.5	28100	17638	16865	62.7687	2.93686	7954	2.252	22982	4.989	Fibroblasts
scNanoCT&ATAC-seq	H3K9me3	ATAC	WMX-H3K9me3-CA-1#4_7	123190853	49864	2470.5	21974	18914	18018	86.0745	3.17745	9191	1.201	24083	4.287	Fibroblasts
scNanoCT&ATAC-seq	H3K9me3	ATAC	WMX-H3K9me3-CA-1#4_8	175398904	90616	1935.6	27903	23406	22445	83.8835	4.31263	3038	1.743	37950	6.514	Epithelial cells(Tumor2)
scNanoCT&ATAC-seq	H3K9me3	ATAC	WMX-H3K9me3-CA-1#4_9	58754697	53298	1102.4	9946	7003	6698	70.4102	1.03554	5324	2.88	6714	4.598	Epithelial cells(Tumor2)
scNanoCT&ATAC-seq	H3K9me3	ATAC	WMX-H3K9me3-CA-1#5_1	187059579	31997	5846.2	31270	28580	27064	91.3975	5.27318	9182	1.526	40746	4.927	Fibroblasts
scNanoCT&ATAC-seq	H3K9me3	ATAC	WMX-H3K9me3-CA-1#5_10	127806629	22361	5715.6	20425	18785	17820	91.9706	3.64239	4441	2.669	28086	6.208	Endothelial cells
scNanoCT&ATAC-seq	H3K9me3	ATAC	WMX-H3K9me3-CA-1#5_11	227325569	42703	5323.4	38150	34619	32854	90.7444	6.407	9710	2.601	50736	5.031	Epithelial cells(Tumor1)
scNanoCT&ATAC-seq	H3K9me3	ATAC	WMX-H3K9me3-CA-1#5_12	228612519	37720	6060.8	36973	34350	32492	92.9056	6.64468	8340	2.97	50881	4.792	Epithelial cells(Tumor1)
scNanoCT&ATAC-seq	H3K9me3	ATAC	WMX-H3K9me3-CA-1#5_2	297586975	52117	5710	49794	45734	43131	91.8464	8.46079	11585	1.479	66966	4.425	Epithelial cells(Tumor1)
scNanoCT&ATAC-seq	H3K9me3	ATAC	WMX-H3K9me3-CA-1#5_3	99592269	19669	5063.4	19087	16548	15748	86.6978	2.63478	8965	2.446	19896	5.161	Endothelial cells
scNanoCT&ATAC-seq	H3K9me3	ATAC	WMX-H3K9me3-CA-1#5_4	172332384	28631	6019.1	28032	25553	24341	91.1565	4.91401	9424	3.575	35079	6.217	Epithelial cells(Tumor1)
scNanoCT&ATAC-seq	H3K9me3	ATAC	WMX-H3K9me3-CA-1#5_5	176302994	29240	6029.5	28528	26092	24551	91.461	5.00821	14446	3.265	30815	5.998	Fibroblasts
scNanoCT&ATAC-seq	H3K9me3	ATAC	WMX-H3K9me3-CA-1#5_6	466474267	130562	3572.8	79452	68132	64108	85.7524	12.2825	31089	2.06	86647	4.822	Epithelial cells(Tumor2)
scNanoCT&ATAC-seq	H3K9me3	ATAC	WMX-H3K9me3-CA-1#5_7	209990393	172955	1214.1	34513	24021	22798	69.5999	4.13236	9565	2.417	31984	4.389	Fibroblasts
scNanoCT&ATAC-seq	H3K9me3	ATAC	WMX-H3K9me3-CA-1#5_8	330017821	74600	4423.8	55817	51453	48620	92.1816	9.386	10298	1.873	79080	4.345	Epithelial cells(Tumor1)
scNanoCT&ATAC-seq	H3K9me3	ATAC	WMX-H3K9me3-CA-1#5_9	222118574	99979	2221.7	35171	29790	28264	84.7005	5.54469	8030	2.433	43056	4.647	Epithelial cells(Tumor1)
scNanoCT&ATAC-seq	H3K9me3	ATAC	WMX-H3K9me3-CA-1#6_1	196102067	34505	5683.3	33670	30275	28804	89.9168	5.45927	9304	1.124	43056	5.056	Epithelial cells(Tumor1)
scNanoCT&ATAC-seq	H3K9me3	ATAC	WMX-H3K9me3-CA-1#6_10	153575605	26185	5865	25585	23106	21789	90.3107	4.32942	7742	2.164	31778	4.964	Endothelial cells
scNanoCT&ATAC-seq	H3K9me3	ATAC	WMX-H3K9me3-CA-1#6_11	111134335	19936	5574.6	18795	17383	16507	92.4874	3.17301	5855	3.487	24477	5.683	Fibroblasts
scNanoCT&ATAC-seq	H3K9me3	ATAC	WMX-H3K9me3-CA-1#6_12	203524497	34700	5865.3	33714	30414	28808	90.2118	5.76373	11603	2.143	40896	5.168	Epithelial cells(Tumor2)
scNanoCT&ATAC-seq	H3K9me3	ATAC	WMX-H3K9me3-CA-1#6_2	125228699	23723	5278.8	20607	18199	17295	88.3147	3.3682	6629	2.94	24470	7.098	Epithelial cells(Normal)
scNanoCT&ATAC-seq	H3K9me3	ATAC	WMX-H3K9me3-CA-1#6_3	109938652	22782	4825.7	22218	18500	17537	83.2658	2.78864	15557	3.442	16647	4.75	Fibroblasts
scNanoCT&ATAC-seq	H3K9me3	ATAC	WMX-H3K9me3-CA-1#6_4	58188610	9743	5972.4	9422	8820	8460	93.6107	1.67587	3182	3.819	12197	5.059	Endothelial cells
scNanoCT&ATAC-seq	H3K9me3	ATAC	WMX-H3K9me3-CA-1#6_5	162332784	28135	5769.8	27483	23857	22488	86.8064	4.38418	19245	2.382	21937	6.073	Endothelial cells
scNanoCT&ATAC-seq	H3K9me3	ATAC	WMX-H3K9me3-CA-1#6_6	261240607	254113	1028	45150	29626	28324	65.6168	4.69343	11227	2.275	40808	4.458	Epithelial cells(Tumor1)
scNanoCT&ATAC-seq	H3K9me3	ATAC	WMX-H3K9me3-CA-1#6_7	325987147	175652	1855.9	49902	41673	39357	83.5097	7.61156	17719	3.902	53852	5.163	Epithelial cells(Tumor1)
scNanoCT&ATAC-seq	H3K9me3	ATAC	WMX-H3K9me3-CA-1#6_8	360925910	75833	4759.5	65149	56694	53366	87.0221	9.8003	41613	2.808	56549	4.804	Epithelial cells(Tumor1)
scNanoCT&ATAC-seq	H3K9me3	ATAC	WMX-H3K9me3-CA-1#6_9	184883553	72168	2561.8	29108	26634	25422	91.5006	4.84971	6213	4.547	39884	5.305	Epithelial cells(Tumor1)
scNanoCT&ATAC-seq	H3K9me3	ATAC	WMX-H3K9me3-CA-1#7_1	613436447	122902	4991.3	121322	108633	101962	89.5411	17.1729	89846	1.774	99877	4.696	Epithelial cells(Tumor1)
scNanoCT&ATAC-seq	H3K9me3	ATAC	WMX-H3K9me3-CA-1#7_10	422174735	72436	5828.2	71117	63080	59232	88.6989	11.7459	40078	3.318	68722	5.772	Fibroblasts
scNanoCT&ATAC-seq	H3K9me3	ATAC	WMX-H3K9me3-CA-1#7_11	211877033	36356	5827.8	35602	32609	31103	91.5932	6.04437	8887	1.925	48223	4.289	Epithelial cells(Tumor1)
scNanoCT&ATAC-seq	H3K9me3	ATAC	WMX-H3K9me3-CA-1#7_12	83327840	14090	5914	13671	12200	11601	89.24	2.30566	7889	1.512	13335	4.572	Endothelial cells
scNanoCT&ATAC-seq	H3K9me3	ATAC	WMX-H3K9me3-CA-1#7_2	150317851	26209	5735.4	24431	22162	21014	90.7126	4.19815	7591	2.018	30682	6.342	Fibroblasts
scNanoCT&ATAC-seq	H3K9me3	ATAC	WMX-H3K9me3-CA-1#7_3	106725779	21643	4931.2	21157	18639	17753	88.0985	2.88539	9110	3.065	23596	5.626	Fibroblasts
scNanoCT&ATAC-seq	H3K9me3	ATAC	WMX-H3K9me3-CA-1#7_4	144205337	24146	5972.2	23751	21515	20433	90.5857	4.0885	10896	5.266	26566	5.401	Fibroblasts
scNanoCT&ATAC-seq	H3K9me3	ATAC	WMX-H3K9me3-CA-1#7_5	167020558	28457	5869.2	27802	25562	24195	91.943	4.77406	11219	1.544	33080	5.466	Fibroblasts
scNanoCT&ATAC-seq	H3K9me3	ATAC	WMX-H3K9me3-CA-1#7_6	197925449	65783	3008.8	33375	27719	26314	83.0532	5.0602	14244	1.77	33851	5.527	Fibroblasts
scNanoCT&ATAC-seq	H3K9me3	ATAC	WMX-H3K9me3-CA-1#7_7	109480567	25426	4305.9	17603	15528	14709	88.2122	2.90278	9042	3.371	17296	6.745	Endothelial cells
scNanoCT&ATAC-seq	H3K9me3	ATAC	WMX-H3K9me3-CA-1#7_8	201969229	59828	3375.8	33481	29329	27758	87.5989	5.42102	7593	2.658	42791	4.853	Epithelial cells(Tumor1)
scNanoCT&ATAC-seq	H3K9me3	ATAC	WMX-H3K9me3-CA-1#7_9	116655302	45894	2541.8	18419	15843	15091	86.0144	3.00683	5568	2.397	21809	6.999	Fibroblasts
scNanoCT&ATAC-seq	H3K9me3	ATAC	WMX-H3K9me3-CA-1#8_1	165535460	28060	5899.3	27395	24413	23224	89.1148	4.57898	11544	2.494	30966	5.62	Epithelial cells(Tumor1)
scNanoCT&ATAC-seq	H3K9me3	ATAC	WMX-H3K9me3-CA-1#8_10	308615925	52600	5867.2	51739	47613	44867	92.0254	8.88868	19851	2.57	63097	5.691	Endothelial cells
scNanoCT&ATAC-seq	H3K9me3	ATAC	WMX-H3K9me3-CA-1#8_11	110805693	19268	5750.8	18414	16956	16103	92.0821	3.15885	5446	2.152	24204	5.11	Fibroblasts
scNanoCT&ATAC-seq	H3K9me3	ATAC	WMX-H3K9me3-CA-1#8_12	86510354	15438	5603.7	15059	13606	12923	90.3513	2.41921	5050	2.772	18673	6.344	Fibroblasts
scNanoCT&ATAC-seq	H3K9me3	ATAC	WMX-H3K9me3-CA-1#8_3	133146100	27166	4901.2	26561	24216	23188	91.1713	3.72166	13021	2.885	29765	5.263	Endothelial cells
scNanoCT&ATAC-seq	H3K9me3	ATAC	WMX-H3K9me3-CA-1#8_4	86357062	15247	5663.9	14876	13982	13336	93.9903	2.49601	4058	4.95	20321	5.461	Immune cells
scNanoCT&ATAC-seq	H3K9me3	ATAC	WMX-H3K9me3-CA-1#8_6	184821291	37069	4985.9	31394	28454	27060	90.6352	5.11805	7535	2.854	41853	4.865	Epithelial cells(Tumor2)
scNanoCT&ATAC-seq	H3K9me3	ATAC	WMX-H3K9me3-CA-1#8_7	623003692	120820	5156.5	118438	107533	100740	90.7927	17.6139	144195	2.413	42967	4.76	Epithelial cells(Tumor2)
scNanoCT&ATAC-seq	H3K9me3	ATAC	WMX-H3K9me3-CA-1#8_8	329283506	62350	5281.2	58026	51934	48989	89.5013	9.20461	16893	2.029	73198	4.47	Epithelial cells(Tumor1)
scNanoCT&ATAC-seq	H3K9me3	ATAC	WMX-H3K9me3-CA-1#8_9	212293019	37632	5641.3	36378	33040	31220	90.8241	5.98083	12573	2.742	44166	5.587	Epithelial cells(Tumor2)
scNanoCT&ATAC-seq	H3K9me3	ATAC	WMX-H3K9me3-CA-10#49_10	180502932	40099	4501.4	38176	35245	34458	92.3224	4.91524	30671	1.482	27476	5.224	Epithelial cells(Tumor1)
scNanoCT&ATAC-seq	H3K9me3	ATAC	WMX-H3K9me3-CA-10#49_11	61698108	14579	4232	12105	11096	10871	91.6646	1.60557	6165	3.286	11774	4.776	Fibroblasts
scNanoCT&ATAC-seq	H3K9me3	ATAC	WMX-H3K9me3-CA-10#49_12	83342539	17633	4726.5	16121	15057	14792	93.3999	2.26201	7329	2.742	17507	4.963	Epithelial cells(Tumor1)
scNanoCT&ATAC-seq	H3K9me3	ATAC	WMX-H3K9me3-CA-10#49_3	42089380	9769	4308.5	8863	8048	7948	90.8045	1.02932	4423	1.867	8968	4.884	Endothelial cells
scNanoCT&ATAC-seq	H3K9me3	ATAC	WMX-H3K9me3-CA-10#49_4	101458524	19531	5194.7	18702	17330	17079	92.6639	2.75075	8949	2.798	20053	4.568	Epithelial cells(Tumor1)
scNanoCT&ATAC-seq	H3K9me3	ATAC	WMX-H3K9me3-CA-10#49_5	56697052	10743	5277.6	10097	9214	9066	91.2548	1.47053	3240	3.231	12016	4.698	Epithelial cells(Tumor1)
scNanoCT&ATAC-seq	H3K9me3	ATAC	WMX-H3K9me3-CA-10#49_6	160323106	108581	1476.5	30504	23193	22830	76.0327	3.07774	12550	2.162	25718	4.439	Epithelial cells(Tumor1)
scNanoCT&ATAC-seq	H3K9me3	ATAC	WMX-H3K9me3-CA-10#49_7	86893388	33767	2573.3	16276	13998	13752	86.0039	1.98505	8646	1.872	14127	5.25	Fibroblasts
scNanoCT&ATAC-seq	H3K9me3	ATAC	WMX-H3K9me3-CA-10#49_9	113551128	67547	1681.1	19681	16604	16328	84.3656	2.42719	9188	2.577	17897	5.994	Endothelial cells
scNanoCT&ATAC-seq	H3K9me3	ATAC	WMX-H3K9me3-CA-10#50_1	49505745	10564	4686.3	9504	8893	8726	93.5711	1.32738	3632	3.112	11287	4.866	Fibroblasts
scNanoCT&ATAC-seq	H3K9me3	ATAC	WMX-H3K9me3-CA-10#50_10	48868718	9726	5024.5	9196	8744	8606	95.0848	1.36893	2571	3.52	11984	4.679	Immune cells
scNanoCT&ATAC-seq	H3K9me3	ATAC	WMX-H3K9me3-CA-10#50_11	43967248	11919	3688.8	8312	7616	7479	91.6266	1.15728	3342	6.223	9302	5.613	Fibroblasts
scNanoCT&ATAC-seq	H3K9me3	ATAC	WMX-H3K9me3-CA-10#50_12	62717560	13624	4603.5	12953	11936	11614	92.1485	1.70331	7813	1.72	11799	5.139	Fibroblasts
scNanoCT&ATAC-seq	H3K9me3	ATAC	WMX-H3K9me3-CA-10#50_2	46198964	10818	4270.6	8110	7519	7411	92.7127	1.16424	3277	1.98	9263	4.455	Fibroblasts
scNanoCT&ATAC-seq	H3K9me3	ATAC	WMX-H3K9me3-CA-10#50_4	64671447	13097	4937.9	12494	11330	11137	90.6835	1.72698	9714	4.277	9466	5.664	Epithelial cells(Tumor2)
scNanoCT&ATAC-seq	H3K9me3	ATAC	WMX-H3K9me3-CA-10#50_5	53408195	10211	5230.5	9600	9124	8961	95.0417	1.45672	2078	3.378	13424	5.984	Fibroblasts
scNanoCT&ATAC-seq	H3K9me3	ATAC	WMX-H3K9me3-CA-10#50_6	110661587	109351	1012	20524	13031	12867	63.4915	1.74709	6292	1.98	15336	4.062	Epithelial cells(Normal)
scNanoCT&ATAC-seq	H3K9me3	ATAC	WMX-H3K9me3-CA-10#50_7	89718102	56752	1580.9	17083	13634	13440	79.8103	1.93027	4998	2.274	17327	5.371	Epithelial cells(Tumor1)
scNanoCT&ATAC-seq	H3K9me3	ATAC	WMX-H3K9me3-CA-10#50_8	69882399	35833	1950.2	12631	10656	10472	84.3639	1.61743	3635	1.705	14201	4.872	Endothelial cells
scNanoCT&ATAC-seq	H3K9me3	ATAC	WMX-H3K9me3-CA-10#50_9	132285377	44473	2974.5	26176	23459	22973	89.6203	3.3829	11375	1.722	27315	4.155	Epithelial cells(Tumor1)
scNanoCT&ATAC-seq	H3K9me3	ATAC	WMX-H3K9me3-CA-10#51_1	47016532	10046	4680.1	8857	8127	8024	91.7579	1.18895	3941	1.188	9550	4.269	Endothelial cells
scNanoCT&ATAC-seq	H3K9me3	ATAC	WMX-H3K9me3-CA-10#51_10	25747222	5307	4851.6	4488	4282	4232	95.41	0.677715	673	0	6395	4.316	Fibroblasts
scNanoCT&ATAC-seq	H3K9me3	ATAC	WMX-H3K9me3-CA-10#51_12	42539909	10762	3952.8	8078	7479	7351	92.5848	1.11453	3472	1.54	8896	5.024	Fibroblasts
scNanoCT&ATAC-seq	H3K9me3	ATAC	WMX-H3K9me3-CA-10#51_3	85938019	22239	3864.3	20188	17880	17563	88.5675	2.13345	15749	2.28	13681	5.078	Epithelial cells(Tumor2)
scNanoCT&ATAC-seq	H3K9me3	ATAC	WMX-H3K9me3-CA-10#51_5	78331454	18736	4180.8	15510	14428	14211	93.0239	2.09488	7499	2.301	16649	5.137	Fibroblasts
scNanoCT&ATAC-seq	H3K9me3	ATAC	WMX-H3K9me3-CA-10#51_6	200899054	251008	800.4	35795	18068	17906	50.4763	2.44884	8179	3.067	21384	4.37	Endothelial cells
scNanoCT&ATAC-seq	H3K9me3	ATAC	WMX-H3K9me3-CA-10#51_7	86617169	104254	830.8	15894	9098	9018	57.2417	1.11776	5903	1.634	8695	4.8	Epithelial cells(Tumor2)
scNanoCT&ATAC-seq	H3K9me3	ATAC	WMX-H3K9me3-CA-10#51_8	62420476	30887	2020.9	11858	9956	9805	83.9602	1.39402	5475	1.714	11079	4.961	Fibroblasts
scNanoCT&ATAC-seq	H3K9me3	ATAC	WMX-H3K9me3-CA-10#51_9	84373495	42416	1989.2	15548	12949	12720	83.284	1.89319	6862	3.32	14398	5.05	Endothelial cells
scNanoCT&ATAC-seq	H3K9me3	ATAC	WMX-H3K9me3-CA-10#52_1	52554574	12116	4337.6	10975	10028	9855	91.3713	1.32406	5966	4.998	10725	4.665	Epithelial cells(Tumor1)
scNanoCT&ATAC-seq	H3K9me3	ATAC	WMX-H3K9me3-CA-10#52_12	48643390	13190	3687.9	10465	9450	9311	90.301	1.24954	3541	2.31	11998	4.461	Fibroblasts
scNanoCT&ATAC-seq	H3K9me3	ATAC	WMX-H3K9me3-CA-10#52_2	73392545	24948	2941.8	14853	13087	12857	88.1101	1.72833	6423	2.183	15076	4.48	Epithelial cells(Tumor1)
scNanoCT&ATAC-seq	H3K9me3	ATAC	WMX-H3K9me3-CA-10#52_3	42336293	10560	4009.1	9676	8868	8739	91.6494	1.07552	4023	1.904	10381	4.206	Epithelial cells(Tumor1)
scNanoCT&ATAC-seq	H3K9me3	ATAC	WMX-H3K9me3-CA-10#52_5	25999122	5414	4802.2	4825	4483	4420	92.9119	0.646738	1920	3.253	5721	6.311	Epithelial cells(Normal)
scNanoCT&ATAC-seq	H3K9me3	ATAC	WMX-H3K9me3-CA-10#52_6	144922658	164683	880	26171	15704	15592	60.0053	2.03623	6777	3.66	19167	5.69	Epithelial cells(Tumor1)
scNanoCT&ATAC-seq	H3K9me3	ATAC	WMX-H3K9me3-CA-10#52_7	63560507	46358	1371.1	13156	10242	10042	77.8504	1.20281	8036	1.56	8761	4.79	Endothelial cells
scNanoCT&ATAC-seq	H3K9me3	ATAC	WMX-H3K9me3-CA-10#52_8	100188634	75075	1334.5	19460	15428	15220	79.2806	1.99667	5958	1.188	19703	4.389	Endothelial cells
scNanoCT&ATAC-seq	H3K9me3	ATAC	WMX-H3K9me3-CA-10#53_1	116714930	26269	4443.1	24266	21813	21240	89.8912	3.01145	19558	2.027	16567	5.027	Fibroblasts
scNanoCT&ATAC-seq	H3K9me3	ATAC	WMX-H3K9me3-CA-10#53_10	32174949	6610	4867.6	5860	5532	5431	94.4027	0.850922	2135	2.772	6917	6.638	Endothelial cells
scNanoCT&ATAC-seq	H3K9me3	ATAC	WMX-H3K9me3-CA-10#53_11	65721936	21567	3047.3	12787	11617	11369	90.8501	1.68723	6384	3.36	12784	4.704	Fibroblasts
scNanoCT&ATAC-seq	H3K9me3	ATAC	WMX-H3K9me3-CA-10#53_12	35319657	7133	4951.6	6536	6058	5934	92.6867	0.931918	3218	2.687	6715	6.001	Endothelial cells
scNanoCT&ATAC-seq	H3K9me3	ATAC	WMX-H3K9me3-CA-10#53_2	75765144	17460	4339.4	13582	12664	12437	93.2411	1.94625	4405	2.2	16676	5.017	Fibroblasts
scNanoCT&ATAC-seq	H3K9me3	ATAC	WMX-H3K9me3-CA-10#53_3	38807646	8892	4364.3	8037	7368	7240	91.676	0.972191	3958	3.324	8275	4.865	Fibroblasts
scNanoCT&ATAC-seq	H3K9me3	ATAC	WMX-H3K9me3-CA-10#53_5	86024364	18139	4742.5	15966	14255	13965	89.2835	2.19099	9161	2.282	14501	4.999	Epithelial cells(Tumor1)
scNanoCT&ATAC-seq	H3K9me3	ATAC	WMX-H3K9me3-CA-10#53_6	188141687	172317	1091.8	33163	22188	21854	66.9059	3.20544	8744	2.497	27617	4.667	Epithelial cells(Tumor2)
scNanoCT&ATAC-seq	H3K9me3	ATAC	WMX-H3K9me3-CA-10#53_7	87675957	36836	2380.2	16235	14049	13804	86.5353	2.07754	6217	2.274	16798	4.845	Fibroblasts
scNanoCT&ATAC-seq	H3K9me3	ATAC	WMX-H3K9me3-CA-10#53_9	135135470	45838	2948.1	26019	23158	22707	89.0042	3.41049	10319	2.148	27659	4.29	Epithelial cells(Tumor1)
scNanoCT&ATAC-seq	H3K9me3	ATAC	WMX-H3K9me3-CA-10#54_1	52257374	11002	4749.8	10015	9291	9161	92.7708	1.36469	3243	3.663	12193	5.027	Epithelial cells(Tumor1)
scNanoCT&ATAC-seq	H3K9me3	ATAC	WMX-H3K9me3-CA-10#54_10	50030358	10519	4756.2	9665	8917	8778	92.2607	1.33038	4526	1.98	10264	5.47	Endothelial cells
scNanoCT&ATAC-seq	H3K9me3	ATAC	WMX-H3K9me3-CA-10#54_11	40148116	12147	3305.2	7552	6919	6838	91.6181	1.02756	2795	3.154	8752	5.233	Endothelial cells
scNanoCT&ATAC-seq	H3K9me3	ATAC	WMX-H3K9me3-CA-10#54_12	86896027	18182	4779.2	17013	15713	15445	92.3588	2.36759	4043	3.583	21925	4.594	Epithelial cells(Tumor2)
scNanoCT&ATAC-seq	H3K9me3	ATAC	WMX-H3K9me3-CA-10#54_2	46233373	10817	4274.1	7846	7267	7175	92.6204	1.11095	2650	2.829	9492	4.748	Fibroblasts
scNanoCT&ATAC-seq	H3K9me3	ATAC	WMX-H3K9me3-CA-10#54_3	28713995	6841	4197.3	6043	5515	5448	91.2626	0.707067	2731	2.074	6483	5.134	Fibroblasts
scNanoCT&ATAC-seq	H3K9me3	ATAC	WMX-H3K9me3-CA-10#54_4	33230878	6470	5136.1	5957	5545	5483	93.0838	0.866171	3010	4.95	6390	5.872	Endothelial cells
scNanoCT&ATAC-seq	H3K9me3	ATAC	WMX-H3K9me3-CA-10#54_7	100012625	67435	1483.1	17907	13946	13764	77.8802	2.03602	5226	1.408	17507	4.778	Epithelial cells(Tumor1)
scNanoCT&ATAC-seq	H3K9me3	ATAC	WMX-H3K9me3-CA-10#54_8	86293277	58266	1481	15621	12653	12428	80.9999	1.78697	6256	3.477	14769	5.19	Fibroblasts
scNanoCT&ATAC-seq	H3K9me3	ATAC	WMX-H3K9me3-CA-10#54_9	71900212	65084	1104.7	12502	8998	8884	71.9725	1.29614	3491	3.702	11168	5.505	Fibroblasts
scNanoCT&ATAC-seq	H3K9me3	ATAC	WMX-H3K9me3-CA-10#55_1	46009114	9413	4887.8	8677	7973	7854	91.8866	1.18345	3982	0	9420	4.843	Endothelial cells
scNanoCT&ATAC-seq	H3K9me3	ATAC	WMX-H3K9me3-CA-10#55_10	80255165	16364	4904.4	15346	14222	13995	92.6756	2.18318	5819	2.7	17433	4.59	Epithelial cells(Tumor1)
scNanoCT&ATAC-seq	H3K9me3	ATAC	WMX-H3K9me3-CA-10#55_11	55623752	13423	4143.9	11055	10226	10032	92.5011	1.47081	5226	4.092	11665	4.453	Fibroblasts
scNanoCT&ATAC-seq	H3K9me3	ATAC	WMX-H3K9me3-CA-10#55_12	52363189	10877	4814.1	10112	9397	9241	92.9292	1.42672	3401	2.277	11942	4.978	Epithelial cells(Tumor1)
scNanoCT&ATAC-seq	H3K9me3	ATAC	WMX-H3K9me3-CA-10#55_2	56766070	12080	4699.2	10206	9526	9383	93.3373	1.44811	3751	3.52	12064	5.693	Endothelial cells
scNanoCT&ATAC-seq	H3K9me3	ATAC	WMX-H3K9me3-CA-10#55_3	48089350	11373	4228.4	10462	9674	9550	92.468	1.24109	3170	1.62	12807	5.284	Epithelial cells(Tumor1)
scNanoCT&ATAC-seq	H3K9me3	ATAC	WMX-H3K9me3-CA-10#55_4	63660451	12549	5073	11865	10600	10432	89.3384	1.64871	6299	2.186	11408	6.122	Endothelial cells
scNanoCT&ATAC-seq	H3K9me3	ATAC	WMX-H3K9me3-CA-10#55_5	49332183	9949	4958.5	9280	8595	8462	92.6185	1.3013	4497	2.97	9856	4.981	Endothelial cells
scNanoCT&ATAC-seq	H3K9me3	ATAC	WMX-H3K9me3-CA-10#55_6	173134152	172290	1004.9	33216	20400	20086	61.4162	2.81575	10672	2.449	22736	4.892	Fibroblasts
scNanoCT&ATAC-seq	H3K9me3	ATAC	WMX-H3K9me3-CA-10#55_7	109747777	33166	3309	21374	19182	18816	89.7445	2.77018	10865	2.33	20535	5.127	Endothelial cells
scNanoCT&ATAC-seq	H3K9me3	ATAC	WMX-H3K9me3-CA-10#55_8	47948183	28785	1665.7	8313	6612	6505	79.5381	0.975528	3364	2.074	7472	5.732	Endothelial cells
scNanoCT&ATAC-seq	H3K9me3	ATAC	WMX-H3K9me3-CA-10#55_9	119029641	72393	1644.2	23897	18635	18287	77.9805	2.54793	12381	2.546	18154	5.464	Endothelial cells
scNanoCT&ATAC-seq	H3K9me3	ATAC	WMX-H3K9me3-CA-10#56_1	35708626	7555	4726.5	6939	6440	6321	92.8088	0.890509	3045	1.65	7792	5.236	Endothelial cells
scNanoCT&ATAC-seq	H3K9me3	ATAC	WMX-H3K9me3-CA-10#56_10	143599196	30241	4748.5	28597	26124	25545	91.3522	3.83567	15985	2.769	26892	5.976	Fibroblasts
scNanoCT&ATAC-seq	H3K9me3	ATAC	WMX-H3K9me3-CA-10#56_11	137467078	34529	3981.2	32767	30425	29447	92.8526	3.66505	30367	2.583	19855	4.056	Immune cells
scNanoCT&ATAC-seq	H3K9me3	ATAC	WMX-H3K9me3-CA-10#56_12	112470407	23538	4778.2	21549	20127	19703	93.4011	3.07905	5366	2.659	27665	4.799	Epithelial cells(Tumor1)
scNanoCT&ATAC-seq	H3K9me3	ATAC	WMX-H3K9me3-CA-10#56_2	196591691	40281	4880.5	37015	34445	33635	93.0569	5.21149	14003	2.076	42229	4.491	Epithelial cells(Tumor2)
scNanoCT&ATAC-seq	H3K9me3	ATAC	WMX-H3K9me3-CA-10#56_3	55960475	13862	4037	12874	11939	11740	92.7373	1.43027	4801	1.98	14641	4.155	Epithelial cells(Tumor1)
scNanoCT&ATAC-seq	H3K9me3	ATAC	WMX-H3K9me3-CA-10#56_4	45913278	8846	5190.3	8334	7855	7744	94.2525	1.2357	3156	2.07	10093	5.237	Endothelial cells
scNanoCT&ATAC-seq	H3K9me3	ATAC	WMX-H3K9me3-CA-10#56_5	75554737	15638	4831.5	14311	13087	12813	91.4471	1.98099	8822	1.367	13029	5.449	Endothelial cells
scNanoCT&ATAC-seq	H3K9me3	ATAC	WMX-H3K9me3-CA-10#56_7	147026011	52898	2779.4	27626	24169	23611	87.4864	3.53632	13971	2.49	25640	4.113	Endothelial cells
scNanoCT&ATAC-seq	H3K9me3	ATAC	WMX-H3K9me3-CA-10#56_8	77815428	25624	3036.8	14453	12695	12421	87.8364	1.8598	6044	2.497	14983	5.032	Endothelial cells
scNanoCT&ATAC-seq	H3K9me3	ATAC	WMX-H3K9me3-CA-10#56_9	118773369	35679	3328.9	23135	20242	19728	87.4951	2.88107	13193	2.908	19955	4.355	Fibroblasts
scNanoCT&ATAC-seq	H3K9me3	ATAC	WMX-H3K9me3-CA-11#57_1	64716587	13688	4728	12563	11658	11464	92.7963	1.73541	4941	2.497	14416	4.486	Epithelial cells(Tumor2)
scNanoCT&ATAC-seq	H3K9me3	ATAC	WMX-H3K9me3-CA-11#57_10	98930694	21197	4667.2	19966	18353	18016	91.9213	2.68878	9145	2.095	21201	4.4	Epithelial cells(Tumor1)
scNanoCT&ATAC-seq	H3K9me3	ATAC	WMX-H3K9me3-CA-11#57_12	60621725	12426	4878.6	11705	10842	10656	92.6271	1.65369	3203	1.839	14555	4.702	Epithelial cells(Tumor1)
scNanoCT&ATAC-seq	H3K9me3	ATAC	WMX-H3K9me3-CA-11#57_2	55141485	11684	4719.4	10506	9756	9592	92.8612	1.42807	5639	2.97	10467	6.268	Endothelial cells
scNanoCT&ATAC-seq	H3K9me3	ATAC	WMX-H3K9me3-CA-11#57_3	51166629	12812	3993.6	11962	11100	10968	92.7938	1.33799	4511	4.356	13992	4.204	Epithelial cells(Tumor1)
scNanoCT&ATAC-seq	H3K9me3	ATAC	WMX-H3K9me3-CA-11#57_5	63173896	12582	5021	11920	11230	11038	94.2114	1.73045	4565	2.42	14258	4.587	Epithelial cells(Tumor2)
scNanoCT&ATAC-seq	H3K9me3	ATAC	WMX-H3K9me3-CA-11#57_6	79448893	75770	1048.6	13140	8952	8914	68.1279	1.26409	2929	2.796	11936	5.931	Immune cells
scNanoCT&ATAC-seq	H3K9me3	ATAC	WMX-H3K9me3-CA-11#57_8	66144154	15342	4311.3	12521	11639	11460	92.9558	1.7578	3504	2.894	15844	4.454	Epithelial cells(Tumor1)
scNanoCT&ATAC-seq	H3K9me3	ATAC	WMX-H3K9me3-CA-11#57_9	92789203	59437	1561.1	15429	13893	13673	90.0447	2.02538	5980	1.514	16754	4.38	Fibroblasts
scNanoCT&ATAC-seq	H3K9me3	ATAC	WMX-H3K9me3-CA-11#58_1	92753659	19630	4725.1	18462	17088	16739	92.5577	2.47455	8221	1.98	20088	4.302	Epithelial cells(Tumor1)
scNanoCT&ATAC-seq	H3K9me3	ATAC	WMX-H3K9me3-CA-11#58_10	66197148	13670	4842.5	12616	11624	11430	92.137	1.77306	4749	2.22	14406	5.331	Epithelial cells(Tumor1)
scNanoCT&ATAC-seq	H3K9me3	ATAC	WMX-H3K9me3-CA-11#58_11	55903744	13820	4045.1	10534	9820	9627	93.2219	1.48557	4113	1.796	12195	4.63	Fibroblasts
scNanoCT&ATAC-seq	H3K9me3	ATAC	WMX-H3K9me3-CA-11#58_2	112589804	24054	4680.7	21545	20170	19784	93.618	2.97258	7521	3.371	25843	4.228	Epithelial cells(Tumor1)
scNanoCT&ATAC-seq	H3K9me3	ATAC	WMX-H3K9me3-CA-11#58_3	28035303	6533	4291.3	5780	5367	5310	92.8547	0.691079	2361	1.251	6547	4.616	Epithelial cells(Normal)
scNanoCT&ATAC-seq	H3K9me3	ATAC	WMX-H3K9me3-CA-11#58_4	63935864	12628	5063	11984	11159	10991	93.1158	1.7415	4595	2.07	14091	5.204	Epithelial cells(Tumor1)
scNanoCT&ATAC-seq	H3K9me3	ATAC	WMX-H3K9me3-CA-11#58_5	31154018	5884	5294.7	5323	4932	4861	92.6545	0.78009	2483	5.149	5931	6.008	Endothelial cells
scNanoCT&ATAC-seq	H3K9me3	ATAC	WMX-H3K9me3-CA-11#58_6	206920112	158175	1308.2	38693	28059	27486	72.517	3.8247	16363	2.354	29851	4.406	Epithelial cells(Tumor1)
scNanoCT&ATAC-seq	H3K9me3	ATAC	WMX-H3K9me3-CA-11#58_7	71358126	23608	3022.6	13154	11568	11371	87.9428	1.7053	6895	2.517	11965	6.668	Endothelial cells
scNanoCT&ATAC-seq	H3K9me3	ATAC	WMX-H3K9me3-CA-11#58_8	92818319	84840	1094	15561	10910	10766	70.1112	1.59624	4598	2.145	13430	4.935	Fibroblasts
scNanoCT&ATAC-seq	H3K9me3	ATAC	WMX-H3K9me3-CA-11#58_9	110105078	46240	2381.2	20609	18086	17768	87.7578	2.63481	6387	1.21	23328	4.417	Epithelial cells(Tumor1)
scNanoCT&ATAC-seq	H3K9me3	ATAC	WMX-H3K9me3-CA-11#59_1	94076689	20442	4602.1	19237	17724	17344	92.1349	2.51482	7747	2.055	21715	4.912	Fibroblasts
scNanoCT&ATAC-seq	H3K9me3	ATAC	WMX-H3K9me3-CA-11#59_10	64817226	19203	3375.4	12152	11334	11141	93.2686	1.69188	4409	2.79	14221	5.283	Epithelial cells(Tumor1)
scNanoCT&ATAC-seq	H3K9me3	ATAC	WMX-H3K9me3-CA-11#59_11	27643043	7807	3540.8	5028	4559	4472	90.6722	0.688485	2280	2.97	5231	5.281	Endothelial cells
scNanoCT&ATAC-seq	H3K9me3	ATAC	WMX-H3K9me3-CA-11#59_12	65611259	13969	4696.9	12540	11584	11328	92.3764	1.77109	4105	3.58	14820	4.618	Endothelial cells
scNanoCT&ATAC-seq	H3K9me3	ATAC	WMX-H3K9me3-CA-11#59_2	97817038	24075	4063	18822	17346	16984	92.1581	2.553	7014	2.325	21475	4.441	Epithelial cells(Tumor1)
scNanoCT&ATAC-seq	H3K9me3	ATAC	WMX-H3K9me3-CA-11#59_3	63182003	15440	4092.1	14316	13060	12858	91.2266	1.63123	6445	1.98	15119	4.047	Immune cells
scNanoCT&ATAC-seq	H3K9me3	ATAC	WMX-H3K9me3-CA-11#59_4	58851747	11576	5083.9	10943	10159	9968	92.8356	1.58876	3672	3.6	13178	5.238	Epithelial cells(Tumor1)
scNanoCT&ATAC-seq	H3K9me3	ATAC	WMX-H3K9me3-CA-11#59_5	57855139	11902	4861	11008	10357	10143	94.0861	1.57555	5156	2.29	12185	4.79	Fibroblasts
scNanoCT&ATAC-seq	H3K9me3	ATAC	WMX-H3K9me3-CA-11#59_6	161548513	94292	1713.3	30908	24391	23862	78.9148	3.44648	12030	3.652	27723	4.071	Epithelial cells(Tumor2)
scNanoCT&ATAC-seq	H3K9me3	ATAC	WMX-H3K9me3-CA-11#59_7	95598943	38658	2472.9	18601	16145	15851	86.7964	2.30999	6831	5.394	19604	4.601	Epithelial cells(Tumor1)
scNanoCT&ATAC-seq	H3K9me3	ATAC	WMX-H3K9me3-CA-11#59_8	123027381	80432	1529.6	28970	24258	23629	83.7349	2.53659	20318	2.313	19975	5.106	Epithelial cells(Tumor2)
scNanoCT&ATAC-seq	H3K9me3	ATAC	WMX-H3K9me3-CA-11#59_9	108454873	67617	1604	20113	16486	16132	81.9669	2.26184	7904	2.15	18998	4.257	Epithelial cells(Tumor2)
scNanoCT&ATAC-seq	H3K9me3	ATAC	WMX-H3K9me3-CA-11#60_1	76914001	15587	4934.5	14539	13324	13115	91.6432	2.03435	6925	3.96	15398	5.476	Endothelial cells
scNanoCT&ATAC-seq	H3K9me3	ATAC	WMX-H3K9me3-CA-11#60_10	70229037	14813	4741	13632	12529	12338	91.9087	1.89692	6420	2.2	14349	4.142	Epithelial cells(Tumor1)
scNanoCT&ATAC-seq	H3K9me3	ATAC	WMX-H3K9me3-CA-11#60_11	52798868	14944	3533.1	9867	9039	8933	91.6084	1.39869	2539	3.112	12317	5.097	Epithelial cells(Tumor1)
scNanoCT&ATAC-seq	H3K9me3	ATAC	WMX-H3K9me3-CA-11#60_2	100696511	23647	4258.3	20677	18226	17834	88.1462	2.52189	14405	2.587	15466	4.903	Epithelial cells(Tumor1)
scNanoCT&ATAC-seq	H3K9me3	ATAC	WMX-H3K9me3-CA-11#60_3	36382666	8862	4105.5	8065	7409	7300	91.8661	0.928832	4926	3.234	7435	4.834	Fibroblasts
scNanoCT&ATAC-seq	H3K9me3	ATAC	WMX-H3K9me3-CA-11#60_4	45178550	9169	4927.3	8606	7942	7859	92.2845	1.19919	3087	1.697	10161	4.661	Epithelial cells(Tumor2)
scNanoCT&ATAC-seq	H3K9me3	ATAC	WMX-H3K9me3-CA-11#60_5	51646570	10765	4797.6	9549	8857	8735	92.7532	1.37357	4851	1.34	10002	4.455	Fibroblasts
scNanoCT&ATAC-seq	H3K9me3	ATAC	WMX-H3K9me3-CA-11#60_6	176610588	253292	697.3	29094	13052	13003	44.8615	1.84552	5924	2.537	15318	5.36	Epithelial cells(Tumor2)
scNanoCT&ATAC-seq	H3K9me3	ATAC	WMX-H3K9me3-CA-11#60_7	76244086	35283	2160.9	14322	12050	11867	84.1363	1.74709	5904	1.08	13835	4.44	Fibroblasts
scNanoCT&ATAC-seq	H3K9me3	ATAC	WMX-H3K9me3-CA-11#60_8	75121261	37351	2011.2	13915	11805	11652	84.8365	1.73737	4698	2.234	14974	4.763	Epithelial cells(Tumor1)
scNanoCT&ATAC-seq	H3K9me3	ATAC	WMX-H3K9me3-CA-11#60_9	73528863	102020	720.7	12856	6387	6349	49.6811	0.881967	3263	1.378	7056	4.477	Epithelial cells(Tumor2)
scNanoCT&ATAC-seq	H3K9me3	ATAC	WMX-H3K9me3-CA-11#61_1	39089293	8082	4836.6	7550	6886	6774	91.2053	1.01666	4542	4.563	6922	5.393	Fibroblasts
scNanoCT&ATAC-seq	H3K9me3	ATAC	WMX-H3K9me3-CA-11#61_10	87618102	19211	4560.8	18209	16315	15945	89.5986	2.31917	9883	2.76	17026	4.968	Epithelial cells(Tumor1)
scNanoCT&ATAC-seq	H3K9me3	ATAC	WMX-H3K9me3-CA-11#61_11	56818103	13490	4211.9	10911	10000	9808	91.6506	1.53439	4333	1.3	12277	5.284	Fibroblasts
scNanoCT&ATAC-seq	H3K9me3	ATAC	WMX-H3K9me3-CA-11#61_12	62399007	13149	4745.5	12535	11690	11445	93.2589	1.72371	6343	1.634	13191	4.23	Fibroblasts
scNanoCT&ATAC-seq	H3K9me3	ATAC	WMX-H3K9me3-CA-11#61_2	80272618	19956	4022.5	16231	14820	14502	91.3068	2.11349	6809	2.016	17800	4.209	Fibroblasts
scNanoCT&ATAC-seq	H3K9me3	ATAC	WMX-H3K9me3-CA-11#61_4	24352640	4740	5137.7	4524	4257	4201	94.0981	0.67258	1399	1.98	5776	4.301	Endothelial cells
scNanoCT&ATAC-seq	H3K9me3	ATAC	WMX-H3K9me3-CA-11#61_5	30866201	6018	5129	5707	5386	5300	94.3753	0.851284	2021	2.351	6977	6.586	Endothelial cells
scNanoCT&ATAC-seq	H3K9me3	ATAC	WMX-H3K9me3-CA-11#61_6	136291463	76703	1776.9	28209	21138	20626	74.9335	2.90974	11967	2.171	22226	4.007	Epithelial cells(Tumor1)
scNanoCT&ATAC-seq	H3K9me3	ATAC	WMX-H3K9me3-CA-11#61_8	57401345	34275	1674.7	11114	8476	8334	76.2642	1.23487	4453	1.842	9645	4.965	Endothelial cells
scNanoCT&ATAC-seq	H3K9me3	ATAC	WMX-H3K9me3-CA-11#61_9	79076061	25054	3156.2	15600	14082	13792	90.2692	2.01754	7992	2.857	15214	4.36	Fibroblasts
scNanoCT&ATAC-seq	H3K9me3	ATAC	WMX-H3K9me3-CA-11#62_10	77826843	18801	4139.5	17949	16264	15938	90.6123	2.09471	8092	1.462	18959	4.552	Epithelial cells(Tumor1)
scNanoCT&ATAC-seq	H3K9me3	ATAC	WMX-H3K9me3-CA-11#62_11	57563530	13060	4407.6	11114	10298	10104	92.6579	1.58069	2943	2.25	14143	5.547	Epithelial cells(Tumor2)
scNanoCT&ATAC-seq	H3K9me3	ATAC	WMX-H3K9me3-CA-11#62_2	37304105	8692	4291.8	6976	6476	6381	92.8326	0.967394	2434	1.355	8240	4.516	Endothelial cells
scNanoCT&ATAC-seq	H3K9me3	ATAC	WMX-H3K9me3-CA-11#62_3	74118642	18523	4001.4	17628	16373	16058	92.8806	1.99455	7269	1.81	19917	4.33	Epithelial cells(Tumor1)
scNanoCT&ATAC-seq	H3K9me3	ATAC	WMX-H3K9me3-CA-11#62_4	53055216	10176	5213.8	9777	9306	9188	95.1826	1.49958	2010	1.98	13548	4.485	Epithelial cells(Tumor2)
scNanoCT&ATAC-seq	H3K9me3	ATAC	WMX-H3K9me3-CA-11#62_5	37404031	7490	4993.9	7149	6704	6559	93.7754	1.03093	3300	2.97	7900	5.394	Immune cells
scNanoCT&ATAC-seq	H3K9me3	ATAC	WMX-H3K9me3-CA-11#62_6	58963455	51217	1151.2	10081	6866	6786	68.1083	1.00499	3031	0	8409	4.03	Endothelial cells
scNanoCT&ATAC-seq	H3K9me3	ATAC	WMX-H3K9me3-CA-11#62_7	71188367	31605	2252.4	12910	11356	11169	87.9628	1.68865	3560	1.188	15029	5.233	Epithelial cells(Tumor2)
scNanoCT&ATAC-seq	H3K9me3	ATAC	WMX-H3K9me3-CA-11#62_8	96699864	30872	3132.3	19486	17784	17444	91.2655	2.55404	6591	5.671	23087	4.129	Epithelial cells(Tumor1)
scNanoCT&ATAC-seq	H3K9me3	ATAC	WMX-H3K9me3-CA-11#62_9	78192822	27955	2797.1	14689	13316	13076	90.6529	1.97996	3715	2.75	18264	4.074	Epithelial cells(Tumor1)
scNanoCT&ATAC-seq	H3K9me3	ATAC	WMX-H3K9me3-CA-11#63_1	92883547	19373	4794.5	18383	16944	16616	92.1721	2.45154	9435	2.5	18853	5.828	Endothelial cells
scNanoCT&ATAC-seq	H3K9me3	ATAC	WMX-H3K9me3-CA-11#63_11	89466533	22921	3903.3	18514	16751	16386	90.4775	2.33226	13416	1.951	14294	4.055	Epithelial cells(Normal)
scNanoCT&ATAC-seq	H3K9me3	ATAC	WMX-H3K9me3-CA-11#63_12	69159583	15004	4609.4	13825	12640	12312	91.4286	1.81888	6538	3.564	14230	4.079	Fibroblasts
scNanoCT&ATAC-seq	H3K9me3	ATAC	WMX-H3K9me3-CA-11#63_2	120636319	26073	4626.9	24003	22191	21746	92.4509	3.15515	8490	3.74	28099	4.545	Epithelial cells(Tumor1)
scNanoCT&ATAC-seq	H3K9me3	ATAC	WMX-H3K9me3-CA-11#63_3	61293761	15109	4056.8	14179	13119	12851	92.5242	1.5892	7963	1.641	13566	5.33	Fibroblasts
scNanoCT&ATAC-seq	H3K9me3	ATAC	WMX-H3K9me3-CA-11#63_4	70510479	14497	4863.8	13910	12620	12386	90.7261	1.86186	8206	5.171	12911	4.463	Fibroblasts
scNanoCT&ATAC-seq	H3K9me3	ATAC	WMX-H3K9me3-CA-11#63_5	87175985	18288	4766.8	17167	16198	15899	94.3554	2.37624	7075	2.298	20104	4.211	Epithelial cells(Tumor1)
scNanoCT&ATAC-seq	H3K9me3	ATAC	WMX-H3K9me3-CA-11#63_6	89581256	64625	1386.2	15934	11422	11252	71.6832	1.55121	7483	3.265	11468	5.075	Epithelial cells(Tumor2)
scNanoCT&ATAC-seq	H3K9me3	ATAC	WMX-H3K9me3-CA-11#63_7	219411917	54797	4004.1	49849	46055	44698	92.389	5.85629	49887	2.007	25962	5.163	Epithelial cells(Tumor1)
scNanoCT&ATAC-seq	H3K9me3	ATAC	WMX-H3K9me3-CA-11#63_8	96082977	31019	3097.6	19128	16900	16517	88.3522	2.37102	7444	2.97	20616	4.288	Fibroblasts
scNanoCT&ATAC-seq	H3K9me3	ATAC	WMX-H3K9me3-CA-11#63_9	62762523	18725	3351.8	11489	10366	10200	90.2254	1.55862	2777	3.053	14345	4.262	Epithelial cells(Normal)
scNanoCT&ATAC-seq	H3K9me3	ATAC	WMX-H3K9me3-CA-11#64_10	87314886	18238	4787.5	17333	16188	15865	93.3941	2.40739	5744	1.556	20928	4.436	Epithelial cells(Tumor1)
scNanoCT&ATAC-seq	H3K9me3	ATAC	WMX-H3K9me3-CA-11#64_11	78820329	15950	4941.7	14997	14125	13849	94.1855	2.18463	4061	3.366	19168	4.653	Epithelial cells(Tumor1)
scNanoCT&ATAC-seq	H3K9me3	ATAC	WMX-H3K9me3-CA-11#64_12	80823443	16440	4916.3	15469	14378	14069	92.9472	2.21692	3986	1.659	19699	4.35	Epithelial cells(Tumor2)
scNanoCT&ATAC-seq	H3K9me3	ATAC	WMX-H3K9me3-CA-11#64_2	80802273	16925	4774.1	15821	14607	14274	92.3267	2.0921	9045	2.475	14966	5.443	Fibroblasts
scNanoCT&ATAC-seq	H3K9me3	ATAC	WMX-H3K9me3-CA-11#64_4	40862609	7863	5196.8	7501	6949	6835	92.641	1.08691	3245	1.291	8292	4.012	Endothelial cells
scNanoCT&ATAC-seq	H3K9me3	ATAC	WMX-H3K9me3-CA-11#64_6	96546073	22888	4218.2	18939	17355	16966	91.6363	2.48568	8348	2.196	20353	4.612	Endothelial cells
scNanoCT&ATAC-seq	H3K9me3	ATAC	WMX-H3K9me3-CA-11#64_9	172239875	39785	4329.3	34059	30867	30135	90.628	4.55533	12788	2.662	38149	4.21	Epithelial cells(Tumor1)
scNanoCT&ATAC-seq	H3K9me3	ATAC	WMX-H3K9me3-CA-12#65_1	49427050	11128	4441.7	10517	9755	9569	92.7546	1.27958	4737	1.705	11556	4.549	Fibroblasts
scNanoCT&ATAC-seq	H3K9me3	ATAC	WMX-H3K9me3-CA-12#65_10	110171324	22202	4962.2	21040	19503	19046	92.6949	2.99226	8238	2.139	23640	4.368	Epithelial cells(Tumor1)
scNanoCT&ATAC-seq	H3K9me3	ATAC	WMX-H3K9me3-CA-12#65_11	43318959	8624	5023.1	8010	7364	7201	91.9351	1.11515	3908	4.332	8119	8.308	Fibroblasts
scNanoCT&ATAC-seq	H3K9me3	ATAC	WMX-H3K9me3-CA-12#65_12	91805700	18625	4929.2	17660	16407	16036	92.9049	2.49846	6088	3.36	20804	4.611	Epithelial cells(Tumor2)
scNanoCT&ATAC-seq	H3K9me3	ATAC	WMX-H3K9me3-CA-12#65_2	118547089	23494	5045.8	21929	20815	20375	94.92	3.20873	5318	1.43	28799	4.948	Epithelial cells(Tumor1)
scNanoCT&ATAC-seq	H3K9me3	ATAC	WMX-H3K9me3-CA-12#65_3	71244534	18713	3807.2	17565	15811	15429	90.0142	1.77991	12845	1.613	13228	4.317	Endothelial cells
scNanoCT&ATAC-seq	H3K9me3	ATAC	WMX-H3K9me3-CA-12#65_4	57475407	13615	4221.5	13073	11495	11255	87.9293	1.43228	11682	1.158	7612	5.087	Endothelial cells
scNanoCT&ATAC-seq	H3K9me3	ATAC	WMX-H3K9me3-CA-12#65_6	145270941	31101	4670.9	28473	26223	25601	92.0978	3.78285	12761	1.914	30251	5.076	Epithelial cells(Tumor1)
scNanoCT&ATAC-seq	H3K9me3	ATAC	WMX-H3K9me3-CA-12#65_7	100307211	20386	4920.4	18841	17020	16671	90.3349	2.58319	6419	4.149	21082	5.352	Epithelial cells(Tumor2)
scNanoCT&ATAC-seq	H3K9me3	ATAC	WMX-H3K9me3-CA-12#65_8	65038412	13338	4876.2	12075	10528	10241	87.1884	1.57885	8575	3.402	8716	6.997	Epithelial cells(Tumor2)
scNanoCT&ATAC-seq	H3K9me3	ATAC	WMX-H3K9me3-CA-12#65_9	171900868	46714	3679.9	44236	39888	38686	90.1709	4.43308	42295	2.024	23578	4.928	Fibroblasts
scNanoCT&ATAC-seq	H3K9me3	ATAC	WMX-H3K9me3-CA-12#66_1	29796236	5987	4976.8	5562	5225	5135	93.941	0.763595	2662	1.089	6106	5.593	Endothelial cells
scNanoCT&ATAC-seq	H3K9me3	ATAC	WMX-H3K9me3-CA-12#66_11	63931554	12980	4925.4	12117	11449	11214	94.4871	1.74338	3653	2.33	15397	4.178	Fibroblasts
scNanoCT&ATAC-seq	H3K9me3	ATAC	WMX-H3K9me3-CA-12#66_12	74464063	20341	3660.8	19261	16844	16422	87.4513	1.87928	13310	1.518	14306	4.354	Epithelial cells(Tumor2)
scNanoCT&ATAC-seq	H3K9me3	ATAC	WMX-H3K9me3-CA-12#66_2	123459772	25975	4753	24211	21862	21336	90.2978	3.17013	11868	1.65	23465	5.792	Epithelial cells(Tumor1)
scNanoCT&ATAC-seq	H3K9me3	ATAC	WMX-H3K9me3-CA-12#66_3	48474355	11872	4083.1	11059	10096	9933	91.2922	1.22829	4478	2.537	12129	4.283	Epithelial cells(Tumor1)
scNanoCT&ATAC-seq	H3K9me3	ATAC	WMX-H3K9me3-CA-12#66_5	89225167	17481	5104.1	16871	16025	15745	94.9855	2.47988	4800	1.839	21984	4.318	Epithelial cells(Tumor1)
scNanoCT&ATAC-seq	H3K9me3	ATAC	WMX-H3K9me3-CA-12#66_7	71509653	25593	2794.1	12948	11289	11101	87.1872	1.71148	3606	2.271	14854	5.037	Epithelial cells(Normal)
scNanoCT&ATAC-seq	H3K9me3	ATAC	WMX-H3K9me3-CA-12#66_8	80128659	17199	4658.9	15782	14170	13861	89.7858	2.0536	8206	1.706	15405	5.131	Epithelial cells(Tumor1)
scNanoCT&ATAC-seq	H3K9me3	ATAC	WMX-H3K9me3-CA-12#66_9	81587244	20200	4039	15324	13746	13468	89.7024	2.05449	5861	2.772	16670	4.771	Epithelial cells(Tumor2)
scNanoCT&ATAC-seq	H3K9me3	ATAC	WMX-H3K9me3-CA-12#67_10	121896606	25844	4716.6	24583	22197	21670	90.2941	3.26774	15238	3.116	21215	5.628	Epithelial cells(Tumor1)
scNanoCT&ATAC-seq	H3K9me3	ATAC	WMX-H3K9me3-CA-12#67_11	91414255	18481	4946.4	17623	16647	16365	94.4618	2.57017	3797	4.41	23818	4.976	Epithelial cells(Tumor2)
scNanoCT&ATAC-seq	H3K9me3	ATAC	WMX-H3K9me3-CA-12#67_2	82118032	17280	4752.2	15533	14443	14188	92.9827	2.16858	5824	2.34	17876	4.112	Endothelial cells
scNanoCT&ATAC-seq	H3K9me3	ATAC	WMX-H3K9me3-CA-12#67_3	78914383	20755	3802.2	19345	17099	16777	88.3898	1.95186	13231	2.097	14986	4.567	Fibroblasts
scNanoCT&ATAC-seq	H3K9me3	ATAC	WMX-H3K9me3-CA-12#67_4	35832805	6894	5197.7	6614	6079	5994	91.9111	0.955229	2988	1.639	7216	4.003	Endothelial cells
scNanoCT&ATAC-seq	H3K9me3	ATAC	WMX-H3K9me3-CA-12#67_5	69884544	13747	5083.6	13247	12437	12217	93.8854	1.92643	5093	2.376	15759	4.472	Epithelial cells(Tumor2)
scNanoCT&ATAC-seq	H3K9me3	ATAC	WMX-H3K9me3-CA-12#67_6	79871888	24306	3286.1	15157	13570	13341	89.5296	1.99172	4953	1.842	17544	4.359	Fibroblasts
scNanoCT&ATAC-seq	H3K9me3	ATAC	WMX-H3K9me3-CA-12#67_7	48998130	15211	3221.2	8760	7826	7702	89.3379	1.21088	3012	1.037	9794	6.428	Endothelial cells
scNanoCT&ATAC-seq	H3K9me3	ATAC	WMX-H3K9me3-CA-12#67_9	84931719	18116	4688.2	16994	15358	15055	90.3731	2.21531	9232	3.9	16349	6.398	Endothelial cells
scNanoCT&ATAC-seq	H3K9me3	ATAC	WMX-H3K9me3-CA-12#68_10	44924073	8921	5035.8	8457	7805	7655	92.2904	1.22194	3022	1.98	9846	4.653	Endothelial cells
scNanoCT&ATAC-seq	H3K9me3	ATAC	WMX-H3K9me3-CA-12#68_12	39739844	8018	4956.3	7578	7106	6945	93.7714	1.09465	2907	1.042	8842	5.172	Endothelial cells
scNanoCT&ATAC-seq	H3K9me3	ATAC	WMX-H3K9me3-CA-12#68_2	31474987	6191	5084	5487	5135	5043	93.5848	0.799189	2089	4.62	6322	5.973	Endothelial cells
scNanoCT&ATAC-seq	H3K9me3	ATAC	WMX-H3K9me3-CA-12#68_3	39635269	9386	4222.8	8816	8033	7877	91.1184	1.02638	4091	4.892	9206	4.234	Fibroblasts
scNanoCT&ATAC-seq	H3K9me3	ATAC	WMX-H3K9me3-CA-12#68_4	68098262	13320	5112.5	12859	11978	11788	93.1488	1.87652	4477	2.194	15513	5.142	Endothelial cells
scNanoCT&ATAC-seq	H3K9me3	ATAC	WMX-H3K9me3-CA-12#68_5	45658837	9391	4862	8882	8307	8100	93.5262	1.23744	6339	2.09	7514	5.012	Endothelial cells
scNanoCT&ATAC-seq	H3K9me3	ATAC	WMX-H3K9me3-CA-12#68_6	45278817	10542	4295.1	8296	7579	7426	91.3573	1.12355	4180	2.755	8241	4.214	Endothelial cells
scNanoCT&ATAC-seq	H3K9me3	ATAC	WMX-H3K9me3-CA-12#68_7	113961446	26040	4376.4	23642	21249	20627	89.8782	2.96123	18456	2.616	16283	4.63	Endothelial cells
scNanoCT&ATAC-seq	H3K9me3	ATAC	WMX-H3K9me3-CA-12#68_8	107541968	34111	3152.7	21104	18838	18368	89.2627	2.71119	8271	4.356	22844	4.633	Epithelial cells(Tumor1)
scNanoCT&ATAC-seq	H3K9me3	ATAC	WMX-H3K9me3-CA-12#68_9	67440509	23381	2884.4	12407	10907	10666	87.9101	1.64728	4614	2.513	13317	5.95	Endothelial cells
scNanoCT&ATAC-seq	H3K9me3	ATAC	WMX-H3K9me3-CA-12#69_1	53333443	11816	4513.7	10981	9778	9529	89.0447	1.35154	10308	2.209	5884	4.4	Fibroblasts
scNanoCT&ATAC-seq	H3K9me3	ATAC	WMX-H3K9me3-CA-12#69_10	92963723	18742	4960.2	17730	16406	16073	92.5324	2.53508	7717	2.454	19285	4.316	Epithelial cells(Tumor1)
scNanoCT&ATAC-seq	H3K9me3	ATAC	WMX-H3K9me3-CA-12#69_11	89040306	26393	3373.6	16921	15065	14760	89.0314	2.26109	7289	3.08	17327	4.622	Epithelial cells(Tumor2)
scNanoCT&ATAC-seq	H3K9me3	ATAC	WMX-H3K9me3-CA-12#69_12	41398814	8186	5057.3	7592	7065	6921	93.0585	1.09648	2776	3.08	8957	6.423	Endothelial cells
scNanoCT&ATAC-seq	H3K9me3	ATAC	WMX-H3K9me3-CA-12#69_2	115543635	24736	4671.1	23035	21097	20621	91.5867	3.02444	13557	1.605	21222	5.056	Endothelial cells
scNanoCT&ATAC-seq	H3K9me3	ATAC	WMX-H3K9me3-CA-12#69_3	28607809	6587	4343.1	5938	5398	5344	90.906	0.704997	2421	1.066	6507	4.061	Endothelial cells
scNanoCT&ATAC-seq	H3K9me3	ATAC	WMX-H3K9me3-CA-12#69_4	55682793	10796	5157.7	10263	9594	9443	93.4814	1.51038	3177	1.747	12804	5.03	Epithelial cells(Tumor1)
scNanoCT&ATAC-seq	H3K9me3	ATAC	WMX-H3K9me3-CA-12#69_5	58038870	11373	5103.2	10811	10190	10010	94.2559	1.59462	4430	2.772	12616	4.91	Fibroblasts
scNanoCT&ATAC-seq	H3K9me3	ATAC	WMX-H3K9me3-CA-12#69_6	167882508	88847	1889.6	32050	25807	25253	80.5211	3.64605	14861	1.955	27657	4.656	Epithelial cells(Tumor1)
scNanoCT&ATAC-seq	H3K9me3	ATAC	WMX-H3K9me3-CA-12#69_7	53749698	21590	2489.6	8931	7840	7741	87.7841	1.22102	3096	1.881	9625	5.131	Endothelial cells
scNanoCT&ATAC-seq	H3K9me3	ATAC	WMX-H3K9me3-CA-12#69_8	95907675	30761	3117.8	18445	15837	15452	85.8607	2.31287	15482	2.532	10712	6.079	Epithelial cells(Normal)
scNanoCT&ATAC-seq	H3K9me3	ATAC	WMX-H3K9me3-CA-12#69_9	69054162	30408	2270.9	12294	10639	10440	86.5381	1.58361	5945	1.296	11365	4.339	Endothelial cells
scNanoCT&ATAC-seq	H3K9me3	ATAC	WMX-H3K9me3-CA-12#70_1	26928983	5489	4906	5114	4691	4612	91.7286	0.688729	2611	4.224	5239	4.319	Endothelial cells
scNanoCT&ATAC-seq	H3K9me3	ATAC	WMX-H3K9me3-CA-12#70_10	35837588	7179	4992	6606	5886	5773	89.1008	0.909951	3922	1.733	5795	8.429	Endothelial cells
scNanoCT&ATAC-seq	H3K9me3	ATAC	WMX-H3K9me3-CA-12#70_11	74671685	16566	4507.5	15747	14854	14520	94.3291	2.06591	9094	2.012	15669	5.638	Fibroblasts
scNanoCT&ATAC-seq	H3K9me3	ATAC	WMX-H3K9me3-CA-12#70_12	125712297	27600	4554.8	26475	24712	24110	93.3409	3.4882	10730	2.21	30209	4.221	Epithelial cells(Tumor2)
scNanoCT&ATAC-seq	H3K9me3	ATAC	WMX-H3K9me3-CA-12#70_2	119669821	24385	4907.5	23087	21438	20983	92.8575	3.23361	7904	2.363	27609	4.53	Epithelial cells(Tumor1)
scNanoCT&ATAC-seq	H3K9me3	ATAC	WMX-H3K9me3-CA-12#70_3	54001377	14027	3849.8	13291	12160	11917	91.4905	1.41225	6351	1.733	13880	4.061	Fibroblasts
scNanoCT&ATAC-seq	H3K9me3	ATAC	WMX-H3K9me3-CA-12#70_4	57296997	11193	5119	10684	9973	9801	93.3452	1.566	3936	3.819	12751	5.092	Epithelial cells(Tumor2)
scNanoCT&ATAC-seq	H3K9me3	ATAC	WMX-H3K9me3-CA-12#70_5	83251498	17421	4778.8	16748	15726	15403	93.8978	2.30251	10457	2.021	15988	4.344	Fibroblasts
scNanoCT&ATAC-seq	H3K9me3	ATAC	WMX-H3K9me3-CA-12#70_6	90728659	20383	4451.2	17340	16251	15981	93.7197	2.43639	6643	1.523	20434	5.805	Endothelial cells
scNanoCT&ATAC-seq	H3K9me3	ATAC	WMX-H3K9me3-CA-12#70_7	70402191	23347	3015.5	13568	12054	11812	88.8414	1.7729	6866	3.89	13006	6.239	Endothelial cells
scNanoCT&ATAC-seq	H3K9me3	ATAC	WMX-H3K9me3-CA-12#70_8	44491985	12201	3646.6	8386	7693	7543	91.7362	1.1418	2901	1.743	9939	5.941	Endothelial cells
scNanoCT&ATAC-seq	H3K9me3	ATAC	WMX-H3K9me3-CA-12#70_9	112936424	24493	4611	21825	20091	19689	92.055	3.03707	9275	1.553	24033	4.319	Endothelial cells
scNanoCT&ATAC-seq	H3K9me3	ATAC	WMX-H3K9me3-CA-12#71_1	48345560	10239	4721.7	9674	8814	8622	91.1102	1.25223	8231	2.295	6523	7.105	Epithelial cells(Normal)
scNanoCT&ATAC-seq	H3K9me3	ATAC	WMX-H3K9me3-CA-12#71_10	83068244	17134	4848.2	16180	14789	14463	91.403	2.21841	8214	2.818	16188	4.58	Fibroblasts
scNanoCT&ATAC-seq	H3K9me3	ATAC	WMX-H3K9me3-CA-12#71_11	92532512	19752	4684.7	18788	17152	16706	91.2923	2.47761	10340	2.344	17904	5.249	Fibroblasts
scNanoCT&ATAC-seq	H3K9me3	ATAC	WMX-H3K9me3-CA-12#71_4	44614296	8758	5094.1	8385	7647	7508	91.1986	1.17942	4431	2.182	8343	4.617	Epithelial cells(Normal)
scNanoCT&ATAC-seq	H3K9me3	ATAC	WMX-H3K9me3-CA-12#71_6	69677078	19416	3588.6	12594	11148	10963	88.5183	1.65876	4733	3.74	13688	5.302	Endothelial cells
scNanoCT&ATAC-seq	H3K9me3	ATAC	WMX-H3K9me3-CA-12#71_7	80882058	18499	4372.2	15610	14165	13897	90.7431	2.07035	7683	2.796	15451	4.11	Endothelial cells
scNanoCT&ATAC-seq	H3K9me3	ATAC	WMX-H3K9me3-CA-12#71_8	119106616	24909	4781.7	23176	21696	21245	93.6141	3.26413	4455	2.563	31574	4.261	Epithelial cells(Tumor1)
scNanoCT&ATAC-seq	H3K9me3	ATAC	WMX-H3K9me3-CA-12#71_9	124651465	26819	4647.9	24509	22129	21615	90.2893	3.2532	11728	3.022	24551	4.772	Epithelial cells(Tumor1)
scNanoCT&ATAC-seq	H3K9me3	ATAC	WMX-H3K9me3-CA-12#72_1	43639706	8583	5084.4	8132	7387	7235	90.8387	1.13972	3829	5.116	8489	8.054	Endothelial cells
scNanoCT&ATAC-seq	H3K9me3	ATAC	WMX-H3K9me3-CA-12#72_10	76219268	14683	5191	13929	13012	12747	93.4166	2.09388	4012	3.748	17495	4.369	Fibroblasts
scNanoCT&ATAC-seq	H3K9me3	ATAC	WMX-H3K9me3-CA-12#72_11	103380829	20906	4945	19803	18414	17965	92.9859	2.84619	7089	2.94	23052	4.695	Epithelial cells(Tumor2)
scNanoCT&ATAC-seq	H3K9me3	ATAC	WMX-H3K9me3-CA-12#72_12	73741959	14510	5082.1	13790	12850	12558	93.1835	2.02525	6054	3.06	15085	6.099	Endothelial cells
scNanoCT&ATAC-seq	H3K9me3	ATAC	WMX-H3K9me3-CA-12#72_5	36970421	7132	5183.7	6640	5935	5795	89.3825	0.952412	3713	1.792	6032	8.115	Endothelial cells
scNanoCT&ATAC-seq	H3K9me3	ATAC	WMX-H3K9me3-CA-12#72_6	107895005	24810	4348.9	21179	19543	19110	92.2754	2.84751	6807	2.027	25514	4.316	Epithelial cells(Tumor1)
scNanoCT&ATAC-seq	H3K9me3	ATAC	WMX-H3K9me3-CA-12#72_7	52673720	11031	4775.1	9422	8830	8654	93.7168	1.3982	3083	2.8	11347	5.269	Fibroblasts
scNanoCT&ATAC-seq	H3K9me3	ATAC	WMX-H3K9me3-CA-12#72_8	74345308	15373	4836.1	14208	13402	13065	94.3271	2.03057	4422	1.575	17723	4.452	Fibroblasts
scNanoCT&ATAC-seq	H3K9me3	ATAC	WMX-H3K9me3-CA-12#72_9	38551820	7959	4843.8	6834	6181	6075	90.4448	0.97584	3305	4.356	6937	5.518	Endothelial cells
scNanoCT&ATAC-seq	H3K9me3	ATAC	WMX-H3K9me3-CA-13#73_1	95566338	20012	4775.5	19027	17774	17444	93.4146	2.58647	8817	1.33	20516	4.345	Epithelial cells(Tumor1)
scNanoCT&ATAC-seq	H3K9me3	ATAC	WMX-H3K9me3-CA-13#73_10	115419967	23739	4862	22479	20934	20483	93.1269	3.14652	12067	3.53	22531	4.716	Fibroblasts
scNanoCT&ATAC-seq	H3K9me3	ATAC	WMX-H3K9me3-CA-13#73_11	87213853	18267	4774.4	17318	16018	15636	92.4934	2.34388	7994	4.146	18429	4.241	Epithelial cells(Tumor1)
scNanoCT&ATAC-seq	H3K9me3	ATAC	WMX-H3K9me3-CA-13#73_12	103316713	22601	4571.3	21525	19978	19440	92.813	2.7907	15502	2.193	17293	4.267	Epithelial cells(Tumor1)
scNanoCT&ATAC-seq	H3K9me3	ATAC	WMX-H3K9me3-CA-13#73_2	124597164	25667	4854.4	24049	22029	21537	91.6005	3.24988	13810	1.739	22435	4.989	Endothelial cells
scNanoCT&ATAC-seq	H3K9me3	ATAC	WMX-H3K9me3-CA-13#73_5	82594862	16996	4859.7	16361	15248	14952	93.1972	2.25965	5536	1.739	19543	4.185	Epithelial cells(Tumor1)
scNanoCT&ATAC-seq	H3K9me3	ATAC	WMX-H3K9me3-CA-13#73_6	134361750	29747	4516.8	27814	25093	24482	90.2172	3.42684	16216	3.42	24981	4.347	Fibroblasts
scNanoCT&ATAC-seq	H3K9me3	ATAC	WMX-H3K9me3-CA-13#73_7	79124557	16395	4826.1	14733	13548	13286	91.9568	2.04033	6110	1.944	15603	4.852	Epithelial cells(Tumor1)
scNanoCT&ATAC-seq	H3K9me3	ATAC	WMX-H3K9me3-CA-13#73_9	125168858	25607	4888.1	23976	22061	21587	92.0128	3.34371	7709	3.262	28403	4.231	Epithelial cells(Tumor1)
scNanoCT&ATAC-seq	H3K9me3	ATAC	WMX-H3K9me3-CA-13#74_1	85808981	18379	4668.9	17504	16203	15826	92.5674	2.31045	7568	3.224	19272	5.071	Epithelial cells(Tumor1)
scNanoCT&ATAC-seq	H3K9me3	ATAC	WMX-H3K9me3-CA-13#74_10	158214723	32806	4822.7	31376	29581	28924	94.2791	4.42342	12700	1.55	36241	5.19	Epithelial cells(Tumor1)
scNanoCT&ATAC-seq	H3K9me3	ATAC	WMX-H3K9me3-CA-13#74_11	90178038	19994	4510.3	18358	16837	16457	91.7148	2.42595	7385	2.57	20421	4.214	Fibroblasts
scNanoCT&ATAC-seq	H3K9me3	ATAC	WMX-H3K9me3-CA-13#74_12	38550452	8118	4748.8	7702	7218	7082	93.7159	1.03405	3312	1.485	8575	5.368	Endothelial cells
scNanoCT&ATAC-seq	H3K9me3	ATAC	WMX-H3K9me3-CA-13#74_2	62466077	12960	4819.9	11612	10862	10679	93.5412	1.62759	3531	1.707	14477	5.774	Fibroblasts
scNanoCT&ATAC-seq	H3K9me3	ATAC	WMX-H3K9me3-CA-13#74_4	52071884	10858	4795.7	10372	9382	9212	90.4551	1.37601	3755	2.742	11818	4.207	Epithelial cells(Tumor2)
scNanoCT&ATAC-seq	H3K9me3	ATAC	WMX-H3K9me3-CA-13#74_5	49139637	10012	4908.1	9614	8785	8592	91.3772	1.29777	6815	1.496	7837	6.416	Endothelial cells
scNanoCT&ATAC-seq	H3K9me3	ATAC	WMX-H3K9me3-CA-13#74_7	72671274	19421	3741.9	13655	12360	12129	90.5163	1.84625	5693	2.046	14525	4.192	Endothelial cells
scNanoCT&ATAC-seq	H3K9me3	ATAC	WMX-H3K9me3-CA-13#74_8	87973957	18668	4712.6	17366	15922	15596	91.6849	2.35105	4891	2.133	21295	4.035	Epithelial cells(Tumor2)
scNanoCT&ATAC-seq	H3K9me3	ATAC	WMX-H3K9me3-CA-13#74_9	89509865	19786	4523.9	17446	16067	15689	92.0956	2.36494	5905	1.854	20407	4.236	Fibroblasts
scNanoCT&ATAC-seq	H3K9me3	ATAC	WMX-H3K9me3-CA-13#75_1	106607676	24185	4408	22572	20826	20316	92.2648	2.79717	14063	2.648	20271	5.334	Endothelial cells
scNanoCT&ATAC-seq	H3K9me3	ATAC	WMX-H3K9me3-CA-13#75_10	85491704	17682	4835	16569	15339	15025	92.5765	2.29281	5826	2.64	19135	4.526	Epithelial cells(Tumor1)
scNanoCT&ATAC-seq	H3K9me3	ATAC	WMX-H3K9me3-CA-13#75_11	129720107	29965	4329.1	28114	26158	25361	93.0426	3.50395	16336	2.047	26655	4.162	Fibroblasts
scNanoCT&ATAC-seq	H3K9me3	ATAC	WMX-H3K9me3-CA-13#75_12	87226959	18302	4766	17313	16252	15836	93.8717	2.38113	7785	1.673	18834	5.861	Endothelial cells
scNanoCT&ATAC-seq	H3K9me3	ATAC	WMX-H3K9me3-CA-13#75_2	68380474	14643	4669.8	13120	11889	11619	90.6174	1.68131	7991	4.189	11643	6.322	Fibroblasts
scNanoCT&ATAC-seq	H3K9me3	ATAC	WMX-H3K9me3-CA-13#75_4	67897298	14555	4664.9	13975	12581	12306	90.025	1.76732	9180	3.641	11789	5.475	Fibroblasts
scNanoCT&ATAC-seq	H3K9me3	ATAC	WMX-H3K9me3-CA-13#75_5	38067037	7343	5184.1	6985	6507	6381	93.1568	0.984595	3186	2.31	7883	4.76	Endothelial cells
scNanoCT&ATAC-seq	H3K9me3	ATAC	WMX-H3K9me3-CA-13#75_6	65337577	27173	2404.5	11948	10047	9943	84.0894	1.35847	5391	1.697	11371	5.232	Endothelial cells
scNanoCT&ATAC-seq	H3K9me3	ATAC	WMX-H3K9me3-CA-13#75_7	95771994	22017	4349.9	19494	17671	17266	90.6484	2.40355	10425	2.465	18314	4.653	Endothelial cells
scNanoCT&ATAC-seq	H3K9me3	ATAC	WMX-H3K9me3-CA-13#75_9	200235115	45333	4417	42348	38031	36981	89.8059	5.20017	19511	2.428	42801	4.289	Endothelial cells
scNanoCT&ATAC-seq	H3K9me3	ATAC	WMX-H3K9me3-CA-13#76_1	177284084	38526	4601.7	36736	33187	32476	90.3392	4.66042	22454	2.78	32572	5.259	Endothelial cells
scNanoCT&ATAC-seq	H3K9me3	ATAC	WMX-H3K9me3-CA-13#76_10	134391171	29819	4506.9	28284	25657	25039	90.7121	3.60673	19374	2.678	23008	5.066	Epithelial cells(Tumor1)
scNanoCT&ATAC-seq	H3K9me3	ATAC	WMX-H3K9me3-CA-13#76_11	89618598	20766	4315.6	19713	17635	17164	89.4587	2.34813	12888	1.925	16107	4.199	Endothelial cells
[truncated: 1,195 more rows]
