# Supplementary material for: Parallel profiling of genome mutations and multiple chromatin modalities in single cells by scNanoCT&amp;ATAC-seq
Source: Research Square preprint supplement (doi:10.21203/rs.3.rs-8125184/v1), 2026-01-13
Supplement: Supplementary file 2 [file 8faf5377bc374be2baba8d35.xlsx]

## Sheet: Insertion
Table S5. Summary of insertions detected in K562 scNanoCT&ATAC-seq data.
				Supported by individual ATAC-histone dual-modal data
Chrom	Start	End	SVID	H3K27ac	H3K27me3	H3K4me3	H3K9me3	Supported by ONT WGS data
chr1	90065	90566	merge.INS.1	1	1	1	1	1
chr1	136269	137320	merge.INS.2	1	1	1	1	1
chr1	257837	258144	merge.INS.3	0	1	1	0	0
chr1	433233	433553	merge.INS.4	1	1	1	1	0
chr1	433565	434236	merge.INS.5	1	1	1	1	0
chr1	434255	434794	merge.INS.6	1	1	1	1	0
chr1	597801	599283	merge.INS.7	1	1	1	1	1
chr1	609977	610950	merge.INS.8	1	1	1	1	1
chr1	668936	670386	merge.INS.9	1	1	1	1	1
chr1	710581	710915	merge.INS.10	1	1	1	1	1
chr1	727253	727485	merge.INS.11	1	1	1	1	1
chr1	744868	744912	merge.INS.12	1	1	1	1	1
chr1	789483	791868	merge.INS.13	1	1	1	1	1
chr1	820794	821176	merge.INS.14	1	1	1	1	1
chr1	866483	867143	merge.INS.15	1	1	1	1	1
chr1	875881	876299	merge.INS.16	1	1	1	1	1
chr1	878422	879510	merge.INS.17	1	1	1	1	1
chr1	886223	886271	merge.INS.18	1	1	1	1	1
chr1	936236	936472	merge.INS.19	1	1	1	1	1
chr1	948663	948772	merge.INS.20	1	1	1	1	1
chr1	976706	978374	merge.INS.21	1	1	1	1	1
chr1	984613	984647	merge.INS.22	1	1	1	1	0
chr1	988778	988910	merge.INS.23	1	1	1	1	1
chr1	996247	996993	merge.INS.24	1	1	1	1	1
chr1	998734	998851	merge.INS.25	1	1	1	1	1
chr1	1029377	1029473	merge.INS.26	1	1	1	1	1
chr1	1065026	1065126	merge.INS.27	1	1	1	1	0
chr1	1068734	1068914	merge.INS.28	1	1	1	1	1
chr1	1076202	1079783	merge.INS.29	1	1	1	1	1
chr1	1080636	1081253	merge.INS.30	1	1	1	1	1
chr1	1141365	1141475	merge.INS.31	1	1	1	1	1
chr1	1184570	1185309	merge.INS.32	1	1	1	1	1
chr1	1192607	1192963	merge.INS.33	1	1	1	1	1
chr1	1201769	1203014	merge.INS.34	1	1	1	1	1
chr1	1240650	1240787	merge.INS.35	1	1	1	1	1
chr1	1248711	1250195	merge.INS.36	1	1	1	1	1
chr1	1339867	1340015	merge.INS.37	1	1	1	1	1
chr1	1351168	1351286	merge.INS.38	1	1	1	0	0
chr1	1351405	1351483	merge.INS.39	1	1	1	1	0
chr1	1382215	1384170	merge.INS.40	1	1	1	1	1
chr1	1442840	1442982	merge.INS.41	1	1	1	1	1
chr1	1477847	1478129	merge.INS.42	1	1	1	1	1
chr1	1749586	1749692	merge.INS.43	1	1	1	1	1
chr1	1924217	1924352	merge.INS.44	1	1	1	1	1
chr1	1929365	1930444	merge.INS.45	1	0	1	1	1
chr1	1934262	1934331	merge.INS.46	1	1	1	1	1
chr1	1934337	1934407	merge.INS.47	1	1	1	1	1
chr1	1948875	1949216	merge.INS.48	1	1	1	1	1
chr1	1955017	1955133	merge.INS.49	1	1	1	1	1
chr1	1981397	1982492	merge.INS.50	1	1	1	1	1
chr1	1993703	1993886	merge.INS.51	1	1	1	1	1
chr1	2085573	2085933	merge.INS.52	1	1	1	1	1
chr1	2106392	2106950	merge.INS.53	1	1	1	1	1
chr1	2121485	2121571	merge.INS.54	1	1	1	1	1
chr1	2121585	2124801	merge.INS.55	1	1	1	1	1
chr1	2147645	2147959	merge.INS.56	1	1	1	1	1
chr1	2211673	2212656	merge.INS.57	1	1	1	1	1
chr1	2281128	2281326	merge.INS.58	1	1	0	1	0
chr1	2281345	2281534	merge.INS.59	0	1	1	1	1
chr1	2281596	2281805	merge.INS.60	1	1	0	1	0
chr1	2281928	2282145	merge.INS.61	1	1	1	1	1
chr1	2289506	2289676	merge.INS.62	1	1	1	1	1
chr1	2325098	2329279	merge.INS.63	1	1	1	1	1
chr1	2331825	2332149	merge.INS.64	1	1	1	1	1
chr1	2393016	2393102	merge.INS.65	1	1	1	1	1
chr1	2401332	2401571	merge.INS.66	1	1	1	1	1
chr1	2440386	2443272	merge.INS.67	1	1	1	1	1
chr1	2450678	2450814	merge.INS.68	1	1	1	1	1
chr1	2483754	2483879	merge.INS.69	1	1	1	1	0
chr1	2522670	2523448	merge.INS.70	1	1	1	1	1
chr1	2634971	2635208	merge.INS.71	1	1	1	1	1
chr1	2650662	2650759	merge.INS.72	1	1	0	1	0
chr1	2650968	2651213	merge.INS.73	1	1	0	1	0
chr1	2651326	2651396	merge.INS.74	0	1	1	1	0
chr1	2651553	2653227	merge.INS.75	1	1	1	1	1
chr1	2653316	2654871	merge.INS.76	1	1	1	1	1
chr1	2654940	2655085	merge.INS.77	1	1	1	1	0
chr1	2655163	2655857	merge.INS.78	1	1	1	1	1
chr1	2656275	2656862	merge.INS.79	1	1	1	1	1
chr1	2657141	2657302	merge.INS.80	0	1	1	1	0
chr1	2657440	2657578	merge.INS.81	0	1	1	0	0
chr1	2658136	2658326	merge.INS.82	1	1	1	1	1
chr1	2658449	2658645	merge.INS.83	1	1	1	1	1
chr1	2661260	2661315	merge.INS.84	1	1	1	1	0
chr1	2662317	2662402	merge.INS.85	1	1	1	1	1
chr1	2662783	2662833	merge.INS.86	0	1	1	1	0
chr1	2666903	2667018	merge.INS.87	0	1	1	1	0
chr1	2668493	2668531	merge.INS.88	0	1	1	1	0
chr1	2672577	2673134	merge.INS.89	1	1	1	1	1
chr1	2673723	2673880	merge.INS.90	1	1	1	1	0
chr1	2678880	2678955	merge.INS.91	0	1	1	0	1
chr1	2679372	2679493	merge.INS.92	0	1	1	0	0
chr1	2679958	2680022	merge.INS.93	1	0	1	0	1
chr1	2680189	2680437	merge.INS.94	1	1	1	0	0
chr1	2680477	2680623	merge.INS.95	1	1	1	0	0
chr1	2680944	2681184	merge.INS.96	1	1	1	1	1
chr1	2681209	2681558	merge.INS.97	1	1	1	1	1
chr1	2681842	2682000	merge.INS.98	1	1	1	1	0
chr1	2682092	2682347	merge.INS.99	0	1	0	1	0
chr1	2682361	2682543	merge.INS.100	1	1	1	1	0
chr1	2682548	2684073	merge.INS.101	1	1	1	1	1
chr1	2684338	2684455	merge.INS.102	1	1	1	0	0
chr1	2684536	2684856	merge.INS.103	1	1	1	1	1
chr1	2684943	2685113	merge.INS.104	1	1	1	1	0
chr1	2685168	2686326	merge.INS.105	1	1	1	1	1
chr1	2686761	2686898	merge.INS.106	1	1	0	1	1
chr1	2687289	2687811	merge.INS.107	1	1	1	1	1
chr1	2687944	2687985	merge.INS.108	1	1	1	0	0
chr1	2688192	2688522	merge.INS.109	1	1	1	1	1
chr1	2688875	2689200	merge.INS.110	1	1	1	1	1
chr1	2689313	2689438	merge.INS.111	1	1	0	1	0
chr1	2689895	2690042	merge.INS.112	1	1	1	0	0
chr1	2690297	2690384	merge.INS.113	1	1	1	1	0
chr1	2690695	2690753	merge.INS.114	1	1	1	0	0
chr1	2690783	2690865	merge.INS.115	1	1	1	0	0
chr1	2691263	2691518	merge.INS.116	1	1	1	1	1
chr1	2691532	2691587	merge.INS.117	0	1	1	0	0
chr1	2692349	2695156	merge.INS.118	0	1	1	1	1
chr1	2695360	2695497	merge.INS.119	1	1	1	0	1
chr1	2695659	2695780	merge.INS.120	1	1	1	0	0
chr1	2697598	2697653	merge.INS.121	1	1	1	0	1
chr1	2697689	2697814	merge.INS.122	1	1	1	1	0
chr1	2698263	2698503	merge.INS.123	1	1	1	1	1
chr1	2698888	2699063	merge.INS.124	1	1	1	1	1
chr1	2699379	2699535	merge.INS.125	1	1	1	1	1
chr1	2699651	2699878	merge.INS.126	1	1	0	1	0
chr1	2748085	2748149	merge.INS.127	1	1	0	1	0
chr1	2749064	2749139	merge.INS.128	1	1	1	0	0
chr1	2750047	2750094	merge.INS.129	0	1	1	0	0
chr1	2750704	2750774	merge.INS.130	0	1	1	0	0
chr1	2750883	2750974	merge.INS.131	1	1	0	1	0
chr1	2751852	2751932	merge.INS.132	0	1	1	0	0
chr1	2752009	2752090	merge.INS.133	0	1	1	0	0
chr1	2754643	2754711	merge.INS.134	1	1	1	1	0
chr1	2756390	2756447	merge.INS.135	1	1	1	1	0
chr1	2756610	2756908	merge.INS.136	0	1	0	1	0
chr1	2758511	2758603	merge.INS.137	1	1	1	1	0
chr1	2759222	2759443	merge.INS.138	1	1	1	1	0
chr1	2759491	2759556	merge.INS.139	0	1	1	1	0
chr1	2759839	2760019	merge.INS.140	1	1	1	1	0
chr1	2760292	2760489	merge.INS.141	0	1	1	1	0
chr1	2848873	2850371	merge.INS.142	1	1	1	1	1
chr1	2859184	2862736	merge.INS.143	1	1	1	1	1
chr1	2863184	2863323	merge.INS.144	1	1	1	1	1
chr1	2877543	2877674	merge.INS.145	1	1	1	1	1
chr1	2977315	2977957	merge.INS.146	1	1	1	1	1
chr1	3016665	3017292	merge.INS.147	1	1	1	1	1
chr1	3026040	3026459	merge.INS.148	1	1	1	1	1
chr1	3037752	3037956	merge.INS.149	1	1	1	1	1
chr1	3042644	3042712	merge.INS.150	1	1	1	1	1
chr1	3111467	3111519	merge.INS.151	1	1	1	1	1
chr1	3162850	3163614	merge.INS.152	1	1	1	1	1
chr1	3167539	3168451	merge.INS.153	1	1	1	1	1
chr1	3176048	3176533	merge.INS.154	1	1	1	1	1
chr1	3180989	3182286	merge.INS.155	1	1	1	1	1
chr1	3255846	3255943	merge.INS.156	1	1	1	1	1
chr1	3260694	3261616	merge.INS.157	1	1	1	1	1
chr1	3269705	3269938	merge.INS.158	1	1	1	1	1
chr1	3270680	3270769	merge.INS.159	1	1	1	1	1
chr1	3287347	3287553	merge.INS.160	1	1	1	1	0
chr1	3351522	3352399	merge.INS.161	1	1	1	1	1
chr1	3428138	3428485	merge.INS.162	1	1	1	1	1
chr1	3450455	3450700	merge.INS.163	1	1	1	1	1
chr1	3474907	3475886	merge.INS.164	1	1	1	1	1
chr1	3501959	3504653	merge.INS.165	1	1	1	1	1
chr1	3510335	3510644	merge.INS.166	1	1	1	1	1
chr1	3578744	3579020	merge.INS.167	1	1	1	1	1
chr1	3583261	3585073	merge.INS.168	1	1	1	1	1
chr1	3587842	3588485	merge.INS.169	1	1	1	1	1
chr1	3693687	3695588	merge.INS.170	1	1	1	1	1
chr1	3706335	3706608	merge.INS.171	1	1	1	1	1
chr1	3820462	3820555	merge.INS.172	1	1	1	1	1
chr1	3868585	3869026	merge.INS.173	1	1	1	1	1
chr1	3929455	3929846	merge.INS.174	1	1	1	1	0
chr1	4016901	4017236	merge.INS.175	1	1	1	1	1
chr1	4077246	4079028	merge.INS.176	1	1	1	1	1
chr1	4099930	4100120	merge.INS.177	1	1	1	1	1
chr1	4100175	4100319	merge.INS.178	1	1	1	1	0
chr1	4136341	4137115	merge.INS.179	1	1	1	1	1
chr1	4144325	4145631	merge.INS.180	1	1	1	1	1
chr1	4162701	4163180	merge.INS.181	1	1	1	1	1
chr1	4331736	4332332	merge.INS.182	1	1	1	1	1
chr1	4333296	4335311	merge.INS.183	1	1	1	1	1
chr1	4336446	4337140	merge.INS.184	1	1	1	1	1
chr1	4600169	4600268	merge.INS.185	1	1	1	1	1
chr1	4632535	4633943	merge.INS.186	1	1	1	1	1
chr1	4729580	4729630	merge.INS.187	1	1	1	1	1
chr1	4740357	4740566	merge.INS.188	1	1	1	1	1
chr1	4939472	4941351	merge.INS.189	1	1	1	1	1
chr1	4969175	4969254	merge.INS.190	1	1	1	1	0
chr1	5075710	5075809	merge.INS.191	1	1	1	1	1
chr1	5112348	5112996	merge.INS.192	1	1	1	1	1
chr1	5160171	5160942	merge.INS.193	1	1	1	1	1
chr1	5225280	5225325	merge.INS.194	1	1	1	1	1
chr1	5334065	5334922	merge.INS.195	1	1	1	1	1
chr1	5387168	5392386	merge.INS.196	1	1	1	1	1
chr1	5404901	5405053	merge.INS.197	1	1	1	1	1
chr1	5430409	5430520	merge.INS.198	1	1	1	1	1
chr1	5701728	5701839	merge.INS.199	1	1	1	1	1
chr1	5713525	5713886	merge.INS.200	1	1	1	1	1
chr1	5802856	5803321	merge.INS.201	1	1	1	1	1
chr1	5817208	5817663	merge.INS.202	1	1	1	1	1
chr1	5829787	5830211	merge.INS.203	1	1	1	1	1
chr1	5949345	5949389	merge.INS.204	1	1	1	0	0
chr1	5964943	5964986	merge.INS.205	1	1	1	1	1
chr1	6004949	6005071	merge.INS.206	1	1	1	1	0
chr1	6005079	6005238	merge.INS.207	1	1	1	1	0
chr1	6005346	6005499	merge.INS.208	1	1	1	1	1
chr1	6006122	6006754	merge.INS.209	1	1	0	0	1
chr1	6012499	6012576	merge.INS.210	1	1	1	1	1
chr1	6107543	6107676	merge.INS.211	1	1	1	1	1
chr1	6160133	6160600	merge.INS.212	1	1	1	1	1
chr1	6188781	6189128	merge.INS.213	1	1	1	1	1
chr1	6715521	6715645	merge.INS.214	1	1	1	1	1
chr1	6717436	6717470	merge.INS.215	1	0	0	1	0
chr1	6719427	6720173	merge.INS.216	1	1	1	1	1
chr1	6742487	6744518	merge.INS.217	1	1	1	1	1
chr1	6897474	6897509	merge.INS.218	1	1	1	1	1
chr1	6937515	6937797	merge.INS.219	1	1	1	1	1
chr1	6940905	6941797	merge.INS.220	1	1	1	1	1
chr1	6983991	6984311	merge.INS.221	1	1	1	1	1
chr1	7139240	7139323	merge.INS.222	1	1	1	1	1
chr1	7515010	7515237	merge.INS.223	1	1	1	1	1
chr1	7680863	7680914	merge.INS.224	1	1	1	1	1
chr1	7856598	7856666	merge.INS.225	1	1	1	1	1
chr1	7857093	7857177	merge.INS.226	1	1	1	1	1
chr1	7862992	7863212	merge.INS.227	1	1	1	1	1
chr1	7903041	7903476	merge.INS.228	1	1	1	1	1
chr1	7952989	7953246	merge.INS.229	1	1	1	1	1
chr1	8026908	8027190	merge.INS.230	1	1	1	1	1
chr1	8216988	8217204	merge.INS.231	1	1	1	1	1
chr1	8276857	8277655	merge.INS.232	1	1	1	1	1
chr1	8321893	8322963	merge.INS.233	1	1	1	1	1
chr1	8331229	8331616	merge.INS.234	1	1	1	1	1
chr1	8344665	8345236	merge.INS.235	1	1	1	1	1
chr1	8386569	8386886	merge.INS.236	1	1	1	1	1
chr1	8501367	8501472	merge.INS.237	1	1	1	1	1
chr1	8501811	8502794	merge.INS.238	1	1	1	1	1
chr1	8984259	8984302	merge.INS.239	1	1	0	1	0
chr1	9053354	9053694	merge.INS.240	1	1	1	1	1
chr1	9116127	9116462	merge.INS.241	1	1	1	1	1
chr1	9129259	9129360	merge.INS.242	1	0	0	1	1
chr1	9170367	9170691	merge.INS.243	1	1	1	1	1
chr1	9282516	9282783	merge.INS.244	0	1	1	1	1
chr1	9380198	9380305	merge.INS.245	1	0	1	1	0
chr1	9411104	9412763	merge.INS.246	1	1	1	1	1
chr1	9623141	9630488	merge.INS.247	1	1	1	1	1
chr1	9968553	9968697	merge.INS.248	1	1	1	1	1
chr1	10187594	10187945	merge.INS.249	1	1	1	1	1
chr1	10188086	10188368	merge.INS.250	1	1	1	1	1
chr1	10744346	10745026	merge.INS.251	1	1	1	1	1
chr1	10785133	10785229	merge.INS.252	1	1	1	1	1
chr1	10817945	10818076	merge.INS.253	1	1	1	1	1
chr1	10970869	10972984	merge.INS.254	1	1	1	1	1
chr1	10988058	10988179	merge.INS.255	1	1	1	1	1
chr1	11041731	11042098	merge.INS.256	1	1	1	1	1
chr1	11069246	11069350	merge.INS.257	1	1	1	1	1
chr1	11264865	11264926	merge.INS.258	1	1	1	1	1
chr1	11373841	11375169	merge.INS.259	1	1	1	1	1
chr1	11465141	11465180	merge.INS.260	0	1	0	1	1
chr1	11465196	11465234	merge.INS.261	0	0	1	1	1
chr1	11522525	11524039	merge.INS.262	1	1	1	1	1
chr1	11641683	11641800	merge.INS.263	1	1	1	1	1
chr1	11882730	11882790	merge.INS.264	1	1	1	1	1
chr1	11967595	11967717	merge.INS.265	1	1	1	1	1
chr1	12565677	12566412	merge.INS.266	1	1	1	1	1
chr1	13037930	13037984	merge.INS.267	1	1	1	1	0
chr1	13190806	13190923	merge.INS.268	1	1	1	1	1
chr1	13224531	13224627	merge.INS.269	1	1	1	1	1
chr1	13239709	13239809	merge.INS.270	1	1	1	1	1
chr1	13327500	13327577	merge.INS.271	0	1	1	1	0
chr1	13327587	13327723	merge.INS.272	1	1	1	1	1
chr1	13470154	13470832	merge.INS.273	1	1	1	1	1
chr1	13522108	13522437	merge.INS.274	1	1	1	1	1
chr1	13658345	13658683	merge.INS.275	1	1	1	1	1
chr1	13981099	13981250	merge.INS.276	1	1	1	1	1
chr1	14109969	14110015	merge.INS.277	1	1	1	1	0
chr1	14492664	14494109	merge.INS.278	1	1	1	1	1
chr1	14514344	14514601	merge.INS.279	1	1	1	1	1
chr1	14695510	14695559	merge.INS.280	0	0	1	1	0
chr1	14867955	14868028	merge.INS.281	1	1	1	1	1
chr1	14883344	14883412	merge.INS.282	1	0	1	1	1
chr1	15036250	15036371	merge.INS.283	1	1	1	1	1
chr1	15314631	15315075	merge.INS.284	1	1	1	1	1
chr1	16050022	16050110	merge.INS.285	1	1	1	1	1
chr1	16089601	16089664	merge.INS.286	1	1	1	1	1
chr1	16192780	16192820	merge.INS.287	1	1	1	1	1
chr1	16424207	16424343	merge.INS.288	1	1	1	1	1
chr1	16539693	16540031	merge.INS.289	1	1	1	1	1
chr1	16683077	16683125	merge.INS.290	1	1	1	1	0
chr1	16701408	16701514	merge.INS.291	1	1	1	1	1
chr1	16730664	16730767	merge.INS.292	1	1	1	1	1
chr1	17166200	17166845	merge.INS.293	1	1	1	1	1
chr1	17208501	17208671	merge.INS.294	1	1	1	1	1
chr1	17241453	17241736	merge.INS.295	1	1	1	1	1
chr1	17289305	17292016	merge.INS.296	1	1	1	1	1
chr1	17292884	17293032	merge.INS.297	1	1	1	1	1
chr1	17437664	17437763	merge.INS.298	1	1	1	1	1
chr1	17859596	17859896	merge.INS.299	1	1	1	1	1
chr1	17868628	17868705	merge.INS.300	1	1	1	1	1
chr1	17897464	17897672	merge.INS.301	1	1	1	1	1
chr1	18049211	18054396	merge.INS.302	1	1	1	1	1
chr1	18281115	18281231	merge.INS.303	1	1	1	1	1
chr1	18359362	18359432	merge.INS.304	1	1	1	1	1
chr1	18359466	18359587	merge.INS.305	0	1	0	1	1
chr1	18466039	18466179	merge.INS.306	1	1	1	1	1
chr1	18925789	18926001	merge.INS.307	1	1	1	1	0
chr1	18926002	18926229	merge.INS.308	1	1	1	1	1
chr1	19060285	19060493	merge.INS.309	1	1	1	1	1
chr1	19060553	19060662	merge.INS.310	1	0	1	1	0
chr1	19061300	19063011	merge.INS.311	1	1	1	1	1
chr1	19932930	19933263	merge.INS.312	1	1	1	1	1
chr1	20382416	20382913	merge.INS.313	1	1	1	1	1
chr1	20463514	20464460	merge.INS.314	1	1	1	1	1
chr1	20618245	20618583	merge.INS.315	1	1	1	1	1
chr1	20623731	20625037	merge.INS.316	1	1	1	1	1
chr1	20712535	20713183	merge.INS.317	1	1	1	1	1
chr1	20815882	20816152	merge.INS.318	1	1	1	1	0
chr1	20816226	20816442	merge.INS.319	1	1	1	1	1
chr1	20965634	20965708	merge.INS.320	1	1	1	1	1
chr1	21166097	21166430	merge.INS.321	1	1	1	1	1
chr1	21179762	21180437	merge.INS.322	1	1	1	1	1
chr1	21418531	21418578	merge.INS.323	1	1	1	1	1
chr1	21479820	21479882	merge.INS.324	1	0	1	1	1
chr1	21502626	21502848	merge.INS.325	1	1	1	1	1
chr1	21552087	21552185	merge.INS.326	1	1	1	1	1
chr1	21660341	21660488	merge.INS.327	1	1	1	1	1
chr1	22431247	22431427	merge.INS.328	1	1	1	1	1
chr1	22570442	22570628	merge.INS.329	1	1	1	1	1
chr1	22577696	22579336	merge.INS.330	1	1	1	1	1
chr1	22754819	22755519	merge.INS.331	1	1	1	1	1
chr1	22950443	22950711	merge.INS.332	1	1	1	1	1
chr1	23218510	23218579	merge.INS.333	1	1	1	1	1
chr1	23392345	23393777	merge.INS.334	1	1	1	1	1
chr1	23495223	23495325	merge.INS.335	1	1	1	1	1
chr1	23654639	23654979	merge.INS.336	1	1	1	1	1
chr1	23703840	23703893	merge.INS.337	1	1	1	1	1
chr1	23710714	23711135	merge.INS.338	1	1	1	1	1
chr1	23837041	23837808	merge.INS.339	1	1	1	1	1
chr1	23884347	23886503	merge.INS.340	1	1	1	1	1
chr1	23899812	23900094	merge.INS.341	1	1	1	1	1
chr1	23935670	23935811	merge.INS.342	1	1	1	1	1
chr1	24010994	24011177	merge.INS.343	1	1	1	1	1
chr1	24211932	24212861	merge.INS.344	1	1	1	1	1
chr1	24219124	24219180	merge.INS.345	1	1	1	1	1
chr1	24344959	24345513	merge.INS.346	1	1	1	1	1
chr1	24614775	24615106	merge.INS.347	1	1	1	1	1
chr1	24634698	24635341	merge.INS.348	1	1	1	1	1
chr1	24884916	24884947	merge.INS.349	0	1	1	1	0
chr1	25044977	25045089	merge.INS.350	0	1	0	1	1
chr1	25054231	25054583	merge.INS.351	1	1	1	1	1
chr1	25108858	25108947	merge.INS.352	1	1	1	1	1
chr1	25111834	25111876	merge.INS.353	1	1	1	1	1
chr1	25166945	25167057	merge.INS.354	1	1	1	1	1
chr1	25287777	25287902	merge.INS.355	1	1	1	1	0
chr1	25405594	25405724	merge.INS.356	1	1	1	1	1
chr1	25462795	25462847	merge.INS.357	1	1	1	1	1
chr1	25529501	25530474	merge.INS.358	1	1	1	1	1
chr1	25767875	25767951	merge.INS.359	1	1	1	1	1
chr1	25768266	25768369	merge.INS.360	1	1	1	1	1
chr1	26133294	26133356	merge.INS.361	1	1	1	1	1
chr1	26206483	26206579	merge.INS.362	1	1	1	1	1
chr1	26399805	26400273	merge.INS.363	1	1	1	1	1
chr1	26488592	26488649	merge.INS.364	1	1	1	0	0
chr1	26512376	26512438	merge.INS.365	1	1	1	1	0
chr1	26650697	26650863	merge.INS.366	1	1	1	1	1
chr1	26818612	26819177	merge.INS.367	1	1	1	1	1
chr1	26824987	26825061	merge.INS.368	1	1	1	1	0
chr1	26904037	26904371	merge.INS.369	1	1	1	1	1
chr1	26936136	26936176	merge.INS.370	1	1	1	1	0
chr1	27030479	27031227	merge.INS.371	1	1	1	1	1
chr1	27086481	27087685	merge.INS.372	1	1	1	1	1
chr1	27107085	27108454	merge.INS.373	1	1	1	1	1
chr1	27165823	27165867	merge.INS.374	1	1	1	1	1
chr1	27878442	27879878	merge.INS.375	1	1	1	1	1
chr1	27916992	27917185	merge.INS.376	1	0	1	0	0
chr1	28247128	28247297	merge.INS.377	1	1	1	1	1
chr1	28410090	28410342	merge.INS.378	1	1	1	1	1
chr1	28935440	28935516	merge.INS.379	1	1	1	1	1
chr1	29100315	29100647	merge.INS.380	1	1	1	1	1
chr1	29453780	29453832	merge.INS.381	1	1	0	1	0
chr1	29518726	29518807	merge.INS.382	1	1	1	1	1
chr1	29553850	29554194	merge.INS.383	1	1	1	1	1
chr1	29687741	29687790	merge.INS.384	1	1	1	1	1
chr1	29723851	29724252	merge.INS.385	1	1	1	1	1
chr1	29771313	29772094	merge.INS.386	1	1	1	1	1
chr1	29873202	29873597	merge.INS.387	1	1	1	1	1
chr1	29905641	29905771	merge.INS.388	1	1	1	1	1
chr1	30036647	30036743	merge.INS.389	1	1	1	1	1
chr1	30096575	30096780	merge.INS.390	1	1	1	1	1
chr1	30191438	30191537	merge.INS.391	1	1	1	1	1
chr1	30301364	30301485	merge.INS.392	1	1	1	1	1
chr1	30365620	30365685	merge.INS.393	0	1	1	1	0
chr1	30405670	30409610	merge.INS.394	1	1	1	1	1
chr1	30488709	30489044	merge.INS.395	1	1	1	1	1
chr1	30519683	30519783	merge.INS.396	1	1	1	1	1
chr1	30597755	30597889	merge.INS.397	1	1	1	1	1
chr1	30651436	30652403	merge.INS.398	1	1	1	1	1
chr1	30655249	30656094	merge.INS.399	1	1	1	1	1
chr1	30791437	30791539	merge.INS.400	1	1	1	1	1
chr1	31232426	31232530	merge.INS.401	1	1	1	1	1
chr1	31252022	31252088	merge.INS.402	1	1	1	1	1
chr1	31345547	31345648	merge.INS.403	1	1	1	1	1
chr1	31386862	31387012	merge.INS.404	1	1	1	1	1
chr1	31431737	31435366	merge.INS.405	1	1	1	1	1
chr1	31469832	31469935	merge.INS.406	1	1	1	1	1
chr1	31495040	31495542	merge.INS.407	1	1	1	1	1
chr1	31516086	31516190	merge.INS.408	1	1	1	1	1
chr1	31580213	31580307	merge.INS.409	1	1	1	1	0
chr1	31817122	31817163	merge.INS.410	1	1	1	1	1
chr1	32539741	32539971	merge.INS.411	1	1	1	1	1
chr1	32581156	32581827	merge.INS.412	1	1	1	1	1
chr1	32728269	32732656	merge.INS.413	1	1	1	1	1
chr1	33052353	33052633	merge.INS.414	1	1	1	1	1
chr1	33186812	33189352	merge.INS.415	1	1	1	1	1
chr1	33236552	33236591	merge.INS.416	1	1	1	1	0
chr1	33238328	33238395	merge.INS.417	1	1	1	1	1
chr1	33393722	33393777	merge.INS.418	1	1	1	1	1
chr1	33584688	33584756	merge.INS.419	1	1	1	1	1
chr1	33864901	33865198	merge.INS.420	1	1	1	1	1
chr1	34541454	34542387	merge.INS.421	1	1	1	1	1
chr1	34839288	34839427	merge.INS.422	1	1	1	1	1
chr1	34906009	34906072	merge.INS.423	1	1	1	1	1
chr1	35156762	35158237	merge.INS.424	1	1	1	1	1
chr1	35260189	35260800	merge.INS.425	1	1	1	1	1
chr1	35658877	35658909	merge.INS.426	1	1	1	1	0
chr1	36210700	36210916	merge.INS.427	1	1	1	1	1
chr1	36496677	36496741	merge.INS.428	1	1	1	1	1
chr1	36544874	36545250	merge.INS.429	1	1	1	1	1
chr1	36688480	36689077	merge.INS.430	1	1	1	1	1
chr1	36750196	36750539	merge.INS.431	1	1	1	1	1
chr1	36793720	36794627	merge.INS.432	1	1	1	1	1
chr1	36957315	36957844	merge.INS.433	1	1	1	1	1
chr1	37102855	37103128	merge.INS.434	1	1	1	1	1
chr1	37128247	37128593	merge.INS.435	1	1	1	1	1
chr1	37131754	37131977	merge.INS.436	1	1	1	1	1
chr1	37446059	37446913	merge.INS.437	1	1	1	1	1
chr1	37775712	37778165	merge.INS.438	1	1	1	1	1
chr1	37941960	37942013	merge.INS.439	1	1	1	1	1
chr1	37967095	37967427	merge.INS.440	1	1	1	1	1
chr1	38253673	38253765	merge.INS.441	1	1	1	1	1
chr1	38485068	38485153	merge.INS.442	1	1	1	1	1
chr1	38757091	38757153	merge.INS.443	1	1	1	1	1
chr1	38882299	38882432	merge.INS.444	1	1	1	1	1
chr1	38945690	38947820	merge.INS.445	1	1	1	1	1
chr1	39044560	39044797	merge.INS.446	1	1	1	1	1
chr1	39187850	39187960	merge.INS.447	1	1	1	1	0
chr1	39234469	39235184	merge.INS.448	1	1	1	1	1
chr1	39480078	39480161	merge.INS.449	1	1	1	1	1
chr1	39504280	39505406	merge.INS.450	1	1	1	1	1
chr1	39601576	39601626	merge.INS.451	1	1	1	1	1
chr1	39664494	39665247	merge.INS.452	1	0	1	1	1
chr1	39888756	39889095	merge.INS.453	1	1	1	1	1
chr1	40050398	40050538	merge.INS.454	1	1	1	1	1
chr1	41053121	41053154	merge.INS.455	1	1	1	1	1
chr1	41369868	41369934	merge.INS.456	1	1	1	1	1
chr1	41382195	41382412	merge.INS.457	1	1	1	1	1
chr1	41425118	41425741	merge.INS.458	1	1	1	1	1
chr1	41426186	41426401	merge.INS.459	1	1	1	1	1
chr1	41544634	41545779	merge.INS.460	1	1	1	1	1
chr1	41561741	41561794	merge.INS.461	1	1	1	1	1
chr1	42110186	42110258	merge.INS.462	1	1	1	1	1
chr1	42324040	42324226	merge.INS.463	1	1	1	1	1
chr1	42367142	42367182	merge.INS.464	1	1	1	1	1
chr1	42535695	42535789	merge.INS.465	1	1	1	1	1
chr1	42546394	42546564	merge.INS.466	1	1	1	1	1
chr1	42557638	42557720	merge.INS.467	1	1	1	1	1
chr1	42722632	42722938	merge.INS.468	1	1	1	1	1
chr1	43308459	43308546	merge.INS.469	1	1	1	1	1
chr1	43423481	43423645	merge.INS.470	1	1	1	1	1
chr1	43593626	43594111	merge.INS.471	0	0	1	1	0
chr1	43594264	43594444	merge.INS.472	1	1	1	1	1
chr1	43904831	43905453	merge.INS.473	1	1	1	1	1
chr1	43905536	43905769	merge.INS.474	1	1	1	1	1
chr1	43906116	43906302	merge.INS.475	1	1	1	1	1
chr1	43911521	43911787	merge.INS.476	1	1	1	1	1
chr1	44139012	44139149	merge.INS.477	1	1	1	1	1
chr1	44612963	44613452	merge.INS.478	1	1	1	1	1
chr1	44738046	44738114	merge.INS.479	1	1	1	1	1
chr1	44794944	44795010	merge.INS.480	1	1	1	1	0
chr1	44795654	44795912	merge.INS.481	1	1	1	1	1
chr1	44796251	44796370	merge.INS.482	1	1	1	1	1
chr1	44814129	44814264	merge.INS.483	1	1	1	1	1
chr1	44816564	44816992	merge.INS.484	1	1	1	1	1
chr1	44876550	44877149	merge.INS.485	1	1	1	1	1
chr1	44942379	44942517	merge.INS.486	1	1	1	1	1
chr1	45044746	45044872	merge.INS.487	1	1	1	1	1
chr1	45330024	45330364	merge.INS.488	1	1	1	1	1
chr1	45422761	45422794	merge.INS.489	1	1	1	1	1
chr1	45497628	45498468	merge.INS.490	1	1	1	1	1
chr1	45703204	45706159	merge.INS.491	1	1	1	1	1
chr1	45710250	45712619	merge.INS.492	1	1	1	1	1
chr1	46071714	46071862	merge.INS.493	1	1	1	1	1
chr1	46213360	46213713	merge.INS.494	1	1	1	1	1
chr1	46242153	46242735	merge.INS.495	1	1	1	1	1
chr1	46443336	46443441	merge.INS.496	1	1	1	1	0
chr1	46776297	46776842	merge.INS.497	1	1	1	1	1
chr1	47179091	47179260	merge.INS.498	1	1	1	1	1
chr1	47184282	47185583	merge.INS.499	1	1	1	1	1
chr1	47592606	47592680	merge.INS.500	1	1	1	1	1
chr1	47743129	47743645	merge.INS.501	1	1	1	1	1
chr1	47863374	47863408	merge.INS.502	1	1	1	1	0
chr1	48192960	48193083	merge.INS.503	1	1	1	1	1
chr1	48244720	48244938	merge.INS.504	1	1	1	1	1
chr1	49947953	49948106	merge.INS.505	1	1	1	1	1
chr1	50369177	50369872	merge.INS.506	1	1	1	1	1
chr1	50381562	50381716	merge.INS.507	1	1	1	1	1
chr1	50381815	50382193	merge.INS.508	1	1	1	1	1
chr1	50382222	50382334	merge.INS.509	1	1	1	1	1
chr1	51711304	51711873	merge.INS.510	1	1	1	1	1
chr1	51804413	51804772	merge.INS.511	1	1	1	1	1
chr1	51852517	51853162	merge.INS.512	1	1	1	1	1
chr1	51961675	51964446	merge.INS.513	1	1	1	1	1
chr1	52776231	52776269	merge.INS.514	1	1	1	1	1
chr1	52869939	52870087	merge.INS.515	1	1	1	1	1
chr1	53099175	53099329	merge.INS.516	1	1	1	1	1
chr1	53173402	53173692	merge.INS.517	1	1	1	1	0
chr1	53283408	53285677	merge.INS.518	1	1	1	1	1
chr1	53556541	53556740	merge.INS.519	1	1	1	1	1
chr1	53709369	53709442	merge.INS.520	0	1	0	1	0
chr1	53713109	53713892	merge.INS.521	1	1	1	1	1
chr1	53745893	53745970	merge.INS.522	1	1	1	1	1
chr1	54458771	54459102	merge.INS.523	1	1	1	1	1
chr1	54510614	54510995	merge.INS.524	1	1	1	1	1
chr1	54561640	54562160	merge.INS.525	1	1	1	1	1
chr1	54625166	54625220	merge.INS.526	1	1	1	1	1
chr1	54808978	54809111	merge.INS.527	1	1	1	1	1
chr1	54935383	54935467	merge.INS.528	1	1	1	1	1
chr1	55002898	55003732	merge.INS.529	1	1	1	1	1
chr1	55240234	55241852	merge.INS.530	1	1	1	1	1
chr1	55662425	55663032	merge.INS.531	1	1	1	1	1
chr1	55666258	55667088	merge.INS.532	1	1	1	1	1
chr1	56530347	56530989	merge.INS.533	1	1	1	1	1
chr1	56551281	56551394	merge.INS.534	1	1	1	1	1
chr1	56557002	56557127	merge.INS.535	1	1	1	1	1
chr1	57367045	57368673	merge.INS.536	1	1	1	1	1
chr1	57606180	57606408	merge.INS.537	1	1	1	1	1
chr1	57639288	57639470	merge.INS.538	0	1	1	0	1
chr1	57739436	57739524	merge.INS.539	0	0	1	1	1
chr1	57951318	57951381	merge.INS.540	1	1	1	1	1
chr1	58518193	58518446	merge.INS.541	1	1	1	1	1
chr1	58651409	58651478	merge.INS.542	1	1	1	1	1
chr1	58698089	58698159	merge.INS.543	1	1	1	1	1
chr1	58729585	58730170	merge.INS.544	1	1	1	1	1
chr1	58739618	58739954	merge.INS.545	1	1	1	1	1
chr1	59002158	59002193	merge.INS.546	1	1	1	1	1
chr1	59014681	59014712	merge.INS.547	1	1	1	1	1
chr1	59065625	59065660	merge.INS.548	1	1	1	1	1
chr1	59125795	59126132	merge.INS.549	1	1	1	1	1
chr1	59406192	59406542	merge.INS.550	1	1	1	1	1
chr1	59491037	59491122	merge.INS.551	1	1	1	1	1
chr1	59955241	59955364	merge.INS.552	1	1	1	1	1
chr1	60064272	60064331	merge.INS.553	1	1	1	1	1
chr1	60065004	60065073	merge.INS.554	1	1	1	1	1
chr1	60085662	60086071	merge.INS.555	1	1	1	0	1
chr1	60594824	60595382	merge.INS.556	1	1	1	1	1
chr1	61393246	61395164	merge.INS.557	1	1	1	1	1
chr1	61706835	61706898	merge.INS.558	1	1	1	1	1
chr1	61871391	61871599	merge.INS.559	1	1	1	1	1
chr1	61886821	61886859	merge.INS.560	1	1	1	1	1
chr1	62137380	62138014	merge.INS.561	1	1	1	1	1
chr1	62246929	62247002	merge.INS.562	1	1	1	1	0
chr1	62250134	62250175	merge.INS.563	1	1	0	1	0
chr1	62996280	62996618	merge.INS.564	1	1	1	1	1
chr1	63045886	63046130	merge.INS.565	1	1	1	1	1
chr1	63053804	63053971	merge.INS.566	1	1	1	1	1
chr1	63178101	63178141	merge.INS.567	1	1	1	1	1
chr1	63347053	63347114	merge.INS.568	1	1	1	1	0
chr1	63422240	63422298	merge.INS.569	1	1	1	1	0
chr1	63473991	63474134	merge.INS.570	1	1	1	1	1
chr1	64201366	64201881	merge.INS.571	1	1	1	1	1
chr1	64239115	64239211	merge.INS.572	1	1	1	1	1
chr1	64398231	64398318	merge.INS.573	1	1	1	1	1
chr1	64492376	64492743	merge.INS.574	1	1	1	1	1
chr1	64519696	64519756	merge.INS.575	1	1	1	1	0
chr1	65362166	65362200	merge.INS.576	1	1	1	1	1
chr1	66400523	66400611	merge.INS.577	1	1	1	1	1
chr1	66525587	66525622	merge.INS.578	1	1	1	1	1
chr1	66630906	66631062	merge.INS.579	1	1	1	1	1
chr1	66643099	66643133	merge.INS.580	1	1	1	1	1
chr1	66659953	66660323	merge.INS.581	1	1	1	1	1
chr1	67013160	67013190	merge.INS.582	1	1	1	1	1
chr1	67158851	67159654	merge.INS.583	1	1	1	1	1
chr1	67403929	67403971	merge.INS.584	1	1	1	1	1
chr1	67710066	67710170	merge.INS.585	1	1	1	1	0
chr1	67930030	67930082	merge.INS.586	1	1	1	1	1
chr1	69237489	69237546	merge.INS.587	1	1	1	1	1
chr1	69465249	69465290	merge.INS.588	1	1	1	1	1
chr1	69625375	69625720	merge.INS.589	1	1	1	1	1
chr1	69916062	69917255	merge.INS.590	1	1	1	1	1
chr1	69946663	69947009	merge.INS.591	1	1	1	1	1
chr1	70535218	70535262	merge.INS.592	1	1	1	1	1
chr1	70734695	70734750	merge.INS.593	1	1	1	1	1
chr1	71688373	71688523	merge.INS.594	1	1	1	1	1
chr1	71793266	71793529	merge.INS.595	1	1	1	1	1
chr1	71928113	71928500	merge.INS.596	1	1	1	1	1
chr1	72173324	72173651	merge.INS.597	1	1	1	1	1
chr1	72515807	72516040	merge.INS.598	1	1	1	1	1
chr1	73134336	73134372	merge.INS.599	1	1	1	1	1
chr1	73183133	73183226	merge.INS.600	1	1	1	1	1
chr1	73444723	73444773	merge.INS.601	1	1	1	1	1
chr1	73549544	73549582	merge.INS.602	1	1	1	1	1
chr1	73939950	73940065	merge.INS.603	1	1	1	1	1
chr1	73971798	73972157	merge.INS.604	1	1	1	1	1
chr1	73972391	73972429	merge.INS.605	0	1	1	1	1
chr1	74005956	74006312	merge.INS.606	1	1	1	1	1
chr1	74682362	74682693	merge.INS.607	1	1	1	1	1
chr1	74758378	74758971	merge.INS.608	1	1	1	1	1
chr1	74989509	74989553	merge.INS.609	1	1	1	1	1
chr1	75091473	75091810	merge.INS.610	1	1	1	1	1
chr1	75280130	75280998	merge.INS.611	1	1	1	1	1
chr1	75885670	75886139	merge.INS.612	1	1	1	1	1
chr1	75886349	75886423	merge.INS.613	1	1	1	1	1
chr1	75906462	75906878	merge.INS.614	1	1	1	1	1
chr1	76057354	76057392	merge.INS.615	1	1	1	1	0
chr1	76390945	76391273	merge.INS.616	1	1	1	1	1
chr1	76839732	76839894	merge.INS.617	1	1	1	1	1
chr1	77016107	77016383	merge.INS.618	1	1	1	1	1
chr1	77266980	77267018	merge.INS.619	1	1	1	1	1
chr1	77358020	77358066	merge.INS.620	1	1	1	0	0
chr1	77367571	77367611	merge.INS.621	1	1	1	1	0
chr1	77367676	77367713	merge.INS.622	1	1	1	0	0
chr1	77367793	77368038	merge.INS.623	1	1	1	1	1
chr1	77887947	77888045	merge.INS.624	1	1	1	1	1
chr1	78032534	78032616	merge.INS.625	1	1	1	1	1
chr1	78476547	78476635	merge.INS.626	1	1	1	1	1
chr1	78798490	78798534	merge.INS.627	1	1	1	1	1
chr1	78828189	78828231	merge.INS.628	1	1	0	1	0
chr1	78865512	78865847	merge.INS.629	1	1	1	1	1
chr1	79027436	79027474	merge.INS.630	1	1	1	0	1
chr1	79572421	79572512	merge.INS.631	1	1	1	0	0
chr1	79722805	79722914	merge.INS.632	1	1	1	1	1
chr1	79805422	79805617	merge.INS.633	1	1	1	1	1
chr1	79883737	79883778	merge.INS.634	1	1	1	1	1
chr1	80079573	80079779	merge.INS.635	1	1	1	1	1
chr1	80330966	80331065	merge.INS.636	1	1	1	1	0
chr1	80338719	80338761	merge.INS.637	0	1	1	1	1
chr1	80387553	80387886	merge.INS.638	1	1	1	1	1
chr1	80703235	80703321	merge.INS.639	1	1	1	1	1
chr1	80885844	80885997	merge.INS.640	1	1	1	1	1
chr1	80938939	80938975	merge.INS.641	1	1	1	0	0
chr1	81058431	81058774	merge.INS.642	1	1	1	1	1
chr1	81194666	81194865	merge.INS.643	1	1	1	1	1
chr1	81322093	81322165	merge.INS.644	1	1	1	1	1
chr1	81839898	81839949	merge.INS.645	1	1	1	1	1
chr1	81846358	81846688	merge.INS.646	0	1	1	1	1
chr1	81998919	81999091	merge.INS.647	1	1	1	1	1
chr1	82254783	82259177	merge.INS.648	1	1	1	1	1
chr1	82414982	82415211	merge.INS.649	1	1	1	1	1
chr1	82666352	82666432	merge.INS.650	1	1	1	1	1
chr1	82736650	82736772	merge.INS.651	1	1	1	0	1
chr1	83018919	83019023	merge.INS.652	1	1	1	1	1
chr1	83019118	83019165	merge.INS.653	1	1	1	1	1
chr1	83760763	83760891	merge.INS.654	1	1	1	1	1
chr1	83801758	83801819	merge.INS.655	1	1	1	1	1
chr1	83892737	83892929	merge.INS.656	1	1	1	1	1
chr1	84027473	84027632	merge.INS.657	1	1	1	1	1
chr1	84368294	84368458	merge.INS.658	1	1	1	1	1
chr1	84447582	84447919	merge.INS.659	1	1	1	1	1
chr1	84768780	84768989	merge.INS.660	1	1	1	1	1
chr1	85154362	85154963	merge.INS.661	1	1	1	1	1
chr1	85667963	85668002	merge.INS.662	1	1	1	1	0
chr1	85799208	85799253	merge.INS.663	1	1	1	1	1
chr1	85996494	85996538	merge.INS.664	1	1	1	1	1
chr1	85997057	85997110	merge.INS.665	1	1	1	1	1
chr1	86216433	86216972	merge.INS.666	1	1	1	1	1
chr1	86797349	86798115	merge.INS.667	1	1	1	1	1
chr1	86976704	86976756	merge.INS.668	1	1	1	1	1
chr1	87037198	87037340	merge.INS.669	1	1	1	1	1
chr1	87046754	87048867	merge.INS.670	1	1	1	1	1
chr1	87425253	87425296	merge.INS.671	1	1	1	1	1
chr1	87768698	87768744	merge.INS.672	1	1	1	1	0
chr1	88140836	88140868	merge.INS.673	1	1	1	1	0
chr1	88314417	88314460	merge.INS.674	1	1	1	1	1
chr1	88395027	88395142	merge.INS.675	1	1	1	1	1
chr1	88457646	88457875	merge.INS.676	1	1	1	1	1
chr1	88507128	88511009	merge.INS.677	1	1	1	1	1
chr1	89806291	89806399	merge.INS.678	1	1	1	1	1
chr1	90075884	90076138	merge.INS.679	1	1	1	1	1
chr1	90183786	90183996	merge.INS.680	1	1	1	1	1
chr1	90194729	90194888	merge.INS.681	1	1	1	1	1
chr1	90378535	90379557	merge.INS.682	1	1	1	1	1
chr1	90817980	90818055	merge.INS.683	1	1	1	1	1
chr1	90826107	90826216	merge.INS.684	1	1	1	1	1
chr1	90867280	90867335	merge.INS.685	1	1	1	1	1
chr1	90891764	90891873	merge.INS.686	1	1	1	1	1
chr1	90950294	90950400	merge.INS.687	1	1	0	1	1
chr1	91168518	91168873	merge.INS.688	1	1	1	1	1
chr1	91223448	91223977	merge.INS.689	1	1	1	0	0
chr1	91277627	91277676	merge.INS.690	1	1	1	1	1
chr1	91277685	91277750	merge.INS.691	1	1	1	1	1
chr1	91277864	91277942	merge.INS.692	1	1	1	1	1
chr1	91459283	91459450	merge.INS.693	1	1	1	1	1
chr1	91631668	91631723	merge.INS.694	1	1	1	1	1
chr1	91925694	91925848	merge.INS.695	1	1	1	1	1
chr1	91927331	91927443	merge.INS.696	1	1	1	1	1
chr1	92213445	92213570	merge.INS.697	1	1	1	1	1
chr1	92701961	92702298	merge.INS.698	1	1	1	1	1
chr1	92846849	92847005	merge.INS.699	1	1	1	1	1
chr1	92948644	92948785	merge.INS.700	1	1	1	1	1
chr1	93032657	93033022	merge.INS.701	1	1	1	1	1
chr1	93282464	93282545	merge.INS.702	1	1	1	1	1
chr1	93344830	93344980	merge.INS.703	1	1	1	1	1
chr1	93876121	93878658	merge.INS.704	1	1	1	1	1
chr1	94600398	94600454	merge.INS.705	1	1	1	1	1
chr1	94689697	94689791	merge.INS.706	1	1	1	1	1
chr1	94957473	94958000	merge.INS.707	1	1	1	1	1
chr1	95045901	95046035	merge.INS.708	1	1	1	1	1
chr1	95806222	95806262	merge.INS.709	1	1	1	0	1
chr1	96153051	96153241	merge.INS.710	1	1	1	1	1
chr1	96248359	96248405	merge.INS.711	1	1	1	1	0
chr1	96265652	96265997	merge.INS.712	1	1	1	1	1
chr1	97173251	97173329	merge.INS.713	1	1	1	1	1
chr1	98046179	98046268	merge.INS.714	1	1	1	1	1
chr1	98503571	98503783	merge.INS.715	1	1	1	0	1
chr1	98512461	98512606	merge.INS.716	1	1	1	1	1
chr1	98512617	98512708	merge.INS.717	1	1	1	1	0
chr1	98512976	98513098	merge.INS.718	1	1	1	1	1
chr1	98928548	98928586	merge.INS.719	1	1	1	1	0
chr1	99111997	99112297	merge.INS.720	1	1	1	1	1
chr1	99499567	99499668	merge.INS.721	1	1	1	1	1
chr1	99823651	99823745	merge.INS.722	1	1	1	1	1
chr1	99826982	99827056	merge.INS.723	1	1	1	1	1
chr1	99857789	99857873	merge.INS.724	1	1	1	0	1
chr1	100528655	100528991	merge.INS.725	1	1	1	1	1
chr1	100819183	100819738	merge.INS.726	1	1	1	1	1
chr1	100915123	100915216	merge.INS.727	1	1	1	1	1
chr1	100964261	100964323	merge.INS.728	1	1	1	1	1
chr1	101182953	101183011	merge.INS.729	1	1	1	1	0
chr1	101253218	101253382	merge.INS.730	1	1	1	1	1
chr1	101253557	101254328	merge.INS.731	1	1	1	1	1
chr1	101350800	101350889	merge.INS.732	1	1	1	1	1
chr1	101553006	101553341	merge.INS.733	1	1	1	1	1
chr1	101744359	101744703	merge.INS.734	1	1	1	1	1
chr1	102045502	102045592	merge.INS.735	1	1	1	1	1
chr1	102047086	102047156	merge.INS.736	1	1	1	1	1
chr1	102093560	102093798	merge.INS.737	1	1	1	1	1
chr1	102454967	102455303	merge.INS.738	1	1	1	1	1
chr1	102523088	102523208	merge.INS.739	1	1	1	1	1
chr1	102583480	102583536	merge.INS.740	0	1	1	0	0
chr1	102588931	102589246	merge.INS.741	1	1	1	1	1
chr1	102774256	102774340	merge.INS.742	1	1	1	1	1
chr1	103173111	103173317	merge.INS.743	1	1	1	1	1
chr1	103182594	103182682	merge.INS.744	1	1	1	1	1
chr1	103196042	103196078	merge.INS.745	0	1	1	1	0
chr1	103272219	103272334	merge.INS.746	1	1	1	1	1
chr1	103345478	103345587	merge.INS.747	1	1	1	1	1
chr1	103619896	103619933	merge.INS.748	1	1	1	1	1
chr1	104031848	104032171	merge.INS.749	1	1	1	0	1
chr1	104055433	104055463	merge.INS.750	1	1	1	1	0
chr1	104562260	104562469	merge.INS.751	1	1	1	1	1
chr1	104619752	104619806	merge.INS.752	1	1	1	1	1
chr1	104688483	104688626	merge.INS.753	1	1	1	1	1
chr1	104966296	104966369	merge.INS.754	1	1	1	1	1
chr1	104966445	104966513	merge.INS.755	1	1	1	1	1
chr1	104976482	104976523	merge.INS.756	1	1	1	1	1
chr1	105020049	105020119	merge.INS.757	1	1	1	1	1
chr1	105075267	105075559	merge.INS.758	1	1	1	1	1
chr1	105225622	105225675	merge.INS.759	0	1	1	1	1
chr1	105537091	105537139	merge.INS.760	1	1	1	1	1
chr1	105571335	105573596	merge.INS.761	1	1	1	1	1
chr1	105788299	105788497	merge.INS.762	1	1	1	1	1
chr1	105943243	105943470	merge.INS.763	0	1	1	1	1
chr1	105961389	105961969	merge.INS.764	1	1	1	1	1
chr1	105963304	105964081	merge.INS.765	1	1	1	1	1
chr1	106431100	106431489	merge.INS.766	1	1	1	1	1
chr1	106683559	106683673	merge.INS.767	1	1	1	1	1
chr1	107112127	107112252	merge.INS.768	1	1	1	1	1
chr1	107181552	107181588	merge.INS.769	1	1	1	1	1
chr1	107555330	107555400	merge.INS.770	1	1	1	1	1
chr1	107599846	107600172	merge.INS.771	1	1	1	1	1
chr1	107753513	107753559	merge.INS.772	1	1	1	1	1
chr1	108023196	108023564	merge.INS.773	1	1	1	1	1
chr1	108023703	108023748	merge.INS.774	1	1	1	1	0
chr1	108024914	108025193	merge.INS.775	1	1	1	1	1
chr1	108187929	108187985	merge.INS.776	1	1	1	1	1
chr1	108374873	108374969	merge.INS.777	1	1	1	1	1
chr1	108579770	108579852	merge.INS.778	1	1	1	0	1
chr1	108666579	108666629	merge.INS.779	1	1	1	1	1
chr1	108675867	108676301	merge.INS.780	1	1	1	1	1
chr1	108689605	108689694	merge.INS.781	1	1	1	1	1
chr1	108747109	108747181	merge.INS.782	1	1	1	1	1
chr1	108771392	108771730	merge.INS.783	1	1	1	1	0
chr1	108771784	108772240	merge.INS.784	1	1	1	1	1
chr1	108772274	108772513	merge.INS.785	1	1	1	1	0
chr1	108908722	108908783	merge.INS.786	1	1	1	1	1
chr1	108917613	108917647	merge.INS.787	0	1	1	1	0
chr1	109219264	109219322	merge.INS.788	1	1	0	0	0
chr1	109670105	109670157	merge.INS.789	1	1	1	1	1
chr1	109725065	109725250	merge.INS.790	1	1	1	1	1
chr1	110060659	110060700	merge.INS.791	1	1	1	1	1
chr1	110120463	110125236	merge.INS.792	1	1	1	1	1
chr1	110310150	110310240	merge.INS.793	1	1	1	1	1
chr1	110380060	110380103	merge.INS.794	1	1	1	1	1
chr1	110387803	110387881	merge.INS.795	1	1	1	1	1
chr1	110769232	110769279	merge.INS.796	1	1	1	1	1
chr1	111259970	111260947	merge.INS.797	1	1	1	1	1
chr1	111353553	111355476	merge.INS.798	1	1	1	1	1
chr1	111544735	111545280	merge.INS.799	1	1	1	1	1
chr1	111581053	111581393	merge.INS.800	1	1	1	1	1
chr1	112387841	112387908	merge.INS.801	1	1	0	1	0
chr1	112449373	112449702	merge.INS.802	1	1	1	1	1
chr1	112774122	112774634	merge.INS.803	1	1	1	1	1
chr1	112898485	112898770	merge.INS.804	1	1	1	1	1
chr1	112999485	113001503	merge.INS.805	1	1	1	1	1
chr1	113070237	113070380	merge.INS.806	1	1	1	1	1
chr1	113415984	113416184	merge.INS.807	1	1	1	1	1
chr1	113416219	113416393	merge.INS.808	1	1	1	1	0
chr1	113416421	113416670	merge.INS.809	1	1	1	1	1
chr1	114111730	114111798	merge.INS.810	1	1	1	1	1
chr1	114149212	114149284	merge.INS.811	1	1	1	1	1
chr1	114205244	114205627	merge.INS.812	1	1	1	1	1
chr1	114479794	114479921	merge.INS.813	1	1	1	1	1
chr1	114658769	114659089	merge.INS.814	1	1	1	1	1
chr1	115147525	115147633	merge.INS.815	1	1	1	1	1
chr1	115761406	115761703	merge.INS.816	0	1	1	1	1
chr1	115940967	115940998	merge.INS.817	1	1	1	1	1
chr1	116152675	116152772	merge.INS.818	1	1	1	1	1
chr1	116305898	116306006	merge.INS.819	1	1	1	1	1
chr1	116436915	116439303	merge.INS.820	1	1	1	1	1
chr1	117137448	117137512	merge.INS.821	1	1	0	1	1
chr1	117386727	117386800	merge.INS.822	1	1	1	1	1
chr1	117429490	117430438	merge.INS.823	1	1	1	1	1
chr1	118318800	118319812	merge.INS.824	1	1	1	1	1
chr1	118387357	118387525	merge.INS.825	1	1	1	1	1
chr1	118389108	118391787	merge.INS.826	1	1	1	1	1
chr1	119236093	119236230	merge.INS.827	1	1	1	1	1
chr1	119389138	119389263	merge.INS.828	1	1	1	1	1
chr1	119569945	119569993	merge.INS.829	1	1	1	1	1
chr1	120402190	120402222	merge.INS.830	1	1	1	1	1
chr1	120459003	120459344	merge.INS.831	1	1	1	1	1
chr1	120834554	120835068	merge.INS.832	1	1	1	1	0
chr1	121395934	121396100	merge.INS.833	1	1	1	1	0
chr1	121396713	121396942	merge.INS.834	0	1	1	0	0
chr1	121401148	121401308	merge.INS.835	1	1	1	1	1
chr1	121401325	121401574	merge.INS.836	1	1	1	1	1
chr1	121616969	121617437	merge.INS.837	1	1	1	1	1
chr1	121623357	121624163	merge.INS.838	1	1	1	1	1
chr1	121743452	121743794	merge.INS.839	0	1	0	0	0
chr1	121766789	121767603	merge.INS.840	1	1	1	1	0
chr1	121838631	121838934	merge.INS.841	0	1	1	1	0
chr1	121846948	121847417	merge.INS.842	0	1	0	1	0
chr1	122427786	122428273	merge.INS.843	1	1	1	0	0
chr1	125013062	125013457	merge.INS.844	1	1	1	1	1
chr1	125026048	125026219	merge.INS.845	1	1	1	1	1
chr1	125080585	125081365	merge.INS.846	0	1	1	0	0
chr1	125081621	125082272	merge.INS.847	1	1	1	1	1
chr1	125086532	125087326	merge.INS.848	1	1	1	1	1
chr1	125087527	125088293	merge.INS.849	1	1	1	0	0
chr1	125103204	125103302	merge.INS.850	1	1	1	1	1
chr1	125147734	125150303	merge.INS.851	1	1	1	1	1
chr1	125154509	125154645	merge.INS.852	1	1	1	1	1
chr1	125155562	125155616	merge.INS.853	1	1	1	1	1
chr1	125162899	125163047	merge.INS.854	1	1	1	1	0
chr1	125167472	125167623	merge.INS.855	0	1	1	0	0
chr1	125167669	125168424	merge.INS.856	1	1	1	1	1
chr1	125169454	125169669	merge.INS.857	1	1	1	1	1
chr1	125170563	125170937	merge.INS.858	0	1	1	1	1
chr1	125177520	125177871	merge.INS.859	1	1	1	1	1
chr1	125178855	125178978	merge.INS.860	0	1	1	1	0
chr1	125179508	125180707	merge.INS.861	1	1	1	1	1
chr1	125181950	125182113	merge.INS.862	1	1	1	1	1
chr1	125182607	125182739	merge.INS.863	1	1	1	1	1
chr1	125184239	125184358	merge.INS.864	1	1	1	0	1
chr1	143202276	143202479	merge.INS.865	1	1	1	1	1
chr1	143207944	143207996	merge.INS.866	0	1	1	0	1
chr1	143211370	143223595	merge.INS.867	1	1	1	1	1
chr1	143223691	143223878	merge.INS.868	1	1	1	0	1
chr1	143224764	143225003	merge.INS.869	1	1	1	1	1
chr1	143229440	143229532	merge.INS.870	1	1	1	1	1
chr1	143230324	143230382	merge.INS.871	0	1	1	1	1
chr1	143233699	143233801	merge.INS.872	1	1	1	1	1
chr1	143237085	143237130	merge.INS.873	1	1	1	0	1
chr1	143237915	143238212	merge.INS.874	1	1	1	0	0
chr1	143239520	143239702	merge.INS.875	0	1	1	1	0
chr1	143239778	143239913	merge.INS.876	1	1	1	1	0
chr1	143240150	143240604	merge.INS.877	1	1	0	1	1
chr1	143240797	143241353	merge.INS.878	0	1	1	0	0
chr1	143264742	143265185	merge.INS.879	1	1	0	1	1
chr1	143266472	143266572	merge.INS.880	0	1	1	1	1
chr1	143267811	143267937	merge.INS.881	1	1	1	1	1
chr1	143269147	143269649	merge.INS.882	1	1	1	1	1
chr1	143274108	143274258	merge.INS.883	1	1	1	1	1
chr1	143274593	143276984	merge.INS.884	1	1	1	0	1
chr1	143277768	143277834	merge.INS.885	1	1	1	1	1
chr1	143497105	143497174	merge.INS.886	1	1	0	1	0
chr1	143497251	143498071	merge.INS.887	1	1	1	1	1
chr1	143502134	143502222	merge.INS.888	1	1	1	1	0
chr1	143504328	143504450	merge.INS.889	1	1	1	1	1
chr1	143534393	143534472	merge.INS.890	1	1	1	1	1
chr1	143564760	143564818	merge.INS.891	1	1	1	1	1
chr1	144101293	144106825	merge.INS.892	1	1	1	1	1
chr1	144137841	144138151	merge.INS.893	1	1	1	1	1
chr1	144138950	144139884	merge.INS.894	1	1	1	1	1
chr1	144140045	144141030	merge.INS.895	1	1	1	1	1
chr1	144541945	144542033	merge.INS.896	1	1	1	1	1
chr1	144542038	144542078	merge.INS.897	1	1	1	1	0
chr1	144642697	144642813	merge.INS.898	1	1	1	1	0
chr1	144643166	144643256	merge.INS.899	1	1	1	1	0
chr1	144813252	144813921	merge.INS.900	1	1	1	1	0
chr1	144825922	144826528	merge.INS.901	1	1	1	1	1
chr1	144827808	144828324	merge.INS.902	1	1	1	1	1
chr1	144883185	144883255	merge.INS.903	1	1	1	1	1
chr1	144883329	144883470	merge.INS.904	1	1	1	1	1
chr1	145403887	145403946	merge.INS.905	1	1	1	1	0
chr1	145411772	145413335	merge.INS.906	1	1	1	1	1
chr1	145576022	145576088	merge.INS.907	1	1	1	1	1
chr1	145766798	145766841	merge.INS.908	1	1	1	1	1
chr1	146381596	146381638	merge.INS.909	1	1	1	1	1
chr1	146813555	146813589	merge.INS.910	0	1	0	1	0
chr1	147233315	147233553	merge.INS.911	1	1	1	1	1
chr1	147652891	147653507	merge.INS.912	1	1	1	1	1
chr1	147920497	147920687	merge.INS.913	1	1	1	1	1
chr1	147949438	147949659	merge.INS.914	1	1	1	1	1
chr1	148142024	148142103	merge.INS.915	1	1	1	1	1
chr1	148265639	148265720	merge.INS.916	1	1	1	1	1
chr1	148328357	148328402	merge.INS.917	1	1	1	1	1
chr1	149023500	149024119	merge.INS.918	1	1	1	1	1
chr1	149087161	149087516	merge.INS.919	1	0	1	1	0
chr1	149920030	149920502	merge.INS.920	1	1	1	1	1
chr1	150743563	150743634	merge.INS.921	0	1	1	0	0
chr1	150744137	150744373	merge.INS.922	1	1	1	0	1
chr1	150744399	150744781	merge.INS.923	1	1	1	0	1
chr1	151160237	151160279	merge.INS.924	1	0	1	1	0
chr1	151367355	151367390	merge.INS.925	1	1	1	1	0
chr1	151769251	151769458	merge.INS.926	1	1	1	1	1
chr1	151867583	151867674	merge.INS.927	1	1	1	1	1
chr1	152027054	152027117	merge.INS.928	1	1	1	1	1
chr1	152082758	152082823	merge.INS.929	1	1	1	1	1
chr1	152214225	152216939	merge.INS.930	1	1	1	1	1
chr1	152216978	152218359	merge.INS.931	1	1	1	1	1
chr1	152218979	152220398	merge.INS.932	1	1	1	1	1
chr1	152234086	152234161	merge.INS.933	1	1	1	1	1
chr1	152305575	152308033	merge.INS.934	1	1	1	1	1
chr1	152880980	152881080	merge.INS.935	1	1	1	1	1
chr1	153017248	153017413	merge.INS.936	1	1	1	1	1
chr1	153088294	153088371	merge.INS.937	1	1	1	1	1
chr1	153243328	153244608	merge.INS.938	1	1	1	1	1
chr1	153256653	153257835	merge.INS.939	1	1	1	1	1
chr1	153489788	153489963	merge.INS.940	1	1	1	1	1
chr1	154423262	154423297	merge.INS.941	0	0	1	1	0
chr1	154713955	154716188	merge.INS.942	1	1	1	1	1
chr1	154755820	154756556	merge.INS.943	1	1	1	1	1
chr1	154766418	154766454	merge.INS.944	1	1	1	1	0
chr1	155147339	155147586	merge.INS.945	1	1	1	1	1
chr1	155188677	155190179	merge.INS.946	1	1	1	1	1
chr1	155190181	155191590	merge.INS.947	1	1	1	1	0
chr1	155700745	155701416	merge.INS.948	1	1	1	1	1
chr1	155954466	155954932	merge.INS.949	1	1	1	1	1
chr1	155991248	155991380	merge.INS.950	1	1	1	1	1
chr1	156004603	156004926	merge.INS.951	1	1	1	1	1
chr1	156140161	156140202	merge.INS.952	1	1	1	0	0
chr1	156327922	156328196	merge.INS.953	1	1	1	1	1
chr1	156735536	156736004	merge.INS.954	1	1	1	1	1
chr1	156817049	156817126	merge.INS.955	1	1	1	1	0
chr1	156928365	156928416	merge.INS.956	1	1	1	1	0
chr1	156930046	156930105	merge.INS.957	1	1	1	1	0
chr1	157082281	157082313	merge.INS.958	1	1	1	1	1
chr1	157265942	157266094	merge.INS.959	1	1	1	1	1
chr1	157300438	157300606	merge.INS.960	1	1	1	1	1
chr1	157494822	157494888	merge.INS.961	1	1	1	1	0
chr1	157760682	157760944	merge.INS.962	1	1	1	1	1
chr1	158473769	158474198	merge.INS.963	1	1	1	1	1
chr1	159449961	159450090	merge.INS.964	1	1	1	1	1
chr1	159873840	159873904	merge.INS.965	1	1	1	1	1
chr1	160048229	160048263	merge.INS.966	1	1	1	1	0
chr1	160339107	160339263	merge.INS.967	1	1	1	1	1
chr1	161035890	161036333	merge.INS.968	1	1	1	1	1
chr1	161061314	161061566	merge.INS.969	1	1	1	1	1
chr1	161459303	161459382	merge.INS.970	0	1	1	1	0
chr1	162451545	162451624	merge.INS.971	1	1	1	1	1
chr1	162727101	162727709	merge.INS.972	1	1	1	1	1
chr1	162791519	162791857	merge.INS.973	1	1	1	1	1
chr1	162868633	162868836	merge.INS.974	1	1	1	1	1
chr1	163059331	163059423	merge.INS.975	1	1	1	1	1
chr1	163344642	163344977	merge.INS.976	1	1	1	1	1
chr1	163552089	163552228	merge.INS.977	1	1	1	1	1
chr1	163552232	163552425	merge.INS.978	1	1	1	1	1
chr1	163715195	163715722	merge.INS.979	1	1	1	1	1
chr1	164063602	164063749	merge.INS.980	1	1	1	1	1
chr1	164235480	164235601	merge.INS.981	1	1	1	1	1
chr1	164271983	164272019	merge.INS.982	1	1	1	1	1
chr1	164338345	164338417	merge.INS.983	1	1	1	1	0
chr1	164776941	164777011	merge.INS.984	1	1	1	1	0
chr1	164875988	164876051	merge.INS.985	1	1	1	1	1
chr1	164881591	164881663	merge.INS.986	1	1	1	1	1
chr1	164941682	164941746	merge.INS.987	1	1	1	1	1
chr1	165480331	165480429	merge.INS.988	1	1	1	1	1
chr1	165529924	165529999	merge.INS.989	1	1	1	1	1
chr1	165536641	165536706	merge.INS.990	1	1	1	1	1
chr1	165582597	165582778	merge.INS.991	0	1	1	1	0
chr1	165583194	165583369	merge.INS.992	1	1	1	1	1
chr1	165634736	165634903	merge.INS.993	1	1	1	1	1
chr1	165690063	165690348	merge.INS.994	1	1	1	1	1
chr1	165708137	165708321	merge.INS.995	1	1	1	1	1
chr1	165820321	165820450	merge.INS.996	1	1	1	1	1
chr1	166220197	166220535	merge.INS.997	1	1	1	1	1
chr1	166651802	166651862	merge.INS.998	0	1	1	1	1
chr1	166677370	166677553	merge.INS.999	1	1	1	1	1
chr1	166728739	166728798	merge.INS.1000	1	1	1	1	0
chr1	166739865	166740183	merge.INS.1001	1	1	1	1	1
chr1	167056409	167057939	merge.INS.1002	1	1	1	1	1
chr1	167205990	167210345	merge.INS.1003	1	1	1	1	1
chr1	167434896	167435484	merge.INS.1004	1	1	1	1	1
chr1	168395454	168396341	merge.INS.1005	1	1	1	1	1
chr1	168471945	168473679	merge.INS.1006	1	1	1	1	1
chr1	169075435	169075467	merge.INS.1007	1	1	1	1	0
chr1	169089692	169090108	merge.INS.1008	1	1	1	1	1
chr1	169342568	169342904	merge.INS.1009	1	1	1	1	1
chr1	169355256	169355385	merge.INS.1010	1	1	1	1	1
chr1	169391844	169391948	merge.INS.1011	1	1	1	1	1
chr1	169554161	169554279	merge.INS.1012	1	1	1	1	1
chr1	169993603	169993990	merge.INS.1013	1	1	1	1	1
chr1	170413817	170413865	merge.INS.1014	1	1	1	1	1
chr1	170514387	170514471	merge.INS.1015	1	1	1	1	1
chr1	170634295	170634610	merge.INS.1016	1	1	1	1	1
chr1	170917490	170917586	merge.INS.1017	1	1	1	1	1
chr1	170933499	170933573	merge.INS.1018	1	1	1	1	0
chr1	171095921	171096064	merge.INS.1019	1	1	1	1	1
chr1	171389160	171389525	merge.INS.1020	1	1	1	1	1
chr1	171518464	171518530	merge.INS.1021	1	1	1	1	0
chr1	171569577	171569613	merge.INS.1022	1	1	1	1	1
chr1	171682572	171682684	merge.INS.1023	1	1	1	1	1
chr1	171756488	171756552	merge.INS.1024	1	1	1	1	1
chr1	171816529	171816680	merge.INS.1025	1	1	1	1	1
chr1	171832467	171832603	merge.INS.1026	1	1	1	1	1
chr1	171936870	171936932	merge.INS.1027	1	1	1	1	1
chr1	171970699	171970736	merge.INS.1028	1	1	1	1	1
chr1	171983396	171983542	merge.INS.1029	1	1	1	1	1
chr1	172571897	172572432	merge.INS.1030	1	1	1	1	1
chr1	172694061	172694381	merge.INS.1031	1	1	1	1	1
chr1	172694389	172694612	merge.INS.1032	1	1	1	1	1
chr1	173377166	173377251	merge.INS.1033	0	1	0	1	1
chr1	173377814	173377847	merge.INS.1034	0	1	0	1	0
chr1	173381933	173382004	merge.INS.1035	1	1	1	1	0
chr1	173622658	173622977	merge.INS.1036	0	0	1	1	0
chr1	173917606	173917705	merge.INS.1037	1	1	1	1	1
chr1	174136117	174136493	merge.INS.1038	1	1	1	1	1
chr1	174349828	174350559	merge.INS.1039	0	1	1	1	0
chr1	174363864	174364200	merge.INS.1040	1	1	1	1	1
chr1	174550985	174551031	merge.INS.1041	1	0	1	1	0
chr1	174833450	174833517	merge.INS.1042	1	1	1	1	1
chr1	174937621	174937665	merge.INS.1043	1	1	1	0	0
chr1	174937738	174938868	merge.INS.1044	1	1	1	1	1
chr1	175059702	175059993	merge.INS.1045	1	1	1	1	1
chr1	175231434	175231636	merge.INS.1046	1	1	1	1	0
chr1	175231796	175232088	merge.INS.1047	1	1	1	1	0
chr1	175240452	175240721	merge.INS.1048	1	1	1	1	1
chr1	175431911	175431984	merge.INS.1049	1	1	1	1	1
chr1	175650700	175652079	merge.INS.1050	1	1	1	1	1
chr1	175657883	175657925	merge.INS.1051	1	1	1	1	1
chr1	175842859	175843384	merge.INS.1052	1	1	1	1	1
chr1	176396685	176396872	merge.INS.1053	1	1	1	1	1
chr1	177149363	177149437	merge.INS.1054	0	1	1	1	0
chr1	177149487	177149570	merge.INS.1055	1	1	1	1	1
chr1	177399122	177399287	merge.INS.1056	1	1	1	0	0
chr1	177399304	177399557	merge.INS.1057	1	1	1	1	1
chr1	177419231	177419657	merge.INS.1058	1	1	1	1	1
chr1	177548690	177548740	merge.INS.1059	1	1	1	1	1
chr1	177843089	177843146	merge.INS.1060	1	1	1	1	1
chr1	177947714	177947818	merge.INS.1061	1	1	1	1	0
chr1	178618836	178618902	merge.INS.1062	1	1	1	1	1
chr1	178695883	178695942	merge.INS.1063	1	1	1	1	0
chr1	178696147	178696409	merge.INS.1064	1	1	1	1	0
chr1	179352568	179352654	merge.INS.1065	1	1	1	1	1
chr1	179353212	179353284	merge.INS.1066	1	1	1	1	1
chr1	179681954	179682723	merge.INS.1067	1	1	1	1	1
chr1	179795960	179796002	merge.INS.1068	1	1	1	1	1
chr1	180656445	180656693	merge.INS.1069	1	1	1	1	1
chr1	180859065	180859125	merge.INS.1070	1	1	1	1	1
chr1	180888415	180888752	merge.INS.1071	1	1	1	1	1
chr1	181023030	181023255	merge.INS.1072	1	1	1	1	1
chr1	181078276	181078610	merge.INS.1073	1	1	1	1	1
chr1	181124483	181124682	merge.INS.1074	1	1	1	1	1
chr1	181136635	181137138	merge.INS.1075	1	1	1	1	1
chr1	181426690	181426946	merge.INS.1076	1	1	1	1	1
chr1	181619211	181619548	merge.INS.1077	1	1	1	1	1
chr1	181632140	181632454	merge.INS.1078	1	1	1	1	1
chr1	182010195	182010315	merge.INS.1079	1	1	1	1	1
chr1	182068993	182069340	merge.INS.1080	1	1	1	1	1
chr1	182138463	182139476	merge.INS.1081	1	1	1	1	1
chr1	182270066	182270111	merge.INS.1082	1	1	1	1	1
chr1	182281359	182281415	merge.INS.1083	1	1	1	1	1
chr1	182451353	182451589	merge.INS.1084	1	1	1	1	1
chr1	182594285	182594389	merge.INS.1085	1	1	1	1	0
chr1	183077778	183077820	merge.INS.1086	1	1	1	1	1
chr1	183149392	183149706	merge.INS.1087	1	1	1	1	1
chr1	183149832	183150263	merge.INS.1088	1	1	1	1	1
chr1	183477421	183477774	merge.INS.1089	1	1	1	1	1
chr1	183887202	183887321	merge.INS.1090	1	1	1	1	1
chr1	184327880	184327983	merge.INS.1091	1	1	1	1	1
chr1	184354402	184354436	merge.INS.1092	1	1	1	1	1
chr1	184354456	184354500	merge.INS.1093	1	1	0	1	1
chr1	184559601	184559677	merge.INS.1094	1	1	1	1	1
chr1	185535571	185535927	merge.INS.1095	1	1	1	1	1
chr1	186005104	186005226	merge.INS.1096	1	1	1	1	1
chr1	186276814	186276940	merge.INS.1097	1	0	1	1	1
chr1	186327195	186327371	merge.INS.1098	1	1	1	1	1
chr1	186774065	186774128	merge.INS.1099	1	1	1	1	1
chr1	186857058	186857242	merge.INS.1100	1	1	1	1	1
chr1	186878073	186878492	merge.INS.1101	1	1	1	1	1
chr1	187615760	187615849	merge.INS.1102	1	1	1	1	1
chr1	187657294	187657341	merge.INS.1103	1	1	1	1	1
chr1	187666392	187666808	merge.INS.1104	1	1	1	1	1
chr1	187695914	187695979	merge.INS.1105	1	1	1	1	1
chr1	187827171	187827209	merge.INS.1106	1	1	1	1	1
chr1	188238852	188239094	merge.INS.1107	1	1	1	1	1
chr1	188283204	188283245	merge.INS.1108	1	1	1	1	1
chr1	188420584	188420687	merge.INS.1109	1	1	1	1	1
chr1	188469071	188469385	merge.INS.1110	1	1	1	1	1
chr1	188863710	188864044	merge.INS.1111	1	1	1	1	1
chr1	189231892	189231948	merge.INS.1112	1	1	1	1	1
chr1	189277898	189278219	merge.INS.1113	1	1	1	1	1
chr1	189306558	189306602	merge.INS.1114	1	1	1	1	1
chr1	189562171	189562278	merge.INS.1115	0	1	1	1	1
chr1	189562702	189562777	merge.INS.1116	0	1	1	1	0
chr1	189818540	189818587	merge.INS.1117	0	1	1	1	0
chr1	190033724	190033845	merge.INS.1118	1	1	1	1	1
chr1	190059984	190060015	merge.INS.1119	1	1	1	1	0
chr1	190482458	190482538	merge.INS.1120	1	1	1	0	1
chr1	190827522	190827614	merge.INS.1121	1	1	1	1	1
chr1	191089338	191089395	merge.INS.1122	0	1	1	1	1
chr1	191119511	191119842	merge.INS.1123	1	1	1	1	1
chr1	191234629	191235097	merge.INS.1124	1	1	1	1	1
chr1	191260853	191260888	merge.INS.1125	0	1	1	0	0
chr1	191476589	191476678	merge.INS.1126	1	1	1	1	1
chr1	191611640	191611974	merge.INS.1127	1	1	1	0	1
chr1	191649017	191649104	merge.INS.1128	1	1	1	1	1
chr1	191869889	191869943	merge.INS.1129	1	1	1	1	1
chr1	192222970	192223499	merge.INS.1130	1	1	1	1	1
chr1	192293124	192293738	merge.INS.1131	1	1	1	1	1
chr1	192518123	192518189	merge.INS.1132	1	1	1	1	1
chr1	192556577	192556768	merge.INS.1133	1	1	1	1	1
chr1	192857627	192857911	merge.INS.1134	1	1	1	1	1
chr1	193117834	193117910	merge.INS.1135	1	1	1	0	0
chr1	193162111	193162146	merge.INS.1136	1	1	1	1	0
chr1	193202253	193202346	merge.INS.1137	1	1	1	1	1
chr1	193234267	193234320	merge.INS.1138	1	1	1	1	1
chr1	193387223	193387265	merge.INS.1139	1	1	1	1	1
chr1	193588130	193588190	merge.INS.1140	1	1	1	1	1
chr1	193705996	193706325	merge.INS.1141	1	1	1	1	1
chr1	193728759	193728807	merge.INS.1142	1	1	1	1	1
chr1	194028436	194028510	merge.INS.1143	1	1	1	1	1
chr1	194098981	194099204	merge.INS.1144	1	1	1	1	1
chr1	194104638	194104705	merge.INS.1145	1	1	1	1	1
chr1	194212701	194212755	merge.INS.1146	1	1	1	0	0
chr1	194280324	194280376	merge.INS.1147	1	1	1	1	1
chr1	194303576	194304252	merge.INS.1148	1	1	1	1	1
chr1	194476148	194476286	merge.INS.1149	1	1	1	1	1
chr1	194481327	194481395	merge.INS.1150	0	1	0	0	1
chr1	194481726	194482312	merge.INS.1151	1	1	1	1	1
chr1	194486719	194486767	merge.INS.1152	1	1	1	1	1
chr1	194669538	194669839	merge.INS.1153	1	1	1	1	1
chr1	195143058	195143239	merge.INS.1154	1	1	1	1	1
chr1	195383360	195383473	merge.INS.1155	1	1	1	1	1
chr1	195571555	195571867	merge.INS.1156	1	1	1	1	1
chr1	195911115	195911295	merge.INS.1157	1	1	1	1	1
chr1	196184402	196184743	merge.INS.1158	1	1	1	1	1
chr1	196284250	196284286	merge.INS.1159	1	1	1	0	0
chr1	196437048	196437466	merge.INS.1160	1	1	1	1	1
chr1	196885493	196885526	merge.INS.1161	0	1	1	1	0
chr1	197042730	197043027	merge.INS.1162	1	1	1	1	1
chr1	197164689	197164923	merge.INS.1163	1	1	1	1	1
chr1	197544926	197545074	merge.INS.1164	1	1	1	1	1
chr1	197713907	197714161	merge.INS.1165	1	1	1	1	1
chr1	197785707	197785753	merge.INS.1166	1	1	1	1	1
chr1	197993601	197993807	merge.INS.1167	1	1	1	1	1
chr1	198397479	198397966	merge.INS.1168	1	1	1	1	1
chr1	198508228	198508401	merge.INS.1169	1	1	1	1	1
chr1	198516998	198517168	merge.INS.1170	1	1	1	1	1
chr1	198841821	198841965	merge.INS.1171	1	1	1	1	1
chr1	198956609	198956682	merge.INS.1172	1	1	1	1	1
chr1	199099753	199099815	merge.INS.1173	1	1	1	1	0
chr1	199904425	199904584	merge.INS.1174	1	1	1	1	1
chr1	199905319	199905468	merge.INS.1175	1	1	1	1	1
chr1	199914512	199914634	merge.INS.1176	1	1	1	1	1
chr1	200074737	200074783	merge.INS.1177	1	1	1	1	0
chr1	200816812	200817187	merge.INS.1178	1	1	0	1	1
chr1	200917849	200917913	merge.INS.1179	1	1	1	1	1
chr1	201111923	201112050	merge.INS.1180	1	1	1	1	0
chr1	201209584	201210010	merge.INS.1181	1	1	1	1	1
chr1	201210738	201211544	merge.INS.1182	1	1	1	1	1
chr1	201257821	201258499	merge.INS.1183	1	1	1	1	1
chr1	201316111	201316241	merge.INS.1184	1	1	1	1	1
chr1	201642527	201642589	merge.INS.1185	0	1	1	1	0
chr1	201662930	201662967	merge.INS.1186	1	1	1	1	1
chr1	201948341	201948422	merge.INS.1187	1	1	1	1	1
chr1	202028352	202028410	merge.INS.1188	1	1	1	1	1
chr1	202172457	202172751	merge.INS.1189	1	1	1	1	1
chr1	202172757	202172957	merge.INS.1190	0	1	1	1	0
chr1	202187008	202187075	merge.INS.1191	1	1	1	1	0
chr1	202204243	202207631	merge.INS.1192	1	1	1	1	1
chr1	202624459	202624616	merge.INS.1193	1	1	1	1	0
chr1	202624662	202625019	merge.INS.1194	1	1	1	1	0
chr1	202625036	202625562	merge.INS.1195	1	1	1	1	0
chr1	202691718	202691858	merge.INS.1196	1	1	1	1	0
chr1	202789583	202790072	merge.INS.1197	1	1	1	1	1
chr1	203266719	203266859	merge.INS.1198	1	1	1	1	1
chr1	203318537	203318690	merge.INS.1199	1	1	1	1	1
chr1	203499939	203500423	merge.INS.1200	1	1	1	1	1
chr1	203890300	203890336	merge.INS.1201	0	1	1	1	0
chr1	203919103	203919463	merge.INS.1202	1	1	1	1	1
chr1	204010623	204010796	merge.INS.1203	1	1	1	1	1
chr1	204195149	204195695	merge.INS.1204	1	1	1	1	1
chr1	204269326	204269674	merge.INS.1205	1	1	1	1	1
chr1	204375909	204376257	merge.INS.1206	1	1	1	1	1
chr1	204611685	204611751	merge.INS.1207	1	1	1	1	1
chr1	205065724	205065799	merge.INS.1208	1	1	1	1	1
chr1	205364906	205364984	merge.INS.1209	1	1	1	1	1
chr1	205496329	205496496	merge.INS.1210	1	1	1	1	1
chr1	205539971	205540069	merge.INS.1211	1	1	1	1	1
chr1	205544062	205544139	merge.INS.1212	1	1	1	1	1
chr1	205551903	205551981	merge.INS.1213	1	1	0	1	0
chr1	205551990	205552030	merge.INS.1214	1	1	1	1	0
chr1	205563460	205563502	merge.INS.1215	0	1	1	1	0
chr1	205603557	205603771	merge.INS.1216	1	1	1	1	1
chr1	205973080	205973394	merge.INS.1217	1	1	1	1	1
chr1	205974055	205974186	merge.INS.1218	1	1	1	1	1
chr1	205985709	205985970	merge.INS.1219	1	1	1	1	1
chr1	206064489	206064574	merge.INS.1220	1	1	1	1	1
chr1	206524551	206524728	merge.INS.1221	1	1	1	1	1
chr1	206691480	206691540	merge.INS.1222	1	1	1	1	1
chr1	206781852	206782164	merge.INS.1223	1	1	1	1	1
chr1	206828132	206828212	merge.INS.1224	1	1	1	1	1
chr1	206924051	206925550	merge.INS.1225	1	1	1	1	1
chr1	207076631	207076705	merge.INS.1226	1	1	1	1	1
chr1	207187164	207187217	merge.INS.1227	1	1	1	0	0
chr1	207213815	207214324	merge.INS.1228	1	1	1	1	1
chr1	207220798	207221146	merge.INS.1229	1	1	1	1	1
chr1	207494092	207494212	merge.INS.1230	1	1	1	1	1
chr1	207581293	207581383	merge.INS.1231	1	1	1	1	1
chr1	207848907	207848979	merge.INS.1232	1	1	1	1	0
chr1	208047294	208047401	merge.INS.1233	1	1	1	1	1
chr1	208267467	208267531	merge.INS.1234	1	1	1	1	1
chr1	208279259	208279334	merge.INS.1235	1	1	1	1	1
chr1	208300921	208301000	merge.INS.1236	1	1	1	1	1
chr1	208518137	208518457	merge.INS.1237	1	1	1	1	1
chr1	208565631	208565703	merge.INS.1238	1	1	1	1	1
chr1	209564591	209564670	merge.INS.1239	1	1	1	1	0
chr1	209593751	209593810	merge.INS.1240	1	1	1	1	1
chr1	209762727	209763071	merge.INS.1241	1	1	1	1	1
chr1	209990527	209990650	merge.INS.1242	1	1	1	1	1
chr1	210071264	210071337	merge.INS.1243	1	1	1	1	1
chr1	210526369	210526403	merge.INS.1244	0	1	0	1	0
chr1	210653887	210658793	merge.INS.1245	1	1	1	1	1
chr1	210718356	210718539	merge.INS.1246	1	1	1	1	1
chr1	210745036	210745281	merge.INS.1247	1	1	1	1	1
chr1	210806836	210806876	merge.INS.1248	1	1	1	1	0
chr1	211460604	211461349	merge.INS.1249	1	1	1	1	1
chr1	211609083	211609175	merge.INS.1250	1	1	1	1	1
chr1	212168575	212168610	merge.INS.1251	1	1	1	1	0
chr1	212186555	212186715	merge.INS.1252	1	1	1	1	1
chr1	212317394	212317431	merge.INS.1253	1	1	1	1	1
chr1	212725023	212725164	merge.INS.1254	1	1	1	1	1
chr1	212779700	212780127	merge.INS.1255	1	1	1	1	1
chr1	212801298	212803723	merge.INS.1256	1	1	1	0	1
chr1	212910238	212910302	merge.INS.1257	1	1	1	1	1
chr1	213118023	213118055	merge.INS.1258	1	1	1	1	0
chr1	213205538	213205572	merge.INS.1259	1	1	1	0	0
chr1	213327233	213327286	merge.INS.1260	1	1	1	1	0
chr1	213541160	213542351	merge.INS.1261	1	1	1	1	1
chr1	213740665	213740734	merge.INS.1262	1	1	1	1	1
chr1	213740921	213741089	merge.INS.1263	1	1	1	1	1
chr1	213962913	213962961	merge.INS.1264	1	1	1	1	0
chr1	214702028	214702072	merge.INS.1265	1	1	1	1	1
chr1	214796374	214796471	merge.INS.1266	1	1	1	1	1
chr1	214834050	214835405	merge.INS.1267	1	1	1	1	1
chr1	214848844	214848892	merge.INS.1268	0	1	1	1	0
chr1	214869227	214869467	merge.INS.1269	1	1	1	1	1
chr1	215022122	215022157	merge.INS.1270	0	1	1	1	1
chr1	215209559	215210054	merge.INS.1271	1	1	1	1	1
chr1	215238850	215238881	merge.INS.1272	1	1	1	0	1
chr1	215264842	215264909	merge.INS.1273	1	1	1	1	1
chr1	215743388	215743432	merge.INS.1274	1	1	1	0	1
chr1	215836457	215836677	merge.INS.1275	1	1	1	1	1
chr1	215912494	215912541	merge.INS.1276	1	1	1	1	1
chr1	216029994	216030068	merge.INS.1277	1	1	1	1	1
chr1	216050606	216050643	merge.INS.1278	1	1	0	1	0
chr1	216231241	216231697	merge.INS.1279	1	1	1	1	1
chr1	216511549	216511602	merge.INS.1280	1	1	1	1	1
chr1	216779287	216780069	merge.INS.1281	1	1	1	1	1
chr1	216851511	216851843	merge.INS.1282	1	1	1	1	1
chr1	217524837	217525263	merge.INS.1283	1	1	1	1	1
chr1	217749981	217750041	merge.INS.1284	1	1	1	1	0
chr1	217828482	217828822	merge.INS.1285	1	1	1	1	1
chr1	217996472	217996510	merge.INS.1286	1	1	1	1	0
chr1	218598657	218599390	merge.INS.1287	1	1	1	1	1
chr1	218720845	218720930	merge.INS.1288	1	1	1	1	1
chr1	218988269	218989540	merge.INS.1289	1	1	1	1	1
chr1	219010833	219010936	merge.INS.1290	1	1	1	1	1
chr1	219073313	219073368	merge.INS.1291	1	1	1	1	1
chr1	219074027	219074240	merge.INS.1292	1	1	1	1	1
chr1	219385559	219385887	merge.INS.1293	1	1	1	1	1
chr1	219475565	219475697	merge.INS.1294	1	1	1	1	1
chr1	219596392	219596462	merge.INS.1295	0	1	1	1	0
chr1	219904268	219906095	merge.INS.1296	1	1	1	1	1
chr1	219960669	219960779	merge.INS.1297	1	1	1	1	1
chr1	220012704	220013018	merge.INS.1298	1	1	1	1	1
chr1	220392431	220392514	merge.INS.1299	1	1	1	1	1
chr1	220466510	220466733	merge.INS.1300	1	1	1	1	1
chr1	220575996	220576337	merge.INS.1301	1	1	1	1	1
chr1	220844372	220844436	merge.INS.1302	1	1	1	1	1
chr1	220971665	220971730	merge.INS.1303	1	1	1	1	1
chr1	221520428	221520496	merge.INS.1304	1	1	1	1	1
chr1	221654461	221655104	merge.INS.1305	1	1	1	1	1
chr1	221795815	221796162	merge.INS.1306	1	1	1	1	1
chr1	222090174	222090259	merge.INS.1307	1	1	1	1	1
chr1	222138190	222138254	merge.INS.1308	1	1	1	1	1
chr1	222138406	222139103	merge.INS.1309	1	1	1	1	1
chr1	222487972	222488097	merge.INS.1310	1	1	1	1	0
chr1	222488715	222489018	merge.INS.1311	1	0	1	0	0
chr1	222697342	222697683	merge.INS.1312	1	1	1	1	1
chr1	222936823	222936993	merge.INS.1313	1	1	1	1	1
chr1	222951470	222951550	merge.INS.1314	1	1	1	1	1
chr1	223081185	223085355	merge.INS.1315	1	1	1	1	1
chr1	223478895	223480093	merge.INS.1316	1	1	1	1	1
chr1	223635543	223637479	merge.INS.1317	1	1	1	1	1
chr1	223723857	223724210	merge.INS.1318	1	1	1	1	1
chr1	224012496	224012942	merge.INS.1319	1	1	1	1	1
chr1	224014644	224014711	merge.INS.1320	1	1	1	1	1
chr1	224378517	224379207	merge.INS.1321	1	1	1	1	1
chr1	224750976	224751300	merge.INS.1322	1	1	1	1	1
chr1	225084812	225084902	merge.INS.1323	1	1	1	1	1
chr1	225335269	225335364	merge.INS.1324	1	1	1	1	1
chr1	225717471	225717577	merge.INS.1325	1	1	1	1	1
chr1	225807894	225808226	merge.INS.1326	1	1	1	1	1
chr1	225808718	225809052	merge.INS.1327	1	1	1	1	1
chr1	225933792	225933925	merge.INS.1328	1	1	1	1	0
chr1	225964515	225964797	merge.INS.1329	1	1	1	1	1
chr1	226114892	226115065	merge.INS.1330	1	1	1	1	1
chr1	226227771	226227931	merge.INS.1331	1	1	1	1	1
chr1	226622678	226622946	merge.INS.1332	1	1	1	1	1
chr1	226955495	226955721	merge.INS.1333	1	1	1	1	1
chr1	226960026	226960836	merge.INS.1334	1	1	1	1	1
chr1	227366183	227366340	merge.INS.1335	1	1	1	1	1
chr1	227433844	227433939	merge.INS.1336	1	1	1	1	0
chr1	227909616	227910032	merge.INS.1337	1	1	1	1	1
chr1	228005851	228005931	merge.INS.1338	1	1	1	1	1
chr1	228484116	228484671	merge.INS.1339	1	1	1	0	0
chr1	229188201	229188239	merge.INS.1340	0	0	1	1	1
chr1	229587096	229587264	merge.INS.1341	1	1	1	1	1
chr1	229628189	229628305	merge.INS.1342	1	1	1	1	1
chr1	229704060	229704118	merge.INS.1343	1	1	1	1	1
chr1	229870914	229871229	merge.INS.1344	1	1	1	1	1
chr1	229972004	229972283	merge.INS.1345	1	1	1	1	1
chr1	230175603	230175654	merge.INS.1346	1	1	1	1	1
chr1	230332007	230333114	merge.INS.1347	1	1	1	1	1
chr1	230335772	230335821	merge.INS.1348	0	1	1	1	0
chr1	230577853	230577936	merge.INS.1349	1	1	1	1	1
chr1	230588785	230588952	merge.INS.1350	1	1	1	1	1
chr1	230653527	230653636	merge.INS.1351	1	1	1	1	1
chr1	231011058	231011672	merge.INS.1352	1	1	1	1	1
chr1	231047340	231048544	merge.INS.1353	1	1	1	1	1
chr1	231052323	231052500	merge.INS.1354	1	1	1	1	1
chr1	231121824	231122423	merge.INS.1355	1	1	1	1	1
chr1	231202006	231202486	merge.INS.1356	1	1	1	1	1
chr1	231391052	231391335	merge.INS.1357	1	1	1	1	1
chr1	231615371	231615426	merge.INS.1358	1	1	1	1	0
chr1	231733094	231733153	merge.INS.1359	1	1	1	1	1
chr1	231907047	231907147	merge.INS.1360	1	1	1	1	1
chr1	232116518	232116989	merge.INS.1361	1	1	1	1	1
chr1	232312109	232312202	merge.INS.1362	1	1	1	1	1
chr1	232332042	232332716	merge.INS.1363	1	1	1	1	1
chr1	232369096	232369283	merge.INS.1364	1	1	1	1	1
chr1	232733516	232733972	merge.INS.1365	1	1	1	1	1
chr1	233513865	233514202	merge.INS.1366	1	1	1	1	1
chr1	233594484	233594525	merge.INS.1367	1	1	1	1	0
chr1	233594583	233594665	merge.INS.1368	1	0	1	0	1
chr1	233934806	233935130	merge.INS.1369	1	1	1	1	1
chr1	234108252	234108379	merge.INS.1370	1	1	1	1	1
chr1	234207358	234210041	merge.INS.1371	1	1	1	1	1
chr1	234247549	234248711	merge.INS.1372	1	1	1	1	1
chr1	234267902	234268001	merge.INS.1373	1	1	1	1	1
chr1	234308579	234308917	merge.INS.1374	1	1	1	1	1
chr1	234600203	234600255	merge.INS.1375	1	1	1	1	1
chr1	234669967	234670315	merge.INS.1376	1	1	1	1	1
chr1	234995654	234995795	merge.INS.1377	1	1	1	1	1
chr1	235026007	235026289	merge.INS.1378	1	1	1	1	1
chr1	235078486	235079357	merge.INS.1379	1	1	1	1	1
chr1	235255264	235255303	merge.INS.1380	1	1	1	1	1
chr1	235294407	235294663	merge.INS.1381	1	1	1	1	1
chr1	235296837	235296920	merge.INS.1382	1	1	1	1	1
chr1	235309346	235309462	merge.INS.1383	1	1	1	1	1
chr1	235309594	235309776	merge.INS.1384	1	0	1	1	0
chr1	235409805	235413671	merge.INS.1385	1	1	1	1	1
chr1	235587433	235588183	merge.INS.1386	1	1	1	1	1
chr1	235635563	235635747	merge.INS.1387	1	1	1	1	1
chr1	235650244	235650316	merge.INS.1388	1	1	1	1	1
chr1	236038908	236038958	merge.INS.1389	1	1	0	1	0
chr1	236097077	236104192	merge.INS.1390	1	1	1	1	1
chr1	236186264	236186384	merge.INS.1391	1	1	1	1	1
chr1	236239803	236239941	merge.INS.1392	1	1	1	1	1
chr1	236245316	236245403	merge.INS.1393	0	1	1	1	0
chr1	236245483	236245662	merge.INS.1394	1	1	1	1	1
chr1	236495199	236495296	merge.INS.1395	1	1	1	1	1
chr1	236498180	236499320	merge.INS.1396	1	1	1	1	1
chr1	236632892	236633052	merge.INS.1397	1	1	1	1	1
chr1	236713595	236720541	merge.INS.1398	1	1	1	1	1
chr1	236737258	236737431	merge.INS.1399	1	1	1	1	1
chr1	236897302	236897340	merge.INS.1400	1	1	1	1	1
chr1	237035919	237036034	merge.INS.1401	1	1	1	1	1
chr1	237237927	237238054	merge.INS.1402	1	1	1	1	1
chr1	237284497	237284549	merge.INS.1403	1	1	1	1	1
chr1	237286557	237286770	merge.INS.1404	1	1	1	1	1
chr1	237307914	237308003	merge.INS.1405	1	1	1	1	1
chr1	237405896	237406247	merge.INS.1406	1	1	1	1	1
chr1	237473421	237473527	merge.INS.1407	1	1	1	1	1
chr1	237515720	237515892	merge.INS.1408	1	1	1	1	1
chr1	237789507	237789581	merge.INS.1409	1	1	1	1	1
chr1	238051655	238051956	merge.INS.1410	1	1	1	1	1
chr1	238627500	238627549	merge.INS.1411	1	1	1	1	1
chr1	238641754	238642649	merge.INS.1412	1	1	1	1	1
chr1	239188029	239188124	merge.INS.1413	1	1	1	1	1
chr1	239262956	239263281	merge.INS.1414	1	1	1	1	1
chr1	239407419	239407467	merge.INS.1415	1	1	1	1	1
chr1	239662877	239662990	merge.INS.1416	1	1	1	1	1
chr1	239874266	239874357	merge.INS.1417	1	1	1	1	1
chr1	239975512	239975591	merge.INS.1418	1	1	1	1	1
chr1	240184927	240187188	merge.INS.1419	1	1	1	1	1
chr1	240536569	240536824	merge.INS.1420	1	1	1	1	1
chr1	240652223	240652290	merge.INS.1421	1	1	1	1	1
chr1	240777837	240778127	merge.INS.1422	1	1	1	1	1
chr1	241068240	241068284	merge.INS.1423	1	1	1	1	1
chr1	241089065	241089196	merge.INS.1424	0	1	1	1	0
chr1	241188222	241188318	merge.INS.1425	1	1	1	1	1
chr1	241235911	241235945	merge.INS.1426	1	1	1	1	1
chr1	241259669	241259709	merge.INS.1427	1	1	1	1	1
chr1	241614679	241614957	merge.INS.1428	1	1	1	1	1
chr1	241674898	241675517	merge.INS.1429	1	1	1	1	1
chr1	241745307	241745636	merge.INS.1430	1	1	1	1	1
chr1	241920573	241921133	merge.INS.1431	1	1	1	1	1
chr1	242337259	242337324	merge.INS.1432	1	1	1	1	1
chr1	242394804	242394863	merge.INS.1433	0	1	1	0	0
chr1	242394971	242395199	merge.INS.1434	1	1	1	1	1
chr1	242444691	242444762	merge.INS.1435	1	1	1	1	1
chr1	242544773	242544811	merge.INS.1436	1	1	1	1	0
chr1	242695153	242695213	merge.INS.1437	1	1	1	1	1
chr1	242733703	242733934	merge.INS.1438	1	1	1	1	1
chr1	242904279	242904373	merge.INS.1439	1	1	1	1	1
chr1	242951646	242952021	merge.INS.1440	1	1	1	1	1
chr1	242956342	242957035	merge.INS.1441	1	1	1	1	1
chr1	243085753	243085807	merge.INS.1442	1	1	1	1	1
chr1	243214580	243214917	merge.INS.1443	1	1	1	1	1
chr1	243327259	243327460	merge.INS.1444	1	1	1	1	1
chr1	243480302	243481570	merge.INS.1445	1	1	1	1	1
chr1	243686632	243686686	merge.INS.1446	1	1	0	1	0
chr1	243845394	243849771	merge.INS.1447	1	1	1	1	1
chr1	243998721	243998879	merge.INS.1448	1	1	1	1	1
chr1	244263410	244263610	merge.INS.1449	1	1	1	1	1
chr1	244373332	244373376	merge.INS.1450	1	1	1	1	1
chr1	244480643	244480678	merge.INS.1451	1	1	1	1	1
chr1	244718669	244718747	merge.INS.1452	1	1	1	1	1
chr1	244792984	244795452	merge.INS.1453	1	1	1	1	1
chr1	244937044	244938237	merge.INS.1454	1	1	1	1	1
chr1	244941427	244941571	merge.INS.1455	1	1	1	1	1
chr1	245102858	245104256	merge.INS.1456	1	1	1	1	1
chr1	245130381	245130417	merge.INS.1457	1	1	1	1	1
chr1	245269191	245269326	merge.INS.1458	1	1	1	1	1
chr1	245270210	245270385	merge.INS.1459	1	1	1	1	1
chr1	245556258	245556424	merge.INS.1460	1	1	1	1	1
chr1	245600129	245600443	merge.INS.1461	1	1	1	1	1
chr1	245640124	245640227	merge.INS.1462	1	1	1	1	1
chr1	245660288	245664099	merge.INS.1463	1	1	1	1	1
chr1	245682401	245682988	merge.INS.1464	1	1	1	1	1
chr1	245798397	245798863	merge.INS.1465	1	1	1	1	1
chr1	245799450	245799492	merge.INS.1466	0	1	1	1	1
chr1	245826004	245826348	merge.INS.1467	1	1	1	1	1
chr1	245857511	245857554	merge.INS.1468	1	1	1	1	1
chr1	245974774	245975439	merge.INS.1469	1	1	1	1	0
chr1	245975696	245977176	merge.INS.1470	1	1	1	1	1
chr1	245991740	245991847	merge.INS.1471	1	0	1	0	0
chr1	245991864	245992404	merge.INS.1472	1	1	1	1	1
chr1	245992621	245993052	merge.INS.1473	1	1	1	1	1
chr1	246009972	246010381	merge.INS.1474	1	1	1	1	1
chr1	246024295	246025684	merge.INS.1475	1	1	1	1	1
chr1	246200021	246200422	merge.INS.1476	1	1	1	1	1
chr1	246232716	246233539	merge.INS.1477	1	1	1	1	1
chr1	246324986	246326296	merge.INS.1478	1	1	1	1	1
chr1	246348062	246348115	merge.INS.1479	1	1	1	1	1
chr1	246378801	246378850	merge.INS.1480	1	1	1	1	1
chr1	246402368	246402566	merge.INS.1481	1	1	1	1	1
chr1	246428639	246428876	merge.INS.1482	1	1	1	1	1
chr1	246478336	246478427	merge.INS.1483	1	1	1	1	0
chr1	246478442	246478537	merge.INS.1484	1	1	1	1	1
chr1	246481609	246481642	merge.INS.1485	1	1	1	1	0
chr1	246576168	246576659	merge.INS.1486	1	1	1	1	1
chr1	246605717	246605896	merge.INS.1487	1	1	1	1	1
chr1	246613658	246614607	merge.INS.1488	1	1	1	1	1
chr1	246627882	246628007	merge.INS.1489	1	1	1	1	1
chr1	246642807	246643750	merge.INS.1490	1	1	1	1	1
chr1	246652743	246653008	merge.INS.1491	1	1	1	1	1
chr1	246710365	246710500	merge.INS.1492	1	1	1	1	1
chr1	246785644	246786449	merge.INS.1493	1	1	1	1	1
chr1	246945159	246945822	merge.INS.1494	1	1	1	1	1
chr1	247032561	247032758	merge.INS.1495	1	1	1	1	1
chr1	247116526	247116657	merge.INS.1496	1	1	0	1	0
chr1	247116693	247119166	merge.INS.1497	1	1	1	1	1
chr1	247128847	247130812	merge.INS.1498	1	1	1	1	1
chr1	247176186	247176281	merge.INS.1499	1	1	1	1	1
chr1	247198604	247198640	merge.INS.1500	1	1	1	1	1
chr1	247199610	247199855	merge.INS.1501	1	1	1	1	1
chr1	247363100	247365980	merge.INS.1502	1	1	1	1	1
chr1	247405655	247405767	merge.INS.1503	1	1	1	1	1
chr1	247410875	247413695	merge.INS.1504	1	1	1	1	1
chr1	247427460	247428172	merge.INS.1505	1	1	1	1	1
chr1	247434049	247434121	merge.INS.1506	1	1	1	1	1
chr1	247471128	247471348	merge.INS.1507	1	1	1	1	1
chr1	247471664	247471857	merge.INS.1508	1	1	1	1	1
chr1	247649217	247650033	merge.INS.1509	1	1	1	1	0
chr1	247700847	247700916	merge.INS.1510	1	1	1	1	1
chr1	247789012	247789048	merge.INS.1511	1	1	1	1	1
chr1	247870260	247871885	merge.INS.1512	1	1	1	1	1
chr1	247894399	247894791	merge.INS.1513	1	1	1	1	1
chr1	247937457	247937868	merge.INS.1514	1	1	1	1	1
chr1	248085400	248085489	merge.INS.1515	1	1	1	1	1
chr1	248103032	248103230	merge.INS.1516	1	1	1	1	1
chr1	248306438	248307293	merge.INS.1517	1	1	1	1	1
chr1	248383028	248384994	merge.INS.1518	1	1	1	1	1
chr1	248404197	248412353	merge.INS.1519	1	1	1	1	1
chr1	248444848	248444966	merge.INS.1520	1	1	1	1	1
chr1	248647147	248647270	merge.INS.1521	1	1	1	1	1
chr1	248742152	248743165	merge.INS.1522	1	1	1	1	1
chr1	248744506	248744611	merge.INS.1523	1	1	1	1	0
chr1	248744620	248744657	merge.INS.1524	1	0	1	1	0
chr1	248775664	248775840	merge.INS.1525	1	1	1	1	1
chr1	248802811	248803769	merge.INS.1526	1	1	1	1	1
chr1	248854555	248854607	merge.INS.1527	1	1	1	1	1
chr1	248911636	248911917	merge.INS.1528	1	1	1	1	1
chr1	248937890	248938273	merge.INS.1529	1	1	1	1	0
chr1	248938436	248938705	merge.INS.1530	1	1	1	1	1
chr1	248944946	248945204	merge.INS.1531	1	1	1	1	1
chr1	248945550	248946865	merge.INS.1532	1	1	1	1	1
chr10	79690	79819	merge.INS.1533	1	1	1	1	1
chr10	105348	105567	merge.INS.1534	1	1	1	1	1
chr10	196931	197598	merge.INS.1535	1	1	1	1	1
chr10	264851	265148	merge.INS.1536	1	1	1	1	1
chr10	300594	300877	merge.INS.1537	1	1	1	1	1
chr10	321529	324246	merge.INS.1538	1	1	1	1	0
chr10	337240	337379	merge.INS.1539	1	1	1	1	1
chr10	337802	337855	merge.INS.1540	1	1	1	1	1
chr10	345909	346057	merge.INS.1541	1	1	1	1	0
chr10	346127	346510	merge.INS.1542	1	1	1	1	0
chr10	346561	347469	merge.INS.1543	1	1	1	1	1
chr10	347765	348279	merge.INS.1544	1	1	1	1	1
chr10	371626	371790	merge.INS.1545	1	1	1	1	1
chr10	380298	380452	merge.INS.1546	1	1	1	1	1
chr10	394438	394599	merge.INS.1547	1	1	1	1	1
chr10	417601	419976	merge.INS.1548	1	1	1	1	1
chr10	429371	429597	merge.INS.1549	0	1	1	1	1
chr10	447182	448216	merge.INS.1550	1	1	1	1	1
chr10	455246	456191	merge.INS.1551	1	1	1	1	1
chr10	523211	523687	merge.INS.1552	1	1	1	1	1
chr10	541388	541986	merge.INS.1553	1	1	1	1	1
chr10	556101	556759	merge.INS.1554	1	1	1	1	1
chr10	608558	608880	merge.INS.1555	1	0	0	1	1
chr10	639083	639459	merge.INS.1556	1	1	1	1	1
chr10	655839	656627	merge.INS.1557	1	1	1	1	1
chr10	679477	679637	merge.INS.1558	1	1	1	1	0
chr10	717732	719732	merge.INS.1559	1	1	1	1	1
chr10	723210	723309	merge.INS.1560	1	0	0	1	0
chr10	731029	731191	merge.INS.1561	1	1	1	1	1
chr10	735396	737471	merge.INS.1562	1	1	1	1	1
chr10	737574	738771	merge.INS.1563	1	1	1	1	1
chr10	744115	745313	merge.INS.1564	1	1	1	1	1
chr10	793830	793927	merge.INS.1565	1	1	1	1	0
chr10	794106	794333	merge.INS.1566	1	1	1	1	1
chr10	952491	953691	merge.INS.1567	1	1	1	1	1
chr10	1010762	1011349	merge.INS.1568	1	1	1	1	1
chr10	1011392	1011617	merge.INS.1569	1	1	1	1	1
chr10	1015350	1015718	merge.INS.1570	1	1	1	1	1
chr10	1163392	1163606	merge.INS.1571	1	1	1	1	1
chr10	1174081	1174814	merge.INS.1572	1	1	1	1	1
chr10	1212658	1213002	merge.INS.1573	1	1	1	1	1
chr10	1229679	1229853	merge.INS.1574	1	1	1	1	1
chr10	1235480	1235679	merge.INS.1575	0	1	1	1	0
chr10	1236637	1237084	merge.INS.1576	1	0	1	1	0
chr10	1237090	1237332	merge.INS.1577	1	0	1	1	0
chr10	1237356	1240412	merge.INS.1578	1	1	1	1	0
chr10	1250039	1250389	merge.INS.1579	1	1	1	1	1
chr10	1265509	1266215	merge.INS.1580	1	1	1	1	1
chr10	1326770	1327849	merge.INS.1581	1	1	1	1	1
chr10	1340299	1340876	merge.INS.1582	1	1	1	1	1
chr10	1368830	1368985	merge.INS.1583	1	1	1	1	1
chr10	1373749	1374172	merge.INS.1584	1	1	1	1	1
chr10	1460096	1460352	merge.INS.1585	1	1	1	1	1
chr10	1473916	1474108	merge.INS.1586	1	1	1	1	1
chr10	1529937	1529973	merge.INS.1587	1	1	1	1	1
chr10	1558237	1559061	merge.INS.1588	1	1	1	1	0
chr10	1560431	1560664	merge.INS.1589	1	1	1	1	1
chr10	1575020	1575106	merge.INS.1590	1	1	1	1	1
chr10	1575975	1576198	merge.INS.1591	1	1	1	1	1
chr10	1577156	1577846	merge.INS.1592	1	1	1	1	1
chr10	1592257	1593807	merge.INS.1593	1	1	1	1	1
chr10	1617188	1617795	merge.INS.1594	1	1	1	1	1
chr10	1626138	1626573	merge.INS.1595	1	1	1	1	1
chr10	1633537	1633662	merge.INS.1596	1	1	1	1	1
chr10	1672642	1672884	merge.INS.1597	1	1	1	1	1
chr10	1674933	1675175	merge.INS.1598	1	1	1	1	1
chr10	1867895	1868003	merge.INS.1599	1	1	1	1	1
chr10	1987591	1987731	merge.INS.1600	1	1	1	1	1
chr10	2035350	2035684	merge.INS.1601	1	1	1	1	1
chr10	2048908	2049099	merge.INS.1602	1	1	1	1	1
chr10	2050131	2050229	merge.INS.1603	1	1	1	1	1
chr10	2178629	2178665	merge.INS.1604	1	1	1	1	1
chr10	2178809	2179026	merge.INS.1605	1	1	1	1	1
chr10	2198805	2199149	merge.INS.1606	1	1	1	1	1
chr10	2231767	2232794	merge.INS.1607	1	1	1	1	1
chr10	2235859	2235905	merge.INS.1608	1	1	1	1	1
chr10	2241923	2242106	merge.INS.1609	1	1	1	1	1
chr10	2315064	2315380	merge.INS.1610	1	1	1	1	1
chr10	2360696	2360847	merge.INS.1611	1	1	1	1	1
chr10	2392379	2392664	merge.INS.1612	1	1	1	1	1
chr10	2501457	2501586	merge.INS.1613	1	1	1	1	1
chr10	2521404	2521662	merge.INS.1614	1	1	1	1	1
chr10	2521663	2521823	merge.INS.1615	1	1	1	1	0
chr10	2521833	2522286	merge.INS.1616	1	1	1	1	1
chr10	2522508	2522657	merge.INS.1617	1	0	0	1	0
chr10	2523321	2523641	merge.INS.1618	1	1	1	1	0
chr10	2526179	2526277	merge.INS.1619	1	1	1	1	1
chr10	2526526	2526643	merge.INS.1620	1	1	1	1	1
chr10	2536317	2536469	merge.INS.1621	1	1	1	1	1
chr10	2562624	2562872	merge.INS.1622	1	1	1	1	1
chr10	2583805	2584095	merge.INS.1623	1	1	1	1	1
chr10	2584156	2584220	merge.INS.1624	1	1	1	1	0
chr10	2584284	2584375	merge.INS.1625	1	1	1	1	0
chr10	2667016	2667440	merge.INS.1626	1	1	1	1	1
chr10	2679063	2679404	merge.INS.1627	1	1	1	1	1
chr10	2750744	2750781	merge.INS.1628	1	1	1	1	1
chr10	2906971	2907495	merge.INS.1629	1	1	1	1	1
chr10	3041558	3043740	merge.INS.1630	1	1	1	1	1
chr10	3062538	3062629	merge.INS.1631	1	1	1	1	1
chr10	3084695	3084822	merge.INS.1632	1	1	1	1	1
chr10	3085759	3085982	merge.INS.1633	1	1	1	1	1
chr10	3095234	3095302	merge.INS.1634	1	1	1	1	1
chr10	3106618	3106888	merge.INS.1635	1	1	1	1	1
chr10	3205925	3206466	merge.INS.1636	1	1	1	1	1
chr10	3242714	3242922	merge.INS.1637	1	1	1	1	1
chr10	3276709	3276811	merge.INS.1638	1	1	1	1	1
chr10	3314295	3315706	merge.INS.1639	1	1	1	1	1
chr10	3397981	3398114	merge.INS.1640	1	1	1	1	1
chr10	3411197	3412537	merge.INS.1641	1	1	1	1	1
chr10	3431105	3431817	merge.INS.1642	1	1	1	1	1
chr10	3457386	3457711	merge.INS.1643	1	1	1	1	1
chr10	3468888	3468926	merge.INS.1644	1	1	1	1	1
chr10	3526818	3527145	merge.INS.1645	1	1	1	1	1
chr10	3648649	3648885	merge.INS.1646	1	1	1	1	1
chr10	3752764	3753068	merge.INS.1647	1	1	1	1	1
chr10	3760817	3760874	merge.INS.1648	1	1	1	1	0
chr10	3930386	3930512	merge.INS.1649	1	1	1	1	1
chr10	4064629	4064689	merge.INS.1650	1	1	1	1	1
chr10	4117391	4117743	merge.INS.1651	1	1	1	1	1
chr10	4149432	4149753	merge.INS.1652	1	1	1	1	1
chr10	4205890	4205948	merge.INS.1653	1	1	1	1	1
chr10	4495848	4496489	merge.INS.1654	1	1	1	1	1
chr10	4692151	4692434	merge.INS.1655	1	1	1	1	1
chr10	4754175	4754233	merge.INS.1656	1	1	1	1	1
chr10	4863652	4863799	merge.INS.1657	1	1	1	1	1
chr10	4961554	4961889	merge.INS.1658	1	1	1	1	1
chr10	5005403	5006009	merge.INS.1659	1	0	1	1	0
chr10	5032196	5032310	merge.INS.1660	1	1	1	1	1
chr10	5045727	5045838	merge.INS.1661	1	1	1	1	1
chr10	5169109	5170737	merge.INS.1662	1	1	1	1	1
chr10	5370165	5370414	merge.INS.1663	1	1	1	1	1
chr10	5521225	5521259	merge.INS.1664	1	1	1	1	0
chr10	5563317	5563486	merge.INS.1665	1	1	1	1	1
chr10	5577044	5577907	merge.INS.1666	1	1	1	1	1
chr10	5639725	5639796	merge.INS.1667	1	1	1	1	1
chr10	5916542	5916905	merge.INS.1668	1	1	1	1	1
chr10	5985232	5985345	merge.INS.1669	1	1	1	1	1
chr10	6127445	6127683	merge.INS.1670	1	1	1	1	1
chr10	6177410	6177526	merge.INS.1671	1	1	1	1	0
chr10	6206492	6206639	merge.INS.1672	1	1	1	1	1
chr10	6206803	6206916	merge.INS.1673	1	1	1	1	1
chr10	6281168	6281202	merge.INS.1674	1	1	1	1	1
chr10	6283542	6283578	merge.INS.1675	1	1	1	1	1
chr10	6646747	6647075	merge.INS.1676	1	1	1	1	1
chr10	6723798	6723851	merge.INS.1677	1	1	1	1	1
chr10	6773154	6773297	merge.INS.1678	1	1	1	1	1
chr10	6773309	6773345	merge.INS.1679	1	1	1	1	0
chr10	6819375	6819505	merge.INS.1680	1	1	1	1	1
chr10	6836587	6836699	merge.INS.1681	1	1	1	1	1
chr10	6852728	6852770	merge.INS.1682	0	1	1	1	1
chr10	6894553	6894993	merge.INS.1683	1	1	1	1	1
chr10	6969180	6969296	merge.INS.1684	1	1	1	1	1
chr10	6988551	6988613	merge.INS.1685	1	1	1	1	1
chr10	7378158	7378680	merge.INS.1686	1	1	1	1	1
chr10	7513156	7513295	merge.INS.1687	0	1	1	1	1
chr10	7521507	7521554	merge.INS.1688	1	1	0	1	0
chr10	7526504	7527627	merge.INS.1689	1	1	1	1	1
chr10	7593337	7593882	merge.INS.1690	1	1	1	1	1
chr10	7624806	7624951	merge.INS.1691	1	1	1	1	1
chr10	7672958	7673064	merge.INS.1692	1	1	1	1	1
chr10	7681833	7681920	merge.INS.1693	1	0	1	1	0
chr10	7687693	7688115	merge.INS.1694	1	1	1	1	1
chr10	7719923	7720221	merge.INS.1695	1	1	1	1	1
chr10	7737683	7737726	merge.INS.1696	1	1	1	1	1
chr10	7863690	7863808	merge.INS.1697	1	1	1	1	1
chr10	7901013	7901058	merge.INS.1698	1	1	1	1	1
chr10	8268511	8268777	merge.INS.1699	1	1	0	1	0
chr10	8269769	8270185	merge.INS.1700	1	1	1	1	1
chr10	8296918	8297363	merge.INS.1701	1	1	1	1	1
chr10	8362683	8362814	merge.INS.1702	1	1	1	1	1
chr10	8363039	8363141	merge.INS.1703	1	1	0	1	1
chr10	8381602	8381693	merge.INS.1704	1	1	1	1	1
chr10	8562763	8562994	merge.INS.1705	1	1	1	1	1
chr10	8681487	8681546	merge.INS.1706	1	1	1	0	1
chr10	8806636	8807164	merge.INS.1707	0	1	0	1	1
chr10	8869240	8869799	merge.INS.1708	1	1	1	1	1
chr10	8985438	8986160	merge.INS.1709	1	1	1	1	1
chr10	9033380	9033451	merge.INS.1710	1	1	1	1	1
chr10	9273968	9274105	merge.INS.1711	1	1	1	1	1
chr10	9321009	9321117	merge.INS.1712	0	1	1	1	0
chr10	9364767	9367024	merge.INS.1713	1	1	1	1	1
chr10	9432885	9433214	merge.INS.1714	1	1	1	1	1
chr10	9469020	9469356	merge.INS.1715	1	1	1	1	1
chr10	9472008	9472234	merge.INS.1716	1	1	1	1	1
chr10	9504949	9505099	merge.INS.1717	1	1	1	1	1
chr10	9595045	9595087	merge.INS.1718	1	1	1	1	1
chr10	9691433	9691485	merge.INS.1719	1	1	1	1	1
chr10	9713798	9713939	merge.INS.1720	1	1	1	1	1
chr10	9854421	9854538	merge.INS.1721	1	1	1	1	1
chr10	10193242	10193309	merge.INS.1722	1	1	1	1	1
chr10	10323520	10323874	merge.INS.1723	1	1	1	1	1
chr10	11107970	11108522	merge.INS.1724	1	1	1	1	1
chr10	11197004	11197132	merge.INS.1725	1	1	1	1	1
chr10	11283837	11285579	merge.INS.1726	1	1	1	1	1
chr10	11545750	11545837	merge.INS.1727	1	1	1	1	1
chr10	11682590	11682738	merge.INS.1728	1	1	1	1	1
chr10	11742313	11742414	merge.INS.1729	1	1	1	1	1
chr10	11885298	11886087	merge.INS.1730	1	1	1	1	1
chr10	12068041	12068109	merge.INS.1731	1	0	1	1	0
chr10	12331320	12331672	merge.INS.1732	1	1	1	1	1
chr10	12401010	12401416	merge.INS.1733	1	1	1	1	1
chr10	12413576	12414450	merge.INS.1734	1	1	1	1	1
chr10	12415208	12415527	merge.INS.1735	0	1	1	1	1
chr10	12449553	12449680	merge.INS.1736	1	1	1	1	1
chr10	12545226	12545279	merge.INS.1737	1	1	1	1	1
chr10	12623124	12623424	merge.INS.1738	0	1	1	1	1
chr10	12623425	12623602	merge.INS.1739	0	1	1	1	1
chr10	12625616	12625968	merge.INS.1740	0	1	1	1	1
chr10	12693988	12694064	merge.INS.1741	1	1	1	1	0
chr10	12694076	12694192	merge.INS.1742	1	1	1	1	1
chr10	12775074	12775218	merge.INS.1743	1	1	1	1	0
chr10	12775225	12775269	merge.INS.1744	0	0	0	1	0
chr10	12775275	12775824	merge.INS.1745	1	1	1	1	0
chr10	12775832	12775995	merge.INS.1746	1	1	1	1	0
chr10	12776042	12776253	merge.INS.1747	1	1	1	1	0
chr10	12825126	12825285	merge.INS.1748	1	1	1	1	1
chr10	12966173	12966352	merge.INS.1749	1	1	1	1	1
chr10	13241669	13242069	merge.INS.1750	1	1	1	1	1
chr10	13714022	13714070	merge.INS.1751	0	1	1	0	0
chr10	13804525	13804601	merge.INS.1752	1	1	1	1	1
chr10	13921264	13921303	merge.INS.1753	1	1	1	1	0
chr10	14097974	14098171	merge.INS.1754	1	1	1	1	1
chr10	14319345	14319421	merge.INS.1755	1	1	1	1	1
chr10	14354683	14355023	merge.INS.1756	1	1	1	1	1
chr10	14442804	14443139	merge.INS.1757	1	1	1	1	1
chr10	14495777	14496104	merge.INS.1758	1	1	1	1	1
chr10	14568306	14568919	merge.INS.1759	1	1	1	1	1
chr10	14629250	14629312	merge.INS.1760	1	1	1	1	1
chr10	14737763	14737862	merge.INS.1761	0	1	1	1	0
chr10	15149399	15149997	merge.INS.1762	1	1	1	1	1
chr10	15209301	15213236	merge.INS.1763	1	1	1	1	1
chr10	15229766	15230112	merge.INS.1764	1	1	1	1	1
chr10	15337582	15337736	merge.INS.1765	1	1	1	1	1
chr10	15369201	15369285	merge.INS.1766	1	1	1	1	1
chr10	15434588	15434652	merge.INS.1767	1	1	1	1	0
chr10	15445465	15445571	merge.INS.1768	1	1	1	1	0
chr10	15531377	15531461	merge.INS.1769	1	1	1	0	1
chr10	15694324	15694452	merge.INS.1770	1	1	1	1	1
chr10	15941323	15941415	merge.INS.1771	1	1	1	1	1
chr10	16323449	16323768	merge.INS.1772	1	1	1	1	1
chr10	16403785	16403924	merge.INS.1773	1	1	1	1	1
chr10	16722833	16722907	merge.INS.1774	1	1	1	1	0
chr10	17554876	17555051	merge.INS.1775	1	1	1	1	1
chr10	17591780	17591846	merge.INS.1776	1	1	1	1	1
chr10	17629080	17629367	merge.INS.1777	1	1	1	1	1
chr10	17950546	17950766	merge.INS.1778	1	1	1	1	1
chr10	18499639	18499773	merge.INS.1779	1	1	1	1	1
chr10	18566005	18566315	merge.INS.1780	1	1	1	1	1
chr10	18927723	18928598	merge.INS.1781	1	1	1	1	1
chr10	19165244	19165276	merge.INS.1782	1	1	1	1	0
chr10	19238068	19238542	merge.INS.1783	1	1	1	1	1
chr10	19315164	19315990	merge.INS.1784	1	1	1	1	1
chr10	19497366	19497672	merge.INS.1785	1	1	1	1	1
chr10	19644464	19644527	merge.INS.1786	1	1	1	1	1
chr10	19966357	19966515	merge.INS.1787	1	1	1	1	1
chr10	20014258	20014586	merge.INS.1788	1	1	1	1	1
chr10	20044096	20044164	merge.INS.1789	1	1	1	1	1
chr10	20238670	20238739	merge.INS.1790	1	1	1	1	1
chr10	20546131	20546581	merge.INS.1791	1	1	1	1	1
chr10	20903890	20904226	merge.INS.1792	1	1	1	1	1
chr10	21028250	21028318	merge.INS.1793	1	1	1	1	1
chr10	21325887	21326047	merge.INS.1794	1	1	1	1	1
chr10	21326237	21326303	merge.INS.1795	1	1	1	1	1
chr10	21430488	21430829	merge.INS.1796	1	1	1	1	1
chr10	21737165	21737202	merge.INS.1797	1	1	1	1	1
chr10	22516673	22516710	merge.INS.1798	1	1	1	1	1
chr10	23134545	23134651	merge.INS.1799	1	1	1	1	1
chr10	23331118	23331269	merge.INS.1800	1	1	1	1	1
chr10	23331312	23332621	merge.INS.1801	1	1	1	1	1
chr10	23486750	23487106	merge.INS.1802	1	1	1	1	1
chr10	23508107	23508683	merge.INS.1803	1	1	1	1	1
chr10	23790204	23790372	merge.INS.1804	1	1	1	1	1
chr10	24557915	24558220	merge.INS.1805	1	1	1	1	1
chr10	24588349	24588465	merge.INS.1806	1	1	1	1	1
chr10	24656684	24657001	merge.INS.1807	1	1	1	1	1
chr10	24742851	24742917	merge.INS.1808	1	1	1	1	1
chr10	25454272	25454572	merge.INS.1809	1	1	1	1	1
chr10	25668386	25668718	merge.INS.1810	1	1	1	1	1
chr10	25724294	25724366	merge.INS.1811	1	1	1	1	1
chr10	25756464	25756729	merge.INS.1812	1	1	1	1	1
chr10	25874540	25874659	merge.INS.1813	1	1	1	1	1
chr10	26432529	26432596	merge.INS.1814	1	1	1	1	1
chr10	26564034	26564365	merge.INS.1815	1	1	1	1	1
chr10	26572111	26573363	merge.INS.1816	0	1	0	1	1
chr10	26573618	26573945	merge.INS.1817	0	0	1	1	1
chr10	26580425	26580515	merge.INS.1818	1	1	1	1	1
chr10	26586658	26587177	merge.INS.1819	1	1	1	1	1
chr10	26587709	26588000	merge.INS.1820	1	1	1	1	1
chr10	26624752	26627820	merge.INS.1821	1	1	1	1	0
chr10	26631559	26631611	merge.INS.1822	1	1	1	1	0
chr10	26641485	26641553	merge.INS.1823	1	1	1	1	0
chr10	26641794	26642120	merge.INS.1824	0	1	0	1	0
chr10	26643422	26643590	merge.INS.1825	0	1	1	1	0
chr10	26672152	26672349	merge.INS.1826	1	1	1	1	1
chr10	26693080	26693137	merge.INS.1827	1	1	1	1	1
chr10	26891232	26891279	merge.INS.1828	1	1	1	1	0
chr10	26938144	26938426	merge.INS.1829	1	1	1	1	0
chr10	26942154	26942206	merge.INS.1830	0	1	1	0	0
chr10	26945850	26946233	merge.INS.1831	1	1	1	1	0
chr10	27296159	27297044	merge.INS.1832	1	1	1	1	1
chr10	27312250	27313567	merge.INS.1833	1	1	1	1	1
chr10	27331410	27331961	merge.INS.1834	1	1	1	1	1
chr10	27355658	27356085	merge.INS.1835	1	1	1	1	1
chr10	27382794	27382826	merge.INS.1836	1	1	1	1	1
chr10	27401196	27401241	merge.INS.1837	1	1	1	1	1
chr10	27407301	27407425	merge.INS.1838	1	1	1	1	1
chr10	27640991	27641318	merge.INS.1839	1	1	1	1	1
chr10	27753104	27753507	merge.INS.1840	1	1	1	1	1
chr10	27924032	27924112	merge.INS.1841	1	1	1	1	1
chr10	28373401	28373485	merge.INS.1842	1	1	1	1	1
chr10	28460764	28460800	merge.INS.1843	1	0	1	1	0
chr10	28505625	28505973	merge.INS.1844	1	1	1	1	1
chr10	28649690	28650565	merge.INS.1845	1	1	1	1	1
chr10	28813600	28813930	merge.INS.1846	1	1	1	1	1
chr10	28816354	28816686	merge.INS.1847	1	1	1	1	1
chr10	28888777	28889158	merge.INS.1848	1	1	1	1	1
chr10	28902094	28902335	merge.INS.1849	1	1	1	1	1
chr10	29125690	29125822	merge.INS.1850	1	1	1	1	1
chr10	29241802	29242069	merge.INS.1851	1	1	1	1	1
chr10	29506618	29506939	merge.INS.1852	1	1	1	1	1
chr10	29697145	29697266	merge.INS.1853	1	1	1	1	1
chr10	29789412	29789484	merge.INS.1854	1	1	1	1	1
chr10	29903283	29903364	merge.INS.1855	1	1	1	1	1
chr10	29903371	29903419	merge.INS.1856	1	1	0	1	0
chr10	29938902	29938950	merge.INS.1857	1	1	1	1	1
chr10	30432974	30433072	merge.INS.1858	1	1	1	1	1
chr10	30607171	30607323	merge.INS.1859	1	1	1	1	1
chr10	30677430	30677698	merge.INS.1860	1	1	1	1	1
chr10	30677741	30677859	merge.INS.1861	1	0	1	1	1
chr10	30778981	30779166	merge.INS.1862	1	1	1	1	1
chr10	30794327	30794575	merge.INS.1863	1	1	1	1	1
chr10	31049597	31049631	merge.INS.1864	1	1	1	1	1
chr10	31687151	31688259	merge.INS.1865	1	1	1	1	1
chr10	32006438	32006480	merge.INS.1866	1	1	1	1	1
chr10	32115387	32115424	merge.INS.1867	1	1	1	1	0
chr10	32164946	32165265	merge.INS.1868	1	1	1	1	1
chr10	32233757	32233857	merge.INS.1869	1	1	1	1	1
chr10	32255497	32255599	merge.INS.1870	1	1	1	1	1
chr10	32446907	32446965	merge.INS.1871	1	1	1	1	1
chr10	32647472	32647528	merge.INS.1872	1	1	1	1	1
chr10	32828400	32828471	merge.INS.1873	1	1	1	1	1
chr10	32830110	32830207	merge.INS.1874	1	1	1	1	1
chr10	33095435	33095644	merge.INS.1875	0	1	1	1	1
chr10	33732999	33733536	merge.INS.1876	1	1	1	1	1
chr10	33867395	33867688	merge.INS.1877	1	1	1	1	1
chr10	33870980	33871050	merge.INS.1878	1	1	1	1	1
chr10	34605497	34606142	merge.INS.1879	1	1	1	1	0
chr10	34666798	34666850	merge.INS.1880	1	1	1	0	0
chr10	35549747	35550070	merge.INS.1881	1	1	1	1	1
chr10	35595388	35595522	merge.INS.1882	1	1	1	1	1
chr10	35610822	35612618	merge.INS.1883	1	1	1	1	1
chr10	35667225	35669241	merge.INS.1884	1	1	1	1	1
chr10	35706127	35706454	merge.INS.1885	1	1	1	1	1
chr10	35729321	35729416	merge.INS.1886	1	1	1	1	1
chr10	36131050	36131524	merge.INS.1887	1	1	1	1	1
chr10	36304681	36305024	merge.INS.1888	1	1	1	1	1
chr10	36484250	36484307	merge.INS.1889	1	1	1	1	1
chr10	36657459	36657767	merge.INS.1890	1	1	1	1	1
chr10	37068490	37068556	merge.INS.1891	1	1	1	1	1
chr10	37068573	37068672	merge.INS.1892	1	1	1	1	1
chr10	37142065	37142300	merge.INS.1893	1	0	0	1	0
chr10	37167288	37167345	merge.INS.1894	1	1	1	1	1
chr10	37401993	37402105	merge.INS.1895	1	1	1	1	1
chr10	37402113	37402147	merge.INS.1896	0	1	0	1	0
chr10	37844979	37845077	merge.INS.1897	1	1	1	1	1
chr10	38021423	38021578	merge.INS.1898	1	1	1	1	1
chr10	38087573	38087811	merge.INS.1899	1	1	1	1	1
chr10	38262265	38262332	merge.INS.1900	1	1	1	1	1
chr10	38270461	38270529	merge.INS.1901	1	1	1	1	1
chr10	38294727	38295547	merge.INS.1902	1	1	1	1	1
chr10	38509841	38509907	merge.INS.1903	1	1	1	1	1
chr10	38513348	38513551	merge.INS.1904	1	1	1	1	1
chr10	38519888	38519940	merge.INS.1905	1	1	1	1	1
chr10	38525138	38525313	merge.INS.1906	0	1	1	0	0
chr10	38526019	38527533	merge.INS.1907	1	1	1	1	1
chr10	38528704	38528807	merge.INS.1908	1	1	1	1	1
chr10	38528901	38530041	merge.INS.1909	1	1	1	1	1
chr10	38576703	38576752	merge.INS.1910	1	1	1	1	1
chr10	38580671	38580759	merge.INS.1911	1	1	1	0	1
chr10	38593984	38597807	merge.INS.1912	1	1	0	0	0
chr10	38615465	38617217	merge.INS.1913	1	1	1	1	0
chr10	38657207	38657279	merge.INS.1914	1	1	1	1	1
chr10	38784405	38784505	merge.INS.1915	1	1	1	1	1
chr10	38798838	38798868	merge.INS.1916	1	1	1	1	1
chr10	38807240	38810509	merge.INS.1917	1	1	1	1	1
chr10	38812412	38812507	merge.INS.1918	1	1	1	1	1
chr10	38822825	38822886	merge.INS.1919	1	1	1	1	1
chr10	38862130	38862182	merge.INS.1920	1	1	1	1	0
chr10	38912732	38912762	merge.INS.1921	1	1	0	1	0
chr10	38918276	38920321	merge.INS.1922	1	1	1	1	1
chr10	38930574	38930899	merge.INS.1923	1	1	1	1	0
chr10	38946437	38946716	merge.INS.1924	1	1	1	0	0
chr10	39153857	39153946	merge.INS.1925	1	1	1	1	1
chr10	39216718	39217200	merge.INS.1926	1	1	1	1	1
chr10	39229919	39230084	merge.INS.1927	1	1	1	1	1
chr10	39254774	39255032	merge.INS.1928	1	1	1	1	1
chr10	39265427	39265971	merge.INS.1929	0	1	1	1	1
chr10	39268611	39269129	merge.INS.1930	0	1	1	1	1
chr10	39363490	39363524	merge.INS.1931	0	1	1	1	0
chr10	39381663	39383786	merge.INS.1932	1	1	1	0	0
chr10	39387392	39390484	merge.INS.1933	1	1	1	0	1
chr10	39415371	39415730	merge.INS.1934	1	1	1	1	1
chr10	39427040	39427370	merge.INS.1935	1	1	1	1	1
chr10	39478716	39478888	merge.INS.1936	1	1	1	1	1
chr10	39479351	39479698	merge.INS.1937	1	1	1	1	1
chr10	39524721	39525034	merge.INS.1938	1	1	1	1	1
chr10	39559415	39560121	merge.INS.1939	1	1	1	1	1
chr10	39561149	39562728	merge.INS.1940	1	1	1	1	1
chr10	39635039	39635098	merge.INS.1941	1	1	1	1	1
chr10	40598654	40599114	merge.INS.1942	1	1	1	0	1
chr10	41577461	41577845	merge.INS.1943	1	1	1	1	0
chr10	41704797	41705518	merge.INS.1944	0	1	0	0	1
chr10	41712123	41712793	merge.INS.1945	1	1	1	1	1
chr10	41745220	41745340	merge.INS.1946	1	1	1	1	1
chr10	41766250	41766296	merge.INS.1947	1	1	1	1	1
chr10	41821631	41821999	merge.INS.1948	1	1	1	1	1
chr10	41833377	41833761	merge.INS.1949	1	1	1	1	1
chr10	41853970	41854285	merge.INS.1950	1	1	1	1	1
chr10	41856795	41857208	merge.INS.1951	1	1	1	0	1
chr10	41857922	41857977	merge.INS.1952	0	1	0	0	0
chr10	41858153	41858308	merge.INS.1953	1	1	0	1	0
chr10	41858379	41858510	merge.INS.1954	1	1	0	1	0
chr10	41858944	41858980	merge.INS.1955	1	1	1	1	1
chr10	41859200	41859279	merge.INS.1956	1	1	0	0	0
chr10	41859324	41859681	merge.INS.1957	1	1	0	1	0
chr10	41860629	41860686	merge.INS.1958	1	1	1	0	0
chr10	41861492	41861564	merge.INS.1959	1	1	1	1	0
chr10	41862616	41862674	merge.INS.1960	1	1	1	1	1
chr10	41863054	41863466	merge.INS.1961	0	1	1	1	0
chr10	41863569	41863729	merge.INS.1962	0	1	1	0	0
chr10	41863800	41863919	merge.INS.1963	0	1	1	0	0
chr10	41863995	41864420	merge.INS.1964	1	1	1	1	1
chr10	41864765	41865123	merge.INS.1965	0	1	1	0	0
chr10	41866233	41866321	merge.INS.1966	1	1	0	1	0
chr10	41866442	41866540	merge.INS.1967	0	1	1	1	1
chr10	41867153	41867338	merge.INS.1968	1	1	1	1	1
chr10	41870628	41870699	merge.INS.1969	1	1	1	1	1
chr10	41877170	41877250	merge.INS.1970	0	1	1	0	0
chr10	41878458	41878984	merge.INS.1971	0	1	1	1	1
chr10	41879005	41879197	merge.INS.1972	1	1	0	0	0
chr10	41879290	41879893	merge.INS.1973	1	1	1	1	1
chr10	41879914	41879948	merge.INS.1974	1	1	1	1	0
chr10	41879958	41880088	merge.INS.1975	1	1	1	0	1
chr10	41880280	41880332	merge.INS.1976	1	1	1	0	0
chr10	41880360	41880427	merge.INS.1977	0	1	0	1	0
chr10	41880483	41880517	merge.INS.1978	1	1	1	0	0
chr10	41880882	41880966	merge.INS.1979	1	1	1	1	0
chr10	41880982	41881062	merge.INS.1980	1	1	1	1	1
chr10	41881069	41881167	merge.INS.1981	1	1	1	1	1
chr10	41881437	41884316	merge.INS.1982	1	1	1	1	1
chr10	41884406	41884436	merge.INS.1983	1	1	1	1	0
chr10	41884675	41884752	merge.INS.1984	1	1	0	1	0
chr10	41885019	41885124	merge.INS.1985	1	1	1	1	1
chr10	41885441	41886718	merge.INS.1986	1	1	1	1	1
chr10	41888393	41888971	merge.INS.1987	1	1	1	1	1
chr10	41889976	41890013	merge.INS.1988	1	1	1	1	1
chr10	41890014	41890136	merge.INS.1989	1	1	1	1	0
chr10	41890599	41890832	merge.INS.1990	1	1	1	1	1
chr10	41890842	41890906	merge.INS.1991	0	1	1	0	1
chr10	41891072	41891232	merge.INS.1992	1	1	0	0	0
chr10	41891245	41891483	merge.INS.1993	0	1	1	0	0
chr10	41892027	41892715	merge.INS.1994	1	1	1	1	0
chr10	41892776	41892913	merge.INS.1995	1	1	0	0	0
chr10	41893028	41893120	merge.INS.1996	1	1	1	1	1
chr10	41893584	41893665	merge.INS.1997	1	1	1	1	1
[truncated: 16,674 more rows]

## Sheet: Deletion
Table S6. Summary of deletions detected in K562 scNanoCT&ATAC-seq data.
				Supported by individual ATAC-histone dual-modal data
Chrom	Start	End	SVID	H3K27ac	H3K27me3	H3K4me3	H3K9me3	Supported by ONT WGS data
chr1	136229	136310	merge.DEL.1	1	1	1	1	0
chr1	432591	432825	merge.DEL.2	1	1	1	1	0
chr1	434132	434410	merge.DEL.3	1	1	1	1	0
chr1	434679	434964	merge.DEL.4	1	1	1	1	0
chr1	598531	598662	merge.DEL.5	0	1	0	1	0
chr1	609870	610620	merge.DEL.6	1	1	1	1	0
chr1	669343	669474	merge.DEL.7	1	1	1	1	0
chr1	714325	714426	merge.DEL.8	1	1	1	1	1
chr1	820836	820871	merge.DEL.9	1	0	1	1	0
chr1	820965	821019	merge.DEL.10	1	1	1	1	0
chr1	822404	822520	merge.DEL.11	1	1	1	1	1
chr1	839451	839575	merge.DEL.12	1	1	1	1	1
chr1	853416	853770	merge.DEL.13	1	1	1	1	1
chr1	866571	866681	merge.DEL.14	1	0	1	1	0
chr1	876086	876211	merge.DEL.15	1	0	1	1	0
chr1	882639	882732	merge.DEL.16	1	1	1	1	1
chr1	890130	895315	merge.DEL.17	1	1	1	1	1
chr1	908919	909782	merge.DEL.18	1	1	1	1	1
chr1	933964	934955	merge.DEL.19	1	1	1	1	1
chr1	936235	936436	merge.DEL.20	1	1	1	1	1
chr1	964601	964858	merge.DEL.21	1	1	1	1	1
chr1	976716	978059	merge.DEL.22	1	1	1	1	1
chr1	986946	987507	merge.DEL.23	1	1	1	1	0
chr1	987535	991775	merge.DEL.24	0	0	1	1	0
chr1	996380	996479	merge.DEL.25	1	1	1	1	0
chr1	996484	996607	merge.DEL.26	1	1	0	1	0
chr1	996613	996857	merge.DEL.27	1	1	1	1	0
chr1	1008009	1016013	merge.DEL.28	1	1	1	0	0
chr1	1030867	1030969	merge.DEL.29	1	1	1	1	1
chr1	1041713	1041859	merge.DEL.30	1	1	1	1	1
chr1	1062053	1062097	merge.DEL.31	1	1	1	1	0
chr1	1064996	1065185	merge.DEL.32	1	1	1	1	1
chr1	1076028	1076088	merge.DEL.33	1	1	1	1	0
chr1	1076122	1078380	merge.DEL.34	1	1	1	1	1
chr1	1078409	1078512	merge.DEL.35	1	0	1	1	0
chr1	1078557	1079424	merge.DEL.36	1	1	1	1	0
chr1	1080650	1080996	merge.DEL.37	1	1	1	1	1
chr1	1139069	1140314	merge.DEL.38	1	1	1	1	1
chr1	1140473	1140664	merge.DEL.39	1	1	1	1	0
chr1	1157296	1157346	merge.DEL.40	1	1	1	1	1
chr1	1168008	1168131	merge.DEL.41	1	1	1	1	1
chr1	1186298	1190929	merge.DEL.42	1	1	1	1	0
chr1	1201893	1202587	merge.DEL.43	1	1	1	1	0
chr1	1248490	1248731	merge.DEL.44	1	1	1	1	0
chr1	1248812	1248915	merge.DEL.45	1	0	1	1	0
chr1	1276676	1280475	merge.DEL.46	1	1	1	1	0
chr1	1288205	1290214	merge.DEL.47	1	1	1	1	1
chr1	1315728	1315800	merge.DEL.48	1	1	1	1	1
chr1	1349970	1351446	merge.DEL.49	1	1	1	1	1
chr1	1362662	1372728	merge.DEL.50	1	1	1	1	1
chr1	1379875	1397775	merge.DEL.51	1	1	1	1	0
chr1	1403290	1404377	merge.DEL.52	1	1	1	1	0
chr1	1443007	1451599	merge.DEL.53	1	1	1	1	1
chr1	1464584	1465514	merge.DEL.54	1	1	1	1	0
chr1	1473785	1493604	merge.DEL.55	1	0	1	1	0
chr1	1497595	1507084	merge.DEL.56	1	1	1	1	0
chr1	1525542	1531659	merge.DEL.57	1	0	1	1	0
chr1	1570976	1573292	merge.DEL.58	1	1	1	1	0
chr1	1579506	1593495	merge.DEL.59	1	1	1	1	0
chr1	1605450	1605619	merge.DEL.60	1	1	1	1	1
chr1	1605743	1606080	merge.DEL.61	1	1	1	1	0
chr1	1607426	1613443	merge.DEL.62	1	1	1	1	0
chr1	1629836	1629884	merge.DEL.63	1	1	0	1	0
chr1	1648912	1652978	merge.DEL.64	1	1	1	1	1
chr1	1659728	1688621	merge.DEL.65	1	1	1	1	1
chr1	1693925	1695630	merge.DEL.66	1	1	1	1	0
chr1	1717594	1717714	merge.DEL.67	1	1	1	1	1
chr1	1718873	1720641	merge.DEL.68	1	0	1	0	0
chr1	1725161	1736017	merge.DEL.69	1	0	1	1	0
chr1	1736819	1742992	merge.DEL.70	1	0	1	0	0
chr1	1761169	1767093	merge.DEL.71	1	0	1	1	0
chr1	1771934	1773492	merge.DEL.72	1	1	1	0	0
chr1	1825603	1845312	merge.DEL.73	1	1	0	1	0
chr1	1850039	1852311	merge.DEL.74	1	1	1	1	0
chr1	1882366	1886993	merge.DEL.75	1	1	1	1	0
chr1	1897181	1905952	merge.DEL.76	1	1	1	1	0
chr1	1909658	1913705	merge.DEL.77	1	1	0	1	0
chr1	1931947	1936481	merge.DEL.78	1	1	1	1	1
chr1	1937822	1937879	merge.DEL.79	1	1	1	1	1
chr1	1968886	1969016	merge.DEL.80	1	1	1	1	1
chr1	1978994	1979263	merge.DEL.81	1	1	1	1	1
chr1	1979278	1979369	merge.DEL.82	1	1	1	1	0
chr1	1979409	1979940	merge.DEL.83	1	1	1	1	1
chr1	1980052	1980492	merge.DEL.84	1	1	1	1	1
chr1	1981436	1981661	merge.DEL.85	1	1	1	1	0
chr1	1981671	1981826	merge.DEL.86	1	0	1	1	0
chr1	1981874	1982141	merge.DEL.87	1	1	1	1	0
chr1	1991204	2000180	merge.DEL.88	1	1	1	1	0
chr1	2031612	2031689	merge.DEL.89	1	1	1	1	1
chr1	2106458	2106872	merge.DEL.90	1	1	1	1	1
chr1	2110018	2110308	merge.DEL.91	1	1	1	1	1
chr1	2121497	2121669	merge.DEL.92	1	1	1	1	1
chr1	2121699	2124415	merge.DEL.93	1	1	1	1	1
chr1	2142268	2142528	merge.DEL.94	1	1	1	1	1
chr1	2147810	2147967	merge.DEL.95	0	1	0	1	0
chr1	2189136	2192825	merge.DEL.96	1	1	1	0	0
chr1	2206847	2226233	merge.DEL.97	1	1	1	1	0
chr1	2261853	2262118	merge.DEL.98	1	1	1	1	1
chr1	2280629	2282576	merge.DEL.99	1	1	1	1	1
chr1	2309654	2309781	merge.DEL.100	1	1	1	1	1
chr1	2436221	2436591	merge.DEL.101	1	1	1	1	1
chr1	2459396	2459688	merge.DEL.102	1	1	1	1	1
chr1	2483837	2483988	merge.DEL.103	1	1	1	1	0
chr1	2522877	2522909	merge.DEL.104	1	1	0	1	0
chr1	2651333	2651471	merge.DEL.105	1	1	1	1	0
chr1	2651813	2652266	merge.DEL.106	1	1	1	1	0
chr1	2652274	2699479	merge.DEL.107	1	1	1	1	1
chr1	2699494	2699696	merge.DEL.108	1	1	1	1	0
chr1	2699770	2700293	merge.DEL.109	1	1	1	1	1
chr1	2700459	2700966	merge.DEL.110	1	1	1	1	1
chr1	2746713	2746841	merge.DEL.111	1	1	0	0	0
chr1	2746867	2747134	merge.DEL.112	1	1	1	1	0
chr1	2747180	2748614	merge.DEL.113	1	1	1	1	0
chr1	2748623	2750654	merge.DEL.114	1	1	1	1	1
chr1	2750666	2760488	merge.DEL.115	1	1	1	1	1
chr1	2760565	2760609	merge.DEL.116	1	1	1	1	0
chr1	2760690	2761225	merge.DEL.117	1	1	0	0	0
chr1	2761419	2762086	merge.DEL.118	1	1	0	0	0
chr1	2762772	2763304	merge.DEL.119	0	1	0	0	0
chr1	2798173	2798282	merge.DEL.120	1	1	1	1	1
chr1	2852054	2852930	merge.DEL.121	1	1	1	1	1
chr1	2859217	2859323	merge.DEL.122	1	1	0	1	0
chr1	2949574	2949950	merge.DEL.123	1	1	1	1	1
chr1	2959996	2960170	merge.DEL.124	1	1	1	1	1
chr1	2977166	2977370	merge.DEL.125	1	1	1	1	0
chr1	2977411	2977517	merge.DEL.126	0	1	1	1	0
chr1	2977602	2977748	merge.DEL.127	0	0	1	1	0
chr1	3165379	3165929	merge.DEL.128	1	1	1	1	1
chr1	3167808	3167978	merge.DEL.129	1	0	0	1	0
chr1	3176283	3176483	merge.DEL.130	1	1	1	1	0
chr1	3287746	3287828	merge.DEL.131	0	0	0	1	0
chr1	3299495	3299609	merge.DEL.132	1	1	1	1	1
chr1	3300348	3300457	merge.DEL.133	1	1	1	1	1
chr1	3325988	3326122	merge.DEL.134	1	1	1	1	1
chr1	3345726	3345843	merge.DEL.135	1	1	1	1	1
chr1	3379615	3379772	merge.DEL.136	1	1	1	1	0
chr1	3403008	3403108	merge.DEL.137	1	1	1	1	1
chr1	3433482	3433650	merge.DEL.138	1	1	1	1	1
chr1	3443224	3443357	merge.DEL.139	1	1	1	1	1
chr1	3583299	3583905	merge.DEL.140	1	1	1	1	1
chr1	3587877	3588354	merge.DEL.141	1	1	1	1	0
chr1	3591747	3591920	merge.DEL.142	1	1	1	1	1
chr1	3640463	3640604	merge.DEL.143	1	1	1	1	1
chr1	3643572	3644439	merge.DEL.144	1	1	1	1	1
chr1	3674985	3675354	merge.DEL.145	1	1	1	1	1
chr1	3681848	3681951	merge.DEL.146	1	1	1	1	1
chr1	3693745	3693856	merge.DEL.147	1	1	1	1	0
chr1	3693881	3694365	merge.DEL.148	1	1	1	1	0
chr1	3694509	3694884	merge.DEL.149	1	1	1	1	0
chr1	3739279	3739506	merge.DEL.150	1	1	1	1	1
chr1	3803395	3809425	merge.DEL.151	1	1	1	0	0
chr1	3830512	3836050	merge.DEL.152	1	1	1	1	1
chr1	3891897	3892687	merge.DEL.153	1	1	1	1	1
chr1	3908378	3908478	merge.DEL.154	0	1	1	1	0
chr1	3929689	3930262	merge.DEL.155	1	1	1	1	0
chr1	3986089	3986158	merge.DEL.156	1	1	1	1	1
chr1	3999761	3999905	merge.DEL.157	1	1	1	1	1
chr1	4064927	4065605	merge.DEL.158	1	1	1	1	1
chr1	4065740	4066380	merge.DEL.159	1	1	1	1	1
chr1	4077240	4078088	merge.DEL.160	1	1	1	1	0
chr1	4078357	4078628	merge.DEL.161	1	1	1	1	0
chr1	4123929	4129308	merge.DEL.162	0	1	1	1	0
chr1	4135991	4136656	merge.DEL.163	1	1	1	1	0
chr1	4136741	4136856	merge.DEL.164	0	1	1	1	0
chr1	4144573	4144658	merge.DEL.165	1	1	1	1	0
chr1	4178245	4178330	merge.DEL.166	1	1	1	1	1
chr1	4318347	4318461	merge.DEL.167	1	1	1	1	1
chr1	4332403	4333345	merge.DEL.168	1	1	1	1	1
chr1	4420271	4420374	merge.DEL.169	1	1	1	1	1
chr1	4508576	4508618	merge.DEL.170	1	1	1	1	0
chr1	4632575	4632652	merge.DEL.171	0	1	1	1	0
chr1	4632722	4632798	merge.DEL.172	0	1	1	1	0
chr1	4633218	4633342	merge.DEL.173	0	1	1	1	0
chr1	4633358	4633434	merge.DEL.174	1	1	1	1	0
chr1	4666508	4666610	merge.DEL.175	1	1	1	1	0
chr1	4939498	4939541	merge.DEL.176	1	1	1	1	0
chr1	4943721	4943800	merge.DEL.177	0	1	1	0	0
chr1	5137035	5137150	merge.DEL.178	0	1	1	1	0
chr1	5246146	5246244	merge.DEL.179	1	1	1	1	1
chr1	5246604	5246710	merge.DEL.180	1	1	1	1	1
chr1	5303988	5304155	merge.DEL.181	1	1	1	1	1
chr1	5414116	5414253	merge.DEL.182	1	1	1	1	1
chr1	5655858	5655964	merge.DEL.183	1	1	1	1	1
chr1	5736365	5736417	merge.DEL.184	1	1	1	1	1
chr1	5744077	5744322	merge.DEL.185	1	1	1	1	1
chr1	5884441	5884757	merge.DEL.186	1	1	1	1	1
chr1	6004950	6005431	merge.DEL.187	1	1	1	1	0
chr1	6005892	6006760	merge.DEL.188	1	1	1	1	1
chr1	6012410	6012534	merge.DEL.189	1	1	1	1	0
chr1	6114268	6123081	merge.DEL.190	0	1	0	1	0
chr1	6160061	6160468	merge.DEL.191	1	1	1	1	1
chr1	6187046	6195447	merge.DEL.192	1	1	1	1	0
chr1	6202382	6208606	merge.DEL.193	1	1	1	1	0
chr1	6215785	6237556	merge.DEL.194	1	1	1	1	0
chr1	6306183	6306231	merge.DEL.195	1	1	1	1	0
chr1	6332829	6341753	merge.DEL.196	1	0	0	1	0
chr1	6362777	6377093	merge.DEL.197	1	1	1	1	0
chr1	6378935	6391208	merge.DEL.198	1	1	1	1	0
chr1	6398527	6412547	merge.DEL.199	1	1	1	1	0
chr1	6520900	6526975	merge.DEL.200	1	0	0	0	0
chr1	6530284	6553672	merge.DEL.201	1	0	1	1	0
chr1	6556107	6560728	merge.DEL.202	1	1	1	0	0
chr1	6571609	6577802	merge.DEL.203	1	1	1	1	0
chr1	6604761	6612401	merge.DEL.204	1	1	1	1	0
chr1	6616237	6624570	merge.DEL.205	1	1	1	1	0
chr1	6692853	6698665	merge.DEL.206	1	1	1	1	0
chr1	6703713	6728564	merge.DEL.207	1	1	1	1	0
chr1	6777220	6782828	merge.DEL.208	1	0	1	1	0
chr1	7114663	7114841	merge.DEL.209	1	1	1	1	1
chr1	7115444	7115655	merge.DEL.210	1	1	1	1	1
chr1	7548426	7548534	merge.DEL.211	1	1	1	1	1
chr1	7548645	7548909	merge.DEL.212	1	1	1	1	1
chr1	7829911	7830045	merge.DEL.213	1	1	1	1	1
chr1	7842508	7855339	merge.DEL.214	1	0	1	1	0
chr1	7862980	7863116	merge.DEL.215	1	1	1	1	1
chr1	7864879	7865519	merge.DEL.216	1	1	1	1	1
chr1	7956935	7958904	merge.DEL.217	1	1	1	1	0
chr1	7963355	7977009	merge.DEL.218	1	1	1	1	0
chr1	8124136	8131545	merge.DEL.219	1	1	1	1	0
chr1	8157848	8157950	merge.DEL.220	1	1	1	1	1
chr1	8163334	8172770	merge.DEL.221	1	1	1	0	0
chr1	8187282	8188204	merge.DEL.222	1	1	1	1	0
chr1	8240666	8254240	merge.DEL.223	1	1	1	1	0
chr1	8261351	8261406	merge.DEL.224	1	1	1	1	1
chr1	8375576	8375663	merge.DEL.225	0	1	1	1	1
chr1	8501524	8501584	merge.DEL.226	1	1	1	0	0
chr1	8646056	8646147	merge.DEL.227	1	1	1	1	1
chr1	8668893	8669053	merge.DEL.228	1	1	1	1	1
chr1	8822378	8837087	merge.DEL.229	1	1	0	1	0
chr1	8847020	8847218	merge.DEL.230	1	1	1	1	0
chr1	8850925	8862164	merge.DEL.231	1	1	1	1	0
chr1	8881405	8905416	merge.DEL.232	1	1	1	1	1
chr1	8932060	8941662	merge.DEL.233	1	1	0	1	0
chr1	8968072	8970613	merge.DEL.234	1	1	0	1	0
chr1	8975519	8982843	merge.DEL.235	1	1	0	1	0
chr1	8991375	9003818	merge.DEL.236	0	1	1	1	0
chr1	9072688	9084164	merge.DEL.237	0	0	1	1	0
chr1	9106921	9110324	merge.DEL.238	0	1	0	1	0
chr1	9118994	9126038	merge.DEL.239	1	1	1	0	0
chr1	9131599	9143967	merge.DEL.240	1	1	0	1	0
chr1	9164458	9173631	merge.DEL.241	1	0	0	1	0
chr1	9287833	9291535	merge.DEL.242	1	1	0	1	0
chr1	9298376	9298450	merge.DEL.243	1	1	1	1	1
chr1	9406841	9416250	merge.DEL.244	1	0	1	1	0
chr1	9424821	9427923	merge.DEL.245	1	0	1	1	0
chr1	9457966	9464856	merge.DEL.246	0	1	1	1	0
chr1	9479076	9490062	merge.DEL.247	1	1	1	1	0
chr1	9499915	9505064	merge.DEL.248	1	1	1	1	0
chr1	9507503	9516985	merge.DEL.249	0	1	1	1	0
chr1	9517021	9537623	merge.DEL.250	1	0	1	1	0
chr1	9545467	9588246	merge.DEL.251	1	1	1	1	0
chr1	9592638	9592697	merge.DEL.252	1	1	1	1	1
chr1	9599190	9599536	merge.DEL.253	1	1	1	0	0
chr1	9635035	9646965	merge.DEL.254	1	1	1	1	0
chr1	9661338	9664315	merge.DEL.255	1	1	0	1	0
chr1	9677892	9685399	merge.DEL.256	1	0	1	1	0
chr1	9725768	9743296	merge.DEL.257	1	1	1	1	0
chr1	9815870	9821448	merge.DEL.258	1	0	1	0	0
chr1	9828310	9835157	merge.DEL.259	1	1	1	1	0
chr1	9892105	9908743	merge.DEL.260	1	1	1	1	0
chr1	9913543	9941573	merge.DEL.261	1	1	1	0	0
chr1	9948899	9956692	merge.DEL.262	1	1	1	1	0
chr1	9959706	9970711	merge.DEL.263	0	1	1	1	0
chr1	9993355	10003954	merge.DEL.264	1	1	1	1	0
chr1	10008687	10020830	merge.DEL.265	1	1	1	1	0
chr1	10035250	10041792	merge.DEL.266	1	1	1	1	0
chr1	10181604	10184856	merge.DEL.267	1	0	1	1	0
chr1	10194964	10209064	merge.DEL.268	1	1	1	1	0
chr1	10215214	10224415	merge.DEL.269	1	1	1	1	0
chr1	10314171	10373213	merge.DEL.270	1	1	1	1	0
chr1	10376051	10397923	merge.DEL.271	1	1	1	1	0
chr1	10401755	10403464	merge.DEL.272	1	1	0	1	0
chr1	10444011	10454368	merge.DEL.273	1	0	1	1	0
chr1	10464995	10470807	merge.DEL.274	1	1	1	1	0
chr1	10503056	10503989	merge.DEL.275	0	1	1	0	0
chr1	10577545	10577584	merge.DEL.276	1	1	1	1	1
chr1	10662216	10662372	merge.DEL.277	1	1	1	1	1
chr1	10824627	10824693	merge.DEL.278	0	1	0	1	0
chr1	10893024	10894654	merge.DEL.279	1	1	1	1	0
chr1	10915351	10936965	merge.DEL.280	1	1	1	1	0
chr1	10983046	10983085	merge.DEL.281	1	1	1	1	1
chr1	10983106	10987516	merge.DEL.282	1	1	1	1	1
chr1	10996800	11011257	merge.DEL.283	1	1	1	1	0
chr1	11017922	11031528	merge.DEL.284	1	1	0	0	0
chr1	11063933	11082058	merge.DEL.285	1	1	1	1	0
chr1	11140105	11142722	merge.DEL.286	1	1	1	1	0
chr1	11264824	11272297	merge.DEL.287	1	1	1	1	0
chr1	11274756	11283163	merge.DEL.288	1	1	1	1	0
chr1	11314444	11317722	merge.DEL.289	1	1	1	0	0
chr1	11522619	11522739	merge.DEL.290	1	0	1	1	0
chr1	11522817	11522957	merge.DEL.291	0	1	1	1	0
chr1	11622837	11623148	merge.DEL.292	1	1	1	1	1
chr1	11665190	11672534	merge.DEL.293	1	1	1	1	0
chr1	11751717	11751867	merge.DEL.294	1	1	1	1	1
chr1	11753214	11763189	merge.DEL.295	1	1	1	1	0
chr1	11781206	11784081	merge.DEL.296	1	1	1	0	0
chr1	11910526	11921638	merge.DEL.297	1	1	1	1	0
chr1	11929479	11933618	merge.DEL.298	1	0	1	1	0
chr1	11968144	11978164	merge.DEL.299	1	1	1	1	0
chr1	11985650	11988901	merge.DEL.300	1	0	1	1	0
chr1	11989003	12015485	merge.DEL.301	1	1	1	1	0
chr1	12021288	12028166	merge.DEL.302	1	1	1	1	0
chr1	12033792	12036506	merge.DEL.303	1	1	1	1	0
chr1	12040055	12051158	merge.DEL.304	1	0	1	1	0
chr1	12066908	12074410	merge.DEL.305	1	0	1	1	0
chr1	12074523	12076378	merge.DEL.306	0	1	1	1	0
chr1	12092590	12095381	merge.DEL.307	1	1	1	1	0
chr1	12183711	12183790	merge.DEL.308	1	1	1	1	1
chr1	12209923	12218556	merge.DEL.309	1	1	1	0	0
chr1	12223300	12229106	merge.DEL.310	1	1	1	1	0
chr1	12231894	12245699	merge.DEL.311	1	1	0	1	0
chr1	12271399	12278567	merge.DEL.312	0	1	1	1	0
chr1	12512355	12527190	merge.DEL.313	1	1	1	1	0
chr1	12572256	12577790	merge.DEL.314	1	1	1	1	0
chr1	12621166	12632740	merge.DEL.315	1	1	1	1	0
chr1	12789397	12789458	merge.DEL.316	1	1	1	1	1
chr1	12801722	12801781	merge.DEL.317	1	1	1	1	1
chr1	13191006	13222395	merge.DEL.318	0	1	1	0	1
chr1	13235914	13243155	merge.DEL.319	1	1	1	1	1
chr1	13255471	13257715	merge.DEL.320	0	1	0	1	1
chr1	13328813	13329219	merge.DEL.321	1	1	1	1	1
chr1	13336653	13336688	merge.DEL.322	1	1	1	1	1
chr1	13349237	13349285	merge.DEL.323	1	1	1	1	1
chr1	13444186	13450975	merge.DEL.324	0	1	1	1	0
chr1	13481753	13481815	merge.DEL.325	0	1	0	1	1
chr1	13498525	13500171	merge.DEL.326	0	0	0	1	0
chr1	13522114	13522288	merge.DEL.327	1	1	1	1	1
chr1	13524618	13530873	merge.DEL.328	1	1	1	1	1
chr1	13567880	13568219	merge.DEL.329	1	1	1	1	1
chr1	13601966	13602058	merge.DEL.330	1	1	1	1	1
chr1	13610098	13630319	merge.DEL.331	1	1	1	1	0
chr1	13668444	13673644	merge.DEL.332	1	1	1	1	0
chr1	14109814	14113052	merge.DEL.333	1	1	1	1	1
chr1	14133378	14133434	merge.DEL.334	1	1	1	1	1
chr1	14681632	14681680	merge.DEL.335	1	1	1	1	1
chr1	14918685	14918736	merge.DEL.336	1	1	1	1	1
chr1	15001196	15006791	merge.DEL.337	1	1	1	1	0
chr1	15038788	15038906	merge.DEL.338	1	1	1	1	1
chr1	15159707	15163980	merge.DEL.339	1	0	1	1	0
chr1	15430764	15441086	merge.DEL.340	1	0	1	0	0
chr1	15547626	15556267	merge.DEL.341	1	0	1	0	0
chr1	15572254	15574635	merge.DEL.342	1	1	1	0	0
chr1	15593084	15602428	merge.DEL.343	1	0	0	1	0
chr1	15606969	15616353	merge.DEL.344	1	1	1	1	0
chr1	15682259	15706700	merge.DEL.345	1	1	1	1	0
chr1	15774143	15800065	merge.DEL.346	1	1	1	1	0
chr1	15803357	15815299	merge.DEL.347	1	1	1	1	0
chr1	15821329	15832892	merge.DEL.348	1	1	1	1	1
chr1	15836625	15846890	merge.DEL.349	1	1	1	1	0
chr1	15853713	15860147	merge.DEL.350	1	1	1	1	0
chr1	15887548	15888738	merge.DEL.351	0	1	1	0	0
chr1	15904215	15904744	merge.DEL.352	1	0	1	1	0
chr1	15927611	16004454	merge.DEL.353	1	1	1	1	0
chr1	16037989	16038064	merge.DEL.354	1	1	1	1	1
chr1	16084030	16087024	merge.DEL.355	0	0	1	1	0
chr1	16136581	16137560	merge.DEL.356	1	0	1	1	0
chr1	16154689	16163446	merge.DEL.357	1	1	1	1	0
chr1	16166159	16166266	merge.DEL.358	1	1	1	1	1
chr1	16177080	16189743	merge.DEL.359	1	1	1	1	0
chr1	16213958	16215722	merge.DEL.360	1	0	1	1	0
chr1	16222683	16229158	merge.DEL.361	1	1	0	1	0
chr1	16231129	16239249	merge.DEL.362	1	1	1	1	0
chr1	16337612	16347584	merge.DEL.363	1	0	1	1	0
chr1	16354034	16366609	merge.DEL.364	1	1	1	1	0
chr1	16371494	16375105	merge.DEL.365	0	0	1	1	0
chr1	16518613	16545266	merge.DEL.366	1	1	1	0	0
chr1	16557813	16557843	merge.DEL.367	1	1	1	1	1
chr1	16619292	16621185	merge.DEL.368	1	1	1	1	1
chr1	16622435	16641206	merge.DEL.369	1	1	1	1	0
chr1	16653957	16654052	merge.DEL.370	1	1	1	1	1
chr1	16727923	16727980	merge.DEL.371	1	1	1	1	1
chr1	16798415	16798446	merge.DEL.372	1	1	1	1	0
chr1	16910449	16911425	merge.DEL.373	1	1	1	1	0
chr1	17003914	17010333	merge.DEL.374	1	1	1	1	0
chr1	17043150	17052057	merge.DEL.375	1	1	1	1	0
chr1	17126820	17128001	merge.DEL.376	0	0	0	1	0
chr1	17241451	17241891	merge.DEL.377	1	1	1	1	1
chr1	17349678	17351202	merge.DEL.378	1	1	1	1	1
chr1	17351980	17352038	merge.DEL.379	1	1	1	1	1
chr1	17352180	17352219	merge.DEL.380	1	1	1	1	1
chr1	17358269	17358608	merge.DEL.381	1	1	1	1	1
chr1	17360830	17361165	merge.DEL.382	0	0	1	1	0
chr1	17442568	17481373	merge.DEL.383	1	1	1	1	0
chr1	17490434	17505866	merge.DEL.384	1	1	1	1	0
chr1	17519047	17519781	merge.DEL.385	1	1	0	1	0
chr1	17683124	17683444	merge.DEL.386	1	1	1	1	1
chr1	17783035	17785309	merge.DEL.387	1	0	1	1	0
chr1	18273411	18273522	merge.DEL.388	1	1	1	1	1
chr1	18330584	18330683	merge.DEL.389	1	1	1	1	1
chr1	18357417	18357488	merge.DEL.390	1	1	1	1	1
chr1	18363474	18363521	merge.DEL.391	1	1	1	1	1
chr1	18604738	18604795	merge.DEL.392	1	1	0	1	1
chr1	18604847	18605047	merge.DEL.393	1	1	1	1	1
chr1	18825250	18825818	merge.DEL.394	1	1	1	1	1
chr1	19149791	19150070	merge.DEL.395	0	1	1	1	0
chr1	19182472	19185694	merge.DEL.396	1	0	1	1	0
chr1	19214881	19217521	merge.DEL.397	1	0	1	1	0
chr1	19228858	19232074	merge.DEL.398	1	1	1	1	0
chr1	19241727	19249813	merge.DEL.399	1	1	1	1	0
chr1	19297339	19299883	merge.DEL.400	1	1	1	1	0
chr1	19318691	19320711	merge.DEL.401	1	1	0	1	0
chr1	19471578	19474286	merge.DEL.402	1	1	1	1	1
chr1	19487333	19510449	merge.DEL.403	1	1	1	1	0
chr1	19606544	19616119	merge.DEL.404	1	1	1	0	0
chr1	19628382	19628451	merge.DEL.405	1	1	1	1	1
chr1	19635538	19639969	merge.DEL.406	1	1	1	0	0
chr1	19649441	19653250	merge.DEL.407	1	1	0	1	0
chr1	19870668	19881690	merge.DEL.408	1	1	1	1	1
chr1	20069660	20069708	merge.DEL.409	1	1	1	1	1
chr1	20463543	20463596	merge.DEL.410	1	1	1	1	0
chr1	20509299	20521880	merge.DEL.411	1	1	1	1	0
chr1	20542014	20545149	merge.DEL.412	0	1	0	1	0
chr1	20577028	20581146	merge.DEL.413	1	0	0	1	0
chr1	20587111	20587172	merge.DEL.414	1	1	1	1	1
chr1	20605523	20611441	merge.DEL.415	1	1	1	1	1
chr1	20625989	20626185	merge.DEL.416	1	1	1	1	1
chr1	20671628	20695483	merge.DEL.417	1	1	1	1	0
chr1	20750321	20750369	merge.DEL.418	1	1	1	1	1
chr1	20794274	20796920	merge.DEL.419	1	0	1	0	0
chr1	20816294	20816368	merge.DEL.420	1	1	1	1	1
chr1	20943970	20944007	merge.DEL.421	1	1	1	1	1
chr1	20981485	20981763	merge.DEL.422	1	1	1	1	1
chr1	21023935	21023985	merge.DEL.423	1	1	1	1	1
chr1	21179280	21201216	merge.DEL.424	1	1	1	1	0
chr1	21202742	21215236	merge.DEL.425	1	0	1	1	0
chr1	21281858	21286872	merge.DEL.426	1	1	0	1	0
chr1	21315534	21316946	merge.DEL.427	1	1	1	1	0
chr1	21353303	21383302	merge.DEL.428	1	1	1	1	1
chr1	21388440	21388783	merge.DEL.429	1	1	1	1	1
chr1	21459925	21460202	merge.DEL.430	1	1	1	1	1
chr1	21461253	21461322	merge.DEL.431	1	1	1	1	1
chr1	21506195	21506423	merge.DEL.432	1	1	1	1	0
chr1	21521393	21527120	merge.DEL.433	1	0	1	1	0
chr1	21552029	21555709	merge.DEL.434	1	1	1	1	1
chr1	21578663	21585737	merge.DEL.435	1	0	1	1	0
chr1	21688862	21701092	merge.DEL.436	1	1	1	1	0
chr1	21762879	21813935	merge.DEL.437	1	1	1	1	0
chr1	21818003	21818216	merge.DEL.438	1	1	1	1	1
chr1	21920160	21928844	merge.DEL.439	1	0	1	0	0
chr1	21959837	21960254	merge.DEL.440	1	1	1	1	1
chr1	21960595	21979503	merge.DEL.441	1	1	1	1	0
chr1	22009564	22024867	merge.DEL.442	1	1	1	1	1
chr1	22028057	22048308	merge.DEL.443	1	1	1	1	0
chr1	22054896	22054954	merge.DEL.444	1	1	1	1	1
chr1	22311370	22311403	merge.DEL.445	1	1	1	1	1
chr1	22333591	22333911	merge.DEL.446	1	1	1	1	0
chr1	22336288	22337446	merge.DEL.447	1	1	0	1	0
chr1	22599639	22599839	merge.DEL.448	1	1	1	1	1
chr1	22695803	22700818	merge.DEL.449	1	1	1	1	0
chr1	22803614	22803672	merge.DEL.450	1	1	1	1	1
chr1	22945586	22947873	merge.DEL.451	1	0	1	1	0
chr1	23015006	23016161	merge.DEL.452	1	1	1	1	0
chr1	23017173	23017242	merge.DEL.453	1	1	1	1	1
chr1	23186099	23220139	merge.DEL.454	1	0	1	1	0
chr1	23231927	23251041	merge.DEL.455	1	1	1	1	0
chr1	23320896	23336644	merge.DEL.456	1	1	1	1	0
chr1	23345452	23359027	merge.DEL.457	1	1	1	0	0
chr1	23363362	23365673	merge.DEL.458	1	0	1	0	0
chr1	23489250	23497473	merge.DEL.459	1	0	1	1	0
chr1	23532899	23548508	merge.DEL.460	1	1	1	1	0
chr1	23625158	23637518	merge.DEL.461	1	1	1	1	0
chr1	23661521	23682039	merge.DEL.462	1	1	1	1	0
chr1	23685187	23691441	merge.DEL.463	0	1	1	1	0
chr1	23703319	23706070	merge.DEL.464	1	1	1	1	0
chr1	23721532	23741247	merge.DEL.465	1	1	1	1	0
chr1	23744666	23752684	merge.DEL.466	1	1	0	1	0
chr1	23765519	23777765	merge.DEL.467	1	1	1	1	0
chr1	23780756	23790155	merge.DEL.468	1	1	1	1	0
chr1	23814423	23815630	merge.DEL.469	1	1	1	0	0
chr1	23826404	23835682	merge.DEL.470	1	1	1	1	0
chr1	23857737	23864991	merge.DEL.471	1	1	1	1	0
chr1	23880692	23889000	merge.DEL.472	0	1	0	1	0
chr1	23891180	23898641	merge.DEL.473	1	1	1	1	0
chr1	23935778	23935879	merge.DEL.474	1	1	1	1	1
chr1	23938112	23958711	merge.DEL.475	1	1	1	1	0
chr1	23993360	23994114	merge.DEL.476	1	1	1	1	1
chr1	24015676	24015780	merge.DEL.477	1	1	1	1	1
chr1	24028680	24045603	merge.DEL.478	1	1	1	1	0
chr1	24048166	24048211	merge.DEL.479	1	1	1	1	1
chr1	24153953	24154655	merge.DEL.480	1	1	1	1	0
chr1	24162698	24162832	merge.DEL.481	1	1	1	1	1
chr1	24162857	24162901	merge.DEL.482	1	1	1	1	0
chr1	24182017	24197722	merge.DEL.483	1	1	1	1	0
chr1	24212021	24212098	merge.DEL.484	1	1	1	1	0
chr1	24345065	24345158	merge.DEL.485	1	1	0	1	0
chr1	24510918	24524008	merge.DEL.486	1	1	1	1	0
chr1	24604594	24604630	merge.DEL.487	1	0	1	1	0
chr1	24687628	24704427	merge.DEL.488	1	1	1	1	0
chr1	24710618	24712712	merge.DEL.489	1	1	0	1	0
chr1	24724043	24743187	merge.DEL.490	1	0	1	1	0
chr1	24799720	24800357	merge.DEL.491	1	1	1	1	1
chr1	24832197	24835036	merge.DEL.492	1	1	1	1	1
chr1	25113724	25136645	merge.DEL.493	1	1	1	1	0
chr1	25141384	25147003	merge.DEL.494	1	1	0	1	0
chr1	25220047	25220400	merge.DEL.495	1	0	1	1	0
chr1	25233995	25234384	merge.DEL.496	1	0	1	1	0
chr1	25248890	25253097	merge.DEL.497	1	0	1	1	0
chr1	25283064	25283171	merge.DEL.498	1	1	1	1	0
chr1	25286370	25290909	merge.DEL.499	1	1	1	1	0
chr1	25340007	25346818	merge.DEL.500	1	1	1	0	0
chr1	25380969	25387894	merge.DEL.501	1	0	1	0	0
chr1	25402316	25408071	merge.DEL.502	0	0	1	1	0
chr1	25529432	25529481	merge.DEL.503	1	1	1	1	0
chr1	25808284	25808370	merge.DEL.504	1	1	1	1	1
chr1	25864897	25872718	merge.DEL.505	1	1	1	1	0
chr1	25936352	25938201	merge.DEL.506	1	1	0	0	0
chr1	25988624	25991904	merge.DEL.507	1	1	1	0	0
chr1	26004715	26004753	merge.DEL.508	1	1	1	1	0
chr1	26077177	26077232	merge.DEL.509	1	1	1	1	1
chr1	26115744	26120930	merge.DEL.510	1	1	1	1	0
chr1	26132419	26160163	merge.DEL.511	1	1	1	1	1
chr1	26163319	26163673	merge.DEL.512	1	1	1	1	1
chr1	26172288	26176426	merge.DEL.513	1	1	1	1	0
chr1	26186668	26201912	merge.DEL.514	1	1	1	1	0
chr1	26215679	26231427	merge.DEL.515	1	1	1	1	0
chr1	26235862	26275572	merge.DEL.516	1	1	1	1	0
chr1	26282335	26282405	merge.DEL.517	1	1	1	1	0
chr1	26309177	26319263	merge.DEL.518	1	1	1	1	0
chr1	26329200	26334663	merge.DEL.519	1	1	1	1	0
chr1	26344998	26345100	merge.DEL.520	1	1	1	1	1
chr1	26380538	26388126	merge.DEL.521	1	1	1	1	0
chr1	26390818	26423871	merge.DEL.522	1	1	1	1	1
chr1	26431052	26431445	merge.DEL.523	0	1	1	1	0
chr1	26435253	26464120	merge.DEL.524	1	1	1	1	0
chr1	26478518	26478576	merge.DEL.525	1	1	1	1	1
chr1	26479736	26499900	merge.DEL.526	1	1	1	1	1
chr1	26503129	26516658	merge.DEL.527	1	1	1	1	0
chr1	26520836	26529066	merge.DEL.528	1	1	1	1	0
chr1	26535907	26541569	merge.DEL.529	1	1	1	1	0
chr1	26547988	26558036	merge.DEL.530	1	0	1	0	0
chr1	26585847	26601294	merge.DEL.531	1	1	1	1	0
chr1	26605826	26618324	merge.DEL.532	1	1	1	0	0
chr1	26622354	26637176	merge.DEL.533	1	1	1	1	0
chr1	26638829	26670225	merge.DEL.534	1	1	1	1	1
chr1	26681142	26688689	merge.DEL.535	1	1	1	1	0
chr1	26726475	26739180	merge.DEL.536	1	1	1	0	0
chr1	26803687	26822325	merge.DEL.537	1	1	1	1	1
chr1	26836817	26837737	merge.DEL.538	1	1	1	1	0
chr1	26865926	26888160	merge.DEL.539	1	1	1	1	1
chr1	26892116	26920453	merge.DEL.540	1	1	1	1	0
chr1	26952886	26966534	merge.DEL.541	1	1	1	1	0
chr1	26974380	26989564	merge.DEL.542	1	1	1	1	0
chr1	27014017	27019483	merge.DEL.543	1	1	1	0	0
chr1	27029159	27032904	merge.DEL.544	1	1	1	1	0
chr1	27052498	27063755	merge.DEL.545	1	1	1	1	0
chr1	27076677	27083078	merge.DEL.546	0	0	1	1	0
chr1	27156654	27169998	merge.DEL.547	1	1	1	1	0
chr1	27172848	27178776	merge.DEL.548	1	1	1	0	0
chr1	27184106	27189518	merge.DEL.549	1	1	1	0	0
chr1	27231653	27232124	merge.DEL.550	1	1	1	1	0
chr1	27232323	27232917	merge.DEL.551	1	1	1	1	0
chr1	27237043	27243481	merge.DEL.552	1	1	1	1	0
chr1	27303064	27321747	merge.DEL.553	1	1	0	1	0
chr1	27368134	27372903	merge.DEL.554	1	1	1	1	0
chr1	27386065	27389657	merge.DEL.555	1	1	1	1	0
chr1	27456062	27472350	merge.DEL.556	0	0	1	1	0
chr1	27484706	27485803	merge.DEL.557	0	1	1	1	0
chr1	27487512	27487645	merge.DEL.558	1	1	1	1	1
chr1	27490901	27497961	merge.DEL.559	1	1	1	1	0
chr1	27608842	27609015	merge.DEL.560	1	1	1	1	1
chr1	27657350	27658500	merge.DEL.561	1	1	1	1	0
chr1	27668970	27669079	merge.DEL.562	1	1	1	1	1
chr1	27844839	27848144	merge.DEL.563	1	0	1	1	0
chr1	27853410	27854341	merge.DEL.564	1	1	1	1	1
chr1	27861419	27872111	merge.DEL.565	1	1	1	1	0
chr1	27877624	27877888	merge.DEL.566	1	1	1	1	1
chr1	27900543	27912105	merge.DEL.567	1	1	1	1	0
chr1	27915927	27922983	merge.DEL.568	1	1	1	1	1
chr1	27925834	27931162	merge.DEL.569	1	1	1	1	0
chr1	28090037	28092118	merge.DEL.570	0	1	1	1	0
chr1	28165286	28172318	merge.DEL.571	1	1	1	1	0
chr1	28217376	28246114	merge.DEL.572	1	1	1	1	0
chr1	28250371	28257171	merge.DEL.573	1	1	1	1	0
chr1	28302287	28327893	merge.DEL.574	1	1	1	1	0
chr1	28331082	28351682	merge.DEL.575	1	1	1	1	0
chr1	28352246	28368132	merge.DEL.576	1	1	1	1	0
chr1	28370854	28390766	merge.DEL.577	1	1	1	1	0
chr1	28395209	28411010	merge.DEL.578	0	0	1	1	0
chr1	28420025	28434572	merge.DEL.579	1	1	1	1	0
chr1	28442410	28468600	merge.DEL.580	1	1	1	1	0
chr1	28488226	28499525	merge.DEL.581	1	1	1	1	0
chr1	28519826	28539284	merge.DEL.582	1	1	1	1	1
chr1	28544330	28551504	merge.DEL.583	1	1	0	1	0
chr1	28554218	28579389	merge.DEL.584	1	1	1	1	0
chr1	28582809	28643791	merge.DEL.585	1	1	1	1	0
chr1	28645657	28647881	merge.DEL.586	1	0	1	1	0
chr1	28650378	28668066	merge.DEL.587	1	1	1	1	0
chr1	28670629	28680045	merge.DEL.588	1	1	0	1	0
chr1	28686616	28713052	merge.DEL.589	1	1	1	1	0
chr1	28717493	28733268	merge.DEL.590	1	1	1	1	0
chr1	28741474	28751152	merge.DEL.591	1	0	1	1	0
chr1	28847326	28854878	merge.DEL.592	1	1	1	1	0
chr1	28871614	28878233	merge.DEL.593	1	0	1	1	0
chr1	28879271	28880983	merge.DEL.594	1	1	1	0	0
chr1	28900328	28913206	merge.DEL.595	1	1	1	1	0
chr1	28923048	28926074	merge.DEL.596	1	1	1	1	0
chr1	28964178	28971397	merge.DEL.597	1	1	1	1	0
chr1	29053880	29067551	merge.DEL.598	0	1	1	0	0
chr1	29126611	29137150	merge.DEL.599	1	1	1	1	0
chr1	29137886	29141598	merge.DEL.600	1	1	1	1	0
chr1	29158632	29178636	merge.DEL.601	1	1	1	1	0
chr1	29182817	29185529	merge.DEL.602	1	0	1	1	0
chr1	29727417	29727576	merge.DEL.603	0	1	0	1	1
chr1	29825299	29825379	merge.DEL.604	1	1	1	1	1
chr1	29935667	29935715	merge.DEL.605	1	1	1	1	1
chr1	30258873	30258940	merge.DEL.606	1	1	1	1	1
chr1	30265769	30267094	merge.DEL.607	1	1	1	1	1
chr1	30375729	30375848	merge.DEL.608	1	1	1	1	1
chr1	30655195	30655416	merge.DEL.609	0	1	1	1	0
chr1	30894610	30894719	merge.DEL.610	1	1	1	1	1
chr1	30916200	30918676	merge.DEL.611	1	1	0	1	0
chr1	30919909	30928171	merge.DEL.612	1	0	0	1	0
chr1	30972260	30972359	merge.DEL.613	1	1	1	1	1
chr1	31044141	31061356	merge.DEL.614	1	1	1	1	0
chr1	31067347	31074204	merge.DEL.615	1	1	1	0	0
chr1	31074486	31090146	merge.DEL.616	1	1	1	1	1
chr1	31099322	31110242	merge.DEL.617	1	1	1	0	0
chr1	31113059	31119401	merge.DEL.618	1	1	1	0	0
chr1	31138493	31154189	merge.DEL.619	1	1	1	1	0
chr1	31156252	31166976	merge.DEL.620	1	1	1	1	0
chr1	31171459	31173786	merge.DEL.621	1	1	1	1	0
chr1	31193336	31206110	merge.DEL.622	1	1	1	1	0
chr1	31209123	31212465	merge.DEL.623	1	0	1	1	0
chr1	31251408	31254609	merge.DEL.624	1	1	1	0	0
chr1	31287970	31294147	merge.DEL.625	0	1	0	1	0
chr1	31403958	31416922	merge.DEL.626	1	0	1	1	0
chr1	31431859	31432180	merge.DEL.627	1	1	1	1	0
chr1	31580178	31580238	merge.DEL.628	1	0	1	1	0
chr1	31595216	31599512	merge.DEL.629	1	1	1	1	1
chr1	31884337	31888349	merge.DEL.630	1	1	1	0	0
chr1	31908113	31908186	merge.DEL.631	1	1	1	1	1
chr1	31941090	31941700	merge.DEL.632	1	1	1	1	0
chr1	31948116	31950608	merge.DEL.633	1	1	0	0	0
chr1	31954290	31957514	merge.DEL.634	1	1	1	0	0
chr1	31965894	31967974	merge.DEL.635	1	1	1	0	0
chr1	32008290	32012585	merge.DEL.636	1	1	1	1	0
chr1	32051202	32103762	merge.DEL.637	1	1	1	1	0
chr1	32109274	32110835	merge.DEL.638	1	1	1	1	1
chr1	32112718	32132812	merge.DEL.639	1	1	1	1	0
chr1	32208340	32249370	merge.DEL.640	1	1	1	1	0
chr1	32261751	32271446	merge.DEL.641	1	1	1	1	0
chr1	32280718	32290382	merge.DEL.642	1	1	0	1	0
chr1	32340620	32350594	merge.DEL.643	1	1	1	1	0
chr1	32368803	32371422	merge.DEL.644	1	1	0	1	0
chr1	32498438	32539973	merge.DEL.645	1	1	1	1	0
chr1	32542478	32567881	merge.DEL.646	1	1	1	1	0
chr1	32608350	32646316	merge.DEL.647	1	1	1	1	0
chr1	32673737	32679095	merge.DEL.648	1	1	1	1	0
chr1	32687276	32694670	merge.DEL.649	1	1	1	1	0
chr1	32696489	32701171	merge.DEL.650	1	1	1	1	0
chr1	32704692	32712073	merge.DEL.651	1	1	1	1	0
chr1	32715518	32735555	merge.DEL.652	1	1	1	1	0
chr1	32735648	32738646	merge.DEL.653	1	1	1	0	0
chr1	32745584	32753512	merge.DEL.654	1	1	0	1	0
chr1	32795341	32808501	merge.DEL.655	1	1	0	0	0
chr1	32833473	32846101	merge.DEL.656	1	1	1	0	0
chr1	32942044	32956096	merge.DEL.657	1	1	1	1	0
chr1	32967525	32977230	merge.DEL.658	1	1	1	1	1
chr1	32987931	32988311	merge.DEL.659	1	1	1	1	0
chr1	32994637	33016994	merge.DEL.660	1	1	1	1	0
chr1	33037834	33042505	merge.DEL.661	1	1	1	1	0
chr1	33052504	33052602	merge.DEL.662	1	1	1	1	0
chr1	33057740	33062269	merge.DEL.663	1	1	1	1	0
chr1	33458014	33465948	merge.DEL.664	1	1	1	1	0
chr1	33989009	33989075	merge.DEL.665	1	1	1	1	1
chr1	34102573	34102699	merge.DEL.666	1	1	1	1	1
chr1	34777605	34777719	merge.DEL.667	1	1	1	1	1
chr1	34802222	34802451	merge.DEL.668	1	1	1	1	1
chr1	34833324	34838875	merge.DEL.669	1	1	0	1	0
chr1	34989640	34991676	merge.DEL.670	1	1	1	1	0
chr1	35021399	35027510	merge.DEL.671	1	1	1	1	0
chr1	35116710	35117599	merge.DEL.672	1	1	0	1	0
chr1	35121511	35129050	merge.DEL.673	1	0	1	0	0
chr1	35154150	35157546	merge.DEL.674	1	1	0	1	0
chr1	35161516	35161854	merge.DEL.675	1	1	1	1	1
chr1	35162817	35172922	merge.DEL.676	1	1	1	1	0
chr1	35194213	35266106	merge.DEL.677	1	1	1	1	0
chr1	35313141	35322881	merge.DEL.678	1	0	1	1	0
chr1	35576922	35577054	merge.DEL.679	1	1	1	1	1
chr1	35578440	35587379	merge.DEL.680	1	0	1	1	0
chr1	35676439	35682524	merge.DEL.681	1	0	0	1	0
chr1	35716735	35731231	merge.DEL.682	1	1	1	0	0
chr1	35775754	35787399	merge.DEL.683	1	1	1	1	0
chr1	35792047	35807530	merge.DEL.684	1	1	1	1	0
chr1	35859665	35880940	merge.DEL.685	1	1	1	1	0
chr1	35903103	35913272	merge.DEL.686	1	1	0	1	0
chr1	35996669	36003494	merge.DEL.687	1	1	1	0	0
chr1	36066475	36076689	merge.DEL.688	0	1	1	1	0
chr1	36078129	36085643	merge.DEL.689	1	1	1	1	0
chr1	36101781	36114085	merge.DEL.690	1	1	1	1	0
chr1	36133206	36148583	merge.DEL.691	1	1	1	1	0
chr1	36181654	36196488	merge.DEL.692	1	1	1	1	0
chr1	36210389	36223153	merge.DEL.693	1	1	1	1	1
chr1	36230563	36277596	merge.DEL.694	1	1	1	1	1
chr1	36283612	36283723	merge.DEL.695	1	1	1	1	1
chr1	36308719	36316804	merge.DEL.696	1	1	1	1	0
chr1	36375401	36384327	merge.DEL.697	1	1	1	1	0
chr1	36399783	36416560	merge.DEL.698	1	1	1	1	1
chr1	36424204	36442242	merge.DEL.699	1	1	1	1	0
chr1	36506100	36513403	merge.DEL.700	1	1	1	1	0
chr1	36544026	36544364	merge.DEL.701	1	1	1	1	1
chr1	36653334	36663370	merge.DEL.702	1	0	0	1	0
chr1	36740612	36740763	merge.DEL.703	1	1	1	1	1
chr1	36957521	36957998	merge.DEL.704	0	1	1	1	0
chr1	36958345	36960188	merge.DEL.705	1	1	1	1	1
chr1	37288393	37288448	merge.DEL.706	1	1	1	1	1
chr1	37350875	37351124	merge.DEL.707	1	1	1	1	1
chr1	37436663	37445918	merge.DEL.708	0	1	0	1	0
chr1	37458148	37465580	merge.DEL.709	1	1	1	1	0
chr1	37490756	37495257	merge.DEL.710	1	0	1	1	0
chr1	37516238	37530654	merge.DEL.711	1	1	1	1	0
chr1	37534236	37535935	merge.DEL.712	1	0	1	1	0
chr1	37548046	37548757	merge.DEL.713	1	1	1	0	0
chr1	37597466	37602556	merge.DEL.714	1	0	1	1	0
chr1	37736450	37744486	merge.DEL.715	1	1	1	1	1
chr1	37748092	37750939	merge.DEL.716	0	0	1	1	0
chr1	37751832	37754871	merge.DEL.717	1	1	1	1	1
chr1	37797595	37798841	merge.DEL.718	1	1	1	1	0
chr1	37849165	37856701	merge.DEL.719	1	1	1	1	0
chr1	37863396	37872303	merge.DEL.720	1	1	1	1	0
chr1	37874753	37880758	merge.DEL.721	1	0	1	1	0
chr1	37896950	37897034	merge.DEL.722	1	1	1	1	1
chr1	37897895	37917777	merge.DEL.723	1	1	1	1	0
chr1	37919755	37929200	merge.DEL.724	1	1	1	1	0
chr1	37932657	37942371	merge.DEL.725	1	1	1	1	0
chr1	37963573	37967655	merge.DEL.726	1	1	1	1	0
chr1	37976078	37987378	merge.DEL.727	1	1	1	1	0
chr1	37992597	37994764	merge.DEL.728	0	1	0	1	0
chr1	38026646	38033598	merge.DEL.729	1	1	1	1	0
chr1	38562613	38562665	merge.DEL.730	0	1	1	1	1
chr1	38858720	38870537	merge.DEL.731	1	1	1	1	0
chr1	38876792	38889384	merge.DEL.732	1	1	1	1	0
chr1	38897230	38914315	merge.DEL.733	1	1	1	1	0
chr1	38949736	38968573	merge.DEL.734	1	1	1	1	0
chr1	38978878	38980655	merge.DEL.735	1	1	0	1	0
chr1	38981512	38985006	merge.DEL.736	1	1	1	1	0
chr1	39024900	39024941	merge.DEL.737	1	1	1	1	1
chr1	39027365	39080037	merge.DEL.738	1	1	1	1	0
chr1	39093051	39112365	merge.DEL.739	1	1	1	1	0
chr1	39161595	39170051	merge.DEL.740	1	1	1	1	0
chr1	39182172	39203450	merge.DEL.741	1	1	1	1	0
chr1	39207493	39213550	merge.DEL.742	1	1	1	1	0
chr1	39234801	39234880	merge.DEL.743	1	1	1	1	1
chr1	39286054	39291234	merge.DEL.744	1	0	1	1	0
chr1	39364746	39376995	merge.DEL.745	1	1	1	1	0
chr1	39377747	39389646	merge.DEL.746	1	1	1	1	0
chr1	39397335	39406512	merge.DEL.747	1	0	1	0	0
chr1	39413342	39413740	merge.DEL.748	1	1	1	1	1
chr1	39556466	39568271	merge.DEL.749	1	0	0	1	0
chr1	39577420	39588083	merge.DEL.750	1	1	1	1	0
chr1	39598593	39605569	merge.DEL.751	1	1	1	1	0
chr1	39792283	39796271	merge.DEL.752	1	1	0	1	0
chr1	39803587	39815370	merge.DEL.753	1	1	1	1	0
chr1	39910825	39945382	merge.DEL.754	1	1	1	1	0
chr1	39970136	39973315	merge.DEL.755	1	1	1	1	0
chr1	39974556	39979306	merge.DEL.756	1	1	1	0	0
chr1	39983394	40001194	merge.DEL.757	1	1	1	1	0
chr1	40006922	40010133	merge.DEL.758	1	1	1	1	0
chr1	40016585	40034378	merge.DEL.759	1	1	1	1	0
chr1	40037505	40038627	merge.DEL.760	1	1	1	1	0
chr1	40045514	40055801	merge.DEL.761	1	1	1	1	0
chr1	40098228	40116349	merge.DEL.762	1	1	1	1	0
chr1	40200868	40200924	merge.DEL.763	1	1	1	0	0
chr1	40225927	40232193	merge.DEL.764	1	1	0	1	0
chr1	40246259	40254399	merge.DEL.765	1	0	1	1	0
chr1	40322524	40328203	merge.DEL.766	1	1	1	0	0
chr1	40332059	40332268	merge.DEL.767	1	1	1	1	0
chr1	40332652	40332910	merge.DEL.768	1	1	1	1	0
chr1	40496669	40523550	merge.DEL.769	1	1	1	1	1
chr1	40601092	40605546	merge.DEL.770	1	1	1	1	0
chr1	40670822	40689567	merge.DEL.771	1	1	1	1	1
chr1	40695495	40702590	merge.DEL.772	1	1	1	1	0
chr1	40809804	40815251	merge.DEL.773	1	1	1	1	0
chr1	40949916	40956152	merge.DEL.774	1	1	1	1	0
chr1	41005168	41016989	merge.DEL.775	1	0	1	1	0
chr1	41274011	41274048	merge.DEL.776	1	1	1	1	1
chr1	41329373	41329552	merge.DEL.777	1	1	1	1	1
chr1	41531514	41531691	merge.DEL.778	1	1	1	1	1
chr1	41544930	41545040	merge.DEL.779	1	0	1	1	0
chr1	41545275	41545514	merge.DEL.780	1	1	0	1	0
chr1	41635491	41635669	merge.DEL.781	1	1	1	1	1
chr1	41638209	41638403	merge.DEL.782	1	1	1	1	1
chr1	41824765	41824858	merge.DEL.783	1	1	1	1	1
chr1	42277507	42277848	merge.DEL.784	1	1	1	1	1
chr1	42351704	42356637	merge.DEL.785	0	1	1	1	0
chr1	42369154	42369200	merge.DEL.786	1	1	1	1	1
chr1	42385847	42385909	merge.DEL.787	1	0	1	1	1
chr1	42452442	42459371	merge.DEL.788	1	0	1	0	0
chr1	42542529	42542864	merge.DEL.789	1	1	1	1	1
chr1	42660541	42679230	merge.DEL.790	1	1	1	1	0
chr1	42722778	42733168	merge.DEL.791	1	1	1	1	0
chr1	42750617	42750693	merge.DEL.792	1	1	1	1	1
chr1	42753946	42764293	merge.DEL.793	1	1	1	1	0
chr1	42985925	43004624	merge.DEL.794	1	1	1	1	0
chr1	43026694	43032731	merge.DEL.795	1	1	1	1	0
chr1	43075506	43082455	merge.DEL.796	1	1	1	1	0
chr1	43391783	43392137	merge.DEL.797	1	1	1	1	1
chr1	43392674	43401747	merge.DEL.798	1	1	1	1	0
chr1	43407937	43414597	merge.DEL.799	1	0	1	1	0
chr1	43593995	43594263	merge.DEL.800	0	0	1	1	0
chr1	43626047	43648083	merge.DEL.801	1	1	1	1	0
chr1	43685724	43686410	merge.DEL.802	1	1	0	0	0
chr1	43904944	43904990	merge.DEL.803	1	1	1	0	0
chr1	43905094	43905270	merge.DEL.804	1	1	1	1	1
chr1	43917481	43917573	merge.DEL.805	1	1	1	1	1
chr1	44006603	44025814	merge.DEL.806	1	1	0	1	0
chr1	44037356	44048027	merge.DEL.807	1	1	0	1	0
chr1	44069467	44069516	merge.DEL.808	0	1	1	1	0
chr1	44087746	44087780	merge.DEL.809	1	1	1	1	0
chr1	44089973	44108974	merge.DEL.810	1	1	1	1	0
chr1	44140270	44140417	merge.DEL.811	1	1	1	1	1
chr1	44177186	44181614	merge.DEL.812	1	1	0	1	0
chr1	44446633	44452770	merge.DEL.813	0	1	1	1	0
chr1	44487572	44494949	merge.DEL.814	1	1	0	1	0
chr1	44587411	44594023	merge.DEL.815	1	0	1	1	0
chr1	44681102	44685921	merge.DEL.816	1	1	0	1	0
chr1	44703666	44715864	merge.DEL.817	1	1	1	1	0
chr1	44722638	44730812	merge.DEL.818	1	1	1	1	0
chr1	44741398	44774807	merge.DEL.819	1	1	1	1	0
chr1	44789667	44799594	merge.DEL.820	1	1	1	1	0
chr1	44812651	44819195	merge.DEL.821	1	1	1	1	1
chr1	44838510	44842544	merge.DEL.822	1	1	1	1	0
chr1	44924045	44935604	merge.DEL.823	1	1	1	0	0
chr1	44937721	44945449	merge.DEL.824	1	1	1	1	0
chr1	44951926	44952833	merge.DEL.825	1	1	1	1	1
chr1	44955849	44985104	merge.DEL.826	1	1	1	1	0
chr1	44988097	44998427	merge.DEL.827	1	0	1	1	0
chr1	45044735	45044807	merge.DEL.828	1	1	1	1	1
chr1	45053560	45069272	merge.DEL.829	1	1	1	1	0
chr1	45211069	45218908	merge.DEL.830	1	0	0	1	0
chr1	45223025	45223122	merge.DEL.831	1	1	1	1	1
chr1	45301469	45303250	merge.DEL.832	1	1	1	1	0
chr1	45308527	45315870	merge.DEL.833	1	1	0	1	0
chr1	45323615	45325280	merge.DEL.834	1	1	1	1	0
chr1	45399567	45403101	merge.DEL.835	1	1	1	0	0
chr1	45476246	45489528	merge.DEL.836	1	1	1	1	0
chr1	45494898	45497127	merge.DEL.837	0	0	1	0	0
chr1	45500814	45506743	merge.DEL.838	1	0	1	1	0
chr1	45517791	45517922	merge.DEL.839	1	1	1	1	1
chr1	45537941	45539809	merge.DEL.840	1	0	1	1	0
chr1	45553135	45567847	merge.DEL.841	1	1	1	1	0
chr1	45574958	45582980	merge.DEL.842	1	1	1	1	0
chr1	45588208	45593553	merge.DEL.843	1	1	1	0	0
chr1	45731679	45736780	merge.DEL.844	1	1	1	1	0
chr1	45736981	45749820	merge.DEL.845	1	1	1	1	0
chr1	45763422	45775580	merge.DEL.846	1	1	1	1	0
chr1	45776395	45785377	merge.DEL.847	1	1	1	1	0
chr1	45805241	45811136	merge.DEL.848	1	1	1	1	0
chr1	45867611	45890832	merge.DEL.849	1	1	1	1	0
chr1	45900436	45900784	merge.DEL.850	1	1	1	1	1
chr1	46047331	46064546	merge.DEL.851	1	1	1	0	0
chr1	46135770	46152865	merge.DEL.852	1	1	1	1	0
chr1	46164612	46178341	merge.DEL.853	1	0	1	1	0
chr1	46200872	46209764	merge.DEL.854	1	0	1	1	0
chr1	46212895	46216222	merge.DEL.855	1	0	1	1	0
chr1	46222982	46243485	merge.DEL.856	1	1	1	1	1
chr1	46250904	46259709	merge.DEL.857	1	1	1	1	0
chr1	46262141	46270097	merge.DEL.858	1	1	1	1	0
chr1	46282029	46296355	merge.DEL.859	1	1	1	1	0
chr1	46304426	46315162	merge.DEL.860	1	1	1	1	0
chr1	46317314	46332879	merge.DEL.861	1	1	1	1	0
chr1	46337063	46338598	merge.DEL.862	1	1	1	1	0
chr1	46372849	46382893	merge.DEL.863	1	1	1	1	0
chr1	46401120	46401172	merge.DEL.864	0	1	0	1	0
chr1	46509361	46521435	merge.DEL.865	1	1	1	1	0
chr1	46540353	46540396	merge.DEL.866	1	0	1	1	0
chr1	46578702	46587589	merge.DEL.867	1	1	1	1	1
chr1	47184327	47184524	merge.DEL.868	1	1	1	1	0
chr1	47303378	47311151	merge.DEL.869	1	1	1	0	0
chr1	47315139	47331686	merge.DEL.870	1	1	1	1	0
chr1	47342654	47357376	merge.DEL.871	1	1	1	1	0
chr1	47359514	47368020	merge.DEL.872	1	1	1	1	0
chr1	47368219	47387155	merge.DEL.873	1	1	1	1	0
chr1	47591371	47591456	merge.DEL.874	1	1	1	1	1
chr1	47708426	47708513	merge.DEL.875	0	0	0	1	0
chr1	47708514	47708636	merge.DEL.876	0	1	1	1	1
chr1	47874610	47884656	merge.DEL.877	0	1	1	1	0
chr1	48382457	48382687	merge.DEL.878	1	1	1	1	1
chr1	48483685	48483902	merge.DEL.879	1	1	1	1	1
chr1	48711713	48711780	merge.DEL.880	1	1	1	1	1
chr1	48831338	48901867	merge.DEL.881	0	1	0	1	0
chr1	48980710	48980780	merge.DEL.882	1	1	1	1	1
chr1	49084102	49084215	merge.DEL.883	1	1	1	1	1
chr1	49237514	49237574	merge.DEL.884	1	1	1	1	1
chr1	49555251	49555468	merge.DEL.885	1	1	1	1	0
chr1	50369261	50369293	merge.DEL.886	1	1	1	1	0
chr1	50723418	50734629	merge.DEL.887	1	1	1	0	0
chr1	50745020	50751590	merge.DEL.888	1	1	1	1	0
chr1	50796351	50854483	merge.DEL.889	1	1	1	1	1
chr1	50931912	50958728	merge.DEL.890	1	1	1	1	0
chr1	51054470	51055448	merge.DEL.891	0	1	1	0	0
chr1	51196918	51205257	merge.DEL.892	1	1	1	0	0
chr1	51206650	51221312	merge.DEL.893	1	1	1	1	0
chr1	51307532	51310170	merge.DEL.894	1	1	1	1	0
chr1	51332391	51340975	merge.DEL.895	1	1	1	1	0
chr1	51371210	51380241	merge.DEL.896	1	1	1	1	0
chr1	51591730	51597465	merge.DEL.897	1	1	0	0	0
chr1	51602112	51611869	merge.DEL.898	1	0	1	1	0
chr1	51844758	51844828	merge.DEL.899	1	1	1	0	0
chr1	51994356	52031563	merge.DEL.900	1	0	1	1	0
chr1	52037483	52045976	merge.DEL.901	1	1	1	0	0
chr1	52051632	52067117	merge.DEL.902	1	1	1	1	0
chr1	52096114	52118552	merge.DEL.903	1	0	1	1	0
chr1	52132525	52139351	merge.DEL.904	1	1	1	1	0
chr1	52148033	52157607	merge.DEL.905	1	1	1	1	0
chr1	52371684	52391166	merge.DEL.906	1	1	1	1	0
chr1	52395557	52399655	merge.DEL.907	1	0	1	0	0
chr1	52406155	52416609	merge.DEL.908	1	1	0	1	0
chr1	52419079	52422660	merge.DEL.909	1	1	1	1	0
chr1	52555944	52570399	merge.DEL.910	1	1	1	1	0
chr1	52664230	52686628	merge.DEL.911	1	1	1	1	0
chr1	52689268	52697820	merge.DEL.912	1	1	1	1	0
chr1	52699219	52725937	merge.DEL.913	1	1	1	1	0
chr1	52729710	52737779	merge.DEL.914	1	1	1	0	0
chr1	52745933	52754676	merge.DEL.915	1	1	1	0	0
chr1	52754991	52760138	merge.DEL.916	1	1	1	1	0
chr1	52828779	52841474	merge.DEL.917	1	1	1	1	0
chr1	52846242	52846356	merge.DEL.918	1	1	1	1	0
chr1	52868006	52874283	merge.DEL.919	1	1	1	1	1
chr1	52878677	52902543	merge.DEL.920	1	1	1	1	0
chr1	53227767	53229507	merge.DEL.921	1	0	0	1	0
chr1	53364855	53366135	merge.DEL.922	0	1	1	1	0
chr1	53502244	53502579	merge.DEL.923	1	1	1	1	1
chr1	53707390	53708021	merge.DEL.924	1	0	1	1	0
chr1	53713245	53713323	merge.DEL.925	1	1	0	1	0
chr1	53881003	53888152	merge.DEL.926	1	0	1	1	0
chr1	54154374	54154442	merge.DEL.927	1	1	1	1	1
chr1	54203778	54214070	merge.DEL.928	1	1	1	1	0
chr1	54405718	54405760	merge.DEL.929	0	1	1	1	0
chr1	54417771	54420367	merge.DEL.930	1	1	1	0	0
chr1	54426465	54449960	merge.DEL.931	1	1	1	1	0
chr1	54452064	54485254	merge.DEL.932	1	1	1	1	0
chr1	54500595	54515967	merge.DEL.933	1	1	1	1	0
chr1	54525702	54530804	merge.DEL.934	1	1	0	0	0
chr1	54550840	54564080	merge.DEL.935	1	1	0	1	0
chr1	54626598	54630333	merge.DEL.936	1	1	1	1	1
chr1	54654463	54661822	merge.DEL.937	1	1	1	1	0
chr1	54736194	54736258	merge.DEL.938	1	1	1	0	0
chr1	54868657	54868733	merge.DEL.939	1	1	1	1	1
chr1	54870821	54870889	merge.DEL.940	1	1	1	1	1
chr1	54890832	54895606	merge.DEL.941	1	1	1	1	0
chr1	54921322	54921361	merge.DEL.942	1	1	1	1	1
chr1	54926581	54926699	merge.DEL.943	0	1	1	1	0
chr1	55398612	55398683	merge.DEL.944	1	1	1	1	0
chr1	55420706	55420764	merge.DEL.945	1	1	1	1	1
chr1	55508338	55514037	merge.DEL.946	1	1	1	1	1
chr1	55663665	55663828	merge.DEL.947	1	1	1	1	1
chr1	55665602	55665722	merge.DEL.948	1	1	1	1	1
chr1	55667558	55667635	merge.DEL.949	1	1	1	1	1
chr1	55935607	55935932	merge.DEL.950	1	1	1	1	1
chr1	56365435	56369309	merge.DEL.951	1	1	1	1	1
chr1	56422031	56422361	merge.DEL.952	1	1	1	1	1
chr1	56885367	56885500	merge.DEL.953	1	1	1	1	1
chr1	56941478	56941559	merge.DEL.954	0	1	1	1	0
chr1	57273582	57273626	merge.DEL.955	1	1	1	1	0
chr1	57395727	57395834	merge.DEL.956	1	1	1	1	1
chr1	58278224	58279155	merge.DEL.957	1	1	1	1	1
chr1	58648555	58648609	merge.DEL.958	1	1	1	1	1
chr1	58651317	58651360	merge.DEL.959	1	1	1	1	1
chr1	58981102	58981300	merge.DEL.960	1	1	1	1	1
chr1	60624633	60624698	merge.DEL.961	1	1	1	1	1
chr1	60732662	60732731	merge.DEL.962	1	1	1	1	1
chr1	60920101	60920137	merge.DEL.963	1	1	1	1	1
chr1	61072432	61075290	merge.DEL.964	1	1	0	0	0
chr1	61698350	61706758	merge.DEL.965	1	1	1	0	0
chr1	61711225	61721437	merge.DEL.966	1	0	1	1	0
chr1	61726529	61745495	merge.DEL.967	1	1	1	1	0
chr1	61924910	61925273	merge.DEL.968	1	1	1	1	1
chr1	62130869	62135532	merge.DEL.969	1	1	0	1	0
chr1	62139784	62156256	merge.DEL.970	0	1	0	1	0
chr1	62170496	62173707	merge.DEL.971	1	1	1	1	0
chr1	62189542	62189588	merge.DEL.972	1	1	1	1	1
chr1	62213818	62219922	merge.DEL.973	1	1	0	1	0
chr1	62246949	62250317	merge.DEL.974	1	1	1	1	1
chr1	62402511	62417140	merge.DEL.975	1	1	1	1	0
chr1	62686145	62686494	merge.DEL.976	1	1	1	1	1
chr1	62689170	62689232	merge.DEL.977	1	1	1	0	0
chr1	63046001	63046041	merge.DEL.978	1	0	1	1	0
chr1	63186739	63186802	merge.DEL.979	1	1	1	1	1
chr1	63239686	63242487	merge.DEL.980	1	1	1	1	1
chr1	63292777	63312495	merge.DEL.981	0	1	1	1	0
chr1	63361542	63365919	merge.DEL.982	1	1	1	1	0
chr1	63371855	63382994	merge.DEL.983	1	0	1	1	0
chr1	63400220	63400338	merge.DEL.984	1	1	1	1	1
chr1	63422409	63422439	merge.DEL.985	1	1	1	1	0
chr1	63647260	63647313	merge.DEL.986	1	1	1	1	1
chr1	63863708	63863809	merge.DEL.987	1	1	1	1	1
chr1	64412337	64416602	merge.DEL.988	1	1	1	1	1
chr1	64416825	64416879	merge.DEL.989	1	1	1	1	0
chr1	64734647	64734851	merge.DEL.990	1	1	1	1	1
chr1	64878562	64878615	merge.DEL.991	1	1	1	1	1
chr1	65152607	65158803	merge.DEL.992	1	0	1	1	0
chr1	65216547	65216912	merge.DEL.993	1	1	1	1	1
chr1	65302233	65302304	merge.DEL.994	1	1	1	1	1
chr1	65613472	65613742	merge.DEL.995	1	1	1	1	1
chr1	65662059	65662173	merge.DEL.996	1	1	1	1	1
chr1	65691089	65691178	merge.DEL.997	1	1	1	1	1
chr1	65693792	65693899	merge.DEL.998	1	1	1	1	0
chr1	65693918	65693978	merge.DEL.999	1	0	1	1	1
chr1	65798227	65798560	merge.DEL.1000	1	1	1	1	1
chr1	66307688	66308132	merge.DEL.1001	1	1	1	1	0
chr1	66445123	66445172	merge.DEL.1002	1	1	1	1	1
chr1	66735522	66735872	merge.DEL.1003	1	1	1	1	1
chr1	66845191	66845225	merge.DEL.1004	1	1	1	1	1
chr1	66945268	66945325	merge.DEL.1005	1	1	1	1	1
chr1	66995432	66995486	merge.DEL.1006	1	1	1	1	0
chr1	67386871	67386907	merge.DEL.1007	1	1	1	1	1
chr1	67680877	67681898	merge.DEL.1008	0	1	1	1	0
chr1	67693349	67700183	merge.DEL.1009	1	0	1	0	0
chr1	67709904	67710247	merge.DEL.1010	1	1	1	1	1
chr1	68238447	68244118	merge.DEL.1011	1	0	1	1	0
chr1	68616839	68616900	merge.DEL.1012	1	1	1	1	1
chr1	68764934	68765099	merge.DEL.1013	1	1	1	1	1
chr1	69341310	69341642	merge.DEL.1014	1	1	1	1	1
chr1	69478029	69478358	merge.DEL.1015	1	1	1	1	1
chr1	69518639	69518748	merge.DEL.1016	1	1	1	1	1
chr1	69561641	69562004	merge.DEL.1017	1	1	1	1	1
chr1	69608843	69608879	merge.DEL.1018	1	0	1	0	1
chr1	69717788	69717887	merge.DEL.1019	1	1	1	1	1
chr1	69778918	69779034	merge.DEL.1020	1	1	1	1	1
chr1	69781721	69781785	merge.DEL.1021	1	1	1	1	1
chr1	70255041	70255485	merge.DEL.1022	0	1	1	1	0
chr1	70356823	70358985	merge.DEL.1023	1	1	1	0	0
chr1	70480504	70480852	merge.DEL.1024	1	1	1	1	1
chr1	70510392	70510446	merge.DEL.1025	1	1	0	1	0
chr1	70647145	70647233	merge.DEL.1026	1	1	1	1	1
chr1	70647298	70647872	merge.DEL.1027	1	1	1	1	0
chr1	71275633	71275961	merge.DEL.1028	1	1	1	1	1
chr1	71898948	71899041	merge.DEL.1029	1	1	1	1	1
chr1	71983932	71984350	merge.DEL.1030	1	1	1	1	1
chr1	71999647	71999688	merge.DEL.1031	1	1	1	1	1
chr1	72144440	72144504	merge.DEL.1032	1	1	1	1	1
chr1	72300641	72346159	merge.DEL.1033	1	1	1	1	1
chr1	72526639	72526671	merge.DEL.1034	1	1	1	1	1
chr1	72556903	72556957	merge.DEL.1035	1	1	1	1	1
chr1	72795591	72795636	merge.DEL.1036	1	1	1	1	1
chr1	73287917	73288235	merge.DEL.1037	1	1	1	1	1
chr1	73299095	73303455	merge.DEL.1038	1	1	1	1	1
chr1	73739077	73739114	merge.DEL.1039	1	1	1	1	1
chr1	74289479	74289606	merge.DEL.1040	1	1	1	1	1
chr1	74500604	74500641	merge.DEL.1041	1	1	1	0	1
chr1	74671136	74671287	merge.DEL.1042	1	1	1	1	1
chr1	75105214	75105272	merge.DEL.1043	1	1	1	1	1
chr1	75377370	75383472	merge.DEL.1044	1	1	1	1	1
chr1	75472969	75491394	merge.DEL.1045	1	1	1	1	0
chr1	75546181	75546520	merge.DEL.1046	1	1	1	1	1
chr1	75729733	75738514	merge.DEL.1047	1	0	1	1	0
chr1	75774595	75774647	merge.DEL.1048	1	1	1	1	0
chr1	75902671	75902736	merge.DEL.1049	1	1	1	1	1
chr1	75962598	75962768	merge.DEL.1050	1	1	1	1	1
chr1	76277514	76277616	merge.DEL.1051	1	1	1	1	1
chr1	76846257	76846327	merge.DEL.1052	1	1	1	1	1
chr1	77189695	77189763	merge.DEL.1053	1	1	1	1	1
chr1	77444221	77444424	merge.DEL.1054	1	1	1	1	1
chr1	77470825	77470884	merge.DEL.1055	1	1	1	1	1
chr1	77475395	77475506	merge.DEL.1056	1	1	1	1	1
chr1	77764865	77772686	merge.DEL.1057	0	1	1	0	0
chr1	77864149	77865379	merge.DEL.1058	1	1	1	1	0
chr1	77972781	77977543	merge.DEL.1059	1	1	1	0	0
chr1	77981603	78001816	merge.DEL.1060	1	1	1	1	0
chr1	78061616	78061732	merge.DEL.1061	1	1	1	1	1
chr1	78083966	78084077	merge.DEL.1062	1	1	1	1	1
chr1	78282150	78282238	merge.DEL.1063	1	1	1	1	1
chr1	78415645	78415678	merge.DEL.1064	1	1	1	1	1
chr1	78415694	78415764	merge.DEL.1065	1	1	0	1	0
chr1	78675493	78675552	merge.DEL.1066	1	1	1	1	1
chr1	78935824	78936168	merge.DEL.1067	0	1	1	1	1
chr1	79571282	79571626	merge.DEL.1068	1	1	1	1	1
chr1	79571689	79571817	merge.DEL.1069	1	1	1	1	1
chr1	79571957	79572268	merge.DEL.1070	1	1	1	1	1
chr1	79756089	79757348	merge.DEL.1071	1	1	1	1	1
chr1	80329162	80329202	merge.DEL.1072	1	1	1	0	0
chr1	80329228	80329339	merge.DEL.1073	1	1	1	1	1
chr1	80728656	80728993	merge.DEL.1074	1	1	1	0	1
chr1	80939061	80945280	merge.DEL.1075	1	1	1	1	1
chr1	81178058	81178103	merge.DEL.1076	1	1	0	1	1
chr1	81222100	81222440	merge.DEL.1077	1	1	1	1	1
chr1	82046232	82046459	merge.DEL.1078	1	1	1	1	1
chr1	82576962	82577284	merge.DEL.1079	1	1	1	0	1
chr1	82660276	82661906	merge.DEL.1080	1	1	1	1	1
chr1	82684167	82684230	merge.DEL.1081	1	1	1	1	1
chr1	83013549	83013666	merge.DEL.1082	1	1	1	1	1
chr1	83019213	83019306	merge.DEL.1083	1	1	1	1	1
chr1	83685684	83685743	merge.DEL.1084	1	1	1	1	0
chr1	84052243	84058962	merge.DEL.1085	1	1	1	1	1
chr1	84474129	84478709	merge.DEL.1086	1	0	1	1	0
chr1	85130633	85130727	merge.DEL.1087	1	1	1	1	1
chr1	85282935	85283283	merge.DEL.1088	1	1	1	1	1
chr1	85288474	85289205	merge.DEL.1089	1	0	1	1	0
chr1	85440796	85440881	merge.DEL.1090	1	1	1	1	1
chr1	85935169	85938856	merge.DEL.1091	1	1	1	1	1
chr1	85940107	85940436	merge.DEL.1092	1	0	1	1	1
chr1	86097480	86097560	merge.DEL.1093	1	1	1	1	1
chr1	86814019	86817767	merge.DEL.1094	1	1	1	1	0
chr1	87048583	87048690	merge.DEL.1095	1	1	1	1	1
chr1	88416042	88416135	merge.DEL.1096	0	1	1	1	1
chr1	88657259	88657297	merge.DEL.1097	1	1	1	1	1
chr1	88975403	88978770	merge.DEL.1098	1	1	1	1	0
chr1	89295605	89295677	merge.DEL.1099	1	1	1	1	1
chr1	89354534	89354722	merge.DEL.1100	1	1	1	1	1
chr1	89797752	89797795	merge.DEL.1101	1	1	1	1	0
chr1	89797854	89798065	merge.DEL.1102	1	1	1	1	1
chr1	89967696	89969725	merge.DEL.1103	1	0	1	1	0
chr1	90392794	90392936	merge.DEL.1104	1	1	1	1	1
chr1	90693065	90698146	merge.DEL.1105	1	1	1	1	0
chr1	91095192	91096984	merge.DEL.1106	0	1	1	1	0
chr1	91159214	91159521	merge.DEL.1107	1	1	1	1	1
chr1	91168639	91168742	merge.DEL.1108	1	1	1	1	1
chr1	91169301	91169416	merge.DEL.1109	1	1	1	1	1
chr1	91169449	91169488	merge.DEL.1110	1	1	1	1	0
chr1	91448539	91449010	merge.DEL.1111	1	1	1	1	1
chr1	91459695	91459780	merge.DEL.1112	1	1	1	1	1
chr1	91460047	91460123	merge.DEL.1113	1	1	1	1	0
chr1	91460143	91460388	merge.DEL.1114	1	1	1	1	1
chr1	91460416	91460491	merge.DEL.1115	1	1	1	0	0
chr1	91668730	91669397	merge.DEL.1116	1	1	1	1	1
chr1	91766491	91767779	merge.DEL.1117	1	1	1	1	1
chr1	91818278	91818323	merge.DEL.1118	1	1	1	1	1
chr1	91962145	91962178	merge.DEL.1119	1	1	1	1	1
chr1	92215791	92215849	merge.DEL.1120	1	1	1	1	1
chr1	92375844	92398160	merge.DEL.1121	1	1	1	1	0
chr1	92405217	92408194	merge.DEL.1122	1	1	1	1	0
chr1	92513534	92513571	merge.DEL.1123	1	1	1	1	1
chr1	92787706	92789355	merge.DEL.1124	1	1	1	1	0
chr1	92793184	92830939	merge.DEL.1125	1	1	1	1	1
chr1	92940996	92941029	merge.DEL.1126	1	1	1	1	1
chr1	93507090	93507171	merge.DEL.1127	1	1	1	1	0
chr1	93822815	93825706	merge.DEL.1128	1	1	1	1	1
chr1	93933004	93933038	merge.DEL.1129	1	1	1	0	1
chr1	94384466	94384515	merge.DEL.1130	1	1	1	1	1
chr1	94386024	94386080	merge.DEL.1131	0	1	1	1	0
chr1	94477678	94477770	merge.DEL.1132	1	1	1	1	1
chr1	95045906	95045982	merge.DEL.1133	1	1	1	1	1
chr1	95074603	95082347	merge.DEL.1134	1	1	1	1	0
chr1	95130187	95130222	merge.DEL.1135	1	1	1	1	1
chr1	95222421	95225278	merge.DEL.1136	1	1	1	1	1
chr1	95249850	95249994	merge.DEL.1137	1	1	1	1	1
chr1	96017525	96017701	merge.DEL.1138	1	1	1	1	1
chr1	96403162	96403330	merge.DEL.1139	1	1	1	1	1
chr1	96524300	96524383	merge.DEL.1140	1	1	1	1	1
chr1	96724519	96726691	merge.DEL.1141	1	1	1	1	0
chr1	97130744	97130872	merge.DEL.1142	1	1	1	1	1
chr1	97229544	97229582	merge.DEL.1143	1	1	1	1	1
chr1	97323543	97323674	merge.DEL.1144	1	1	1	1	0
chr1	98512874	98513050	merge.DEL.1145	1	1	1	1	1
chr1	98714363	98714494	merge.DEL.1146	1	1	1	1	1
chr1	98856473	98856509	merge.DEL.1147	1	1	1	1	1
chr1	99510418	99510579	merge.DEL.1148	1	1	1	1	1
chr1	99683020	99683123	merge.DEL.1149	1	1	1	1	1
chr1	99770511	99778698	merge.DEL.1150	1	1	1	0	0
chr1	99856306	99856373	merge.DEL.1151	1	1	1	1	1
chr1	100191748	100191790	merge.DEL.1152	1	1	1	1	1
chr1	100238126	100238231	merge.DEL.1153	1	1	1	1	1
chr1	100817811	100817938	merge.DEL.1154	1	1	1	1	1
chr1	101253170	101253290	merge.DEL.1155	1	1	1	1	1
chr1	101253762	101253912	merge.DEL.1156	1	1	1	1	0
chr1	101425689	101425723	merge.DEL.1157	1	1	1	1	1
chr1	101657854	101658039	merge.DEL.1158	1	1	1	1	1
chr1	102093586	102093725	merge.DEL.1159	1	1	0	1	1
chr1	102411227	102411257	merge.DEL.1160	1	1	1	0	1
chr1	102482647	102482682	merge.DEL.1161	0	1	1	1	0
chr1	102582123	102582465	merge.DEL.1162	1	1	1	1	1
chr1	102630509	102630830	merge.DEL.1163	1	1	1	1	1
chr1	102645434	102645571	merge.DEL.1164	1	1	1	1	1
chr1	103043035	103043189	merge.DEL.1165	1	1	1	1	1
chr1	103182593	103182661	merge.DEL.1166	1	1	1	1	0
chr1	103363522	103363555	merge.DEL.1167	1	1	1	1	0
chr1	103364688	103364722	merge.DEL.1168	1	1	1	1	1
chr1	103365287	103365385	merge.DEL.1169	1	1	0	1	1
chr1	103621119	103621199	merge.DEL.1170	1	1	1	1	1
chr1	103900575	103901104	merge.DEL.1171	1	1	0	1	1
chr1	103908874	103909040	merge.DEL.1172	1	1	1	1	1
chr1	104160307	104160393	merge.DEL.1173	1	1	1	1	1
chr1	104177225	104177556	merge.DEL.1174	1	1	1	1	1
chr1	104349303	104349444	merge.DEL.1175	1	1	1	1	1
chr1	104873328	104873372	merge.DEL.1176	1	1	0	1	0
chr1	104874180	104874238	merge.DEL.1177	1	1	1	1	1
chr1	104885688	104886025	merge.DEL.1178	1	1	1	1	1
chr1	105063744	105063780	merge.DEL.1179	1	1	1	1	1
chr1	105324149	105324423	merge.DEL.1180	1	1	1	1	1
chr1	105374250	105374308	merge.DEL.1181	1	1	1	0	1
chr1	105630874	105631119	merge.DEL.1182	1	1	1	1	1
chr1	105707764	105707800	merge.DEL.1183	1	1	1	1	1
chr1	105769140	105769445	merge.DEL.1184	1	1	1	1	1
chr1	106426996	106427165	merge.DEL.1185	1	1	1	1	1
chr1	106476552	106476611	merge.DEL.1186	1	1	1	1	1
chr1	106560850	106560937	merge.DEL.1187	1	1	1	0	1
chr1	107019933	107019986	merge.DEL.1188	1	1	1	1	1
chr1	107468833	107469748	merge.DEL.1189	0	1	1	1	0
chr1	107644926	107644984	merge.DEL.1190	1	1	1	1	1
chr1	108023177	108023283	merge.DEL.1191	1	1	1	1	0
chr1	108367925	108368005	merge.DEL.1192	1	1	1	1	1
chr1	108523822	108523923	merge.DEL.1193	1	1	1	1	1
chr1	108677222	108687687	merge.DEL.1194	1	1	1	1	0
chr1	108772335	108772435	merge.DEL.1195	1	1	1	0	0
chr1	108866585	108875752	merge.DEL.1196	1	0	1	1	0
chr1	108917608	108917666	merge.DEL.1197	1	1	1	1	1
chr1	109042946	109056600	merge.DEL.1198	1	1	1	1	1
chr1	109062331	109071266	merge.DEL.1199	1	1	1	1	0
chr1	109071953	109072154	merge.DEL.1200	1	1	1	1	1
chr1	109076591	109089026	merge.DEL.1201	1	1	1	1	0
chr1	109094018	109098259	merge.DEL.1202	1	1	1	1	0
chr1	109098517	109108273	merge.DEL.1203	1	1	1	1	0
chr1	109116990	109125231	merge.DEL.1204	0	1	1	1	0
chr1	109148257	109148336	merge.DEL.1205	1	1	1	1	1
chr1	109201890	109207911	merge.DEL.1206	1	0	1	1	0
chr1	109221983	109222037	merge.DEL.1207	1	1	1	1	0
chr1	109287367	109288479	merge.DEL.1208	1	1	1	1	0
chr1	109358748	109360230	merge.DEL.1209	1	0	1	1	0
chr1	109378700	109378732	merge.DEL.1210	1	1	1	1	0
chr1	109511249	109511320	merge.DEL.1211	1	1	1	1	1
chr1	109641140	109648828	merge.DEL.1212	1	1	1	1	1
chr1	109654075	109654310	merge.DEL.1213	1	1	1	1	1
chr1	109713680	109713945	merge.DEL.1214	1	1	1	1	0
chr1	110028793	110029240	merge.DEL.1215	1	1	1	1	0
chr1	110404788	110412063	merge.DEL.1216	1	1	1	1	0
chr1	110458036	110458082	merge.DEL.1217	1	1	1	1	1
chr1	110504899	110504938	merge.DEL.1218	1	1	1	1	1
chr1	110569612	110569818	merge.DEL.1219	1	1	1	1	1
chr1	110773780	110773989	merge.DEL.1220	1	1	1	1	1
chr1	110885283	110890299	merge.DEL.1221	1	1	1	1	0
chr1	111245805	111245856	merge.DEL.1222	1	1	1	1	1
chr1	111315895	111315935	merge.DEL.1223	1	1	1	1	1
chr1	111414880	111414979	merge.DEL.1224	1	1	1	1	1
chr1	111428789	111428836	merge.DEL.1225	1	1	1	1	1
chr1	111502174	111502288	merge.DEL.1226	1	1	1	1	0
chr1	111529895	111530094	merge.DEL.1227	1	1	1	1	1
chr1	111544742	111545135	merge.DEL.1228	1	1	1	1	1
chr1	111607683	111608036	merge.DEL.1229	1	1	1	1	1
chr1	111740733	111742347	merge.DEL.1230	1	0	1	1	0
chr1	112005748	112005855	merge.DEL.1231	1	1	1	1	1
chr1	112222092	112222150	merge.DEL.1232	1	1	1	1	1
chr1	112292463	112295063	merge.DEL.1233	1	1	1	1	1
chr1	112446849	112455383	merge.DEL.1234	0	1	1	1	0
chr1	112660953	112665281	merge.DEL.1235	1	0	1	0	0
chr1	112706412	112706503	merge.DEL.1236	1	1	1	1	1
chr1	112751474	112756770	merge.DEL.1237	1	1	0	1	0
chr1	112764487	112766950	merge.DEL.1238	1	1	1	1	0
chr1	112773520	112773810	merge.DEL.1239	1	1	1	1	1
chr1	112777999	112796937	merge.DEL.1240	1	1	1	1	0
chr1	112833540	112842751	merge.DEL.1241	1	1	0	1	0
chr1	112844635	112888206	merge.DEL.1242	1	1	1	1	0
chr1	112916677	112920874	merge.DEL.1243	1	1	0	1	0
chr1	112939181	112953447	merge.DEL.1244	1	1	1	1	0
chr1	112958556	112993977	merge.DEL.1245	1	1	1	1	0
chr1	113016992	113025811	merge.DEL.1246	1	1	1	1	1
chr1	113031810	113039205	merge.DEL.1247	1	1	1	1	0
chr1	113048308	113055368	merge.DEL.1248	1	0	1	1	0
chr1	113068689	113071174	merge.DEL.1249	1	1	1	1	1
chr1	113120424	113127511	merge.DEL.1250	1	1	1	1	0
chr1	113173010	113173313	merge.DEL.1251	1	1	1	1	1
chr1	113257004	113257482	merge.DEL.1252	1	1	1	1	1
chr1	113437857	113437926	merge.DEL.1253	1	1	1	1	1
chr1	113497205	113503272	merge.DEL.1254	1	1	1	1	1
chr1	113641081	113641160	merge.DEL.1255	0	1	1	1	1
chr1	113731692	113756901	merge.DEL.1256	1	1	1	0	0
chr1	113826965	113845494	merge.DEL.1257	1	1	1	0	0
chr1	113880365	113888847	merge.DEL.1258	1	1	0	1	0
chr1	114242554	114242683	merge.DEL.1259	1	1	1	1	1
chr1	114500895	114501219	merge.DEL.1260	1	1	1	1	1
chr1	114529314	114533887	merge.DEL.1261	1	1	1	1	0
chr1	114646169	114657052	merge.DEL.1262	1	1	1	1	0
chr1	115254267	115254562	merge.DEL.1263	1	1	1	1	1
chr1	115568535	115568645	merge.DEL.1264	1	1	1	1	1
chr1	116100710	116100827	merge.DEL.1265	1	1	1	1	1
chr1	116369367	116369520	merge.DEL.1266	1	1	1	1	1
chr1	116669580	116673565	merge.DEL.1267	1	1	1	1	0
chr1	117548410	117548643	merge.DEL.1268	1	1	1	1	1
chr1	118401302	118401515	merge.DEL.1269	1	1	1	1	1
chr1	118784364	118784433	merge.DEL.1270	1	1	1	1	1
chr1	119264615	119264712	merge.DEL.1271	1	1	1	1	1
chr1	119421384	119421493	merge.DEL.1272	1	1	1	1	1
chr1	120395077	120397853	merge.DEL.1273	1	1	1	1	0
chr1	120402111	120402910	merge.DEL.1274	1	1	1	1	0
chr1	120441825	120449118	merge.DEL.1275	1	0	1	1	0
chr1	120498257	120498674	merge.DEL.1276	1	1	1	1	1
chr1	120515502	120516202	merge.DEL.1277	1	0	1	1	0
chr1	120576714	120576778	merge.DEL.1278	1	1	1	1	1
chr1	120824840	120837908	merge.DEL.1279	1	1	1	1	1
chr1	120889433	120889499	merge.DEL.1280	1	1	1	1	1
chr1	120934173	120940467	merge.DEL.1281	1	1	1	1	0
chr1	120946632	120949421	merge.DEL.1282	1	1	1	1	0
chr1	121005678	121005721	merge.DEL.1283	1	1	1	1	1
chr1	121124703	121124751	merge.DEL.1284	1	1	1	1	1
chr1	121199694	121204468	merge.DEL.1285	0	1	1	1	0
chr1	121395919	121396919	merge.DEL.1286	1	1	1	1	0
chr1	121399098	121399166	merge.DEL.1287	1	1	1	1	1
chr1	121400101	121400161	merge.DEL.1288	1	1	1	1	1
chr1	121402920	121403389	merge.DEL.1289	1	1	1	1	1
chr1	121540800	121540839	merge.DEL.1290	1	1	1	1	1
chr1	121616052	121619356	merge.DEL.1291	1	1	1	1	1
chr1	121621237	121621505	merge.DEL.1292	1	1	1	1	0
chr1	121621767	121624911	merge.DEL.1293	1	1	1	1	1
chr1	121643427	121646386	merge.DEL.1294	1	1	1	1	1
chr1	121693191	121695308	merge.DEL.1295	1	1	1	1	1
chr1	121725788	121729684	merge.DEL.1296	0	1	1	1	1
chr1	121739324	121740179	merge.DEL.1297	1	1	1	1	1
chr1	121747943	121748302	merge.DEL.1298	1	1	1	1	1
chr1	121749774	121750143	merge.DEL.1299	1	1	1	1	1
chr1	121757220	121758402	merge.DEL.1300	1	1	1	1	1
chr1	121758755	121759774	merge.DEL.1301	1	1	1	1	1
chr1	121763779	121764820	merge.DEL.1302	1	1	1	1	0
chr1	121768145	121768497	merge.DEL.1303	1	1	1	1	0
chr1	121769885	121770565	merge.DEL.1304	1	1	1	1	0
chr1	121778219	121780007	merge.DEL.1305	1	1	0	1	0
chr1	121780643	121782157	merge.DEL.1306	1	1	1	1	0
chr1	121792456	121792904	merge.DEL.1307	1	1	1	1	1
chr1	121795445	121797758	merge.DEL.1308	1	1	1	1	1
chr1	121798890	121800634	merge.DEL.1309	1	1	1	1	1
chr1	121803831	121806209	merge.DEL.1310	1	1	1	1	0
chr1	121807306	121808054	merge.DEL.1311	1	1	1	1	0
chr1	121814518	121817144	merge.DEL.1312	1	1	1	1	0
chr1	121826474	121826599	merge.DEL.1313	1	1	1	1	1
chr1	121826788	121827744	merge.DEL.1314	1	1	1	1	1
chr1	121829221	121829620	merge.DEL.1315	1	1	1	1	1
chr1	121829828	121830716	merge.DEL.1316	1	1	1	1	1
chr1	121832497	121832795	merge.DEL.1317	1	1	1	0	1
chr1	121836495	121836920	merge.DEL.1318	1	1	1	1	1
chr1	121845172	121847653	merge.DEL.1319	1	1	1	1	1
chr1	121872479	121873920	merge.DEL.1320	0	1	1	0	0
chr1	121881149	121884922	merge.DEL.1321	1	1	1	1	0
chr1	121901838	121902738	merge.DEL.1322	1	1	1	1	1
chr1	121933143	121938230	merge.DEL.1323	1	1	1	1	0
chr1	124805935	124808147	merge.DEL.1324	1	1	1	1	0
chr1	124861067	124862667	merge.DEL.1325	1	1	1	1	0
chr1	124871998	124874657	merge.DEL.1326	1	1	1	0	0
chr1	124903806	124905335	merge.DEL.1327	1	1	1	1	0
chr1	124906624	124908257	merge.DEL.1328	1	1	1	1	0
chr1	124909276	124911344	merge.DEL.1329	1	1	1	1	0
chr1	124912082	124912585	merge.DEL.1330	1	1	0	1	0
chr1	124976309	124987057	merge.DEL.1331	1	1	1	1	1
chr1	124996135	124996504	merge.DEL.1332	1	1	1	1	1
chr1	125025265	125025726	merge.DEL.1333	1	1	1	1	1
chr1	125025899	125026080	merge.DEL.1334	1	1	1	1	1
chr1	125027235	125027921	merge.DEL.1335	1	1	1	1	0
chr1	125076944	125076993	merge.DEL.1336	1	1	1	1	0
chr1	125080118	125080184	merge.DEL.1337	1	1	1	1	1
chr1	125083693	125083907	merge.DEL.1338	1	1	1	1	1
chr1	125148428	125148469	merge.DEL.1339	0	1	1	0	1
chr1	125150538	125150653	merge.DEL.1340	1	1	1	1	1
chr1	125151345	125151649	merge.DEL.1341	1	1	1	1	1
chr1	125151675	125151924	merge.DEL.1342	1	1	1	1	1
chr1	125153496	125153542	merge.DEL.1343	1	1	1	0	1
chr1	125153735	125153876	merge.DEL.1344	1	1	1	1	1
chr1	125155006	125155396	merge.DEL.1345	1	1	1	0	1
chr1	125162167	125162261	merge.DEL.1346	1	1	1	1	0
chr1	125167958	125170184	merge.DEL.1347	1	1	0	0	0
chr1	125170286	125171018	merge.DEL.1348	1	1	1	1	1
chr1	125171129	125175153	merge.DEL.1349	1	1	1	1	1
chr1	125175714	125177131	merge.DEL.1350	1	1	1	1	1
chr1	125177504	125178231	merge.DEL.1351	1	1	1	1	1
chr1	125178296	125183701	merge.DEL.1352	1	1	1	1	1
chr1	143185410	143186961	merge.DEL.1353	1	1	1	1	1
chr1	143187389	143200521	merge.DEL.1354	1	1	1	1	1
chr1	143200582	143200728	merge.DEL.1355	0	1	1	1	0
chr1	143200754	143249663	merge.DEL.1356	1	1	1	1	1
chr1	143250071	143254658	merge.DEL.1357	1	1	1	1	1
chr1	143254817	143262035	merge.DEL.1358	1	1	1	1	1
chr1	143262245	143266539	merge.DEL.1359	1	1	1	1	1
chr1	143266788	143267132	merge.DEL.1360	1	1	1	1	1
chr1	143267477	143268102	merge.DEL.1361	1	1	0	1	1
chr1	143268274	143268326	merge.DEL.1362	0	1	0	1	1
chr1	143270529	143270658	merge.DEL.1363	0	1	1	1	1
chr1	143271123	143271278	merge.DEL.1364	0	1	1	1	1
chr1	143271737	143272307	merge.DEL.1365	0	1	1	1	1
chr1	143272693	143274107	merge.DEL.1366	1	1	1	1	1
chr1	143275364	143275458	merge.DEL.1367	1	1	1	1	1
chr1	143502706	143504150	merge.DEL.1368	1	1	1	1	0
chr1	143800212	143800304	merge.DEL.1369	1	1	1	1	1
chr1	144076637	144076702	merge.DEL.1370	1	1	1	0	1
chr1	144095875	144099961	merge.DEL.1371	1	0	1	1	0
chr1	144101580	144101726	merge.DEL.1372	1	1	1	1	0
chr1	144101825	144104417	merge.DEL.1373	1	1	1	1	1
chr1	144104422	144104568	merge.DEL.1374	1	1	1	1	0
chr1	144104657	144105157	merge.DEL.1375	1	1	1	1	1
chr1	144105170	144105412	merge.DEL.1376	1	1	1	1	0
chr1	144105472	144105604	merge.DEL.1377	1	1	1	1	0
chr1	144105628	144105720	merge.DEL.1378	1	0	0	1	0
chr1	144105754	144105867	merge.DEL.1379	1	1	0	1	0
chr1	144105913	144106106	merge.DEL.1380	0	1	1	1	0
chr1	144106126	144106287	merge.DEL.1381	0	0	1	1	0
chr1	144106503	144106869	merge.DEL.1382	1	1	0	1	0
chr1	144137644	144140139	merge.DEL.1383	0	1	1	1	0
chr1	144323662	144323787	merge.DEL.1384	0	0	1	1	0
chr1	144643311	144643371	merge.DEL.1385	1	1	1	1	0
chr1	144643523	144643570	merge.DEL.1386	0	1	1	1	0
chr1	144883747	144883787	merge.DEL.1387	1	1	0	1	0
chr1	144883836	144884067	merge.DEL.1388	1	1	1	1	1
chr1	145044645	145044698	merge.DEL.1389	1	1	1	1	0
chr1	145190135	145193198	merge.DEL.1390	0	0	1	0	0
chr1	145232813	145235787	merge.DEL.1391	1	1	1	1	0
chr1	145427309	145442906	merge.DEL.1392	1	1	1	1	0
chr1	145525723	145525895	merge.DEL.1393	1	1	1	1	1
chr1	145715276	145718373	merge.DEL.1394	1	1	1	1	0
chr1	145763632	145767926	merge.DEL.1395	1	0	1	1	0
chr1	145861526	145870772	merge.DEL.1396	1	1	1	1	0
chr1	145931061	145952904	merge.DEL.1397	1	1	1	1	0
chr1	145965833	145973550	merge.DEL.1398	1	1	1	1	0
chr1	145998716	146006992	merge.DEL.1399	1	1	1	1	0
chr1	146008277	146031029	merge.DEL.1400	1	1	1	1	0
chr1	146039681	146045712	merge.DEL.1401	1	1	1	1	0
chr1	146806463	146808287	merge.DEL.1402	1	1	1	1	1
chr1	146956945	146959601	merge.DEL.1403	1	1	1	1	1
chr1	146986265	146989632	merge.DEL.1404	1	1	1	1	1
chr1	147061201	147061270	merge.DEL.1405	1	1	1	1	1
chr1	147392424	147394108	merge.DEL.1406	1	1	1	0	0
chr1	147531081	147533573	merge.DEL.1407	1	1	0	1	0
chr1	147541070	147541180	merge.DEL.1408	1	1	1	1	1
chr1	147775197	147775260	merge.DEL.1409	1	1	1	1	1
chr1	147839132	147839223	merge.DEL.1410	1	0	1	1	0
chr1	148392656	148400647	merge.DEL.1411	1	1	1	1	0
chr1	148569618	148573790	merge.DEL.1412	1	1	1	1	1
chr1	149629976	149633055	merge.DEL.1413	1	1	1	1	0
chr1	149639973	149644446	merge.DEL.1414	1	1	1	1	0
chr1	149890820	149902877	merge.DEL.1415	1	1	1	1	0
chr1	149919992	149920167	merge.DEL.1416	1	0	1	1	0
chr1	149974117	149978447	merge.DEL.1417	1	1	1	0	0
chr1	150016743	150042461	merge.DEL.1418	1	0	0	0	0
chr1	150238507	150253727	merge.DEL.1419	1	1	1	1	0
chr1	150270933	150277422	merge.DEL.1420	1	1	1	1	0
chr1	150284092	150292786	merge.DEL.1421	1	1	1	0	0
chr1	150295248	150323158	merge.DEL.1422	1	1	1	1	0
chr1	150327312	150339636	merge.DEL.1423	1	1	1	1	0
chr1	150355320	150362026	merge.DEL.1424	1	1	1	1	0
chr1	150367350	150367477	merge.DEL.1425	1	1	1	1	1
chr1	150368473	150383498	merge.DEL.1426	1	1	1	1	0
chr1	150398323	150403916	merge.DEL.1427	1	1	1	1	0
chr1	150424477	150434101	merge.DEL.1428	1	1	1	0	0
chr1	150439134	150462032	merge.DEL.1429	1	0	1	1	0
chr1	150465788	150466111	merge.DEL.1430	1	1	1	0	0
chr1	150478799	150486393	merge.DEL.1431	1	1	1	1	0
chr1	150489673	150507502	merge.DEL.1432	1	1	1	1	0
chr1	150518607	150548281	merge.DEL.1433	1	1	1	1	0
chr1	150582038	150592847	merge.DEL.1434	1	1	1	0	0
chr1	150593321	150611270	merge.DEL.1435	1	1	1	0	0
chr1	150664515	150678950	merge.DEL.1436	0	0	1	1	0
chr1	150718960	150719308	merge.DEL.1437	1	1	1	1	1
chr1	150729226	150729574	merge.DEL.1438	1	1	1	1	1
chr1	150755766	150792810	merge.DEL.1439	1	1	1	1	1
chr1	150866941	150872083	merge.DEL.1440	1	0	1	0	0
chr1	150877663	150891318	merge.DEL.1441	1	1	1	1	0
chr1	150905247	150924911	merge.DEL.1442	1	1	1	1	0
chr1	150987529	150995106	merge.DEL.1443	1	1	1	1	0
chr1	151010864	151027085	merge.DEL.1444	1	1	1	1	0
chr1	151036332	151045312	merge.DEL.1445	1	0	1	1	0
chr1	151062608	151069965	merge.DEL.1446	1	1	1	1	0
chr1	151072482	151089977	merge.DEL.1447	1	1	1	1	0
chr1	151099496	151123820	merge.DEL.1448	1	1	1	1	0
chr1	151149093	151154279	merge.DEL.1449	1	1	1	1	0
chr1	151168925	151188870	merge.DEL.1450	1	1	1	0	0
chr1	151190751	151196994	merge.DEL.1451	1	1	1	1	0
chr1	151201003	151214993	merge.DEL.1452	1	1	1	1	0
chr1	151216301	151235381	merge.DEL.1453	1	0	1	1	0
chr1	151269503	151278339	merge.DEL.1454	1	1	0	1	0
chr1	151280315	151280449	merge.DEL.1455	1	1	1	1	0
chr1	151315230	151325294	merge.DEL.1456	1	1	1	1	0
chr1	151329478	151339540	merge.DEL.1457	1	1	1	1	0
chr1	151350998	151360558	merge.DEL.1458	0	1	1	1	0
chr1	151388613	151396367	merge.DEL.1459	1	0	1	1	0
chr1	151446488	151454839	merge.DEL.1460	1	1	1	1	0
chr1	151461285	151469935	merge.DEL.1461	1	1	1	1	0
chr1	151485233	151490559	merge.DEL.1462	1	1	1	1	0
chr1	151493002	151509750	merge.DEL.1463	1	1	0	1	0
chr1	151599276	151599604	merge.DEL.1464	1	1	1	1	1
chr1	151600464	151600515	merge.DEL.1465	1	0	1	1	0
chr1	151600739	151600865	merge.DEL.1466	1	1	1	1	1
chr1	151600902	151600947	merge.DEL.1467	1	0	1	1	0
chr1	151676271	151676308	merge.DEL.1468	1	1	1	1	1
chr1	151723430	151727019	merge.DEL.1469	1	1	1	1	0
chr1	151847215	151847330	merge.DEL.1470	1	1	1	1	1
chr1	151932732	151932856	merge.DEL.1471	1	1	1	1	1
chr1	152111930	152112107	merge.DEL.1472	1	1	1	1	1
chr1	152214730	152215525	merge.DEL.1473	1	1	1	1	0
chr1	152216133	152216932	merge.DEL.1474	1	1	1	1	0
chr1	152217550	152218298	merge.DEL.1475	1	1	1	1	0
chr1	152218879	152219595	merge.DEL.1476	1	1	1	1	1
chr1	152267959	152268071	merge.DEL.1477	1	1	1	1	1
chr1	152418248	152418292	merge.DEL.1478	1	1	1	1	1
chr1	152583065	152615264	merge.DEL.1479	1	1	1	1	1
chr1	152798006	152812751	merge.DEL.1480	1	1	1	1	0
chr1	153161231	153161488	merge.DEL.1481	1	1	1	1	1
chr1	153243302	153243954	merge.DEL.1482	1	1	1	1	1
chr1	153618398	153621448	merge.DEL.1483	1	1	1	0	0
chr1	153637542	153640665	merge.DEL.1484	1	1	1	1	0
chr1	153650897	153657388	merge.DEL.1485	1	1	1	1	0
chr1	153664804	153669725	merge.DEL.1486	1	1	1	1	0
chr1	153677327	153696729	merge.DEL.1487	1	0	1	1	0
chr1	153700355	153727474	merge.DEL.1488	1	1	1	1	0
chr1	153894691	153900379	merge.DEL.1489	1	1	1	1	0
chr1	153924278	153932050	merge.DEL.1490	1	0	1	1	0
chr1	153964798	153965393	merge.DEL.1491	1	1	1	1	0
chr1	153965734	153975400	merge.DEL.1492	1	1	1	1	0
chr1	153987242	153989501	merge.DEL.1493	1	1	1	1	0
chr1	153989718	154014055	merge.DEL.1494	1	1	1	1	0
chr1	154019809	154035140	merge.DEL.1495	1	1	1	0	0
chr1	154142104	154156143	merge.DEL.1496	1	1	1	1	0
chr1	154174062	154176011	merge.DEL.1497	1	1	1	1	0
chr1	154181659	154185466	merge.DEL.1498	1	0	1	1	0
chr1	154211115	154217109	merge.DEL.1499	1	1	1	1	0
chr1	154290627	154304276	merge.DEL.1500	1	1	1	1	0
chr1	154311446	154320289	merge.DEL.1501	1	0	0	1	0
chr1	154346983	154350185	merge.DEL.1502	1	1	1	1	0
chr1	154355174	154370948	merge.DEL.1503	1	1	1	1	0
chr1	154375208	154383835	merge.DEL.1504	1	1	1	1	1
chr1	154387556	154392423	merge.DEL.1505	1	1	1	1	0
chr1	154432655	154439611	merge.DEL.1506	1	1	1	1	0
chr1	154447371	154449445	merge.DEL.1507	1	1	1	1	0
chr1	154451256	154452943	merge.DEL.1508	1	0	0	1	0
chr1	154470860	154477912	merge.DEL.1509	0	1	1	1	0
chr1	154522956	154527195	merge.DEL.1510	1	0	1	1	0
chr1	154684264	154686308	merge.DEL.1511	0	1	1	1	0
chr1	154977245	154977380	merge.DEL.1512	1	0	1	1	0
chr1	154979902	154982384	merge.DEL.1513	1	1	1	1	0
chr1	154984673	154998974	merge.DEL.1514	1	1	1	1	0
chr1	155027068	155027815	merge.DEL.1515	1	1	1	0	0
chr1	155096713	155106510	merge.DEL.1516	1	1	1	1	0
chr1	155119506	155124379	merge.DEL.1517	1	1	1	1	0
chr1	155136757	155148976	merge.DEL.1518	1	1	1	1	0
chr1	155154200	155161853	merge.DEL.1519	1	1	1	1	0
chr1	155188760	155189393	merge.DEL.1520	1	1	1	1	1
chr1	155189469	155191823	merge.DEL.1521	1	1	1	1	1
chr1	155245735	155259432	merge.DEL.1522	1	1	1	1	0
chr1	155265487	155274537	merge.DEL.1523	1	1	1	1	0
chr1	155281180	155298751	merge.DEL.1524	1	0	1	0	0
chr1	155303786	155308224	merge.DEL.1525	1	0	1	1	0
chr1	155311929	155316748	merge.DEL.1526	1	1	1	1	0
chr1	155377760	155387263	merge.DEL.1527	0	0	1	1	0
chr1	155507295	155512432	merge.DEL.1528	1	0	1	1	0
chr1	155549646	155559335	merge.DEL.1529	1	1	1	1	0
chr1	155564393	155571784	merge.DEL.1530	1	1	1	1	0
chr1	155572004	155587945	merge.DEL.1531	1	1	1	1	0
chr1	155593162	155609089	merge.DEL.1532	1	1	1	1	0
chr1	155637774	155641372	merge.DEL.1533	1	1	1	1	0
chr1	155681153	155686348	merge.DEL.1534	1	1	1	0	0
chr1	155689642	155693690	merge.DEL.1535	0	1	1	0	0
chr1	155700761	155700839	merge.DEL.1536	1	1	1	0	0
chr1	155700885	155700975	merge.DEL.1537	1	1	1	0	0
chr1	155702309	155704971	merge.DEL.1538	1	0	1	1	0
chr1	155705336	155711232	merge.DEL.1539	0	1	1	1	0
chr1	155732765	155741507	merge.DEL.1540	1	0	1	1	0
chr1	155780063	155791200	merge.DEL.1541	1	1	1	0	0
chr1	155851366	155855998	merge.DEL.1542	1	1	1	0	0
chr1	155863411	155866405	merge.DEL.1543	1	1	1	1	0
chr1	155874232	155895136	merge.DEL.1544	1	1	1	1	0
chr1	155919726	155932986	merge.DEL.1545	1	1	1	1	0
chr1	155937925	155939807	merge.DEL.1546	1	1	1	1	0
chr1	155985773	155987489	merge.DEL.1547	1	1	1	1	0
chr1	155995381	156000963	merge.DEL.1548	1	1	1	1	0
chr1	156016381	156021748	merge.DEL.1549	0	1	1	1	0
chr1	156021804	156047808	merge.DEL.1550	1	1	1	1	0
chr1	156057068	156068936	merge.DEL.1551	1	1	1	0	0
chr1	156088161	156093178	merge.DEL.1552	1	1	1	1	0
chr1	156131326	156133470	merge.DEL.1553	1	1	1	1	0
chr1	156162275	156184040	merge.DEL.1554	1	1	1	1	0
chr1	156195231	156208226	merge.DEL.1555	1	1	1	1	0
chr1	156215166	156225122	merge.DEL.1556	1	1	1	1	0
chr1	156228021	156235622	merge.DEL.1557	1	1	1	0	0
chr1	156240432	156240667	merge.DEL.1558	1	1	1	1	1
chr1	156254829	156255413	merge.DEL.1559	1	1	1	1	0
chr1	156287016	156290575	merge.DEL.1560	1	1	1	0	0
chr1	156296508	156306413	merge.DEL.1561	1	1	1	1	0
chr1	156317981	156326556	merge.DEL.1562	1	1	1	0	0
chr1	156328035	156328076	merge.DEL.1563	1	1	1	1	0
chr1	156330392	156333041	merge.DEL.1564	1	0	1	1	0
chr1	156339110	156356214	merge.DEL.1565	1	1	1	1	0
chr1	156395407	156398031	merge.DEL.1566	0	1	1	1	0
chr1	156447910	156447958	merge.DEL.1567	1	1	1	0	0
chr1	156555511	156561452	merge.DEL.1568	1	1	1	1	1
chr1	156573547	156578849	merge.DEL.1569	1	1	1	0	0
chr1	156627091	156632808	merge.DEL.1570	1	1	1	1	0
chr1	156684070	156702871	merge.DEL.1571	1	1	1	1	0
chr1	156716185	156718413	merge.DEL.1572	1	1	1	1	0
chr1	156729467	156731197	merge.DEL.1573	1	1	1	1	0
chr1	156753611	156765577	merge.DEL.1574	1	1	1	1	0
chr1	156774364	156779054	merge.DEL.1575	1	0	1	0	0
chr1	156787445	156787516	merge.DEL.1576	1	1	1	1	0
chr1	156836724	156836840	merge.DEL.1577	1	1	1	1	1
chr1	156857161	156857216	merge.DEL.1578	1	0	1	1	0
chr1	157035764	157036009	merge.DEL.1579	1	1	1	1	1
chr1	157284475	157284531	merge.DEL.1580	1	1	1	1	1
chr1	157967760	157967855	merge.DEL.1581	1	1	1	1	1
chr1	158518618	158518886	merge.DEL.1582	1	1	1	1	1
chr1	158659582	158659920	merge.DEL.1583	1	1	1	1	1
chr1	158742242	158742572	merge.DEL.1584	1	1	1	1	1
chr1	158881863	158881977	merge.DEL.1585	1	1	1	1	1
chr1	158897729	158900196	merge.DEL.1586	1	1	1	1	1
chr1	158901428	158901480	merge.DEL.1587	1	1	1	1	1
chr1	159493414	159493465	merge.DEL.1588	1	1	1	1	1
chr1	159678918	159679870	merge.DEL.1589	1	1	1	1	1
chr1	159787909	159789580	merge.DEL.1590	0	1	1	1	0
chr1	159976926	159977023	merge.DEL.1591	1	1	1	1	1
chr1	160184427	160185799	merge.DEL.1592	0	0	1	1	0
chr1	160714272	160714717	merge.DEL.1593	1	1	1	1	1
chr1	160780080	160780224	merge.DEL.1594	1	1	1	1	1
chr1	160958289	160968365	merge.DEL.1595	1	1	1	1	1
chr1	160973377	160978533	merge.DEL.1596	1	1	1	1	1
chr1	160984567	160984757	merge.DEL.1597	1	1	1	1	1
chr1	160989703	160995487	merge.DEL.1598	1	1	1	0	0
chr1	160998170	161007415	merge.DEL.1599	1	1	1	1	0
chr1	161029876	161029915	merge.DEL.1600	1	1	1	1	0
chr1	161055787	161055942	merge.DEL.1601	1	1	1	1	1
chr1	161057753	161070706	merge.DEL.1602	1	1	1	1	0
chr1	161101451	161115347	merge.DEL.1603	1	1	1	1	0
chr1	161123614	161126387	merge.DEL.1604	1	0	1	1	0
chr1	161134481	161150677	merge.DEL.1605	1	1	1	1	0
chr1	161178917	161189001	merge.DEL.1606	1	1	1	1	0
chr1	161235100	161235338	merge.DEL.1607	1	1	0	1	0
chr1	161239170	161239534	merge.DEL.1608	1	0	1	1	0
chr1	161321058	161329192	merge.DEL.1609	1	0	0	1	0
chr1	161369148	161378605	merge.DEL.1610	1	1	0	1	0
chr1	161384997	161387036	merge.DEL.1611	1	1	0	0	0
chr1	161391974	161398847	merge.DEL.1612	1	1	0	1	0
chr1	161411208	161418471	merge.DEL.1613	1	1	1	1	1
chr1	161423469	161423780	merge.DEL.1614	1	1	1	1	1
chr1	161457617	161457726	merge.DEL.1615	1	1	1	1	1
chr1	161579288	161579491	merge.DEL.1616	1	1	1	1	1
chr1	161617341	161617418	merge.DEL.1617	1	1	1	1	0
chr1	161649058	161649507	merge.DEL.1618	1	1	1	0	0
chr1	161661208	161661264	merge.DEL.1619	1	1	1	0	0
chr1	162082875	162083215	merge.DEL.1620	1	1	1	1	1
chr1	162408458	162409088	merge.DEL.1621	1	1	1	1	0
chr1	162460988	162462697	merge.DEL.1622	1	1	0	1	0
chr1	162531669	162556070	merge.DEL.1623	1	0	1	1	0
chr1	162829926	162842255	merge.DEL.1624	0	1	0	1	0
chr1	163037510	163037653	merge.DEL.1625	1	1	1	1	1
chr1	163037794	163037870	merge.DEL.1626	1	1	1	1	1
chr1	163374113	163374175	merge.DEL.1627	1	1	1	1	1
chr1	163812454	163812525	merge.DEL.1628	1	1	1	1	1
chr1	164206886	164207062	merge.DEL.1629	1	1	1	1	1
chr1	164571594	164571624	merge.DEL.1630	1	1	1	1	1
chr1	164875974	164876018	merge.DEL.1631	1	1	1	1	1
chr1	164881304	164881433	merge.DEL.1632	1	1	1	1	1
chr1	165020456	165020541	merge.DEL.1633	1	1	1	1	1
chr1	165582868	165583228	merge.DEL.1634	0	1	1	1	0
chr1	165689950	165690068	merge.DEL.1635	1	1	1	1	0
chr1	165750415	165753240	merge.DEL.1636	1	1	1	0	0
chr1	165761971	165762296	merge.DEL.1637	1	1	1	1	1
chr1	166046707	166046783	merge.DEL.1638	1	0	1	1	0
chr1	166077838	166078023	merge.DEL.1639	1	1	1	1	1
chr1	167102933	167102996	merge.DEL.1640	1	1	1	1	1
chr1	167343619	167343691	merge.DEL.1641	1	1	1	1	1
chr1	167445029	167450822	merge.DEL.1642	1	1	1	1	0
chr1	167506203	167506310	merge.DEL.1643	1	1	1	1	1
chr1	167613454	167613500	merge.DEL.1644	1	1	1	1	1
chr1	167725754	167738231	merge.DEL.1645	1	1	1	1	0
chr1	167793527	167803134	merge.DEL.1646	1	1	1	1	0
chr1	167814869	167819726	merge.DEL.1647	1	0	1	1	0
chr1	167897534	167897575	merge.DEL.1648	1	1	1	1	1
chr1	167931185	167933475	merge.DEL.1649	1	1	1	0	0
chr1	168140215	168143008	merge.DEL.1650	1	1	1	1	0
chr1	168169462	168177535	merge.DEL.1651	1	1	1	1	0
chr1	168210101	168221949	merge.DEL.1652	1	0	1	1	0
chr1	168327834	168339505	merge.DEL.1653	1	0	1	1	0
chr1	168457771	168457882	merge.DEL.1654	1	1	1	1	1
chr1	169028866	169028941	merge.DEL.1655	1	1	1	1	1
chr1	169055481	169055674	merge.DEL.1656	1	1	1	1	1
chr1	169114131	169114185	merge.DEL.1657	1	1	1	0	1
chr1	169182301	169191130	merge.DEL.1658	1	1	1	1	1
chr1	169342569	169342998	merge.DEL.1659	1	1	1	1	1
chr1	169354962	169355017	merge.DEL.1660	0	1	1	0	0
chr1	169471469	169471706	merge.DEL.1661	1	1	1	1	0
chr1	169502677	169502858	merge.DEL.1662	1	1	1	1	1
chr1	169671327	169671474	merge.DEL.1663	1	1	1	1	1
chr1	169850980	169851052	merge.DEL.1664	1	1	1	1	1
chr1	169880374	169880621	merge.DEL.1665	1	1	1	1	1
chr1	171210717	171210957	merge.DEL.1666	1	1	1	1	1
chr1	171220984	171221099	merge.DEL.1667	1	1	1	1	1
chr1	171479590	171483839	merge.DEL.1668	1	0	1	1	0
chr1	171487998	171488064	merge.DEL.1669	1	1	1	1	1
chr1	171635097	171659404	merge.DEL.1670	1	1	1	1	0
chr1	171814448	171814513	merge.DEL.1671	1	1	1	1	1
chr1	172571919	172571969	merge.DEL.1672	0	1	1	1	0
chr1	173376566	173376627	merge.DEL.1673	0	1	0	1	0
chr1	173376895	173377000	merge.DEL.1674	0	1	0	1	1
chr1	173378311	173378396	merge.DEL.1675	0	1	1	1	1
chr1	173378676	173378901	merge.DEL.1676	1	1	1	1	1
chr1	173379346	173379397	merge.DEL.1677	1	1	1	1	1
chr1	173380410	173380628	merge.DEL.1678	1	1	1	1	1
chr1	173718268	173718876	merge.DEL.1679	1	1	1	0	0
chr1	173958565	173994044	merge.DEL.1680	1	1	1	0	0
chr1	174524756	174524795	merge.DEL.1681	1	1	1	1	1
chr1	175059720	175059832	merge.DEL.1682	1	1	1	1	1
chr1	175099558	175099638	merge.DEL.1683	1	1	1	1	1
chr1	175101813	175109034	merge.DEL.1684	1	1	1	1	1
chr1	175109340	175124627	merge.DEL.1685	1	1	1	1	1
chr1	175231289	175231334	merge.DEL.1686	1	1	1	1	0
chr1	175312604	175312642	merge.DEL.1687	0	1	1	1	0
chr1	175426784	175426944	merge.DEL.1688	1	1	1	1	1
chr1	175547548	175547675	merge.DEL.1689	1	1	1	1	1
chr1	175651046	175651118	merge.DEL.1690	1	1	1	1	0
chr1	176057981	176058057	merge.DEL.1691	1	1	1	1	1
chr1	176132635	176133089	merge.DEL.1692	1	1	1	1	1
chr1	176300883	176300993	merge.DEL.1693	1	1	1	1	1
chr1	176396266	176396373	merge.DEL.1694	1	1	1	1	1
chr1	176509082	176509638	merge.DEL.1695	1	1	1	1	1
chr1	177549992	177550034	merge.DEL.1696	1	1	1	1	0
chr1	177573596	177573641	merge.DEL.1697	1	1	1	1	0
chr1	177603001	177603062	merge.DEL.1698	1	1	1	1	1
chr1	178046112	178046143	merge.DEL.1699	1	1	1	1	0
chr1	178505583	178505855	merge.DEL.1700	1	1	1	1	1
chr1	178526150	178526506	merge.DEL.1701	1	1	1	1	1
chr1	178680383	178680466	merge.DEL.1702	0	1	1	1	0
chr1	178712662	178712720	merge.DEL.1703	1	1	1	1	1
chr1	179040427	179040590	merge.DEL.1704	1	1	1	1	1
chr1	179061318	179080680	merge.DEL.1705	1	1	1	1	0
chr1	179135418	179135504	merge.DEL.1706	1	1	1	1	1
chr1	179232412	179239932	merge.DEL.1707	1	1	1	1	0
chr1	179280538	179292100	merge.DEL.1708	1	1	1	1	0
chr1	179296056	179297571	merge.DEL.1709	1	1	1	1	0
chr1	179836961	179837042	merge.DEL.1710	1	1	1	1	1
chr1	179889913	179894577	merge.DEL.1711	1	1	1	0	0
chr1	179907575	179907629	merge.DEL.1712	1	1	1	1	1
chr1	180118739	180126035	merge.DEL.1713	1	0	1	1	0
chr1	180146070	180149351	merge.DEL.1714	1	0	0	1	0
chr1	180214696	180215035	merge.DEL.1715	1	1	1	1	1
chr1	180323854	180324191	merge.DEL.1716	1	1	1	1	1
chr1	180659225	180659265	merge.DEL.1717	0	1	1	1	0
chr1	180678925	180681639	merge.DEL.1718	1	1	1	1	0
chr1	180714342	180714406	merge.DEL.1719	1	1	1	0	0
chr1	180869402	180869699	merge.DEL.1720	1	1	1	1	1
chr1	180874181	180881452	merge.DEL.1721	1	0	0	1	0
chr1	181016816	181017137	merge.DEL.1722	1	1	1	1	0
chr1	181026958	181032214	merge.DEL.1723	1	1	1	1	0
chr1	181039107	181044264	merge.DEL.1724	1	0	1	0	0
chr1	181065186	181074826	merge.DEL.1725	1	1	1	1	0
chr1	181092544	181093894	merge.DEL.1726	1	1	1	1	0
chr1	181136772	181136855	merge.DEL.1727	1	1	1	0	0
chr1	181246694	181246745	merge.DEL.1728	1	1	1	0	0
chr1	181892804	181892842	merge.DEL.1729	1	1	1	1	1
chr1	182118714	182118805	merge.DEL.1730	1	1	1	1	1
chr1	182256937	182267505	merge.DEL.1731	1	1	1	1	0
chr1	182316596	182316654	merge.DEL.1732	1	1	1	1	1
chr1	182319170	182324751	merge.DEL.1733	1	1	1	1	1
chr1	182509304	182509471	merge.DEL.1734	1	1	1	1	1
chr1	182705539	182705731	merge.DEL.1735	1	1	1	1	1
chr1	182720914	182721098	merge.DEL.1736	1	1	1	1	1
chr1	182750760	182750844	merge.DEL.1737	1	1	1	1	1
chr1	182927051	182927117	merge.DEL.1738	1	1	1	1	1
chr1	183156622	183156659	merge.DEL.1739	1	1	1	1	1
chr1	183382880	183383330	merge.DEL.1740	0	1	1	1	0
chr1	183427266	183427341	merge.DEL.1741	1	1	1	1	1
chr1	183568457	183588489	merge.DEL.1742	1	1	1	1	0
chr1	183614108	183614678	merge.DEL.1743	1	1	1	1	1
chr1	184345713	184345749	merge.DEL.1744	1	1	1	1	0
chr1	184751088	184751133	merge.DEL.1745	1	1	1	1	1
chr1	184799721	184800058	merge.DEL.1746	1	1	1	1	1
chr1	184845595	184851667	merge.DEL.1747	1	1	1	1	1
chr1	184967903	184968243	merge.DEL.1748	1	1	1	1	1
chr1	185013873	185044109	merge.DEL.1749	1	1	1	1	0
chr1	185505131	185505163	merge.DEL.1750	1	1	1	1	1
chr1	185665075	185665128	merge.DEL.1751	1	1	1	1	1
chr1	185726046	185726089	merge.DEL.1752	1	1	1	1	1
chr1	186005134	186005378	merge.DEL.1753	1	1	1	1	1
chr1	186086786	186086835	merge.DEL.1754	1	1	1	1	1
chr1	186795381	186796368	merge.DEL.1755	1	1	1	1	1
chr1	187054116	187054230	merge.DEL.1756	1	1	1	1	1
chr1	187146687	187146806	merge.DEL.1757	1	1	1	1	1
chr1	187495695	187497593	merge.DEL.1758	1	1	1	1	1
chr1	187746971	187753405	merge.DEL.1759	1	1	1	1	1
chr1	188180693	188180797	merge.DEL.1760	1	1	1	1	1
chr1	188544185	188544216	merge.DEL.1761	1	1	1	1	0
chr1	188570324	188571103	merge.DEL.1762	1	1	1	1	1
chr1	188795695	188798002	merge.DEL.1763	0	1	1	0	0
chr1	188848054	188848179	merge.DEL.1764	1	1	1	1	1
chr1	189018292	189026165	merge.DEL.1765	1	1	1	1	1
chr1	189035124	189035166	merge.DEL.1766	0	1	1	1	1
chr1	189063838	189063918	merge.DEL.1767	1	1	1	1	1
chr1	189562608	189562668	merge.DEL.1768	1	1	1	1	0
chr1	189692511	189692637	merge.DEL.1769	1	1	1	1	1
chr1	189798818	189798871	merge.DEL.1770	1	1	1	1	1
chr1	189818315	189818476	merge.DEL.1771	1	1	1	1	1
chr1	189992190	189992251	merge.DEL.1772	1	1	1	1	1
chr1	190542321	190542397	merge.DEL.1773	1	1	1	1	1
chr1	190628841	190628971	merge.DEL.1774	1	1	1	1	1
chr1	190694907	190694979	merge.DEL.1775	1	1	1	1	1
chr1	190783381	190783424	merge.DEL.1776	1	1	1	1	1
chr1	190868188	190868361	merge.DEL.1777	1	1	1	1	1
chr1	191576845	191576917	merge.DEL.1778	1	1	1	1	1
chr1	191825077	191825109	merge.DEL.1779	1	1	1	1	0
chr1	191828442	191828506	merge.DEL.1780	1	1	1	1	0
chr1	192640663	192640740	merge.DEL.1781	1	1	1	1	1
chr1	192795867	192795924	merge.DEL.1782	1	1	1	1	1
chr1	192895842	192895922	merge.DEL.1783	1	1	1	1	1
chr1	193061971	193067215	merge.DEL.1784	1	0	1	1	0
chr1	193095158	193095669	merge.DEL.1785	1	1	1	1	0
chr1	193107652	193116791	merge.DEL.1786	1	1	1	1	0
chr1	193266299	193266532	merge.DEL.1787	1	1	1	1	1
chr1	193381676	193381730	merge.DEL.1788	1	1	1	1	1
chr1	193832944	193833010	merge.DEL.1789	1	1	1	1	0
chr1	194090950	194091113	merge.DEL.1790	1	1	1	1	1
chr1	194481582	194481727	merge.DEL.1791	0	1	1	0	0
chr1	194482022	194485184	merge.DEL.1792	0	1	0	0	1
chr1	194548457	194548740	merge.DEL.1793	1	1	1	1	1
chr1	195497805	195497858	merge.DEL.1794	1	1	1	0	1
chr1	195543316	195543356	merge.DEL.1795	0	1	1	0	1
chr1	195571933	195572066	merge.DEL.1796	1	1	1	1	0
chr1	196188917	196189209	merge.DEL.1797	1	1	1	1	1
chr1	196293618	196293679	merge.DEL.1798	1	1	1	1	1
chr1	196578162	196578247	merge.DEL.1799	1	1	1	1	1
chr1	197453902	197453990	merge.DEL.1800	1	1	1	1	1
chr1	197531379	197534155	merge.DEL.1801	1	1	1	1	1
chr1	198061015	198061063	merge.DEL.1802	0	1	1	1	0
chr1	198835153	198835222	merge.DEL.1803	1	1	1	1	1
chr1	199160978	199161009	merge.DEL.1804	1	1	1	1	1
chr1	199469598	199471124	merge.DEL.1805	1	1	1	1	1
chr1	199478462	199478680	merge.DEL.1806	1	1	1	1	1
chr1	199478796	199478896	merge.DEL.1807	1	1	1	1	0
chr1	199478935	199478984	merge.DEL.1808	1	1	1	1	0
chr1	199562589	199562678	merge.DEL.1809	1	1	1	1	1
chr1	199988654	199999348	merge.DEL.1810	1	1	1	1	0
chr1	200003989	200011559	merge.DEL.1811	1	0	1	1	0
chr1	200130273	200130324	merge.DEL.1812	1	1	1	1	1
chr1	200284032	200289104	merge.DEL.1813	1	1	0	1	0
chr1	200487857	200487907	merge.DEL.1814	0	0	1	1	0
chr1	200499614	200538872	merge.DEL.1815	1	1	1	1	0
chr1	200567550	200578831	merge.DEL.1816	1	0	1	0	0
chr1	200623734	200636558	merge.DEL.1817	1	1	1	0	0
chr1	200746671	200747946	merge.DEL.1818	1	0	1	1	0
chr1	200879140	200890202	merge.DEL.1819	1	0	0	1	0
chr1	200911043	200911173	merge.DEL.1820	1	1	1	1	1
chr1	201111925	201112008	merge.DEL.1821	1	0	0	1	0
chr1	201209752	201210257	merge.DEL.1822	1	1	1	1	0
chr1	201210865	201211223	merge.DEL.1823	1	0	0	1	0
chr1	201256949	201257114	merge.DEL.1824	0	1	1	1	0
chr1	201257167	201257309	merge.DEL.1825	0	1	1	1	0
chr1	201257457	201257525	merge.DEL.1826	0	1	1	1	0
chr1	201257536	201257950	merge.DEL.1827	1	1	1	1	0
chr1	201258061	201258247	merge.DEL.1828	1	0	1	1	0
chr1	201258326	201258370	merge.DEL.1829	1	0	1	1	0
chr1	201516721	201516836	merge.DEL.1830	1	1	1	1	1
chr1	201519073	201530342	merge.DEL.1831	1	1	1	1	0
chr1	201756780	201756895	merge.DEL.1832	1	1	1	1	1
chr1	201821506	201823405	merge.DEL.1833	1	1	1	1	0
chr1	201865891	201873680	merge.DEL.1834	1	1	0	1	0
chr1	201901358	201904351	merge.DEL.1835	1	1	1	1	1
chr1	201919456	201924352	merge.DEL.1836	1	0	1	1	0
chr1	201927155	201938427	merge.DEL.1837	1	1	1	1	0
chr1	201947174	201947223	merge.DEL.1838	0	1	0	1	0
chr1	201959555	201980630	merge.DEL.1839	1	1	1	1	1
chr1	201984184	201996793	merge.DEL.1840	1	1	1	0	0
chr1	201997954	202002353	merge.DEL.1841	1	0	1	1	0
chr1	202017738	202024611	merge.DEL.1842	0	1	0	1	0
chr1	202032509	202032706	merge.DEL.1843	1	1	1	1	1
chr1	202038707	202049958	merge.DEL.1844	1	1	1	1	0
chr1	202060605	202069279	merge.DEL.1845	1	0	1	1	0
chr1	202069449	202084242	merge.DEL.1846	1	1	1	1	0
chr1	202089384	202098635	merge.DEL.1847	1	0	1	1	0
chr1	202099673	202105372	merge.DEL.1848	1	1	1	1	0
chr1	202110353	202118681	merge.DEL.1849	1	1	1	1	0
chr1	202129257	202142057	merge.DEL.1850	1	1	1	1	0
chr1	202172350	202172385	merge.DEL.1851	1	1	1	0	0
chr1	202186198	202186249	merge.DEL.1852	1	1	1	0	0
chr1	202204731	202205416	merge.DEL.1853	1	1	1	1	0
chr1	202205552	202205736	merge.DEL.1854	1	1	1	1	0
chr1	202238678	202244215	merge.DEL.1855	1	1	0	1	0
chr1	202332908	202341610	merge.DEL.1856	1	1	1	1	1
chr1	202358620	202359217	merge.DEL.1857	1	1	1	0	0
chr1	202391561	202392154	merge.DEL.1858	1	1	1	1	1
chr1	202458064	202458573	merge.DEL.1859	1	1	1	1	1
chr1	202533122	202549703	merge.DEL.1860	1	0	1	0	0
chr1	202640725	202640795	merge.DEL.1861	0	1	1	1	0
chr1	202720251	202721456	merge.DEL.1862	1	1	1	1	0
chr1	202766520	202780276	merge.DEL.1863	1	0	0	0	0
chr1	202799381	202804737	merge.DEL.1864	1	1	1	1	0
chr1	202813958	202824077	merge.DEL.1865	1	1	1	1	0
chr1	202828382	202833911	merge.DEL.1866	1	1	0	1	0
chr1	202838886	202841963	merge.DEL.1867	1	1	1	1	0
chr1	202935780	202940400	merge.DEL.1868	1	0	1	0	0
chr1	202946865	202949586	merge.DEL.1869	1	1	1	1	0
chr1	203319822	203337203	merge.DEL.1870	1	1	1	1	0
chr1	203373247	203373317	merge.DEL.1871	1	1	1	1	1
chr1	203531609	203536417	merge.DEL.1872	1	0	1	1	0
chr1	203540470	203545859	merge.DEL.1873	1	1	1	1	0
chr1	203755516	203761042	merge.DEL.1874	1	0	1	1	0
chr1	203777462	203795013	merge.DEL.1875	1	1	1	1	0
chr1	203830803	203849178	merge.DEL.1876	1	1	1	1	0
chr1	203859333	203860010	merge.DEL.1877	1	1	1	0	0
chr1	203958558	203965177	merge.DEL.1878	1	1	1	1	0
chr1	204012657	204012749	merge.DEL.1879	1	1	1	1	1
chr1	204195405	204195495	merge.DEL.1880	1	1	1	1	0
chr1	204208353	204208475	merge.DEL.1881	1	1	1	1	1
chr1	204234954	204235037	merge.DEL.1882	1	1	1	1	1
chr1	204360511	204361382	merge.DEL.1883	1	1	1	1	0
chr1	204471054	204471742	merge.DEL.1884	1	1	1	1	1
chr1	204507846	204526589	merge.DEL.1885	1	1	1	1	0
chr1	204877027	204877082	merge.DEL.1886	1	1	1	1	1
chr1	205048905	205050321	merge.DEL.1887	1	1	1	1	0
chr1	205123383	205139451	merge.DEL.1888	1	1	1	1	0
chr1	205185241	205208160	merge.DEL.1889	1	1	1	1	0
chr1	205209504	205209562	merge.DEL.1890	1	1	1	1	1
chr1	205214191	205223875	merge.DEL.1891	1	0	1	1	0
chr1	205274752	205282382	merge.DEL.1892	1	1	1	1	0
chr1	205289168	205295623	merge.DEL.1893	1	1	1	1	0
chr1	205322548	205341742	merge.DEL.1894	1	0	1	1	0
chr1	205382368	205395334	merge.DEL.1895	1	1	1	1	0
chr1	205462212	205487292	merge.DEL.1896	0	1	1	1	0
chr1	205550942	205550988	merge.DEL.1897	1	1	1	1	1
chr1	205562645	205565103	merge.DEL.1898	0	1	1	1	0
chr1	205621606	205629536	merge.DEL.1899	1	0	1	0	0
chr1	205682158	205687076	merge.DEL.1900	1	1	1	1	0
chr1	205725968	205746099	merge.DEL.1901	1	1	1	0	0
chr1	205753046	205761580	merge.DEL.1902	1	0	1	1	0
chr1	205779695	205803949	merge.DEL.1903	1	1	1	1	0
chr1	205884478	205884542	merge.DEL.1904	0	1	1	1	1
chr1	205957900	205958436	merge.DEL.1905	1	1	1	1	1
chr1	205966744	205967069	merge.DEL.1906	1	1	1	1	1
chr1	205981658	205981846	merge.DEL.1907	1	1	1	1	1
chr1	206038186	206038222	merge.DEL.1908	1	0	0	1	0
chr1	206372885	206373037	merge.DEL.1909	1	1	1	1	1
chr1	206613263	206618329	merge.DEL.1910	1	1	1	0	0
chr1	206660788	206662202	merge.DEL.1911	1	0	1	0	0
chr1	206743873	206743994	merge.DEL.1912	1	1	1	1	1
chr1	206781842	206782069	merge.DEL.1913	1	1	1	1	1
chr1	206924434	206924616	merge.DEL.1914	1	1	1	1	1
chr1	207119013	207119789	merge.DEL.1915	1	1	1	1	1
chr1	207315819	207315920	merge.DEL.1916	1	1	1	1	1
chr1	207368610	207372308	merge.DEL.1917	1	1	1	1	1
chr1	207617587	207617665	merge.DEL.1918	1	1	1	1	1
chr1	207623586	207623640	merge.DEL.1919	1	1	1	1	1
chr1	207846735	207846872	merge.DEL.1920	1	1	1	1	1
chr1	207874450	207881505	merge.DEL.1921	0	0	1	1	0
chr1	208265745	208265827	merge.DEL.1922	0	1	1	1	1
chr1	209004540	209016930	merge.DEL.1923	0	1	1	1	0
chr1	209765206	209765248	merge.DEL.1924	1	1	1	1	1
chr1	209816701	209816827	merge.DEL.1925	1	1	1	1	1
chr1	209904702	209912637	merge.DEL.1926	1	1	1	1	1
chr1	210121959	210122292	merge.DEL.1927	1	1	1	1	1
chr1	210428287	210428349	merge.DEL.1928	1	1	1	1	0
chr1	210465850	210466140	merge.DEL.1929	1	1	1	1	1
chr1	210533249	210533451	merge.DEL.1930	1	1	1	1	1
chr1	210654065	210654111	merge.DEL.1931	1	0	1	1	0
chr1	210733948	210735825	merge.DEL.1932	1	0	1	1	0
chr1	211213639	211213730	merge.DEL.1933	1	1	1	1	1
chr1	211236391	211257121	merge.DEL.1934	1	1	1	1	0
chr1	211265593	211270291	merge.DEL.1935	1	0	1	1	0
chr1	211433835	211433872	merge.DEL.1936	1	1	1	1	1
chr1	211452190	211452240	merge.DEL.1937	1	1	1	1	1
chr1	211460626	211460777	merge.DEL.1938	1	1	1	1	0
chr1	211504987	211510663	merge.DEL.1939	1	1	1	1	0
chr1	211584370	211586026	merge.DEL.1940	1	0	1	1	0
chr1	211676465	211678785	merge.DEL.1941	1	1	0	1	0
chr1	211679045	211680347	merge.DEL.1942	1	1	0	0	0
chr1	211846145	211846213	merge.DEL.1943	1	1	1	1	1
chr1	211903458	211903518	merge.DEL.1944	1	1	1	1	1
chr1	211998655	211998704	merge.DEL.1945	1	1	1	1	1
chr1	212116482	212116517	merge.DEL.1946	1	0	1	1	0
chr1	212145130	212151924	merge.DEL.1947	1	0	1	1	0
chr1	212190228	212190347	merge.DEL.1948	1	1	1	1	1
chr1	212222919	212240633	merge.DEL.1949	1	1	1	1	0
chr1	212297793	212299296	merge.DEL.1950	1	1	1	1	1
chr1	212439642	212440051	merge.DEL.1951	1	1	1	0	0
chr1	212468679	212468764	merge.DEL.1952	1	1	1	1	1
chr1	212536003	212538918	merge.DEL.1953	1	1	0	1	0
chr1	212706001	212716926	merge.DEL.1954	1	1	1	1	0
chr1	212745157	212745206	merge.DEL.1955	1	1	1	1	1
chr1	212822082	212840328	merge.DEL.1956	1	1	1	1	1
chr1	212865883	212866075	merge.DEL.1957	1	1	1	1	1
chr1	212891303	212891367	merge.DEL.1958	1	1	1	1	1
chr1	212910881	212912833	merge.DEL.1959	1	1	1	1	1
chr1	212914422	212914500	merge.DEL.1960	1	1	1	1	1
chr1	213119426	213119508	merge.DEL.1961	1	1	1	1	1
chr1	213363622	213363775	merge.DEL.1962	1	1	1	1	1
chr1	213491334	213498978	merge.DEL.1963	0	0	1	1	0
chr1	213566433	213566493	merge.DEL.1964	1	1	1	1	1
chr1	214436799	214436843	merge.DEL.1965	1	1	1	1	1
chr1	214569850	214569963	merge.DEL.1966	1	1	1	1	1
chr1	214596758	214597119	merge.DEL.1967	1	1	1	1	1
chr1	214598587	214600419	merge.DEL.1968	1	1	1	1	0
chr1	214616832	214616933	merge.DEL.1969	1	1	1	1	1
chr1	214679637	214679727	merge.DEL.1970	1	1	1	1	1
chr1	214705493	214705609	merge.DEL.1971	1	1	1	1	1
chr1	215021385	215021438	merge.DEL.1972	0	1	1	1	1
chr1	215093727	215093872	merge.DEL.1973	1	1	1	1	1
chr1	215372256	215372342	merge.DEL.1974	1	1	1	1	1
chr1	215912450	215912518	merge.DEL.1975	1	1	1	1	1
chr1	216011963	216012135	merge.DEL.1976	1	1	1	1	1
chr1	216912164	216912295	merge.DEL.1977	1	1	1	1	1
chr1	217323768	217323857	merge.DEL.1978	1	1	1	1	1
chr1	217404301	217404358	merge.DEL.1979	1	1	1	1	1
chr1	217523834	217523981	merge.DEL.1980	1	1	1	1	1
chr1	217524193	217524262	merge.DEL.1981	1	1	1	1	1
chr1	217580732	217581055	merge.DEL.1982	1	1	1	1	1
chr1	217744167	217744490	merge.DEL.1983	1	1	1	1	1
chr1	218009147	218015269	merge.DEL.1984	1	1	1	1	1
chr1	218071906	218071988	merge.DEL.1985	1	1	1	1	1
chr1	218072287	218073159	merge.DEL.1986	1	1	1	1	1
chr1	218308234	218314107	merge.DEL.1987	1	0	1	1	0
chr1	218461691	218461821	merge.DEL.1988	1	1	1	1	0
chr1	218511443	218514594	merge.DEL.1989	1	1	1	0	0
chr1	218612571	218612910	merge.DEL.1990	1	1	1	1	1
chr1	218616555	218616615	merge.DEL.1991	1	1	1	1	1
chr1	218721107	218721224	merge.DEL.1992	1	1	1	1	1
chr1	219544947	219544995	merge.DEL.1993	0	1	1	1	0
chr1	219545531	219545608	merge.DEL.1994	1	1	1	1	1
chr1	219596002	219596076	merge.DEL.1995	1	1	1	1	1
chr1	219749966	219750300	merge.DEL.1996	1	1	1	1	1
chr1	219852570	219852614	merge.DEL.1997	1	1	1	1	1
[truncated: 25,146 more rows]

## Sheet: Inversion
Table S7. Summary of inversions detected in K562 scNanoCT&ATAC-seq data.
				Supported by individual ATAC-histone dual-modal data
Chrom	Start	End	SVID	H3K27ac	H3K27me3	H3K4me3	H3K9me3	Supported by ONT WGS data
chr1	1660358	1731398	merge.INV.1	0	1	1	0	0
chr1	6394593	6403757	merge.INV.2	1	0	1	1	0
chr1	6717647	6719429	merge.INV.3	1	1	1	1	0
chr1	21196068	21209942	merge.INV.4	1	1	1	1	1
chr1	26636942	26651061	merge.INV.5	1	1	1	0	1
chr1	30405667	30405975	merge.INV.6	1	0	1	1	0
chr1	38905048	38916563	merge.INV.7	1	1	1	0	0
chr1	43593613	43594285	merge.INV.8	1	1	1	1	1
chr1	45709451	45710769	merge.INV.9	1	0	1	0	1
chr1	54799347	54807309	merge.INV.10	1	1	1	1	1
chr1	92794728	92815633	merge.INV.11	1	1	0	1	0
chr1	93876119	93883276	merge.INV.12	1	1	1	1	0
chr1	143211366	143242899	merge.INV.13	0	1	1	0	1
chr1	155397743	155407239	merge.INV.14	1	1	1	0	0
chr1	187495697	187497597	merge.INV.15	1	1	1	1	0
chr1	189473290	189481866	merge.INV.16	1	1	1	0	0
chr1	194669490	194669566	merge.INV.17	0	1	1	1	0
chr1	197787640	197788861	merge.INV.18	1	1	1	1	1
chr1	202112304	202126021	merge.INV.19	0	1	1	0	0
chr1	202813857	202823864	merge.INV.20	1	1	1	1	0
chr1	227384973	227404142	merge.INV.21	1	1	1	0	0
chr1	237402805	237402909	merge.INV.22	1	1	1	0	0
chr1	244376818	244393185	merge.INV.23	1	1	1	0	0
chr1	248519265	248537304	merge.INV.24	1	1	1	1	1
chr10	12823459	12826536	merge.INV.25	1	0	0	1	0
chr10	13062978	13063278	merge.INV.26	1	1	1	1	0
chr10	37102417	37113837	merge.INV.27	1	1	1	1	1
chr10	46283274	46285201	merge.INV.28	1	1	1	1	0
chr10	55007430	55013449	merge.INV.29	1	1	1	1	1
chr10	57497186	57498224	merge.INV.30	0	1	1	1	0
chr10	73659953	73660326	merge.INV.31	1	1	1	1	1
chr10	83898300	83919340	merge.INV.32	1	1	1	1	0
chr10	125501850	125508659	merge.INV.33	1	1	1	1	0
chr10	130837416	130840413	merge.INV.34	1	1	1	1	0
chr10	133670845	133760252	merge.INV.35	1	1	1	0	0
chr11	307492	323770	merge.INV.36	1	1	1	1	1
chr11	1894043	1940498	merge.INV.37	1	1	1	1	1
chr11	4276868	4346042	merge.INV.38	1	1	1	1	0
chr11	47371383	47373153	merge.INV.39	1	1	1	1	0
chr11	47427833	47428834	merge.INV.40	1	0	0	0	0
chr11	49711865	49731332	merge.INV.41	1	1	1	1	1
chr11	55597047	55690281	merge.INV.42	1	1	1	1	1
chr11	66251222	66252429	merge.INV.43	1	1	1	1	0
chr11	71519850	71563395	merge.INV.44	1	1	1	1	0
chr11	106272360	106273063	merge.INV.45	0	1	1	0	0
chr11	126632700	126632774	merge.INV.46	1	1	1	1	0
chr11	128868036	128868077	merge.INV.47	1	1	1	1	0
chr12	1067934	1068545	merge.INV.48	1	1	1	1	1
chr12	12391396	12394347	merge.INV.49	1	1	1	1	1
chr12	34719408	34822291	merge.INV.50	1	1	1	1	0
chr12	46896664	46915977	merge.INV.51	1	1	1	1	1
chr12	86845556	86860054	merge.INV.52	1	1	1	1	1
chr12	110178784	110180019	merge.INV.53	1	1	0	1	0
chr13	80895902	80896178	merge.INV.54	1	1	0	0	0
chr13	91821752	91823506	merge.INV.55	1	1	1	1	1
chr14	102562122	102562431	merge.INV.56	1	0	1	0	0
chr15	100067730	100072448	merge.INV.57	1	0	0	1	0
chr16	14894753	14937514	merge.INV.58	1	1	1	1	1
chr16	29226813	29227342	merge.INV.59	1	1	1	1	1
chr16	34067885	34099857	merge.INV.60	0	1	0	0	0
chr16	34571511	34589094	merge.INV.61	1	1	1	0	1
chr16	36311159	36337566	merge.INV.62	1	1	1	1	0
chr16	46380684	46401122	merge.INV.63	1	1	1	1	1
chr16	46689459	46751245	merge.INV.64	1	1	1	1	1
chr16	48616899	48617442	merge.INV.65	1	1	1	1	1
chr16	48871383	48872325	merge.INV.66	1	1	0	1	0
chr16	61021542	61049836	merge.INV.67	1	1	1	1	1
chr16	69727905	69728993	merge.INV.68	1	1	1	1	0
chr16	75204149	75226087	merge.INV.69	1	1	1	1	1
chr16	84705239	84709960	merge.INV.70	0	1	1	0	0
chr16	85013975	85023926	merge.INV.71	0	1	1	1	0
chr16	85155064	85156198	merge.INV.72	1	1	1	1	1
chr16	89043380	89069534	merge.INV.73	1	1	1	1	0
chr17	158804	160020	merge.INV.74	1	1	1	1	1
chr17	1219067	1222931	merge.INV.75	1	1	1	1	1
chr17	2310746	2322504	merge.INV.76	1	1	1	0	0
chr17	5982838	5983106	merge.INV.77	1	1	1	1	1
chr17	17829208	17833983	merge.INV.78	1	1	1	0	0
chr17	18191700	18202339	merge.INV.79	1	1	1	0	0
chr17	19065405	19245420	merge.INV.80	1	1	1	1	1
chr17	21795829	21825849	merge.INV.81	1	1	1	1	1
chr17	43232895	43324167	merge.INV.82	1	1	1	1	1
chr17	81833517	81901963	merge.INV.83	1	1	1	1	0
chr18	12145261	12148419	merge.INV.84	1	0	1	0	0
chr18	26974525	26977598	merge.INV.85	1	1	1	1	1
chr18	27509643	27511756	merge.INV.86	1	1	1	1	1
chr18	41981482	42007128	merge.INV.87	1	1	1	1	1
chr19	2952444	2967829	merge.INV.88	0	1	1	1	0
chr19	3127242	3128003	merge.INV.89	1	1	1	1	0
chr19	5690059	5720593	merge.INV.90	1	1	1	0	0
chr19	12682303	12705093	merge.INV.91	1	1	1	0	0
chr19	16057635	16057787	merge.INV.92	1	1	1	1	0
chr19	19017490	19031509	merge.INV.93	1	1	1	0	0
chr19	34246144	34248803	merge.INV.94	1	1	1	1	0
chr2	4157680	4175890	merge.INV.95	1	1	1	1	0
chr2	10685911	10687071	merge.INV.96	1	1	1	1	0
chr2	16225126	16226498	merge.INV.97	1	1	1	1	0
chr2	33539511	33542811	merge.INV.98	1	1	1	1	1
chr2	116216765	116224736	merge.INV.99	0	1	1	0	0
chr2	138246676	138251778	merge.INV.100	1	1	1	1	1
chr2	148583523	148585253	merge.INV.101	1	0	1	1	1
chr2	158332477	158362097	merge.INV.102	1	1	1	1	1
chr2	170951506	170972725	merge.INV.103	1	0	1	0	0
chr2	176508952	176521942	merge.INV.104	1	1	1	1	0
chr2	187824454	187838967	merge.INV.105	1	1	1	1	1
chr2	224428230	224429238	merge.INV.106	1	1	1	1	0
chr20	26160897	26164005	merge.INV.107	1	1	1	0	1
chr20	30811899	30898581	merge.INV.108	0	0	1	1	0
chr20	42576981	42667218	merge.INV.109	1	1	1	1	1
chr21	8231448	8234161	merge.INV.110	1	0	1	0	0
chr21	10269869	10366701	merge.INV.111	1	1	1	1	1
chr21	26001818	26002407	merge.INV.112	1	1	1	1	1
chr21	26648114	26649567	merge.INV.113	1	1	1	1	1
chr21	43262468	43337648	merge.INV.114	1	1	1	1	0
chr22	15934193	15940414	merge.INV.115	1	1	1	1	1
chr22	16243546	16245305	merge.INV.116	1	1	1	0	1
chr22	18132268	18149943	merge.INV.117	1	0	1	1	0
chr22	19487299	19501187	merge.INV.118	1	0	1	1	0
chr22	19778402	19792832	merge.INV.119	0	1	1	1	0
chr22	20074010	20079185	merge.INV.120	1	0	0	1	0
chr22	20498551	20506227	merge.INV.121	1	1	1	1	0
chr22	21088864	21097909	merge.INV.122	1	1	1	1	0
chr22	21552199	21565371	merge.INV.123	1	1	1	1	0
chr22	21581844	21608904	merge.INV.124	1	1	1	1	0
chr22	21966133	21981575	merge.INV.125	1	1	0	1	0
chr22	23939932	24008362	merge.INV.126	1	1	1	1	1
chr3	43793603	43794505	merge.INV.127	1	1	0	1	0
chr3	44698259	44701772	merge.INV.128	1	1	1	1	1
chr3	82152782	82154862	merge.INV.129	1	1	1	1	1
chr3	128627053	128658342	merge.INV.130	1	1	1	1	0
chr3	128661838	128680627	merge.INV.131	0	1	1	0	0
chr3	162807936	162829874	merge.INV.132	1	1	1	1	1
chr3	187413745	187424398	merge.INV.133	0	1	1	1	1
chr3	195668467	195681831	merge.INV.134	0	1	1	1	0
chr3	196000357	196000892	merge.INV.135	0	0	1	1	0
chr4	14835444	14836572	merge.INV.136	0	1	1	1	0
chr4	49708101	49754873	merge.INV.137	0	1	1	1	0
chr4	70079406	70092936	merge.INV.138	1	1	1	1	0
chr4	87926012	87937549	merge.INV.139	1	1	1	1	1
chr4	145693570	145694752	merge.INV.140	1	1	1	1	0
chr4	147610866	147707574	merge.INV.141	0	1	1	1	0
chr5	17485669	17648778	merge.INV.142	0	1	1	1	0
chr5	49575528	49667433	merge.INV.143	1	1	1	1	1
chr5	105538173	105550340	merge.INV.144	1	1	1	1	0
chr5	139482949	139498158	merge.INV.145	1	1	1	0	0
chr5	148173477	148175217	merge.INV.146	1	1	1	1	0
chr5	170170465	170171752	merge.INV.147	1	0	1	1	0
chr5	178132870	178145556	merge.INV.148	1	1	1	1	0
chr5	179626397	179663621	merge.INV.149	1	1	1	1	1
chr6	2998342	3066030	merge.INV.150	0	1	1	1	0
chr6	31041429	31042329	merge.INV.151	1	1	1	1	1
chr6	31807323	31815251	merge.INV.152	0	1	1	0	0
chr6	32479733	32582303	merge.INV.153	1	1	1	1	1
chr6	89213908	89214234	merge.INV.154	0	1	1	1	1
chr6	94031357	94031701	merge.INV.155	1	1	0	1	0
chr6	106720678	106723663	merge.INV.156	1	1	1	1	1
chr6	135426244	135456083	merge.INV.157	1	1	1	1	1
chr6	166997899	166997946	merge.INV.158	1	1	1	1	0
chr7	22830165	22851946	merge.INV.159	1	1	1	1	0
chr7	70955982	70973904	merge.INV.160	1	1	1	1	1
chr7	100948460	100976617	merge.INV.161	1	1	1	1	1
chr7	105520479	105521465	merge.INV.162	1	1	1	0	0
chr7	107418024	107423296	merge.INV.163	1	1	1	1	1
chr8	6296690	6303576	merge.INV.164	1	1	1	1	1
chr8	30361661	30363015	merge.INV.165	1	1	1	1	0
chr8	85664218	85750090	merge.INV.166	1	1	1	1	0
chr8	117861499	117863356	merge.INV.167	1	1	1	1	0
chr8	137117521	137119324	merge.INV.168	0	1	0	0	0
chr9	6378334	6387424	merge.INV.169	1	1	1	1	1
chr9	37081868	37091232	merge.INV.170	1	1	1	1	1
chr9	62805885	62822801	merge.INV.171	1	1	1	1	1
chr9	86539642	86541033	merge.INV.172	1	1	1	1	0
chr9	92394221	92395297	merge.INV.173	1	0	1	0	0
chr9	98035939	98055745	merge.INV.174	1	0	1	0	0
chr9	105054357	105055067	merge.INV.175	1	1	1	1	0
chr9	120805644	120872554	merge.INV.176	1	1	1	1	1
chr9	120884630	120908856	merge.INV.177	1	1	1	1	1
chr9	123976373	123993774	merge.INV.178	1	1	1	1	1
chr9	128145977	128147251	merge.INV.179	1	1	1	1	1
chr9	129423971	129425292	merge.INV.180	1	0	0	1	1
chr9	130753991	130764969	merge.INV.181	0	1	1	1	0
chr9	131102214	131124024	merge.INV.182	1	1	1	1	0
chrM	884	16157	merge.INV.183	1	1	1	1	1
chrY	11307205	11333944	merge.INV.184	1	1	1	1	0
chrY	56831002	56836646	merge.INV.185	1	1	1	1	1

## Sheet: Duplication
Table S8. Summary of duplications detected in K562 scNanoCT&ATAC-seq data.
				Supported by individual ATAC-histone dual-modal data
Chrom	Start	End	SVID	H3K27ac	H3K27me3	H3K4me3	H3K9me3	Supported by ONT WGS data
chr1	875830	876440	merge.DUP.1	1	0	1	1	1
chr1	976687	978247	merge.DUP.2	0	1	1	1	0
chr1	1075853	1079436	merge.DUP.3	1	1	0	1	0
chr1	1382221	1382909	merge.DUP.4	1	1	1	1	1
chr1	1427165	1427530	merge.DUP.5	1	1	1	0	1
chr1	1583942	1589771	merge.DUP.6	1	1	1	1	1
chr1	2121432	2124423	merge.DUP.7	1	0	0	1	0
chr1	2440391	2440735	merge.DUP.8	1	1	1	1	1
chr1	2522690	2523004	merge.DUP.9	1	1	1	1	0
chr1	2848786	2849746	merge.DUP.10	1	1	1	1	0
chr1	2859184	2859626	merge.DUP.11	1	0	0	1	0
chr1	3180841	3182040	merge.DUP.12	1	1	1	1	0
chr1	3501991	3502353	merge.DUP.13	1	1	1	1	1
chr1	3583262	3583948	merge.DUP.14	1	1	1	1	1
chr1	3693666	3695004	merge.DUP.15	1	1	1	1	0
chr1	4144325	4144925	merge.DUP.16	0	1	1	1	0
chr1	4632486	4633463	merge.DUP.17	1	1	1	1	0
chr1	4939302	4939808	merge.DUP.18	1	1	1	1	1
chr1	9411104	9411316	merge.DUP.19	1	1	1	1	1
chr1	9623937	9624201	merge.DUP.20	1	1	1	1	1
chr1	10744345	10744733	merge.DUP.21	1	0	0	1	0
chr1	10970865	10971097	merge.DUP.22	1	1	0	1	0
chr1	11373501	11374457	merge.DUP.23	0	0	0	1	0
chr1	11522524	11523001	merge.DUP.24	1	1	1	1	1
chr1	17289048	17289337	merge.DUP.25	1	0	1	1	1
chr1	18049211	18050009	merge.DUP.26	1	1	1	1	1
chr1	20623467	20624212	merge.DUP.27	1	1	1	0	0
chr1	22577760	22579523	merge.DUP.28	1	1	1	1	1
chr1	22754796	22754966	merge.DUP.29	0	1	0	1	0
chr1	23392225	23392822	merge.DUP.30	1	1	1	1	1
chr1	27107079	27107639	merge.DUP.31	1	1	1	1	0
chr1	27877321	27878487	merge.DUP.32	1	1	1	0	0
chr1	30649714	30651965	merge.DUP.33	1	1	1	1	0
chr1	31431745	31432234	merge.DUP.34	1	1	1	1	1
chr1	32109190	32116300	merge.DUP.35	1	1	1	1	1
chr1	32720303	32720720	merge.DUP.36	1	1	1	1	0
chr1	32728245	32730817	merge.DUP.37	1	1	1	1	1
chr1	35156761	35157135	merge.DUP.38	1	1	1	1	0
chr1	41544566	41545833	merge.DUP.39	1	1	1	1	0
chr1	45703127	45703384	merge.DUP.40	1	1	1	1	1
chr1	47184274	47184782	merge.DUP.41	1	1	1	1	0
chr1	51852506	51852615	merge.DUP.42	1	0	1	1	0
chr1	53283203	53285505	merge.DUP.43	1	1	1	1	0
chr1	60594823	60596991	merge.DUP.44	1	1	1	1	0
chr1	61393232	61393323	merge.DUP.45	1	1	1	1	0
chr1	67158852	67159277	merge.DUP.46	1	1	1	1	0
chr1	70928122	70928206	merge.DUP.47	1	1	1	1	0
chr1	72158526	72161781	merge.DUP.48	1	1	1	1	1
chr1	82254783	82256071	merge.DUP.49	1	1	1	0	1
chr1	103230477	103230665	merge.DUP.50	1	1	1	1	0
chr1	105943279	105948655	merge.DUP.51	1	1	1	1	1
chr1	118318799	118319532	merge.DUP.52	1	1	0	1	0
chr1	125079638	125171347	merge.DUP.53	1	1	1	1	0
chr1	143211366	143242899	merge.DUP.54	0	1	1	1	1
chr1	144101281	144106922	merge.DUP.55	1	1	1	1	1
chr1	151847197	151847346	merge.DUP.56	0	1	1	0	0
chr1	152213241	152221115	merge.DUP.57	1	1	1	1	1
chr1	153256631	153257010	merge.DUP.58	0	1	1	1	0
chr1	154713958	154714658	merge.DUP.59	1	1	1	1	0
chr1	167056409	167057087	merge.DUP.60	1	1	1	0	0
chr1	168471944	168472231	merge.DUP.61	1	1	1	1	0
chr1	175650603	175651231	merge.DUP.62	1	1	1	1	0
chr1	202204190	202205997	merge.DUP.63	1	1	1	1	1
chr1	202245899	202246469	merge.DUP.64	1	0	1	1	0
chr1	204195129	204195755	merge.DUP.65	1	0	1	1	0
chr1	206052519	206058914	merge.DUP.66	1	1	1	1	1
chr1	206923710	206924785	merge.DUP.67	1	1	1	1	0
chr1	210653882	210654231	merge.DUP.68	1	1	1	1	1
chr1	218988269	218988319	merge.DUP.69	0	1	1	1	1
chr1	223478888	223479347	merge.DUP.70	1	1	0	1	0
chr1	223635542	223636909	merge.DUP.71	1	1	1	1	0
chr1	224378517	224378921	merge.DUP.72	1	1	1	1	0
chr1	231047179	231047793	merge.DUP.73	1	1	0	1	0
chr1	231202006	231202342	merge.DUP.74	1	1	1	1	0
chr1	234207358	234207470	merge.DUP.75	1	1	1	1	0
chr1	235078139	235078771	merge.DUP.76	1	1	1	1	1
chr1	235409758	235410054	merge.DUP.77	1	1	1	1	0
chr1	236097055	236097411	merge.DUP.78	1	1	1	1	1
chr1	236497968	236498227	merge.DUP.79	1	1	1	1	0
chr1	236713594	236715068	merge.DUP.80	1	1	1	1	1
chr1	240184920	240185221	merge.DUP.81	1	1	1	1	1
chr1	243480280	243480919	merge.DUP.82	0	1	1	1	0
chr1	243845345	243845536	merge.DUP.83	1	1	1	1	1
chr1	244793328	244793652	merge.DUP.84	1	1	1	1	1
chr1	244937045	244937250	merge.DUP.85	1	1	1	1	0
chr1	245102848	245103741	merge.DUP.86	1	1	1	1	0
chr1	246024294	246025344	merge.DUP.87	1	1	1	1	0
chr1	246324967	246325320	merge.DUP.88	1	1	1	1	0
chr1	246575946	246576269	merge.DUP.89	0	0	1	1	0
chr1	246642806	246642869	merge.DUP.90	1	1	1	1	0
chr1	247128851	247130026	merge.DUP.91	1	1	1	1	0
chr1	247363101	247363352	merge.DUP.92	1	1	1	1	1
chr1	247870261	247871086	merge.DUP.93	1	1	1	1	0
chr1	248306428	248306937	merge.DUP.94	1	1	0	0	0
chr1	248382975	248384682	merge.DUP.95	1	1	1	1	0
chr1	248404180	248404257	merge.DUP.96	1	1	1	1	1
chr1	248408054	248409126	merge.DUP.97	1	1	1	0	0
chr1	248945550	248946424	merge.DUP.98	1	1	1	1	0
chr10	321529	323487	merge.DUP.99	0	1	1	1	0
chr10	417581	418366	merge.DUP.100	1	1	1	1	0
chr10	556035	556375	merge.DUP.101	1	0	0	1	0
chr10	717731	718503	merge.DUP.102	1	1	1	1	1
chr10	744073	744529	merge.DUP.103	1	1	1	1	1
chr10	1174069	1174344	merge.DUP.104	1	0	1	1	0
chr10	1577135	1577448	merge.DUP.105	1	0	1	1	0
chr10	3313947	3315287	merge.DUP.106	1	1	0	1	0
chr10	3411146	3411413	merge.DUP.107	1	1	1	1	0
chr10	5169108	5169447	merge.DUP.108	1	1	1	1	0
chr10	6404369	6405005	merge.DUP.109	1	1	0	1	0
chr10	7526453	7526999	merge.DUP.110	1	1	1	1	0
chr10	11283776	11285123	merge.DUP.111	1	1	1	1	0
chr10	14568305	14568790	merge.DUP.112	1	1	1	0	0
chr10	15209301	15209597	merge.DUP.113	1	1	1	1	1
chr10	26570660	26660907	merge.DUP.114	1	1	1	1	0
chr10	38483413	38529909	merge.DUP.115	1	1	1	1	1
chr10	38911676	38920350	merge.DUP.116	1	1	0	1	0
chr10	41856987	41916266	merge.DUP.117	1	1	1	1	1
chr10	43210844	43211041	merge.DUP.118	1	0	1	1	0
chr10	44662654	44663105	merge.DUP.119	1	1	1	1	0
chr10	47180042	47181027	merge.DUP.120	1	0	1	1	0
chr10	59881985	59882640	merge.DUP.121	1	1	1	1	0
chr10	60468974	60469699	merge.DUP.122	1	1	1	0	0
chr10	71688353	71689245	merge.DUP.123	1	1	1	1	0
chr10	74819336	74819379	merge.DUP.124	1	1	1	1	0
chr10	86504400	86504626	merge.DUP.125	0	1	1	0	0
chr10	98044253	98044638	merge.DUP.126	1	1	1	1	0
chr10	99580488	99580575	merge.DUP.127	1	1	1	1	0
chr10	104035783	104036243	merge.DUP.128	1	1	1	1	0
chr10	108729707	108730403	merge.DUP.129	1	1	1	1	0
chr10	123254329	123255946	merge.DUP.130	1	1	1	1	0
chr10	124610310	124611055	merge.DUP.131	1	1	1	1	0
chr10	125824762	125825187	merge.DUP.132	1	1	1	1	0
chr10	126120870	126121585	merge.DUP.133	1	1	1	1	0
chr10	126251449	126252330	merge.DUP.134	1	1	1	1	0
chr10	126947218	126948508	merge.DUP.135	1	1	1	1	1
chr10	127797331	127797955	merge.DUP.136	0	1	1	1	0
chr10	128464352	128464642	merge.DUP.137	1	1	1	1	1
chr10	130360159	130360715	merge.DUP.138	1	1	0	1	0
chr10	130496335	130496545	merge.DUP.139	1	1	1	1	0
chr10	130790011	130791740	merge.DUP.140	1	1	1	1	0
chr10	131176222	131177267	merge.DUP.141	1	1	0	1	0
chr10	131850808	131851337	merge.DUP.142	0	1	1	1	0
chr10	132364294	132364845	merge.DUP.143	1	1	1	1	1
chr10	132512535	132512828	merge.DUP.144	0	1	1	1	0
chr10	132622237	132623059	merge.DUP.145	0	1	1	0	0
chr10	132774793	132775240	merge.DUP.146	1	1	1	1	0
chr10	133010694	133011826	merge.DUP.147	1	1	1	1	0
chr10	133069456	133070033	merge.DUP.148	1	1	1	1	0
chr10	133111034	133112080	merge.DUP.149	1	1	1	1	0
chr10	133476924	133481151	merge.DUP.150	1	1	1	1	0
chr10	133664949	133764422	merge.DUP.151	1	1	1	1	0
chr11	186208	187044	merge.DUP.152	1	1	1	1	0
chr11	195782	196672	merge.DUP.153	1	1	0	0	0
chr11	220683	221134	merge.DUP.154	1	1	1	1	0
chr11	287302	287915	merge.DUP.155	1	1	1	0	0
chr11	356451	358046	merge.DUP.156	1	1	1	1	1
chr11	361037	361191	merge.DUP.157	1	1	1	1	0
chr11	397848	398878	merge.DUP.158	1	1	1	1	0
chr11	519233	520328	merge.DUP.159	1	1	1	1	0
chr11	585209	585677	merge.DUP.160	1	1	1	1	1
chr11	642712	642887	merge.DUP.161	1	1	1	1	1
chr11	664355	665365	merge.DUP.162	1	0	1	1	0
chr11	964768	965305	merge.DUP.163	1	1	1	1	1
chr11	975204	975902	merge.DUP.164	1	0	1	0	0
chr11	1016530	1018604	merge.DUP.165	1	1	1	1	1
chr11	1078608	1081579	merge.DUP.166	1	1	1	1	0
chr11	1095494	1099763	merge.DUP.167	1	1	1	1	0
chr11	1287379	1287919	merge.DUP.168	1	1	1	1	0
chr11	1396167	1396305	merge.DUP.169	1	1	1	1	0
chr11	1423660	1423867	merge.DUP.170	0	1	1	1	0
chr11	1537658	1538101	merge.DUP.171	1	1	1	1	1
chr11	1670500	1671124	merge.DUP.172	1	1	1	1	1
chr11	1939844	1940505	merge.DUP.173	1	1	1	1	1
chr11	3096910	3097177	merge.DUP.174	1	1	1	1	0
chr11	3204199	3204399	merge.DUP.175	1	0	0	1	0
chr11	3653753	3654827	merge.DUP.176	1	1	1	1	1
chr11	8158730	8159038	merge.DUP.177	1	1	0	1	0
chr11	11246454	11247232	merge.DUP.178	1	1	1	1	1
chr11	12640815	12641286	merge.DUP.179	1	1	0	1	0
chr11	18378271	18378468	merge.DUP.180	1	1	1	1	0
chr11	35248454	35248877	merge.DUP.181	1	1	1	1	1
chr11	36287024	36287493	merge.DUP.182	1	1	1	1	1
chr11	36309611	36309667	merge.DUP.183	0	1	1	1	1
chr11	42943772	42954531	merge.DUP.184	1	1	1	1	1
chr11	45101588	45102296	merge.DUP.185	1	1	1	1	0
chr11	47371081	47371391	merge.DUP.186	1	1	1	1	1
chr11	47638281	47638556	merge.DUP.187	1	1	1	0	1
chr11	48909741	48942429	merge.DUP.188	1	1	1	1	1
chr11	50806596	50821349	merge.DUP.189	1	1	0	1	0
chr11	56697713	56708340	merge.DUP.190	1	1	1	1	1
chr11	59282590	59282748	merge.DUP.191	0	1	1	0	0
chr11	62009600	62010718	merge.DUP.192	1	1	1	1	1
chr11	63931435	63934475	merge.DUP.193	0	0	1	1	0
chr11	64553128	64553263	merge.DUP.194	1	1	1	1	0
chr11	65970739	65971696	merge.DUP.195	1	1	1	0	0
chr11	67233387	67233604	merge.DUP.196	0	1	1	1	0
chr11	68557763	68564805	merge.DUP.197	1	1	1	1	0
chr11	68888798	68889094	merge.DUP.198	0	1	1	1	1
chr11	68963952	68964187	merge.DUP.199	1	1	1	1	1
chr11	69182881	69183211	merge.DUP.200	1	1	1	1	0
chr11	69917047	69918029	merge.DUP.201	1	1	1	1	0
chr11	70371325	70371572	merge.DUP.202	1	1	1	1	1
chr11	71380332	71380909	merge.DUP.203	1	1	1	1	0
chr11	72601094	72601366	merge.DUP.204	1	0	1	1	0
chr11	77192791	77193606	merge.DUP.205	1	1	1	1	0
chr11	82161506	82161902	merge.DUP.206	1	1	1	0	0
chr11	92705289	92706122	merge.DUP.207	0	1	1	0	0
chr11	94232895	94241278	merge.DUP.208	1	1	1	1	1
chr11	102730747	102731371	merge.DUP.209	1	1	1	1	1
chr11	118421670	118423317	merge.DUP.210	1	1	1	1	1
chr11	120328597	120329163	merge.DUP.211	1	1	1	1	0
chr11	121185261	121186205	merge.DUP.212	1	1	1	1	1
chr11	121329239	121329293	merge.DUP.213	0	1	1	1	0
chr11	122016500	122019075	merge.DUP.214	1	1	1	1	0
chr11	122451714	122548397	merge.DUP.215	1	1	1	1	1
chr11	128930487	128931024	merge.DUP.216	1	1	1	1	0
chr11	131342139	131342609	merge.DUP.217	1	1	1	1	0
chr11	131680352	131681931	merge.DUP.218	1	1	1	1	0
chr11	133140693	133141085	merge.DUP.219	1	1	1	1	1
chr11	133932223	133933055	merge.DUP.220	1	1	1	1	0
chr11	134451472	134452033	merge.DUP.221	0	0	1	1	0
chr11	134656498	134657078	merge.DUP.222	1	1	0	1	0
chr11	134839391	134840356	merge.DUP.223	1	1	1	1	1
chr11	134851636	134852163	merge.DUP.224	1	1	1	1	1
chr12	163127	163404	merge.DUP.225	1	1	1	1	0
chr12	419393	422284	merge.DUP.226	1	1	1	1	1
chr12	1574338	1574541	merge.DUP.227	1	1	1	1	0
chr12	1662317	1662761	merge.DUP.228	1	0	1	0	0
chr12	2255791	2256098	merge.DUP.229	1	1	1	1	1
chr12	2407256	2407772	merge.DUP.230	1	1	1	1	0
chr12	2520070	2520895	merge.DUP.231	1	1	1	1	0
chr12	2539201	2539901	merge.DUP.232	1	1	1	1	1
chr12	2682851	2682919	merge.DUP.233	1	1	1	1	0
chr12	3197651	3198907	merge.DUP.234	0	0	1	1	0
chr12	6305422	6305708	merge.DUP.235	1	1	1	1	0
chr12	6893215	6893951	merge.DUP.236	1	1	1	0	0
chr12	6949812	6950081	merge.DUP.237	1	1	1	1	0
chr12	7584223	7584375	merge.DUP.238	0	1	1	1	0
chr12	8208855	8238305	merge.DUP.239	1	1	1	1	1
chr12	11003064	11134285	merge.DUP.240	1	1	1	1	0
chr12	12653308	12653640	merge.DUP.241	1	1	1	1	0
chr12	34769409	34820186	merge.DUP.242	0	1	0	1	0
chr12	37235253	37240946	merge.DUP.243	1	1	1	1	1
chr12	40504822	40515351	merge.DUP.244	1	1	1	1	0
chr12	49032724	49033006	merge.DUP.245	0	1	1	1	0
chr12	53148228	53148336	merge.DUP.246	1	1	1	0	0
chr12	73735195	73761438	merge.DUP.247	1	1	1	1	0
chr12	76120569	76122641	merge.DUP.248	1	1	0	0	0
chr12	79760921	79769039	merge.DUP.249	1	1	1	1	1
chr12	108578479	108579203	merge.DUP.250	1	1	0	1	0
chr12	114063782	114064641	merge.DUP.251	1	1	1	1	0
chr12	120437109	120437415	merge.DUP.252	1	0	1	1	0
chr12	121747240	121748257	merge.DUP.253	1	1	1	1	0
chr12	121750449	121751445	merge.DUP.254	1	1	1	1	0
chr12	122902327	122902579	merge.DUP.255	1	1	1	0	0
chr12	124438670	124439892	merge.DUP.256	1	1	1	1	0
chr12	124999609	124999922	merge.DUP.257	1	1	1	1	0
chr12	127568281	127569092	merge.DUP.258	1	1	0	1	0
chr12	129303137	129303635	merge.DUP.259	1	1	0	1	0
chr12	129538812	129539011	merge.DUP.260	1	1	1	1	0
chr12	131036214	131038128	merge.DUP.261	1	1	1	1	0
chr12	131278142	131278729	merge.DUP.262	1	1	1	1	0
chr12	131576092	131577493	merge.DUP.263	1	1	1	1	1
chr12	131588250	131588746	merge.DUP.264	1	0	0	1	0
chr12	131601288	131629251	merge.DUP.265	1	1	1	1	0
chr12	131701093	131701845	merge.DUP.266	1	1	1	1	0
chr12	131871334	131871634	merge.DUP.267	1	1	1	1	0
chr12	131917069	131917386	merge.DUP.268	1	1	1	1	0
chr12	131918723	131919075	merge.DUP.269	1	1	1	1	0
chr12	131998635	131998945	merge.DUP.270	1	1	1	1	1
chr12	132134624	132136423	merge.DUP.271	1	1	1	0	0
chr12	132240791	132243344	merge.DUP.272	1	1	1	1	1
chr12	132244249	132244847	merge.DUP.273	0	1	1	1	0
chr12	132563689	132564011	merge.DUP.274	1	0	1	1	0
chr12	132718359	132718662	merge.DUP.275	0	1	1	1	0
chr12	132742689	132742829	merge.DUP.276	1	0	1	1	0
chr12	132758876	132759270	merge.DUP.277	1	1	1	0	0
chr12	133090535	133096480	merge.DUP.278	1	1	1	0	1
chr13	18211701	18215463	merge.DUP.279	0	1	1	1	0
chr13	19137426	19138391	merge.DUP.280	1	1	1	1	1
chr13	25159100	25159650	merge.DUP.281	1	0	0	1	0
chr13	26972689	26973551	merge.DUP.282	1	1	1	1	0
chr13	35957896	35958597	merge.DUP.283	1	1	1	1	0
chr13	45423500	45425706	merge.DUP.284	1	1	1	1	0
chr13	66141326	66147038	merge.DUP.285	1	1	0	1	0
chr13	98473239	98473299	merge.DUP.286	0	1	1	1	0
chr13	98605291	98606308	merge.DUP.287	1	0	1	1	0
chr13	100451671	100452274	merge.DUP.288	1	1	1	1	0
chr13	101334377	101334489	merge.DUP.289	1	1	1	0	0
chr13	104897127	104902396	merge.DUP.290	1	1	1	1	0
chr13	107866297	107866382	merge.DUP.291	1	1	0	1	0
chr13	110255527	110255944	merge.DUP.292	0	1	1	1	0
chr13	110385400	110386226	merge.DUP.293	1	1	0	1	1
chr13	110480847	110482111	merge.DUP.294	0	1	1	1	0
chr13	111567866	111568551	merge.DUP.295	0	1	1	1	0
chr13	112539704	112540762	merge.DUP.296	1	1	1	1	0
chr13	112872803	112873434	merge.DUP.297	1	1	1	1	0
chr13	113262766	113263197	merge.DUP.298	1	1	1	1	1
chr13	113371388	113371926	merge.DUP.299	1	1	1	1	0
chr13	113817243	113817601	merge.DUP.300	1	1	1	1	0
chr13	114119478	114120629	merge.DUP.301	1	1	1	1	0
chr14	48938334	48938990	merge.DUP.302	1	1	1	1	0
chr14	59749089	59750716	merge.DUP.303	1	1	1	1	1
chr14	68866112	68866406	merge.DUP.304	1	1	1	1	1
chr14	73294515	73294966	merge.DUP.305	1	1	1	1	0
chr14	74461810	74462105	merge.DUP.306	0	0	1	1	0
chr14	75559161	75559296	merge.DUP.307	1	1	1	0	0
chr14	82674759	82676320	merge.DUP.308	0	1	1	1	1
chr14	88683079	88684238	merge.DUP.309	0	1	1	1	0
chr14	89360698	89362826	merge.DUP.310	1	1	1	1	1
chr14	92546969	92547413	merge.DUP.311	0	1	1	1	0
chr14	100957038	100957559	merge.DUP.312	1	1	1	1	1
chr14	101607466	101608236	merge.DUP.313	1	1	1	1	1
chr14	103896553	103896800	merge.DUP.314	1	1	1	1	0
chr14	104153435	104153650	merge.DUP.315	1	1	1	1	0
chr14	104214847	104215739	merge.DUP.316	1	1	0	1	0
chr14	104250783	104252101	merge.DUP.317	1	1	1	1	0
chr14	104288615	104289662	merge.DUP.318	1	1	1	1	0
chr14	104806539	104806814	merge.DUP.319	1	1	1	1	0
chr14	105162454	105163891	merge.DUP.320	1	1	1	1	1
chr14	105477656	105477894	merge.DUP.321	1	1	1	1	0
chr14	105582657	105583465	merge.DUP.322	1	1	1	1	0
chr14	106705658	106753814	merge.DUP.323	1	1	1	1	1
chr15	17080516	17083575	merge.DUP.324	1	1	1	1	0
chr15	20100257	20106502	merge.DUP.325	1	1	1	1	1
chr15	20340231	20344111	merge.DUP.326	1	1	1	1	1
chr15	21107363	21113024	merge.DUP.327	1	1	1	1	1
chr15	23497994	23498574	merge.DUP.328	1	0	1	1	0
chr15	25527941	25528444	merge.DUP.329	1	1	0	1	0
chr15	25757814	25758938	merge.DUP.330	0	1	1	1	0
chr15	34346602	34346909	merge.DUP.331	1	0	1	1	0
chr15	40050450	40051040	merge.DUP.332	1	1	1	1	0
chr15	60349767	60350180	merge.DUP.333	1	1	1	1	1
chr15	77699273	77699782	merge.DUP.334	1	1	1	1	1
chr15	85896280	85897563	merge.DUP.335	1	1	1	1	1
chr15	89342377	89342697	merge.DUP.336	1	1	1	1	0
chr15	90646951	90647720	merge.DUP.337	1	1	1	1	1
chr15	90655446	90655625	merge.DUP.338	1	1	1	0	0
chr15	91749084	91750155	merge.DUP.339	1	1	1	1	0
chr15	100058127	100058393	merge.DUP.340	1	1	1	1	0
chr15	100719054	100720347	merge.DUP.341	1	1	0	1	0
chr16	19531	19903	merge.DUP.342	0	1	1	1	0
chr16	159823	160883	merge.DUP.343	1	1	1	1	0
chr16	239138	239331	merge.DUP.344	1	1	1	0	0
chr16	267502	268285	merge.DUP.345	1	1	1	1	0
chr16	370268	370466	merge.DUP.346	1	0	0	1	0
chr16	378140	378521	merge.DUP.347	1	1	1	1	0
chr16	458384	458622	merge.DUP.348	1	1	1	1	1
chr16	492356	492544	merge.DUP.349	1	1	1	1	0
chr16	494757	495052	merge.DUP.350	1	1	1	1	1
chr16	503876	505003	merge.DUP.351	1	0	1	1	0
chr16	544688	544926	merge.DUP.352	1	1	1	1	0
chr16	571020	571639	merge.DUP.353	1	1	1	1	0
chr16	818698	818962	merge.DUP.354	1	1	1	1	0
chr16	824303	824435	merge.DUP.355	0	0	0	1	0
chr16	846530	847284	merge.DUP.356	1	1	1	1	1
chr16	857419	859991	merge.DUP.357	1	1	1	1	1
chr16	914489	914859	merge.DUP.358	1	1	1	1	1
chr16	1011150	1011542	merge.DUP.359	1	1	1	1	0
chr16	1025243	1025738	merge.DUP.360	1	1	1	1	1
chr16	1092243	1093360	merge.DUP.361	1	1	0	1	0
chr16	1113848	1114204	merge.DUP.362	1	1	1	1	0
chr16	1185578	1186203	merge.DUP.363	1	1	1	1	1
chr16	1339721	1340604	merge.DUP.364	1	1	0	1	0
chr16	1919999	1920485	merge.DUP.365	0	0	1	1	0
chr16	2863258	2863553	merge.DUP.366	1	1	1	1	1
chr16	3197673	3198183	merge.DUP.367	1	1	1	1	0
chr16	4344168	4344874	merge.DUP.368	1	1	1	1	1
chr16	8561582	8565124	merge.DUP.369	0	1	1	1	0
chr16	10039933	10040734	merge.DUP.370	1	1	0	1	0
chr16	10652457	10652877	merge.DUP.371	1	1	1	1	0
chr16	24108872	24109400	merge.DUP.372	0	1	1	0	0
chr16	24872868	24873125	merge.DUP.373	0	0	1	1	0
chr16	26373779	26375018	merge.DUP.374	1	1	1	1	1
chr16	27941452	27941652	merge.DUP.375	1	0	1	1	0
chr16	30123842	30124234	merge.DUP.376	1	1	1	1	0
chr16	30451333	30451593	merge.DUP.377	1	1	1	1	0
chr16	33335925	33340037	merge.DUP.378	1	1	1	1	1
chr16	34571511	34584087	merge.DUP.379	0	1	1	0	0
chr16	46382553	46466590	merge.DUP.380	1	1	1	1	1
chr16	65128215	65129731	merge.DUP.381	0	1	1	0	0
chr16	67809162	67809491	merge.DUP.382	1	1	1	1	0
chr16	69191278	69191536	merge.DUP.383	1	1	1	1	1
chr16	71291353	71291808	merge.DUP.384	1	1	1	1	1
chr16	75456487	75549512	merge.DUP.385	1	0	1	1	0
chr16	81576913	81578297	merge.DUP.386	1	1	1	1	1
chr16	81704120	81704757	merge.DUP.387	1	1	1	0	0
chr16	81764813	81765624	merge.DUP.388	1	1	1	1	1
chr16	83950271	83951089	merge.DUP.389	1	0	1	1	0
chr16	85972581	85974133	merge.DUP.390	1	1	1	1	0
chr16	86464074	86464697	merge.DUP.391	1	0	1	1	0
chr16	87738533	87739674	merge.DUP.392	1	1	1	1	0
chr16	88546840	88547890	merge.DUP.393	1	1	1	1	0
chr16	88668175	88668404	merge.DUP.394	1	1	1	1	1
chr16	88712911	88713298	merge.DUP.395	1	1	1	1	0
chr16	88894146	88894632	merge.DUP.396	1	1	1	1	0
chr16	89002098	89003277	merge.DUP.397	1	1	1	1	0
chr16	89007994	89009352	merge.DUP.398	1	1	1	1	0
chr16	89634510	89635237	merge.DUP.399	1	1	1	1	0
chr16	89647509	89648449	merge.DUP.400	1	1	1	1	0
chr16	89987371	89987439	merge.DUP.401	1	1	1	1	1
chr16	90007851	90008762	merge.DUP.402	1	1	1	1	0
chr16	90116732	90118463	merge.DUP.403	1	1	1	1	0
chr17	116738	118201	merge.DUP.404	1	1	1	1	1
chr17	121483	128139	merge.DUP.405	1	1	1	1	1
chr17	198309	198686	merge.DUP.406	1	1	1	1	0
chr17	216953	218563	merge.DUP.407	1	1	1	1	1
chr17	220090	222115	merge.DUP.408	1	1	1	1	1
chr17	235058	236076	merge.DUP.409	1	1	1	1	0
chr17	272905	273641	merge.DUP.410	1	1	1	1	1
chr17	303461	304226	merge.DUP.411	1	1	1	1	1
chr17	314389	317570	merge.DUP.412	1	1	1	1	1
chr17	340327	341162	merge.DUP.413	1	1	1	1	0
chr17	355647	356680	merge.DUP.414	1	1	1	1	1
chr17	488988	489128	merge.DUP.415	1	1	1	0	0
chr17	645755	646926	merge.DUP.416	1	1	1	1	0
chr17	809797	810371	merge.DUP.417	1	1	1	1	0
chr17	948806	949747	merge.DUP.418	0	1	1	1	0
chr17	952163	952871	merge.DUP.419	1	1	1	1	1
chr17	1062177	1065612	merge.DUP.420	1	1	1	1	1
chr17	1738798	1742110	merge.DUP.421	1	1	1	1	0
chr17	4852747	4853496	merge.DUP.422	1	1	1	1	0
chr17	6193869	6194500	merge.DUP.423	1	1	1	1	0
chr17	7302461	7303045	merge.DUP.424	1	1	1	1	0
chr17	10846407	10847019	merge.DUP.425	1	1	1	1	1
chr17	19060660	19066239	merge.DUP.426	1	1	1	1	0
chr17	26935981	26941028	merge.DUP.427	0	1	1	1	1
chr17	36182409	36195941	merge.DUP.428	1	1	1	1	1
chr17	36761038	36761499	merge.DUP.429	1	1	1	1	0
chr17	37398592	37398871	merge.DUP.430	1	1	1	1	0
chr17	41632551	41633824	merge.DUP.431	0	1	1	1	0
chr17	42397324	42397965	merge.DUP.432	1	1	1	1	0
chr17	43024227	43024461	merge.DUP.433	1	0	1	1	0
chr17	43227254	43306129	merge.DUP.434	1	1	1	1	0
chr17	44332137	44332367	merge.DUP.435	1	1	1	1	0
chr17	44984165	44985381	merge.DUP.436	1	1	1	1	0
chr17	45051675	45052133	merge.DUP.437	1	1	1	1	0
chr17	45512137	45520123	merge.DUP.438	1	1	1	1	1
chr17	48089548	48089840	merge.DUP.439	1	1	0	1	0
chr17	50041112	50041399	merge.DUP.440	1	0	0	1	0
chr17	50085672	50086308	merge.DUP.441	1	1	1	1	1
chr17	65499936	65500400	merge.DUP.442	1	1	1	1	0
chr17	71694239	71715004	merge.DUP.443	1	1	1	1	0
chr17	72236540	72236865	merge.DUP.444	1	1	1	1	1
chr17	72961435	72961915	merge.DUP.445	1	1	1	0	0
chr17	73147914	73148387	merge.DUP.446	0	1	1	1	0
chr17	73405165	73405467	merge.DUP.447	1	0	0	1	0
chr17	74732461	74733636	merge.DUP.448	1	1	1	1	0
chr17	75431092	75431967	merge.DUP.449	0	1	1	1	0
chr17	76073299	76073595	merge.DUP.450	1	1	1	1	0
chr17	77647271	77647624	merge.DUP.451	0	1	0	1	0
chr17	78115606	78115938	merge.DUP.452	1	1	1	1	0
chr17	78350770	78351267	merge.DUP.453	0	0	1	1	0
chr17	79554287	79554513	merge.DUP.454	0	1	1	1	0
chr17	80024286	80025223	merge.DUP.455	1	1	1	1	0
chr17	80313410	80316060	merge.DUP.456	1	1	1	1	0
chr17	80497859	80498112	merge.DUP.457	1	1	1	1	0
chr17	80743656	80745023	merge.DUP.458	1	1	1	1	0
chr17	80929968	80930526	merge.DUP.459	1	1	1	1	0
chr17	80963375	80963854	merge.DUP.460	1	1	1	1	0
chr17	81249166	81249574	merge.DUP.461	1	1	1	1	0
chr17	81352603	81352888	merge.DUP.462	1	1	1	1	0
chr17	81424485	81426524	merge.DUP.463	1	1	1	1	1
chr17	81742180	81742544	merge.DUP.464	1	1	1	1	0
chr17	81792543	81793669	merge.DUP.465	1	1	1	1	0
chr17	82215622	82215749	merge.DUP.466	1	1	1	0	0
chr17	82518605	82518744	merge.DUP.467	1	1	1	1	1
chr17	82586171	82586571	merge.DUP.468	1	1	1	1	1
chr17	82764738	82765455	merge.DUP.469	1	1	1	0	1
chr17	82971561	82972956	merge.DUP.470	1	1	1	1	0
chr17	83068140	83068895	merge.DUP.471	1	1	1	1	0
chr17	83103366	83103928	merge.DUP.472	1	1	1	1	0
chr17	83127622	83127891	merge.DUP.473	1	1	1	1	0
chr18	105703	111893	merge.DUP.474	1	1	1	0	0
chr18	3618657	3618954	merge.DUP.475	1	1	1	1	0
chr18	4510685	4511038	merge.DUP.476	1	1	1	1	1
chr18	15398545	15410900	merge.DUP.477	1	1	1	1	1
chr18	20571467	20580086	merge.DUP.478	1	1	1	1	0
chr18	22231929	22232860	merge.DUP.479	1	1	1	1	0
chr18	23218246	23218691	merge.DUP.480	1	1	1	1	0
chr18	23615975	23616189	merge.DUP.481	0	1	1	1	0
chr18	27279552	27282266	merge.DUP.482	1	1	1	0	1
chr18	31296142	31296412	merge.DUP.483	1	1	1	1	0
chr18	36463302	36463516	merge.DUP.484	1	1	1	1	1
chr18	37780250	37781430	merge.DUP.485	0	1	1	1	0
chr18	41283910	41293015	merge.DUP.486	1	1	1	1	1
chr18	46962115	47031672	merge.DUP.487	1	1	1	1	1
chr18	49067088	49067534	merge.DUP.488	1	1	1	1	0
chr18	57024495	57024957	merge.DUP.489	1	1	1	1	0
chr18	57509931	57510864	merge.DUP.490	1	1	0	1	0
chr18	59473635	59473907	merge.DUP.491	0	0	1	1	0
chr18	63218595	63218830	merge.DUP.492	1	1	1	1	0
chr18	74204684	74204901	merge.DUP.493	1	0	0	1	0
chr18	74616746	74617190	merge.DUP.494	1	1	1	1	0
chr18	76401716	76401874	merge.DUP.495	1	1	1	1	0
chr18	77117735	77118252	merge.DUP.496	0	1	1	0	0
chr18	78437114	78438437	merge.DUP.497	0	1	1	1	0
chr18	78502357	78503067	merge.DUP.498	1	1	1	1	0
chr18	78512771	78514916	merge.DUP.499	1	1	1	1	0
chr18	79014309	79017286	merge.DUP.500	1	1	1	1	1
chr18	79200704	79200792	merge.DUP.501	1	1	1	1	0
chr18	79356783	79358979	merge.DUP.502	0	0	1	1	0
chr18	79494192	79495007	merge.DUP.503	0	1	1	1	0
chr18	79504755	79505954	merge.DUP.504	1	1	1	1	0
chr18	79684887	79685108	merge.DUP.505	1	1	1	1	0
chr18	79691449	79692195	merge.DUP.506	1	1	0	1	0
chr18	80258292	80258951	merge.DUP.507	1	1	1	1	0
chr19	310474	310915	merge.DUP.508	1	1	1	1	0
chr19	360048	361964	merge.DUP.509	1	1	1	1	1
chr19	380777	382734	merge.DUP.510	1	1	1	1	1
chr19	387958	388380	merge.DUP.511	0	1	0	1	0
chr19	410716	411355	merge.DUP.512	1	1	1	1	0
chr19	431250	434597	merge.DUP.513	1	1	1	1	1
chr19	524701	525210	merge.DUP.514	1	1	1	1	0
chr19	563953	565604	merge.DUP.515	1	1	1	1	1
chr19	602070	602453	merge.DUP.516	1	1	1	0	0
chr19	835409	835549	merge.DUP.517	1	1	1	1	1
chr19	877648	879971	merge.DUP.518	1	1	1	1	1
chr19	1049434	1050068	merge.DUP.519	1	1	1	1	1
chr19	1142018	1142311	merge.DUP.520	1	1	1	1	1
chr19	1148458	1149075	merge.DUP.521	1	1	1	1	1
chr19	1162189	1162478	merge.DUP.522	1	1	1	1	1
chr19	1164332	1164995	merge.DUP.523	1	1	1	1	0
chr19	1282053	1282768	merge.DUP.524	1	1	1	1	0
chr19	1327809	1328115	merge.DUP.525	1	0	0	1	0
chr19	1669506	1670283	merge.DUP.526	1	1	1	1	0
chr19	2015727	2016153	merge.DUP.527	1	1	0	1	0
chr19	2037010	2037290	merge.DUP.528	1	1	1	1	0
chr19	2418232	2419198	merge.DUP.529	1	0	1	1	0
chr19	3127975	3128275	merge.DUP.530	1	1	1	1	1
chr19	3309660	3311333	merge.DUP.531	0	1	1	1	0
chr19	3332161	3332992	merge.DUP.532	1	1	1	1	0
chr19	3649039	3649892	merge.DUP.533	1	1	1	1	1
chr19	3989853	3990152	merge.DUP.534	1	0	1	1	0
chr19	4035726	4036964	merge.DUP.535	1	1	1	1	0
chr19	4218279	4225252	merge.DUP.536	1	1	1	1	1
chr19	5787179	5787247	merge.DUP.537	1	1	1	1	0
chr19	6069985	6070268	merge.DUP.538	1	1	0	1	0
chr19	7152975	7153503	merge.DUP.539	1	1	0	1	0
chr19	7450129	7451151	merge.DUP.540	1	1	1	1	1
chr19	8422701	8423204	merge.DUP.541	1	1	1	1	0
chr19	8621678	8621720	merge.DUP.542	0	1	1	1	1
chr19	8881491	8911477	merge.DUP.543	1	1	1	1	0
chr19	12989088	12989808	merge.DUP.544	1	0	1	1	0
chr19	13535787	13536292	merge.DUP.545	1	1	0	1	1
chr19	13626710	13628055	merge.DUP.546	0	1	0	1	1
chr19	15581005	15581400	merge.DUP.547	1	1	1	0	0
chr19	15778128	15779584	merge.DUP.548	0	1	1	1	0
chr19	15931525	15934083	merge.DUP.549	1	0	1	1	0
chr19	17331931	17340183	merge.DUP.550	1	1	1	1	1
chr19	18283761	18284576	merge.DUP.551	1	1	1	1	0
chr19	18441979	18442641	merge.DUP.552	1	0	0	1	0
chr19	19116418	19117106	merge.DUP.553	1	1	1	1	0
chr19	19210613	19211291	merge.DUP.554	1	0	0	1	1
chr19	19861531	19918945	merge.DUP.555	1	1	1	1	0
chr19	24082374	24082680	merge.DUP.556	1	1	1	0	0
chr19	27349837	27371123	merge.DUP.557	1	1	0	1	0
chr19	28888224	28888624	merge.DUP.558	1	1	1	1	0
chr19	29511692	29514835	merge.DUP.559	1	1	1	1	0
chr19	32595874	32596652	merge.DUP.560	0	1	1	1	0
chr19	33249725	33250989	merge.DUP.561	0	1	1	1	0
chr19	34390180	34392993	merge.DUP.562	1	1	1	1	1
chr19	36195535	36196247	merge.DUP.563	1	1	1	1	1
chr19	38546691	38547352	merge.DUP.564	1	1	1	1	0
chr19	43323511	43329388	merge.DUP.565	1	1	1	1	1
chr19	45193790	45194114	merge.DUP.566	1	1	1	1	0
chr19	48761215	48762576	merge.DUP.567	1	1	0	1	0
chr19	49166364	49167888	merge.DUP.568	1	0	1	1	0
chr19	49169275	49169584	merge.DUP.569	1	0	1	1	0
chr19	49460915	49463814	merge.DUP.570	1	1	1	1	0
chr19	54109798	54109878	merge.DUP.571	1	1	1	1	0
chr19	54133721	54134365	merge.DUP.572	1	1	1	1	1
chr19	54349062	54349910	merge.DUP.573	1	1	1	1	0
chr19	54724186	54861482	merge.DUP.574	1	1	1	1	0
chr19	55670424	55670964	merge.DUP.575	1	1	1	1	1
chr19	56942896	56943006	merge.DUP.576	1	1	1	1	0
chr19	58538947	58542914	merge.DUP.577	1	1	1	1	0
chr2	426471	427602	merge.DUP.578	1	1	0	1	0
chr2	739917	740920	merge.DUP.579	1	1	1	1	1
chr2	747727	748193	merge.DUP.580	1	1	0	1	0
chr2	860885	861265	merge.DUP.581	0	1	1	1	1
chr2	909660	910334	merge.DUP.582	1	1	1	1	1
chr2	1222458	1223433	merge.DUP.583	1	1	1	1	1
chr2	1706418	1707448	merge.DUP.584	1	1	1	1	0
chr2	1861593	1861999	merge.DUP.585	1	1	1	1	0
chr2	2295528	2295994	merge.DUP.586	1	1	1	1	0
chr2	3045495	3046543	merge.DUP.587	1	1	1	1	0
chr2	3140585	3141605	merge.DUP.588	1	1	0	1	0
chr2	3180399	3181764	merge.DUP.589	1	1	1	1	1
chr2	3220745	3221887	merge.DUP.590	1	0	1	1	0
chr2	3725402	3725930	merge.DUP.591	1	1	1	1	1
chr2	4410126	4410266	merge.DUP.592	1	1	0	1	0
chr2	5022390	5023596	merge.DUP.593	1	1	1	1	0
chr2	7488369	7489342	merge.DUP.594	1	1	1	1	0
chr2	9406008	9406572	merge.DUP.595	1	1	1	1	0
chr2	10953653	10954166	merge.DUP.596	1	1	1	1	0
chr2	10954621	10954904	merge.DUP.597	0	0	1	1	0
chr2	11636714	11637095	merge.DUP.598	1	0	0	1	0
chr2	32916198	32916627	merge.DUP.599	1	1	1	1	1
chr2	47768707	47768967	merge.DUP.600	1	0	1	1	0
chr2	64375582	64376306	merge.DUP.601	1	1	1	1	1
chr2	65600474	65601147	merge.DUP.602	1	0	1	1	0
chr2	70434149	70435325	merge.DUP.603	0	1	1	1	0
chr2	71617537	71618805	merge.DUP.604	1	1	1	1	0
chr2	80966225	80992588	merge.DUP.605	1	1	1	0	0
chr2	88181081	88181572	merge.DUP.606	1	1	1	1	0
chr2	90288430	90298620	merge.DUP.607	1	1	1	1	1
chr2	90379826	90402512	merge.DUP.608	1	1	0	0	1
chr2	102350124	102353236	merge.DUP.609	1	1	1	1	0
chr2	111251453	111251602	merge.DUP.610	1	1	1	0	0
chr2	113650612	113655769	merge.DUP.611	1	1	1	0	0
chr2	120391356	120391930	merge.DUP.612	1	1	1	1	0
chr2	122273946	122275333	merge.DUP.613	1	1	0	1	0
chr2	123356528	123357298	merge.DUP.614	1	1	1	1	0
chr2	123682614	123682713	merge.DUP.615	1	1	1	1	0
chr2	126937506	126977113	merge.DUP.616	1	1	1	1	0
chr2	135117411	135117864	merge.DUP.617	1	1	1	1	1
chr2	140078413	140091948	merge.DUP.618	1	1	1	1	1
chr2	142624393	142639795	merge.DUP.619	1	1	1	1	0
chr2	162936687	162937243	merge.DUP.620	1	1	1	0	0
chr2	168974981	168975824	merge.DUP.621	1	1	1	1	1
chr2	182385706	182385903	merge.DUP.622	1	1	1	1	0
chr2	182505508	182507894	merge.DUP.623	1	1	1	1	0
chr2	238870102	238871699	merge.DUP.624	1	1	1	1	0
chr2	238908633	238909243	merge.DUP.625	1	1	0	1	0
chr2	240308669	240309887	merge.DUP.626	1	0	0	1	0
chr2	240625591	240626529	merge.DUP.627	1	1	1	1	0
chr2	240640026	240641050	merge.DUP.628	1	1	1	1	1
chr2	240812441	240813040	merge.DUP.629	1	1	0	1	0
chr2	240872129	240872508	merge.DUP.630	1	1	1	1	0
chr2	241589945	241591270	merge.DUP.631	1	1	1	1	0
chr2	241805183	241808103	merge.DUP.632	1	1	1	1	1
chr2	241819150	241820171	merge.DUP.633	1	1	1	1	0
chr2	241896481	241896908	merge.DUP.634	1	1	1	1	0
chr2	242006395	242010659	merge.DUP.635	1	1	1	1	0
chr20	1301630	1302639	merge.DUP.636	1	1	1	1	0
chr20	1777202	1777358	merge.DUP.637	1	1	1	1	0
chr20	1877003	1877248	merge.DUP.638	1	1	1	1	1
chr20	2236338	2236460	merge.DUP.639	0	1	1	1	0
chr20	22471872	22472083	merge.DUP.640	1	1	1	1	0
chr20	24836213	24836308	merge.DUP.641	1	0	1	1	0
chr20	25601604	25601876	merge.DUP.642	1	1	1	1	0
chr20	26596364	26599972	merge.DUP.643	0	1	0	1	0
chr20	28834095	28843403	merge.DUP.644	1	1	1	1	1
chr20	28859999	28897231	merge.DUP.645	1	1	1	1	0
chr20	31051509	31081003	merge.DUP.646	1	1	1	1	0
chr20	31161626	31245458	merge.DUP.647	1	1	1	1	0
chr20	38194564	38194637	merge.DUP.648	0	0	1	1	0
chr20	38462964	38464466	merge.DUP.649	1	1	1	1	0
chr20	38895740	38896438	merge.DUP.650	1	1	1	1	0
chr20	43696244	43697015	merge.DUP.651	1	1	1	1	0
chr20	44404471	44405137	merge.DUP.652	1	1	1	1	0
chr20	46788829	46789531	merge.DUP.653	1	1	1	1	1
chr20	47894543	47898098	merge.DUP.654	1	1	1	1	1
chr20	49617380	49617810	merge.DUP.655	1	1	1	1	0
chr20	53204017	53204449	merge.DUP.656	1	0	1	1	0
chr20	53837693	53837857	merge.DUP.657	1	0	1	1	0
chr20	58694893	58695356	merge.DUP.658	0	1	1	1	0
chr20	61329284	61329808	merge.DUP.659	0	1	1	1	0
chr20	61331559	61331725	merge.DUP.660	1	1	1	1	0
chr20	62875220	62875531	merge.DUP.661	1	0	1	1	0
chr20	63068440	63068771	merge.DUP.662	1	1	0	1	0
chr20	63101557	63101781	merge.DUP.663	1	0	0	1	0
chr20	63486794	63487301	merge.DUP.664	1	1	1	1	0
chr20	63491617	63493007	merge.DUP.665	1	1	1	1	0
chr20	63571119	63572093	merge.DUP.666	1	1	1	0	0
chr20	63948545	63948738	merge.DUP.667	1	1	1	1	1
chr20	64088233	64089132	merge.DUP.668	1	1	1	1	1
chr20	64286701	64287635	merge.DUP.669	0	1	1	1	0
chr21	6565384	6566345	merge.DUP.670	1	1	1	1	1
chr21	8218814	8240947	merge.DUP.671	1	1	1	1	1
chr21	10269869	10363280	merge.DUP.672	1	1	1	1	1
chr21	10426473	10427040	merge.DUP.673	1	1	1	1	1
chr21	10465995	10542645	merge.DUP.674	1	1	1	1	1
chr21	13985023	13987841	merge.DUP.675	1	1	1	0	0
chr21	27626687	27627449	merge.DUP.676	1	1	1	1	1
chr21	27748431	27767001	merge.DUP.677	1	1	1	1	0
chr21	29118096	29118292	merge.DUP.678	1	1	0	1	1
chr21	30741871	30755354	merge.DUP.679	0	1	0	0	0
chr21	32030109	32030739	merge.DUP.680	1	1	1	1	0
chr21	32832991	32833294	merge.DUP.681	1	1	0	1	0
chr21	33321347	33324053	merge.DUP.682	1	1	1	1	0
chr21	37756583	37757740	merge.DUP.683	0	0	1	1	0
chr21	39974382	39975153	merge.DUP.684	1	1	1	1	1
chr21	40182466	40183175	merge.DUP.685	1	1	1	1	0
chr21	40348042	40348705	merge.DUP.686	1	1	0	1	0
chr21	41672608	41672873	merge.DUP.687	1	1	0	1	0
chr21	41855884	41856310	merge.DUP.688	0	0	1	1	0
chr21	42108836	42109183	merge.DUP.689	1	1	1	1	0
chr21	42993743	42994338	merge.DUP.690	1	1	1	1	0
chr21	43262463	43262931	merge.DUP.691	1	1	1	1	1
chr21	43335922	43337652	merge.DUP.692	1	1	1	1	1
chr21	44419517	44420030	merge.DUP.693	1	0	1	1	0
chr21	44981512	44982460	merge.DUP.694	1	1	1	1	0
chr21	44983933	44984412	merge.DUP.695	1	0	1	1	0
chr21	45055043	45055317	merge.DUP.696	0	1	0	1	0
chr21	45155538	45156683	merge.DUP.697	1	0	1	1	0
chr21	45224474	45224749	merge.DUP.698	1	1	1	1	0
chr21	45345141	45346183	merge.DUP.699	1	1	1	1	0
chr21	45500062	45501128	merge.DUP.700	1	1	1	1	1
chr21	45633175	45634545	merge.DUP.701	1	1	1	1	1
chr21	45797145	45799665	merge.DUP.702	1	1	1	1	1
chr21	45896375	45897088	merge.DUP.703	1	0	0	1	0
chr21	45923768	45925225	merge.DUP.704	1	1	1	1	0
chr21	46033057	46033270	merge.DUP.705	1	0	1	1	0
chr21	46047312	46048888	merge.DUP.706	0	1	1	1	0
chr21	46054805	46055117	merge.DUP.707	1	1	1	1	1
chr21	46184458	46184784	merge.DUP.708	1	1	1	1	0
chr21	46289885	46290062	merge.DUP.709	1	1	1	0	0
chr21	46292484	46294708	merge.DUP.710	1	1	1	1	0
chr21	46399227	46399466	merge.DUP.711	1	1	1	1	0
chr22	11211027	11215507	merge.DUP.712	1	1	1	1	1
chr22	12309842	12310056	merge.DUP.713	1	1	0	1	0
chr22	17431974	17432232	merge.DUP.714	1	1	1	1	1
chr22	17447228	17524708	merge.DUP.715	0	1	0	1	0
chr22	17876698	17877610	merge.DUP.716	1	1	1	1	1
chr22	18105875	18107128	merge.DUP.717	1	1	0	1	0
chr22	18890486	18896992	merge.DUP.718	1	1	1	1	1
chr22	19202349	19202727	merge.DUP.719	1	1	1	1	0
chr22	20074945	20075770	merge.DUP.720	1	1	0	1	0
chr22	20162050	20164492	merge.DUP.721	1	1	1	1	1
chr22	20251494	20252209	merge.DUP.722	1	1	1	1	1
chr22	20503528	20503825	merge.DUP.723	1	1	1	1	1
chr22	21324401	21326998	merge.DUP.724	1	1	1	1	1
chr22	36126343	36128165	merge.DUP.725	1	1	1	1	0
chr22	36872414	36873438	merge.DUP.726	1	1	1	1	1
chr22	38110025	38110170	merge.DUP.727	1	1	1	0	0
chr22	38188960	38189269	merge.DUP.728	1	1	1	1	0
chr22	38644316	38644571	merge.DUP.729	1	1	1	1	1
chr22	41300507	41300772	merge.DUP.730	1	1	1	1	0
chr22	41939776	41939909	merge.DUP.731	1	1	1	1	0
chr22	42323827	42324243	merge.DUP.732	1	1	1	1	0
chr22	42491525	42493173	merge.DUP.733	1	1	1	1	0
chr22	43432205	43432971	merge.DUP.734	1	1	1	1	0
chr22	43495097	43500470	merge.DUP.735	1	1	1	1	1
chr22	48620586	48621386	merge.DUP.736	0	1	1	1	0
chr22	48678881	48679797	merge.DUP.737	0	0	1	1	0
chr22	48757131	48757465	merge.DUP.738	1	1	1	1	0
chr22	49155768	49156171	merge.DUP.739	1	1	1	1	0
chr22	49972793	49973866	merge.DUP.740	1	1	0	1	0
chr22	50276183	50276431	merge.DUP.741	1	1	1	1	0
chr22	50643618	50644322	merge.DUP.742	1	1	1	1	1
chr3	10001	10986	merge.DUP.743	1	1	1	1	1
chr3	876229	876753	merge.DUP.744	0	1	1	1	0
chr3	990546	991057	merge.DUP.745	1	1	0	1	0
chr3	1638269	1639174	merge.DUP.746	1	1	1	1	0
chr3	3190559	3190780	merge.DUP.747	1	1	1	1	0
chr3	5565191	5565273	merge.DUP.748	1	1	1	1	0
chr3	8411683	8412744	merge.DUP.749	1	1	1	1	1
chr3	8559423	8560130	merge.DUP.750	1	1	1	1	1
chr3	10133964	10134245	merge.DUP.751	1	1	1	1	0
chr3	12563481	12563787	merge.DUP.752	1	1	1	0	0
chr3	18787888	18789032	merge.DUP.753	1	1	1	1	1
chr3	21143406	21144070	merge.DUP.754	1	1	1	0	0
chr3	32674717	32675013	merge.DUP.755	1	1	1	1	1
chr3	32945612	32945867	merge.DUP.756	1	1	1	1	1
chr3	37708653	37708698	merge.DUP.757	1	0	0	1	1
chr3	38084271	38084621	merge.DUP.758	1	1	1	1	0
chr3	41558873	41559780	merge.DUP.759	1	1	1	1	1
chr3	41890699	41891375	merge.DUP.760	1	1	0	1	0
chr3	47784286	47784585	merge.DUP.761	1	1	1	0	1
chr3	60243004	60255193	merge.DUP.762	1	1	1	1	0
chr3	60497197	60556780	merge.DUP.763	1	1	1	1	1
chr3	72337237	72337706	merge.DUP.764	1	1	1	1	0
chr3	84898528	84902154	merge.DUP.765	0	1	1	0	0
chr3	93470362	93470802	merge.DUP.766	1	1	1	1	1
chr3	102044335	102044531	merge.DUP.767	0	1	1	1	0
chr3	126861567	126865226	merge.DUP.768	1	1	1	1	1
chr3	146672618	146677381	merge.DUP.769	1	1	1	1	1
chr3	167017352	167018148	merge.DUP.770	1	1	1	1	0
chr3	172691441	172691890	merge.DUP.771	1	1	0	1	1
chr3	181134076	181134929	merge.DUP.772	1	1	0	1	1
chr3	183017581	183018543	merge.DUP.773	1	1	1	1	1
chr3	183449646	183449719	merge.DUP.774	1	0	1	1	0
chr3	184502603	184503177	merge.DUP.775	0	1	0	1	0
chr3	194324571	194325455	merge.DUP.776	1	1	1	1	0
chr3	194822581	194825704	merge.DUP.777	1	1	0	1	0
chr3	194943264	194943696	merge.DUP.778	1	1	1	1	0
chr3	195055517	195055600	merge.DUP.779	1	0	0	1	0
chr3	195710204	195711496	merge.DUP.780	1	1	1	1	0
chr3	195712737	195714443	merge.DUP.781	1	1	1	0	0
chr3	195760444	195760674	merge.DUP.782	1	1	1	1	0
chr3	195770945	195771491	merge.DUP.783	1	0	1	1	0
chr3	195778826	195788664	merge.DUP.784	1	1	1	1	1
chr3	197383988	197392355	merge.DUP.785	1	1	1	1	1
chr3	197459335	197460222	merge.DUP.786	1	1	1	1	1
chr3	198172702	198174529	merge.DUP.787	1	0	1	1	1
chr4	555017	555689	merge.DUP.788	1	1	1	1	0
chr4	566565	567056	merge.DUP.789	1	1	1	1	0
chr4	1045958	1046908	merge.DUP.790	1	1	1	1	0
chr4	1356979	1357316	merge.DUP.791	1	1	1	0	0
chr4	1397438	1398676	merge.DUP.792	1	1	1	1	1
chr4	1426012	1427010	merge.DUP.793	1	1	1	1	0
chr4	1427381	1442277	merge.DUP.794	1	1	1	1	1
chr4	1524301	1524568	merge.DUP.795	1	1	0	1	0
chr4	1624847	1625835	merge.DUP.796	0	1	1	1	0
chr4	1670856	1671660	merge.DUP.797	1	1	1	0	0
chr4	1756783	1757023	merge.DUP.798	1	1	1	1	0
chr4	3414867	3415218	merge.DUP.799	1	1	1	1	0
chr4	3509185	3509901	merge.DUP.800	1	1	1	1	1
chr4	3814756	3815946	merge.DUP.801	1	1	1	1	1
chr4	4772334	4772478	merge.DUP.802	1	1	1	1	0
chr4	6003421	6004876	merge.DUP.803	1	1	1	1	0
chr4	6511239	6512716	merge.DUP.804	1	1	1	1	0
chr4	7481883	7482879	merge.DUP.805	1	1	1	1	0
chr4	7863942	7864168	merge.DUP.806	1	1	1	1	0
chr4	16110136	16110377	merge.DUP.807	1	1	1	1	0
chr4	18611497	18612761	merge.DUP.808	1	1	0	1	1
chr4	26209531	26209920	merge.DUP.809	0	1	1	1	0
chr4	28821855	28827442	merge.DUP.810	1	1	1	1	0
chr4	33090723	33095167	merge.DUP.811	1	1	1	0	1
chr4	35202139	35203674	merge.DUP.812	1	1	1	0	0
chr4	37585147	37585656	merge.DUP.813	1	1	1	1	0
chr4	40294067	40295849	merge.DUP.814	1	1	1	1	1
chr4	49091241	49156633	merge.DUP.815	1	1	0	1	0
chr4	49263611	49290397	merge.DUP.816	1	1	1	1	1
chr4	49510095	49516711	merge.DUP.817	1	1	1	1	1
chr4	49709069	49711963	merge.DUP.818	1	1	1	1	1
chr4	59518892	59519512	merge.DUP.819	1	1	1	1	0
chr4	62687976	62688961	merge.DUP.820	1	1	1	1	0
chr4	72455787	72456433	merge.DUP.821	1	1	1	1	0
chr4	81969341	81969901	merge.DUP.822	1	1	1	1	1
chr4	92646207	92649013	merge.DUP.823	1	1	1	1	1
chr4	95224173	95263758	merge.DUP.824	1	1	1	1	0
chr4	132616725	132617165	merge.DUP.825	1	1	0	0	1
chr4	137827702	137828363	merge.DUP.826	1	1	1	1	0
chr4	146285747	146287252	merge.DUP.827	1	1	1	1	1
chr4	154148076	154157049	merge.DUP.828	1	1	1	1	0
chr4	155349248	155349308	merge.DUP.829	1	0	0	0	0
chr4	157035098	157111254	merge.DUP.830	0	1	0	1	1
chr4	166579972	166580666	merge.DUP.831	1	1	1	1	1
chr4	181239169	181241774	merge.DUP.832	1	1	1	1	0
chr4	182831806	182834655	merge.DUP.833	1	1	1	1	0
chr4	186432277	186436722	merge.DUP.834	1	1	1	1	1
chr4	186821251	186821770	merge.DUP.835	1	1	1	0	0
chr4	188151206	188154737	merge.DUP.836	1	0	1	1	0
chr4	188503154	188509628	merge.DUP.837	1	1	1	1	1
chr4	189314355	189314932	merge.DUP.838	1	1	1	1	0
chr4	189490553	189492055	merge.DUP.839	1	1	1	1	0
chr4	189557646	189557896	merge.DUP.840	1	1	1	0	0
chr4	189651563	189652669	merge.DUP.841	0	1	1	0	0
chr4	189846011	189847295	merge.DUP.842	1	1	1	1	1
chr4	189848535	189849437	merge.DUP.843	1	1	1	1	0
chr4	189881210	189881554	merge.DUP.844	1	1	1	1	1
chr5	309551	310063	merge.DUP.845	1	1	1	1	0
chr5	344331	345621	merge.DUP.846	1	1	1	1	1
chr5	391309	392511	merge.DUP.847	1	1	0	1	0
chr5	415293	415734	merge.DUP.848	1	1	1	1	0
chr5	424064	424521	merge.DUP.849	1	1	1	1	0
chr5	552117	553897	merge.DUP.850	1	1	1	1	0
chr5	648124	651438	merge.DUP.851	1	1	1	1	0
chr5	689539	847135	merge.DUP.852	1	1	1	1	0
chr5	1098055	1098824	merge.DUP.853	1	1	1	1	1
chr5	1170258	1170900	merge.DUP.854	1	1	1	1	0
chr5	1272497	1273851	merge.DUP.855	1	1	1	1	0
chr5	1326295	1329027	merge.DUP.856	1	1	1	1	0
chr5	1332867	1333834	merge.DUP.857	1	1	1	1	1
chr5	1539453	1540253	merge.DUP.858	1	1	1	1	0
chr5	1842758	1843294	merge.DUP.859	1	1	1	1	0
chr5	1867233	1867735	merge.DUP.860	1	1	1	1	0
chr5	2145277	2147062	merge.DUP.861	1	1	1	1	1
chr5	3276085	3276477	merge.DUP.862	1	1	1	1	1
chr5	3322428	3324433	merge.DUP.863	1	1	1	1	1
chr5	3392080	3392670	merge.DUP.864	1	1	1	1	0
chr5	3659932	3660277	merge.DUP.865	1	1	1	1	1
chr5	3784907	3786503	merge.DUP.866	1	1	1	1	1
chr5	4189721	4191107	merge.DUP.867	1	0	1	1	0
chr5	5304948	5305563	merge.DUP.868	1	1	1	1	1
chr5	5954654	5955407	merge.DUP.869	1	1	1	1	0
chr5	6570992	6571907	merge.DUP.870	1	0	0	1	0
chr5	6773822	6774455	merge.DUP.871	1	1	1	1	1
chr5	7262340	7269334	merge.DUP.872	0	1	1	1	0
chr5	11816599	11817466	merge.DUP.873	1	1	1	1	1
chr5	11880470	11881073	merge.DUP.874	0	1	1	1	0
chr5	12365355	12390212	merge.DUP.875	1	1	1	1	0
chr5	14347009	14347418	merge.DUP.876	1	1	1	1	0
chr5	14402988	14404111	merge.DUP.877	1	1	1	1	0
chr5	17529983	17599623	merge.DUP.878	1	1	1	1	1
chr5	17712709	17715746	merge.DUP.879	1	1	1	1	1
chr5	21477608	21497270	merge.DUP.880	1	1	1	1	1
chr5	22405254	22450551	merge.DUP.881	1	1	1	1	1
chr5	29410348	29413313	merge.DUP.882	1	1	1	1	0
chr5	32855852	32856320	merge.DUP.883	1	1	1	1	0
chr5	35713735	35714091	merge.DUP.884	1	1	1	0	0
chr5	36562331	36562619	merge.DUP.885	0	1	1	1	0
chr5	42089534	42090564	merge.DUP.886	0	1	0	1	0
chr5	45540911	45556097	merge.DUP.887	1	1	1	1	0
chr5	49599324	49650575	merge.DUP.888	1	1	1	1	0
chr5	49656262	49667433	merge.DUP.889	1	1	1	1	1
chr5	51925611	51927412	merge.DUP.890	1	1	1	0	0
chr5	61282018	61283271	merge.DUP.891	1	1	1	0	0
chr5	104063633	104070483	merge.DUP.892	1	1	1	1	1
chr5	126163569	126165023	merge.DUP.893	1	1	1	0	0
chr5	133625721	133626368	merge.DUP.894	1	1	1	1	1
chr5	134783237	134783830	merge.DUP.895	1	1	1	1	0
chr5	141173815	141180346	merge.DUP.896	1	1	1	1	0
chr5	152131194	152135137	merge.DUP.897	0	1	1	1	0
chr5	157778702	157779007	merge.DUP.898	1	1	1	1	0
chr5	168746258	168747043	merge.DUP.899	1	1	1	1	0
chr5	176061311	176061613	merge.DUP.900	1	1	0	1	0
chr5	177961157	177962741	merge.DUP.901	1	1	1	1	1
chr5	177978803	177980673	merge.DUP.902	1	1	1	1	0
chr5	178525020	178525745	merge.DUP.903	1	1	1	1	1
chr5	178585285	178585767	merge.DUP.904	1	1	1	1	1
chr5	179364235	179364617	merge.DUP.905	1	1	1	1	0
chr5	179633980	179660262	merge.DUP.906	1	1	1	1	1
chr5	180299910	180300193	merge.DUP.907	1	1	1	1	0
chr5	180302009	180302292	merge.DUP.908	1	1	1	1	0
chr5	180615133	180616167	merge.DUP.909	0	1	0	1	0
chr5	180634801	180636065	merge.DUP.910	1	0	0	1	0
chr5	180658447	180658809	merge.DUP.911	1	1	1	1	0
chr5	181045761	181046368	merge.DUP.912	1	1	1	1	1
chr6	371008	372536	merge.DUP.913	1	1	1	1	1
chr6	834343	834485	merge.DUP.914	1	1	0	1	0
chr6	861926	863787	merge.DUP.915	1	1	1	1	1
chr6	1141739	1142349	merge.DUP.916	0	1	1	1	0
chr6	1250574	1250804	merge.DUP.917	1	1	0	1	0
chr6	26042950	26043100	merge.DUP.918	1	1	1	1	0
chr6	31427300	31429853	merge.DUP.919	0	1	1	1	0
chr6	32447268	32591659	merge.DUP.920	1	1	1	1	1
chr6	34071187	34073552	merge.DUP.921	1	1	1	1	1
chr6	35169468	35169829	merge.DUP.922	0	1	1	1	0
chr6	35786780	35799014	merge.DUP.923	1	1	1	1	1
chr6	39280833	39281184	merge.DUP.924	1	1	1	1	0
chr6	41219146	41219325	merge.DUP.925	1	1	1	1	0
chr6	43738091	43738695	merge.DUP.926	1	1	1	1	0
chr6	44044437	44045602	merge.DUP.927	1	1	1	1	1
chr6	44181416	44182349	merge.DUP.928	1	1	1	1	0
chr6	44319512	44319611	merge.DUP.929	1	1	1	1	0
chr6	52785883	52826659	merge.DUP.930	1	1	0	1	0
chr6	54059861	54063913	merge.DUP.931	1	1	1	1	0
chr6	61473842	61480687	merge.DUP.932	0	1	1	1	1
chr6	68790254	68825839	merge.DUP.933	1	1	1	1	1
chr6	79827241	79901557	merge.DUP.934	1	1	1	1	1
chr6	89872383	89872434	merge.DUP.935	1	1	1	0	0
chr6	96982568	96983711	merge.DUP.936	1	1	1	1	0
chr6	105614124	105616584	merge.DUP.937	1	1	1	1	1
chr6	132600758	132601188	merge.DUP.938	1	1	1	1	0
chr6	149983638	149984563	merge.DUP.939	1	1	1	1	0
chr6	150197662	150198394	merge.DUP.940	1	1	1	1	0
chr6	157147189	157147948	merge.DUP.941	1	1	0	0	0
chr6	157310355	157314378	merge.DUP.942	1	1	1	1	1
chr6	158701137	158701539	merge.DUP.943	0	1	1	1	0
chr6	160218286	160219414	merge.DUP.944	1	1	1	1	1
chr6	163329223	163329662	merge.DUP.945	1	1	1	1	1
chr6	164948936	164960322	merge.DUP.946	1	1	1	0	0
chr6	166287736	166289201	merge.DUP.947	1	1	1	1	1
chr6	166581744	166582249	merge.DUP.948	0	1	0	1	0
chr6	166748521	166749796	merge.DUP.949	0	0	1	1	0
chr6	167421711	167424093	merge.DUP.950	1	1	1	1	0
chr6	167432891	167434935	merge.DUP.951	1	1	1	1	0
chr6	167651397	167652232	merge.DUP.952	1	1	1	1	0
chr6	167977233	167977889	merge.DUP.953	1	1	0	1	0
chr6	168560494	168562526	merge.DUP.954	1	1	1	1	0
chr6	168613592	168615774	merge.DUP.955	0	1	1	0	0
chr6	168653561	168655279	merge.DUP.956	1	1	1	1	0
chr6	168659405	168660055	merge.DUP.957	1	1	1	1	1
chr6	168839940	168841216	merge.DUP.958	1	1	1	1	0
chr6	168841717	168841902	merge.DUP.959	0	1	1	1	0
chr6	168931177	168932800	merge.DUP.960	1	1	1	1	1
chr6	169371745	169372903	merge.DUP.961	1	1	1	1	0
chr6	170087347	170088023	merge.DUP.962	1	1	1	1	1
chr6	170140965	170141351	merge.DUP.963	1	1	1	1	0
chr6	170143898	170153792	merge.DUP.964	1	1	1	1	1
chr6	170168136	170172511	merge.DUP.965	1	1	1	1	0
chr6	170246188	170247154	merge.DUP.966	1	1	1	1	0
chr6	170398297	170400321	merge.DUP.967	1	1	1	1	1
chr6	170449991	170450116	merge.DUP.968	0	1	1	1	0
chr6	170452768	170453210	merge.DUP.969	0	1	0	1	0
chr6	170465943	170467821	merge.DUP.970	1	1	0	1	0
chr6	170494856	170496889	merge.DUP.971	1	1	1	1	0
chr7	129052	129396	merge.DUP.972	1	1	1	1	0
chr7	177563	178181	merge.DUP.973	1	1	1	1	1
chr7	215225	216475	merge.DUP.974	0	0	1	1	0
chr7	237423	240566	merge.DUP.975	1	1	1	1	1
chr7	257715	258578	merge.DUP.976	1	1	0	1	0
chr7	350029	351314	merge.DUP.977	1	1	1	1	0
chr7	482868	483643	merge.DUP.978	1	1	0	1	0
chr7	588405	589076	merge.DUP.979	1	1	1	1	0
chr7	905302	906715	merge.DUP.980	1	1	1	1	1
chr7	1265398	1266841	merge.DUP.981	0	1	1	1	0
chr7	1272055	1273146	merge.DUP.982	1	1	1	1	1
chr7	1446134	1446630	merge.DUP.983	1	1	1	0	0
chr7	1758347	1758691	merge.DUP.984	1	1	1	1	0
chr7	3975875	3977442	merge.DUP.985	1	1	1	1	1
chr7	5860352	5860802	merge.DUP.986	1	1	1	1	0
chr7	11161670	11161835	merge.DUP.987	1	1	1	1	0
chr7	23503478	23504482	merge.DUP.988	1	1	1	1	0
chr7	35044326	35046252	merge.DUP.989	1	1	1	1	0
chr7	47669121	47669936	merge.DUP.990	1	1	1	1	0
chr7	52662375	52677562	merge.DUP.991	1	1	1	1	1
chr7	55166752	55167750	merge.DUP.992	1	1	0	1	0
chr7	56366834	56375185	merge.DUP.993	1	1	1	1	1
chr7	61967064	61976106	merge.DUP.994	1	1	1	0	1
chr7	71679863	71680895	merge.DUP.995	1	1	1	1	1
chr7	73967759	73967928	merge.DUP.996	0	1	1	1	1
chr7	75254656	75255172	merge.DUP.997	1	1	1	1	0
chr7	76996907	76999057	merge.DUP.998	1	1	1	1	0
chr7	91245065	91245193	merge.DUP.999	0	1	1	0	0
chr7	98784398	98856644	merge.DUP.1000	1	1	1	1	1
chr7	99219765	99220096	merge.DUP.1001	1	0	1	1	1
chr7	100179738	100183306	merge.DUP.1002	1	1	1	1	1
chr7	100952522	100959146	merge.DUP.1003	1	1	1	1	1
chr7	112752748	112755561	merge.DUP.1004	1	1	1	1	0
chr7	121740472	121740865	merge.DUP.1005	1	1	0	1	0
chr7	128798255	128798544	merge.DUP.1006	1	1	1	1	0
chr7	138230708	138230912	merge.DUP.1007	1	1	1	1	0
chr7	138650538	138650830	merge.DUP.1008	0	1	0	1	0
chr7	142302264	142421228	merge.DUP.1009	1	1	1	1	1
chr7	142450118	142526503	merge.DUP.1010	1	1	1	1	1
chr7	142558747	142565359	merge.DUP.1011	1	1	1	1	1
chr7	148330035	148331807	merge.DUP.1012	1	1	1	1	1
chr7	148936153	148936635	merge.DUP.1013	1	1	1	1	0
chr7	151854915	151855654	merge.DUP.1014	1	1	1	1	0
chr7	155084844	155088918	merge.DUP.1015	1	0	0	1	0
chr7	155328501	155330019	merge.DUP.1016	1	1	1	1	1
chr7	155334113	155336213	merge.DUP.1017	0	1	1	1	0
chr7	155341147	155341639	merge.DUP.1018	1	1	1	1	0
chr7	155350220	155350814	merge.DUP.1019	1	1	1	1	1
chr7	155406899	155408843	merge.DUP.1020	1	1	1	1	1
chr7	155792013	155793721	merge.DUP.1021	1	1	1	1	1
chr7	155891008	155893000	merge.DUP.1022	1	1	1	1	0
chr7	156101301	156101783	merge.DUP.1023	1	0	1	1	0
chr7	156264906	156267308	merge.DUP.1024	0	1	1	1	0
chr7	157656806	157658066	merge.DUP.1025	1	0	1	1	0
chr7	157725126	157726465	merge.DUP.1026	1	0	0	1	0
chr7	157776045	157777104	merge.DUP.1027	1	1	1	1	0
chr7	157836971	157837321	merge.DUP.1028	0	0	0	1	0
chr7	157924813	157925379	merge.DUP.1029	1	0	0	1	0
chr7	158098980	158099857	merge.DUP.1030	1	1	1	1	1
chr7	158146912	158149198	merge.DUP.1031	1	1	1	1	1
chr7	158151036	158151516	merge.DUP.1032	1	1	1	1	1
chr7	158158475	158159232	merge.DUP.1033	1	1	1	1	0
chr7	158166219	158166655	merge.DUP.1034	0	1	1	1	0
chr7	158314825	158315573	merge.DUP.1035	1	1	1	1	0
chr7	158329969	158342639	merge.DUP.1036	0	1	1	1	1
chr7	158343535	158343860	merge.DUP.1037	0	1	1	1	0
chr7	158348252	158348544	merge.DUP.1038	1	1	1	1	0
chr7	158360006	158361436	merge.DUP.1039	1	1	1	1	0
chr7	158385871	158386448	merge.DUP.1040	1	0	1	1	0
chr7	158508565	158508970	merge.DUP.1041	1	1	0	1	0
chr7	158521515	158522527	merge.DUP.1042	1	1	1	1	0
chr7	158523341	158524561	merge.DUP.1043	0	1	1	1	0
chr7	158648586	158648992	merge.DUP.1044	1	1	1	0	0
chr7	158667261	158668405	merge.DUP.1045	1	1	1	1	0
chr7	158915036	158917318	merge.DUP.1046	1	1	1	1	1
chr7	158950368	158951001	merge.DUP.1047	1	1	1	1	0
chr7	158997915	158998948	merge.DUP.1048	1	1	1	1	0
chr7	159017876	159018970	merge.DUP.1049	1	1	1	1	0
chr7	159088806	159089492	merge.DUP.1050	1	1	1	1	0
chr7	159202616	159203801	merge.DUP.1051	1	1	1	1	1
chr8	801935	802363	merge.DUP.1052	1	1	1	1	0
chr8	894580	895086	merge.DUP.1053	0	1	1	1	0
chr8	928967	929709	merge.DUP.1054	1	0	1	1	0
chr8	977717	978721	merge.DUP.1055	1	1	1	1	1
chr8	1022136	1024499	merge.DUP.1056	1	1	1	1	0
chr8	1033686	1036273	merge.DUP.1057	0	1	0	1	0
chr8	1215385	1216017	merge.DUP.1058	0	1	1	1	0
chr8	1384290	1385915	merge.DUP.1059	1	1	1	1	0
chr8	1464081	1464610	merge.DUP.1060	0	0	1	1	0
chr8	1470747	1471384	merge.DUP.1061	1	1	1	1	0
chr8	1641869	1644137	merge.DUP.1062	1	1	0	1	0
chr8	1832301	1833485	merge.DUP.1063	1	1	1	1	0
chr8	1844335	1844467	merge.DUP.1064	1	1	1	1	0
chr8	2085422	2086546	merge.DUP.1065	1	1	1	1	0
chr8	12010767	12018108	merge.DUP.1066	1	0	1	1	0
chr8	21766795	21767277	merge.DUP.1067	0	1	1	1	0
chr8	30388395	30388659	merge.DUP.1068	0	1	1	1	1
chr8	37645394	37645715	merge.DUP.1069	0	1	1	1	0
chr8	40820263	40821117	merge.DUP.1070	1	1	1	1	0
chr8	42884722	42884998	merge.DUP.1071	1	1	0	0	0
chr8	43238824	43242379	merge.DUP.1072	1	1	1	1	1
chr8	57202038	57219616	merge.DUP.1073	1	1	1	1	1
chr8	63216385	63264037	merge.DUP.1074	1	1	1	1	0
chr8	68906072	68907093	merge.DUP.1075	1	1	1	0	1
chr8	100426438	100426952	merge.DUP.1076	1	1	1	1	0
chr8	102943338	102944667	merge.DUP.1077	1	1	1	1	0
chr8	116749855	116750290	merge.DUP.1078	1	1	1	1	0
chr8	120919031	120920747	merge.DUP.1079	1	1	1	0	0
chr8	129495580	129497770	merge.DUP.1080	1	1	1	1	1
chr8	130048984	130050300	merge.DUP.1081	0	1	1	0	0
chr8	133213800	133214170	merge.DUP.1082	1	1	1	1	0
chr8	138205942	138207002	merge.DUP.1083	1	1	1	1	1
chr8	139591399	139594644	merge.DUP.1084	1	1	1	1	1
chr8	139747411	139748577	merge.DUP.1085	0	0	1	1	0
chr8	141492227	141493218	merge.DUP.1086	1	1	1	1	1
chr8	141540879	141541407	merge.DUP.1087	1	1	1	1	0
chr8	141779468	141779734	merge.DUP.1088	1	1	0	1	0
chr8	141871399	141874476	merge.DUP.1089	1	1	1	1	0
chr8	142012562	142013232	merge.DUP.1090	1	1	1	1	1
chr8	142082071	142083417	merge.DUP.1091	0	1	0	1	0
chr8	143661409	143662540	merge.DUP.1092	1	1	1	1	1
chr8	143669450	143670040	merge.DUP.1093	1	1	1	1	1
chr8	143988154	143988441	merge.DUP.1094	1	1	1	1	0
chr8	144125600	144126086	merge.DUP.1095	1	1	1	1	1
chr8	144233324	144233552	merge.DUP.1096	1	1	1	1	1
chr8	144380096	144382341	merge.DUP.1097	1	1	1	1	0
chr8	144513717	144513886	merge.DUP.1098	1	1	1	1	0
chr8	144686873	144688063	merge.DUP.1099	1	1	1	1	1
chr8	144695107	144695375	merge.DUP.1100	1	1	1	1	0
chr8	144767484	144768555	merge.DUP.1101	1	1	1	0	0
chr9	998542	999036	merge.DUP.1102	1	1	1	1	0
chr9	4713890	4714241	merge.DUP.1103	1	1	1	0	0
chr9	34681484	34681983	merge.DUP.1104	1	1	1	1	0
chr9	35913266	35914423	merge.DUP.1105	1	1	1	1	0
chr9	40905015	40931551	merge.DUP.1106	1	1	1	1	0
chr9	41229379	41230385	merge.DUP.1107	1	1	1	1	0
chr9	60518559	60528559	merge.DUP.1108	1	1	1	1	0
chr9	70235499	70240149	merge.DUP.1109	0	1	1	1	1
chr9	71282050	71282446	merge.DUP.1110	1	1	1	1	0
chr9	86052939	86053909	merge.DUP.1111	1	1	1	0	0
chr9	97255542	97256366	merge.DUP.1112	1	1	1	0	0
chr9	107816541	107838096	merge.DUP.1113	1	1	0	1	0
chr9	110267686	110275009	merge.DUP.1114	1	1	1	1	1
chr9	114321966	114335793	merge.DUP.1115	0	1	1	1	1
chr9	125265407	125265683	merge.DUP.1116	1	1	1	0	0
chr9	129410253	129410688	merge.DUP.1117	1	1	1	1	1
chr9	130954920	130955463	merge.DUP.1118	1	1	1	1	0
chr9	130958572	130959101	merge.DUP.1119	1	1	1	1	1
chr9	133563790	133564766	merge.DUP.1120	0	1	1	1	0
chr9	133588548	133588718	merge.DUP.1121	1	1	1	1	1
chr9	134011867	134014632	merge.DUP.1122	1	1	0	1	0
chr9	134262462	134263030	merge.DUP.1123	1	1	1	1	0
chr9	134475971	134476533	merge.DUP.1124	1	1	1	1	0
chr9	134501239	134501463	merge.DUP.1125	1	1	1	1	0
chr9	134549875	134550377	merge.DUP.1126	1	0	1	1	0
chr9	134684872	134686081	merge.DUP.1127	1	1	0	1	0
chr9	134714257	134714931	merge.DUP.1128	0	1	1	1	0
chr9	134729419	134729862	merge.DUP.1129	1	1	1	1	0
chr9	135350035	135350254	merge.DUP.1130	1	1	1	1	0
chr9	135990714	135990946	merge.DUP.1131	1	1	1	1	0
chr9	136528376	136528581	merge.DUP.1132	1	1	1	1	0
chr9	136534814	136535067	merge.DUP.1133	1	0	1	1	0
chr9	136535433	136536056	merge.DUP.1134	1	1	1	1	1
chr9	136632068	136633321	merge.DUP.1135	1	1	1	1	0
chr9	136802768	136803318	merge.DUP.1136	1	1	1	1	0
chr9	137101825	137104066	merge.DUP.1137	1	1	1	1	1
chr9	137327620	137328494	merge.DUP.1138	1	1	1	1	1
chr9	137328572	137330659	merge.DUP.1139	1	1	1	1	0
chr9	137355408	137355736	merge.DUP.1140	1	1	1	1	1
chr9	137378842	137379553	merge.DUP.1141	1	1	1	1	0
chr9	137669316	137669581	merge.DUP.1142	1	1	1	1	0
chr9	137716006	137716583	merge.DUP.1143	1	1	1	1	1
chr9	137721128	137721682	merge.DUP.1144	1	1	1	1	1
chr9	137845054	137846490	merge.DUP.1145	1	1	1	1	1
chr9	137948998	137949548	merge.DUP.1146	1	1	0	1	0
chr9	138231351	138233529	merge.DUP.1147	1	1	1	1	1
chrM	1	16571	merge.DUP.1148	1	1	1	1	1
chrX	944476	946039	merge.DUP.1149	1	1	1	1	0
chrX	6795016	6813061	merge.DUP.1150	1	1	1	1	0
chrX	9404132	9414718	merge.DUP.1151	1	1	1	1	1
chrX	25815060	25815576	merge.DUP.1152	1	1	1	1	0
chrX	30644232	30644319	merge.DUP.1153	1	1	1	1	0
chrX	48671089	48671519	merge.DUP.1154	1	1	1	1	0
chrX	49017245	49019098	merge.DUP.1155	1	1	1	1	0
chrX	50057375	50057699	merge.DUP.1156	1	1	1	1	1
chrX	102559238	102559923	merge.DUP.1157	1	1	1	1	0
chrX	122741432	122742107	merge.DUP.1158	0	1	0	1	0
chrX	123529250	123531023	merge.DUP.1159	0	1	1	1	0
chrX	140723222	140725519	merge.DUP.1160	1	1	1	1	1
chrX	141000596	141012593	merge.DUP.1161	1	1	1	1	1
chrX	144425004	144425608	merge.DUP.1162	1	1	1	0	1
chrX	147279105	147287195	merge.DUP.1163	1	1	1	1	1
chrX	153382490	153383921	merge.DUP.1164	1	1	1	1	1
chrY	11066164	11068193	merge.DUP.1165	1	1	1	1	1
chrY	11290839	11303640	merge.DUP.1166	1	1	1	1	1
chrY	11304125	11334436	merge.DUP.1167	1	1	1	1	1
chrY	56825768	56837128	merge.DUP.1168	1	1	1	1	0

## Sheet: Breakpoint
Table S9. Summary of breakpoints detected in K562 scNanoCT&ATAC-seq data.
Chrom1	Position1	Chrom2	Position2	SVID	Gene1	Gene2	Supported by ONT WGS data
chr13	108009000	chr9	131280000	merge.BND.1	.	FAM78A	1
chr22	23291000	chr9	130732000	merge.BND.2	BCR	ABL1	1
chr14	105478000	chr6	167424000	merge.BND.3	CRIP2	.	1
chr21	43336000	chr9	130959000	merge.BND.4	.	.	1
chr21	43338000	chr9	130959000	merge.BND.5	.	.	1
chr14	89361000	chr7	158595000	merge.BND.6	FOXN3	.	1
chr11	93137000	chr22	22361000	merge.BND.7	.	.	1
chr1	223559000	chr2	46879000	merge.BND.8	CAPN8	.	1
chr13	113723000	chr22	50340000	merge.BND.9	GRK1	.	1
chr17	118000	chr9	138233000	merge.BND.10	ENSG00000280136	ENSG00000290585	1
chr1	223609000	chr2	46878000	merge.BND.11	CAPN8	.	1
chr10	133690000	chrY	10910000	merge.BND.12	.	.	0
chr13	113673000	chr22	50338000	merge.BND.13	GRK1	.	1
chr16	33959000	chr22	22361000	merge.BND.14	.	.	1
chr17	21814000	chr7	63017000	merge.BND.15	.	.	1
chr14	100167000	chr17	489000	merge.BND.16	.	.	1
chr10	133683000	chr18	107000	merge.BND.17	.	.	1
chr20	28557000	chrX	68654000	merge.BND.18	.	STARD8	1
chr14	100169000	chr17	448000	merge.BND.19	.	.	1
chr20	64287000	chr4	190120000	merge.BND.20	PCMTD2	.	1
chr12	107914000	chrX	125962000	merge.BND.21	.	.	1
chr11	126276000	chr6	44182000	merge.BND.22	FOXRED1	CAPN11	0
chr17	81533000	chr22	20252000	merge.BND.23	FSCN2	RTN4R	1
chr21	10416000	chr22	11057000	merge.BND.24	ENSG00000290523	.	1
chr21	10458000	chrY	56855000	merge.BND.25	BAGE2	.	1
chr22	20164000	chr8	143411000	merge.BND.26	.	.	1
chr2	5024000	chr3	38085000	merge.BND.27	.	DLEC1	1
chr10	99841000	chr5	142000000	merge.BND.28	ABCC2	GNPDA1	1
chr1	37776000	chr19	11311000	merge.BND.29	.	TSPAN16	1
chr10	43423000	chr19	53189000	merge.BND.30	.	ZNF665	1
chr17	43024000	chr2	4945000	merge.BND.31	VAT1	.	0
chr14	104807000	chr17	80316000	merge.BND.32	.	RNF213	1
chr1	151600000	chr7	29792000	merge.BND.33	.	.	1
chr1	41545000	chr21	44420000	merge.BND.34	HIVEP3	TRPM2	1
chr2	241864000	chr9	134183000	merge.BND.35	.	.	0
chr21	43336000	chr9	129411000	merge.BND.36	.	.	1
chr22	16819000	chr9	131199000	merge.BND.37	XKR3	NUP214	1
chr10	80536000	chr16	75469000	merge.BND.38	TSPAN14-AS1	.	1
chr14	89362000	chr7	158595000	merge.BND.39	FOXN3	.	1
chr1	41546000	chrX	3524000	merge.BND.40	HIVEP3	.	1
chr8	142257000	chr9	130959000	merge.BND.41	TSNARE1	.	1
chr10	128465000	chr3	126862000	merge.BND.42	.	CHCHD6	0
chr12	95843000	chr6	37768000	merge.BND.43	SNRPF-DT	.	1
chr2	208177000	chr4	81970000	merge.BND.44	C2orf80	RASGEF1B	1
chr22	22361000	chr8	72882000	merge.BND.45	.	KCNB2	1
chr11	67832000	chr16	33959000	merge.BND.46	ENPP7P7	.	1
chr12	124094000	chr9	130955000	merge.BND.47	RFLNA	.	1
chr1	223081000	chr22	50338000	merge.BND.48	.	.	0
chr11	356000	chr2	46879000	merge.BND.49	.	.	0
chr1	223081000	chr2	20166000	merge.BND.50	.	.	0
chr21	8447000	chr22	21580000	merge.BND.51	ENSG00000280441	UBE2L3	1
chr10	42110000	chr17	21290000	merge.BND.52	.	MAP2K3	0
chr16	79831000	chr19	29902000	merge.BND.53	.	.	1
chr12	42083000	chr8	14489000	merge.BND.54	GXYLT1	SGCZ	1
chr21	10415000	chr7	152401000	merge.BND.55	ENSG00000290523	KMT2C	1
chr3	38085000	chr5	11881000	merge.BND.56	DLEC1	CTNND2	1
chr10	132821000	chr2	20165000	merge.BND.57	CFAP46	.	0
chr2	5022000	chr3	38084000	merge.BND.58	.	DLEC1	1
chr14	101608000	chr15	29559000	merge.BND.59	DIO3OS	ENTREP2	1
chr20	63949000	chr4	3415000	merge.BND.60	UCKL1	RGS12	0
chr10	3042000	chr17	28225000	merge.BND.61	.	.	1
chr1	33051000	chr6	2920000	merge.BND.62	AK2	.	1
chr5	129147000	chr9	13013000	merge.BND.63	.	ENSG00000285637	1
chr17	20092000	chr2	208169000	merge.BND.64	SPECC1	C2orf80	1
chr18	4511000	chr5	168746000	merge.BND.65	.	SLIT3	1
chr21	10274000	chr22	18897000	merge.BND.66	.	.	1
chr10	100092000	chr3	12655000	merge.BND.67	.	RAF1	0
chr12	95840000	chr6	37768000	merge.BND.68	SNRPF-DT	.	1
chr1	71896000	chr2	102296000	merge.BND.69	NEGR1	.	1
chr21	33321000	chr8	129496000	merge.BND.70	.	CCDC26	1
chr8	142255000	chr9	130959000	merge.BND.71	TSNARE1	.	1
chr14	89363000	chr7	158595000	merge.BND.72	FOXN3	.	1
chr1	247363000	chr7	75255000	merge.BND.73	ENSG00000289728	.	0
chr11	68889000	chr3	13612000	merge.BND.74	.	FBLN2	1
chr2	161282000	chr21	8989000	merge.BND.75	PSMD14-DT	.	1
chr22	20164000	chr7	98812000	merge.BND.76	.	.	1
chr22	23428000	chr7	1877000	merge.BND.77	.	ENSG00000286192	0
chr13	18212000	chr21	10274000	merge.BND.78	FAM230C	.	1
chr1	167056000	chr2	241866000	merge.BND.79	GPA33	.	0
chr11	1599000	chr3	152891000	merge.BND.80	KRTAP5-AS1	.	0
chr11	64553000	chr21	43336000	merge.BND.81	.	.	1
chr11	8818000	chr4	108409000	merge.BND.82	DENND2B	.	1
chr3	134580000	chr6	36946000	merge.BND.83	ENSG00000288700	.	1
chr10	80533000	chr16	75469000	merge.BND.84	TSPAN14	.	1
chr11	62074000	chr14	81320000	merge.BND.85	LINC02733	STON2	1
chr11	8818000	chr8	116678000	merge.BND.86	DENND2B	EIF3H	1
chr1	30732000	chr11	133739000	merge.BND.87	ENSG00000287510	.	1
chr10	133690000	chrY	11304000	merge.BND.88	.	.	0
chr10	95092000	chrX	30773000	merge.BND.89	.	.	0
chr19	58608000	chrX	156029000	merge.BND.90	.	.	1
chr4	76919000	chr8	145028000	merge.BND.91	ENSG00000289586	.	1
chr6	169373000	chr9	134183000	merge.BND.92	LINC02519	.	0
chr1	113598000	chr11	56708000	merge.BND.93	MAGI3	.	0
chr1	234207000	chr4	18613000	merge.BND.94	SLC35F3	ENSG00000286046	1
chr1	248946000	chr4	190117000	merge.BND.95	.	.	0
chr21	8812000	chr4	49510000	merge.BND.96	ENSG00000286033	.	0
chr22	10743000	chrY	56890000	merge.BND.97	.	.	1
chr3	32043000	chr5	52531000	merge.BND.98	OSBPL10	.	1
chr11	71563000	chr7	136668000	merge.BND.99	.	.	0
chr11	82162000	chr9	35884000	merge.BND.100	MIR4300HG	.	1
chr12	27712000	chr19	24012000	merge.BND.101	MRPS35	.	0
chr15	18341000	chr9	63764000	merge.BND.102	.	.	1
chr22	36873000	chr7	73968000	merge.BND.103	NCF4	.	1
chr17	21668000	chr20	29630000	merge.BND.104	.	.	1
chr19	34246000	chr3	33100000	merge.BND.105	.	.	1
chr1	159667000	chr19	24082000	merge.BND.106	.	ZNF254	1
chr20	29369000	chr4	189980000	merge.BND.107	.	ENSG00000271307	1
chr21	19075000	chr22	10743000	merge.BND.108	.	.	1
chr11	8978000	chr19	23828000	merge.BND.109	NRIP3	ENSG00000267924	0
chr14	104807000	chr17	80314000	merge.BND.110	.	RNF213	0
chr15	91750000	chr4	40296000	merge.BND.111	.	.	1
chr22	32532000	chr6	24684000	merge.BND.112	SYN3	ACOT13	0
chr15	49051000	chr5	52531000	merge.BND.113	.	.	1
chr21	10270000	chr22	18890000	merge.BND.114	.	FAM230F	1
chr22	22361000	chr6	110156000	merge.BND.115	.	WASF1	1
chr10	45000	chr20	29369000	merge.BND.116	ENSG00000237297	.	1
chr10	69214000	chr5	109343000	merge.BND.117	.	PJA2	1
chr10	86090000	chr3	48187000	merge.BND.118	GRID1	CDC25A	1
chr11	64553000	chr8	142256000	merge.BND.119	.	TSNARE1	0
chr12	133265000	chr3	198173000	merge.BND.120	.	ENSG00000290937	1
chr13	113673000	chr22	50339000	merge.BND.121	GRK1	.	1
chr13	30843000	chr20	36396000	merge.BND.122	.	DLGAP4	1
chr1	28189000	chr19	23845000	merge.BND.123	PTAFR	ENSG00000267924	1
chr22	22361000	chr3	152594000	merge.BND.124	.	.	1
chr2	150883000	chr22	22485000	merge.BND.125	.	ZNF280B	1
chr2	32871000	chr3	12655000	merge.BND.126	LINC00486	RAF1	0
chr6	169372000	chr9	134186000	merge.BND.127	LINC02519	.	0
chr14	89363000	chr7	155893000	merge.BND.128	FOXN3	.	1
chr16	21220000	chr7	42806000	merge.BND.129	.	.	1
chr16	31104000	chr8	145028000	merge.BND.130	.	.	0
chr1	33053000	chr6	2920000	merge.BND.131	AK2	.	1
chr21	43338000	chr8	142255000	merge.BND.132	.	TSNARE1	0
chr2	132276000	chr20	30503000	merge.BND.133	.	.	0
chr10	108730000	chr2	4410000	merge.BND.134	LINC02661	ENSG00000291325	0
chr16	74811000	chr7	20670000	merge.BND.135	.	ABCB5	0
chr1	9060000	chr18	70465000	merge.BND.136	SLC2A5	ENSG00000288828	1
chr2	231005000	chr4	8816000	merge.BND.137	SPATA3	.	1
chr2	26333000	chr4	89724000	merge.BND.138	SELENOI	SNCA	1
chr14	39064000	chr20	2823000	merge.BND.139	SEC23A	.	1
chr16	79831000	chr19	29898000	merge.BND.140	.	.	1
chr18	107000	chr4	190077000	merge.BND.141	.	.	0
chr1	110121000	chr21	43336000	merge.BND.142	.	.	1
chr1	202246000	chr6	168842000	merge.BND.143	LGR6	.	0
chr21	29118000	chr7	69338000	merge.BND.144	MAP3K7CL	ENSG00000225718	1
chr22	36872000	chr7	73968000	merge.BND.145	NCF4	.	1
chr3	196811000	chr4	137828000	merge.BND.146	PAK2	.	1
chr12	33864000	chr13	48283000	merge.BND.147	.	.	1
chr13	34803000	chr9	86587000	merge.BND.148	.	.	1
chr18	107000	chrY	56836000	merge.BND.149	.	.	1
chr1	110120000	chr21	43338000	merge.BND.150	.	.	1
chr21	10360000	chr22	18892000	merge.BND.151	.	FAM230F	1
chr22	11813000	chr4	49510000	merge.BND.152	.	.	0
chr22	22749000	chr9	92604000	merge.BND.153	.	CENPP	0
chr10	69214000	chr5	109341000	merge.BND.154	.	PJA2	1
chr12	108579000	chr22	43496000	merge.BND.155	.	MPPED1	1
chr19	58608000	chrY	57215000	merge.BND.156	.	.	0
chr1	5388000	chr13	30842000	merge.BND.157	.	.	1
chr21	46135000	chrX	156020000	merge.BND.158	.	ENSG00000270726	1
chr11	71520000	chr3	152892000	merge.BND.159	NADSYN1	.	0
chr12	2683000	chr3	194328000	merge.BND.160	CACNA1C	.	0
chr12	2720000	chr20	58197000	merge.BND.161	ITFG2-AS1	.	0
chr16	78226000	chr6	38140000	merge.BND.162	WWOX	ZFAND3	1
chr17	21668000	chr7	57716000	merge.BND.163	.	.	1
chr18	4511000	chr5	168747000	merge.BND.164	.	SLIT3	1
chr1	2325000	chr4	137828000	merge.BND.165	MORN1	.	0
chr1	247363000	chr11	69917000	merge.BND.166	ENSG00000289728	.	0
chr1	88507000	chr17	33737000	merge.BND.167	PKN2-AS1	ASIC2	1
chr21	8446000	chr6	16752000	merge.BND.168	ENSG00000280441	ATXN1	0
chr2	111252000	chr21	43336000	merge.BND.169	MIR4435-2HG	.	1
chr4	79973000	chr5	21208000	merge.BND.170	ANTXR2	.	1
chr7	132564000	chr9	15127000	merge.BND.171	PLXNA4	ENSG00000291185	1
chr11	64595000	chr20	38195000	merge.BND.172	SLC22A12	.	1
chr14	105478000	chr6	167422000	merge.BND.173	CRIP2	.	1
chr17	21290000	chr7	65582000	merge.BND.174	MAP2K3	.	0
chr17	81532000	chr20	62382000	merge.BND.175	FSCN2	.	0
chr19	44547000	chr22	16801000	merge.BND.176	CEACAM22P	XKR3	1
chr21	10415000	chr22	10785000	merge.BND.177	ENSG00000290523	.	0
chr2	240640000	chr6	834000	merge.BND.178	.	.	1
chr4	190123000	chr8	145075000	merge.BND.179	.	.	0
chr11	71087000	chr5	32856000	merge.BND.180	SHANK2	.	1
chr12	124440000	chr19	49168000	merge.BND.181	NCOR2	TRPM4	1
chr12	126832000	chr7	132564000	merge.BND.182	.	PLXNA4	0
chr13	113723000	chr22	50339000	merge.BND.183	GRK1	.	0
chr14	89363000	chr22	43497000	merge.BND.184	FOXN3	MPPED1	1
chr1	10000	chr7	159336000	merge.BND.185	.	.	0
chr1	41545000	chr8	100427000	merge.BND.186	HIVEP3	ENSG00000253824	0
chr1	46240000	chr19	11311000	merge.BND.187	.	TSPAN16	1
chr3	12655000	chr5	176963000	merge.BND.188	RAF1	UIMC1	0
chr5	11817000	chr7	157777000	merge.BND.189	CTNND2	PTPRN2	0
chr8	9772000	chrY	11066000	merge.BND.190	TNKS	.	1
chr10	99841000	chr16	79831000	merge.BND.191	ABCC2	.	0
chr13	30844000	chr20	36397000	merge.BND.192	.	DLGAP4	0
chr13	43496000	chr15	41579000	merge.BND.193	ENOX1	TYRO3	1
chr14	34047000	chr19	43813000	merge.BND.194	EGLN3	LYPD5	0
chr16	85611000	chr21	8446000	merge.BND.195	GSE1	ENSG00000280441	0
chr1	19061000	chr19	48670000	merge.BND.196	.	SEC1P	0
chr1	54726000	chr18	25908000	merge.BND.197	MROH7-TTC4	.	1
chr1	58632000	chr2	31823000	merge.BND.198	.	KRT18P52	1
chr20	63443000	chr4	8816000	merge.BND.199	KCNQ2	.	1
chr22	11069000	chr7	152417000	merge.BND.200	.	KMT2C	1
chr3	106110000	chr5	142000000	merge.BND.201	.	GNPDA1	1
chr5	49599000	chrY	11319000	merge.BND.202	.	.	1
chr6	28713000	chrX	98849000	merge.BND.203	.	LINC03077	1
chr10	128464000	chr3	126864000	merge.BND.204	.	CHCHD6	1
chr10	128464000	chr3	126865000	merge.BND.205	.	CHCHD6	1
chr11	62074000	chr8	116678000	merge.BND.206	LINC02733	EIF3H	1
chr13	60888000	chr7	25048000	merge.BND.207	LINC00378	.	1
chr14	104807000	chr17	80313000	merge.BND.208	.	RNF213	0
chr1	113184000	chr11	1599000	merge.BND.209	.	KRTAP5-AS1	0
chr20	30425000	chrX	68654000	merge.BND.210	.	STARD8	0
chr22	11704000	chr4	49510000	merge.BND.211	.	.	0
chr2	208169000	chr4	76919000	merge.BND.212	C2orf80	ENSG00000289586	1
chr4	49712000	chrY	56838000	merge.BND.213	.	.	1
chr11	11247000	chr15	85896000	merge.BND.214	.	.	1
chr12	127154000	chr2	41383000	merge.BND.215	ENSG00000286016	.	1
chr13	21726000	chr21	43336000	merge.BND.216	.	.	1
chr13	30842000	chr20	36396000	merge.BND.217	.	DLGAP4	1
chr14	99953000	chr8	142256000	merge.BND.218	.	TSNARE1	1
chr18	49811000	chr2	41746000	merge.BND.219	ENSG00000266997	.	1
chr19	55434000	chr21	41673000	merge.BND.220	SHISA7	.	0
chr1	113184000	chr11	71563000	merge.BND.221	.	.	0
chr20	64287000	chr21	46135000	merge.BND.222	PCMTD2	.	0
chr21	32428000	chr3	75414000	merge.BND.223	EVA1C	FAM86DP	1
chr2	238487000	chr20	28557000	merge.BND.224	.	.	1
chr2	3297000	chr6	44181000	merge.BND.225	EIPR1	CAPN11	0
chr4	49246000	chr9	64135000	merge.BND.226	.	.	1
chr4	76916000	chr8	145028000	merge.BND.227	ENSG00000289586	.	1
chr6	169372000	chr7	157658000	merge.BND.228	LINC02519	PTPRN2	0
chr6	32538000	chrX	72733000	merge.BND.229	.	.	1
chr10	133690000	chrY	56839000	merge.BND.230	.	.	0
chr11	65465000	chr3	10134000	merge.BND.231	ENSG00000291174	.	0
chr16	33959000	chr4	146304000	merge.BND.232	.	SLC10A7	1
chr16	75469000	chr20	36999000	merge.BND.233	.	RBL1	0
chr17	50041000	chr2	30596000	merge.BND.234	.	LCLAT1	0
chr17	5056000	chr6	31856000	merge.BND.235	.	.	1
chr18	107000	chr4	190074000	merge.BND.236	.	.	0
chr21	46135000	chrY	57206000	merge.BND.237	.	ENSG00000292369	1
chr22	43496000	chr7	158595000	merge.BND.238	MPPED1	.	0
chr4	49102000	chr5	49603000	merge.BND.239	.	.	0
chr6	79375000	chrX	52929000	merge.BND.240	.	FAM156A	1
chr12	133265000	chr18	80258000	merge.BND.241	.	.	0
chr12	85727000	chr3	49404000	merge.BND.242	.	RHOA	1
chr13	113673000	chr22	50337000	merge.BND.243	GRK1	.	0
chr15	50886000	chr19	17416000	merge.BND.244	ENSG00000273674	MVB12A	1
chr18	37284000	chr2	241517000	merge.BND.245	CELF4	.	0
chr1	18050000	chr15	45464000	merge.BND.246	.	SLC30A4-AS1	1
chr1	41545000	chr13	35959000	merge.BND.247	HIVEP3	DCLK1	0
chr1	41546000	chr21	10427000	merge.BND.248	HIVEP3	ENSG00000290523	0
chr1	88507000	chr17	33738000	merge.BND.249	PKN2-AS1	ASIC2	1
chr1	9411000	chr18	4511000	merge.BND.250	.	.	1
chr2	102296000	chr5	39788000	merge.BND.251	.	.	1
chr2	5022000	chr5	11881000	merge.BND.252	.	CTNND2	0
chr3	75670000	chrY	11309000	merge.BND.253	RPL23AP49	.	1
chr7	157657000	chr9	134186000	merge.BND.254	PTPRN2	.	0
chr8	142256000	chr9	130959000	merge.BND.255	TSNARE1	.	1
chr11	67701000	chr3	32043000	merge.BND.256	.	OSBPL10	0
chr18	107000	chr4	190087000	merge.BND.257	.	.	0
chr1	111354000	chr10	100276000	merge.BND.258	CHIAP3	BLOC1S2	0
chr1	3352000	chr14	101783000	merge.BND.259	PRDM16	PPP2R5C	0
chr20	36999000	chr7	5856000	merge.BND.260	RBL1	.	1
chr2	104825000	chr22	20164000	merge.BND.261	PANTR1	.	1
chr2	241866000	chr6	169373000	merge.BND.262	.	LINC02519	0
chr10	133690000	chrY	56840000	merge.BND.263	.	.	0
chr10	17548000	chr12	85727000	merge.BND.264	.	.	1
chr11	39272000	chr12	107914000	merge.BND.265	.	.	0
chr11	8818000	chr2	128417000	merge.BND.266	DENND2B	.	1
chr12	2721000	chr20	58197000	merge.BND.267	ITFG2-AS1	.	0
chr12	94018000	chr14	63802000	merge.BND.268	.	SYNE2	1
chr14	52201000	chr4	169360000	merge.BND.269	.	.	1
chr16	86665000	chr6	122850000	merge.BND.270	ENSG00000261161	.	1
chr18	107000	chr4	190084000	merge.BND.271	.	.	0
chr1	178983000	chrX	49140000	merge.BND.272	.	.	1
chr1	230332000	chr19	55435000	merge.BND.273	PGBD5	SHISA7	1
chr1	236498000	chr5	160091000	merge.BND.274	EDARADD	PWWP2A	0
chr1	32720000	chr11	72601000	merge.BND.275	ENSG00000224409	PDE2A	0
chr20	4447000	chr6	136950000	merge.BND.276	.	.	1
chr21	43336000	chr8	143410000	merge.BND.277	.	.	1
chr6	37856000	chr7	41137000	merge.BND.278	ZFAND3	.	1
chr10	99837000	chr5	142000000	merge.BND.279	ABCC2	GNPDA1	1
chr11	121329000	chr7	150911000	merge.BND.280	.	.	0
chr11	77193000	chr19	14596000	merge.BND.281	MYO7A	CLEC17A	0
chr12	117377000	chrX	141427000	merge.BND.282	NOS1	SPANXA2-OT1	1
chr12	133265000	chr4	190122000	merge.BND.283	.	.	0
chr14	19488000	chr22	15627000	merge.BND.284	MED15P6	NF1P6	1
chr14	81320000	chr2	128418000	merge.BND.285	STON2	.	0
chr16	20000	chr4	190120000	merge.BND.286	ENSG00000260803	.	0
chr17	81250000	chr19	15581000	merge.BND.287	SLC38A10	CYP4F23P	0
chr17	81798000	chr22	23854000	merge.BND.288	.	.	0
chr19	19116000	chr9	22414000	merge.BND.289	.	.	1
chr19	50500000	chr22	38110000	merge.BND.290	ENSG00000289950	BAIAP2L2	1
chr19	77000	chr20	60000	merge.BND.291	FAM138F	.	1
chr1	113598000	chr11	56698000	merge.BND.292	MAGI3	.	0
chr2	113578000	chr20	60000	merge.BND.293	FAM138B	.	1
chr3	112728000	chr8	78958000	merge.BND.294	.	.	0
chr5	51101000	chr7	41137000	merge.BND.295	.	.	1
chr7	158442000	chr8	142186000	merge.BND.296	PTPRN2	.	1
chr10	103251000	chr14	89363000	merge.BND.297	NT5C2	FOXN3	0
chr10	132821000	chr22	50341000	merge.BND.298	CFAP46	.	0
chr11	119648000	chr8	142256000	merge.BND.299	USP2-AS1	TSNARE1	0
chr12	108579000	chr9	401000	merge.BND.300	.	DOCK8	0
chr12	22034000	chr19	34923000	merge.BND.301	.	ZNF30-AS1	0
chr13	22970000	chr14	104499000	merge.BND.302	.	TMEM179	1
chr13	81794000	chr5	142077000	merge.BND.303	.	.	1
chr14	59751000	chr6	166289000	merge.BND.304	RTN1	.	1
chr16	33953000	chr22	22361000	merge.BND.305	.	.	1
chr16	34159000	chr22	11631000	merge.BND.306	LINC00273	.	1
chr17	16127000	chr4	134645000	merge.BND.307	NCOR1	.	1
chr17	21290000	chr7	65114000	merge.BND.308	MAP2K3	.	0
chr17	33737000	chr19	29898000	merge.BND.309	ASIC2	.	1
chr17	44129000	chr4	29646000	merge.BND.310	.	.	1
chr18	36464000	chr7	11162000	merge.BND.311	FHOD3	PHF14	1
chr1	212801000	chr12	110866000	merge.BND.312	TATDN3	CCDC63	1
chr1	214834000	chr21	16973000	merge.BND.313	.	.	1
chr1	248519000	chr2	31835000	merge.BND.314	OR2G6	.	0
chr1	248753000	chr16	71385000	merge.BND.315	LYPD8	LINC02136	0
chr1	51962000	chrX	68328000	merge.BND.316	RAB3B	OPHN1	0
chr20	13934000	chr5	133626000	merge.BND.317	SEL1L2	.	1
chr20	36315000	chr22	50339000	merge.BND.318	DLGAP4	.	0
chr20	36315000	chr22	50340000	merge.BND.319	DLGAP4	.	0
chr20	63102000	chrX	25815000	merge.BND.320	HAR1B	.	0
chr22	23429000	chr7	1877000	merge.BND.321	.	ENSG00000286192	0
chr2	239867000	chr20	28557000	merge.BND.322	.	.	0
chr3	23931000	chr7	29792000	merge.BND.323	NKIRAS1	.	1
chr4	8816000	chr8	142255000	merge.BND.324	.	TSNARE1	1
chr5	159923000	chrX	67763000	merge.BND.325	ADRA1B	.	1
chr6	70992000	chr8	1761000	merge.BND.326	.	CLN8	0
chr10	132365000	chr5	3785000	merge.BND.327	LRRC27	ENSG00000288978	1
chr13	113723000	chrX	68653000	merge.BND.328	GRK1	STARD8	0
chr13	27064000	chr2	7489000	merge.BND.329	.	.	1
chr14	104807000	chr17	80315000	merge.BND.330	.	RNF213	0
chr14	64981000	chr2	193680000	merge.BND.331	CHURC1-FNTB	.	1
chr15	54932000	chr6	147842000	merge.BND.332	.	ENSG00000227681	1
chr16	34063000	chrY	11321000	merge.BND.333	.	.	1
chr16	90117000	chr9	138233000	merge.BND.334	FAM157C	ENSG00000290585	0
chr18	45734000	chr3	20301000	merge.BND.335	SLC14A1	SGO1-AS1	1
chr19	55267000	chr21	43336000	merge.BND.336	HSPBP1	.	1
chr19	7601000	chr5	180135000	merge.BND.337	CAMSAP3	RASGEF1C	1
chr20	64287000	chr8	145079000	merge.BND.338	PCMTD2	.	1
chr21	43338000	chr9	129410000	merge.BND.339	.	.	1
chr22	43497000	chr7	155891000	merge.BND.340	MPPED1	.	1
chr2	10399000	chr21	43338000	merge.BND.341	HPCAL1	.	1
chr2	240641000	chr6	834000	merge.BND.342	.	.	1
chr2	47583000	chr22	23856000	merge.BND.343	MSH2	.	1
chr3	72337000	chrX	68653000	merge.BND.344	.	STARD8	0
chr4	188217000	chr8	6679000	merge.BND.345	.	MCPH1-AS1	1
chr5	24371000	chrX	67763000	merge.BND.346	.	.	0
chr5	49599000	chrY	11331000	merge.BND.347	.	.	0
chr8	145075000	chrX	156020000	merge.BND.348	.	ENSG00000270726	0
chr10	133787000	chr18	80258000	merge.BND.349	.	.	1
chr10	3042000	chr5	77044000	merge.BND.350	.	ENSG00000285000	0
chr10	31969000	chr11	66395000	merge.BND.351	.	.	0
chr10	47181000	chrX	81673000	merge.BND.352	.	.	0
chr11	1916000	chr14	100169000	merge.BND.353	.	.	1
chr11	8818000	chrX	45042000	merge.BND.354	DENND2B	KDM6A	0
chr12	127154000	chr5	8417000	merge.BND.355	ENSG00000286016	ENSG00000249159	0
chr12	9480000	chrX	42888000	merge.BND.356	ENSG00000284634	.	1
chr14	100168000	chr17	489000	merge.BND.357	.	.	0
chr14	65792000	chr5	149656000	merge.BND.358	.	.	0
chr14	89361000	chr6	167591000	merge.BND.359	FOXN3	.	1
chr15	34376000	chrX	117418000	merge.BND.360	.	.	1
chr15	40562000	chr6	116454000	merge.BND.361	CCDC32	ENSG00000285446	0
chr17	74734000	chr5	149656000	merge.BND.362	RAB37	.	0
chr17	81796000	chr7	1145000	merge.BND.363	.	.	1
chr18	78238000	chrX	68653000	merge.BND.364	.	STARD8	1
chr19	2016000	chr5	3276000	merge.BND.365	BTBD2	.	0
chr1	41545000	chr6	3222000	merge.BND.366	HIVEP3	.	0
chr1	41546000	chr6	3222000	merge.BND.367	HIVEP3	.	0
chr1	51962000	chr17	27211000	merge.BND.368	RAB3B	.	0
chr20	37002000	chr7	5856000	merge.BND.369	RBL1	.	1
chr20	63102000	chr9	133564000	merge.BND.370	HAR1B	ADAMTSL2	0
chr22	12179000	chr4	49510000	merge.BND.371	.	.	0
chr22	22132000	chrY	5606000	merge.BND.372	.	PCDH11Y	1
chr22	50338000	chr6	167555000	merge.BND.373	.	.	1
chr4	155539000	chr5	35714000	merge.BND.374	.	SPEF2	1
chr4	5706000	chrX	946000	merge.BND.375	EVC2	.	1
chr9	129443000	chrX	72734000	merge.BND.376	ENSG00000230676	.	0
chr10	3042000	chr5	77042000	merge.BND.377	.	ENSG00000285000	0
chr10	73898000	chr7	72242000	merge.BND.378	.	CALN1	0
chr11	102731000	chr18	11248000	merge.BND.379	.	.	0
chr11	126276000	chr16	10653000	merge.BND.380	FOXRED1	TEKT5	0
chr12	107282000	chr13	31754000	merge.BND.381	.	RXFP2	1
chr12	22033000	chr19	34923000	merge.BND.382	.	ZNF30-AS1	0
chr12	56596000	chr15	39702000	merge.BND.383	BAZ2A	FSIP1	1
chr14	91635000	chr6	39436000	merge.BND.384	CATSPERB	KIF6	1
chr16	819000	chr17	81532000	merge.BND.385	ENSG00000287855	FSCN2	1
chr16	85611000	chr21	8219000	merge.BND.386	GSE1	ENSG00000278996	1
chr16	90118000	chr9	138231000	merge.BND.387	FAM157C	ENSG00000290585	0
chr17	81533000	chr19	55267000	merge.BND.388	FSCN2	HSPBP1	1
chr18	107000	chr4	190067000	merge.BND.389	.	DBET	0
chr18	107000	chrY	11304000	merge.BND.390	.	.	0
chr19	11311000	chr9	120495000	merge.BND.391	TSPAN16	CDK5RAP2	0
chr1	154714000	chr22	49974000	merge.BND.392	KCNN3	.	0
chr1	202204000	chr19	29010000	merge.BND.393	LGR6	LINC01532	0
chr1	23246000	chr16	27942000	merge.BND.394	.	GSG1L	0
chr1	41546000	chr7	98812000	merge.BND.395	HIVEP3	.	0
chr1	883000	chr20	29352000	merge.BND.396	.	.	1
chr1	93931000	chr13	84345000	merge.BND.397	.	ENSG00000288016	1
chr20	57975000	chr22	20164000	merge.BND.398	.	.	1
chr21	8219000	chr6	16752000	merge.BND.399	ENSG00000278996	ATXN1	1
chr22	38110000	chr5	11817000	merge.BND.400	BAIAP2L2	CTNND2	0
chr4	62689000	chr5	146174000	merge.BND.401	.	LARS1	0
chr5	106901000	chr8	128750000	merge.BND.402	LINC01950	CCDC26	0
chr5	106904000	chr8	128750000	merge.BND.403	LINC01950	CCDC26	0
chr10	133688000	chr9	120838000	merge.BND.404	.	CUTALP	0
chr10	133787000	chr16	20000	merge.BND.405	.	ENSG00000260803	0
chr11	11927000	chr6	56894000	merge.BND.406	USP47	DST	1
chr11	1940000	chr14	100167000	merge.BND.407	.	.	1
chr11	38791000	chr8	51818000	merge.BND.408	.	PCMTD1	1
chr12	124092000	chr9	130955000	merge.BND.409	RFLNA	.	1
chr12	22558000	chr21	24133000	merge.BND.410	C2CD5-AS1	.	1
chr13	21726000	chr21	43338000	merge.BND.411	.	.	0
chr13	30843000	chr8	53594000	merge.BND.412	.	.	0
chr14	88684000	chr6	79681000	merge.BND.413	EML5	SH3BGRL2	1
chr14	89363000	chr6	167641000	merge.BND.414	FOXN3	.	1
chr15	44785000	chr6	32668000	merge.BND.415	.	HLA-DQB1	0
chr18	107000	chr4	190080000	merge.BND.416	.	.	0
chr1	168056000	chr19	23850000	merge.BND.417	DCAF6	ENSG00000267924	1
chr1	2325000	chr19	1670000	merge.BND.418	MORN1	.	1
chr1	41546000	chr8	100426000	merge.BND.419	HIVEP3	ENSG00000253824	1
chr1	86682000	chr14	39406000	merge.BND.420	CLCA4-AS1	FBXO33	1
chr21	43336000	chr8	141779000	merge.BND.421	.	.	0
chr21	43338000	chr6	157270000	merge.BND.422	.	.	0
chr22	23253000	chr4	89724000	merge.BND.423	BCR	SNCA	1
chr2	197157000	chr4	119923000	merge.BND.424	ANKRD44	.	1
chr2	238872000	chr9	89372000	merge.BND.425	TWIST2	SEMA4D	0
chr3	111555000	chr8	127522000	merge.BND.426	CD96	.	1
chr3	155987000	chr9	128690000	merge.BND.427	.	SET	1
chr4	11717000	chrX	14437000	merge.BND.428	ENSG00000249631	.	1
chr4	190120000	chrY	57206000	merge.BND.429	.	ENSG00000292369	1
chr4	19079000	chr9	3947000	merge.BND.430	.	GLIS3	1
chr10	35667000	chr22	20164000	merge.BND.431	.	.	1
chr10	70021000	chr16	21220000	merge.BND.432	.	.	0
chr11	102731000	chr18	11247000	merge.BND.433	.	.	0
chr11	5106000	chr12	70201000	merge.BND.434	.	PRANCR	1
chr11	64553000	chr17	81531000	merge.BND.435	.	FSCN2	0
chr11	71563000	chr7	136667000	merge.BND.436	.	.	0
chr12	88701000	chr14	95583000	merge.BND.437	.	.	0
chr15	51981000	chrX	34760000	merge.BND.438	MAPK6	.	0
chr15	95052000	chr6	133114000	merge.BND.439	ENSG00000277654	.	0
chr17	21668000	chr20	25930000	merge.BND.440	.	.	1
chr17	65488000	chr20	63102000	merge.BND.441	.	HAR1B	0
chr19	18443000	chr22	50341000	merge.BND.442	ELL	.	0
chr1	104844000	chr4	102423000	merge.BND.443	.	SLC39A8	1
chr1	162380000	chr21	8427000	merge.BND.444	C1orf226	ENSG00000280441	0
chr1	45498000	chr6	27828000	merge.BND.445	CCDC163	.	0
chr1	5534000	chrX	46341000	merge.BND.446	.	.	0
chr20	28557000	chr5	149656000	merge.BND.447	.	.	0
chr20	36314000	chr22	50338000	merge.BND.448	DLGAP4	.	0
chr22	22361000	chr7	113782000	merge.BND.449	.	.	0
chr22	23856000	chr5	79131000	merge.BND.450	.	DMGDH	1
chr22	24006000	chr3	106901000	merge.BND.451	.	LINC00882	0
chr2	104824000	chr22	20162000	merge.BND.452	PANTR1	.	0
chr2	203191000	chr9	129430000	merge.BND.453	NBEAL1	.	1
chr2	238870000	chr9	89370000	merge.BND.454	TWIST2	SEMA4D	0
chr2	5024000	chr5	11880000	merge.BND.455	.	CTNND2	0
chr3	138127000	chr7	1148000	merge.BND.456	A4GNT	.	0
chr3	38084000	chr5	11880000	merge.BND.457	DLEC1	CTNND2	0
chr4	155538000	chr5	35714000	merge.BND.458	.	SPEF2	0
chr9	129443000	chrX	139342000	merge.BND.459	ENSG00000230676	.	0
chr10	132775000	chr16	81705000	merge.BND.460	INPP5A	CMIP	1
chr10	133669000	chrY	11316000	merge.BND.461	.	DUX4L17	1
chr10	133690000	chr4	190067000	merge.BND.462	.	DBET	0
chr11	68889000	chr5	71528000	merge.BND.463	.	BDP1	1
chr12	11000	chr7	159336000	merge.BND.464	.	.	0
chr13	101340000	chr16	1889000	merge.BND.465	NALCN	.	0
chr13	30843000	chr8	21767000	merge.BND.466	.	GFRA2	1
chr13	34799000	chr9	86587000	merge.BND.467	.	.	0
chr13	35764000	chr8	21767000	merge.BND.468	.	GFRA2	1
chr13	43496000	chr15	76262000	merge.BND.469	ENOX1	ETFA	1
chr13	51161000	chr22	40747000	merge.BND.470	C13orf42	.	0
chr14	100168000	chr17	448000	merge.BND.471	.	.	1
chr14	20708000	chr2	119843000	merge.BND.472	.	PTPN4	0
chr16	28090000	chr20	38356000	merge.BND.473	.	LBP	0
chr16	34066000	chr20	28890000	merge.BND.474	.	.	1
chr18	107000	chr4	190090000	merge.BND.475	.	.	0
chr18	49811000	chr7	100740000	merge.BND.476	ENSG00000266997	ZAN	0
chr19	24330000	chr5	46435000	merge.BND.477	.	.	1
chr19	44546000	chr22	16801000	merge.BND.478	CEACAM22P	XKR3	1
chr19	48669000	chr8	141779000	merge.BND.479	SEC1P	.	1
chr19	50498000	chr22	38110000	merge.BND.480	ENSG00000289950	BAIAP2L2	0
chr19	55449000	chrX	68653000	merge.BND.481	.	STARD8	0
chr1	110120000	chr21	43337000	merge.BND.482	.	.	0
chr1	116437000	chr14	82676000	merge.BND.483	LINC01762	LINC02301	0
chr1	152486000	chr6	29816000	merge.BND.484	.	.	1
chr1	168055000	chr19	23850000	merge.BND.485	DCAF6	ENSG00000267924	0
chr1	223609000	chr7	50336000	merge.BND.486	CAPN8	IKZF1	1
chr1	223609000	chr8	132894000	merge.BND.487	CAPN8	TG	0
chr1	240563000	chr17	80498000	merge.BND.488	GREM2	.	0
chr1	9411000	chr5	168747000	merge.BND.489	.	SLIT3	0
chr20	28557000	chr5	6448000	merge.BND.490	.	.	0
chr20	63102000	chr9	133565000	merge.BND.491	HAR1B	ADAMTSL2	1
chr2	169686000	chr5	142075000	merge.BND.492	CFAP210	.	1
chr4	134645000	chr7	142305000	merge.BND.493	.	.	1
chr4	16110000	chr9	137356000	merge.BND.494	.	EXD3	0
chr6	39845000	chr7	154574000	merge.BND.495	DAAM2	DPP6	1
chr7	124811000	chr8	72879000	merge.BND.496	.	ENSG00000253784	0
chr7	150910000	chr9	132143000	merge.BND.497	.	.	0
chr11	121329000	chr7	150910000	merge.BND.498	.	.	0
chr11	2125000	chr7	148332000	merge.BND.499	.	CNTNAP2	1
chr11	33209000	chr3	155989000	merge.BND.500	.	.	0
chr11	38325000	chr13	86270000	merge.BND.501	.	.	1
chr11	64596000	chr20	38195000	merge.BND.502	SLC22A12	.	1
chr11	83017000	chr4	155957000	merge.BND.503	ENSG00000254698	.	1
chr12	108579000	chr22	43495000	merge.BND.504	.	MPPED1	0
chr12	20554000	chr8	51791000	merge.BND.505	PDE3A	PXDNL	1
chr12	49879000	chr21	37708000	merge.BND.506	FAIM2	KCNJ6	0
chr12	93484000	chr3	41559000	merge.BND.507	MRPL42	ULK4	0
chr12	94018000	chr6	133114000	merge.BND.508	.	.	0
chr13	27064000	chr2	7488000	merge.BND.509	.	.	0
chr13	92371000	chr7	111508000	merge.BND.510	GPC5	IMMP2L	0
chr14	57499000	chr5	87288000	merge.BND.511	.	RASA1	1
chr18	64000	chr20	64288000	merge.BND.512	TUBB8B	PCMTD2	0
chr19	29365000	chr3	113025000	merge.BND.513	VSTM2B-DT	NEPRO-AS1	0
chr19	41037000	chr22	23510000	merge.BND.514	.	.	1
chr19	6996000	chr2	60467000	merge.BND.515	ENSG00000290427	BCL11A	0
chr1	173624000	chr17	50041000	merge.BND.516	ANKRD45	.	1
chr1	222487000	chr5	126729000	merge.BND.517	ENSG00000276997	.	1
chr1	248754000	chr13	26973000	merge.BND.518	LYPD8	ENSG00000283579	0
chr1	4333000	chr13	26733000	merge.BND.519	.	.	0
chr20	62398000	chr9	130959000	merge.BND.520	CABLES2	.	1
chr20	63443000	chr3	9300000	merge.BND.521	KCNQ2	ENSG00000254485	0
chr21	43468000	chr9	134186000	merge.BND.522	LINC00313	.	0
chr22	29102000	chr4	89016000	merge.BND.523	KREMEN1	FAM13A	0
chr22	32533000	chr6	24684000	merge.BND.524	SYN3	ACOT13	0
chr22	50337000	chrX	153383000	merge.BND.525	.	.	0
chr2	133922000	chr5	140620000	merge.BND.526	.	.	1
chr2	62285000	chrX	46341000	merge.BND.527	.	.	0
chr2	69332000	chr21	8989000	merge.BND.528	GFPT1	.	0
chr3	2993000	chr7	19826000	merge.BND.529	CNTN4	.	0
chr3	84516000	chr4	179131000	merge.BND.530	.	.	1
chr4	63202000	chrX	122741000	merge.BND.531	.	.	1
chr5	32338000	chrM	15000	merge.BND.532	.	MT-CYB	1
chr5	34197000	chr6	57924000	merge.BND.533	GUSBP18	ENSG00000283352	1
chr6	170114000	chr7	155860000	merge.BND.534	.	.	1
chr7	159336000	chrX	156030000	merge.BND.535	.	.	1
chr10	123254000	chr11	92705000	merge.BND.536	.	FAT3	0
chr10	123256000	chr11	92706000	merge.BND.537	.	FAT3	0
chr10	133755000	chrY	11316000	merge.BND.538	.	DUX4L17	0
chr11	1172000	chr14	104444000	merge.BND.539	MUC5AC	.	1
chr11	11927000	chr12	95843000	merge.BND.540	USP47	SNRPF-DT	1
chr11	33209000	chr9	128690000	merge.BND.541	.	SET	1
chr11	69918000	chr13	100452000	merge.BND.542	.	PCCA	0
chr11	77194000	chr19	14596000	merge.BND.543	MYO7A	CLEC17A	1
chr12	124439000	chr19	49166000	merge.BND.544	NCOR2	TRPM4	0
chr12	127154000	chr14	92764000	merge.BND.545	ENSG00000286016	.	0
chr12	2573000	chr19	14764000	merge.BND.546	CACNA1C	ADGRE2	0
chr12	2683000	chr19	6718000	merge.BND.547	CACNA1C	C3	0
chr12	42088000	chr2	94733000	merge.BND.548	GXYLT1	.	1
chr13	113723000	chr2	241866000	merge.BND.549	GRK1	.	1
chr13	18212000	chr21	10324000	merge.BND.550	FAM230C	.	0
chr14	102678000	chr19	23845000	merge.BND.551	RCOR1	ENSG00000267924	1
chr14	21420000	chr3	106902000	merge.BND.552	CHD8	LINC00882	0
chr14	81320000	chr8	116681000	merge.BND.553	STON2	EIF3H	1
chr15	58871000	chr20	4059000	merge.BND.554	RNF111	.	1
chr16	28089000	chr21	44984000	merge.BND.555	.	.	1
chr17	80498000	chr22	27631000	merge.BND.556	.	.	0
chr17	81208000	chr22	50339000	merge.BND.557	CEP131	.	0
chr17	81531000	chr19	55266000	merge.BND.558	FSCN2	HSPBP1	0
chr17	81531000	chr4	6005000	merge.BND.559	FSCN2	C4orf50	1
chr18	49811000	chr3	128956000	merge.BND.560	ENSG00000266997	CFAP92	0
chr19	22232000	chr6	77725000	merge.BND.561	.	MEI4	0
chr19	2569000	chr8	40821000	merge.BND.562	GNG7	ZMAT4	0
chr19	443000	chr21	45340000	merge.BND.563	SHC2	LINC00316	0
chr19	727000	chrX	156020000	merge.BND.564	PALM	ENSG00000270726	1
chr1	187598000	chr18	15095000	merge.BND.565	LINC01036	ENSG00000263635	1
chr1	27108000	chr11	133739000	merge.BND.566	SLC9A1	.	0
chr1	2859000	chr2	7489000	merge.BND.567	.	.	0
chr1	2860000	chr4	18612000	merge.BND.568	.	ENSG00000286046	0
chr1	70928000	chr6	28713000	merge.BND.569	PTGER3	.	1
chr20	62160000	chr8	141416000	merge.BND.570	SS18L1	PTP4A3	0
chr22	43495000	chr7	155893000	merge.BND.571	MPPED1	.	1
chr2	97212000	chrY	56822000	merge.BND.572	ANKRD36	.	1
chr3	11000	chr4	190123000	merge.BND.573	.	.	1
chr3	125090000	chr7	107299000	merge.BND.574	SLC12A8	COG5	0
chr4	62688000	chr5	146175000	merge.BND.575	.	LARS1	1
chr4	9703000	chr7	20670000	merge.BND.576	.	ABCB5	1
chr5	137679000	chrX	11941000	merge.BND.577	KLHL3	FRMPD4	0
chr5	149656000	chr9	134183000	merge.BND.578	.	.	0
chr6	39846000	chr7	154576000	merge.BND.579	DAAM2	DPP6	1
chr7	158595000	chr9	401000	merge.BND.580	.	DOCK8	0
chr7	159336000	chrY	57217000	merge.BND.581	.	.	1
chr9	809000	chrX	68653000	merge.BND.582	.	STARD8	0
chr10	110418000	chr7	93348000	merge.BND.583	.	VPS50	1
chr10	1220000	chr12	131478000	merge.BND.584	ADARB2	ENSG00000256209	1
chr10	67190000	chr5	39788000	merge.BND.585	CTNNA3	.	1
chr10	99841000	chr17	33737000	merge.BND.586	ABCC2	ASIC2	1
chr11	81523000	chr16	7898000	merge.BND.587	.	ENSG00000260289	0
chr11	93140000	chr7	124811000	merge.BND.588	.	.	0
chr12	92531000	chr3	78074000	merge.BND.589	MTCH2P2	.	1
chr13	18213000	chr21	10360000	merge.BND.590	FAM230C	.	1
chr13	81302000	chr6	90290000	merge.BND.591	ENSG00000229309	BACH2	0
chr14	26679000	chr6	61363000	merge.BND.592	ENSG00000258081	.	1
chr15	20344000	chr16	33340000	merge.BND.593	.	.	0
chr16	21220000	chr3	179048000	merge.BND.594	.	ZMAT3	0
chr16	89011000	chr20	20337000	merge.BND.595	.	CFAP61	0
chr17	7265000	chr8	30288000	merge.BND.596	.	.	1
chr17	81531000	chr20	62382000	merge.BND.597	FSCN2	.	0
chr18	107000	chr4	190070000	merge.BND.598	.	.	0
chr18	25034000	chr9	133564000	merge.BND.599	.	ADAMTSL2	0
chr19	3333000	chr21	41856000	merge.BND.600	NFIC	PRDM15	0
chr19	58587000	chr8	145075000	merge.BND.601	ENSG00000286104	.	0
chr19	6717000	chr3	194326000	merge.BND.602	C3	.	0
chr19	727000	chrY	57207000	merge.BND.603	PALM	ENSG00000292369	0
chr1	14493000	chrX	68653000	merge.BND.604	KAZN	STARD8	0
chr1	154677000	chr3	151665000	merge.BND.605	ENSG00000287064	.	1
chr1	181246000	chr15	49051000	merge.BND.606	.	.	0
chr1	202205000	chr19	29010000	merge.BND.607	LGR6	LINC01532	0
chr1	37776000	chr19	41647000	merge.BND.608	.	.	0
chr1	5534000	chr14	77093000	merge.BND.609	.	.	1
chr20	25544000	chr4	41931000	merge.BND.610	NINL	ENSG00000249771	1
chr20	64287000	chr4	190117000	merge.BND.611	PCMTD2	.	0
chr21	16972000	chr9	35495000	merge.BND.612	.	RUSC2	0
chr21	8989000	chr4	49290000	merge.BND.613	.	.	1
chr22	22361000	chr8	72876000	merge.BND.614	.	ENSG00000253784	1
chr2	169686000	chr5	142077000	merge.BND.615	CFAP210	.	1
chr3	106076000	chr4	9703000	merge.BND.616	.	.	1
chr3	123872000	chr7	49686000	merge.BND.617	MYLK	.	1
chr3	12563000	chrX	145855000	merge.BND.618	MKRN2	.	0
chr3	12655000	chr9	107778000	merge.BND.619	RAF1	.	1
chr3	49404000	chr7	136107000	merge.BND.620	RHOA	ENSG00000232053	1
chr6	77590000	chr9	97256000	merge.BND.621	.	SUGT1P4-STRA6LP-CCDC180	0
chr7	159336000	chrY	57216000	merge.BND.622	.	.	0
chr7	44255000	chr8	142256000	merge.BND.623	CAMK2B	TSNARE1	0
chr8	145075000	chrY	57206000	merge.BND.624	.	ENSG00000292369	0
chr10	105242000	chr3	2993000	merge.BND.625	SORCS3	CNTN4	1
chr10	133787000	chr4	190123000	merge.BND.626	.	.	0
chr10	26894000	chr11	101695000	merge.BND.627	.	TRPC6	0
chr10	27356000	chr3	191840000	merge.BND.628	.	.	0
chr11	11927000	chr22	40747000	merge.BND.629	USP47	.	0
chr11	1916000	chr2	241517000	merge.BND.630	.	.	1
chr11	36310000	chr17	44984000	merge.BND.631	PRR5L	NMT1	0
chr12	57495000	chr3	32946000	merge.BND.632	MARS1	.	1
chr13	26473000	chr2	194050000	merge.BND.633	.	.	1
chr13	66481000	chrX	37085000	merge.BND.634	PCDH9	.	1
chr14	104890000	chr20	58520000	merge.BND.635	CEP170B	APCDD1L-DT	0
chr14	105565000	chr9	121895000	merge.BND.636	.	TTLL11	0
chr14	20508000	chr17	20038000	merge.BND.637	RNASE10	SPECC1	1
chr14	20708000	chr16	56739000	merge.BND.638	.	NUP93	1
chr14	90446000	chr19	9484000	merge.BND.639	.	ZNF560	1
chr16	10653000	chr6	44181000	merge.BND.640	TEKT5	CAPN11	0
chr16	33336000	chr6	257000	merge.BND.641	.	.	1
chr16	34063000	chr18	107000	merge.BND.642	.	.	0
chr18	113000	chrY	11334000	merge.BND.643	ROCK1P1	.	1
chr18	42190000	chr6	153428000	merge.BND.644	LINC00907	.	0
chr19	50493000	chr8	48193000	merge.BND.645	ENSG00000289950	.	0
chr19	54350000	chr20	62756000	merge.BND.646	.	NTSR1	0
chr19	55435000	chr20	22472000	merge.BND.647	SHISA7	.	0
chr19	55435000	chr8	21767000	merge.BND.648	SHISA7	GFRA2	1
chr19	58608000	chr3	11000	merge.BND.649	.	.	0
chr19	7108000	chr22	20252000	merge.BND.650	.	RTN4R	0
chr1	103938000	chr2	127692000	merge.BND.651	.	.	1
chr1	180873000	chr5	90155000	merge.BND.652	XPR1	LINC01339	1
chr1	202206000	chr19	29010000	merge.BND.653	LGR6	LINC01532	0
chr1	213541000	chr2	232550000	merge.BND.654	ENSG00000225233	TIGD1	0
chr1	230332000	chr2	224919000	merge.BND.655	PGBD5	DOCK10	0
chr1	236097000	chr12	7584000	merge.BND.656	.	.	0
chr1	27086000	chr22	50339000	merge.BND.657	.	.	0
chr1	41545000	chr21	10426000	merge.BND.658	HIVEP3	ENSG00000290523	0
chr1	5388000	chr13	30843000	merge.BND.659	.	.	0
chr20	29885000	chrX	113991000	merge.BND.660	.	XACT	1
chr20	62382000	chr21	43337000	merge.BND.661	.	.	0
chr20	63443000	chr8	142432000	merge.BND.662	KCNQ2	.	1
chr21	33321000	chr5	133626000	merge.BND.663	.	.	1
chr21	43338000	chr9	89672000	merge.BND.664	.	LINC03062	0
chr21	46134000	chr8	145079000	merge.BND.665	.	.	0
chr22	10743000	chr4	14012000	merge.BND.666	.	.	0
chr22	11211000	chr4	49712000	merge.BND.667	.	.	1
chr22	50341000	chrX	153384000	merge.BND.668	.	.	1
chr2	169468000	chr6	28713000	merge.BND.669	.	.	0
chr2	169686000	chr5	167861000	merge.BND.670	CFAP210	TENM2	0
chr2	208177000	chr4	81969000	merge.BND.671	C2orf80	RASGEF1B	0
chr2	238487000	chr20	30425000	merge.BND.672	.	.	1
chr2	241517000	chr6	3777000	merge.BND.673	.	.	0
chr2	47583000	chr22	23854000	merge.BND.674	MSH2	.	1
chr3	166391000	chr4	155957000	merge.BND.675	.	.	0
chr3	41560000	chr8	9443000	merge.BND.676	ULK4	.	1
chr3	72338000	chrX	68654000	merge.BND.677	.	STARD8	0
chr3	75669000	chrY	11309000	merge.BND.678	RPL23AP49	.	1
chr3	77779000	chrX	81069000	merge.BND.679	.	.	1
chr5	142000000	chr9	33455000	merge.BND.680	GNPDA1	.	0
chr5	180416000	chr9	86587000	merge.BND.681	.	.	0
chr5	34308000	chr7	6625000	merge.BND.682	.	.	0
chr5	5306000	chr8	142082000	merge.BND.683	ADAMTS16	.	0
chr8	141541000	chr9	134286000	merge.BND.684	.	.	0
chr10	133686000	chr18	106000	merge.BND.685	.	.	0
chr10	38530000	chr22	16401000	merge.BND.686	.	.	1
chr10	478000	chr17	78632000	merge.BND.687	DIP2C	SCAT1	0
chr10	92377000	chr3	46803000	merge.BND.688	.	ENSG00000284672	0
chr11	11246000	chr15	85898000	merge.BND.689	.	.	1
chr11	5106000	chr7	1145000	merge.BND.690	.	.	0
chr11	64553000	chr21	43338000	merge.BND.691	.	.	0
chr11	66395000	chr6	56896000	merge.BND.692	.	DST	0
chr11	8818000	chr8	116681000	merge.BND.693	DENND2B	EIF3H	1
chr12	197000	chr17	82148000	merge.BND.694	SLC6A12	CCDC57	0
chr12	58635000	chr22	23856000	merge.BND.695	LINC02388	.	1
chr12	58635000	chr7	1148000	merge.BND.696	LINC02388	.	0
chr13	101340000	chr17	39130000	merge.BND.697	NALCN	PLXDC1	0
chr13	18215000	chr22	18897000	merge.BND.698	FAM230C	.	1
chr13	38957000	chrX	124350000	merge.BND.699	.	SH2D1A	1
chr13	51161000	chr14	64897000	merge.BND.700	C13orf42	.	0
chr14	59479000	chr2	10955000	merge.BND.701	L3HYPDH	.	0
chr16	10500000	chr17	50086000	merge.BND.702	.	ITGA3	1
chr17	21668000	chr9	61729000	merge.BND.703	.	.	1
chr17	56793000	chr8	142257000	merge.BND.704	C17orf67	TSNARE1	0
chr17	76323000	chr5	43089000	merge.BND.705	PRPSAP1	ZNF131	1
chr18	25033000	chr9	133565000	merge.BND.706	.	ADAMTSL2	0
chr18	79542000	chr19	442000	merge.BND.707	.	SHC2	0
chr19	40110000	chr6	132707000	merge.BND.708	.	VNN1	0
chr19	50493000	chr8	56311000	merge.BND.709	ENSG00000289950	SDR16C5	0
chr1	103938000	chr6	16791000	merge.BND.710	.	.	1
chr1	144107000	chr2	87431000	merge.BND.711	.	.	1
chr1	168472000	chr4	157356000	merge.BND.712	ENSG00000228697	GRIA2	1
chr1	18050000	chr21	43338000	merge.BND.713	.	.	1
chr1	182305000	chr17	76323000	merge.BND.714	LINC01344	PRPSAP1	1
chr1	206004000	chr12	2683000	merge.BND.715	.	CACNA1C	0
chr1	218988000	chr5	54514000	merge.BND.716	LYPLAL1-DT	.	1
chr1	222489000	chr5	126729000	merge.BND.717	ENSG00000276997	.	1
chr1	226396000	chr7	72242000	merge.BND.718	PARP1	CALN1	0
chr1	226979000	chr20	24836000	merge.BND.719	ENSG00000288674	.	0
chr1	246643000	chr2	229564000	merge.BND.720	CNST	DNER	0
chr1	2860000	chr4	18611000	merge.BND.721	.	ENSG00000286046	1
chr1	33836000	chr20	30938000	merge.BND.722	CSMD2	.	0
chr1	35000	chr20	60000	merge.BND.723	FAM138A	.	0
chr1	37446000	chr9	133564000	merge.BND.724	ZC3H12A-DT	ADAMTSL2	0
chr1	45703000	chr2	35984000	merge.BND.725	IPP	.	1
chr1	84052000	chrX	77191000	merge.BND.726	ENSG00000285201	.	1
chr20	30515000	chr21	8989000	merge.BND.727	.	.	1
chr21	10360000	chr22	18206000	merge.BND.728	.	.	1
chr21	10426000	chr7	98812000	merge.BND.729	ENSG00000290523	.	0
chr21	10427000	chr6	3222000	merge.BND.730	ENSG00000290523	.	0
chr21	28676000	chr8	61213000	merge.BND.731	.	CLVS1	0
chr21	41673000	chr22	50341000	merge.BND.732	.	.	0
chr21	43336000	chr4	6511000	merge.BND.733	.	PPP2R2C	1
chr21	43337000	chr9	130959000	merge.BND.734	.	.	0
chr22	40744000	chr6	37768000	merge.BND.735	.	.	0
chr2	142822000	chr3	48214000	merge.BND.736	.	.	0
chr2	239659000	chr5	3276000	merge.BND.737	.	.	0
chr3	10366000	chr7	159167000	merge.BND.738	ATP2B2	.	0
chr3	138127000	chr7	1145000	merge.BND.739	A4GNT	.	0
chr3	185454000	chr6	69567000	merge.BND.740	MAP3K13	.	1
chr3	198173000	chr4	190123000	merge.BND.741	ENSG00000290937	.	1
chr4	190120000	chrX	156020000	merge.BND.742	.	ENSG00000270726	1
chr4	23103000	chrX	3525000	merge.BND.743	ENSG00000248837	.	0
chr4	35202000	chrX	81673000	merge.BND.744	.	.	0
chr4	5706000	chrY	946000	merge.BND.745	EVC2	.	1
chr4	58921000	chr6	31430000	merge.BND.746	ENSG00000251339	ENSG00000288587	1
chr4	91046000	chrX	103761000	merge.BND.747	CCSER1	ENSG00000288597	1
chr5	176964000	chr7	6625000	merge.BND.748	UIMC1	.	0
chr5	49601000	chrY	56852000	merge.BND.749	.	.	0
chr5	95213000	chrX	46819000	merge.BND.750	MCTP1	.	0
chr6	73020000	chr8	128727000	merge.BND.751	KCNQ5	CCDC26	1
chr7	158440000	chr8	142186000	merge.BND.752	PTPRN2	.	1
chr7	94194000	chrX	150521000	merge.BND.753	.	.	0
chr9	31621000	chrX	81674000	merge.BND.754	.	.	0
chr10	1220000	chr20	61823000	merge.BND.755	ADARB2	CDH4	0
chr10	123256000	chr19	6996000	merge.BND.756	.	ENSG00000290427	0
chr10	15400000	chr14	49761000	merge.BND.757	.	.	0
chr10	3042000	chr17	28223000	merge.BND.758	.	ENSG00000287721	0
chr10	68540000	chr6	32653000	merge.BND.759	.	.	0
chr11	122990000	chr21	43337000	merge.BND.760	.	.	0
chr11	126799000	chr4	7388000	merge.BND.761	KIRREL3	SORCS2	0
chr11	130090000	chr8	108124000	merge.BND.762	APLP2	.	0
chr11	16889000	chr20	30881000	merge.BND.763	PLEKHA7	.	0
chr11	36310000	chr6	167433000	merge.BND.764	PRR5L	.	0
chr11	77100000	chr12	14171000	merge.BND.765	CAPN5	.	1
chr11	93137000	chr4	146304000	merge.BND.766	.	SLC10A7	0
chr12	101484000	chr6	56894000	merge.BND.767	SPIC	DST	0
chr12	126832000	chr7	132561000	merge.BND.768	.	PLXNA4	0
chr12	57965000	chr8	139463000	merge.BND.769	.	ENSG00000254258	0
chr13	26473000	chr7	148366000	merge.BND.770	.	CNTNAP2	1
chr13	35761000	chr8	21767000	merge.BND.771	.	GFRA2	1
chr13	41401000	chrX	90457000	merge.BND.772	.	.	1
chr13	51161000	chr6	125388000	merge.BND.773	C13orf42	ENSG00000226409	0
chr13	82629000	chr7	14471000	merge.BND.774	.	DGKB	0
chr14	52201000	chr5	177772000	merge.BND.775	.	FAM153A	0
chr14	64897000	chr20	52092000	merge.BND.776	.	ZFP64	0
chr14	65792000	chr22	50338000	merge.BND.777	.	.	1
chr15	34376000	chr20	18517000	merge.BND.778	.	SEC23B	1
chr16	28089000	chr20	38356000	merge.BND.779	.	LBP	0
chr16	90118000	chr17	118000	merge.BND.780	FAM157C	ENSG00000280136	0
chr17	20092000	chr3	150822000	merge.BND.781	SPECC1	SIAH2-AS1	0
chr17	62794000	chr6	167641000	merge.BND.782	MARCHF10	.	1
chr17	82802000	chr19	40965000	merge.BND.783	TBCD	.	0
chr18	109000	chrY	11315000	merge.BND.784	.	DUX4L17	0
chr19	1670000	chr4	137828000	merge.BND.785	.	.	0
chr19	53189000	chr3	138127000	merge.BND.786	ZNF665	A4GNT	1
chr1	13328000	chr11	66395000	merge.BND.787	.	.	0
chr1	154714000	chr10	84602000	merge.BND.788	KCNN3	.	0
chr1	26974000	chr2	91496000	merge.BND.789	.	.	1
chr1	29554000	chr8	142256000	merge.BND.790	.	TSNARE1	0
chr1	45703000	chr2	57586000	merge.BND.791	IPP	.	1
chr20	13671000	chr4	73267000	merge.BND.792	.	ANKRD17-DT	0
chr20	63443000	chr6	170184000	merge.BND.793	KCNQ2	ENSG00000230960	1
chr21	33321000	chrX	117424000	merge.BND.794	.	.	1
chr21	42385000	chr4	7449000	merge.BND.795	TMPRSS3	SORCS2	0
chr21	43336000	chr6	157271000	merge.BND.796	.	.	0
chr21	43337000	chr8	142432000	merge.BND.797	.	.	1
chr22	36127000	chrY	11068000	merge.BND.798	.	.	0
chr2	132247000	chr20	26635000	merge.BND.799	ANKRD30BL	.	1
chr2	135117000	chr6	64295000	merge.BND.800	RAB3GAP1	EYS	1
chr2	208099000	chr3	20552000	merge.BND.801	.	SGO1-AS1	1
chr2	231897000	chr8	14487000	merge.BND.802	.	SGCZ	1
chr2	235803000	chr6	35170000	merge.BND.803	AGAP1	.	0
chr2	88733000	chr22	22361000	merge.BND.804	RPIA	.	1
chr3	11000	chrX	156020000	merge.BND.805	.	ENSG00000270726	0
chr3	48214000	chr5	142000000	merge.BND.806	.	GNPDA1	0
chr3	85527000	chr7	141921000	merge.BND.807	CADM2	MGAM	1
chr3	87571000	chrX	39290000	merge.BND.808	.	ENSG00000224610	0
chr3	89460000	chr7	62334000	merge.BND.809	EPHA3	.	1
chr4	190083000	chrY	11310000	merge.BND.810	.	.	0
chr4	58879000	chr6	31427000	merge.BND.811	ENSG00000251339	ENSG00000288587	1
chr4	9703000	chr7	20668000	merge.BND.812	.	ABCB5	0
chr5	50000	chr8	145075000	merge.BND.813	.	.	0
chr6	157548000	chrY	9592000	merge.BND.814	ZDHHC14	.	1
chr6	32538000	chr7	65261000	merge.BND.815	.	.	0
chr10	126122000	chr4	179131000	merge.BND.816	ADAM12	.	0
chr10	26894000	chr22	18939000	merge.BND.817	.	ENSG00000284294	0
chr11	101705000	chr19	22232000	merge.BND.818	TRPC6	.	0
chr11	128931000	chr9	137395000	merge.BND.819	.	EXD3	0
chr11	18643000	chr15	34376000	merge.BND.820	.	.	1
chr11	70803000	chr17	82148000	merge.BND.821	SHANK2	CCDC57	0
chr11	9871000	chr17	50041000	merge.BND.822	SBF2	.	0
chr13	18213000	chr21	10274000	merge.BND.823	FAM230C	.	1
chr14	101607000	chr15	29559000	merge.BND.824	DIO3OS	ENTREP2	0
chr14	49761000	chr9	90993000	merge.BND.825	.	.	0
chr14	89361000	chr15	29951000	merge.BND.826	FOXN3	TJP1	0
chr15	20340000	chr16	33491000	merge.BND.827	.	.	0
chr15	48034000	chr20	4447000	merge.BND.828	ENSG00000259754	.	0
chr15	60350000	chr17	72237000	merge.BND.829	ANXA2	SOX9-AS1	0
chr16	1114000	chr20	62875000	merge.BND.830	.	.	0
chr16	33956000	chr7	124811000	merge.BND.831	.	.	1
chr16	34073000	chr7	65489000	merge.BND.832	.	.	1
chr16	67809000	chr8	63105000	merge.BND.833	TSNAXIP1	.	1
chr16	7230000	chr21	42385000	merge.BND.834	RBFOX1	TMPRSS3	0
chr17	80498000	chr22	27632000	merge.BND.835	.	.	1
chr17	81249000	chr19	15581000	merge.BND.836	SLC38A10	CYP4F23P	0
chr17	81532000	chr22	27726000	merge.BND.837	FSCN2	.	0
chr19	11311000	chr8	128827000	merge.BND.838	TSPAN16	CCDC26	0
chr19	18443000	chr2	238870000	merge.BND.839	ELL	TWIST2	0
chr19	21688000	chr8	14487000	merge.BND.840	.	SGCZ	1
chr19	24330000	chr5	46690000	merge.BND.841	.	.	1
chr19	55435000	chr21	41673000	merge.BND.842	SHISA7	.	0
chr19	6430000	chr7	66099000	merge.BND.843	SLC25A41	ENSG00000249319	0
chr1	110121000	chr22	20164000	merge.BND.844	.	.	0
chr1	116437000	chr14	82675000	merge.BND.845	LINC01762	LINC02301	0
chr1	168217000	chr3	53142000	merge.BND.846	.	.	1
chr1	19061000	chr20	63444000	merge.BND.847	.	KCNQ2	0
chr1	223081000	chr19	55434000	merge.BND.848	.	SHISA7	0
chr1	246643000	chr2	229565000	merge.BND.849	CNST	DNER	0
chr1	51962000	chr12	95843000	merge.BND.850	RAB3B	SNRPF-DT	1
chr1	55240000	chr4	92907000	merge.BND.851	MIR4422HG	GRID2	0
chr1	58630000	chr2	180274000	merge.BND.852	.	.	0
chr1	634000	chr8	62103000	merge.BND.853	ENSG00000230021	.	1
chr1	75377000	chr12	55334000	merge.BND.854	SLC44A5	.	0
chr20	25113000	chr9	9008000	merge.BND.855	.	PTPRD	1
chr21	7262000	chrY	56837000	merge.BND.856	.	.	0
chr22	10743000	chr6	120692000	merge.BND.857	.	ENSG00000286540	0
chr22	43650000	chrX	3525000	merge.BND.858	EFCAB6	.	0
chr22	50340000	chr3	10366000	merge.BND.859	.	ATP2B2	0
chr2	231870000	chr7	479000	merge.BND.860	.	.	1
chr2	241897000	chr7	76997000	merge.BND.861	LINC01237	DTX2P1	0
chr2	33667000	chrM	15000	merge.BND.862	.	MT-CYB	0
chr2	72018000	chr8	139463000	merge.BND.863	.	ENSG00000254258	0
chr2	94560000	chr21	12998000	merge.BND.864	.	.	1
chr3	12655000	chr9	107775000	merge.BND.865	RAF1	.	1
chr3	30266000	chr6	13128000	merge.BND.866	.	PHACTR1	0
chr4	61940000	chr7	108189000	merge.BND.867	ADGRL3	NRCAM	1
chr4	70413000	chr7	117032000	merge.BND.868	.	ENSG00000288635	0
chr4	91046000	chr7	141578000	merge.BND.869	CCSER1	AGK	1
chr5	3392000	chr7	1759000	merge.BND.870	LINC01019	.	0
chr6	142129000	chr7	25048000	merge.BND.871	NMBR	.	1
chr6	36946000	chr8	116678000	merge.BND.872	.	EIF3H	0
chr6	72090000	chrX	141427000	merge.BND.873	RIMS1	SPANXA2-OT1	0
chr7	3954000	chr9	135991000	merge.BND.874	SDK1	.	0
chr8	143243000	chr9	101550000	merge.BND.875	.	RNF20	0
chr10	1220000	chr16	89046000	merge.BND.876	ADARB2	.	0
chr10	133337000	chr14	65792000	merge.BND.877	ZNF511-PRAP1	.	0
chr10	38920000	chr17	26936000	merge.BND.878	.	.	0
chr10	42163000	chr7	62409000	merge.BND.879	.	.	0
chr10	43423000	chr7	1145000	merge.BND.880	.	.	0
chr10	96416000	chr15	85897000	merge.BND.881	TLL2	.	0
chr11	1599000	chr4	74343000	merge.BND.882	KRTAP5-AS1	.	1
chr11	36310000	chr14	99928000	merge.BND.883	PRR5L	EML1	0
chr11	66395000	chr14	64897000	merge.BND.884	.	.	0
chr11	69917000	chr7	75255000	merge.BND.885	.	.	0
chr11	8818000	chr4	108411000	merge.BND.886	DENND2B	.	0
chr12	109636000	chr6	170184000	merge.BND.887	.	ENSG00000230960	0
chr12	122290000	chr17	83039000	merge.BND.888	CLIP1	B3GNTL1	0
chr12	12415000	chr4	9703000	merge.BND.889	BORCS5	.	0
chr12	127569000	chr9	133564000	merge.BND.890	ENSG00000287622	ADAMTSL2	0
chr12	52409000	chr2	182386000	merge.BND.891	ENSG00000257500	PDE1A	0
chr12	70201000	chr5	79131000	merge.BND.892	PRANCR	DMGDH	1
chr12	76242000	chr7	44044000	merge.BND.893	.	ENSG00000288746	0
chr13	30842000	chr6	39845000	merge.BND.894	.	DAAM2	0
chr13	81794000	chr5	142075000	merge.BND.895	.	.	1
chr13	86270000	chr5	75021000	merge.BND.896	.	ENSG00000249856	0
chr14	21809000	chr2	115938000	merge.BND.897	.	ENSG00000287451	1
chr14	63802000	chr2	24847000	merge.BND.898	SYNE2	ADCY3	0
chr14	74462000	chr4	111289000	merge.BND.899	.	ENSG00000288692	0
chr15	42216000	chr16	27941000	merge.BND.900	TMEM87A	GSG1L	0
chr16	10652000	chr2	3297000	merge.BND.901	TEKT5	EIPR1	0
chr16	16841000	chr6	147842000	merge.BND.902	.	ENSG00000227681	1
chr16	33959000	chr4	53502000	merge.BND.903	.	LNX1	0
chr16	86604000	chr19	50493000	merge.BND.904	.	ENSG00000289950	0
chr16	89069000	chr2	38712000	merge.BND.905	.	GALM	0
chr17	50273000	chr5	104707000	merge.BND.906	TMEM92	ENSG00000251574	0
chr17	50273000	chr5	105173000	merge.BND.907	TMEM92	ENSG00000251574	0
chr17	5056000	chr6	31853000	merge.BND.908	.	.	1
chr17	62792000	chr6	167591000	merge.BND.909	MARCHF10	.	0
chr17	70858000	chr4	70413000	merge.BND.910	.	.	0
chr17	80315000	chr9	134714000	merge.BND.911	RNF213	COL5A1	0
chr17	81531000	chr22	20251000	merge.BND.912	FSCN2	RTN4R	0
chr17	82802000	chr3	106074000	merge.BND.913	TBCD	.	0
chr19	21720000	chr2	174087000	merge.BND.914	VN1R84P	OLA1	0
chr19	54134000	chr5	179365000	merge.BND.915	.	.	0
chr19	55434000	chr20	22472000	merge.BND.916	SHISA7	.	0
chr19	7600000	chr5	180135000	merge.BND.917	CAMSAP3	RASGEF1C	1
chr1	111354000	chr10	100279000	merge.BND.918	CHIAP3	BLOC1S2	0
chr1	156559000	chr16	74811000	merge.BND.919	IQGAP3	.	0
chr1	162380000	chr21	8244000	merge.BND.920	C1orf226	.	0
chr1	223559000	chr7	50334000	merge.BND.921	CAPN8	IKZF1	1
chr1	23246000	chr22	44778000	merge.BND.922	.	ARHGAP8	0
chr1	248755000	chr13	97339000	merge.BND.923	LYPD8	MBNL2	0
chr1	29552000	chr21	43336000	merge.BND.924	.	.	0
chr1	3261000	chr20	63444000	merge.BND.925	PRDM16	KCNQ2	1
chr1	36794000	chr7	1578000	merge.BND.926	.	PSMG3-AS1	0
chr1	38946000	chrX	53511000	merge.BND.927	RRAGC-DT	.	1
chr1	45498000	chr3	51250000	merge.BND.928	CCDC163	DOCK3	0
chr1	51853000	chrX	57609000	merge.BND.929	NRDC	.	0
chr1	51962000	chr17	27213000	merge.BND.930	RAB3B	.	0
chr1	6743000	chr2	169466000	merge.BND.931	.	.	0
chr1	73130000	chr10	6824000	merge.BND.932	.	ENSG00000285845	0
chr1	75280000	chr2	162937000	merge.BND.933	SLC44A5	.	0
chr1	883000	chr20	29789000	merge.BND.934	.	.	1
chr20	28557000	chr9	41229000	merge.BND.935	.	.	0
chr20	30812000	chr3	75673000	merge.BND.936	.	LINC00960	0
chr20	38356000	chr9	89372000	merge.BND.937	LBP	SEMA4D	0
chr20	46789000	chrX	1267000	merge.BND.938	.	.	0
chr20	57975000	chr22	20163000	merge.BND.939	.	.	0
chr20	64287000	chr5	50000	merge.BND.940	PCMTD2	.	0
chr20	64287000	chr8	145075000	merge.BND.941	PCMTD2	.	1
chr21	10326000	chr22	18890000	merge.BND.942	.	FAM230F	1
chr21	27697000	chr4	138552000	merge.BND.943	.	LINC00499	1
chr22	11215000	chr3	93471000	merge.BND.944	.	.	1
chr22	12190000	chr4	49317000	merge.BND.945	.	.	0
chr22	24006000	chr4	155463000	merge.BND.946	.	MTND1P22	1
chr22	50339000	chr3	10366000	merge.BND.947	.	ATP2B2	0
chr2	154938000	chr3	40204000	merge.BND.948	.	MYRIP	0
chr2	213306000	chr7	28341000	merge.BND.949	SPAG16	CREB5	0
chr2	238870000	chr8	125423000	merge.BND.950	TWIST2	.	0
chr2	46879000	chr8	130898000	merge.BND.951	.	ADCY8	0
chr2	5023000	chr3	38085000	merge.BND.952	.	DLEC1	0
chr3	48210000	chr8	127613000	merge.BND.953	.	ENSG00000286266	0
chr3	80541000	chr9	12557000	merge.BND.954	.	.	0
chr4	137828000	chr5	167428000	merge.BND.955	.	TENM2	0
chr4	1514000	chr5	3447000	merge.BND.956	.	LINC01019	0
chr4	16949000	chr8	25069000	merge.BND.957	.	.	1
chr4	190077000	chrY	11334000	merge.BND.958	.	.	0
chr4	91046000	chr7	141584000	merge.BND.959	CCSER1	AGK	1
chr5	11817000	chr7	157776000	merge.BND.960	CTNND2	PTPRN2	0
chr5	52912000	chr8	133214000	merge.BND.961	ITGA1	CCN4	0
chr6	13191000	chr7	49686000	merge.BND.962	PHACTR1	.	0
chr6	148738000	chr8	104549000	merge.BND.963	.	LRP12	1
chr7	132562000	chr9	15127000	merge.BND.964	PLXNA4	ENSG00000291185	0
chr7	157777000	chr9	95572000	merge.BND.965	PTPRN2	.	0
chr8	48174000	chrX	68653000	merge.BND.966	.	STARD8	1
chr8	9771000	chrY	11068000	merge.BND.967	TNKS	.	1
chr10	103251000	chr14	89361000	merge.BND.968	NT5C2	FOXN3	1
chr10	133684000	chr22	12692000	merge.BND.969	DUX4L20	.	1
chr10	42321000	chrY	56826000	merge.BND.970	ENSG00000291065	.	1
chr10	45009000	chr20	28828000	merge.BND.971	CEP164P1	.	1
chr10	45025000	chr11	71563000	merge.BND.972	ENSG00000277757	.	1
chr10	56576000	chr8	106794000	merge.BND.973	.	.	1
chr10	66404000	chr2	128082000	merge.BND.974	CTNNA3	.	0
chr10	76617000	chr13	18213000	merge.BND.975	.	FAM230C	0
chr10	81212000	chrX	40766000	merge.BND.976	.	.	0
chr10	81212000	chrX	46773000	merge.BND.977	.	.	0
chr10	86251000	chr11	47893000	merge.BND.978	GRID1	.	1
chr10	95198000	chr22	23510000	merge.BND.979	ACSM6	.	0
chr11	126276000	chr2	3297000	merge.BND.980	FOXRED1	EIPR1	0
chr11	133028000	chr22	50338000	merge.BND.981	OPCML	.	0
chr11	1599000	chr5	600000	merge.BND.982	KRTAP5-AS1	.	0
chr11	186000	chr17	132000	merge.BND.983	ENSG00000255229	.	0
chr11	5106000	chr22	23854000	merge.BND.984	.	.	0
chr11	64706000	chr6	100609000	merge.BND.985	NRXN2	ASCC3	0
chr11	69917000	chr13	100452000	merge.BND.986	.	PCCA	0
chr12	107997000	chr9	129446000	merge.BND.987	.	ENSG00000230676	0
chr12	12653000	chr2	160080000	merge.BND.988	.	.	0
chr12	126832000	chr7	132562000	merge.BND.989	.	PLXNA4	0
chr12	132743000	chr16	89070000	merge.BND.990	ANKLE2	.	0
chr12	43524000	chr4	22978000	merge.BND.991	ADAMTS20	.	0
chr12	70945000	chr3	153766000	merge.BND.992	.	LINC02006	0
chr12	72846000	chr15	94345000	merge.BND.993	.	MCTP2	1
chr13	113425000	chr5	2161000	merge.BND.994	ADPRHL1	.	0
chr13	18212000	chr22	18890000	merge.BND.995	FAM230C	FAM230F	0
chr13	21243000	chr22	11340000	merge.BND.996	.	.	1
chr13	35763000	chr8	21767000	merge.BND.997	.	GFRA2	1
chr13	48282000	chr7	111969000	merge.BND.998	.	DOCK4	0
chr13	52270000	chr18	15095000	merge.BND.999	TPTE2P2	ENSG00000263635	1
chr14	105563000	chr9	121896000	merge.BND.1000	.	TTLL11	1
chr14	16097000	chr22	11216000	merge.BND.1001	.	.	0
chr14	39406000	chr16	16841000	merge.BND.1002	FBXO33	.	1
chr14	76188000	chr17	12352000	merge.BND.1003	GPATCH2L	.	0
chr14	82676000	chr6	95071000	merge.BND.1004	LINC02301	.	1
chr14	95583000	chr2	22055000	merge.BND.1005	.	ENSG00000228999	0
chr14	95583000	chr5	95927000	merge.BND.1006	.	ELL2	0
chr15	101981000	chr3	11000	merge.BND.1007	.	.	1
chr15	91749000	chr4	40294000	merge.BND.1008	.	.	0
chr15	95051000	chr2	47700000	merge.BND.1009	ENSG00000277654	MSH6	1
chr16	27941000	chr4	184754000	merge.BND.1010	GSG1L	.	0
chr16	34063000	chrY	10911000	merge.BND.1011	.	.	0
chr16	71384000	chrX	68654000	merge.BND.1012	LINC02136	STARD8	0
chr16	88980000	chr20	58520000	merge.BND.1013	.	APCDD1L-DT	0
chr17	16127000	chr4	46118000	merge.BND.1014	NCOR1	GABRG1	0
chr17	34978000	chr4	89017000	merge.BND.1015	CCT6B	FAM13A	0
chr17	41634000	chr7	157658000	merge.BND.1016	KRT42P	PTPRN2	0
chr17	52599000	chrX	49147000	merge.BND.1017	.	.	1
chr17	65489000	chrX	25816000	merge.BND.1018	.	.	0
chr17	81533000	chr2	38712000	merge.BND.1019	FSCN2	GALM	1
chr18	109000	chrY	11334000	merge.BND.1020	.	.	0
chr18	112000	chrY	11316000	merge.BND.1021	ROCK1P1	DUX4L17	0
chr18	49811000	chr2	32871000	merge.BND.1022	ENSG00000266997	LINC00486	0
chr18	80258000	chr3	10000	merge.BND.1023	.	.	1
chr19	24012000	chr6	55143000	merge.BND.1024	.	HCRTR2	0
chr19	41036000	chr9	129446000	merge.BND.1025	.	ENSG00000230676	0
chr19	41037000	chr9	129425000	merge.BND.1026	.	.	0
chr19	444000	chr21	45341000	merge.BND.1027	SHC2	LINC00316	0
chr19	50497000	chr22	38110000	merge.BND.1028	ENSG00000289950	BAIAP2L2	0
chr19	55435000	chr9	77453000	merge.BND.1029	SHISA7	GNA14	0
chr19	6070000	chr20	48450000	merge.BND.1030	RFX2	.	0
chr19	6070000	chr2	117078000	merge.BND.1031	RFX2	.	0
chr1	106776000	chr18	27184000	merge.BND.1032	.	CHST9	1
chr1	110121000	chr22	20163000	merge.BND.1033	.	.	0
chr1	143214000	chr18	27331000	merge.BND.1034	.	.	1
chr1	206925000	chr3	194328000	merge.BND.1035	.	.	0
chr1	213541000	chr2	232548000	merge.BND.1036	ENSG00000225233	TIGD1	1
chr1	230332000	chr12	131393000	merge.BND.1037	PGBD5	.	0
chr1	247363000	chr19	48762000	merge.BND.1038	ENSG00000289728	.	0
chr1	247363000	chr22	34396000	merge.BND.1039	ENSG00000289728	.	0
chr1	248753000	chr13	97339000	merge.BND.1040	LYPD8	MBNL2	0
chr1	29554000	chr21	43337000	merge.BND.1041	.	.	0
chr1	31432000	chr10	133065000	merge.BND.1042	SERINC2	.	0
chr1	48382000	chr5	79131000	merge.BND.1043	SPATA6	DMGDH	1
chr1	6013000	chr17	80313000	merge.BND.1044	KCNAB2	RNF213	0
chr1	73129000	chr10	6834000	merge.BND.1045	.	ENSG00000287277	0
chr1	77871000	chr6	36946000	merge.BND.1046	MIGA1	.	0
chr20	30515000	chr21	8261000	merge.BND.1047	.	.	0
chr20	38464000	chr4	35111000	merge.BND.1048	.	.	1
chr20	46789000	chrY	1267000	merge.BND.1049	.	.	0
chr20	56284000	chr3	185454000	merge.BND.1050	.	MAP3K13	1
chr20	56284000	chrX	16378000	merge.BND.1051	.	.	1
chr21	10324000	chr22	18418000	merge.BND.1052	.	.	0
chr21	10360000	chr22	18733000	merge.BND.1053	.	.	0
chr21	10360000	chrX	58046000	merge.BND.1054	.	.	1
chr21	10406000	chr22	11060000	merge.BND.1055	.	.	0
chr21	10427000	chr4	153130000	merge.BND.1056	ENSG00000290523	.	0
chr21	41673000	chr22	50340000	merge.BND.1057	.	.	0
chr21	43336000	chr22	20164000	merge.BND.1058	.	.	1
chr21	44420000	chr4	23106000	merge.BND.1059	TRPM2	ENSG00000248837	0
chr21	7262000	chrY	10853000	merge.BND.1060	.	.	0
chr21	8989000	chrX	123914000	merge.BND.1061	.	.	0
chr22	20162000	chr9	130959000	merge.BND.1062	.	.	1
chr22	20163000	chr5	35709000	merge.BND.1063	.	SPEF2	0
chr22	50337000	chr6	167555000	merge.BND.1064	.	.	0
chr2	10400000	chr21	43336000	merge.BND.1065	HPCAL1	.	0
chr2	111251000	chr21	43338000	merge.BND.1066	MIR4435-2HG	.	0
chr2	12528000	chr5	162531000	merge.BND.1067	MIR3681HG	ENSG00000254186	1
chr2	231006000	chr21	43336000	merge.BND.1068	SPATA3	.	0
chr2	238486000	chr20	30425000	merge.BND.1069	.	.	0
chr2	31823000	chrY	5574000	merge.BND.1070	KRT18P52	PCDH11Y	0
chr2	55385000	chr7	155160000	merge.BND.1071	CCDC88A	.	0
chr3	106076000	chr6	36946000	merge.BND.1072	.	.	0
chr3	11000	chr4	190120000	merge.BND.1073	.	.	1
chr3	185456000	chr6	69567000	merge.BND.1074	MAP3K13	.	1
chr3	3790000	chr4	70413000	merge.BND.1075	SUMF1	.	0
chr4	173485000	chrX	114281000	merge.BND.1076	.	.	1
chr4	62689000	chrX	139503000	merge.BND.1077	.	.	0
chr5	116113000	chr7	111592000	merge.BND.1078	COMMD10	.	1
chr5	149655000	chr9	132143000	merge.BND.1079	.	.	0
chr5	79779000	chr9	115322000	merge.BND.1080	CMYA5	DELEC1	0
chr6	169373000	chr7	157657000	merge.BND.1081	LINC02519	PTPRN2	0
chr7	121741000	chr8	112130000	merge.BND.1082	.	.	1
chr7	96575000	chr9	70240000	merge.BND.1083	SEM1	SMC5-DT	1
chr8	129496000	chrX	131136000	merge.BND.1084	CCDC26	.	1
chr9	133565000	chrX	25816000	merge.BND.1085	ADAMTSL2	.	0
chr9	37596000	chrY	15897000	merge.BND.1086	ENSG00000255872	.	0
chr9	69791000	chrX	23928000	merge.BND.1087	.	CXorf58	1
chrX	142392000	chrY	10624000	merge.BND.1088	ENSG00000288098	.	0
chr10	114084000	chr22	18732000	merge.BND.1089	.	.	0
chr10	118644000	chr22	23253000	merge.BND.1090	TOMM22P5	BCR	1
chr10	133680000	chr18	107000	merge.BND.1091	.	.	1
chr10	133754000	chrY	11318000	merge.BND.1092	DUX4L13	.	0
chr10	38918000	chr17	26941000	merge.BND.1093	.	.	0
chr10	80636000	chr19	76000	merge.BND.1094	SH2D4B	.	0
chr11	103026000	chr6	24054000	merge.BND.1095	.	.	0
chr11	114843000	chrX	19143000	merge.BND.1096	.	.	1
chr11	122990000	chr21	43336000	merge.BND.1097	.	.	0
chr11	126276000	chr4	3714000	merge.BND.1098	FOXRED1	.	0
chr11	30929000	chr14	40226000	merge.BND.1099	DCDC1	ENSG00000258526	0
chr11	36310000	chr6	167434000	merge.BND.1100	PRR5L	.	0
chr11	70788000	chr7	141337000	merge.BND.1101	SHANK2	TMEM178B	0
chr11	8980000	chr19	23828000	merge.BND.1102	NRIP3	ENSG00000267924	0
chr11	93137000	chr4	53502000	merge.BND.1103	.	LNX1	1
chr11	95442000	chr21	18145000	merge.BND.1104	.	CHODL	1
chr12	107914000	chr15	34018000	merge.BND.1105	.	AVEN	0
chr12	121751000	chr2	241897000	merge.BND.1106	TMEM120B	LINC01237	0
chr12	123453000	chr2	169469000	merge.BND.1107	.	.	1
chr12	14171000	chr18	49579000	merge.BND.1108	.	LIPG	0
chr12	6894000	chr2	202793000	merge.BND.1109	LRRC23	ICA1L	0
chr13	112973000	chr17	82148000	merge.BND.1110	MCF2L	CCDC57	0
chr13	30844000	chr6	39846000	merge.BND.1111	.	DAAM2	0
chr13	31610000	chr3	151665000	merge.BND.1112	.	.	1
chr13	38956000	chrX	124351000	merge.BND.1113	.	SH2D1A	0
chr13	92294000	chrX	93123000	merge.BND.1114	GPC5	.	1
chr14	105693000	chr22	38110000	merge.BND.1115	.	BAIAP2L2	0
chr14	20708000	chr5	109343000	merge.BND.1116	.	PJA2	0
chr14	44417000	chr6	78136000	merge.BND.1117	.	.	0
chr14	49761000	chr3	4160000	merge.BND.1118	.	SUMF1	0
chr14	59479000	chr8	130614000	merge.BND.1119	L3HYPDH	ENSG00000253656	0
chr14	59749000	chr6	166288000	merge.BND.1120	RTN1	.	1
chr16	22059000	chr6	32488000	merge.BND.1121	MOSMO	.	0
chr16	34062000	chr21	7262000	merge.BND.1122	.	.	0
chr16	81770000	chr5	180923000	merge.BND.1123	ENSG00000289733	BTNL8	0
chr16	83637000	chr2	22968000	merge.BND.1124	CDH13	.	0
chr16	83952000	chr4	26210000	merge.BND.1125	OSGIN1	RBPJ	0
chr17	117000	chr9	138231000	merge.BND.1126	ENSG00000280136	ENSG00000290585	0
chr17	77485000	chr6	35170000	merge.BND.1127	SEPTIN9	.	0
chr17	81531000	chr21	38060000	merge.BND.1128	FSCN2	KCNJ6	0
chr17	81533000	chr7	158049000	merge.BND.1129	FSCN2	PTPRN2	1
chr18	113000	chr22	12692000	merge.BND.1130	ROCK1P1	.	0
chr18	49811000	chr5	176963000	merge.BND.1131	ENSG00000266997	UIMC1	0
chr18	50410000	chr5	77270000	merge.BND.1132	.	PDE8B	1
chr18	78239000	chrX	68654000	merge.BND.1133	.	STARD8	0
chr19	33982000	chrX	68977000	merge.BND.1134	.	.	0
chr19	443000	chr21	45341000	merge.BND.1135	SHC2	LINC00316	0
chr19	44453000	chr21	8989000	merge.BND.1136	.	.	1
chr19	44546000	chr7	119869000	merge.BND.1137	CEACAM22P	LINC02476	0
chr19	48670000	chr6	160536000	merge.BND.1138	SEC1P	LPA	0
chr1	111260000	chr12	51454000	merge.BND.1139	.	SLC4A8	0
chr1	111354000	chr2	191741000	merge.BND.1140	CHIAP3	NABP1	0
chr1	11374000	chr19	55435000	merge.BND.1141	.	SHISA7	0
chr1	161029000	chr11	47893000	merge.BND.1142	ENSG00000270149	.	1
chr1	180867000	chr5	90155000	merge.BND.1143	XPR1	LINC01339	1
chr1	202625000	chr15	30172000	merge.BND.1144	SYT2	ENSG00000259906	0
chr1	218988000	chr2	13362000	merge.BND.1145	LYPLAL1-DT	.	0
chr1	223081000	chr22	50340000	merge.BND.1146	.	.	0
chr1	223479000	chr21	41474000	merge.BND.1147	.	TMPRSS2	0
chr1	230332000	chr19	55449000	merge.BND.1148	PGBD5	.	0
chr1	247363000	chr10	123573000	merge.BND.1149	ENSG00000289728	.	0
chr1	25530000	chr7	154574000	merge.BND.1150	.	DPP6	0
chr1	2860000	chr2	7488000	merge.BND.1151	.	.	0
chr1	2860000	chr7	89925000	merge.BND.1152	.	STEAP2-AS1	0
chr1	30732000	chr4	39813000	merge.BND.1153	ENSG00000287510	.	0
chr1	6012000	chr14	104807000	merge.BND.1154	KCNAB2	.	0
chr1	85755000	chr13	106784000	merge.BND.1155	COL24A1	.	1
chr1	877000	chr20	29369000	merge.BND.1156	ENSG00000283040	.	1
chr20	20321000	chrX	62909000	merge.BND.1157	CFAP61	.	0
chr20	56284000	chr3	185456000	merge.BND.1158	.	MAP3K13	1
chr21	33324000	chr8	129498000	merge.BND.1159	.	CCDC26	1
chr21	43338000	chr22	20162000	merge.BND.1160	.	.	1
chr21	43338000	chr8	142432000	merge.BND.1161	.	.	1
chr22	49974000	chr3	194328000	merge.BND.1162	.	.	0
chr2	127790000	chr9	88627000	merge.BND.1163	WDR33	.	0
chr2	234260000	chrX	101494000	merge.BND.1164	.	ARMCX4	0
chr2	238486000	chr20	28557000	merge.BND.1165	.	.	0
chr2	36829000	chr7	107299000	merge.BND.1166	.	COG5	0
chr2	62286000	chr4	145810000	merge.BND.1167	.	ZNF827	0
chr3	159681000	chrY	14422000	merge.BND.1168	IQCJ-SCHIP1	.	0
chr3	195751000	chr5	1656000	merge.BND.1169	MUC4	.	0
chr3	80541000	chr7	96847000	merge.BND.1170	.	.	1
chr4	190117000	chrX	156030000	merge.BND.1171	.	.	0
chr4	46118000	chr7	142305000	merge.BND.1172	GABRG1	.	0
chr4	70093000	chr6	30028000	merge.BND.1173	.	POLR1HASP	1
chr6	89540000	chr7	43182000	merge.BND.1174	ANKRD6	HECW1	0
chr8	145079000	chrY	57206000	merge.BND.1175	.	ENSG00000292369	0
chr9	809000	chrX	68654000	merge.BND.1176	.	STARD8	0
chr9	97256000	chrX	124351000	merge.BND.1177	SUGT1P4-STRA6LP-CCDC180	SH2D1A	0
chr10	12414000	chr17	81532000	merge.BND.1178	CAMK1D	FSCN2	0
chr10	13082000	chr6	32668000	merge.BND.1179	CCDC3	HLA-DQB1	0
chr10	133683000	chrY	10913000	merge.BND.1180	.	.	0
chr10	26894000	chr5	156667000	merge.BND.1181	.	SGCD	1
chr10	38513000	chrY	56826000	merge.BND.1182	.	.	0
chr10	5169000	chr3	129413000	merge.BND.1183	AKR1C8	EFCAB12	0
chr10	56576000	chrX	71499000	merge.BND.1184	.	TAF1	0
chr10	67849000	chr2	29802000	merge.BND.1185	.	ALK	0
chr10	69214000	chr2	119843000	merge.BND.1186	.	PTPN4	0
chr10	69214000	chr2	119845000	merge.BND.1187	.	PTPN4	0
chr10	79975000	chr13	23007000	merge.BND.1188	SFTPD	.	1
chr10	92378000	chr16	79831000	merge.BND.1189	.	.	1
chr11	101219000	chr3	32043000	merge.BND.1190	.	OSBPL10	0
chr11	102731000	chr5	149655000	merge.BND.1191	.	.	0
chr11	119648000	chr8	142255000	merge.BND.1192	USP2-AS1	TSNARE1	0
chr11	133739000	chr5	178548000	merge.BND.1193	.	COL23A1	0
chr11	20550000	chr8	145028000	merge.BND.1194	.	.	0
chr11	36310000	chr8	100426000	merge.BND.1195	PRR5L	ENSG00000253824	0
chr11	56536000	chr8	139463000	merge.BND.1196	.	ENSG00000254258	0
chr11	74212000	chr3	163386000	merge.BND.1197	PPME1	.	0
chr11	93137000	chr12	33864000	merge.BND.1198	.	.	1
chr11	93143000	chr22	22361000	merge.BND.1199	.	.	1
chr12	110881000	chr17	81532000	merge.BND.1200	CCDC63	FSCN2	0
chr12	122095000	chr19	18443000	merge.BND.1201	MLXIP	ELL	0
chr12	124094000	chr8	141756000	merge.BND.1202	RFLNA	.	0
chr12	127568000	chr9	133565000	merge.BND.1203	ENSG00000287622	ADAMTSL2	0
chr12	128084000	chr2	57230000	merge.BND.1204	.	.	0
chr12	132743000	chr5	3447000	merge.BND.1205	ANKLE2	LINC01019	0
chr12	14170000	chr22	26772000	merge.BND.1206	.	MIATNB	0
chr12	37487000	chr17	21668000	merge.BND.1207	.	.	0
chr12	37814000	chr2	169686000	merge.BND.1208	.	CFAP210	0
chr13	104245000	chr7	123212000	merge.BND.1209	.	.	0
chr13	27064000	chrY	11066000	merge.BND.1210	.	.	0
chr13	30842000	chr3	194325000	merge.BND.1211	.	.	0
chr13	30844000	chr15	94052000	merge.BND.1212	.	LINC01581	0
chr13	31755000	chr9	112516000	merge.BND.1213	RXFP2	KIAA1958	0
chr13	62689000	chrX	82980000	merge.BND.1214	LINC00448	.	1
chr13	78686000	chr3	81051000	merge.BND.1215	.	LINC02027	1
chr13	97339000	chr7	135716000	merge.BND.1216	MBNL2	SLC13A4	0
chr14	65792000	chr22	50340000	merge.BND.1217	.	.	0
chr14	65792000	chr22	50341000	merge.BND.1218	.	.	0
chr14	79257000	chr22	20163000	merge.BND.1219	NRXN3	.	0
chr14	79258000	chr22	20163000	merge.BND.1220	NRXN3	.	0
chr14	79258000	chr22	20164000	merge.BND.1221	NRXN3	.	0
chr14	89361000	chr21	43262000	merge.BND.1222	FOXN3	.	1
chr14	99953000	chr8	142255000	merge.BND.1223	.	TSNARE1	0
chr15	17084000	chr21	7257000	merge.BND.1224	.	.	0
chr15	20293000	chr16	32317000	merge.BND.1225	.	.	1
chr15	20293000	chr7	148373000	merge.BND.1226	.	CNTNAP2	0
chr15	20340000	chr22	16562000	merge.BND.1227	.	.	0
chr15	21113000	chr22	16562000	merge.BND.1228	.	.	0
chr15	26893000	chr19	55434000	merge.BND.1229	GABRA5	SHISA7	0
chr15	40562000	chr7	26213000	merge.BND.1230	CCDC32	CBX3	0
chr15	64577000	chr3	21144000	merge.BND.1231	ZNF609	SGO1-AS1	1
chr15	86095000	chr22	20491000	merge.BND.1232	AGBL1	KLHL22	0
chr15	90418000	chr5	85894000	merge.BND.1233	IQGAP1	.	1
chr16	20000	chrY	57207000	merge.BND.1234	ENSG00000260803	ENSG00000292369	0
chr16	33052000	chr7	62433000	merge.BND.1235	ENSG00000260141	.	0
chr16	33340000	chr2	90294000	merge.BND.1236	.	.	0
chr16	33751000	chrY	56822000	merge.BND.1237	ENSG00000282924	.	1
chr16	34063000	chrY	11331000	merge.BND.1238	.	.	0
chr16	74811000	chr7	20668000	merge.BND.1239	.	ABCB5	0
chr16	86665000	chr6	122848000	merge.BND.1240	ENSG00000261161	.	0
chr16	89013000	chr20	20338000	merge.BND.1241	.	CFAP61	0
chr17	21851000	chrY	56826000	merge.BND.1242	.	.	0
chr17	51897000	chr6	133114000	merge.BND.1243	CA10	.	0
chr17	56793000	chr21	43338000	merge.BND.1244	C17orf67	.	0
chr17	70459000	chr22	22361000	merge.BND.1245	.	.	0
chr17	74734000	chr18	11248000	merge.BND.1246	RAB37	.	0
chr17	81208000	chr19	55435000	merge.BND.1247	CEP131	SHISA7	0
chr18	24823000	chr21	8428000	merge.BND.1248	ENSG00000266573	ENSG00000280441	0
chr18	36463000	chr6	161874000	merge.BND.1249	FHOD3	PRKN	1
chr18	52310000	chr22	20955000	merge.BND.1250	.	.	0
chr18	58209000	chr3	126864000	merge.BND.1251	NEDD4L	CHCHD6	0
chr18	652000	chrX	2198000	merge.BND.1252	TYMSOS	.	0
chr18	75579000	chr8	72882000	merge.BND.1253	.	KCNB2	1
chr18	75847000	chr6	157548000	merge.BND.1254	ENSG00000266460	ZDHHC14	0
chr19	14764000	chr22	40008000	merge.BND.1255	ADGRE2	FAM83F	0
chr19	21689000	chr21	13596000	merge.BND.1256	.	.	0
chr19	29365000	chr3	113032000	merge.BND.1257	VSTM2B-DT	NEPRO-AS1	0
chr19	3333000	chr2	240640000	merge.BND.1258	NFIC	.	0
chr19	442000	chr21	45340000	merge.BND.1259	SHC2	LINC00316	0
chr19	44411000	chr3	91892000	merge.BND.1260	ENSG00000267188	.	0
chr19	45194000	chr6	134112000	merge.BND.1261	MARK4	ENSG00000287413	1
chr19	54134000	chr7	155793000	merge.BND.1262	.	.	0
chr19	55434000	chr9	35914000	merge.BND.1263	SHISA7	SPAAR	0
chr19	55435000	chr2	3046000	merge.BND.1264	SHISA7	LINC01250	0
chr1	110121000	chr22	20162000	merge.BND.1265	.	.	1
chr1	111260000	chr12	51455000	merge.BND.1266	.	SLC4A8	1
chr1	13328000	chr13	51161000	merge.BND.1267	.	C13orf42	0
chr1	155627000	chr12	55333000	merge.BND.1268	ENSG00000287839	.	1
chr1	166879000	chr12	107914000	merge.BND.1269	.	.	0
chr1	167057000	chr2	241864000	merge.BND.1270	GPA33	.	0
chr1	17166000	chr17	81535000	merge.BND.1271	.	FSCN2	1
chr1	178681000	chr7	138231000	merge.BND.1272	.	.	0
chr1	223559000	chr2	239869000	merge.BND.1273	CAPN8	.	0
chr1	244937000	chr9	129453000	merge.BND.1274	.	.	0
chr1	245798000	chr16	9153000	merge.BND.1275	SMYD3	.	0
chr1	247363000	chr19	3310000	merge.BND.1276	ENSG00000289728	.	0
chr1	248753000	chr13	26973000	merge.BND.1277	LYPD8	ENSG00000283579	1
chr1	37776000	chr10	92378000	merge.BND.1278	.	.	0
chr1	39889000	chr18	66876000	merge.BND.1279	.	.	0
chr1	46695000	chr10	69785000	merge.BND.1280	EFCAB14	.	0
chr1	51962000	chr12	95840000	merge.BND.1281	RAB3B	SNRPF-DT	1
chr1	52306000	chr6	32536000	merge.BND.1282	ZFYVE9	.	0
chr1	65562000	chr8	63798000	merge.BND.1283	LEPR	LINC01414	1
chr1	6742000	chr2	169465000	merge.BND.1284	.	.	0
chr1	77871000	chr19	23828000	merge.BND.1285	MIGA1	ENSG00000267924	0
chr1	86679000	chr2	92244000	merge.BND.1286	CLCA4-AS1	.	0
chr1	95139000	chr17	34978000	merge.BND.1287	TLCD4-RWDD3	CCT6B	0
chr20	22472000	chr8	138805000	merge.BND.1288	.	COL22A1	0
chr20	23989000	chr22	21131000	merge.BND.1289	.	.	0
chr20	24530000	chr8	142256000	merge.BND.1290	SYNDIG1	TSNARE1	0
chr20	25562000	chr7	100525000	merge.BND.1291	NINL	.	0
chr20	26634000	chr6	65618000	merge.BND.1292	.	EYS	0
chr20	30938000	chr9	79495000	merge.BND.1293	.	.	0
chr20	63443000	chr6	157238000	merge.BND.1294	KCNQ2	.	0
chr20	63444000	chr3	9300000	merge.BND.1295	KCNQ2	ENSG00000254485	0
chr21	10274000	chr22	18417000	merge.BND.1296	.	.	1
chr21	10324000	chr22	18207000	merge.BND.1297	.	.	0
chr21	10360000	chr22	18418000	merge.BND.1298	.	.	1
chr21	10420000	chr7	152389000	merge.BND.1299	ENSG00000290523	KMT2C	0
chr21	10427000	chr8	100427000	merge.BND.1300	ENSG00000290523	ENSG00000253824	0
chr21	18145000	chr7	49684000	merge.BND.1301	CHODL	.	1
chr21	22254000	chr9	112804000	merge.BND.1302	ENSG00000226043	SNX30	1
chr21	45636000	chr9	91696000	merge.BND.1303	.	ROR2	0
chr21	7262000	chrY	10869000	merge.BND.1304	.	.	0
chr21	9246000	chrY	11291000	merge.BND.1305	.	.	0
chr22	12692000	chrY	11310000	merge.BND.1306	.	.	0
chr22	20162000	chr7	98811000	merge.BND.1307	.	.	0
chr22	20955000	chr6	23801000	merge.BND.1308	.	.	0
chr22	43980000	chr4	7543000	merge.BND.1309	SAMM50	SORCS2	0
chr22	44778000	chr4	184754000	merge.BND.1310	ARHGAP8	.	0
chr22	45994000	chr7	240000	merge.BND.1311	.	FAM20C	1
chr22	46878000	chr5	174321000	merge.BND.1312	TBC1D22A	.	0
chr22	48757000	chr7	132564000	merge.BND.1313	TAFA5	PLXNA4	0
chr22	50338000	chrX	153383000	merge.BND.1314	.	.	0
chr2	104824000	chr8	142255000	merge.BND.1315	PANTR1	TSNARE1	0
chr2	111251000	chr21	43337000	merge.BND.1316	MIR4435-2HG	.	0
chr2	115441000	chr9	129442000	merge.BND.1317	DPP10	ENSG00000230676	0
chr2	1222000	chr8	1833000	merge.BND.1318	SNTG2	ARHGEF10	0
chr2	142116000	chr21	35527000	merge.BND.1319	LRP1B	RUNX1	0
chr2	208099000	chr20	56278000	merge.BND.1320	.	.	0
chr2	235803000	chr6	35169000	merge.BND.1321	AGAP1	.	0
chr2	238870000	chr3	51710000	merge.BND.1322	TWIST2	GRM2	0
chr2	241824000	chr22	38110000	merge.BND.1323	.	BAIAP2L2	1
chr2	31823000	chr6	85289000	merge.BND.1324	KRT18P52	KRT18P64	0
chr2	31823000	chrX	153605000	merge.BND.1325	KRT18P52	MRFAP1P1	1
chr2	46878000	chr8	130898000	merge.BND.1326	.	ADCY8	0
chr2	5489000	chr7	16826000	merge.BND.1327	.	AGR2	1
chr3	150819000	chr8	145028000	merge.BND.1328	SIAH2-AS1	.	0
chr3	185455000	chr6	69567000	merge.BND.1329	MAP3K13	.	0
chr3	75669000	chrY	56840000	merge.BND.1330	RPL23AP49	.	0
chr4	137828000	chrX	2227000	merge.BND.1331	.	DHRSX	0
chr4	190180000	chr5	49599000	merge.BND.1332	DUX4	.	0
chr4	79967000	chr5	21208000	merge.BND.1333	ANTXR2	.	1
chr5	109448000	chrY	10624000	merge.BND.1334	.	.	0
chr5	110145000	chr7	113782000	merge.BND.1335	.	.	1
chr5	167860000	chr6	32653000	merge.BND.1336	TENM2	.	0
chr6	15666000	chrX	141109000	merge.BND.1337	.	.	0
chr6	32536000	chrX	72734000	merge.BND.1338	.	.	0
chr6	89214000	chr7	91662000	merge.BND.1339	GABRR1	.	0
chr7	138231000	chr8	42646000	merge.BND.1340	.	.	0
chr8	142256000	chr9	135334000	merge.BND.1341	TSNARE1	.	0
chrX	944000	chrY	946000	merge.BND.1342	.	.	0
chr10	103251000	chr14	89362000	merge.BND.1343	NT5C2	FOXN3	0
chr10	124472000	chr4	35204000	merge.BND.1344	LHPP	.	1
chr10	124610000	chr3	10000	merge.BND.1345	LHPP	.	0
chr10	132173000	chr16	86064000	merge.BND.1346	JAKMIP3	.	0
chr10	133690000	chrY	56841000	merge.BND.1347	.	.	0
chr10	133787000	chr3	11000	merge.BND.1348	.	.	1
chr10	133787000	chrY	57207000	merge.BND.1349	.	ENSG00000292369	0
chr10	31972000	chr20	52092000	merge.BND.1350	.	ZFP64	0
chr10	42185000	chr2	94259000	merge.BND.1351	.	.	0
chr10	47181000	chr4	35204000	merge.BND.1352	.	.	0
chr10	49743000	chr19	55435000	merge.BND.1353	OGDHL	SHISA7	0
chr10	81212000	chr9	120223000	merge.BND.1354	.	.	1
chr10	8985000	chr22	18731000	merge.BND.1355	.	.	0
chr10	92377000	chr8	127613000	merge.BND.1356	.	ENSG00000286266	0
chr11	104119000	chr2	57229000	merge.BND.1357	PDGFD	.	1
chr11	11927000	chr2	216228000	merge.BND.1358	USP47	.	0
chr11	122824000	chrX	16183000	merge.BND.1359	ENSG00000285909	.	0
chr11	128930000	chr9	137394000	merge.BND.1360	.	EXD3	0
chr11	132126000	chr22	50339000	merge.BND.1361	NTM	.	0
chr11	1916000	chr14	100168000	merge.BND.1362	.	.	1
chr11	36310000	chr12	2438000	merge.BND.1363	PRR5L	CACNA1C	0
chr11	38791000	chr8	51819000	merge.BND.1364	.	PCMTD1	1
chr11	65464000	chr3	10134000	merge.BND.1365	ENSG00000291174	.	0
chr11	67832000	chr8	72882000	merge.BND.1366	ENPP7P7	KCNB2	1
chr11	70803000	chr17	82149000	merge.BND.1367	SHANK2	CCDC57	0
chr11	78879000	chr14	45636000	merge.BND.1368	TENM4	.	0
chr11	8977000	chr19	23845000	merge.BND.1369	NRIP3	ENSG00000267924	0
chr12	107914000	chr7	24079000	merge.BND.1370	.	.	0
chr12	120614000	chr16	88372000	merge.BND.1371	.	.	1
chr12	123453000	chr13	45425000	merge.BND.1372	.	.	1
chr12	124093000	chr9	130955000	merge.BND.1373	RFLNA	.	0
chr12	127158000	chrX	121081000	merge.BND.1374	ENSG00000286016	.	0
chr12	133265000	chr22	50808000	merge.BND.1375	.	.	0
chr12	37816000	chr2	169686000	merge.BND.1376	.	CFAP210	0
chr12	43524000	chr6	110691000	merge.BND.1377	ADAMTS20	CDK19	1
chr12	58076000	chr6	88834000	merge.BND.1378	.	RNGTT	1
chr12	81929000	chr5	4190000	merge.BND.1379	.	.	0
chr12	92531000	chr9	16490000	merge.BND.1380	MTCH2P2	BNC2	1
chr13	113425000	chr5	2160000	merge.BND.1381	ADPRHL1	.	1
chr13	113673000	chrX	68654000	merge.BND.1382	GRK1	STARD8	0
chr13	47733000	chrX	96064000	merge.BND.1383	.	.	1
chr13	97339000	chr2	20165000	merge.BND.1384	MBNL2	.	0
chr13	98473000	chr7	89925000	merge.BND.1385	STK24	STEAP2-AS1	0
chr14	37300000	chr16	61045000	merge.BND.1386	MIPOL1	.	1
chr14	63802000	chr2	224737000	merge.BND.1387	SYNE2	.	1
chr14	88797000	chr8	105381000	merge.BND.1388	.	ZFPM2	0
chr14	89361000	chr20	63694000	merge.BND.1389	FOXN3	RTEL1-TNFRSF6B	1
chr14	97136000	chr21	44420000	merge.BND.1390	.	TRPM2	0
chr14	99953000	chr21	43336000	merge.BND.1391	.	.	0
chr15	101981000	chr18	11000	merge.BND.1392	.	.	0
chr15	20293000	chr3	132225000	merge.BND.1393	.	CPNE4	0
chr15	20340000	chr2	90294000	merge.BND.1394	.	.	0
chr15	21107000	chr16	33340000	merge.BND.1395	.	.	0
chr15	29951000	chr22	43497000	merge.BND.1396	TJP1	MPPED1	0
chr15	42557000	chr6	23292000	merge.BND.1397	HAUS2	.	0
chr15	49051000	chr5	99144000	merge.BND.1398	.	.	0
chr15	50886000	chr6	27770000	merge.BND.1399	ENSG00000273674	.	1
chr15	73219000	chr22	10743000	merge.BND.1400	NEO1	.	0
chr15	94052000	chr19	55435000	merge.BND.1401	LINC01581	SHISA7	0
chr16	20000	chrX	156020000	merge.BND.1402	ENSG00000260803	ENSG00000270726	0
chr16	27139000	chr21	43338000	merge.BND.1403	.	.	0
chr16	34068000	chr17	26936000	merge.BND.1404	.	.	0
chr16	57707000	chr20	60314000	merge.BND.1405	DRC7	MIR646HG	0
chr16	86014000	chr5	3446000	merge.BND.1406	.	LINC01019	0
chr16	86603000	chr9	111153000	merge.BND.1407	.	ENSG00000227531	0
chr16	86862000	chr6	35170000	merge.BND.1408	.	.	1
chr17	20139000	chrX	30644000	merge.BND.1409	SPECC1	.	0
chr17	6562000	chr9	135096000	merge.BND.1410	.	OLFM1	0
chr17	66641000	chr6	13191000	merge.BND.1411	PRKCA	PHACTR1	1
chr17	81250000	chr2	235302000	merge.BND.1412	SLC38A10	.	0
chr18	11000	chr4	190123000	merge.BND.1413	.	.	0
chr18	49811000	chr2	41749000	merge.BND.1414	ENSG00000266997	.	1
chr18	50449000	chr3	38297000	merge.BND.1415	.	SLC22A14	1
chr18	50450000	chr7	92468000	merge.BND.1416	.	ENSG00000244055	1
chr18	52310000	chr22	20956000	merge.BND.1417	.	.	0
chr18	54050000	chr5	3995000	merge.BND.1418	.	.	0
chr18	70465000	chr7	154575000	merge.BND.1419	ENSG00000288828	DPP6	1
chr18	75579000	chr8	72876000	merge.BND.1420	.	ENSG00000253784	1
chr19	14596000	chr5	3446000	merge.BND.1421	CLEC17A	LINC01019	0
chr19	2016000	chr2	239659000	merge.BND.1422	BTBD2	.	0
chr19	23324000	chr7	132562000	merge.BND.1423	ZNF91	PLXNA4	0
chr19	2568000	chr8	40820000	merge.BND.1424	GNG7	ZMAT4	0
chr19	29898000	chr6	153109000	merge.BND.1425	.	RGS17	0
chr19	48044000	chr21	43336000	merge.BND.1426	CABP5	.	1
chr19	48044000	chr21	43337000	merge.BND.1427	CABP5	.	0
chr19	4962000	chr8	51791000	merge.BND.1428	UHRF1	PXDNL	1
chr19	54134000	chr5	179364000	merge.BND.1429	.	.	0
chr19	54134000	chr7	155792000	merge.BND.1430	.	.	0
chr19	55671000	chr9	133668000	merge.BND.1431	ENSG00000267523	SARDH	0
chr19	58587000	chr20	64287000	merge.BND.1432	ENSG00000286104	PCMTD2	0
chr1	110120000	chr8	142256000	merge.BND.1433	.	TSNARE1	0
chr1	111260000	chr8	54032000	merge.BND.1434	.	.	0
chr1	11374000	chr13	30845000	merge.BND.1435	.	.	0
chr1	150744000	chrX	116596000	merge.BND.1436	CTSS	.	0
chr1	16352000	chr3	126559000	merge.BND.1437	FBXO42	.	0
chr1	181248000	chr3	32043000	merge.BND.1438	.	OSBPL10	0
chr1	206005000	chr3	194326000	merge.BND.1439	.	.	0
chr1	212801000	chr12	110869000	merge.BND.1440	TATDN3	CCDC63	1
chr1	235079000	chr2	3971000	merge.BND.1441	.	LINC01304	0
chr1	240563000	chr22	27632000	merge.BND.1442	GREM2	.	0
chr1	246614000	chr16	6214000	merge.BND.1443	CNST	RBFOX1	0
chr1	247363000	chr19	48763000	merge.BND.1444	ENSG00000289728	.	0
chr1	247363000	chr7	159207000	merge.BND.1445	ENSG00000289728	.	0
chr1	248755000	chrX	153383000	merge.BND.1446	LYPD8	.	0
chr1	29554000	chr21	10427000	merge.BND.1447	.	ENSG00000290523	0
chr1	3261000	chr20	63443000	merge.BND.1448	PRDM16	KCNQ2	0
chr1	44796000	chr12	123453000	merge.BND.1449	.	.	0
chr1	46240000	chr2	142822000	merge.BND.1450	.	.	0
chr1	85933000	chr11	48734000	merge.BND.1451	COL24A1	.	0
chr20	28557000	chr7	154574000	merge.BND.1452	.	DPP6	0
chr20	28557000	chr9	63827000	merge.BND.1453	.	.	1
chr20	28737000	chr21	10815000	merge.BND.1454	.	.	0
chr20	28780000	chr22	13021000	merge.BND.1455	.	.	0
chr20	28889000	chr22	11211000	merge.BND.1456	.	.	1
chr20	28890000	chrY	10646000	merge.BND.1457	.	.	0
chr20	29337000	chr22	11587000	merge.BND.1458	.	.	1
chr20	29369000	chr3	198123000	merge.BND.1459	.	ENSG00000236246	1
chr20	30425000	chr7	154574000	merge.BND.1460	.	DPP6	0
chr20	30456000	chr22	12425000	merge.BND.1461	.	.	1
chr20	51456000	chr5	180135000	merge.BND.1462	NFATC2	RASGEF1C	0
chr20	53405000	chr6	87508000	merge.BND.1463	ENSG00000271774	ENSG00000213204	0
chr20	63049000	chr7	132563000	merge.BND.1464	LINC01056	PLXNA4	0
chr20	63444000	chr6	170184000	merge.BND.1465	KCNQ2	ENSG00000230960	0
chr21	10427000	chr7	98811000	merge.BND.1466	ENSG00000290523	.	0
chr21	18561000	chr8	90685000	merge.BND.1467	.	TMEM64	0
chr21	41673000	chrX	68653000	merge.BND.1468	.	STARD8	0
chr21	43262000	chr22	43497000	merge.BND.1469	.	MPPED1	1
chr21	43336000	chr8	142257000	merge.BND.1470	.	TSNARE1	1
chr21	43336000	chr9	89672000	merge.BND.1471	.	LINC03062	0
chr21	7262000	chrY	10957000	merge.BND.1472	.	.	0
chr22	12190000	chr4	49324000	merge.BND.1473	.	.	1
chr22	20163000	chr7	141337000	merge.BND.1474	.	TMEM178B	0
chr22	20164000	chr9	130959000	merge.BND.1475	.	.	1
chr22	28060000	chr7	96853000	merge.BND.1476	TTC28	.	1
chr22	35344000	chr7	76999000	merge.BND.1477	TOM1	DTX2P1	0
chr22	36242000	chr6	13128000	merge.BND.1478	.	PHACTR1	1
chr22	43497000	chr8	100427000	merge.BND.1479	MPPED1	ENSG00000253824	1
chr2	118487000	chr3	111556000	merge.BND.1480	.	CD96	1
chr2	121612000	chr9	134025000	merge.BND.1481	CLASP1	.	0
chr2	132824000	chr6	13128000	merge.BND.1482	NCKAP5	PHACTR1	0
chr2	161279000	chr22	11704000	merge.BND.1483	PSMD14-DT	.	0
chr2	169465000	chr6	28713000	merge.BND.1484	.	.	0
chr2	224737000	chr6	133114000	merge.BND.1485	.	.	0
chr2	241897000	chr7	76998000	merge.BND.1486	LINC01237	DTX2P1	0
chr2	64376000	chr21	10427000	merge.BND.1487	.	ENSG00000290523	1
chr2	94259000	chr22	10687000	merge.BND.1488	.	.	0
chr3	101414000	chr6	32551000	merge.BND.1489	SENP7	.	0
chr3	11000	chrY	57207000	merge.BND.1490	.	ENSG00000292369	0
chr3	198170000	chr9	138231000	merge.BND.1491	ENSG00000290937	ENSG00000290585	1
chr3	20301000	chr8	73167000	merge.BND.1492	SGO1-AS1	.	1
chr3	46803000	chr8	149000	merge.BND.1493	ENSG00000284672	.	0
chr3	68128000	chr9	129411000	merge.BND.1494	TAFA1	.	0
chr3	80541000	chr7	49686000	merge.BND.1495	.	.	0
chr3	98191000	chr4	91046000	merge.BND.1496	.	CCSER1	0
chr4	138553000	chr5	110145000	merge.BND.1497	LINC00499	.	1
chr4	190079000	chrY	11334000	merge.BND.1498	DUX4L5	.	0
chr4	35204000	chrX	53750000	merge.BND.1499	.	.	0
chr4	5706000	chr7	138622000	merge.BND.1500	EVC2	SVOPL	1
chr4	7295000	chr7	1447000	merge.BND.1501	SORCS2	MICALL2	0
chr4	91046000	chrX	103767000	merge.BND.1502	CCSER1	ENSG00000288597	1
chr5	32338000	chrM	13000	merge.BND.1503	.	MT-ND5	0
chr5	7262000	chr6	148646000	merge.BND.1504	.	.	0
chr6	13503000	chr7	70197000	merge.BND.1505	.	AUTS2	0
chr6	148739000	chr7	65229000	merge.BND.1506	.	INTS4P1	1
chr7	1037000	chr9	88627000	merge.BND.1507	C7orf50	.	0
chr7	49684000	chrX	77191000	merge.BND.1508	.	.	0
chr8	129496000	chrX	117426000	merge.BND.1509	CCDC26	.	0
chr8	1338000	chrY	2521000	merge.BND.1510	DLGAP2	.	0
chrX	946000	chrY	944000	merge.BND.1511	.	.	0
chr10	103251000	chr9	400000	merge.BND.1512	NT5C2	DOCK8	0
chr10	128465000	chr3	126863000	merge.BND.1513	.	CHCHD6	0
chr10	132821000	chr19	55435000	merge.BND.1514	CFAP46	SHISA7	0
chr10	133690000	chr4	190176000	merge.BND.1515	.	DUX4	0
chr10	26894000	chr8	139463000	merge.BND.1516	.	ENSG00000254258	1
chr10	26894000	chr8	7507000	merge.BND.1517	.	DEFB107B	0
chr10	31972000	chr12	101484000	merge.BND.1518	.	SPIC	0
chr10	41904000	chr3	48157000	merge.BND.1519	.	.	0
chr10	80533000	chr16	75468000	merge.BND.1520	TSPAN14	.	0
chr10	92378000	chr5	142000000	merge.BND.1521	.	GNPDA1	0
chr10	92378000	chr6	153109000	merge.BND.1522	.	RGS17	0
chr10	95197000	chr9	129446000	merge.BND.1523	ACSM6	ENSG00000230676	0
chr10	99837000	chr16	79831000	merge.BND.1524	ABCC2	.	0
chr10	99838000	chr6	153109000	merge.BND.1525	ABCC2	RGS17	0
chr11	107785000	chr3	32786000	merge.BND.1526	.	RPL23AP43	0
chr11	1170000	chr14	104445000	merge.BND.1527	MUC5AC	.	0
chr11	133739000	chr3	51710000	merge.BND.1528	.	GRM2	0
chr11	25102000	chr2	193212000	merge.BND.1529	.	.	1
chr11	356000	chr8	132893000	merge.BND.1530	.	TG	0
chr11	3584000	chr3	125771000	merge.BND.1531	.	ENSG00000284624	0
chr11	36507000	chr2	180702000	merge.BND.1532	TRAF6	SCHLAP1	0
chr11	59283000	chr2	68451000	merge.BND.1533	ENSG00000214797	.	0
chr11	59283000	chr7	123212000	merge.BND.1534	ENSG00000214797	.	0
chr11	63350000	chrY	10624000	merge.BND.1535	.	.	0
chr11	64706000	chr6	100608000	merge.BND.1536	NRXN2	ASCC3	0
chr11	66395000	chr12	95840000	merge.BND.1537	.	SNRPF-DT	1
chr11	66395000	chr22	40744000	merge.BND.1538	.	.	0
chr11	69918000	chr7	75255000	merge.BND.1539	.	.	0
chr11	71520000	chr4	74344000	merge.BND.1540	NADSYN1	.	1
chr12	105679000	chr2	225987000	merge.BND.1541	.	.	1
chr12	118708000	chr9	130959000	merge.BND.1542	.	.	0
chr12	131478000	chr18	77258000	merge.BND.1543	ENSG00000256209	GALR1	0
chr12	23523000	chr17	12351000	merge.BND.1544	.	.	0
chr12	2438000	chr17	44985000	merge.BND.1545	CACNA1C	NMT1	0
chr12	2572000	chr7	66099000	merge.BND.1546	CACNA1C	ENSG00000249319	0
chr12	2683000	chr7	154576000	merge.BND.1547	CACNA1C	DPP6	0
chr12	33864000	chr8	72882000	merge.BND.1548	.	KCNB2	1
chr12	3505000	chr6	13503000	merge.BND.1549	PRMT8	.	0
chr12	37661000	chr19	27373000	merge.BND.1550	.	.	0
chr12	43524000	chr2	180361000	merge.BND.1551	ADAMTS20	.	0
chr12	52950000	chr2	31823000	merge.BND.1552	KRT18	KRT18P52	0
chr12	55334000	chr22	18939000	merge.BND.1553	.	ENSG00000284294	1
chr12	70060000	chr8	124874000	merge.BND.1554	PRANCR	LINC00964	1
chr12	70201000	chr2	47583000	merge.BND.1555	PRANCR	MSH2	1
chr12	71860000	chrX	49140000	merge.BND.1556	TBC1D15	.	0
chr12	8442000	chr8	8040000	merge.BND.1557	ENSG00000288954	OR7E96P	0
chr12	95843000	chr13	51161000	merge.BND.1558	SNRPF-DT	C13orf42	1
chr13	30845000	chr19	18443000	merge.BND.1559	.	ELL	0
chr13	49312000	chr5	38146000	merge.BND.1560	CAB39L	LINC02119	0
chr13	62688000	chrX	82981000	merge.BND.1561	LINC00448	.	0
chr13	92539000	chr2	123234000	merge.BND.1562	GPC5	.	0
chr13	93201000	chrX	93124000	merge.BND.1563	.	.	1
chr13	95025000	chr16	28089000	merge.BND.1564	ABCC4	.	1
chr14	100169000	chr17	489000	merge.BND.1565	.	.	0
chr14	100169000	chr18	37284000	merge.BND.1566	.	CELF4	0
chr14	101608000	chr20	19663000	merge.BND.1567	DIO3OS	SLC24A3	0
chr14	21420000	chr4	155463000	merge.BND.1568	CHD8	MTND1P22	1
chr14	24486000	chr18	15095000	merge.BND.1569	ENSG00000258744	ENSG00000263635	1
chr14	81117000	chr22	10743000	merge.BND.1570	ENSG00000284959	.	1
chr14	89361000	chr7	155891000	merge.BND.1571	FOXN3	.	0
chr14	89362000	chr20	63693000	merge.BND.1572	FOXN3	RTEL1-TNFRSF6B	1
chr14	90446000	chr6	87239000	merge.BND.1573	.	ZNF292	0
chr14	91666000	chr3	151665000	merge.BND.1574	CATSPERB	.	1
chr14	95420000	chr17	81531000	merge.BND.1575	SYNE3	FSCN2	0
chr14	99928000	chr17	44985000	merge.BND.1576	EML1	NMT1	0
chr15	101981000	chr3	198173000	merge.BND.1577	.	ENSG00000290937	1
chr15	17084000	chrY	10759000	merge.BND.1578	.	.	0
chr15	17084000	chrY	10941000	merge.BND.1579	.	.	0
chr15	21113000	chr2	90294000	merge.BND.1580	.	.	0
chr15	25528000	chr9	401000	merge.BND.1581	LINC02250	DOCK8	0
chr15	29132000	chr3	126862000	merge.BND.1582	ENTREP2	CHCHD6	0
chr15	29949000	chr21	43262000	merge.BND.1583	TJP1	.	0
chr15	30173000	chr22	50338000	merge.BND.1584	ENSG00000259906	.	0
chr15	40051000	chr7	36516000	merge.BND.1585	SRP14-DT	AOAH	0
chr15	44785000	chr7	142315000	merge.BND.1586	.	.	0
chr15	45285000	chr19	24082000	merge.BND.1587	.	ZNF254	0
chr15	45697000	chr3	48210000	merge.BND.1588	.	.	0
chr15	60366000	chr6	36946000	merge.BND.1589	ANXA2	.	0
chr16	33340000	chr22	16569000	merge.BND.1590	.	.	0
chr16	36261000	chr8	27120000	merge.BND.1591	.	.	1
chr16	52754000	chr21	38508000	merge.BND.1592	.	ENSG00000287470	0
chr17	31476000	chr6	2384000	merge.BND.1593	RAB11FIP4	ENSG00000286512	0
chr17	41633000	chr21	42615000	merge.BND.1594	KRT42P	LINC01671	0
chr17	41633000	chr7	150911000	merge.BND.1595	KRT42P	.	0
chr17	5056000	chr19	40117000	merge.BND.1596	.	.	0
chr17	81208000	chr22	50340000	merge.BND.1597	CEP131	.	0
chr17	81531000	chr2	38712000	merge.BND.1598	FSCN2	GALM	0
chr17	81743000	chrX	68653000	merge.BND.1599	.	STARD8	1
chr17	81793000	chrX	68654000	merge.BND.1600	.	STARD8	1
chr17	82802000	chr19	40966000	merge.BND.1601	TBCD	.	1
chr18	109000	chrY	11323000	merge.BND.1602	.	.	0
chr18	14493000	chrX	81069000	merge.BND.1603	CXADRP3	.	0
chr18	36463000	chr3	96620000	merge.BND.1604	FHOD3	.	0
chr18	668000	chr9	89672000	merge.BND.1605	TYMS	LINC03062	0
chr18	80258000	chrY	57217000	merge.BND.1606	.	.	0
chr19	1670000	chr5	1097000	merge.BND.1607	.	SLC12A7	0
chr19	1670000	chrX	2229000	merge.BND.1608	.	DHRSX	0
chr19	38603000	chrX	136451000	merge.BND.1609	MAP4K1	.	0
chr19	45194000	chr9	70611000	merge.BND.1610	MARK4	TRPM3	0
chr19	49868000	chr6	17250000	merge.BND.1611	PNKP	ENSG00000287559	0
chr19	50500000	chr5	11817000	merge.BND.1612	ENSG00000289950	CTNND2	0
chr19	55434000	chr22	49974000	merge.BND.1613	SHISA7	.	0
chr19	55434000	chr9	89731000	merge.BND.1614	SHISA7	.	0
chr1	10000	chr4	190117000	merge.BND.1615	.	.	0
chr1	11525000	chr22	38189000	merge.BND.1616	DISP3	PLA2G6	0
chr1	116437000	chr12	82901000	merge.BND.1617	LINC01762	TMTC2	1
chr1	13328000	chr20	52092000	merge.BND.1618	.	ZFP64	0
chr1	14493000	chr19	55435000	merge.BND.1619	KAZN	SHISA7	0
chr1	14493000	chr22	50338000	merge.BND.1620	KAZN	.	0
chr1	168410000	chr3	186718000	merge.BND.1621	ENSG00000228697	HRG-AS1	1
chr1	168472000	chr13	45424000	merge.BND.1622	ENSG00000228697	.	1
chr1	179606000	chr12	41844000	merge.BND.1623	TDRD5	ENSG00000257239	0
chr1	179606000	chr7	49686000	merge.BND.1624	TDRD5	.	0
chr1	19061000	chr21	43338000	merge.BND.1625	.	.	0
chr1	19062000	chr8	142255000	merge.BND.1626	.	TSNARE1	1
chr1	207214000	chr7	123213000	merge.BND.1627	.	.	0
chr1	211222000	chr12	107914000	merge.BND.1628	.	.	0
chr1	242046000	chr22	11547000	merge.BND.1629	.	.	1
chr1	245799000	chr16	9154000	merge.BND.1630	SMYD3	.	0
chr1	247363000	chr13	111460000	merge.BND.1631	ENSG00000289728	.	0
chr1	247363000	chr22	34397000	merge.BND.1632	ENSG00000289728	.	0
chr1	247363000	chr5	11817000	merge.BND.1633	ENSG00000289728	CTNND2	0
chr1	248519000	chr2	179634000	merge.BND.1634	OR2G6	ZNF385B	0
chr1	248754000	chr12	2683000	merge.BND.1635	LYPD8	CACNA1C	0
chr1	248754000	chr17	81793000	merge.BND.1636	LYPD8	.	0
chr1	248946000	chr3	198173000	merge.BND.1637	.	ENSG00000290937	1
chr1	27086000	chr22	50338000	merge.BND.1638	.	.	0
chr1	3017000	chr13	98473000	merge.BND.1639	.	STK24	0
chr1	45498000	chr14	76750000	merge.BND.1640	CCDC163	VASH1-DT	0
chr1	51962000	chr6	56894000	merge.BND.1641	RAB3B	DST	0
chr1	53525000	chr5	3392000	merge.BND.1642	GLIS1	LINC01019	0
chr1	71928000	chrX	81674000	merge.BND.1643	NEGR1	.	0
chr1	84058000	chr6	13191000	merge.BND.1644	ENSG00000285201	PHACTR1	0
chr1	86679000	chr14	39406000	merge.BND.1645	CLCA4-AS1	FBXO33	0
chr1	94957000	chr3	169484000	merge.BND.1646	CNN3-DT	MECOM	0
chr20	28557000	chr7	157299000	merge.BND.1647	.	.	0
chr20	30945000	chr8	98589000	merge.BND.1648	.	STK3	0
chr20	36314000	chr3	5240000	merge.BND.1649	DLGAP4	.	0
chr20	57975000	chr22	20162000	merge.BND.1650	.	.	0
chr20	63443000	chr6	160457000	merge.BND.1651	KCNQ2	LPAL2	0
chr21	10270000	chr22	18203000	merge.BND.1652	.	FAM230D	1
chr21	10270000	chr22	18422000	merge.BND.1653	.	.	1
chr21	10270000	chr22	23487000	merge.BND.1654	.	.	0
chr21	10274000	chr22	18418000	merge.BND.1655	.	.	0
chr21	17292000	chr7	1037000	merge.BND.1656	.	C7orf50	0
chr21	38060000	chr8	142256000	merge.BND.1657	KCNJ6	TSNARE1	0
chr21	43337000	chr6	157270000	merge.BND.1658	.	.	0
chr21	43337000	chr8	141779000	merge.BND.1659	.	.	0
chr21	43338000	chr4	6513000	merge.BND.1660	.	PPP2R2C	1
chr21	43960000	chr6	169373000	merge.BND.1661	AGPAT3	LINC02519	0
chr21	46055000	chr7	381000	merge.BND.1662	.	ENSG00000249574	0
chr21	6566000	chr22	50341000	merge.BND.1663	.	.	0
chr22	11211000	chr3	93470000	merge.BND.1664	.	.	1
chr22	12310000	chr4	189882000	merge.BND.1665	.	FRG1-DT	0
chr22	12692000	chrY	11308000	merge.BND.1666	.	DUX4L16	1
chr22	12694000	chrY	11334000	merge.BND.1667	.	.	0
chr22	18897000	chr7	142045000	merge.BND.1668	.	MGAM	0
chr22	22132000	chrY	5612000	merge.BND.1669	.	PCDH11Y	1
chr22	43495000	chr7	158595000	merge.BND.1670	MPPED1	.	1
chr22	44984000	chr8	142255000	merge.BND.1671	PHF21B	TSNARE1	0
chr2	10399000	chr21	43337000	merge.BND.1672	HPCAL1	.	0
chr2	111252000	chr8	142255000	merge.BND.1673	MIR4435-2HG	TSNARE1	0
chr2	118488000	chr8	127522000	merge.BND.1674	.	.	1
chr2	161892000	chr4	21159000	merge.BND.1675	SLC4A10	KCNIP4	1
chr2	174002000	chrX	30644000	merge.BND.1676	.	.	1
chr2	193454000	chr3	151665000	merge.BND.1677	.	.	1
chr2	207612000	chr5	79131000	merge.BND.1678	METTL21A	DMGDH	0
chr2	212851000	chr22	20491000	merge.BND.1679	ENSG00000273118	KLHL22	0
chr2	213306000	chrX	40781000	merge.BND.1680	SPAG16	.	0
chr2	22968000	chr9	112798000	merge.BND.1681	.	SNX30	1
chr2	231898000	chr3	77789000	merge.BND.1682	.	.	0
chr2	238870000	chrX	153384000	merge.BND.1683	TWIST2	.	0
chr2	238872000	chrX	153383000	merge.BND.1684	TWIST2	.	0
chr2	241518000	chr6	3777000	merge.BND.1685	.	.	0
chr2	24846000	chr6	133114000	merge.BND.1686	ADCY3	.	0
chr2	32871000	chr5	169950000	merge.BND.1687	LINC00486	INSYN2B	0
chr2	41378000	chrX	121081000	merge.BND.1688	.	.	0
chr2	42013000	chr7	142043000	merge.BND.1689	.	MGAM	0
chr2	47700000	chr4	167951000	merge.BND.1690	MSH6	ENSG00000248601	0
chr2	53554000	chr6	32536000	merge.BND.1691	ASB3	.	0
chr2	68688000	chr5	65172000	merge.BND.1692	ARHGAP25	ADAMTS6	1
chr2	94188000	chr20	26955000	merge.BND.1693	.	.	1
chr2	94188000	chr9	63366000	merge.BND.1694	.	ENSG00000290549	1
chr3	10134000	chrX	137051000	merge.BND.1695	.	ENSG00000291054	0
chr3	10366000	chr6	169373000	merge.BND.1696	ATP2B2	LINC02519	0
chr3	10366000	chr9	36764000	merge.BND.1697	ATP2B2	.	0
chr3	127290000	chrX	155470000	merge.BND.1698	.	TMLHE-AS1	0
chr3	143450000	chr6	14693000	merge.BND.1699	SLC9A9	ENSG00000234261	0
chr3	145016000	chr7	22814000	merge.BND.1700	.	TOMM7	0
chr3	153236000	chr6	61323000	merge.BND.1701	.	.	0
chr3	153523000	chr9	9008000	merge.BND.1702	LINC02006	PTPRD	0
chr3	18789000	chrX	102560000	merge.BND.1703	SATB1-AS1	NXF4	0
chr3	32786000	chr6	14955000	merge.BND.1704	RPL23AP43	ENSG00000234261	0
chr3	3790000	chr6	49922000	merge.BND.1705	SUMF1	.	0
chr3	48210000	chr9	33455000	merge.BND.1706	.	.	0
chr3	55755000	chrX	11941000	merge.BND.1707	ERC2	FRMPD4	1
chr3	59386000	chr6	2324000	merge.BND.1708	CFAP20DC-DT	GMDS-DT	0
chr3	77779000	chr4	160791000	merge.BND.1709	.	.	1
chr3	89461000	chr4	65548000	merge.BND.1710	EPHA3	EPHA5	0
chr3	89461000	chr8	74811000	merge.BND.1711	EPHA3	ENSG00000253706	1
chr4	102464000	chrX	151073000	merge.BND.1712	.	.	0
chr4	107357000	chr5	110145000	merge.BND.1713	.	.	0
chr4	107357000	chr5	33633000	merge.BND.1714	.	ADAMTS12	0
chr4	188217000	chr6	132601000	merge.BND.1715	.	ENSG00000286663	0
chr4	190117000	chrY	57217000	merge.BND.1716	.	.	0
chr4	190123000	chr8	145079000	merge.BND.1717	.	.	0
chr4	190123000	chr9	10000	merge.BND.1718	.	.	0
chr4	49101000	chrY	11319000	merge.BND.1719	.	.	0
chr4	49711000	chrY	56838000	merge.BND.1720	.	.	1
chr4	52200000	chrX	68654000	merge.BND.1721	.	STARD8	0
chr4	5706000	chrY	945000	merge.BND.1722	EVC2	.	0
chr4	61940000	chr9	41048000	merge.BND.1723	ADGRL3	PGM5P2	0
chr5	11241000	chr6	2376000	merge.BND.1724	CTNND2	ENSG00000286512	0
chr5	113531000	chrX	2198000	merge.BND.1725	YTHDC2	.	0
chr5	118864000	chr9	66341000	merge.BND.1726	DTWD2	.	0
chr5	79131000	chr7	1145000	merge.BND.1727	DMGDH	.	0
chr6	142129000	chr7	25042000	merge.BND.1728	NMBR	.	1
chr6	160457000	chr8	142256000	merge.BND.1729	LPAL2	TSNARE1	0
chr6	161875000	chr7	11162000	merge.BND.1730	PRKN	PHF14	0
chr6	166288000	chrX	110689000	merge.BND.1731	.	CHRDL1	1
chr6	169372000	chrX	68654000	merge.BND.1732	LINC02519	STARD8	0
chr7	1040000	chr9	88626000	merge.BND.1733	C7orf50	.	0
chr7	140388000	chr8	87137000	merge.BND.1734	SLC37A3	CNBD1	0
chr7	141001000	chr9	37596000	merge.BND.1735	.	ENSG00000255872	0
chr7	1618000	chr8	21767000	merge.BND.1736	.	GFRA2	0
chr7	17055000	chrX	11935000	merge.BND.1737	ENSG00000237773	FRMPD4	0
chr7	6027000	chr8	38060000	merge.BND.1738	EIF2AK1	EIF4EBP1	0
chr8	131640000	chrX	41775000	merge.BND.1739	.	CASK	0
chr8	132908000	chrX	7086000	merge.BND.1740	TG	PUDP	0
chr8	145079000	chrX	156020000	merge.BND.1741	.	ENSG00000270726	0
chr9	130959000	chrX	3525000	merge.BND.1742	.	.	1
chr10	12413000	chr17	81533000	merge.BND.1743	CAMK1D	FSCN2	0
chr10	124611000	chr20	45313000	merge.BND.1744	LHPP	RBPJL	0
chr10	126892000	chr19	11465000	merge.BND.1745	.	ELAVL3	0
chr10	133683000	chrY	11334000	merge.BND.1746	.	.	0
chr10	133684000	chrY	11318000	merge.BND.1747	DUX4L20	.	1
chr10	133690000	chr4	49712000	merge.BND.1748	.	.	0
chr10	133690000	chrY	11309000	merge.BND.1749	.	.	0
chr10	133690000	chrY	11324000	merge.BND.1750	.	.	0
chr10	133761000	chrY	11334000	merge.BND.1751	DUX4L15	.	0
chr10	133764000	chrY	11308000	merge.BND.1752	.	DUX4L16	1
chr10	133787000	chr12	133265000	merge.BND.1753	.	.	0
chr10	15915000	chr2	90371000	merge.BND.1754	.	.	0
chr10	23332000	chr9	127883000	merge.BND.1755	C10orf67	ENSG00000257524	0
chr10	24100000	chr12	70945000	merge.BND.1756	KIAA1217	.	1
chr10	26893000	chr5	156658000	merge.BND.1757	.	SGCD	1
chr10	26939000	chr4	189916000	merge.BND.1758	FAM238C	FRG1-DT	0
chr10	38530000	chr22	10730000	merge.BND.1759	.	.	1
chr10	42163000	chr17	21826000	merge.BND.1760	.	.	1
chr10	45026000	chr11	71563000	merge.BND.1761	ENSG00000277757	.	0
chr10	6405000	chr11	68645000	merge.BND.1762	.	.	0
chr10	80639000	chr12	31020000	merge.BND.1763	SH2D4B	DDX11-AS1	0
chr10	84602000	chr2	237212000	merge.BND.1764	.	.	0
chr10	92378000	chr2	142822000	merge.BND.1765	.	.	0
chr10	99841000	chr15	45697000	merge.BND.1766	ABCC2	.	0
chr10	99841000	chr8	127613000	merge.BND.1767	ABCC2	ENSG00000286266	0
chr11	103026000	chr6	49922000	merge.BND.1768	.	.	0
chr11	114843000	chr5	66388000	merge.BND.1769	.	ENSG00000251391	0
chr11	114843000	chr6	162995000	merge.BND.1770	.	PACRG	0
chr11	118717000	chr5	7262000	merge.BND.1771	ENSG00000255422	.	0
chr11	122017000	chr20	35098000	merge.BND.1772	ENSG00000286023	.	0
chr11	18649000	chr15	34376000	merge.BND.1773	.	.	1
chr11	21865000	chr16	71947000	merge.BND.1774	ANO5	PKD1L3	0
chr11	24328000	chr5	110145000	merge.BND.1775	.	.	0
chr11	312000	chr15	70944000	merge.BND.1776	IFITM1	LRRC49	0
chr11	318000	chr5	117379000	merge.BND.1777	.	.	1
chr11	36310000	chr17	44985000	merge.BND.1778	PRR5L	NMT1	1
chr11	36558000	chr3	152984000	merge.BND.1779	RAG1	.	0
chr11	44505000	chr6	44182000	merge.BND.1780	.	CAPN11	0
chr11	49862000	chrM	16000	merge.BND.1781	ENSG00000288177	MT-TP	0
chr11	63529000	chrX	121080000	merge.BND.1782	.	.	0
chr11	68889000	chr20	9129000	merge.BND.1783	.	PLCB4	0
chr11	90260000	chr9	87051000	merge.BND.1784	DISC1FP1	.	1
chr11	93137000	chr2	36343000	merge.BND.1785	.	.	0
chr11	95436000	chr6	13191000	merge.BND.1786	.	PHACTR1	0
chr12	105679000	chr2	225988000	merge.BND.1787	.	.	0
chr12	107998000	chr22	23510000	merge.BND.1788	.	.	1
chr12	11098000	chr2	241836000	merge.BND.1789	TAS2R14	.	1
chr12	117377000	chr17	70465000	merge.BND.1790	NOS1	.	1
chr12	118708000	chr21	43262000	merge.BND.1791	.	.	0
chr12	123453000	chr2	169466000	merge.BND.1792	.	.	0
chr12	126832000	chr7	132563000	merge.BND.1793	.	PLXNA4	0
chr12	131478000	chr18	77260000	merge.BND.1794	ENSG00000256209	GALR1	0
chr12	132743000	chr16	89069000	merge.BND.1795	ANKLE2	.	0
chr12	132743000	chr5	3446000	merge.BND.1796	ANKLE2	LINC01019	0
chr12	133265000	chr3	11000	merge.BND.1797	.	.	0
chr12	2572000	chr20	63049000	merge.BND.1798	CACNA1C	LINC01056	0
chr12	29933000	chr20	30842000	merge.BND.1799	.	.	1
chr12	37694000	chr19	27373000	merge.BND.1800	.	.	0
chr12	40146000	chr4	35203000	merge.BND.1801	.	.	0
chr12	42088000	chr9	40352000	merge.BND.1802	GXYLT1	.	0
chr12	58328000	chr6	160850000	merge.BND.1803	.	.	0
chr12	66034000	chr7	91245000	merge.BND.1804	.	.	0
chr12	8442000	chr2	158888000	merge.BND.1805	ENSG00000288954	.	0
chr12	88701000	chr9	40127000	merge.BND.1806	.	.	0
chr12	90092000	chrX	90456000	merge.BND.1807	ENSG00000258216	.	0
chr12	95839000	chr2	174088000	merge.BND.1808	SNRPF-DT	OLA1	0
chr13	108279000	chr7	66099000	merge.BND.1809	TNFSF13B	ENSG00000249319	0
chr13	113673000	chr2	241864000	merge.BND.1810	GRK1	.	0
chr13	114343000	chr4	190099000	merge.BND.1811	.	.	1
chr13	18212000	chr22	18734000	merge.BND.1812	FAM230C	FAM230E	0
chr13	18212000	chr22	21326000	merge.BND.1813	FAM230C	.	0
chr13	18213000	chr22	18387000	merge.BND.1814	FAM230C	FAM230J	0
chr13	18213000	chr22	18893000	merge.BND.1815	FAM230C	FAM230F	0
chr13	23558000	chr14	65792000	merge.BND.1816	.	.	0
chr13	30842000	chr15	94051000	merge.BND.1817	.	LINC01581	0
chr13	30842000	chr8	53594000	merge.BND.1818	.	.	0
chr13	30843000	chr6	39845000	merge.BND.1819	.	DAAM2	1
chr13	30844000	chr20	28557000	merge.BND.1820	.	.	0
chr13	30844000	chr2	226716000	merge.BND.1821	.	.	0
chr13	38957000	chr6	77590000	merge.BND.1822	.	.	1
chr13	84345000	chr16	66838000	merge.BND.1823	ENSG00000288016	NAE1	0
chr14	102678000	chr6	36946000	merge.BND.1824	RCOR1	.	0
chr14	104232000	chr8	142257000	merge.BND.1825	LINC02691	TSNARE1	0
chr14	104891000	chr22	43980000	merge.BND.1826	CEP170B	SAMM50	0
chr14	105959000	chr2	150662000	merge.BND.1827	.	.	1
chr14	16097000	chr8	43242000	merge.BND.1828	.	.	1
chr14	16141000	chr20	28780000	merge.BND.1829	.	.	0
chr14	30562000	chr6	32668000	merge.BND.1830	G2E3-AS1	HLA-DQB1	0
chr14	44417000	chr3	164220000	merge.BND.1831	.	.	0
chr14	59749000	chrX	110690000	merge.BND.1832	RTN1	CHRDL1	1
chr14	59751000	chrX	122742000	merge.BND.1833	RTN1	.	1
chr14	76189000	chr18	50410000	merge.BND.1834	GPATCH2L	.	0
chr14	80488000	chr8	6091000	merge.BND.1835	CEP128	ENSG00000253880	0
chr14	81320000	chr4	108411000	merge.BND.1836	STON2	.	0
chr15	17084000	chr17	26936000	merge.BND.1837	.	.	0
chr15	17084000	chr20	28890000	merge.BND.1838	.	.	0
chr15	20340000	chr16	32285000	merge.BND.1839	.	.	0
chr15	20340000	chr2	87400000	merge.BND.1840	.	.	0
chr15	20340000	chr2	87431000	merge.BND.1841	.	.	0
chr15	21113000	chr2	87431000	merge.BND.1842	.	.	0
chr15	23676000	chr4	26244000	merge.BND.1843	.	RBPJ	0
chr15	29949000	chr9	401000	merge.BND.1844	TJP1	DOCK8	0
chr15	35255000	chr9	86587000	merge.BND.1845	DPH6	.	0
chr15	40562000	chr6	116452000	merge.BND.1846	CCDC32	ENSG00000285446	0
chr15	45667000	chr7	107727000	merge.BND.1847	ENSG00000260170	.	0
chr15	63082000	chr5	75606000	merge.BND.1848	.	POLK	0
chr15	64577000	chr4	31204000	merge.BND.1849	ZNF609	LINC02497	0
chr15	82501000	chr8	62212000	merge.BND.1850	ENSG00000290948	ENSG00000285971	0
chr15	85812000	chr5	163060000	merge.BND.1851	.	ENSG00000254186	0
chr16	10000	chr18	11000	merge.BND.1852	.	.	0
chr16	10653000	chr2	3296000	merge.BND.1853	TEKT5	EIPR1	0
chr16	20000	chr21	46135000	merge.BND.1854	ENSG00000260803	.	1
chr16	23982000	chr7	72114000	merge.BND.1855	PRKCB	CALN1	0
chr16	28090000	chr21	44984000	merge.BND.1856	.	.	0
chr16	34063000	chrY	56844000	merge.BND.1857	.	.	1
chr16	34064000	chrY	10911000	merge.BND.1858	.	.	0
chr16	34077000	chr7	65490000	merge.BND.1859	.	.	0
chr16	34097000	chr20	28890000	merge.BND.1860	.	.	0
chr16	34100000	chr21	7262000	merge.BND.1861	.	.	0
chr16	53011000	chr6	122036000	merge.BND.1862	MTCH2P4	.	0
chr16	74811000	chr7	23636000	merge.BND.1863	.	CCDC126	0
chr16	8592000	chr8	142935000	merge.BND.1864	.	.	0
chr16	89046000	chr2	231005000	merge.BND.1865	.	SPATA3	0
chr16	89069000	chr19	8897000	merge.BND.1866	.	MUC16	0
chr16	89069000	chr8	142935000	merge.BND.1867	.	.	0
chr16	89070000	chr17	81531000	merge.BND.1868	.	FSCN2	0
chr16	915000	chrX	6533000	merge.BND.1869	LMF1	.	0
chr17	118000	chr9	138234000	merge.BND.1870	ENSG00000280136	ENSG00000290585	0
chr17	12351000	chr19	20919000	merge.BND.1871	.	.	0
chr17	12351000	chr6	82935000	merge.BND.1872	.	UBE3D	0
chr17	17460000	chr8	142257000	merge.BND.1873	.	TSNARE1	0
chr17	19951000	chr6	31330000	merge.BND.1874	AKAP10	.	0
chr17	22159000	chr21	7948000	merge.BND.1875	UBBP4	.	0
chr17	30071000	chr6	86000000	merge.BND.1876	EFCAB5	.	0
chr17	33737000	chr19	29902000	merge.BND.1877	ASIC2	.	1
chr17	56793000	chr8	142256000	merge.BND.1878	C17orf67	TSNARE1	0
chr17	6194000	chr22	43495000	merge.BND.1879	.	MPPED1	1
chr17	65489000	chr9	133564000	merge.BND.1880	.	ADAMTSL2	0
chr17	6562000	chr19	50493000	merge.BND.1881	.	ENSG00000289950	0
chr17	80313000	chr9	134715000	merge.BND.1882	RNF213	COL5A1	0
chr17	80498000	chr8	141348000	merge.BND.1883	.	.	1
chr17	81531000	chr21	43336000	merge.BND.1884	FSCN2	.	1
chr17	81532000	chr19	55266000	merge.BND.1885	FSCN2	HSPBP1	0
chr17	81532000	chr7	131681000	merge.BND.1886	FSCN2	.	0
chr17	81533000	chr20	62382000	merge.BND.1887	FSCN2	.	0
chr18	108000	chrY	11334000	merge.BND.1888	.	.	0
chr18	110000	chr3	75669000	merge.BND.1889	ROCK1P1	RPL23AP49	0
chr18	112000	chrY	11333000	merge.BND.1890	ROCK1P1	DUX4L19	0
chr18	24823000	chr21	8245000	merge.BND.1891	ENSG00000266573	.	0
chr18	45000	chr20	29369000	merge.BND.1892	.	.	0
chr18	49441000	chr4	49709000	merge.BND.1893	DYM	.	0
chr18	50345000	chr4	57260000	merge.BND.1894	.	.	0
chr18	59404000	chr8	133960000	merge.BND.1895	.	.	1
chr18	653000	chr5	180406000	merge.BND.1896	TYMSOS	.	0
chr18	77258000	chr22	20162000	merge.BND.1897	GALR1	.	0
chr18	79543000	chr19	444000	merge.BND.1898	.	SHC2	0
chr18	80258000	chr20	64288000	merge.BND.1899	.	PCMTD2	0
chr19	18442000	chr2	241897000	merge.BND.1900	ENSG00000268199	LINC01237	0
chr19	24083000	chr5	25574000	merge.BND.1901	ZNF254	.	0
chr19	27373000	chrX	62588000	merge.BND.1902	.	.	0
chr19	27399000	chr3	93716000	merge.BND.1903	.	.	1
chr19	33754000	chr22	38189000	merge.BND.1904	CHST8	PLA2G6	0
chr19	36233000	chr9	129443000	merge.BND.1905	ZNF146	ENSG00000230676	0
chr19	442000	chr4	8295000	merge.BND.1906	SHC2	HTRA3	1
chr19	443000	chr4	8295000	merge.BND.1907	SHC2	HTRA3	0
chr19	44546000	chr6	13191000	merge.BND.1908	CEACAM22P	PHACTR1	0
chr19	4703000	chr4	180824000	merge.BND.1909	DPP9	.	0
chr19	48044000	chr20	63444000	merge.BND.1910	CABP5	KCNQ2	0
chr19	48669000	chr8	141780000	merge.BND.1911	SEC1P	.	0
chr19	48669000	chr8	142257000	merge.BND.1912	SEC1P	TSNARE1	0
chr19	48670000	chr2	10399000	merge.BND.1913	SEC1P	HPCAL1	0
chr19	50493000	chr7	132563000	merge.BND.1914	ENSG00000289950	PLXNA4	0
chr19	55266000	chr21	43337000	merge.BND.1915	HSPBP1	.	0
chr1	103231000	chr10	84794000	merge.BND.1916	.	.	0
chr1	104844000	chr5	68968000	merge.BND.1917	.	ENSG00000249335	0
chr1	110120000	chr22	20164000	merge.BND.1918	.	.	0
chr1	118859000	chr2	141095000	merge.BND.1919	.	LRP1B	0
chr1	144101000	chr2	90288000	merge.BND.1920	.	.	0
chr1	148138000	chr9	129443000	merge.BND.1921	NBPF11	ENSG00000230676	0
chr1	154714000	chr22	50341000	merge.BND.1922	KCNN3	.	0
chr1	166495000	chr6	96983000	merge.BND.1923	.	KLHL32	0
chr1	168410000	chr4	153130000	merge.BND.1924	ENSG00000228697	.	0
chr1	168472000	chr13	45425000	merge.BND.1925	ENSG00000228697	.	0
chr1	168472000	chr4	35202000	merge.BND.1926	ENSG00000228697	.	0
chr1	168472000	chr4	35204000	merge.BND.1927	ENSG00000228697	.	0
chr1	172695000	chr3	98690000	merge.BND.1928	.	.	1
chr1	173382000	chr6	32538000	merge.BND.1929	.	.	1
chr1	223081000	chr10	132821000	merge.BND.1930	.	CFAP46	0
chr1	2325000	chr5	167428000	merge.BND.1931	MORN1	TENM2	1
chr1	234109000	chr6	148739000	merge.BND.1932	SLC35F3	.	0
chr1	244937000	chr22	23503000	merge.BND.1933	.	.	0
chr1	246325000	chr16	57691000	merge.BND.1934	SMYD3	ENSG00000260467	0
chr1	247363000	chr19	48761000	merge.BND.1935	ENSG00000289728	.	0
chr1	248946000	chr20	64288000	merge.BND.1936	.	PCMTD2	0
chr1	27277000	chrX	74822000	merge.BND.1937	WDTC1	NEXMIF	0
chr1	29552000	chr8	142256000	merge.BND.1938	.	TSNARE1	0
chr1	29554000	chr21	43338000	merge.BND.1939	.	.	0
chr1	30732000	chr14	64766000	merge.BND.1940	ENSG00000287510	SPTB	0
chr1	33010000	chr2	180274000	merge.BND.1941	AK2	.	0
chr1	37446000	chr12	127569000	merge.BND.1942	ZC3H12A-DT	ENSG00000287622	0
chr1	4145000	chr15	45462000	merge.BND.1943	.	SLC30A4-AS1	0
chr1	45330000	chr2	203987000	merge.BND.1944	ENSG00000288208	.	0
chr1	4647000	chr6	35169000	merge.BND.1945	.	.	1
chr1	55003000	chrX	2521000	merge.BND.1946	BSND	.	0
chr1	55003000	chrY	2521000	merge.BND.1947	BSND	.	0
chr1	5534000	chr5	107978000	merge.BND.1948	.	FBXL17	0
chr1	75383000	chr12	55333000	merge.BND.1949	SLC44A5	.	0
chr1	8277000	chr7	154574000	merge.BND.1950	.	DPP6	1
chr1	86679000	chr6	147842000	merge.BND.1951	CLCA4-AS1	ENSG00000227681	1
chr1	86797000	chr10	108087000	merge.BND.1952	.	LINC01435	0
chr20	25544000	chr4	76490000	merge.BND.1953	NINL	SHROOM3	0
chr20	28557000	chr21	45636000	merge.BND.1954	.	.	0
chr20	29685000	chr5	49661000	merge.BND.1955	.	.	0
chr20	31157000	chr5	49656000	merge.BND.1956	.	.	0
chr20	36314000	chr22	50339000	merge.BND.1957	DLGAP4	.	0
chr20	56284000	chr4	60875000	merge.BND.1958	.	.	0
chr20	58197000	chr8	142937000	merge.BND.1959	.	.	0
chr20	61823000	chr4	153129000	merge.BND.1960	CDH4	.	0
chr20	63049000	chr7	132564000	merge.BND.1961	LINC01056	PLXNA4	0
chr20	63102000	chrX	25816000	merge.BND.1962	HAR1B	.	0
chr20	64287000	chrX	156020000	merge.BND.1963	PCMTD2	ENSG00000270726	0
chr20	64288000	chrY	57216000	merge.BND.1964	PCMTD2	.	0
chr21	10360000	chr22	18388000	merge.BND.1965	.	FAM230J	0
chr21	32441000	chr3	75414000	merge.BND.1966	EVA1C	FAM86DP	0
chr21	43336000	chr6	160457000	merge.BND.1967	.	LPAL2	0
chr21	43336000	chr8	142432000	merge.BND.1968	.	.	0
chr21	44420000	chr3	45079000	merge.BND.1969	TRPM2	.	0
chr21	46135000	chr3	11000	merge.BND.1970	.	.	0
chr21	46135000	chr4	190122000	merge.BND.1971	.	.	0
chr21	5244000	chr22	12310000	merge.BND.1972	.	.	0
chr21	5247000	chr9	40939000	merge.BND.1973	.	.	0
chr21	7262000	chrY	10866000	merge.BND.1974	.	.	0
chr21	8757000	chr4	49627000	merge.BND.1975	.	.	1
chr22	11215000	chr8	43239000	merge.BND.1976	.	.	1
chr22	20162000	chr5	35709000	merge.BND.1977	.	SPEF2	1
chr22	40170000	chr3	194421000	merge.BND.1978	TNRC6B	ATP13A3	0
chr22	43497000	chr6	167591000	merge.BND.1979	MPPED1	.	1
chr22	50242000	chr6	32668000	merge.BND.1980	TUBGCP6	HLA-DQB1	0
chr2	115938000	chrX	4488000	merge.BND.1981	ENSG00000287451	.	1
chr2	125767000	chr8	16674000	merge.BND.1982	.	ENSG00000253496	0
chr2	139500000	chr7	136499000	merge.BND.1983	.	.	0
chr2	155671000	chr4	21159000	merge.BND.1984	.	KCNIP4	1
chr2	161279000	chr21	8812000	merge.BND.1985	PSMD14-DT	ENSG00000286033	0
chr2	161279000	chr22	12179000	merge.BND.1986	PSMD14-DT	.	0
chr2	169465000	chrX	144476000	merge.BND.1987	.	.	1
chr2	193218000	chr6	13503000	merge.BND.1988	.	.	0
chr2	218083000	chr22	45980000	merge.BND.1989	RUFY4	.	0
chr2	228265000	chr9	31620000	merge.BND.1990	.	.	0
chr2	231006000	chr8	142935000	merge.BND.1991	SPATA3	.	0
chr2	238485000	chr9	63824000	merge.BND.1992	.	.	0
chr2	239866000	chr6	39846000	merge.BND.1993	.	DAAM2	0
chr2	240782000	chr5	346000	merge.BND.1994	KIF1A	AHRR	0
chr2	41824000	chr3	89461000	merge.BND.1995	.	EPHA3	0
chr2	71769000	chrX	151073000	merge.BND.1996	.	.	0
chr2	7488000	chr4	18613000	merge.BND.1997	.	ENSG00000286046	1
chr2	89841000	chr5	49662000	merge.BND.1998	.	.	1
[truncated: 3,180 more rows]
