# Supplementary material for: Parallel profiling of genome mutations and multiple chromatin modalities in single cells by scNanoCT&amp;ATAC-seq
Source: Research Square preprint supplement (doi:10.21203/rs.3.rs-8125184/v1), 2026-01-13
Supplement: Supplementary file 3 [file e0f9368e181443caa7c09b8a.xlsx]

## Sheet: Sheet1
Table S10. Summary of the signal changes of ATAC peaks and the copy number changes within corresponding chromosome bins between tumor_1 and normal cells.
Chrom	Start	End	FDR	p-value	ATAC PeakID	T1 vs N ATAC (FCpeak)	CNV BinID	T1 vs N CNV (CNVpeak)	Gene overlapping with ATAC peak	FCpeak - CNVpeak	Trend	Crosstalk mode
chr8	127891799	127892246	2.1762e-10	1.2908e-13	mergeATAC_peak60905	168.53	chr8:127	3.79706	PVT1	164.733	ATAC > CNV	De novo increase
chr1	150770807	150771240	2.55627e-07	4.0822e-10	mergeATAC_peak3629	144.569	chr1:150	2.6685	.	141.901	ATAC > CNV	De novo increase
chr8	118862239	118862635	8.8738e-08	1.21465e-10	mergeATAC_peak60535	141.879	chr8:118	2.10518	.	139.773	ATAC > CNV	De novo increase
chr8	134797510	134797692	1.87156e-08	1.93558e-11	mergeATAC_peak61148	145.351	chr8:134	6.53886	ENSG00000289405	138.812	ATAC > CNV	De novo increase
chr8	126433585	126434162	2.03253e-06	4.48231e-09	mergeATAC_peak60836	117.439	chr8:126	3.59075	.	113.848	ATAC > CNV	De novo increase
chr20	53921465	53921976	7.26443e-07	1.35895e-09	mergeATAC_peak37080	112.543	chr20:53	1.54604	.	110.997	ATAC > CNV	De novo increase
chr20	54180005	54180441	6.84667e-05	2.72821e-07	mergeATAC_peak37095	109.699	chr20:54	1.05804	.	108.641	ATAC > CNV	De novo increase
chr8	115127909	115128148	6.84667e-05	2.72821e-07	mergeATAC_peak60425	112.135	chr8:115	4.57805	.	107.557	ATAC > CNV	De novo increase
chr8	119990695	119991043	4.12977e-05	1.52626e-07	mergeATAC_peak60576	108.368	chr8:119	2.50998	.	105.858	ATAC > CNV	De novo increase
chr1	110677573	110677924	4.12977e-05	1.52625e-07	mergeATAC_peak2952	106.422	chr1:110	1.92785	.	104.494	ATAC > CNV	De novo increase
chr8	100891560	100891853	5.50516e-06	1.46523e-08	mergeATAC_peak59999	112.014	chr8:100	7.66417	.	104.35	ATAC > CNV	De novo increase
chr21	33078947	33079333	4.12977e-05	1.52626e-07	mergeATAC_peak37754	105.795	chr21:33	1.50131	.	104.293	ATAC > CNV	De novo increase
chr9	96868783	96869088	1.52303e-05	4.74854e-08	mergeATAC_peak63196	104.929	chr9:96	1.6157	.	103.314	ATAC > CNV	De novo increase
chr8	142769759	142770037	9.28438e-06	2.64054e-08	mergeATAC_peak61428	100.306	chr8:142	3.20182	SLURP2	97.1042	ATAC > CNV	De novo increase
chr5	140369452	140369793	1.52303e-05	4.74854e-08	mergeATAC_peak48614	98.4743	chr5:140	1.65126	.	96.823	ATAC > CNV	De novo increase
chr17	52149008	52149434	6.84667e-05	2.72821e-07	mergeATAC_peak26042	97.9165	chr17:52	1.24798	.	96.6685	ATAC > CNV	De novo increase
chr8	127796009	127796206	0.000108122	4.86748e-07	mergeATAC_peak60893	93.644	chr8:127	3.79706	PVT1;MIR1204	89.847	ATAC > CNV	De novo increase
chr8	133572489	133572713	1.52303e-05	4.74854e-08	mergeATAC_peak61098	94.2871	chr8:133	6.19438	ST3GAL1;ST3GAL1-DT;ENSG00000289050	88.0927	ATAC > CNV	De novo increase
chr1	150650162	150650556	0.00108639	8.57533e-06	mergeATAC_peak3620	90.5868	chr1:150	2.6685	.	87.9183	ATAC > CNV	De novo increase
chr17	41972893	41973291	9.28438e-06	2.64052e-08	mergeATAC_peak25435	86.4326	chr17:41	1.49656	.	84.9361	ATAC > CNV	De novo increase
chr5	263608	263918	0.000168625	8.66837e-07	mergeATAC_peak46276	84.6896	chr5:0	1.30227	.	83.3873	ATAC > CNV	De novo increase
chr8	101588400	101588585	0.000435423	2.73499e-06	mergeATAC_peak60050	88.1739	chr8:101	5.18747	.	82.9865	ATAC > CNV	De novo increase
chr21	33075167	33075484	0.000168625	8.66837e-07	mergeATAC_peak37753	84.4067	chr21:33	1.50131	.	82.9054	ATAC > CNV	De novo increase
chr9	116860587	116860799	0.000691235	4.84643e-06	mergeATAC_peak63744	83.9445	chr9:116	1.38111	.	82.5634	ATAC > CNV	De novo increase
chr16	24005373	24005672	0.000168625	8.66837e-07	mergeATAC_peak22262	82.3722	chr16:24	1.22966	.	81.1426	ATAC > CNV	De novo increase
chr5	178078232	178078528	0.000270198	1.54103e-06	mergeATAC_peak49668	83.8479	chr5:178	3.15196	.	80.6959	ATAC > CNV	De novo increase
chr9	92151745	92152363	0.000108122	4.86748e-07	mergeATAC_peak63003	81.6273	chr9:92	1.06451	ENSG00000290644	80.5628	ATAC > CNV	De novo increase
chr8	138588204	138588799	8.59788e-12	2.90306e-15	mergeATAC_peak61242	85.4769	chr8:138	5.52961	.	79.9473	ATAC > CNV	De novo increase
chr9	122197441	122197819	0.000270198	1.54103e-06	mergeATAC_peak63881	80.7914	chr9:122	1.8175	.	78.9739	ATAC > CNV	De novo increase
chr20	46695873	46696349	1.52303e-05	4.74854e-08	mergeATAC_peak36797	79.9047	chr20:46	1.14779	.	78.7569	ATAC > CNV	De novo increase
chr9	76531300	76531728	0.00168011	1.51527e-05	mergeATAC_peak62634	76.9114	chr9:76	1.34564	.	75.5657	ATAC > CNV	De novo increase
chr8	142825988	142826194	0.000168625	8.66837e-07	mergeATAC_peak61433	75.457	chr8:142	3.20182	.	72.2551	ATAC > CNV	De novo increase
chr8	100807151	100807445	0.00168011	1.51527e-05	mergeATAC_peak59992	79.9082	chr8:100	7.66417	.	72.244	ATAC > CNV	De novo increase
chr8	100856585	100856859	0.00108639	8.57533e-06	mergeATAC_peak59997	78.4735	chr8:100	7.66417	.	70.8094	ATAC > CNV	De novo increase
chr8	133320454	133320874	0.00251193	2.67426e-05	mergeATAC_peak61068	76.283	chr8:133	6.19438	.	70.0886	ATAC > CNV	De novo increase
chr11	134398092	134398450	0.00251193	2.67426e-05	mergeATAC_peak12627	70.8988	chr11:134	1.02896	.	69.8699	ATAC > CNV	De novo increase
chr8	100733250	100733821	5.17305e-14	7.08087e-18	mergeATAC_peak59989	77.363	chr8:100	7.66417	.	69.6988	ATAC > CNV	De novo increase
chr6	143998315	143998677	0.00251193	2.67426e-05	mergeATAC_peak53615	69.896	chr6:143	1.25562	.	68.6403	ATAC > CNV	De novo increase
chr8	119987514	119987967	0.00377586	4.71472e-05	mergeATAC_peak60575	70.9677	chr8:119	2.50998	.	68.4577	ATAC > CNV	De novo increase
chr1	161566246	161566454	0.000691235	4.84646e-06	mergeATAC_peak4282	70.6174	chr1:161	2.73056	.	67.8868	ATAC > CNV	De novo increase
chr6	149834607	149834840	0.00168011	1.51527e-05	mergeATAC_peak53766	68.4382	chr6:149	1.37156	.	67.0667	ATAC > CNV	De novo increase
chr8	99859868	99860082	0.000691235	4.84646e-06	mergeATAC_peak59920	70.1212	chr8:99	3.19132	.	66.9298	ATAC > CNV	De novo increase
chr17	8388307	8388521	0.00108639	8.57533e-06	mergeATAC_peak24374	68.3356	chr17:8	1.63259	.	66.703	ATAC > CNV	De novo increase
chr8	136150881	136151199	0.000691235	4.84646e-06	mergeATAC_peak61193	71.6953	chr8:136	5.87389	.	65.8214	ATAC > CNV	De novo increase
chr8	127766684	127767014	0.000435423	2.73501e-06	mergeATAC_peak60890	69.1935	chr8:127	3.79706	.	65.3964	ATAC > CNV	De novo increase
chr20	50658885	50659242	0.000691235	4.84643e-06	mergeATAC_peak36977	67.0504	chr20:50	2.42544	.	64.625	ATAC > CNV	De novo increase
chr1	111892283	111892766	0.00168011	1.51527e-05	mergeATAC_peak3006	66.2629	chr1:111	1.6994	.	64.5635	ATAC > CNV	De novo increase
chr6	106804369	106804813	0.000435423	2.73501e-06	mergeATAC_peak52743	66.2212	chr6:106	1.70797	.	64.5132	ATAC > CNV	De novo increase
chr21	36198944	36199186	0.0120998	0.000257232	mergeATAC_peak37865	65.4058	chr21:36	1.46781	.	63.938	ATAC > CNV	De novo increase
chr8	143353859	143354107	0.00168011	1.51527e-05	mergeATAC_peak61468	67.0924	chr8:143	3.23947	.	63.853	ATAC > CNV	De novo increase
chr5	178249694	178249950	0.00377586	4.71472e-05	mergeATAC_peak49690	66.8165	chr5:178	3.15196	.	63.6646	ATAC > CNV	De novo increase
chr8	100457646	100457866	0.00251193	2.67426e-05	mergeATAC_peak59961	71.3107	chr8:100	7.66417	.	63.6465	ATAC > CNV	De novo increase
chr17	35057603	35057983	0.00168011	1.51527e-05	mergeATAC_peak25070	64.6161	chr17:35	1.22974	.	63.3864	ATAC > CNV	De novo increase
chr1	151733258	151733479	0.00108639	8.57533e-06	mergeATAC_peak3711	65.6932	chr1:151	2.96475	.	62.7284	ATAC > CNV	De novo increase
chr6	26322690	26323087	0.00108639	8.57533e-06	mergeATAC_peak50627	64.3011	chr6:26	1.59517	H3C9P	62.7059	ATAC > CNV	De novo increase
chr19	57656338	57656709	0.00251193	2.67426e-05	mergeATAC_peak31083	64.257	chr19:57	1.67364	.	62.5834	ATAC > CNV	De novo increase
chr16	50719076	50719245	0.00168011	1.51527e-05	mergeATAC_peak22742	63.8685	chr16:50	1.56238	.	62.3061	ATAC > CNV	De novo increase
chr19	37334513	37334764	0.0120998	0.000257232	mergeATAC_peak30053	63.8989	chr19:37	1.63227	ZNF875	62.2666	ATAC > CNV	De novo increase
chr1	110677098	110677306	0.000435423	2.73501e-06	mergeATAC_peak2951	63.9106	chr1:110	1.92785	.	61.9827	ATAC > CNV	De novo increase
chr4	11604297	11604720	0.00108639	8.57533e-06	mergeATAC_peak43724	63.0338	chr4:11	1.07483	.	61.9589	ATAC > CNV	De novo increase
chr10	113557409	113557712	0.00558331	8.30479e-05	mergeATAC_peak9036	62.907	chr10:113	1.03019	.	61.8768	ATAC > CNV	De novo increase
chr16	57508163	57508408	0.00377586	4.71472e-05	mergeATAC_peak22979	63.6806	chr16:57	1.94669	.	61.7339	ATAC > CNV	De novo increase
chr17	81846669	81846976	0.00168011	1.51527e-05	mergeATAC_peak27222	63.7874	chr17:81	2.11727	P4HB	61.6701	ATAC > CNV	De novo increase
chr8	139277284	139277560	0.00251193	2.67426e-05	mergeATAC_peak61266	64.9441	chr8:139	3.67788	.	61.2662	ATAC > CNV	De novo increase
chr5	169641351	169641744	0.00168011	1.51527e-05	mergeATAC_peak49381	63.8101	chr5:169	2.56038	.	61.2497	ATAC > CNV	De novo increase
chr7	128579956	128580200	0.0120998	0.000257232	mergeATAC_peak57463	62.0234	chr7:128	1.31971	.	60.7037	ATAC > CNV	De novo increase
chr6	33123779	33124022	0.00251193	2.67424e-05	mergeATAC_peak51077	62.2981	chr6:33	1.70976	.	60.5883	ATAC > CNV	De novo increase
chr20	53725265	53725666	0.00251193	2.67426e-05	mergeATAC_peak37055	62.1098	chr20:53	1.54604	.	60.5637	ATAC > CNV	De novo increase
chr5	36502682	36503040	0.00168011	1.51527e-05	mergeATAC_peak46854	61.5835	chr5:36	1.22985	.	60.3536	ATAC > CNV	De novo increase
chr17	6643807	6644159	0.00168011	1.51527e-05	mergeATAC_peak24196	61.2153	chr17:6	1.03181	.	60.1835	ATAC > CNV	De novo increase
chr17	76085615	76085890	0.0344199	0.00140291	mergeATAC_peak26862	61.3392	chr17:76	1.34067	EXOC7	59.9985	ATAC > CNV	De novo increase
chr5	39100823	39101338	0.00168011	1.51527e-05	mergeATAC_peak46926	60.5156	chr5:39	1.19353	.	59.3221	ATAC > CNV	De novo increase
chr12	59070585	59070906	0.008272	0.000146189	mergeATAC_peak14132	59.9375	chr12:59	1.0659	.	58.8716	ATAC > CNV	De novo increase
chr1	207620381	207620621	0.0120998	0.000257232	mergeATAC_peak5600	59.7417	chr1:207	1.85521	.	57.8865	ATAC > CNV	De novo increase
chr8	137890963	137891192	3.07344e-07	5.14181e-10	mergeATAC_peak61221	63.0667	chr8:137	5.43939	.	57.6274	ATAC > CNV	De novo increase
chr21	32433305	32433763	0.00108639	8.57533e-06	mergeATAC_peak37723	58.8592	chr21:32	1.57276	.	57.2864	ATAC > CNV	De novo increase
chr5	56097608	56097916	0.00558331	8.30479e-05	mergeATAC_peak47200	58.3534	chr5:56	1.12822	.	57.2252	ATAC > CNV	De novo increase
chr8	115380742	115381022	0.00251193	2.67426e-05	mergeATAC_peak60430	61.4394	chr8:115	4.57805	.	56.8613	ATAC > CNV	De novo increase
chr17	56939990	56940210	0.00251193	2.67426e-05	mergeATAC_peak26120	57.9702	chr17:56	1.20061	ENSG00000262298	56.7696	ATAC > CNV	De novo increase
chr8	101735522	101735935	0.00377586	4.71472e-05	mergeATAC_peak60064	61.8999	chr8:101	5.18747	.	56.7125	ATAC > CNV	De novo increase
chr8	133719797	133720175	0.00558331	8.30479e-05	mergeATAC_peak61102	62.8682	chr8:133	6.19438	.	56.6738	ATAC > CNV	De novo increase
chr7	103151276	103151588	0.00251193	2.67426e-05	mergeATAC_peak56959	58.0075	chr7:103	1.39479	RPL23AP95	56.6127	ATAC > CNV	De novo increase
chr8	121212159	121212479	0.0244133	0.000796517	mergeATAC_peak60614	57.5662	chr8:121	1.30166	.	56.2645	ATAC > CNV	De novo increase
chr1	224770395	224770642	0.00251193	2.67426e-05	mergeATAC_peak6103	57.5722	chr1:224	1.41159	.	56.1606	ATAC > CNV	De novo increase
chr7	138545190	138545648	0.00558331	8.30479e-05	mergeATAC_peak57682	57.6816	chr7:138	1.53345	.	56.1481	ATAC > CNV	De novo increase
chr9	76139356	76139602	0.008272	0.000146189	mergeATAC_peak62611	57.3969	chr9:76	1.34564	.	56.0512	ATAC > CNV	De novo increase
chr20	53652449	53652682	0.0172708	0.000452581	mergeATAC_peak37050	57.4384	chr20:53	1.54604	.	55.8924	ATAC > CNV	De novo increase
chr9	32701619	32701955	0.0120998	0.000257232	mergeATAC_peak62065	56.9277	chr9:32	1.31305	.	55.6147	ATAC > CNV	De novo increase
chr5	1161968	1162265	0.00168011	1.51527e-05	mergeATAC_peak46316	56.6504	chr5:1	1.64135	.	55.0091	ATAC > CNV	De novo increase
chr21	41366644	41366910	0.00377586	4.71472e-05	mergeATAC_peak38059	56.6224	chr21:41	1.72584	.	54.8966	ATAC > CNV	De novo increase
chr8	97766576	97766754	0.00168011	1.51527e-05	mergeATAC_peak59844	57.3197	chr8:97	2.43075	.	54.889	ATAC > CNV	De novo increase
chr7	73636305	73636633	0.00251193	2.67426e-05	mergeATAC_peak56059	56.0408	chr7:73	1.19393	.	54.8469	ATAC > CNV	De novo increase
chr8	144369590	144369863	0.00251193	2.67424e-05	mergeATAC_peak61570	57.6942	chr8:144	2.8808	.	54.8134	ATAC > CNV	De novo increase
chr8	121324936	121325339	0.0120998	0.000257232	mergeATAC_peak60617	55.997	chr8:121	1.30166	.	54.6953	ATAC > CNV	De novo increase
chr5	62752782	62753043	0.00251193	2.67426e-05	mergeATAC_peak47320	55.6286	chr5:62	1.24526	.	54.3834	ATAC > CNV	De novo increase
chr6	106736578	106736825	0.0244133	0.000796517	mergeATAC_peak52728	56.0015	chr6:106	1.70797	.	54.2936	ATAC > CNV	De novo increase
chr3	3038702	3039013	0.00251193	2.67426e-05	mergeATAC_peak39649	55.325	chr3:3	1.2338	CNTN4	54.0912	ATAC > CNV	De novo increase
chr9	130187259	130187495	0.00558331	8.30479e-05	mergeATAC_peak64261	55.07	chr9:130	1.03156	.	54.0384	ATAC > CNV	De novo increase
chr9	92999367	92999613	0.00377586	4.71472e-05	mergeATAC_peak63017	54.8068	chr9:92	1.06451	.	53.7423	ATAC > CNV	De novo increase
chr7	158992190	158992468	0.0244133	0.000796517	mergeATAC_peak58224	55.0851	chr7:158	1.4513	.	53.6338	ATAC > CNV	De novo increase
chr20	41650345	41650861	0.00251193	2.67426e-05	mergeATAC_peak36645	54.9508	chr20:41	1.36378	.	53.587	ATAC > CNV	De novo increase
chr7	158111310	158111666	0.00251193	2.67426e-05	mergeATAC_peak58185	54.8753	chr7:158	1.4513	.	53.424	ATAC > CNV	De novo increase
chr1	211407811	211408088	0.00558331	8.30474e-05	mergeATAC_peak5723	54.7275	chr1:211	1.36445	.	53.3631	ATAC > CNV	De novo increase
chr17	28282652	28282950	0.00377586	4.71472e-05	mergeATAC_peak24877	54.1105	chr17:28	1.77546	.	52.335	ATAC > CNV	De novo increase
chr20	50434714	50435168	0.00377586	4.71472e-05	mergeATAC_peak36953	54.7031	chr20:50	2.42544	.	52.2776	ATAC > CNV	De novo increase
chr5	166807194	166807531	0.008272	0.000146189	mergeATAC_peak49320	54.5208	chr5:166	2.37631	.	52.1445	ATAC > CNV	De novo increase
chr7	141558516	141558891	0.0172708	0.000452581	mergeATAC_peak57780	53.3583	chr7:141	1.29339	.	52.0649	ATAC > CNV	De novo increase
chr6	28658182	28658371	0.008272	0.000146189	mergeATAC_peak50736	53.4315	chr6:28	1.65318	.	51.7784	ATAC > CNV	De novo increase
chr5	56534146	56534348	0.0470618	0.00247438	mergeATAC_peak47220	52.7838	chr5:56	1.12822	C5orf67	51.6555	ATAC > CNV	De novo increase
chr1	164683369	164683696	0.0120998	0.000257232	mergeATAC_peak4357	53.6294	chr1:164	2.05365	.	51.5757	ATAC > CNV	De novo increase
chr7	131187331	131187776	0.00251193	2.67426e-05	mergeATAC_peak57559	52.8363	chr7:131	1.27409	.	51.5622	ATAC > CNV	De novo increase
chr20	46349052	46349249	0.0244133	0.000796517	mergeATAC_peak36783	52.5742	chr20:46	1.14779	.	51.4264	ATAC > CNV	De novo increase
chr20	53570666	53570934	0.00377586	4.71472e-05	mergeATAC_peak37038	52.8767	chr20:53	1.54604	.	51.3307	ATAC > CNV	De novo increase
chr16	15287584	15287837	0.0244133	0.000796517	mergeATAC_peak22013	52.3591	chr16:15	1.07678	.	51.2823	ATAC > CNV	De novo increase
chr21	38256778	38256990	0.00377586	4.71472e-05	mergeATAC_peak37948	53.0906	chr21:38	1.91717	KCNJ15	51.1734	ATAC > CNV	De novo increase
chr9	134076259	134076496	0.0172708	0.000452581	mergeATAC_peak64433	52.2588	chr9:134	1.19834	.	51.0605	ATAC > CNV	De novo increase
chr8	135335778	135336024	0.00558331	8.30479e-05	mergeATAC_peak61167	57.6838	chr8:135	6.73882	.	50.945	ATAC > CNV	De novo increase
chr5	169742732	169742972	0.0120998	0.000257232	mergeATAC_peak49382	52.7969	chr5:169	2.56038	.	50.2366	ATAC > CNV	De novo increase
chr9	114848398	114848623	0.0172708	0.000452581	mergeATAC_peak63685	51.6137	chr9:114	1.61734	.	49.9963	ATAC > CNV	De novo increase
chr2	9758754	9759014	0.0172708	0.000452581	mergeATAC_peak31273	51.0623	chr2:9	1.11865	.	49.9436	ATAC > CNV	De novo increase
chr7	25948214	25948464	0.008272	0.000146189	mergeATAC_peak55132	50.7658	chr7:25	1.15577	ENSG00000270933	49.6101	ATAC > CNV	De novo increase
chr7	91195972	91196269	0.0172708	0.000452581	mergeATAC_peak56529	51.1459	chr7:91	1.75136	.	49.3945	ATAC > CNV	De novo increase
chr8	139950834	139951108	0.008272	0.000146189	mergeATAC_peak61287	52.8787	chr8:139	3.67788	.	49.2008	ATAC > CNV	De novo increase
chr8	133833360	133833619	0.0120998	0.000257232	mergeATAC_peak61105	55.1504	chr8:133	6.19438	.	48.956	ATAC > CNV	De novo increase
chr17	336313	336617	0.0172708	0.000452581	mergeATAC_peak23860	50.1277	chr17:0	1.31121	RPH3AL	48.8165	ATAC > CNV	De novo increase
chr7	151717548	151717721	0.00251193	2.67426e-05	mergeATAC_peak58043	50.5685	chr7:151	1.92753	.	48.641	ATAC > CNV	De novo increase
chr8	142669648	142669838	0.00558331	8.30479e-05	mergeATAC_peak61419	51.7784	chr8:142	3.20182	PSCA;JRK	48.5766	ATAC > CNV	De novo increase
chr7	27235401	27235599	0.0470618	0.00247438	mergeATAC_peak55168	49.7122	chr7:27	1.21837	.	48.4938	ATAC > CNV	De novo increase
chr7	50446789	50447013	0.0172708	0.000452581	mergeATAC_peak55728	49.9769	chr7:50	1.5028	.	48.4741	ATAC > CNV	De novo increase
chr21	35249736	35249975	0.0120998	0.000257232	mergeATAC_peak37834	49.412	chr21:35	1.01692	.	48.3951	ATAC > CNV	De novo increase
chr6	169536778	169537301	0.0120998	0.000257232	mergeATAC_peak54348	49.5446	chr6:169	1.165	.	48.3796	ATAC > CNV	De novo increase
chr8	102106781	102106952	0.0120998	0.000257232	mergeATAC_peak60079	52.9683	chr8:102	4.68451	.	48.2837	ATAC > CNV	De novo increase
chr5	266896	267045	0.0172708	0.000452581	mergeATAC_peak46277	49.2599	chr5:0	1.30227	.	47.9577	ATAC > CNV	De novo increase
chr21	32351567	32351798	0.0244133	0.000796517	mergeATAC_peak37710	49.3637	chr21:32	1.57276	.	47.7909	ATAC > CNV	De novo increase
chr8	135228682	135228863	0.00558331	8.30479e-05	mergeATAC_peak61166	54.5147	chr8:135	6.73882	.	47.7759	ATAC > CNV	De novo increase
chr8	98997991	98998149	0.00558331	8.30479e-05	mergeATAC_peak59906	53.1495	chr8:98	5.38308	.	47.7664	ATAC > CNV	De novo increase
chr5	159230743	159230947	0.00558331	8.30479e-05	mergeATAC_peak49168	49.8275	chr5:159	2.06528	ENSG00000252458	47.7623	ATAC > CNV	De novo increase
chr8	42560791	42561021	0.0244133	0.000796517	mergeATAC_peak59095	48.7856	chr8:42	1.04027	.	47.7454	ATAC > CNV	De novo increase
chr19	42431104	42431367	0.00558331	8.30479e-05	mergeATAC_peak30343	49.0418	chr19:42	1.39164	.	47.6502	ATAC > CNV	De novo increase
chr5	170248416	170248730	0.0172708	0.000452581	mergeATAC_peak49396	49.3767	chr5:170	1.87782	.	47.4988	ATAC > CNV	De novo increase
chr5	55773258	55773602	0.0172708	0.000452581	mergeATAC_peak47184	48.5782	chr5:55	1.08918	SLC38A9	47.489	ATAC > CNV	De novo increase
chr6	134217650	134218017	0.0120998	0.000257232	mergeATAC_peak53321	48.9683	chr6:134	1.55713	.	47.4112	ATAC > CNV	De novo increase
chr1	162152626	162152852	0.0244133	0.000796517	mergeATAC_peak4308	49.1261	chr1:162	1.86059	.	47.2655	ATAC > CNV	De novo increase
chr8	133973489	133973734	0.0172708	0.000452581	mergeATAC_peak61115	53.2922	chr8:133	6.19438	.	47.0978	ATAC > CNV	De novo increase
chr5	172678958	172679153	0.00377586	4.71472e-05	mergeATAC_peak49469	49.2739	chr5:172	2.23566	.	47.0383	ATAC > CNV	De novo increase
chr1	162913364	162913684	0.0344199	0.00140291	mergeATAC_peak4339	48.8736	chr1:162	1.86059	.	47.013	ATAC > CNV	De novo increase
chr19	37817174	37817411	0.0172708	0.000452581	mergeATAC_peak30064	48.569	chr19:37	1.63227	ENSG00000291089;ZNF573	46.9368	ATAC > CNV	De novo increase
chr1	214216769	214217162	0.0172708	0.000452581	mergeATAC_peak5828	48.649	chr1:214	1.7131	.	46.9359	ATAC > CNV	De novo increase
chr5	1330608	1330838	0.00558331	8.30479e-05	mergeATAC_peak46324	48.5758	chr5:1	1.64135	.	46.9344	ATAC > CNV	De novo increase
chr8	105089458	105089732	0.0120998	0.000257232	mergeATAC_peak60194	49.8913	chr8:105	3.12791	.	46.7634	ATAC > CNV	De novo increase
chr1	115337621	115337836	0.0172708	0.000452581	mergeATAC_peak3109	47.8842	chr1:115	1.1395	NGF	46.7447	ATAC > CNV	De novo increase
chr8	133398043	133398334	0.00377586	4.71472e-05	mergeATAC_peak61074	52.8771	chr8:133	6.19438	.	46.6827	ATAC > CNV	De novo increase
chr1	211349845	211350015	0.0470618	0.00247438	mergeATAC_peak5720	47.8548	chr1:211	1.36445	.	46.4904	ATAC > CNV	De novo increase
chr17	28661656	28661965	0.0120998	0.000257232	mergeATAC_peak24908	48.2002	chr17:28	1.77546	SDF2;SUPT6H	46.4248	ATAC > CNV	De novo increase
chr1	115314879	115315148	0.0120998	0.000257232	mergeATAC_peak3105	47.5398	chr1:115	1.1395	.	46.4003	ATAC > CNV	De novo increase
chr1	161561363	161561616	0.0172708	0.000452581	mergeATAC_peak4281	48.9982	chr1:161	2.73056	.	46.2677	ATAC > CNV	De novo increase
chr8	118548517	118548734	0.0470618	0.00247438	mergeATAC_peak60527	48.2833	chr8:118	2.10518	.	46.1781	ATAC > CNV	De novo increase
chr11	4626269	4626487	0.0344199	0.00140291	mergeATAC_peak9647	47.0425	chr11:4	1.01268	.	46.0298	ATAC > CNV	De novo increase
chr8	139023185	139023407	0.00168011	1.51527e-05	mergeATAC_peak61261	49.2195	chr8:139	3.67788	.	45.5416	ATAC > CNV	De novo increase
chr17	1083477	1083642	0.0344199	0.00140291	mergeATAC_peak23913	47.0059	chr17:1	1.4726	ABR	45.5333	ATAC > CNV	De novo increase
chr16	14125868	14126022	0.0344199	0.00140291	mergeATAC_peak21962	46.6733	chr16:14	1.50188	.	45.1714	ATAC > CNV	De novo increase
chr17	82445226	82445548	0.0120998	0.000257232	mergeATAC_peak27285	46.6548	chr17:82	1.69737	CYBC1	44.9575	ATAC > CNV	De novo increase
chr17	5075355	5075559	0.0120998	0.000257232	mergeATAC_peak24160	46.1817	chr17:5	1.31842	.	44.8633	ATAC > CNV	De novo increase
chr17	79892577	79892829	0.0120998	0.000257232	mergeATAC_peak27090	46.1432	chr17:79	1.31328	.	44.8299	ATAC > CNV	De novo increase
chr7	151415776	151416164	0.008272	0.000146189	mergeATAC_peak58019	46.7568	chr7:151	1.92753	.	44.8293	ATAC > CNV	De novo increase
chr8	141322485	141322649	0.0172708	0.000452581	mergeATAC_peak61378	48.885	chr8:141	4.07364	.	44.8114	ATAC > CNV	De novo increase
chr17	79728630	79728868	0.0120998	0.000257232	mergeATAC_peak27074	45.956	chr17:79	1.31328	.	44.6428	ATAC > CNV	De novo increase
chr9	115234083	115234499	0.00377586	4.71472e-05	mergeATAC_peak63707	45.8127	chr9:115	1.23114	.	44.5816	ATAC > CNV	De novo increase
chr14	68103894	68104062	0.0470618	0.00247438	mergeATAC_peak18276	46.069	chr14:68	1.60432	.	44.4647	ATAC > CNV	De novo increase
chr8	22756118	22756340	0.0172708	0.000452581	mergeATAC_peak58688	45.4535	chr8:22	1.01803	.	44.4355	ATAC > CNV	De novo increase
chr9	126507389	126507661	0.0120998	0.000257232	mergeATAC_peak64013	45.587	chr9:126	1.21681	.	44.3702	ATAC > CNV	De novo increase
chr7	1513329	1513636	0.0120998	0.000257232	mergeATAC_peak54477	45.4769	chr7:1	1.24522	.	44.2317	ATAC > CNV	De novo increase
chr7	137986503	137986718	0.008272	0.000146189	mergeATAC_peak57665	45.3676	chr7:137	1.24277	.	44.1248	ATAC > CNV	De novo increase
chr17	50697150	50697316	0.0120998	0.000257232	mergeATAC_peak25990	46.4334	chr17:50	2.32619	Y_RNA	44.1072	ATAC > CNV	De novo increase
chr8	127854546	127854727	0.0172708	0.000452581	mergeATAC_peak60900	47.8689	chr8:127	3.79706	PVT1	44.0719	ATAC > CNV	De novo increase
chr1	170826069	170826342	0.0120998	0.000257232	mergeATAC_peak4550	45.3151	chr1:170	1.30154	.	44.0136	ATAC > CNV	De novo increase
chr8	119416893	119417068	0.00558331	8.30479e-05	mergeATAC_peak60557	46.4542	chr8:119	2.50998	CCN3;ENSG00000286282	43.9442	ATAC > CNV	De novo increase
chr1	112556651	112557008	0.0172708	0.000452581	mergeATAC_peak3033	45.3167	chr1:112	1.51252	ST7L	43.8042	ATAC > CNV	De novo increase
chr6	16181220	16181449	0.0120998	0.000257231	mergeATAC_peak50333	44.9135	chr6:16	1.12707	.	43.7865	ATAC > CNV	De novo increase
chr8	138562909	138563164	0.0120998	0.000257232	mergeATAC_peak61235	49.2502	chr8:138	5.52961	.	43.7205	ATAC > CNV	De novo increase
chr5	172414658	172414917	0.0172708	0.000452581	mergeATAC_peak49455	45.8093	chr5:172	2.23566	.	43.5736	ATAC > CNV	De novo increase
chr6	138099822	138100166	0.008272	0.000146189	mergeATAC_peak53461	44.916	chr6:138	1.45257	.	43.4634	ATAC > CNV	De novo increase
chr5	65577	65929	0.0172708	0.000452581	mergeATAC_peak46269	44.7381	chr5:0	1.30227	.	43.4359	ATAC > CNV	De novo increase
chr7	108335387	108335617	0.0244133	0.000796517	mergeATAC_peak57103	44.7132	chr7:108	1.29873	.	43.4145	ATAC > CNV	De novo increase
chr8	108608365	108608778	0.0120998	0.000257232	mergeATAC_peak60290	45.2335	chr8:108	1.89863	.	43.3349	ATAC > CNV	De novo increase
chr4	11468945	11469292	0.0244133	0.000796517	mergeATAC_peak43718	44.352	chr4:11	1.07483	ENSG00000251152	43.2771	ATAC > CNV	De novo increase
chr6	168037938	168038281	0.008272	0.000146189	mergeATAC_peak54292	44.7691	chr6:168	1.5192	.	43.25	ATAC > CNV	De novo increase
chr19	52533742	52534106	0.0172708	0.000452581	mergeATAC_peak30918	44.7265	chr19:52	1.55725	.	43.1692	ATAC > CNV	De novo increase
chr6	40400251	40400521	0.0120998	0.000257232	mergeATAC_peak51390	44.2128	chr6:40	1.07245	.	43.1403	ATAC > CNV	De novo increase
chr7	139944367	139944609	0.0172708	0.000452581	mergeATAC_peak57728	44.1912	chr7:139	1.14517	.	43.046	ATAC > CNV	De novo increase
chr6	81713233	81713597	0.0120998	0.000257231	mergeATAC_peak52307	44.5704	chr6:81	1.57728	.	42.9931	ATAC > CNV	De novo increase
chr20	53778180	53778378	0.0120998	0.000257232	mergeATAC_peak37060	44.4221	chr20:53	1.54604	.	42.8761	ATAC > CNV	De novo increase
chr19	32382492	32382780	0.0244133	0.000796517	mergeATAC_peak29869	43.8842	chr19:32	1.05539	ZNF507	42.8289	ATAC > CNV	De novo increase
chr16	19284287	19284480	0.0244133	0.000796517	mergeATAC_peak22099	44.3061	chr16:19	1.63973	.	42.6664	ATAC > CNV	De novo increase
chr8	124147225	124147572	0.0172708	0.000452581	mergeATAC_peak60711	45.134	chr8:124	2.50338	.	42.6306	ATAC > CNV	De novo increase
chr8	111710178	111710409	0.00558331	8.30479e-05	mergeATAC_peak60366	46.9993	chr8:111	4.51602	.	42.4833	ATAC > CNV	De novo increase
chr2	38611418	38611693	0.0470618	0.00247438	mergeATAC_peak31902	43.6835	chr2:38	1.23779	.	42.4457	ATAC > CNV	De novo increase
chr7	105613558	105613919	0.0120998	0.000257232	mergeATAC_peak57012	43.7226	chr7:105	1.29446	.	42.4281	ATAC > CNV	De novo increase
chr19	47515548	47515781	0.0120998	0.000257232	mergeATAC_peak30647	43.5039	chr19:47	1.07739	NAPA	42.4265	ATAC > CNV	De novo increase
chr8	101757053	101757421	1.06433e-11	3.88496e-15	mergeATAC_peak60065	47.3772	chr8:101	5.18747	.	42.1898	ATAC > CNV	De novo increase
chr20	53830164	53830438	0.0244133	0.000796517	mergeATAC_peak37068	43.6484	chr20:53	1.54604	.	42.1024	ATAC > CNV	De novo increase
chr17	41322430	41322606	0.0172708	0.000452581	mergeATAC_peak25386	43.591	chr17:41	1.49656	TBC1D3P7	42.0945	ATAC > CNV	De novo increase
chr22	16441072	16441320	0.0244133	0.000796517	mergeATAC_peak38376	43.1056	chr22:16	1.06878	.	42.0368	ATAC > CNV	De novo increase
chr17	44103168	44103605	0.008272	0.000146189	mergeATAC_peak25610	43.1959	chr17:44	1.18887	.	42.007	ATAC > CNV	De novo increase
chr12	52888545	52888750	0.0344199	0.00140291	mergeATAC_peak13836	43.6229	chr12:52	1.6296	.	41.9933	ATAC > CNV	De novo increase
chr17	52156603	52156844	0.0470618	0.00247438	mergeATAC_peak26043	43.2377	chr17:52	1.24798	.	41.9897	ATAC > CNV	De novo increase
chr8	136026833	136026987	0.0344199	0.00140291	mergeATAC_peak61189	47.6915	chr8:136	5.87389	.	41.8176	ATAC > CNV	De novo increase
chr4	140097537	140097832	0.0120998	0.000257232	mergeATAC_peak45471	42.7745	chr4:140	1.06652	.	41.708	ATAC > CNV	De novo increase
chr17	59620604	59620790	0.0344199	0.00140291	mergeATAC_peak26233	42.8806	chr17:59	1.27411	CLTC;ENSG00000273702	41.6065	ATAC > CNV	De novo increase
chr7	140897078	140897325	0.0344199	0.00140291	mergeATAC_peak57765	42.9056	chr7:140	1.30471	.	41.6009	ATAC > CNV	De novo increase
chr6	1295813	1296041	0.0244133	0.000796517	mergeATAC_peak49848	42.7232	chr6:1	1.31033	.	41.4128	ATAC > CNV	De novo increase
chr19	38885537	38885759	0.0172708	0.000452581	mergeATAC_peak30125	42.4314	chr19:38	1.03299	.	41.3984	ATAC > CNV	De novo increase
chr1	205579478	205579652	0.0244133	0.000796517	mergeATAC_peak5468	43.1136	chr1:205	1.74122	MFSD4A	41.3724	ATAC > CNV	De novo increase
chr1	155923072	155923462	0.0172708	0.000452581	mergeATAC_peak3979	43.6732	chr1:155	2.33204	.	41.3412	ATAC > CNV	De novo increase
chr6	21882080	21882444	0.0470618	0.00247438	mergeATAC_peak50501	42.3814	chr6:21	1.04238	.	41.339	ATAC > CNV	De novo increase
chr14	20743632	20743889	0.008272	0.000146189	mergeATAC_peak17308	42.7164	chr14:20	1.42176	.	41.2946	ATAC > CNV	De novo increase
chr20	45946428	45946752	0.0244133	0.000796517	mergeATAC_peak36768	43.0267	chr20:45	1.75187	.	41.2748	ATAC > CNV	De novo increase
chr5	151041938	151042166	0.0244133	0.000796517	mergeATAC_peak48950	42.644	chr5:151	1.43376	.	41.2102	ATAC > CNV	De novo increase
chr17	6413120	6413297	0.0470618	0.00247438	mergeATAC_peak24178	42.1588	chr17:6	1.03181	.	41.127	ATAC > CNV	De novo increase
chr16	50747628	50747906	0.00558331	8.30479e-05	mergeATAC_peak22746	42.6461	chr16:50	1.56238	.	41.0837	ATAC > CNV	De novo increase
chr8	133966497	133966686	0.0172708	0.000452581	mergeATAC_peak61113	47.2572	chr8:133	6.19438	.	41.0628	ATAC > CNV	De novo increase
chr6	108995367	108995707	0.0470618	0.00247438	mergeATAC_peak52807	41.8727	chr6:108	1.13633	.	40.7364	ATAC > CNV	De novo increase
chr11	10631832	10632093	0.008272	0.000146189	mergeATAC_peak9827	41.7286	chr11:10	1.01111	.	40.7174	ATAC > CNV	De novo increase
chr16	19138625	19138919	0.0120998	0.000257232	mergeATAC_peak22091	42.3489	chr16:19	1.63973	.	40.7091	ATAC > CNV	De novo increase
chr11	64835289	64835547	0.0244133	0.000796517	mergeATAC_peak10945	41.6279	chr11:64	1.11656	.	40.5113	ATAC > CNV	De novo increase
chr13	98476529	98476879	0.0344199	0.00140291	mergeATAC_peak16865	41.8825	chr13:98	1.38214	.	40.5003	ATAC > CNV	De novo increase
chr8	138206899	138207058	0.008272	0.000146189	mergeATAC_peak61227	45.9827	chr8:138	5.52961	.	40.4531	ATAC > CNV	De novo increase
chr20	63629603	63629829	0.0470618	0.00247438	mergeATAC_peak37309	42.0146	chr20:63	1.56202	.	40.4526	ATAC > CNV	De novo increase
chr5	178146523	178146814	0.008272	0.000146189	mergeATAC_peak49682	43.5437	chr5:178	3.15196	RMND5B	40.3918	ATAC > CNV	De novo increase
chr2	16021856	16022271	0.0120998	0.000257232	mergeATAC_peak31403	41.3278	chr2:16	1.10341	.	40.2244	ATAC > CNV	De novo increase
chr1	202693043	202693231	0.0172708	0.000452581	mergeATAC_peak5312	41.7681	chr1:202	1.56725	.	40.2008	ATAC > CNV	De novo increase
chr8	141041461	141041620	0.008272	0.000146189	mergeATAC_peak61338	44.2612	chr8:141	4.07364	.	40.1876	ATAC > CNV	De novo increase
chr15	88274623	88274846	0.0344199	0.00140291	mergeATAC_peak20913	41.4653	chr15:88	1.28571	.	40.1796	ATAC > CNV	De novo increase
chr21	42923946	42924124	0.0244133	0.000796517	mergeATAC_peak38180	41.7645	chr21:42	1.64538	.	40.1191	ATAC > CNV	De novo increase
chr13	77027221	77027520	0.0244133	0.000796517	mergeATAC_peak16547	41.5463	chr13:77	1.42877	FBXL3;ENSG00000274898;MYCBP2-AS1	40.1175	ATAC > CNV	De novo increase
chr17	81018112	81018329	0.0344199	0.00140291	mergeATAC_peak27139	42.2006	chr17:81	2.11727	ENSG00000262873	40.0833	ATAC > CNV	De novo increase
chr1	165887989	165888167	0.0470618	0.00247438	mergeATAC_peak4401	42.4224	chr1:165	2.36698	.	40.0554	ATAC > CNV	De novo increase
chr7	36161979	36162365	0.0244133	0.000796517	mergeATAC_peak55392	41.751	chr7:36	1.71592	.	40.0351	ATAC > CNV	De novo increase
chr7	76966181	76966472	0.0344199	0.00140291	mergeATAC_peak56254	41.6051	chr7:76	1.59521	.	40.0099	ATAC > CNV	De novo increase
chr3	16268176	16268333	0.0244133	0.000796517	mergeATAC_peak39969	41.2485	chr3:16	1.2395	.	40.009	ATAC > CNV	De novo increase
chr6	106745460	106745628	0.008272	0.000146189	mergeATAC_peak52730	41.6963	chr6:106	1.70797	LINC02532	39.9884	ATAC > CNV	De novo increase
chr7	5275239	5275437	0.0470618	0.00247438	mergeATAC_peak54600	41.1903	chr7:5	1.22893	SLC29A4	39.9614	ATAC > CNV	De novo increase
chr1	184929976	184930255	0.0344199	0.00140291	mergeATAC_peak4968	40.9887	chr1:184	1.18649	.	39.8022	ATAC > CNV	De novo increase
chr8	141036137	141036336	0.0244133	0.000796517	mergeATAC_peak61336	43.8155	chr8:141	4.07364	.	39.7419	ATAC > CNV	De novo increase
chr1	108520492	108520641	0.0344199	0.00140291	mergeATAC_peak2808	41.1977	chr1:108	1.60047	.	39.5972	ATAC > CNV	De novo increase
chr5	175378506	175379046	0.0244133	0.000796517	mergeATAC_peak49559	40.6874	chr5:175	1.10379	.	39.5836	ATAC > CNV	De novo increase
chr13	98988429	98988645	0.0120998	0.000257232	mergeATAC_peak16888	40.9392	chr13:98	1.38214	.	39.557	ATAC > CNV	De novo increase
chr20	53901205	53901371	0.0344199	0.00140291	mergeATAC_peak37076	41.0874	chr20:53	1.54604	.	39.5414	ATAC > CNV	De novo increase
chr8	139653533	139653861	0.0120998	0.000257232	mergeATAC_peak61278	43.1091	chr8:139	3.67788	KCNK9	39.4312	ATAC > CNV	De novo increase
chr7	26083207	26083504	0.0172708	0.000452581	mergeATAC_peak55139	40.27	chr7:26	1.01573	.	39.2543	ATAC > CNV	De novo increase
chr8	119983255	119983503	0.0244133	0.000796517	mergeATAC_peak60574	41.6867	chr8:119	2.50998	.	39.1767	ATAC > CNV	De novo increase
chr9	94438386	94438878	0.00558331	8.30479e-05	mergeATAC_peak63073	40.535	chr9:94	1.37538	.	39.1596	ATAC > CNV	De novo increase
chr16	27321639	27321807	0.0172708	0.000452581	mergeATAC_peak22329	40.5388	chr16:27	1.42708	.	39.1117	ATAC > CNV	De novo increase
chr1	160941442	160941778	0.0244133	0.000796517	mergeATAC_peak4210	41.0896	chr1:160	2.11608	.	38.9735	ATAC > CNV	De novo increase
chr17	45043294	45043593	0.0244133	0.000796517	mergeATAC_peak25662	40.3464	chr17:45	1.46347	.	38.883	ATAC > CNV	De novo increase
chr1	180128257	180128421	0.0470618	0.00247438	mergeATAC_peak4791	40.1863	chr1:180	1.40823	.	38.778	ATAC > CNV	De novo increase
chr1	160862751	160863005	0.0470618	0.00247438	mergeATAC_peak4202	40.8034	chr1:160	2.11608	CD244	38.6874	ATAC > CNV	De novo increase
chr21	42315325	42315501	0.0244133	0.000796517	mergeATAC_peak38138	40.2984	chr21:42	1.64538	TFF3	38.653	ATAC > CNV	De novo increase
chr5	178081632	178081806	0.0172708	0.000452581	mergeATAC_peak49670	41.6899	chr5:178	3.15196	.	38.5379	ATAC > CNV	De novo increase
chr1	212721603	212721891	0.0470618	0.00247438	mergeATAC_peak5798	40.1609	chr1:212	1.69107	.	38.4699	ATAC > CNV	De novo increase
chr1	159946093	159946324	0.008272	0.000146189	mergeATAC_peak4158	40.6713	chr1:159	2.27631	IGSF9	38.395	ATAC > CNV	De novo increase
chr9	134060102	134060354	0.0470618	0.00247438	mergeATAC_peak64430	39.5259	chr9:134	1.19834	.	38.3276	ATAC > CNV	De novo increase
chr1	234772410	234772754	0.0172708	0.000452581	mergeATAC_peak6464	40.2891	chr1:234	2.07983	ENSG00000289377	38.2093	ATAC > CNV	De novo increase
chr7	810499	810828	0.00558331	8.30479e-05	mergeATAC_peak54431	39.5086	chr7:0	1.40807	.	38.1005	ATAC > CNV	De novo increase
chr17	22762042	22762221	0.0344199	0.00140291	mergeATAC_peak24804	39.6789	chr17:22	1.72445	.	37.9544	ATAC > CNV	De novo increase
chr6	168583881	168584138	0.0244133	0.000796517	mergeATAC_peak54321	39.2587	chr6:168	1.5192	.	37.7395	ATAC > CNV	De novo increase
chr9	95317739	95317970	0.0120998	0.000257232	mergeATAC_peak63139	38.798	chr9:95	1.05944	FANCC	37.7386	ATAC > CNV	De novo increase
chr8	126117251	126117540	0.0172708	0.000452581	mergeATAC_peak60825	41.2025	chr8:126	3.59075	.	37.6118	ATAC > CNV	De novo increase
chr19	38837836	38838097	0.0470618	0.00247438	mergeATAC_peak30118	38.6187	chr19:38	1.03299	HNRNPL	37.5857	ATAC > CNV	De novo increase
chr16	28141351	28141530	0.0470618	0.00247438	mergeATAC_peak22341	38.6076	chr16:28	1.04161	.	37.566	ATAC > CNV	De novo increase
chr6	87848647	87848963	0.0172708	0.000452581	mergeATAC_peak52439	38.7489	chr6:87	1.24613	.	37.5028	ATAC > CNV	De novo increase
chr1	165526411	165526560	0.0470618	0.00247438	mergeATAC_peak4380	39.8447	chr1:165	2.36698	.	37.4778	ATAC > CNV	De novo increase
chr9	93183976	93184197	0.0344199	0.00140291	mergeATAC_peak63031	38.9343	chr9:93	1.52556	WNK2	37.4087	ATAC > CNV	De novo increase
chr1	234531902	234532145	0.0172708	0.000452581	mergeATAC_peak6440	39.4204	chr1:234	2.07983	LINC01354;ENSG00000288760	37.3406	ATAC > CNV	De novo increase
chr15	40075207	40075407	0.0344199	0.00140291	mergeATAC_peak19522	38.7397	chr15:40	1.46465	.	37.2751	ATAC > CNV	De novo increase
chr21	41704306	41704528	0.0172708	0.000452581	mergeATAC_peak38094	38.8781	chr21:41	1.72584	.	37.1523	ATAC > CNV	De novo increase
chr7	134356143	134356399	0.0470618	0.00247438	mergeATAC_peak57595	38.2156	chr7:134	1.06945	.	37.1461	ATAC > CNV	De novo increase
chr1	213934693	213934979	0.0470618	0.00247438	mergeATAC_peak5822	38.3375	chr1:213	1.24776	.	37.0897	ATAC > CNV	De novo increase
chr16	1471024	1471286	0.0470618	0.00247438	mergeATAC_peak21436	38.4084	chr16:1	1.35645	CLCN7	37.052	ATAC > CNV	De novo increase
chr1	115317564	115317832	0.0120998	0.000257232	mergeATAC_peak3106	38.1899	chr1:115	1.1395	.	37.0504	ATAC > CNV	De novo increase
chr1	155591897	155592107	0.0120998	0.000257232	mergeATAC_peak3964	39.099	chr1:155	2.33204	ENSG00000223503	36.7669	ATAC > CNV	De novo increase
chr2	96881586	96881824	0.0344199	0.00140291	mergeATAC_peak33040	37.6832	chr2:96	1.03495	.	36.6482	ATAC > CNV	De novo increase
chr9	129058177	129058542	0.0244133	0.000796517	mergeATAC_peak64187	38.0526	chr9:129	1.43556	.	36.617	ATAC > CNV	De novo increase
chr5	66891224	66891382	0.0470618	0.00247438	mergeATAC_peak47378	37.7259	chr5:66	1.20807	.	36.5178	ATAC > CNV	De novo increase
chr7	127123886	127124284	0.0344199	0.00140291	mergeATAC_peak57415	37.9598	chr7:127	1.45119	.	36.5086	ATAC > CNV	De novo increase
chr6	148263086	148263287	0.0172708	0.000452581	mergeATAC_peak53707	37.9091	chr6:148	1.40268	.	36.5064	ATAC > CNV	De novo increase
chr6	30475736	30475936	0.0344199	0.00140291	mergeATAC_peak50816	38.5156	chr6:30	2.02326	.	36.4924	ATAC > CNV	De novo increase
chr9	111810504	111810776	0.008272	0.000146189	mergeATAC_peak63538	37.8875	chr9:111	1.40682	.	36.4807	ATAC > CNV	De novo increase
chr14	105469762	105470040	0.0344199	0.00140291	mergeATAC_peak19186	37.4637	chr14:105	1.05808	MTA1;ENSG00000257270	36.4057	ATAC > CNV	De novo increase
chr1	39912565	39912807	0.0344199	0.00140291	mergeATAC_peak1549	37.6556	chr1:39	1.26993	.	36.3857	ATAC > CNV	De novo increase
chr16	25813557	25813968	0.0172708	0.000452581	mergeATAC_peak22309	37.8496	chr16:25	1.47725	.	36.3724	ATAC > CNV	De novo increase
chr8	134839410	134839570	0.0172708	0.000452581	mergeATAC_peak61155	42.9104	chr8:134	6.53886	.	36.3716	ATAC > CNV	De novo increase
chr19	47963290	47963457	0.0344199	0.00140291	mergeATAC_peak30674	37.3829	chr19:47	1.07739	.	36.3055	ATAC > CNV	De novo increase
chr11	9139073	9139228	0.0470618	0.00247438	mergeATAC_peak9775	37.3265	chr11:9	1.02097	SCUBE2	36.3055	ATAC > CNV	De novo increase
chr7	6842694	6842916	0.0244133	0.000796517	mergeATAC_peak54679	37.7614	chr7:6	1.55343	.	36.2079	ATAC > CNV	De novo increase
chr8	125176818	125176971	0.008272	0.000146189	mergeATAC_peak60774	38.6264	chr8:125	2.49263	.	36.1338	ATAC > CNV	De novo increase
chr8	119819632	119819781	0.0470618	0.00247438	mergeATAC_peak60565	38.618	chr8:119	2.50998	.	36.1081	ATAC > CNV	De novo increase
chr6	168001064	168001332	0.0172708	0.000452581	mergeATAC_peak54287	37.5778	chr6:168	1.5192	KIF25	36.0587	ATAC > CNV	De novo increase
chr15	40477818	40478196	0.0244133	0.000796517	mergeATAC_peak19565	37.518	chr15:40	1.46465	.	36.0534	ATAC > CNV	De novo increase
chr8	129953926	129954146	0.0120998	0.000257232	mergeATAC_peak60980	40.6732	chr8:129	4.64042	ENSG00000287195	36.0327	ATAC > CNV	De novo increase
chr8	123922447	123922704	0.0172708	0.000452581	mergeATAC_peak60702	37.7448	chr8:123	1.87538	.	35.8694	ATAC > CNV	De novo increase
chr8	30137341	30137590	0.0344199	0.00140291	mergeATAC_peak58891	36.9132	chr8:30	1.19424	.	35.719	ATAC > CNV	De novo increase
chr13	106507991	106508205	0.0244133	0.000796517	mergeATAC_peak17031	37.2966	chr13:106	1.57923	.	35.7174	ATAC > CNV	De novo increase
chr11	68141858	68142144	0.0244133	0.000796517	mergeATAC_peak11192	36.7239	chr11:68	1.01587	.	35.708	ATAC > CNV	De novo increase
chr7	46651146	46651311	0.0244133	0.000796517	mergeATAC_peak55645	36.8788	chr7:46	1.20252	.	35.6762	ATAC > CNV	De novo increase
chr1	110766173	110766363	0.00558331	8.30479e-05	mergeATAC_peak2955	37.6017	chr1:110	1.92785	.	35.6738	ATAC > CNV	De novo increase
chr1	160043035	160043238	0.0344199	0.00140291	mergeATAC_peak4164	37.7763	chr1:160	2.11608	KCNJ10	35.6602	ATAC > CNV	De novo increase
chr7	38688108	38688360	0.0470618	0.00247438	mergeATAC_peak55467	36.8575	chr7:38	1.21146	.	35.646	ATAC > CNV	De novo increase
chr18	976147	976421	0.0344199	0.00140291	mergeATAC_peak27386	36.8767	chr18:0	1.32092	ENSG00000263551;ENSG00000272461	35.5558	ATAC > CNV	De novo increase
chr5	55304614	55304869	0.0120998	0.000257232	mergeATAC_peak47168	36.5788	chr5:55	1.08918	.	35.4896	ATAC > CNV	De novo increase
chr8	142710395	142710574	0.0120998	0.000257232	mergeATAC_peak61422	38.6553	chr8:142	3.20182	.	35.4535	ATAC > CNV	De novo increase
chr8	99600122	99600429	0.0172708	0.000452581	mergeATAC_peak59915	38.6362	chr8:99	3.19132	.	35.4449	ATAC > CNV	De novo increase
chr21	38853425	38853691	0.0244133	0.000796517	mergeATAC_peak37978	37.1841	chr21:38	1.91717	.	35.2669	ATAC > CNV	De novo increase
chr8	111966228	111966443	0.0470618	0.00247438	mergeATAC_peak60377	39.7534	chr8:111	4.51602	.	35.2374	ATAC > CNV	De novo increase
chr20	57039517	57039892	0.0344199	0.00140291	mergeATAC_peak37136	36.5501	chr20:57	1.55855	.	34.9916	ATAC > CNV	De novo increase
chr4	9825029	9825302	0.0244133	0.000796517	mergeATAC_peak43683	35.9594	chr4:9	1.00745	.	34.952	ATAC > CNV	De novo increase
chr6	44422603	44422797	0.0344199	0.00140291	mergeATAC_peak51617	36.7422	chr6:44	1.81935	.	34.9228	ATAC > CNV	De novo increase
chr14	81710372	81710521	0.0470618	0.00247438	mergeATAC_peak18648	36.1335	chr14:81	1.2998	.	34.8337	ATAC > CNV	De novo increase
chr8	101462433	101462673	0.0120998	0.000257232	mergeATAC_peak60035	39.8842	chr8:101	5.18747	.	34.6967	ATAC > CNV	De novo increase
chr20	53604343	53604582	0.0244133	0.000796517	mergeATAC_peak37042	36.2131	chr20:53	1.54604	.	34.6671	ATAC > CNV	De novo increase
chr6	32307783	32308034	0.0244133	0.000796517	mergeATAC_peak50995	36.3434	chr6:32	1.68896	.	34.6544	ATAC > CNV	De novo increase
chr8	100748152	100748304	0.0244133	0.000796517	mergeATAC_peak59990	42.2848	chr8:100	7.66417	.	34.6207	ATAC > CNV	De novo increase
chr1	235441869	235442184	0.0470618	0.00247438	mergeATAC_peak6526	35.9842	chr1:235	1.37278	TBCE	34.6114	ATAC > CNV	De novo increase
chr6	165309209	165309449	0.0470618	0.00247438	mergeATAC_peak54187	36.4475	chr6:165	1.87438	C6orf118	34.5732	ATAC > CNV	De novo increase
chr8	115589399	115589641	0.0344199	0.00140291	mergeATAC_peak60434	39.1232	chr8:115	4.57805	.	34.5452	ATAC > CNV	De novo increase
chr1	151769174	151769323	0.0344199	0.00140291	mergeATAC_peak3718	37.4319	chr1:151	2.96475	ENSG00000249602	34.4671	ATAC > CNV	De novo increase
chr7	66182984	66183313	0.0344199	0.00140291	mergeATAC_peak55915	35.7073	chr7:66	1.33995	.	34.3673	ATAC > CNV	De novo increase
chr7	16904167	16904339	0.0470618	0.00247438	mergeATAC_peak54879	36.334	chr7:16	1.99144	.	34.3426	ATAC > CNV	De novo increase
chr4	38609609	38609821	0.0344199	0.00140291	mergeATAC_peak44063	35.3226	chr4:38	1.07048	.	34.2521	ATAC > CNV	De novo increase
chr18	69455217	69455481	0.0244133	0.000796517	mergeATAC_peak28520	35.2688	chr18:69	1.01959	.	34.2492	ATAC > CNV	De novo increase
chr22	46080498	46080675	0.0470618	0.00247438	mergeATAC_peak39480	35.2399	chr22:46	1.0346	MIRLET7BHG	34.2053	ATAC > CNV	De novo increase
chr12	508633	508793	0.0470618	0.00247438	mergeATAC_peak12658	34.9955	chr12:0	1.05655	.	33.9389	ATAC > CNV	De novo increase
chr19	45059551	45059779	0.0244133	0.000796517	mergeATAC_peak30462	34.8615	chr19:45	1.0633	.	33.7982	ATAC > CNV	De novo increase
chr6	4607156	4607386	0.0344199	0.00140291	mergeATAC_peak49989	34.9121	chr6:4	1.12102	.	33.7911	ATAC > CNV	De novo increase
chr16	691387	691600	0.0344199	0.00140291	mergeATAC_peak21375	35.2067	chr16:0	1.41599	WDR24	33.7907	ATAC > CNV	De novo increase
chr6	28895522	28895740	0.0470618	0.00247438	mergeATAC_peak50751	35.4215	chr6:28	1.65318	HCG14	33.7683	ATAC > CNV	De novo increase
chr2	47655036	47655406	0.0172708	0.000452581	mergeATAC_peak32139	34.8625	chr2:47	1.10596	.	33.7565	ATAC > CNV	De novo increase
chr5	6117254	6117512	0.0244133	0.000796517	mergeATAC_peak46424	35.1042	chr5:6	1.35516	.	33.749	ATAC > CNV	De novo increase
chr8	136076415	136076625	0.0470618	0.00247438	mergeATAC_peak61191	39.6217	chr8:136	5.87389	.	33.7478	ATAC > CNV	De novo increase
chr15	88834419	88834608	0.0470618	0.00247438	mergeATAC_peak20924	34.9744	chr15:88	1.28571	.	33.6887	ATAC > CNV	De novo increase
chr1	227281937	227282212	0.0244133	0.000796517	mergeATAC_peak6214	35.8403	chr1:227	2.17817	.	33.6621	ATAC > CNV	De novo increase
chr7	76093616	76093863	0.0344199	0.00140291	mergeATAC_peak56199	35.2375	chr7:76	1.59521	.	33.6423	ATAC > CNV	De novo increase
chr6	12363955	12364104	0.0470618	0.00247438	mergeATAC_peak50215	34.6616	chr6:12	1.03078	.	33.6308	ATAC > CNV	De novo increase
chr1	169781425	169781691	0.0344199	0.00140291	mergeATAC_peak4524	35.1373	chr1:169	1.56259	.	33.5747	ATAC > CNV	De novo increase
chr18	9846600	9846841	0.0344199	0.00140291	mergeATAC_peak27580	34.9627	chr18:9	1.41331	.	33.5494	ATAC > CNV	De novo increase
chr8	100025072	100025267	0.0120998	0.000257232	mergeATAC_peak59924	41.21	chr8:100	7.66417	ENSG00000221753	33.5458	ATAC > CNV	De novo increase
chr7	108341036	108341360	0.0470618	0.00247438	mergeATAC_peak57104	34.7874	chr7:108	1.29873	.	33.4887	ATAC > CNV	De novo increase
chr17	73255747	73255970	0.0244133	0.000796517	mergeATAC_peak26676	34.4736	chr17:73	1.00336	.	33.4703	ATAC > CNV	De novo increase
chr11	33235149	33235615	0.0244133	0.000796517	mergeATAC_peak10264	34.4553	chr11:33	1.10467	.	33.3506	ATAC > CNV	De novo increase
chr6	37319959	37320228	0.0470618	0.00247438	mergeATAC_peak51303	34.4913	chr6:37	1.18086	.	33.3105	ATAC > CNV	De novo increase
chr7	76089901	76090241	0.0470618	0.00247438	mergeATAC_peak56198	34.8765	chr7:76	1.59521	.	33.2813	ATAC > CNV	De novo increase
chr16	19850229	19850485	0.0244133	0.000796517	mergeATAC_peak22125	34.8903	chr16:19	1.63973	.	33.2505	ATAC > CNV	De novo increase
chr19	57651298	57651607	0.0244133	0.000796517	mergeATAC_peak31082	34.8921	chr19:57	1.67364	.	33.2184	ATAC > CNV	De novo increase
chr19	52336087	52336298	0.0344199	0.00140291	mergeATAC_peak30912	34.7737	chr19:52	1.55725	ZNF610	33.2164	ATAC > CNV	De novo increase
chr10	34427414	34427673	0.0344199	0.00140291	mergeATAC_peak7482	34.2602	chr10:34	1.08758	PARD3	33.1726	ATAC > CNV	De novo increase
chr9	132970757	132971023	0.0344199	0.00140291	mergeATAC_peak64357	34.2073	chr9:132	1.06766	.	33.1396	ATAC > CNV	De novo increase
chr1	180098575	180098950	0.0344199	0.00140291	mergeATAC_peak4790	34.496	chr1:180	1.40823	.	33.0877	ATAC > CNV	De novo increase
chr20	46752734	46752902	0.0344199	0.00140291	mergeATAC_peak36801	34.2187	chr20:46	1.14779	.	33.071	ATAC > CNV	De novo increase
chr2	201580561	201580924	0.0244133	0.000796517	mergeATAC_peak34768	34.0236	chr2:201	1.07481	.	32.9488	ATAC > CNV	De novo increase
chr17	45150862	45151021	0.0172708	0.000452581	mergeATAC_peak25671	34.319	chr17:45	1.46347	.	32.8555	ATAC > CNV	De novo increase
chr17	50954347	50954509	0.0470618	0.00247438	mergeATAC_peak26013	35.1536	chr17:50	2.32619	.	32.8274	ATAC > CNV	De novo increase
chr9	130958511	130958660	0.0470618	0.00247438	mergeATAC_peak64286	33.831	chr9:130	1.03156	.	32.7995	ATAC > CNV	De novo increase
chr17	77893858	77894044	0.0470618	0.00247438	mergeATAC_peak26970	34.2039	chr17:77	1.41608	.	32.7878	ATAC > CNV	De novo increase
chr16	47774600	47774973	0.0470618	0.00247438	mergeATAC_peak22646	33.7513	chr16:47	1.01081	.	32.7405	ATAC > CNV	De novo increase
chr17	8249254	8249469	0.0470618	0.00247438	mergeATAC_peak24359	34.3721	chr17:8	1.63259	PFAS	32.7395	ATAC > CNV	De novo increase
chr2	189595425	189595681	0.0470618	0.00247438	mergeATAC_peak34521	33.8081	chr2:189	1.07978	.	32.7283	ATAC > CNV	De novo increase
chr15	94065984	94066342	0.0344199	0.00140291	mergeATAC_peak21148	33.6152	chr15:94	1.01444	.	32.6007	ATAC > CNV	De novo increase
chr7	81161392	81161648	0.0172708	0.000452581	mergeATAC_peak56366	33.9457	chr7:81	1.44463	.	32.501	ATAC > CNV	De novo increase
chr6	90197955	90198141	0.0470618	0.00247438	mergeATAC_peak52497	33.903	chr6:90	1.41052	.	32.4924	ATAC > CNV	De novo increase
chr8	116574953	116575265	0.0172708	0.000452581	mergeATAC_peak60453	34.6016	chr8:116	2.13544	.	32.4662	ATAC > CNV	De novo increase
chr1	108721292	108721528	0.0470618	0.00247438	mergeATAC_peak2819	34.0613	chr1:108	1.60047	FNDC7	32.4609	ATAC > CNV	De novo increase
chr1	243748786	243748982	0.0344199	0.00140291	mergeATAC_peak6668	33.618	chr1:243	1.16033	.	32.4577	ATAC > CNV	De novo increase
chr14	95467241	95467494	0.0470618	0.00247438	mergeATAC_peak18879	33.5907	chr14:95	1.13671	SYNE3	32.454	ATAC > CNV	De novo increase
chr6	15843753	15844015	0.0470618	0.00247438	mergeATAC_peak50322	33.5252	chr6:15	1.08704	.	32.4381	ATAC > CNV	De novo increase
chr22	16601096	16601405	0.0470618	0.00247438	mergeATAC_peak38377	33.4883	chr22:16	1.06878	TPTEP1;ENSG00000283633	32.4195	ATAC > CNV	De novo increase
chr1	165539413	165539567	0.0344199	0.00140291	mergeATAC_peak4383	34.7665	chr1:165	2.36698	LRRC52-AS1	32.3995	ATAC > CNV	De novo increase
chr3	160127326	160127518	0.0244133	0.000796517	mergeATAC_peak42540	33.3716	chr3:160	1.00077	.	32.3708	ATAC > CNV	De novo increase
chr19	44401471	44401732	0.0344199	0.00140291	mergeATAC_peak30414	34.0674	chr19:44	1.72086	ZNF285;ENSG00000267173	32.3465	ATAC > CNV	De novo increase
chr20	53656828	53657009	0.0244133	0.000796517	mergeATAC_peak37052	33.8891	chr20:53	1.54604	.	32.3431	ATAC > CNV	De novo increase
chr20	53608814	53608996	0.0344199	0.00140291	mergeATAC_peak37044	33.8646	chr20:53	1.54604	ZNF217;ENSG00000235415	32.3185	ATAC > CNV	De novo increase
chr1	229058712	229058949	0.0244133	0.000796517	mergeATAC_peak6289	33.6531	chr1:229	1.3457	.	32.3074	ATAC > CNV	De novo increase
chr17	36722199	36722520	0.0244133	0.000796517	mergeATAC_peak25132	33.2987	chr17:36	1.02885	ENSG00000275613	32.2698	ATAC > CNV	De novo increase
chr1	114282911	114283113	0.0344199	0.00140291	mergeATAC_peak3083	33.6319	chr1:114	1.37629	.	32.2556	ATAC > CNV	De novo increase
chr1	225845810	225846017	0.0344199	0.00140291	mergeATAC_peak6141	33.8239	chr1:225	1.57633	ENSG00000242861	32.2475	ATAC > CNV	De novo increase
chr8	111036751	111037030	0.0244133	0.000796517	mergeATAC_peak60357	36.7355	chr8:111	4.51602	LINC01608	32.2195	ATAC > CNV	De novo increase
chr19	35479399	35479604	0.0244133	0.000796517	mergeATAC_peak29974	33.2054	chr19:35	1.06012	.	32.1453	ATAC > CNV	De novo increase
chr11	118410448	118410690	0.0344199	0.00140291	mergeATAC_peak12217	33.2044	chr11:118	1.07719	.	32.1272	ATAC > CNV	De novo increase
chr5	165457976	165458166	0.0470618	0.00247438	mergeATAC_peak49315	34.9645	chr5:165	2.84736	.	32.1171	ATAC > CNV	De novo increase
chr17	1092013	1092173	0.0344199	0.00140291	mergeATAC_peak23916	33.5517	chr17:1	1.4726	ABR	32.0791	ATAC > CNV	De novo increase
chr17	78865845	78866026	0.0344199	0.0014029	mergeATAC_peak27036	33.5836	chr17:78	1.52407	.	32.0595	ATAC > CNV	De novo increase
chr1	161256644	161256818	0.0470618	0.00247438	mergeATAC_peak4249	34.6554	chr1:161	2.73056	.	31.9249	ATAC > CNV	De novo increase
chr6	89281910	89282066	0.0470618	0.00247438	mergeATAC_peak52464	33.3286	chr6:89	1.44211	.	31.8864	ATAC > CNV	De novo increase
chr8	101667846	101668086	0.0244133	0.000796517	mergeATAC_peak60061	37.0537	chr8:101	5.18747	.	31.8662	ATAC > CNV	De novo increase
chr6	33375320	33375515	0.0172708	0.000452581	mergeATAC_peak51102	33.4992	chr6:33	1.70976	.	31.7895	ATAC > CNV	De novo increase
chr11	65516149	65516370	0.0244133	0.000796517	mergeATAC_peak11008	33.4799	chr11:65	1.69585	.	31.7841	ATAC > CNV	De novo increase
chr20	62668601	62668760	0.0470618	0.00247438	mergeATAC_peak37263	33.1773	chr20:62	1.39476	SLCO4A1	31.7826	ATAC > CNV	De novo increase
chr19	43774579	43774807	0.0470618	0.00247438	mergeATAC_peak30391	33.1324	chr19:43	1.38065	KCNN4	31.7518	ATAC > CNV	De novo increase
chr19	37301871	37302084	0.0244133	0.000796517	mergeATAC_peak30049	33.2529	chr19:37	1.63227	.	31.6206	ATAC > CNV	De novo increase
chr1	146448907	146449113	0.0470618	0.00247438	mergeATAC_peak3440	33.0319	chr1:146	1.43514	.	31.5968	ATAC > CNV	De novo increase
chr8	129985629	129985813	5.38628e-05	2.05618e-07	mergeATAC_peak60983	36.18	chr8:129	4.64042	.	31.5396	ATAC > CNV	De novo increase
chr21	43734898	43735156	0.0470618	0.00247438	mergeATAC_peak38218	32.6694	chr21:43	1.21363	PDXK	31.4558	ATAC > CNV	De novo increase
chr6	41939433	41939652	0.0470618	0.00247438	mergeATAC_peak51462	32.957	chr6:41	1.5177	CCND3	31.4393	ATAC > CNV	De novo increase
chr16	53031400	53031580	0.0344199	0.00140291	mergeATAC_peak22792	32.5879	chr16:53	1.20988	.	31.378	ATAC > CNV	De novo increase
chr1	117217958	117218231	0.0172708	0.000452581	mergeATAC_peak3189	32.4995	chr1:117	1.1261	.	31.3734	ATAC > CNV	De novo increase
chr16	52578218	52578483	0.0244133	0.000796517	mergeATAC_peak22782	32.5523	chr16:52	1.22707	.	31.3252	ATAC > CNV	De novo increase
chr16	11401278	11401488	0.0244133	0.000796512	mergeATAC_peak21882	33.0937	chr16:11	1.87657	ENSG00000188897	31.2171	ATAC > CNV	De novo increase
chr17	16803238	16803510	0.0244133	0.000796517	mergeATAC_peak24575	32.6375	chr17:16	1.49885	.	31.1387	ATAC > CNV	De novo increase
chr1	178608437	178608757	0.0244133	0.000796517	mergeATAC_peak4751	32.4481	chr1:178	1.35692	.	31.0912	ATAC > CNV	De novo increase
chr5	150801654	150801921	0.0470618	0.00247438	mergeATAC_peak48944	33.2389	chr5:150	2.16571	.	31.0732	ATAC > CNV	De novo increase
chr16	57694660	57694904	0.0344199	0.00140291	mergeATAC_peak22993	33.0026	chr16:57	1.94669	DRC7	31.0559	ATAC > CNV	De novo increase
chr17	63780628	63780834	0.0244133	0.000796517	mergeATAC_peak26374	32.3633	chr17:63	1.32444	.	31.0389	ATAC > CNV	De novo increase
chr17	8237430	8237678	0.0470618	0.00247438	mergeATAC_peak24357	32.5989	chr17:8	1.63259	CTC1	30.9663	ATAC > CNV	De novo increase
chr21	33072041	33072222	0.0172708	0.000452581	mergeATAC_peak37752	32.4322	chr21:33	1.50131	ENSG00000227757;OLIG1	30.9309	ATAC > CNV	De novo increase
chr1	244458858	244459016	0.0470618	0.00247438	mergeATAC_peak6692	32.9462	chr1:244	2.01739	.	30.9288	ATAC > CNV	De novo increase
chr11	134262089	134262250	0.0344199	0.00140291	mergeATAC_peak12614	31.936	chr11:134	1.02896	ACAD8	30.907	ATAC > CNV	De novo increase
chr11	20112609	20112765	0.0470618	0.00247438	mergeATAC_peak10121	31.8211	chr11:20	1.02815	.	30.7929	ATAC > CNV	De novo increase
chr6	27280149	27280411	0.0470618	0.00247438	mergeATAC_peak50674	32.494	chr6:27	1.73933	.	30.7547	ATAC > CNV	De novo increase
chr9	120348942	120349096	0.0470618	0.00247438	mergeATAC_peak63775	32.7485	chr9:120	1.99668	.	30.7518	ATAC > CNV	De novo increase
chr8	37604464	37604649	0.0470618	0.00247436	mergeATAC_peak58975	31.727	chr8:37	1.06431	.	30.6627	ATAC > CNV	De novo increase
chr6	35241516	35241739	0.0470618	0.00247438	mergeATAC_peak51190	31.8204	chr6:35	1.29749	.	30.523	ATAC > CNV	De novo increase
chr7	47969551	47969810	0.0470618	0.00247438	mergeATAC_peak55691	31.9115	chr7:47	1.39904	.	30.5124	ATAC > CNV	De novo increase
chr8	129878616	129878806	0.0344199	0.00140291	mergeATAC_peak60977	35.1417	chr8:129	4.64042	.	30.5013	ATAC > CNV	De novo increase
chr16	56275010	56275311	0.0470618	0.00247438	mergeATAC_peak22900	31.7409	chr16:56	1.25575	GNAO1	30.4852	ATAC > CNV	De novo increase
chr17	49515383	49515608	0.0244133	0.000796517	mergeATAC_peak25869	31.9868	chr17:49	1.5292	.	30.4576	ATAC > CNV	De novo increase
chr6	121048731	121048909	0.0344199	0.00140291	mergeATAC_peak53045	32.0975	chr6:121	1.65625	.	30.4413	ATAC > CNV	De novo increase
chr5	45359652	45359871	0.0344199	0.00140291	mergeATAC_peak47059	31.7633	chr5:45	1.52362	.	30.2397	ATAC > CNV	De novo increase
chr1	243850988	243851186	0.0470618	0.00247438	mergeATAC_peak6670	31.3702	chr1:243	1.16033	AKT3	30.2099	ATAC > CNV	De novo increase
chr1	109644521	109644670	0.0344199	0.00140291	mergeATAC_peak2885	32.9863	chr1:109	2.87466	.	30.1117	ATAC > CNV	De novo increase
chr5	42912309	42912473	0.0470618	0.00247438	mergeATAC_peak46996	32.005	chr5:42	1.97875	.	30.0262	ATAC > CNV	De novo increase
chr6	34021955	34022123	0.0120998	0.000257232	mergeATAC_peak51136	31.0855	chr6:34	1.12762	.	29.9579	ATAC > CNV	De novo increase
chr5	180134763	180134935	0.0244133	0.000796512	mergeATAC_peak49755	32.1537	chr5:180	2.38985	RASGEF1C	29.7638	ATAC > CNV	De novo increase
chr18	9547843	9548124	0.0172708	0.000452581	mergeATAC_peak27552	31.148	chr18:9	1.41331	.	29.7347	ATAC > CNV	De novo increase
chr16	21268336	21268636	0.0470618	0.00247438	mergeATAC_peak22168	30.8171	chr16:21	1.17712	.	29.64	ATAC > CNV	De novo increase
chr9	130051803	130051992	0.0344199	0.00140291	mergeATAC_peak64256	30.6089	chr9:130	1.03156	.	29.5774	ATAC > CNV	De novo increase
chr9	133686798	133686994	0.0470618	0.00247438	mergeATAC_peak64414	31.0329	chr9:133	1.47955	.	29.5534	ATAC > CNV	De novo increase
chr19	44207657	44207829	0.0344199	0.00140291	mergeATAC_peak30410	31.1928	chr19:44	1.72086	ZNF227	29.4719	ATAC > CNV	De novo increase
chr8	133242822	133243293	1.25709e-13	2.29428e-17	mergeATAC_peak61061	35.5946	chr8:133	6.19438	.	29.4002	ATAC > CNV	De novo increase
chr5	74895930	74896167	0.0244133	0.000796517	mergeATAC_peak47536	30.4688	chr5:74	1.07234	.	29.3964	ATAC > CNV	De novo increase
chr9	130433357	130433599	0.0470618	0.00247438	mergeATAC_peak64264	30.3239	chr9:130	1.03156	.	29.2923	ATAC > CNV	De novo increase
chr4	37383693	37383907	0.0470618	0.00247438	mergeATAC_peak44012	30.4508	chr4:37	1.28767	.	29.1631	ATAC > CNV	De novo increase
chr1	156284194	156284354	0.0470618	0.00247438	mergeATAC_peak4018	31.4551	chr1:156	2.3976	TMEM79	29.0575	ATAC > CNV	De novo increase
chr5	172709648	172709893	0.0470618	0.00247438	mergeATAC_peak49473	31.1599	chr5:172	2.23566	.	28.9242	ATAC > CNV	De novo increase
chr16	2163251	2163442	0.0244133	0.000796517	mergeATAC_peak21503	30.6111	chr16:2	1.69493	TRAF7	28.9162	ATAC > CNV	De novo increase
chr6	129684045	129684260	0.0470618	0.00247438	mergeATAC_peak53216	30.2353	chr6:129	1.47512	.	28.7601	ATAC > CNV	De novo increase
chr16	569510	569673	0.0244133	0.000796517	mergeATAC_peak21353	30.1193	chr16:0	1.41599	PIGQ;ENSG00000282907	28.7033	ATAC > CNV	De novo increase
chr8	142826457	142826703	0.0344199	0.00140291	mergeATAC_peak61434	31.897	chr8:142	3.20182	.	28.6952	ATAC > CNV	De novo increase
chr8	47384596	47384790	0.0244133	0.000796517	mergeATAC_peak59122	29.8818	chr8:47	1.24856	.	28.6333	ATAC > CNV	De novo increase
chr1	169460179	169460469	0.0470618	0.00247438	mergeATAC_peak4509	30.1559	chr1:169	1.56259	CCDC181	28.5933	ATAC > CNV	De novo increase
chr5	42945072	42945295	0.0244133	0.000796517	mergeATAC_peak46999	30.4709	chr5:42	1.97875	.	28.4922	ATAC > CNV	De novo increase
chr9	94634502	94634687	0.0470618	0.00247438	mergeATAC_peak63078	29.8108	chr9:94	1.37538	.	28.4355	ATAC > CNV	De novo increase
chr7	5177126	5177323	0.0470618	0.00247438	mergeATAC_peak54592	29.6611	chr7:5	1.22893	.	28.4322	ATAC > CNV	De novo increase
chr1	223971758	223972015	0.0470618	0.00247438	mergeATAC_peak6066	30.2375	chr1:223	1.8162	.	28.4213	ATAC > CNV	De novo increase
chr8	144391039	144391296	0.0470618	0.00247438	mergeATAC_peak61573	31.2441	chr8:144	2.8808	.	28.3633	ATAC > CNV	De novo increase
chr8	101426194	101426372	0.0120998	0.000257232	mergeATAC_peak60028	33.4604	chr8:101	5.18747	.	28.2729	ATAC > CNV	De novo increase
chr21	41362446	41362673	0.0344199	0.00140291	mergeATAC_peak38058	29.989	chr21:41	1.72584	MX2	28.2632	ATAC > CNV	De novo increase
chr8	136050069	136050336	0.0470618	0.00247438	mergeATAC_peak61190	34.1098	chr8:136	5.87389	.	28.2359	ATAC > CNV	De novo increase
chr8	100399668	100399889	8.63044e-05	3.66214e-07	mergeATAC_peak59953	35.8783	chr8:100	7.66417	.	28.2142	ATAC > CNV	De novo increase
chr6	167744854	167745099	0.0470618	0.00247438	mergeATAC_peak54271	29.4985	chr6:167	1.38444	.	28.1141	ATAC > CNV	De novo increase
chr1	110687276	110687441	0.0470618	0.00247438	mergeATAC_peak2954	30.0121	chr1:110	1.92785	.	28.0843	ATAC > CNV	De novo increase
chr1	242603746	242603964	0.0244133	0.000796517	mergeATAC_peak6648	29.3888	chr1:242	1.32906	.	28.0597	ATAC > CNV	De novo increase
chr13	38306575	38306770	0.0470618	0.00247438	mergeATAC_peak16039	29.0994	chr13:38	1.06909	.	28.0303	ATAC > CNV	De novo increase
chr6	85345589	85345831	0.0244133	0.000796517	mergeATAC_peak52381	30.136	chr6:85	2.12121	.	28.0148	ATAC > CNV	De novo increase
chr1	245497569	245497798	0.0344199	0.00140291	mergeATAC_peak6732	29.3039	chr1:245	1.29623	.	28.0077	ATAC > CNV	De novo increase
chr4	182307856	182308143	0.0470618	0.00247438	mergeATAC_peak46070	29.0987	chr4:182	1.0928	.	28.0059	ATAC > CNV	De novo increase
chr6	38755232	38755511	0.0470618	0.00247438	mergeATAC_peak51335	29.0044	chr6:38	1.01207	.	27.9923	ATAC > CNV	De novo increase
chr17	63889026	63889230	0.0344199	0.00140291	mergeATAC_peak26385	29.2458	chr17:63	1.32444	.	27.9214	ATAC > CNV	De novo increase
chr11	12216304	12216480	0.0470618	0.00247438	mergeATAC_peak9897	29.11	chr11:12	1.24173	.	27.8682	ATAC > CNV	De novo increase
chr2	132479126	132479396	0.0344199	0.00140291	mergeATAC_peak33723	29.1798	chr2:132	1.33263	.	27.8472	ATAC > CNV	De novo increase
chr1	151961953	151962139	0.0470618	0.00247438	mergeATAC_peak3737	30.7615	chr1:151	2.96475	.	27.7968	ATAC > CNV	De novo increase
chr6	37222160	37222327	0.0470618	0.00247438	mergeATAC_peak51296	28.5106	chr6:37	1.18086	.	27.3298	ATAC > CNV	De novo increase
chr16	19294169	19294358	0.0470618	0.00247438	mergeATAC_peak22100	28.9182	chr16:19	1.63973	.	27.2785	ATAC > CNV	De novo increase
chr13	94780077	94780291	0.0470618	0.00247438	mergeATAC_peak16759	28.515	chr13:94	1.29183	.	27.2232	ATAC > CNV	De novo increase
chr6	47184406	47184556	0.0470618	0.00247438	mergeATAC_peak51716	29.11	chr6:47	1.89002	.	27.22	ATAC > CNV	De novo increase
chr8	128197683	128197894	0.0120998	0.000257232	mergeATAC_peak60931	31.5491	chr8:128	4.36839	.	27.1807	ATAC > CNV	De novo increase
chr17	16171774	16172016	0.0244133	0.000796517	mergeATAC_peak24548	28.6044	chr17:16	1.49885	.	27.1055	ATAC > CNV	De novo increase
chr1	40729394	40729709	0.0470618	0.00247438	mergeATAC_peak1597	28.2249	chr1:40	1.14157	.	27.0833	ATAC > CNV	De novo increase
chr21	33413067	33413384	0.0470618	0.00247438	mergeATAC_peak37780	28.5358	chr21:33	1.50131	.	27.0345	ATAC > CNV	De novo increase
chr8	122678894	122679133	0.000139789	6.697e-07	mergeATAC_peak60642	28.6803	chr8:122	1.66942	.	27.0109	ATAC > CNV	De novo increase
chr8	139962832	139962981	0.0244133	0.000796517	mergeATAC_peak61290	30.6823	chr8:139	3.67788	.	27.0045	ATAC > CNV	De novo increase
chr7	99120610	99120841	0.0344199	0.00140291	mergeATAC_peak56732	28.5301	chr7:99	1.64852	.	26.8816	ATAC > CNV	De novo increase
chr8	119451975	119452153	0.0470618	0.00247438	mergeATAC_peak60558	29.2615	chr8:119	2.50998	.	26.7515	ATAC > CNV	De novo increase
chr16	11909048	11909316	0.0344199	0.00140291	mergeATAC_peak21922	28.6198	chr16:11	1.87657	ENSG00000261216	26.7432	ATAC > CNV	De novo increase
chr7	99220020	99220169	0.0344199	0.00140291	mergeATAC_peak56746	28.3809	chr7:99	1.64852	.	26.7324	ATAC > CNV	De novo increase
chr2	54614933	54615148	0.0344199	0.00140291	mergeATAC_peak32213	27.8352	chr2:54	1.11222	.	26.7229	ATAC > CNV	De novo increase
chr1	151653504	151653689	0.0344199	0.00140291	mergeATAC_peak3705	29.6669	chr1:151	2.96475	.	26.7021	ATAC > CNV	De novo increase
chr5	150567125	150567282	0.0344199	0.00140291	mergeATAC_peak48924	28.7142	chr5:150	2.16571	.	26.5485	ATAC > CNV	De novo increase
chr16	10121604	10121834	0.0470618	0.00247438	mergeATAC_peak21816	27.9972	chr16:10	1.62214	GRIN2A	26.375	ATAC > CNV	De novo increase
chr13	31982575	31982861	0.0470618	0.00247438	mergeATAC_peak15951	27.3708	chr13:31	1.00536	.	26.3654	ATAC > CNV	De novo increase
chr1	8911523	8911700	0.0470618	0.00247438	mergeATAC_peak335	27.7539	chr1:8	1.41484	.	26.339	ATAC > CNV	De novo increase
chr5	39236762	39236980	0.0244133	0.000796517	mergeATAC_peak46929	27.5053	chr5:39	1.19353	.	26.3118	ATAC > CNV	De novo increase
chr1	234898742	234898901	0.0344199	0.00140291	mergeATAC_peak6479	28.3727	chr1:234	2.07983	.	26.2929	ATAC > CNV	De novo increase
chr16	49851494	49851646	0.0470618	0.00247438	mergeATAC_peak22701	27.7718	chr16:49	1.58855	.	26.1833	ATAC > CNV	De novo increase
chr1	150678837	150679102	0.0244133	0.000796517	mergeATAC_peak3624	28.8359	chr1:150	2.6685	.	26.1674	ATAC > CNV	De novo increase
chr1	150624108	150624577	3.48893e-10	2.17557e-13	mergeATAC_peak3617	28.7938	chr1:150	2.6685	.	26.1253	ATAC > CNV	De novo increase
chr7	1559030	1559317	0.0244133	0.000796517	mergeATAC_peak54482	27.326	chr7:1	1.24522	.	26.0807	ATAC > CNV	De novo increase
chr1	178655766	178655974	0.0470618	0.00247438	mergeATAC_peak4752	27.3642	chr1:178	1.35692	.	26.0072	ATAC > CNV	De novo increase
chr5	52997011	52997244	0.0470618	0.00247438	mergeATAC_peak47119	27.2463	chr5:52	1.24023	.	26.0061	ATAC > CNV	De novo increase
chr17	6808006	6808304	0.0344199	0.00140291	mergeATAC_peak24200	27.0149	chr17:6	1.03181	.	25.9831	ATAC > CNV	De novo increase
chr2	42249896	42250158	0.0172708	0.000452581	mergeATAC_peak31964	27.0411	chr2:42	1.20358	.	25.8376	ATAC > CNV	De novo increase
chr6	3139284	3139605	0.0344199	0.00140291	mergeATAC_peak49927	27.2585	chr6:3	1.51145	BPHL	25.747	ATAC > CNV	De novo increase
chr16	17070826	17071068	0.0244133	0.000796517	mergeATAC_peak22047	27.3491	chr16:17	1.71228	.	25.6368	ATAC > CNV	De novo increase
chr21	32406563	32406732	0.0344199	0.00140291	mergeATAC_peak37720	27.1303	chr21:32	1.57276	.	25.5576	ATAC > CNV	De novo increase
chr1	224483267	224483598	0.0470618	0.00247438	mergeATAC_peak6091	26.9335	chr1:224	1.41159	.	25.5219	ATAC > CNV	De novo increase
chr17	72597672	72597946	0.0470618	0.00247438	mergeATAC_peak26659	26.5336	chr17:72	1.02166	.	25.512	ATAC > CNV	De novo increase
chr9	124559898	124560201	0.0344199	0.00140291	mergeATAC_peak63941	26.8243	chr9:124	1.32857	.	25.4957	ATAC > CNV	De novo increase
chr5	3187937	3188237	0.0470618	0.00247438	mergeATAC_peak46374	26.5189	chr5:3	1.07241	.	25.4465	ATAC > CNV	De novo increase
chr8	143760806	143760974	0.0470618	0.00247438	mergeATAC_peak61510	28.6764	chr8:143	3.23947	.	25.4369	ATAC > CNV	De novo increase
chr8	115789141	115789290	0.0470618	0.00247438	mergeATAC_peak60438	29.94	chr8:115	4.57805	.	25.362	ATAC > CNV	De novo increase
chr7	23045419	23045585	0.0470618	0.00247438	mergeATAC_peak55056	26.4148	chr7:23	1.27098	.	25.1438	ATAC > CNV	De novo increase
chr6	89987874	89988170	0.0470618	0.00247438	mergeATAC_peak52490	26.1798	chr6:89	1.44211	.	24.7377	ATAC > CNV	De novo increase
chr1	245245371	245245591	0.0470618	0.00247438	mergeATAC_peak6727	26.0219	chr1:245	1.29623	.	24.7257	ATAC > CNV	De novo increase
chr8	97610075	97610224	0.0470618	0.00247438	mergeATAC_peak59837	27.0398	chr8:97	2.43075	.	24.609	ATAC > CNV	De novo increase
chr6	155000266	155000673	0.000887719	6.49409e-06	mergeATAC_peak53926	25.8739	chr6:155	1.2782	.	24.5957	ATAC > CNV	De novo increase
chr13	99829526	99829824	0.0470618	0.00247438	mergeATAC_peak16926	26.1774	chr13:99	1.5973	.	24.5801	ATAC > CNV	De novo increase
chr20	57210127	57210315	0.0470618	0.00247438	mergeATAC_peak37142	26.1006	chr20:57	1.55855	.	24.5421	ATAC > CNV	De novo increase
chr9	116856304	116856682	0.00319782	3.62819e-05	mergeATAC_peak63743	25.8102	chr9:116	1.38111	.	24.4291	ATAC > CNV	De novo increase
chr8	116618165	116618532	0.0470618	0.00247438	mergeATAC_peak60455	26.4434	chr8:116	2.13544	.	24.3079	ATAC > CNV	De novo increase
chr2	119218863	119219019	0.0470618	0.00247438	mergeATAC_peak33480	25.486	chr2:119	1.37593	.	24.1101	ATAC > CNV	De novo increase
chr9	136698306	136698462	0.0344199	0.00140291	mergeATAC_peak64555	25.6236	chr9:136	1.54391	.	24.0797	ATAC > CNV	De novo increase
chr17	57358230	57358436	0.0244133	0.000796517	mergeATAC_peak26138	25.6508	chr17:57	1.57139	.	24.0794	ATAC > CNV	De novo increase
chr20	54267403	54267643	0.0470618	0.00247438	mergeATAC_peak37099	24.9098	chr20:54	1.05804	.	23.8518	ATAC > CNV	De novo increase
chr5	157842922	157843114	0.0470618	0.00247438	mergeATAC_peak49124	25.4052	chr5:157	1.65558	.	23.7496	ATAC > CNV	De novo increase
chr6	162436296	162436536	0.0470618	0.00247438	mergeATAC_peak54155	25.019	chr6:162	1.30004	.	23.7189	ATAC > CNV	De novo increase
chr6	53203524	53203753	0.0344199	0.00140291	mergeATAC_peak51837	25.4786	chr6:53	1.76154	.	23.7171	ATAC > CNV	De novo increase
chr8	127810094	127810604	1.73813e-06	3.75377e-09	mergeATAC_peak60897	27.4916	chr8:127	3.79706	.	23.6946	ATAC > CNV	De novo increase
chr16	19696510	19696679	0.0470618	0.00247438	mergeATAC_peak22122	25.2336	chr16:19	1.63973	.	23.5939	ATAC > CNV	De novo increase
chr1	244454450	244454807	6.62918e-10	4.33537e-13	mergeATAC_peak6691	25.2961	chr1:244	2.01739	CATSPERE	23.2787	ATAC > CNV	De novo increase
chr16	85707777	85708070	0.0470618	0.00247438	mergeATAC_peak23684	24.2579	chr16:85	1.05322	.	23.2046	ATAC > CNV	De novo increase
chr6	109344312	109344598	0.0470618	0.00247438	mergeATAC_peak52816	24.2069	chr6:109	1.00242	CCDC162P	23.2045	ATAC > CNV	De novo increase
chr8	98973792	98973941	0.0470618	0.00247438	mergeATAC_peak59899	28.0356	chr8:98	5.38308	.	22.6525	ATAC > CNV	De novo increase
chr1	228412567	228413031	0.00141376	1.1869e-05	mergeATAC_peak6256	24.4724	chr1:228	1.85919	.	22.6132	ATAC > CNV	De novo increase
chr5	151599042	151599306	0.0148684	0.000345981	mergeATAC_peak48979	23.8067	chr5:151	1.43376	.	22.373	ATAC > CNV	De novo increase
chr8	139919349	139919523	0.0470618	0.00247438	mergeATAC_peak61286	25.8381	chr8:139	3.67788	.	22.1603	ATAC > CNV	De novo increase
chr8	130897607	130897765	0.0244133	0.000796517	mergeATAC_peak61009	26.5994	chr8:130	4.50571	.	22.0937	ATAC > CNV	De novo increase
chr9	135218709	135218909	0.0470618	0.00247438	mergeATAC_peak64481	23.0786	chr9:135	1.14872	.	21.9299	ATAC > CNV	De novo increase
chr19	36115699	36115958	0.0244133	0.000796517	mergeATAC_peak30013	23.494	chr19:36	1.6655	TBCB;POLR2I	21.8285	ATAC > CNV	De novo increase
chr21	15706704	15707043	9.15859e-05	3.91411e-07	mergeATAC_peak37438	23.4785	chr21:15	1.73675	.	21.7417	ATAC > CNV	De novo increase
chr8	116298120	116298269	0.0470618	0.00247436	mergeATAC_peak60443	23.877	chr8:116	2.13544	.	21.7415	ATAC > CNV	De novo increase
chr4	173001703	173001903	0.0470618	0.00247438	mergeATAC_peak45982	22.9971	chr4:173	1.37574	.	21.6214	ATAC > CNV	De novo increase
chr8	115207670	115208102	0.000581803	3.85798e-06	mergeATAC_peak60427	26.01	chr8:115	4.57805	.	21.432	ATAC > CNV	De novo increase
chr6	158245749	158246082	0.00325676	3.72973e-05	mergeATAC_peak54023	23.1214	chr6:158	2.04724	.	21.0742	ATAC > CNV	De novo increase
chr8	114637030	114637271	7.98331e-08	1.03205e-10	mergeATAC_peak60417	27.8171	chr8:114	7.06545	.	20.7517	ATAC > CNV	De novo increase
chr8	137117297	137117638	0.000581803	3.85798e-06	mergeATAC_peak61209	26.0364	chr8:137	5.43939	.	20.597	ATAC > CNV	De novo increase
chr8	143936527	143936856	2.07434e-05	6.82362e-08	mergeATAC_peak61525	23.6469	chr8:143	3.23947	.	20.4074	ATAC > CNV	De novo increase
chr4	155693654	155693816	0.0470618	0.00247438	mergeATAC_peak45749	21.4431	chr4:155	1.11479	.	20.3283	ATAC > CNV	De novo increase
chr6	155024672	155024927	0.0470618	0.00247438	mergeATAC_peak53928	21.4854	chr6:155	1.2782	.	20.2072	ATAC > CNV	De novo increase
chr10	105706660	105706983	0.0470618	0.00247438	mergeATAC_peak8914	21.2618	chr10:105	1.06381	.	20.198	ATAC > CNV	De novo increase
chr8	136237563	136237867	0.000143364	6.95549e-07	mergeATAC_peak61198	25.7963	chr8:136	5.87389	.	19.9224	ATAC > CNV	De novo increase
chr1	167820138	167820465	0.000372246	2.22495e-06	mergeATAC_peak4455	21.6213	chr1:167	1.8505	ENSG00000250762;ENSG00000232194	19.7708	ATAC > CNV	De novo increase
chr8	133968246	133968606	2.87013e-06	6.85328e-09	mergeATAC_peak61114	25.8778	chr8:133	6.19438	.	19.6835	ATAC > CNV	De novo increase
chr17	19521356	19521730	5.88789e-05	2.28348e-07	mergeATAC_peak24723	20.9544	chr17:19	1.29784	.	19.6566	ATAC > CNV	De novo increase
chr8	143038798	143039053	0.00700271	0.000114385	mergeATAC_peak61447	22.6052	chr8:143	3.23947	LINC02904	19.3658	ATAC > CNV	De novo increase
chr8	138584279	138584525	2.87013e-06	6.85328e-09	mergeATAC_peak61241	24.8264	chr8:138	5.52961	.	19.2967	ATAC > CNV	De novo increase
chr17	960729	961121	2.16994e-05	7.22751e-08	mergeATAC_peak23898	20.5788	chr17:0	1.31121	.	19.2676	ATAC > CNV	De novo increase
chr5	172925315	172925738	5.88789e-05	2.28348e-07	mergeATAC_peak49497	21.3191	chr5:172	2.23566	.	19.0834	ATAC > CNV	De novo increase
chr17	27554284	27554463	0.0470618	0.00247438	mergeATAC_peak24846	21.2528	chr17:27	2.21473	.	19.038	ATAC > CNV	De novo increase
chr8	104366528	104366987	6.4432e-07	1.18573e-09	mergeATAC_peak60179	23.269	chr8:104	4.25877	.	19.0102	ATAC > CNV	De novo increase
chr1	165456209	165456425	0.0432923	0.0018831	mergeATAC_peak4378	21.2108	chr1:165	2.36698	.	18.8438	ATAC > CNV	De novo increase
chr6	33743907	33744072	0.0470618	0.00247438	mergeATAC_peak51126	20.2706	chr6:33	1.70976	.	18.5609	ATAC > CNV	De novo increase
chr8	123516989	123517321	0.0436143	0.00189977	mergeATAC_peak60680	20.3613	chr8:123	1.87538	.	18.486	ATAC > CNV	De novo increase
chr6	106758133	106758472	0.000164668	8.28963e-07	mergeATAC_peak52733	20.1492	chr6:106	1.70797	.	18.4412	ATAC > CNV	De novo increase
chr8	133428511	133428918	3.40334e-05	1.23191e-07	mergeATAC_peak61081	24.3979	chr8:133	6.19438	.	18.2035	ATAC > CNV	De novo increase
chr17	79711805	79712219	0.000943755	6.99692e-06	mergeATAC_peak27072	19.5	chr17:79	1.31328	.	18.1867	ATAC > CNV	De novo increase
chr22	20654728	20655212	0.00489579	6.65668e-05	mergeATAC_peak38526	19.4936	chr22:20	1.33241	.	18.1612	ATAC > CNV	De novo increase
chr5	178124149	178124702	8.26589e-14	1.25715e-17	mergeATAC_peak49677	21.2856	chr5:178	3.15196	.	18.1337	ATAC > CNV	De novo increase
chr9	135204267	135204621	0.00221056	2.14497e-05	mergeATAC_peak64478	19.227	chr9:135	1.14872	.	18.0783	ATAC > CNV	De novo increase
chr8	102986699	102986848	0.0470618	0.00247438	mergeATAC_peak60146	22.7591	chr8:102	4.68451	.	18.0746	ATAC > CNV	De novo increase
chr8	139956950	139957376	0.000228952	1.24525e-06	mergeATAC_peak61288	21.738	chr8:139	3.67788	.	18.0601	ATAC > CNV	De novo increase
chr5	74636608	74636951	0.000157705	7.89115e-07	mergeATAC_peak47528	19.0378	chr5:74	1.07234	.	17.9655	ATAC > CNV	De novo increase
chr2	9787044	9787282	0.0306487	0.00107125	mergeATAC_peak31276	19.0523	chr2:9	1.11865	.	17.9336	ATAC > CNV	De novo increase
chr1	212725410	212725621	0.0310514	0.00109044	mergeATAC_peak5799	19.5124	chr1:212	1.69107	.	17.8213	ATAC > CNV	De novo increase
chr8	141028590	141028972	0.000228952	1.25704e-06	mergeATAC_peak61335	21.8611	chr8:141	4.07364	.	17.7875	ATAC > CNV	De novo increase
chr21	27710469	27710727	0.00492497	6.71777e-05	mergeATAC_peak37595	19.0095	chr21:27	1.44672	.	17.5628	ATAC > CNV	De novo increase
chr5	176660871	176661088	0.000592915	3.96773e-06	mergeATAC_peak49599	18.9518	chr5:176	1.49745	.	17.4543	ATAC > CNV	De novo increase
chr21	33189295	33189750	0.000381619	2.31e-06	mergeATAC_peak37758	18.9209	chr21:33	1.50131	.	17.4196	ATAC > CNV	De novo increase
chr5	176199147	176199466	0.0215725	0.000614519	mergeATAC_peak49573	18.9003	chr5:176	1.49745	ENSG00000283235	17.4029	ATAC > CNV	De novo increase
chr8	139386994	139387291	0.00014474	7.0883e-07	mergeATAC_peak61270	21.0371	chr8:139	3.67788	.	17.3592	ATAC > CNV	De novo increase
chr8	101653478	101653779	0.00145143	1.23176e-05	mergeATAC_peak60060	22.453	chr8:101	5.18747	.	17.2656	ATAC > CNV	De novo increase
chr7	106443189	106443521	0.00325676	3.72973e-05	mergeATAC_peak57054	18.9449	chr7:106	1.80679	.	17.1382	ATAC > CNV	De novo increase
chr8	134743649	134744036	2.88182e-08	3.19954e-11	mergeATAC_peak61143	23.5758	chr8:134	6.53886	.	17.037	ATAC > CNV	De novo increase
chr8	123541678	123541955	0.01061	0.000205441	mergeATAC_peak60685	18.9011	chr8:123	1.87538	FBXO32	17.0257	ATAC > CNV	De novo increase
chr8	129996673	129997024	0.000228952	1.25704e-06	mergeATAC_peak60985	21.6593	chr8:129	4.64042	.	17.0188	ATAC > CNV	De novo increase
chr5	96657185	96657440	0.0306487	0.00107125	mergeATAC_peak47887	18.1663	chr5:96	1.1718	.	16.9945	ATAC > CNV	De novo increase
chr7	99829681	99829935	0.00327379	3.76418e-05	mergeATAC_peak56775	18.5933	chr7:99	1.64852	.	16.9448	ATAC > CNV	De novo increase
chr8	123241089	123241537	0.00327379	3.76418e-05	mergeATAC_peak60668	18.7122	chr8:123	1.87538	C8orf76	16.8368	ATAC > CNV	De novo increase
chr8	115103075	115103372	0.000225476	1.21052e-06	mergeATAC_peak60424	21.3939	chr8:115	4.57805	.	16.8159	ATAC > CNV	De novo increase
chr17	78497176	78497402	0.00492497	6.71781e-05	mergeATAC_peak27017	18.3247	chr17:78	1.52407	DNAH17-AS1	16.8007	ATAC > CNV	De novo increase
chr8	133919352	133919995	1.26399e-11	4.99821e-15	mergeATAC_peak61110	22.6753	chr8:133	6.19438	.	16.4809	ATAC > CNV	De novo increase
chr5	155735470	155735755	0.00486756	6.59609e-05	mergeATAC_peak49088	18.484	chr5:155	2.01986	.	16.4642	ATAC > CNV	De novo increase
chr1	161595683	161596061	0.00023048	1.26893e-06	mergeATAC_peak4283	19.1034	chr1:161	2.73056	FCGR2C	16.3728	ATAC > CNV	De novo increase
chr8	139196609	139197029	0.000590081	3.93082e-06	mergeATAC_peak61263	20.0489	chr8:139	3.67788	.	16.371	ATAC > CNV	De novo increase
chr9	112012291	112012683	0.0310514	0.00109044	mergeATAC_peak63553	17.9697	chr9:112	1.73764	.	16.2321	ATAC > CNV	De novo increase
chr1	170882003	170882202	0.00729344	0.000120797	mergeATAC_peak4552	17.5105	chr1:170	1.30154	.	16.2089	ATAC > CNV	De novo increase
chr7	106692510	106692995	0.00219714	2.12526e-05	mergeATAC_peak57067	17.9352	chr7:106	1.80679	.	16.1284	ATAC > CNV	De novo increase
chr8	140114613	140115027	0.00144321	1.2204e-05	mergeATAC_peak61294	19.5035	chr8:140	3.56306	.	15.9404	ATAC > CNV	De novo increase
chr15	45863821	45864185	0.021743	0.000620038	mergeATAC_peak19811	17.2261	chr15:45	1.29502	.	15.9311	ATAC > CNV	De novo increase
chr8	140831165	140831396	0.000377376	2.26709e-06	mergeATAC_peak61329	19.4472	chr8:140	3.56306	.	15.8841	ATAC > CNV	De novo increase
chr8	128127803	128128182	3.25353e-08	3.7112e-11	mergeATAC_peak60918	20.2257	chr8:128	4.36839	.	15.8573	ATAC > CNV	De novo increase
chr5	5136012	5136446	0.00498867	6.90434e-05	mergeATAC_peak46398	17.088	chr5:5	1.35198	.	15.736	ATAC > CNV	De novo increase
chr7	48025684	48025938	0.00729344	0.000120797	mergeATAC_peak55697	17.296	chr7:48	1.62379	.	15.6722	ATAC > CNV	De novo increase
chr6	45477157	45477559	6.84667e-05	2.71475e-07	mergeATAC_peak51632	16.7985	chr6:45	1.21325	.	15.5852	ATAC > CNV	De novo increase
chr17	40956806	40957163	1.39582e-05	4.11215e-08	mergeATAC_peak25379	17.4346	chr17:40	1.87943	.	15.5552	ATAC > CNV	De novo increase
chr9	129737969	129738167	0.0154216	0.000361903	mergeATAC_peak64237	16.6979	chr9:129	1.43556	.	15.2623	ATAC > CNV	De novo increase
chr8	141043415	141043625	0.0150795	0.000352271	mergeATAC_peak61339	19.2838	chr8:141	4.07364	.	15.2102	ATAC > CNV	De novo increase
chr5	149493247	149493606	0.000975606	7.32992e-06	mergeATAC_peak48880	16.2213	chr5:149	1.26261	.	14.9587	ATAC > CNV	De novo increase
chr7	27737628	27737877	0.0312199	0.00110016	mergeATAC_peak55178	16.142	chr7:27	1.21837	.	14.9237	ATAC > CNV	De novo increase
chr21	36210088	36210399	0.000958482	7.12837e-06	mergeATAC_peak37868	16.3262	chr21:36	1.46781	.	14.8584	ATAC > CNV	De novo increase
chr6	168029745	168030170	3.76423e-05	1.36827e-07	mergeATAC_peak54290	16.3665	chr6:168	1.5192	KIF25	14.8473	ATAC > CNV	De novo increase
chr8	101891830	101892230	2.26435e-09	1.79079e-12	mergeATAC_peak60072	19.9842	chr8:101	5.18747	.	14.7968	ATAC > CNV	De novo increase
chr5	155546049	155546440	0.00329529	3.79892e-05	mergeATAC_peak49082	16.7889	chr5:155	2.01986	.	14.769	ATAC > CNV	De novo increase
chr1	107936540	107936749	0.00336952	3.905e-05	mergeATAC_peak2797	16.3259	chr1:107	1.78456	.	14.5414	ATAC > CNV	De novo increase
chr1	108516949	108517312	0.000592915	3.96773e-06	mergeATAC_peak2807	16.028	chr1:108	1.60047	.	14.4276	ATAC > CNV	De novo increase
chr5	163379587	163379984	4.11857e-05	1.50333e-07	mergeATAC_peak49280	17.7151	chr5:163	3.35056	.	14.3645	ATAC > CNV	De novo increase
chr13	89554841	89555208	0.0441574	0.00193349	mergeATAC_peak16697	15.2875	chr13:89	1.12459	.	14.1629	ATAC > CNV	De novo increase
chr16	25045156	25045362	0.0315601	0.00111983	mergeATAC_peak22292	15.5638	chr16:25	1.47725	.	14.0866	ATAC > CNV	De novo increase
chr20	57326681	57327113	0.0155171	0.000365169	mergeATAC_peak37144	15.6204	chr20:57	1.55855	.	14.0619	ATAC > CNV	De novo increase
chr7	154339631	154339926	0.00494436	6.77946e-05	mergeATAC_peak58093	15.255	chr7:154	1.23352	.	14.0215	ATAC > CNV	De novo increase
chr1	234785469	234785877	0.00714988	0.000117549	mergeATAC_peak6466	16.0664	chr1:234	2.07983	.	13.9866	ATAC > CNV	De novo increase
chr1	109096225	109096431	0.00710487	0.000116486	mergeATAC_peak2834	16.7986	chr1:109	2.87466	.	13.9239	ATAC > CNV	De novo increase
chr6	31945804	31946127	0.043908	0.00191656	mergeATAC_peak50975	15.921	chr6:31	2.0466	CFB	13.8744	ATAC > CNV	De novo increase
chr5	180353308	180353606	0.00231823	2.3091e-05	mergeATAC_peak49764	16.143	chr5:180	2.38985	GFPT2	13.7532	ATAC > CNV	De novo increase
chr16	1102940	1103115	0.0220526	0.000631216	mergeATAC_peak21412	15.1061	chr16:1	1.35645	.	13.7496	ATAC > CNV	De novo increase
chr8	104278421	104278890	0.000607199	4.11873e-06	mergeATAC_peak60175	17.9709	chr8:104	4.25877	.	13.7121	ATAC > CNV	De novo increase
chr17	77472002	77472325	0.000152985	7.6084e-07	mergeATAC_peak26960	15.0408	chr17:77	1.41608	ENSG00000267016	13.6247	ATAC > CNV	De novo increase
chr21	17742224	17742526	0.000665888	4.59785e-06	mergeATAC_peak37494	15.7213	chr21:17	2.17239	.	13.5489	ATAC > CNV	De novo increase
chr9	28213017	28213273	0.0441574	0.00193349	mergeATAC_peak62038	14.5507	chr9:28	1.01228	.	13.5384	ATAC > CNV	De novo increase
chr5	160467673	160467931	0.0223428	0.000642581	mergeATAC_peak49237	16.3589	chr5:160	2.86412	MIR3142HG	13.4947	ATAC > CNV	De novo increase
chr6	73881945	73882210	0.043908	0.00191656	mergeATAC_peak52165	14.9082	chr6:73	1.45409	.	13.4541	ATAC > CNV	De novo increase
chr7	91249820	91250163	0.0108261	0.000211086	mergeATAC_peak56532	15.1543	chr7:91	1.75136	.	13.4029	ATAC > CNV	De novo increase
chr1	181134953	181135291	0.000978765	7.39831e-06	mergeATAC_peak4837	15.1428	chr1:181	1.74807	.	13.3947	ATAC > CNV	De novo increase
chr6	11318359	11318723	0.00373791	4.50817e-05	mergeATAC_peak50171	15.0714	chr6:11	1.75202	.	13.3193	ATAC > CNV	De novo increase
chr8	128343942	128344420	2.38135e-09	1.95576e-12	mergeATAC_peak60939	17.6314	chr8:128	4.36839	.	13.263	ATAC > CNV	De novo increase
chr15	98823121	98823492	0.0314165	0.00110995	mergeATAC_peak21218	14.682	chr15:98	1.46095	.	13.221	ATAC > CNV	De novo increase
chr16	47611031	47611556	0.00729344	0.000120797	mergeATAC_peak22644	14.1886	chr16:47	1.01081	.	13.1778	ATAC > CNV	De novo increase
chr3	184011161	184011687	0.00714988	0.00011755	mergeATAC_peak42980	14.1869	chr3:184	1.02269	.	13.1642	ATAC > CNV	De novo increase
chr16	29285103	29285534	0.00714988	0.00011755	mergeATAC_peak22404	14.3282	chr16:29	1.20858	.	13.1197	ATAC > CNV	De novo increase
chr13	83881942	83882208	0.0220526	0.000631216	mergeATAC_peak16656	14.271	chr13:83	1.23312	SLITRK1;ENSG00000285680	13.0379	ATAC > CNV	De novo increase
chr12	110060101	110060570	0.0155799	0.000368461	mergeATAC_peak14976	14.0496	chr12:110	1.01499	C12orf76	13.0346	ATAC > CNV	De novo increase
chr11	65296162	65296679	0.0156498	0.000371782	mergeATAC_peak10987	14.7298	chr11:65	1.69585	.	13.034	ATAC > CNV	De novo increase
chr17	41413375	41413787	0.000154692	7.71684e-07	mergeATAC_peak25393	14.5253	chr17:41	1.49656	.	13.0288	ATAC > CNV	De novo increase
chr8	98799532	98799867	0.000259901	1.46649e-06	mergeATAC_peak59885	18.3975	chr8:98	5.38308	.	13.0144	ATAC > CNV	De novo increase
chr11	67548874	67549084	0.0154216	0.000361903	mergeATAC_peak11145	14.0092	chr11:67	1.14645	.	12.8627	ATAC > CNV	De novo increase
chr5	74149458	74149779	0.00505827	7.03142e-05	mergeATAC_peak47509	13.9316	chr5:74	1.07234	.	12.8592	ATAC > CNV	De novo increase
chr21	28247455	28248026	0.000168888	8.70753e-07	mergeATAC_peak37615	14.7685	chr21:28	1.91455	.	12.854	ATAC > CNV	De novo increase
chr17	18992834	18993185	0.00729344	0.000120797	mergeATAC_peak24703	13.887	chr17:18	1.2526	.	12.6344	ATAC > CNV	De novo increase
chr4	11614570	11614731	0.0444615	0.00196777	mergeATAC_peak43726	13.6294	chr4:11	1.07483	.	12.5546	ATAC > CNV	De novo increase
chr9	95499810	95500205	0.0108903	0.000213	mergeATAC_peak63145	13.5847	chr9:95	1.05944	.	12.5252	ATAC > CNV	De novo increase
chr11	134258575	134258968	0.00231795	2.28795e-05	mergeATAC_peak12613	13.4998	chr11:134	1.02896	ACAD8	12.4708	ATAC > CNV	De novo increase
chr8	98866232	98866381	0.00494436	6.77946e-05	mergeATAC_peak59894	17.8301	chr8:98	5.38308	.	12.447	ATAC > CNV	De novo increase
chr8	73341033	73341367	0.00731959	0.000121899	mergeATAC_peak59505	13.4153	chr8:73	1.04119	.	12.3741	ATAC > CNV	De novo increase
chr17	28973456	28973700	0.0442552	0.00195056	mergeATAC_peak24933	14.1209	chr17:28	1.77546	.	12.3455	ATAC > CNV	De novo increase
chr1	174968798	174969020	0.0442552	0.00195056	mergeATAC_peak4675	13.4251	chr1:174	1.18376	.	12.2414	ATAC > CNV	De novo increase
chr6	1287093	1287674	0.000112844	5.11438e-07	mergeATAC_peak49847	13.5217	chr6:1	1.31033	.	12.2114	ATAC > CNV	De novo increase
chr8	126536462	126536864	2.26597e-05	7.58184e-08	mergeATAC_peak60840	15.7633	chr8:126	3.59075	.	12.1726	ATAC > CNV	De novo increase
chr8	123274767	123275132	0.0222149	0.000636875	mergeATAC_peak60669	14.0216	chr8:123	1.87538	ZHX1;ZHX1-C8orf76	12.1462	ATAC > CNV	De novo increase
chr8	101051376	101052323	6.09731e-12	1.76193e-15	mergeATAC_peak60009	17.2454	chr8:101	5.18747	FLJ42969	12.058	ATAC > CNV	De novo increase
chr8	133889911	133890122	0.00143505	1.20913e-05	mergeATAC_peak61108	18.2307	chr8:133	6.19438	.	12.0363	ATAC > CNV	De novo increase
chr20	53647325	53647625	0.000983933	7.4673e-06	mergeATAC_peak37049	13.5549	chr20:53	1.54604	.	12.0088	ATAC > CNV	De novo increase
chr8	104289333	104289614	0.01061	0.000205441	mergeATAC_peak60176	16.2653	chr8:104	4.25877	.	12.0065	ATAC > CNV	De novo increase
chr8	133928873	133929356	6.09227e-05	2.37201e-07	mergeATAC_peak61111	18.0243	chr8:133	6.19438	.	11.8299	ATAC > CNV	De novo increase
chr17	45047277	45047606	0.00726085	0.000119706	mergeATAC_peak25663	13.2836	chr17:45	1.46347	.	11.8202	ATAC > CNV	De novo increase
chr1	183699583	183700281	0.00152938	1.3142e-05	mergeATAC_peak4925	12.9591	chr1:183	1.24143	.	11.7176	ATAC > CNV	De novo increase
chr6	106799679	106799889	0.00231069	2.26698e-05	mergeATAC_peak52742	13.4214	chr6:106	1.70797	.	11.7135	ATAC > CNV	De novo increase
chr17	1060974	1061336	2.70724e-05	9.26419e-08	mergeATAC_peak23909	13.1582	chr17:1	1.4726	.	11.6856	ATAC > CNV	De novo increase
chr19	1213849	1214119	0.0442552	0.00195056	mergeATAC_peak28771	12.6851	chr19:1	1.01171	.	11.6734	ATAC > CNV	De novo increase
chr8	127854051	127854492	0.000978765	7.39831e-06	mergeATAC_peak60899	15.4398	chr8:127	3.79706	PVT1	11.6427	ATAC > CNV	De novo increase
chr8	143573130	143573314	0.00731959	0.000121899	mergeATAC_peak61488	14.8684	chr8:143	3.23947	MROH6;ENSG00000255050	11.629	ATAC > CNV	De novo increase
chr8	139340958	139341177	0.0015067	1.29013e-05	mergeATAC_peak61268	15.2964	chr8:139	3.67788	.	11.6186	ATAC > CNV	De novo increase
chr17	28658376	28658607	0.0312199	0.00110016	mergeATAC_peak24907	13.3508	chr17:28	1.77546	SDF2	11.5753	ATAC > CNV	De novo increase
chr1	160726887	160727121	0.0223428	0.000642581	mergeATAC_peak4194	13.6801	chr1:160	2.11608	.	11.564	ATAC > CNV	De novo increase
chr8	138570298	138570655	2.55654e-07	4.1547e-10	mergeATAC_peak61237	17.0707	chr8:138	5.52961	.	11.5411	ATAC > CNV	De novo increase
chr1	161378119	161378355	0.0315601	0.00111983	mergeATAC_peak4255	14.2689	chr1:161	2.73056	.	11.5383	ATAC > CNV	De novo increase
chr2	20129257	20129543	0.0155171	0.000365169	mergeATAC_peak31481	13.1193	chr2:20	1.61876	.	11.5005	ATAC > CNV	De novo increase
chr8	101388227	101388536	1.88284e-08	1.97588e-11	mergeATAC_peak60026	16.679	chr8:101	5.18747	.	11.4916	ATAC > CNV	De novo increase
chr6	95974016	95974331	0.00342749	4.01388e-05	mergeATAC_peak52546	12.9853	chr6:95	1.49605	.	11.4893	ATAC > CNV	De novo increase
chr9	126398541	126398764	0.0155799	0.000368461	mergeATAC_peak64008	12.6528	chr9:126	1.21681	.	11.436	ATAC > CNV	De novo increase
chr1	234618438	234618787	0.00505827	7.03146e-05	mergeATAC_peak6450	13.5142	chr1:234	2.07983	.	11.4344	ATAC > CNV	De novo increase
chr20	53621510	53621822	0.0442552	0.00195056	mergeATAC_peak37047	12.9447	chr20:53	1.54604	.	11.3986	ATAC > CNV	De novo increase
chr9	111891916	111892433	3.97616e-06	9.8571e-09	mergeATAC_peak63542	12.8012	chr9:111	1.40682	.	11.3943	ATAC > CNV	De novo increase
chr1	204448512	204448858	0.00502335	6.96764e-05	mergeATAC_peak5408	12.6718	chr1:204	1.28473	.	11.3871	ATAC > CNV	De novo increase
chr20	53906164	53906773	1.63003e-05	5.10695e-08	mergeATAC_peak37077	12.9206	chr20:53	1.54604	.	11.3745	ATAC > CNV	De novo increase
chr11	65146171	65146445	0.00731959	0.000121899	mergeATAC_peak10975	13.07	chr11:65	1.69585	HIGD1AP10	11.3741	ATAC > CNV	De novo increase
chr1	204417174	204417330	0.0441574	0.00193349	mergeATAC_peak5404	12.5943	chr1:204	1.28473	.	11.3096	ATAC > CNV	De novo increase
chr5	178778886	178779276	0.0442552	0.00195056	mergeATAC_peak49710	14.4161	chr5:178	3.15196	.	11.2641	ATAC > CNV	De novo increase
chr1	223870941	223871372	0.0317048	0.00112978	mergeATAC_peak6060	13.0692	chr1:223	1.8162	.	11.253	ATAC > CNV	De novo increase
chr8	102231320	102231723	0.000964969	7.19496e-06	mergeATAC_peak60088	15.8758	chr8:102	4.68451	.	11.1913	ATAC > CNV	De novo increase
chr17	35142246	35142481	0.00742642	0.000124129	mergeATAC_peak25075	12.4148	chr17:35	1.22974	NLE1	11.1851	ATAC > CNV	De novo increase
chr20	53582963	53583330	1.79306e-05	5.69952e-08	mergeATAC_peak37040	12.7285	chr20:53	1.54604	ZNF217	11.1825	ATAC > CNV	De novo increase
chr8	127800771	127801165	1.53309e-09	1.14251e-12	mergeATAC_peak60894	14.9686	chr8:127	3.79706	.	11.1716	ATAC > CNV	De novo increase
chr17	63774098	63774344	0.0107624	0.000209188	mergeATAC_peak26373	12.4602	chr17:63	1.32444	DDX42;CCDC47	11.1358	ATAC > CNV	De novo increase
chr16	32932805	32932990	0.0444615	0.00196777	mergeATAC_peak22592	12.3109	chr16:32	1.19024	ENSG00000260610	11.1206	ATAC > CNV	De novo increase
chr8	123630413	123630708	0.0436143	0.00189977	mergeATAC_peak60687	12.9877	chr8:123	1.87538	.	11.1123	ATAC > CNV	De novo increase
chr1	150996026	150996253	0.00337995	3.94098e-05	mergeATAC_peak3642	13.7681	chr1:150	2.6685	.	11.0996	ATAC > CNV	De novo increase
chr6	31795931	31796254	0.0155171	0.000365169	mergeATAC_peak50957	13.1427	chr6:31	2.0466	VARS1	11.0961	ATAC > CNV	De novo increase
chr7	5888170	5888517	0.044831	0.00202024	mergeATAC_peak54633	12.2772	chr7:5	1.22893	.	11.0483	ATAC > CNV	De novo increase
chr8	102972181	102972441	0.000242522	1.34261e-06	mergeATAC_peak60145	15.6375	chr8:102	4.68451	.	10.953	ATAC > CNV	De novo increase
chr16	12075660	12075931	0.0155799	0.000368461	mergeATAC_peak21935	12.2112	chr16:12	1.27969	.	10.9315	ATAC > CNV	De novo increase
chr17	2900024	2900369	0.00502335	6.96764e-05	mergeATAC_peak24046	12.4212	chr17:2	1.49131	.	10.9299	ATAC > CNV	De novo increase
chr12	116651096	116651424	0.0442552	0.00195056	mergeATAC_peak15129	11.8437	chr12:116	1.10403	.	10.7397	ATAC > CNV	De novo increase
chr17	45440106	45440515	0.00231823	2.33043e-05	mergeATAC_peak25708	12.1995	chr17:45	1.46347	PLEKHM1	10.736	ATAC > CNV	De novo increase
chr6	168370335	168370568	0.0157706	0.00037513	mergeATAC_peak54315	12.2184	chr6:168	1.5192	.	10.6992	ATAC > CNV	De novo increase
chr17	19538935	19539090	0.0442552	0.00195056	mergeATAC_peak24727	11.956	chr17:19	1.29784	.	10.6582	ATAC > CNV	De novo increase
chr3	177580505	177580776	0.0315601	0.00111983	mergeATAC_peak42833	11.9539	chr3:177	1.33992	.	10.614	ATAC > CNV	De novo increase
chr16	6492556	6492885	0.0224598	0.000648334	mergeATAC_peak21762	11.8693	chr16:6	1.26163	.	10.6076	ATAC > CNV	De novo increase
chr3	149395829	149396182	0.00233248	2.35195e-05	mergeATAC_peak42292	11.8994	chr3:149	1.3209	.	10.5785	ATAC > CNV	De novo increase
chr8	129984265	129984594	2.56269e-05	8.69159e-08	mergeATAC_peak60982	15.1743	chr8:129	4.64042	.	10.5339	ATAC > CNV	De novo increase
chr5	180328726	180328954	0.00231823	2.33043e-05	mergeATAC_peak49763	12.9081	chr5:180	2.38985	.	10.5183	ATAC > CNV	De novo increase
chr6	134373552	134373765	0.0223428	0.000642581	mergeATAC_peak53328	12.0701	chr6:134	1.55713	ENSG00000290029	10.5129	ATAC > CNV	De novo increase
chr8	102124987	102125169	0.0441574	0.00193349	mergeATAC_peak60083	15.1957	chr8:102	4.68451	NCALD;MIR5680	10.5112	ATAC > CNV	De novo increase
chr1	229714880	229715205	0.00742642	0.000124129	mergeATAC_peak6312	11.8525	chr1:229	1.3457	.	10.5068	ATAC > CNV	De novo increase
chr6	147081120	147081505	0.0318506	0.00113982	mergeATAC_peak53683	11.5716	chr6:147	1.11182	.	10.4598	ATAC > CNV	De novo increase
chr1	206608203	206608383	0.0442552	0.00195056	mergeATAC_peak5530	12.1212	chr1:206	1.66368	EIF2D	10.4575	ATAC > CNV	De novo increase
chr5	176837705	176837935	0.00253421	2.70942e-05	mergeATAC_peak49602	11.9346	chr5:176	1.49745	.	10.4372	ATAC > CNV	De novo increase
chr13	100084879	100085056	0.0108261	0.000211086	mergeATAC_peak16934	11.5523	chr13:100	1.17446	.	10.3779	ATAC > CNV	De novo increase
chr7	131347309	131347526	0.0442552	0.00195056	mergeATAC_peak57564	11.6273	chr7:131	1.27409	.	10.3532	ATAC > CNV	De novo increase
chr5	170484826	170485137	0.0315601	0.00111983	mergeATAC_peak49405	12.1979	chr5:170	1.87782	.	10.3201	ATAC > CNV	De novo increase
chr17	40612795	40613125	0.0317048	0.00112978	mergeATAC_peak25360	12.194	chr17:40	1.87943	.	10.3146	ATAC > CNV	De novo increase
chr7	76607949	76608226	0.0224598	0.000648334	mergeATAC_peak56243	11.8866	chr7:76	1.59521	.	10.2914	ATAC > CNV	De novo increase
chr21	35995273	35995753	0.00380646	4.76452e-05	mergeATAC_peak37845	11.2797	chr21:35	1.01692	.	10.2628	ATAC > CNV	De novo increase
chr8	108225280	108225606	0.0108903	0.000213	mergeATAC_peak60277	12.0572	chr8:108	1.89863	ENSG00000253754	10.1586	ATAC > CNV	De novo increase
chr20	45944154	45944401	0.00231823	2.29849e-05	mergeATAC_peak36767	11.9069	chr20:45	1.75187	PCIF1	10.155	ATAC > CNV	De novo increase
chr1	170537861	170538288	0.000293229	1.69022e-06	mergeATAC_peak4542	11.4446	chr1:170	1.30154	GORAB	10.1431	ATAC > CNV	De novo increase
chr6	28950958	28951164	0.0223428	0.000642581	mergeATAC_peak50756	11.7927	chr6:28	1.65318	.	10.1395	ATAC > CNV	De novo increase
chr8	98983077	98983519	2.24549e-06	5.02026e-09	mergeATAC_peak59903	15.5158	chr8:98	5.38308	.	10.1327	ATAC > CNV	De novo increase
chr19	46271512	46272129	0.00379495	4.74434e-05	mergeATAC_peak30553	11.1868	chr19:46	1.11278	.	10.074	ATAC > CNV	De novo increase
chr6	38617686	38617965	0.0445625	0.00198512	mergeATAC_peak51326	11.0369	chr6:38	1.01207	.	10.0248	ATAC > CNV	De novo increase
chr1	236714982	236715140	0.0317048	0.00112978	mergeATAC_peak6559	11.6164	chr1:236	1.60998	.	10.0065	ATAC > CNV	De novo increase
chr1	244353760	244354106	0.0317048	0.00112978	mergeATAC_peak6687	12.0044	chr1:244	2.01739	.	9.98702	ATAC > CNV	De novo increase
chr8	141550314	141550480	0.0442552	0.00195056	mergeATAC_peak61389	14.056	chr8:141	4.07364	.	9.98237	ATAC > CNV	De novo increase
chr8	131245894	131246088	0.000970514	7.26214e-06	mergeATAC_peak61014	15.7006	chr8:131	5.72107	.	9.97956	ATAC > CNV	De novo increase
chr1	146377997	146378169	0.0108903	0.000213	mergeATAC_peak3433	11.363	chr1:146	1.43514	.	9.92791	ATAC > CNV	De novo increase
chr5	154639138	154639299	0.0108261	0.000211086	mergeATAC_peak49052	12.5006	chr5:154	2.6285	.	9.87215	ATAC > CNV	De novo increase
chr17	909760	909971	0.0315601	0.00111983	mergeATAC_peak23890	11.1148	chr17:0	1.31121	ENSG00000262003	9.80355	ATAC > CNV	De novo increase
chr1	200477704	200478100	0.00234318	2.37367e-05	mergeATAC_peak5175	11.3542	chr1:200	1.57777	.	9.77639	ATAC > CNV	De novo increase
chr7	140719778	140720071	0.0321458	0.00117043	mergeATAC_peak57760	11.0676	chr7:140	1.30471	.	9.76287	ATAC > CNV	De novo increase
chr8	115333780	115334113	0.00340064	3.97727e-05	mergeATAC_peak60429	14.3258	chr8:115	4.57805	.	9.74776	ATAC > CNV	De novo increase
chr17	39618044	39618369	0.00346831	4.08806e-05	mergeATAC_peak25253	11.3577	chr17:39	1.61687	.	9.74084	ATAC > CNV	De novo increase
chr20	63682388	63682787	0.0226488	0.000654136	mergeATAC_peak37317	11.3004	chr20:63	1.56202	RTEL1	9.73833	ATAC > CNV	De novo increase
chr5	170253729	170254356	0.00377586	4.66434e-05	mergeATAC_peak49397	11.6112	chr5:170	1.87782	.	9.73336	ATAC > CNV	De novo increase
chr1	156838992	156839167	0.0442552	0.00195056	mergeATAC_peak4057	12.0883	chr1:156	2.3976	.	9.69067	ATAC > CNV	De novo increase
chr8	98974194	98974356	0.0312199	0.00110016	mergeATAC_peak59900	15.0143	chr8:98	5.38308	.	9.63122	ATAC > CNV	De novo increase
chr8	100693740	100693928	0.00337995	3.94098e-05	mergeATAC_peak59982	17.2468	chr8:100	7.66417	.	9.58262	ATAC > CNV	De novo increase
chr8	133725199	133725532	0.0220526	0.000631216	mergeATAC_peak61103	15.7742	chr8:133	6.19438	.	9.57982	ATAC > CNV	De novo increase
chr17	72463361	72463641	0.0317048	0.00112978	mergeATAC_peak26649	10.5782	chr17:72	1.02166	.	9.55651	ATAC > CNV	De novo increase
chr21	35985048	35985351	0.00348692	4.12563e-05	mergeATAC_peak37843	10.5389	chr21:35	1.01692	RUNX1	9.52202	ATAC > CNV	De novo increase
chr8	132055526	132055746	1.08995e-05	3.14963e-08	mergeATAC_peak61022	13.716	chr8:132	4.20475	.	9.51121	ATAC > CNV	De novo increase
chr17	38867593	38867754	0.0445625	0.00198512	mergeATAC_peak25211	10.5895	chr17:38	1.1319	.	9.45759	ATAC > CNV	De novo increase
chr1	168972992	168973527	1.87571e-05	6.01931e-08	mergeATAC_peak4496	11.0177	chr1:168	1.60574	.	9.412	ATAC > CNV	De novo increase
chr1	173134740	173135147	0.0110627	0.000216875	mergeATAC_peak4628	10.7729	chr1:173	1.36715	.	9.40578	ATAC > CNV	De novo increase
chr8	123528204	123528630	0.000288845	1.66056e-06	mergeATAC_peak60681	11.2513	chr8:123	1.87538	.	9.37588	ATAC > CNV	De novo increase
chr8	101701436	101701708	0.0049597	6.84164e-05	mergeATAC_peak60062	14.5548	chr8:101	5.18747	.	9.36731	ATAC > CNV	De novo increase
chr17	28763783	28764048	0.00511213	7.16076e-05	mergeATAC_peak24919	11.0682	chr17:28	1.77546	.	9.29275	ATAC > CNV	De novo increase
chr8	123166219	123166560	0.0318506	0.00113982	mergeATAC_peak60663	11.137	chr8:123	1.87538	.	9.26161	ATAC > CNV	De novo increase
chr21	36661534	36661868	0.0317048	0.00112978	mergeATAC_peak37882	10.7188	chr21:36	1.46781	.	9.25103	ATAC > CNV	De novo increase
chr1	33338814	33339111	0.044831	0.00202024	mergeATAC_peak1345	10.2548	chr1:33	1.00385	.	9.25093	ATAC > CNV	De novo increase
chr8	134373814	134374108	0.000614498	4.19628e-06	mergeATAC_peak61130	15.7545	chr8:134	6.53886	.	9.21568	ATAC > CNV	De novo increase
chr8	132675233	132675428	0.0314165	0.00110995	mergeATAC_peak61037	13.404	chr8:132	4.20475	DNAAF11	9.1992	ATAC > CNV	De novo increase
chr7	35800470	35800709	0.0318506	0.00113982	mergeATAC_peak55380	10.5365	chr7:35	1.33974	SEPTIN7;SEPTIN7-DT	9.19678	ATAC > CNV	De novo increase
chr3	169173303	169173612	0.0320912	0.00116015	mergeATAC_peak42627	10.2611	chr3:169	1.08854	.	9.17257	ATAC > CNV	De novo increase
chr19	52923373	52923584	0.0445625	0.00198512	mergeATAC_peak30933	10.728	chr19:52	1.55725	ZNF888-AS1;ZNF888	9.1707	ATAC > CNV	De novo increase
chr8	100723366	100723551	0.000381619	2.31e-06	mergeATAC_peak59985	16.8219	chr8:100	7.66417	PABPC1	9.15773	ATAC > CNV	De novo increase
chr8	97775584	97775899	6.67802e-06	1.80786e-08	mergeATAC_peak59845	11.5809	chr8:97	2.43075	LAPTM4B	9.15013	ATAC > CNV	De novo increase
chr22	37190445	37190819	0.00377586	4.69169e-05	mergeATAC_peak39071	10.3237	chr22:37	1.17978	.	9.14388	ATAC > CNV	De novo increase
chr19	49513076	49513340	0.0445625	0.00198512	mergeATAC_peak30804	10.163	chr19:49	1.03997	FCGRT	9.12302	ATAC > CNV	De novo increase
chr8	123541138	123541517	0.00257422	2.75623e-05	mergeATAC_peak60684	10.9937	chr8:123	1.87538	FBXO32	9.11834	ATAC > CNV	De novo increase
chr16	1057541	1057733	0.0317048	0.00112978	mergeATAC_peak21410	10.4746	chr16:1	1.35645	.	9.11818	ATAC > CNV	De novo increase
chr11	134276135	134276284	0.0445625	0.00198512	mergeATAC_peak12618	10.1406	chr11:134	1.02896	ENSG00000289399;GLB1L3	9.11162	ATAC > CNV	De novo increase
chr8	134867023	134867402	1.75044e-07	2.66222e-10	mergeATAC_peak61158	15.6397	chr8:134	6.53886	.	9.10083	ATAC > CNV	De novo increase
chr5	173144289	173144532	0.0441574	0.00193349	mergeATAC_peak49514	10.2958	chr5:173	1.19928	BNIP1;ENSG00000253172	9.09647	ATAC > CNV	De novo increase
chr6	160348157	160348385	0.00511213	7.16076e-05	mergeATAC_peak54120	11.0983	chr6:160	2.00325	SLC22A3	9.0951	ATAC > CNV	De novo increase
chr19	47648648	47648928	0.0446653	0.00199384	mergeATAC_peak30655	10.1707	chr19:47	1.07739	.	9.09332	ATAC > CNV	De novo increase
chr8	109642124	109642273	0.00550678	7.9458e-05	mergeATAC_peak60328	11.4042	chr8:109	2.32081	.	9.0834	ATAC > CNV	De novo increase
chr7	152657961	152658351	0.0111857	0.000220818	mergeATAC_peak58077	10.4	chr7:152	1.32398	.	9.07602	ATAC > CNV	De novo increase
chr5	178114091	178114271	0.0156498	0.000371782	mergeATAC_peak49675	12.2258	chr5:178	3.15196	N4BP3	9.07387	ATAC > CNV	De novo increase
chr6	71897366	71897623	0.0469933	0.00218774	mergeATAC_peak52099	10.6002	chr6:71	1.56196	.	9.03829	ATAC > CNV	De novo increase
chr1	109399475	109399654	0.0442552	0.00195056	mergeATAC_peak2862	11.9015	chr1:109	2.87466	.	9.02684	ATAC > CNV	De novo increase
chr10	133520276	133520542	0.0159638	0.000381912	mergeATAC_peak9417	10.0295	chr10:133	1.01121	CYP2E1	9.01829	ATAC > CNV	De novo increase
chr1	225795659	225795952	0.0158618	0.000378505	mergeATAC_peak6134	10.5727	chr1:225	1.57633	.	8.99637	ATAC > CNV	De novo increase
chr17	63741761	63742061	0.0318506	0.00113982	mergeATAC_peak26370	10.3069	chr17:63	1.32444	STRADA	8.98246	ATAC > CNV	De novo increase
chr1	245475182	245475576	0.00745978	0.000125259	mergeATAC_peak6729	10.2503	chr1:245	1.29623	.	8.95409	ATAC > CNV	De novo increase
chr20	54350466	54350728	0.0444615	0.00196777	mergeATAC_peak37103	9.9654	chr20:54	1.05804	.	8.90735	ATAC > CNV	De novo increase
chr1	204443293	204443753	0.000501039	3.23861e-06	mergeATAC_peak5407	10.1646	chr1:204	1.28473	.	8.87986	ATAC > CNV	De novo increase
chr8	73419823	73420035	0.0446653	0.00200261	mergeATAC_peak59511	9.90828	chr8:73	1.04119	STAU2-AS1	8.86709	ATAC > CNV	De novo increase
chr1	223230439	223230881	0.0442552	0.00195056	mergeATAC_peak6019	10.6708	chr1:223	1.8162	SUSD4	8.8546	ATAC > CNV	De novo increase
chr7	73587753	73588231	0.00830382	0.000146878	mergeATAC_peak56055	10.0377	chr7:73	1.19393	.	8.84377	ATAC > CNV	De novo increase
chr7	136023500	136023866	0.00748051	0.000126399	mergeATAC_peak57640	10.3648	chr7:136	1.54603	.	8.81877	ATAC > CNV	De novo increase
chr1	182687421	182687701	0.0319838	0.00114994	mergeATAC_peak4879	10.1062	chr1:182	1.31927	.	8.78688	ATAC > CNV	De novo increase
chr17	74268118	74268412	0.008272	0.000142055	mergeATAC_peak26708	10.1283	chr17:74	1.38106	.	8.74729	ATAC > CNV	De novo increase
chr1	169312096	169312536	0.0446653	0.00200261	mergeATAC_peak4506	10.2648	chr1:169	1.56259	.	8.70226	ATAC > CNV	De novo increase
chr17	79005366	79005612	0.0444615	0.00196777	mergeATAC_peak27045	9.96631	chr17:79	1.31328	CANT1	8.65304	ATAC > CNV	De novo increase
chr6	106785564	106785913	0.0454735	0.00210313	mergeATAC_peak52736	10.3585	chr6:106	1.70797	LINC02532	8.65054	ATAC > CNV	De novo increase
chr1	26857090	26857474	0.0228749	0.000665884	mergeATAC_peak1070	9.64369	chr1:26	1.00369	.	8.63999	ATAC > CNV	De novo increase
chr8	140213623	140213980	7.51694e-05	3.05246e-07	mergeATAC_peak61298	12.1907	chr8:140	3.56306	.	8.62764	ATAC > CNV	De novo increase
chr8	102108990	102109151	0.0156498	0.000371782	mergeATAC_peak60081	13.3059	chr8:102	4.68451	.	8.62144	ATAC > CNV	De novo increase
chr17	43778138	43778486	0.00236202	2.41766e-05	mergeATAC_peak25584	10.0252	chr17:43	1.41583	DUSP3	8.60937	ATAC > CNV	De novo increase
chr9	111857592	111857881	0.0315601	0.00111983	mergeATAC_peak63541	10.0082	chr9:111	1.40682	.	8.60141	ATAC > CNV	De novo increase
chr9	90947034	90947361	0.0172708	0.000439208	mergeATAC_peak62953	9.62898	chr9:90	1.06585	.	8.56314	ATAC > CNV	De novo increase
chr1	150876786	150877083	0.00154966	1.3387e-05	mergeATAC_peak3632	11.2224	chr1:150	2.6685	ARNT	8.55388	ATAC > CNV	De novo increase
chr11	134352633	134352985	0.008272	0.000143246	mergeATAC_peak12624	9.55809	chr11:134	1.02896	.	8.52913	ATAC > CNV	De novo increase
chr17	47650681	47650949	0.0445625	0.00198512	mergeATAC_peak25775	9.69901	chr17:47	1.17216	KPNB1	8.52685	ATAC > CNV	De novo increase
chr7	76373256	76373617	0.0015531	1.35112e-05	mergeATAC_peak56223	10.117	chr7:76	1.59521	.	8.52179	ATAC > CNV	De novo increase
chr5	178130487	178130698	0.0172708	0.000425073	mergeATAC_peak49679	11.656	chr5:178	3.15196	RMND5B	8.50404	ATAC > CNV	De novo increase
chr16	6142972	6143529	0.00570456	8.57189e-05	mergeATAC_peak21758	9.76383	chr16:6	1.26163	.	8.5022	ATAC > CNV	De novo increase
chr5	177086502	177086954	0.00550678	7.9458e-05	mergeATAC_peak49610	10.1994	chr5:177	1.69784	FGFR4	8.50153	ATAC > CNV	De novo increase
chr8	101452693	101453028	9.33181e-07	1.78827e-09	mergeATAC_peak60033	13.6796	chr8:101	5.18747	ENSG00000254084	8.49217	ATAC > CNV	De novo increase
chr8	137334700	137334911	1.4678e-05	4.39776e-08	mergeATAC_peak61210	13.8966	chr8:137	5.43939	.	8.45719	ATAC > CNV	De novo increase
chr1	229935165	229935417	0.0320912	0.00116015	mergeATAC_peak6320	9.79502	chr1:229	1.3457	.	8.44931	ATAC > CNV	De novo increase
chr1	183658361	183658683	0.0445625	0.00198512	mergeATAC_peak4922	9.68998	chr1:183	1.24143	.	8.44855	ATAC > CNV	De novo increase
chr16	1055181	1055365	0.0445625	0.00198512	mergeATAC_peak21409	9.80033	chr16:1	1.35645	.	8.44388	ATAC > CNV	De novo increase
chr8	133954471	133954892	2.29319e-08	2.44138e-11	mergeATAC_peak61112	14.6254	chr8:133	6.19438	.	8.43102	ATAC > CNV	De novo increase
chr8	133391046	133391289	0.00745978	0.000125259	mergeATAC_peak61073	14.6162	chr8:133	6.19438	.	8.42187	ATAC > CNV	De novo increase
chr17	41788536	41788778	0.0120998	0.000247032	mergeATAC_peak25422	9.90998	chr17:41	1.49656	.	8.41343	ATAC > CNV	De novo increase
chr9	69324496	69324777	0.0319838	0.00114994	mergeATAC_peak62417	9.95263	chr9:69	1.56843	ENTREP1	8.3842	ATAC > CNV	De novo increase
chr1	157294427	157294760	0.00179689	1.63972e-05	mergeATAC_peak4092	10.3463	chr1:157	1.96753	.	8.37879	ATAC > CNV	De novo increase
chr17	82874439	82874749	0.0172708	0.000425073	mergeATAC_peak27324	10.0506	chr17:82	1.69737	.	8.35319	ATAC > CNV	De novo increase
chr1	165482181	165482556	0.00511213	7.16076e-05	mergeATAC_peak4379	10.7075	chr1:165	2.36698	.	8.34054	ATAC > CNV	De novo increase
chr6	17120110	17120488	0.0035097	4.16354e-05	mergeATAC_peak50375	9.49824	chr6:17	1.17253	.	8.32571	ATAC > CNV	De novo increase
chr17	56960987	56961245	0.00561057	8.35819e-05	mergeATAC_peak26121	9.51319	chr17:56	1.20061	COIL	8.31258	ATAC > CNV	De novo increase
chr6	106119505	106119966	0.0227794	0.000659985	mergeATAC_peak52698	10.0055	chr6:106	1.70797	.	8.29753	ATAC > CNV	De novo increase
chr8	140255051	140255337	0.00745978	0.000125259	mergeATAC_peak61299	11.8352	chr8:140	3.56306	.	8.27219	ATAC > CNV	De novo increase
chr8	97847204	97847479	0.00231823	2.33043e-05	mergeATAC_peak59855	10.6982	chr8:97	2.43075	.	8.26745	ATAC > CNV	De novo increase
chr8	141059280	141059429	0.0441574	0.00193349	mergeATAC_peak61341	12.3288	chr8:141	4.07364	ENSG00000253266	8.25518	ATAC > CNV	De novo increase
chr17	64326329	64326639	0.00391179	4.90825e-05	mergeATAC_peak26421	9.96839	chr17:64	1.73317	.	8.23522	ATAC > CNV	De novo increase
chr8	97856795	97856999	0.0318506	0.00113982	mergeATAC_peak59856	10.6506	chr8:97	2.43075	.	8.2198	ATAC > CNV	De novo increase
chr17	973101	973463	0.0230431	0.000671831	mergeATAC_peak23900	9.51013	chr17:0	1.31121	.	8.19892	ATAC > CNV	De novo increase
chr19	48506235	48506401	0.0228749	0.000665884	mergeATAC_peak30705	9.41545	chr19:48	1.23016	.	8.1853	ATAC > CNV	De novo increase
chr13	110527322	110527684	0.00516677	7.29227e-05	mergeATAC_peak17124	9.74	chr13:110	1.59281	.	8.14718	ATAC > CNV	De novo increase
chr8	133401376	133401686	0.000438165	2.76556e-06	mergeATAC_peak61076	14.3075	chr8:133	6.19438	.	8.11307	ATAC > CNV	De novo increase
chr19	13085726	13086007	0.0444615	0.00196777	mergeATAC_peak29448	9.24777	chr19:13	1.17016	.	8.07761	ATAC > CNV	De novo increase
chr5	170491379	170491768	0.0160604	0.000385346	mergeATAC_peak49407	9.94604	chr5:170	1.87782	.	8.06822	ATAC > CNV	De novo increase
chr8	129939704	129940109	4.62658e-05	1.73802e-07	mergeATAC_peak60978	12.7068	chr8:129	4.64042	CYRIB;ENSG00000253720	8.06636	ATAC > CNV	De novo increase
chr17	51555192	51555442	0.0446653	0.00200261	mergeATAC_peak26037	9.44479	chr17:51	1.40843	.	8.03636	ATAC > CNV	De novo increase
chr12	124321054	124321274	0.044831	0.00202024	mergeATAC_peak15428	9.44779	chr12:124	1.43765	.	8.01014	ATAC > CNV	De novo increase
chr6	52725871	52726107	0.0318506	0.00113982	mergeATAC_peak51813	9.80576	chr6:52	1.80687	.	7.99889	ATAC > CNV	De novo increase
chr15	40344612	40344809	0.017186	0.000421606	mergeATAC_peak19553	9.4543	chr15:40	1.46465	.	7.98965	ATAC > CNV	De novo increase
chr1	224925565	224926054	0.00120932	9.72957e-06	mergeATAC_peak6109	9.38926	chr1:224	1.41159	.	7.97767	ATAC > CNV	De novo increase
chr7	143419975	143420202	0.005674	8.50009e-05	mergeATAC_peak57839	9.57756	chr7:143	1.61485	.	7.96271	ATAC > CNV	De novo increase
chr6	36667056	36667403	0.00178744	1.62566e-05	mergeATAC_peak51256	9.49754	chr6:36	1.5405	.	7.95704	ATAC > CNV	De novo increase
chr1	182175329	182175643	0.0445625	0.00198512	mergeATAC_peak4856	9.27032	chr1:182	1.31927	.	7.95104	ATAC > CNV	De novo increase
chr17	43798010	43798317	0.0227794	0.000659985	mergeATAC_peak25587	9.34842	chr17:43	1.41583	.	7.93259	ATAC > CNV	De novo increase
chr1	109514781	109515204	0.00508233	7.09583e-05	mergeATAC_peak2875	10.8052	chr1:109	2.87466	.	7.93052	ATAC > CNV	De novo increase
chr19	57477472	57477735	0.0244133	0.000747729	mergeATAC_peak31072	9.59999	chr19:57	1.67364	ENSG00000268163;ENSG00000268266;ZNF772	7.92635	ATAC > CNV	De novo increase
chr7	157016518	157016841	0.00181899	1.66819e-05	mergeATAC_peak58167	9.10251	chr7:157	1.23228	.	7.87023	ATAC > CNV	De novo increase
chr8	123537635	123538025	0.00389689	4.88363e-05	mergeATAC_peak60682	9.74311	chr8:123	1.87538	.	7.86772	ATAC > CNV	De novo increase
chr8	101003666	101003912	6.36359e-05	2.48733e-07	mergeATAC_peak60006	13.0438	chr8:101	5.18747	.	7.85629	ATAC > CNV	De novo increase
chr1	224781829	224782182	0.0035097	4.16354e-05	mergeATAC_peak6104	9.22855	chr1:224	1.41159	.	7.81696	ATAC > CNV	De novo increase
chr1	211590216	211590539	0.0445625	0.00198512	mergeATAC_peak5737	9.17331	chr1:211	1.36445	.	7.80886	ATAC > CNV	De novo increase
chr17	59996757	59997148	0.0227794	0.000659985	mergeATAC_peak26249	9.08175	chr17:59	1.27411	.	7.80763	ATAC > CNV	De novo increase
chr7	22328800	22329077	0.0120998	0.000253234	mergeATAC_peak55022	9.14761	chr7:22	1.36672	.	7.78089	ATAC > CNV	De novo increase
chr18	961649	961846	0.0445625	0.00198512	mergeATAC_peak27385	9.07012	chr18:0	1.32092	.	7.7492	ATAC > CNV	De novo increase
chr8	110381644	110381863	0.0109804	0.000214929	mergeATAC_peak60346	11.1466	chr8:110	3.40609	.	7.74051	ATAC > CNV	De novo increase
chr6	52156068	52156502	0.0227794	0.000659985	mergeATAC_peak51785	9.53817	chr6:52	1.80687	.	7.73129	ATAC > CNV	De novo increase
chr20	53793852	53794154	3.10545e-05	1.10047e-07	mergeATAC_peak37064	9.25894	chr20:53	1.54604	.	7.7129	ATAC > CNV	De novo increase
chr1	183370443	183370671	0.0319838	0.00114994	mergeATAC_peak4908	8.94751	chr1:183	1.24143	.	7.70608	ATAC > CNV	De novo increase
chr21	17738648	17738909	0.0158618	0.000378507	mergeATAC_peak37493	9.86393	chr21:17	2.17239	.	7.69154	ATAC > CNV	De novo increase
chr9	97387025	97387250	0.0228749	0.000665884	mergeATAC_peak63209	8.81728	chr9:97	1.17105	.	7.64623	ATAC > CNV	De novo increase
chr8	115586721	115586914	0.0315601	0.00111983	mergeATAC_peak60432	12.2195	chr8:115	4.57805	.	7.64148	ATAC > CNV	De novo increase
chr1	160124773	160125180	0.00518048	7.35893e-05	mergeATAC_peak4173	9.72037	chr1:160	2.11608	ATP1A2	7.6043	ATAC > CNV	De novo increase
chr7	65751799	65751975	0.0159638	0.000381912	mergeATAC_peak55893	8.64335	chr7:65	1.07753	ENSG00000291124;CCT6P1;LINC03006	7.56582	ATAC > CNV	De novo increase
chr6	110760033	110760450	0.0112325	0.000222815	mergeATAC_peak52849	8.82493	chr6:110	1.26306	.	7.56186	ATAC > CNV	De novo increase
chr7	5358977	5359149	0.0230431	0.000671831	mergeATAC_peak54602	8.75994	chr7:5	1.22893	.	7.53101	ATAC > CNV	De novo increase
chr1	174990404	174990687	0.0161596	0.000388806	mergeATAC_peak4678	8.65743	chr1:174	1.18376	.	7.47367	ATAC > CNV	De novo increase
chr5	179649935	179650122	0.0445625	0.00198512	mergeATAC_peak49728	10.241	chr5:179	2.79799	.	7.44303	ATAC > CNV	De novo increase
chr8	130021740	130021996	0.00731959	0.000121899	mergeATAC_peak60989	11.9474	chr8:130	4.50571	.	7.44164	ATAC > CNV	De novo increase
chr7	101144036	101144308	0.00412162	5.29001e-05	mergeATAC_peak56885	8.56066	chr7:101	1.13788	.	7.42278	ATAC > CNV	De novo increase
chr5	66633942	66634198	0.0320912	0.00116015	mergeATAC_peak47367	8.62975	chr5:66	1.20807	.	7.42167	ATAC > CNV	De novo increase
chr6	158917710	158917962	0.0228749	0.000665884	mergeATAC_peak54068	9.45747	chr6:158	2.04724	.	7.41023	ATAC > CNV	De novo increase
chr17	8033419	8033851	0.00275264	2.97657e-05	mergeATAC_peak24329	9.03692	chr17:8	1.63259	.	7.40434	ATAC > CNV	De novo increase
chr15	98713564	98713985	0.0120998	0.000255333	mergeATAC_peak21211	8.85699	chr15:98	1.46095	.	7.39604	ATAC > CNV	De novo increase
chr9	76525999	76526336	0.0112845	0.000224828	mergeATAC_peak62633	8.73912	chr9:76	1.34564	.	7.39348	ATAC > CNV	De novo increase
chr6	136123471	136123855	0.00873304	0.00015796	mergeATAC_peak53395	8.56787	chr6:136	1.17446	.	7.39341	ATAC > CNV	De novo increase
chr17	77264729	77265095	0.0120998	0.00025745	mergeATAC_peak26938	8.79726	chr17:77	1.41608	ENSG00000265121	7.38118	ATAC > CNV	De novo increase
chr8	120452743	120453018	0.00271045	2.91447e-05	mergeATAC_peak60590	9.04279	chr8:120	1.71206	.	7.33073	ATAC > CNV	De novo increase
chr15	70722740	70722902	0.044831	0.00202024	mergeATAC_peak20415	8.46963	chr15:70	1.1417	.	7.32794	ATAC > CNV	De novo increase
chr14	19902460	19902726	0.0230909	0.000677828	mergeATAC_peak17273	8.6051	chr14:19	1.29845	.	7.30665	ATAC > CNV	De novo increase
chr11	35040557	35040964	0.0244133	0.000772267	mergeATAC_peak10345	8.38048	chr11:35	1.10803	.	7.27245	ATAC > CNV	De novo increase
chr1	201899122	201899322	0.0319838	0.00114994	mergeATAC_peak5261	9.09234	chr1:201	1.83592	.	7.25642	ATAC > CNV	De novo increase
chr6	151675801	151676024	0.0172708	0.000435634	mergeATAC_peak53849	8.51553	chr6:151	1.26609	.	7.24944	ATAC > CNV	De novo increase
chr5	3595687	3595949	0.0120998	0.000253234	mergeATAC_peak46378	8.3006	chr5:3	1.07241	IRX1	7.22819	ATAC > CNV	De novo increase
chr6	167137080	167137453	0.0320912	0.00116015	mergeATAC_peak54253	8.61134	chr6:167	1.38444	.	7.22691	ATAC > CNV	De novo increase
chr8	10838987	10839155	0.0320912	0.00116015	mergeATAC_peak58430	8.26555	chr8:10	1.04078	PINX1-DT;PINX1	7.22476	ATAC > CNV	De novo increase
chr6	53128845	53129317	0.000159658	8.01311e-07	mergeATAC_peak51834	8.98002	chr6:53	1.76154	.	7.21848	ATAC > CNV	De novo increase
chr11	2077459	2077883	0.0321458	0.00117043	mergeATAC_peak9555	8.25783	chr11:2	1.03958	.	7.21825	ATAC > CNV	De novo increase
chr9	114894867	114895177	0.0446653	0.00200261	mergeATAC_peak63693	8.8173	chr9:114	1.61734	.	7.19996	ATAC > CNV	De novo increase
chr1	117166017	117166543	0.00854669	0.000153123	mergeATAC_peak3186	8.32492	chr1:117	1.1261	.	7.19883	ATAC > CNV	De novo increase
chr6	157126340	157126639	0.0244133	0.000741709	mergeATAC_peak53972	8.66981	chr6:157	1.47244	.	7.19737	ATAC > CNV	De novo increase
chr17	1058456	1058692	0.00840006	0.000149346	mergeATAC_peak23908	8.66494	chr17:1	1.4726	ABR	7.19233	ATAC > CNV	De novo increase
chr6	153135381	153135783	0.0321458	0.00117043	mergeATAC_peak53884	8.51315	chr6:153	1.34648	.	7.16667	ATAC > CNV	De novo increase
chr1	240117371	240117715	0.0446653	0.00200261	mergeATAC_peak6593	8.32397	chr1:240	1.1744	.	7.14957	ATAC > CNV	De novo increase
chr9	129777034	129777588	0.00271753	2.92621e-05	mergeATAC_peak64241	8.58423	chr9:129	1.43556	.	7.14866	ATAC > CNV	De novo increase
chr16	20675849	20676297	0.0172708	0.000435634	mergeATAC_peak22136	8.94907	chr16:20	1.80849	ACSM1	7.14058	ATAC > CNV	De novo increase
chr20	47493979	47494187	0.0112845	0.000224828	mergeATAC_peak36834	8.40572	chr20:47	1.26518	RNU6-563P	7.14054	ATAC > CNV	De novo increase
chr8	139405829	139406055	0.00377586	4.70416e-05	mergeATAC_peak61274	10.8077	chr8:139	3.67788	.	7.12985	ATAC > CNV	De novo increase
chr1	226739320	226739609	0.0446653	0.00200261	mergeATAC_peak6198	8.77491	chr1:226	1.65341	ITPKB	7.1215	ATAC > CNV	De novo increase
chr8	101761026	101761688	2.36439e-09	1.90587e-12	mergeATAC_peak60066	12.3069	chr8:101	5.18747	.	7.11946	ATAC > CNV	De novo increase
chr5	177863842	177864160	0.0445625	0.00198512	mergeATAC_peak49653	8.8112	chr5:177	1.69784	.	7.11335	ATAC > CNV	De novo increase
chr5	16991262	16991545	0.00076453	5.43011e-06	mergeATAC_peak46603	9.22107	chr5:16	2.11731	.	7.10376	ATAC > CNV	De novo increase
chr4	76526479	76526810	0.0120998	0.00025745	mergeATAC_peak44620	8.24884	chr4:76	1.14774	.	7.10109	ATAC > CNV	De novo increase
chr17	15642836	15643298	0.0120998	0.00025241	mergeATAC_peak24523	8.33253	chr17:15	1.2387	TRIM16	7.09383	ATAC > CNV	De novo increase
chr8	128031107	128031256	0.0315601	0.00111983	mergeATAC_peak60912	11.4606	chr8:128	4.36839	.	7.09219	ATAC > CNV	De novo increase
chr17	79839872	79840044	0.0320912	0.00116015	mergeATAC_peak27086	8.40067	chr17:79	1.31328	CBX4	7.08739	ATAC > CNV	De novo increase
chr17	2960112	2960415	0.00752145	0.000127548	mergeATAC_peak24050	8.56755	chr17:2	1.49131	.	7.07624	ATAC > CNV	De novo increase
chr17	19533725	19533980	0.0244133	0.000759906	mergeATAC_peak24724	8.36989	chr17:19	1.29784	SLC47A1	7.07206	ATAC > CNV	De novo increase
chr9	115996534	115996908	0.0321458	0.00117043	mergeATAC_peak63723	8.29129	chr9:115	1.23114	.	7.06015	ATAC > CNV	De novo increase
chr8	141644189	141644427	0.008272	0.000142055	mergeATAC_peak61391	11.1253	chr8:141	4.07364	.	7.0517	ATAC > CNV	De novo increase
chr1	202999336	202999556	0.00393555	4.95004e-05	mergeATAC_peak5327	8.60754	chr1:202	1.56725	ENSG00000231547	7.04029	ATAC > CNV	De novo increase
chr7	152588303	152588737	0.0321458	0.00117043	mergeATAC_peak58075	8.35766	chr7:152	1.32398	.	7.03368	ATAC > CNV	De novo increase
chr1	153742964	153743133	0.0446653	0.00200261	mergeATAC_peak3819	8.81483	chr1:153	1.78626	.	7.02857	ATAC > CNV	De novo increase
chr9	94950426	94950725	0.032241	0.0011808	mergeATAC_peak63114	8.40147	chr9:94	1.37538	.	7.0261	ATAC > CNV	De novo increase
chr19	57799309	57799593	0.0112325	0.000222815	mergeATAC_peak31089	8.68544	chr19:57	1.67364	.	7.0118	ATAC > CNV	De novo increase
chr11	118233417	118233791	0.00752145	0.000127548	mergeATAC_peak12202	8.08827	chr11:118	1.07719	.	7.01108	ATAC > CNV	De novo increase
chr8	130358531	130359098	2.41183e-06	5.53886e-09	mergeATAC_peak60997	11.5071	chr8:130	4.50571	ENSG00000286535	7.00141	ATAC > CNV	De novo increase
chr17	27760101	27760296	0.00757621	0.000128707	mergeATAC_peak24857	9.19768	chr17:27	2.21473	.	6.98296	ATAC > CNV	De novo increase
chr6	110096819	110097210	0.00193066	1.82933e-05	mergeATAC_peak52837	8.23788	chr6:110	1.26306	.	6.97482	ATAC > CNV	De novo increase
chr20	53786115	53786431	0.00234741	2.39557e-05	mergeATAC_peak37061	8.51469	chr20:53	1.54604	.	6.96865	ATAC > CNV	De novo increase
chr21	42724395	42724817	0.0321458	0.00117043	mergeATAC_peak38168	8.60493	chr21:42	1.64538	.	6.95956	ATAC > CNV	De novo increase
chr9	114738972	114739232	0.00116751	9.30446e-06	mergeATAC_peak63682	8.5377	chr9:114	1.61734	.	6.92036	ATAC > CNV	De novo increase
chr8	143933819	143934391	2.97346e-06	7.14523e-09	mergeATAC_peak61524	10.1569	chr8:143	3.23947	.	6.91746	ATAC > CNV	De novo increase
chr7	6290366	6290813	0.00518048	7.35893e-05	mergeATAC_peak54653	8.46515	chr7:6	1.55343	.	6.91172	ATAC > CNV	De novo increase
chr20	63309599	63309793	0.0321458	0.00117043	mergeATAC_peak37290	8.45892	chr20:63	1.56202	.	6.8969	ATAC > CNV	De novo increase
chr8	70951378	70951710	0.044831	0.00202024	mergeATAC_peak59468	8.01984	chr8:70	1.12297	.	6.89688	ATAC > CNV	De novo increase
chr6	40138495	40138781	0.00844143	0.000150595	mergeATAC_peak51383	7.96606	chr6:40	1.07245	.	6.89362	ATAC > CNV	De novo increase
chr1	171948449	171948927	0.00589667	8.97716e-05	mergeATAC_peak4584	8.24508	chr1:171	1.35307	.	6.89201	ATAC > CNV	De novo increase
chr8	141146276	141146492	0.00513657	7.22625e-05	mergeATAC_peak61350	10.9384	chr8:141	4.07364	.	6.8648	ATAC > CNV	De novo increase
chr21	41681410	41681725	0.0320912	0.00116015	mergeATAC_peak38092	8.5893	chr21:41	1.72584	.	6.86346	ATAC > CNV	De novo increase
chr16	23874643	23874886	0.0446653	0.00200261	mergeATAC_peak22260	8.3	chr16:23	1.44244	.	6.85756	ATAC > CNV	De novo increase
chr21	32443405	32443712	0.0112325	0.000222815	mergeATAC_peak37724	8.42827	chr21:32	1.57276	.	6.85552	ATAC > CNV	De novo increase
chr19	56393444	56393774	0.0231303	0.000683874	mergeATAC_peak31049	8.66663	chr19:56	1.86339	ZNF582;ZNF582-DT	6.80324	ATAC > CNV	De novo increase
chr8	102197485	102197736	7.85854e-05	3.21508e-07	mergeATAC_peak60087	11.4823	chr8:102	4.68451	.	6.79783	ATAC > CNV	De novo increase
chr6	157969162	157969394	0.044831	0.00202024	mergeATAC_peak54005	8.26023	chr6:157	1.47244	.	6.78779	ATAC > CNV	De novo increase
chr6	2940212	2940694	0.0120998	0.00024662	mergeATAC_peak49906	8.02479	chr6:2	1.23856	.	6.78623	ATAC > CNV	De novo increase
chr8	143140906	143141165	0.0228749	0.000665884	mergeATAC_peak61457	10.0241	chr8:143	3.23947	.	6.78461	ATAC > CNV	De novo increase
chr6	153118607	153118923	0.0111857	0.000220818	mergeATAC_peak53880	8.12955	chr6:153	1.34648	.	6.78307	ATAC > CNV	De novo increase
chr1	109786642	109786855	0.044831	0.00202024	mergeATAC_peak2894	9.64035	chr1:109	2.87466	.	6.76569	ATAC > CNV	De novo increase
chr8	101702862	101703180	0.000451715	2.86482e-06	mergeATAC_peak60063	11.9478	chr8:101	5.18747	.	6.76037	ATAC > CNV	De novo increase
chr16	15899721	15900029	0.0244133	0.000747729	mergeATAC_peak22029	7.83712	chr16:15	1.07678	.	6.76034	ATAC > CNV	De novo increase
chr15	97904211	97904491	0.0470618	0.00222244	mergeATAC_peak21193	7.99625	chr15:97	1.24152	.	6.75473	ATAC > CNV	De novo increase
chr6	28881326	28881503	0.0228749	0.000665884	mergeATAC_peak50750	8.3922	chr6:28	1.65318	.	6.73903	ATAC > CNV	De novo increase
chr4	182917242	182917608	0.0244133	0.000751058	mergeATAC_peak46084	7.82503	chr4:182	1.0928	DCTD	6.73223	ATAC > CNV	De novo increase
chr5	178070065	178070254	0.0228749	0.000665884	mergeATAC_peak49666	9.8743	chr5:178	3.15196	.	6.72234	ATAC > CNV	De novo increase
chr9	123637985	123638358	0.00820179	0.000140582	mergeATAC_peak63918	7.92676	chr9:123	1.21091	.	6.71585	ATAC > CNV	De novo increase
chr8	139630926	139631156	0.000454621	2.89017e-06	mergeATAC_peak61277	10.3895	chr8:139	3.67788	.	6.7116	ATAC > CNV	De novo increase
chr5	42839863	42840062	0.0321458	0.00117043	mergeATAC_peak46989	8.65166	chr5:42	1.97875	.	6.67291	ATAC > CNV	De novo increase
chr7	151303495	151303740	0.0018794	1.74932e-05	mergeATAC_peak58010	8.59959	chr7:151	1.92753	.	6.67205	ATAC > CNV	De novo increase
chr17	40954000	40954175	0.0446653	0.00200261	mergeATAC_peak25378	8.52364	chr17:40	1.87943	.	6.64421	ATAC > CNV	De novo increase
chr7	139340173	139340460	0.032241	0.0011808	mergeATAC_peak57707	7.77644	chr7:139	1.14517	FMC1-LUC7L2;FMC1;LUC7L2	6.63127	ATAC > CNV	De novo increase
chr21	17441374	17441742	3.38889e-05	1.22153e-07	mergeATAC_peak37473	8.8014	chr21:17	2.17239	LINC01549	6.62901	ATAC > CNV	De novo increase
chr7	27917037	27917526	0.0469933	0.00218774	mergeATAC_peak55185	7.84615	chr7:27	1.21837	.	6.62778	ATAC > CNV	De novo increase
chr8	123685529	123685712	0.0228749	0.000665884	mergeATAC_peak60692	8.48883	chr8:123	1.87538	.	6.61345	ATAC > CNV	De novo increase
chr9	114852198	114852624	0.000857532	6.20805e-06	mergeATAC_peak63686	8.21291	chr9:114	1.61734	.	6.59557	ATAC > CNV	De novo increase
chr8	97777961	97778199	1.84702e-05	5.89915e-08	mergeATAC_peak59846	9.0159	chr8:97	2.43075	.	6.58515	ATAC > CNV	De novo increase
chr8	138767673	138767914	0.000438165	2.76556e-06	mergeATAC_peak61253	12.1041	chr8:138	5.52961	.	6.57447	ATAC > CNV	De novo increase
chr16	27318658	27318836	0.0470618	0.00223998	mergeATAC_peak22327	7.9973	chr16:27	1.42708	.	6.57022	ATAC > CNV	De novo increase
chr5	42341	42573	0.00587786	8.90653e-05	mergeATAC_peak46267	7.85384	chr5:0	1.30227	.	6.55157	ATAC > CNV	De novo increase
chr8	100516885	100517357	1.75044e-07	2.65471e-10	mergeATAC_peak59972	14.2002	chr8:100	7.66417	.	6.53604	ATAC > CNV	De novo increase
chr8	139213423	139213611	0.0442552	0.00195056	mergeATAC_peak61265	10.2137	chr8:139	3.67788	.	6.53579	ATAC > CNV	De novo increase
chr5	170247456	170247748	0.032241	0.0011808	mergeATAC_peak49395	8.41163	chr5:170	1.87782	.	6.53381	ATAC > CNV	De novo increase
chr18	37444839	37445017	0.0452143	0.00207398	mergeATAC_peak28051	7.6628	chr18:37	1.13661	.	6.52619	ATAC > CNV	De novo increase
chr1	182181112	182181637	9.22282e-05	3.95558e-07	mergeATAC_peak4857	7.82684	chr1:182	1.31927	.	6.50757	ATAC > CNV	De novo increase
chr1	99965714	99966024	0.0058325	8.79075e-05	mergeATAC_peak2712	7.61519	chr1:99	1.10825	.	6.50694	ATAC > CNV	De novo increase
chr7	107125517	107125749	0.0470618	0.00220503	mergeATAC_peak57076	7.53305	chr7:107	1.0366	.	6.49645	ATAC > CNV	De novo increase
chr8	116996746	116997263	0.001874	1.74144e-05	mergeATAC_peak60475	8.61258	chr8:116	2.13544	.	6.47714	ATAC > CNV	De novo increase
chr2	201600874	201601285	0.0122572	0.000261731	mergeATAC_peak34769	7.54839	chr2:201	1.07481	.	6.47358	ATAC > CNV	De novo increase
chr8	123182393	123182769	0.00592565	9.04831e-05	mergeATAC_peak60665	8.3216	chr8:123	1.87538	FAM83A-AS2;FAM83A	6.44621	ATAC > CNV	De novo increase
chr5	43007626	43007802	0.0111857	0.000220818	mergeATAC_peak47004	8.22357	chr5:43	1.79857	ENSG00000271788	6.425	ATAC > CNV	De novo increase
chr20	57710892	57711153	0.0122002	0.00026033	mergeATAC_peak37166	7.97261	chr20:57	1.55855	NKILA;PMEPA1	6.41406	ATAC > CNV	De novo increase
chr9	124877975	124878453	0.0122685	0.000262345	mergeATAC_peak63964	7.73714	chr9:124	1.32857	.	6.40857	ATAC > CNV	De novo increase
chr19	36060506	36060733	0.0321458	0.00117043	mergeATAC_peak30010	8.0679	chr19:36	1.6655	.	6.4024	ATAC > CNV	De novo increase
chr5	9316803	9317057	0.044831	0.00202024	mergeATAC_peak46467	8.17828	chr5:9	1.80087	.	6.37741	ATAC > CNV	De novo increase
chr1	151036398	151036776	0.0112325	0.000222815	mergeATAC_peak3647	9.32659	chr1:151	2.96475	BNIPL	6.36184	ATAC > CNV	De novo increase
chr8	141075572	141075826	7.85859e-06	2.17527e-08	mergeATAC_peak61344	10.4349	chr8:141	4.07364	.	6.36128	ATAC > CNV	De novo increase
chr20	53735639	53735912	0.0344199	0.00132198	mergeATAC_peak37056	7.89844	chr20:53	1.54604	.	6.3524	ATAC > CNV	De novo increase
chr7	42941270	42941529	0.0320912	0.00116015	mergeATAC_peak55541	7.69552	chr7:42	1.34929	.	6.34622	ATAC > CNV	De novo increase
chr5	127557022	127557457	0.00185422	1.71177e-05	mergeATAC_peak48286	7.3668	chr5:127	1.02722	.	6.33957	ATAC > CNV	De novo increase
chr8	97763556	97763911	3.25182e-05	1.16223e-07	mergeATAC_peak59843	8.76901	chr8:97	2.43075	.	6.33826	ATAC > CNV	De novo increase
chr21	35256408	35256955	0.0127127	0.000276872	mergeATAC_peak37835	7.35137	chr21:35	1.01692	.	6.33445	ATAC > CNV	De novo increase
chr1	192792117	192792424	0.0160953	0.000386525	mergeATAC_peak5048	7.94782	chr1:192	1.63794	.	6.30989	ATAC > CNV	De novo increase
chr17	63781064	63781441	0.0232409	0.00068997	mergeATAC_peak26375	7.62789	chr17:63	1.32444	.	6.30345	ATAC > CNV	De novo increase
chr1	150021236	150021612	5.61825e-05	2.15327e-07	mergeATAC_peak3576	8.96868	chr1:150	2.6685	.	6.30019	ATAC > CNV	De novo increase
chr7	18499457	18499732	0.00190713	1.79253e-05	mergeATAC_peak54953	7.62114	chr7:18	1.33164	.	6.2895	ATAC > CNV	De novo increase
chr1	225919950	225920184	0.0172708	0.000450096	mergeATAC_peak6149	7.85484	chr1:225	1.57633	.	6.27851	ATAC > CNV	De novo increase
chr20	63442184	63442394	0.0450121	0.00203801	mergeATAC_peak37294	7.83963	chr20:63	1.56202	.	6.27761	ATAC > CNV	De novo increase
chr6	70312175	70312615	0.00616352	9.56152e-05	mergeATAC_peak52060	7.73143	chr6:70	1.46226	.	6.26918	ATAC > CNV	De novo increase
chr7	76201738	76202007	0.0230909	0.000677828	mergeATAC_peak56208	7.85821	chr7:76	1.59521	SRRM3	6.263	ATAC > CNV	De novo increase
chr6	33577101	33577439	0.0172708	0.000446439	mergeATAC_peak51111	7.94752	chr6:33	1.70976	.	6.23776	ATAC > CNV	De novo increase
chr7	150340418	150340597	0.0319838	0.00114994	mergeATAC_peak57960	7.88317	chr7:150	1.6507	.	6.23247	ATAC > CNV	De novo increase
chr1	118485741	118486058	0.00275264	2.97657e-05	mergeATAC_peak3236	7.37412	chr1:118	1.16198	.	6.21215	ATAC > CNV	De novo increase
chr13	79405724	79405933	0.0450121	0.00203801	mergeATAC_peak16601	7.60399	chr13:79	1.40152	RBM26;RBM26-AS1	6.20247	ATAC > CNV	De novo increase
chr7	83468292	83468601	0.00752145	0.000127548	mergeATAC_peak56391	7.44649	chr7:83	1.27446	.	6.17204	ATAC > CNV	De novo increase
chr8	101646353	101646552	0.0158618	0.000378507	mergeATAC_peak60059	11.3508	chr8:101	5.18747	.	6.16329	ATAC > CNV	De novo increase
chr1	220335698	220336058	0.00854669	0.000153123	mergeATAC_peak5944	7.76105	chr1:220	1.60411	.	6.15694	ATAC > CNV	De novo increase
chr9	96218172	96218449	0.0231303	0.000683871	mergeATAC_peak63165	7.77117	chr9:96	1.6157	.	6.15547	ATAC > CNV	De novo increase
chr20	53869413	53869701	0.000323451	1.87918e-06	mergeATAC_peak37073	7.68479	chr20:53	1.54604	.	6.13875	ATAC > CNV	De novo increase
chr4	25513936	25514300	0.0344199	0.00129266	mergeATAC_peak43926	7.60369	chr4:25	1.46522	.	6.13848	ATAC > CNV	De novo increase
chr8	47619669	47619890	0.0321458	0.00117043	mergeATAC_peak59136	7.38553	chr8:47	1.24856	.	6.13697	ATAC > CNV	De novo increase
chr7	95438497	95438803	0.00864596	0.000155691	mergeATAC_peak56625	7.56888	chr7:95	1.45652	.	6.11236	ATAC > CNV	De novo increase
chr9	110199679	110199987	0.0344199	0.00132198	mergeATAC_peak63507	7.21765	chr9:110	1.10931	.	6.10834	ATAC > CNV	De novo increase
chr8	128209912	128210312	0.0330993	0.00123032	mergeATAC_peak60934	10.4645	chr8:128	4.36839	.	6.09606	ATAC > CNV	De novo increase
chr9	113376814	113377210	0.00410149	5.24798e-05	mergeATAC_peak63612	7.77647	chr9:113	1.70907	HDHD3	6.0674	ATAC > CNV	De novo increase
chr17	8408508	8408797	0.00586392	8.86486e-05	mergeATAC_peak24377	7.68894	chr17:8	1.63259	.	6.05635	ATAC > CNV	De novo increase
chr9	119009261	119009672	0.0446653	0.00200261	mergeATAC_peak63758	7.59027	chr9:119	1.55404	.	6.03622	ATAC > CNV	De novo increase
chr6	112087429	112087730	0.0320912	0.00116015	mergeATAC_peak52900	7.66291	chr6:112	1.63447	TUBE1;FAM229B	6.02844	ATAC > CNV	De novo increase
chr8	128088590	128088942	0.00745978	0.000125259	mergeATAC_peak60915	10.3915	chr8:128	4.36839	.	6.02308	ATAC > CNV	De novo increase
chr20	54112329	54112839	0.000221982	1.18501e-06	mergeATAC_peak37090	7.06254	chr20:54	1.05804	.	6.0045	ATAC > CNV	De novo increase
chr17	1404707	1404945	0.0231303	0.000683874	mergeATAC_peak23938	7.45386	chr17:1	1.4726	.	5.98126	ATAC > CNV	De novo increase
chr17	10119647	10120223	2.30295e-05	7.74059e-08	mergeATAC_peak24427	7.03301	chr17:10	1.05241	.	5.9806	ATAC > CNV	De novo increase
chr11	35593183	35593551	0.0470618	0.00225764	mergeATAC_peak10368	7.08799	chr11:35	1.10803	.	5.97996	ATAC > CNV	De novo increase
chr8	140090298	140090700	0.00516677	7.2923e-05	mergeATAC_peak61291	9.52014	chr8:140	3.56306	.	5.95708	ATAC > CNV	De novo increase
chr5	150218212	150218454	0.00844143	0.000150595	mergeATAC_peak48907	8.08434	chr5:150	2.16571	.	5.91863	ATAC > CNV	De novo increase
chr1	165610943	165611225	0.0344199	0.00130108	mergeATAC_peak4390	8.28404	chr1:165	2.36698	.	5.91705	ATAC > CNV	De novo increase
chr9	33511057	33511257	0.0470618	0.00227543	mergeATAC_peak62103	7.21765	chr9:33	1.30418	SUGT1P1	5.91347	ATAC > CNV	De novo increase
chr7	6938334	6938614	0.00420745	5.43281e-05	mergeATAC_peak54686	7.45753	chr7:6	1.55343	FAM86LP	5.9041	ATAC > CNV	De novo increase
chr1	161723820	161724078	0.044831	0.00202024	mergeATAC_peak4291	8.63441	chr1:161	2.73056	.	5.90385	ATAC > CNV	De novo increase
chr17	8409250	8409399	0.00864596	0.000155691	mergeATAC_peak24378	7.53373	chr17:8	1.63259	.	5.90114	ATAC > CNV	De novo increase
chr1	167649233	167649688	0.0160604	0.000385346	mergeATAC_peak4442	7.75091	chr1:167	1.8505	.	5.90041	ATAC > CNV	De novo increase
chr7	117648660	117649017	0.00403706	5.1207e-05	mergeATAC_peak57276	7.49091	chr7:117	1.59715	.	5.89376	ATAC > CNV	De novo increase
chr8	129999976	130000176	0.0158618	0.000378507	mergeATAC_peak60986	10.384	chr8:130	4.50571	.	5.87827	ATAC > CNV	De novo increase
chr7	134420633	134420822	0.0450557	0.00205592	mergeATAC_peak57598	6.94616	chr7:134	1.06945	.	5.87671	ATAC > CNV	De novo increase
chr8	136445644	136446064	1.55735e-06	3.24492e-09	mergeATAC_peak61203	11.6915	chr8:136	5.87389	.	5.8176	ATAC > CNV	De novo increase
chr9	22030124	22030599	0.00132997	1.10037e-05	mergeATAC_peak61961	7.05039	chr9:22	1.23454	.	5.81584	ATAC > CNV	De novo increase
chr7	138325417	138325894	0.000830709	5.97596e-06	mergeATAC_peak57673	7.34355	chr7:138	1.53345	.	5.8101	ATAC > CNV	De novo increase
chr1	160160073	160160428	0.000331577	1.94656e-06	mergeATAC_peak4175	7.9261	chr1:160	2.11608	.	5.81003	ATAC > CNV	De novo increase
chr12	93127142	93127441	0.00613928	9.48655e-05	mergeATAC_peak14600	6.91352	chr12:93	1.11502	.	5.7985	ATAC > CNV	De novo increase
chr19	7149205	7149465	0.0172708	0.000441246	mergeATAC_peak29113	6.82966	chr19:7	1.0361	.	5.79356	ATAC > CNV	De novo increase
chr9	129964873	129965242	0.0112325	0.000222815	mergeATAC_peak64249	7.19105	chr9:129	1.43556	.	5.75548	ATAC > CNV	De novo increase
chr8	97635133	97635470	0.00181899	1.66819e-05	mergeATAC_peak59838	8.18594	chr8:97	2.43075	.	5.75519	ATAC > CNV	De novo increase
chr17	63425470	63425700	0.0172708	0.000446439	mergeATAC_peak26351	7.07778	chr17:63	1.32444	.	5.75335	ATAC > CNV	De novo increase
chr17	64712384	64712954	0.0012817	1.04679e-05	mergeATAC_peak26443	7.48035	chr17:64	1.73317	.	5.74718	ATAC > CNV	De novo increase
chr17	18377481	18377827	0.0470618	0.00229335	mergeATAC_peak24683	6.99589	chr17:18	1.2526	EVPLL	5.74329	ATAC > CNV	De novo increase
chr2	14781182	14781470	0.0113385	0.000226858	mergeATAC_peak31387	6.84678	chr2:14	1.10738	.	5.7394	ATAC > CNV	De novo increase
chr11	460525	461068	0.0172708	0.000444619	mergeATAC_peak9446	6.83547	chr11:0	1.09829	.	5.73718	ATAC > CNV	De novo increase
chr17	75696981	75697162	0.0450557	0.00205592	mergeATAC_peak26825	7.30086	chr17:75	1.56766	.	5.73321	ATAC > CNV	De novo increase
chr17	921105	921450	0.00081812	5.87296e-06	mergeATAC_peak23892	7.02323	chr17:0	1.31121	.	5.71202	ATAC > CNV	De novo increase
chr6	34757329	34757603	0.0450121	0.00203801	mergeATAC_peak51167	6.83905	chr6:34	1.12762	SNRPC	5.71142	ATAC > CNV	De novo increase
chr21	32368497	32368835	0.0244133	0.000784814	mergeATAC_peak37711	7.28044	chr21:32	1.57276	.	5.70768	ATAC > CNV	De novo increase
chr8	133493647	133494096	1.93097e-09	1.4684e-12	mergeATAC_peak61087	11.8978	chr8:133	6.19438	.	5.70347	ATAC > CNV	De novo increase
chr7	291902	292126	0.0344199	0.00134319	mergeATAC_peak54401	7.10182	chr7:0	1.40807	FOXL3	5.69375	ATAC > CNV	De novo increase
chr2	102603913	102604223	0.0344199	0.00134319	mergeATAC_peak33185	6.89966	chr2:102	1.21107	.	5.68859	ATAC > CNV	De novo increase
chr20	63894811	63895096	0.00417701	5.38714e-05	mergeATAC_peak37332	7.24982	chr20:63	1.56202	DNAJC5	5.6878	ATAC > CNV	De novo increase
chr1	164611838	164612229	0.0344199	0.0013115	mergeATAC_peak4354	7.73596	chr1:164	2.05365	.	5.68231	ATAC > CNV	De novo increase
chr2	65316071	65316377	0.0344199	0.00130108	mergeATAC_peak32441	6.71197	chr2:65	1.05206	.	5.65991	ATAC > CNV	De novo increase
chr9	129052564	129052955	0.00197049	1.88205e-05	mergeATAC_peak64186	7.09085	chr9:129	1.43556	.	5.65529	ATAC > CNV	De novo increase
chr17	74968283	74968759	0.00352386	4.20177e-05	mergeATAC_peak26757	7.03461	chr17:74	1.38106	.	5.65355	ATAC > CNV	De novo increase
chr17	51166185	51166425	0.0244133	0.000766063	mergeATAC_peak26029	7.0606	chr17:51	1.40843	NME2	5.65217	ATAC > CNV	De novo increase
chr1	157196993	157197191	0.00761095	0.000129876	mergeATAC_peak4080	7.60516	chr1:157	1.96753	.	5.63763	ATAC > CNV	De novo increase
chr8	126553810	126554053	0.00179689	1.63972e-05	mergeATAC_peak60845	9.21916	chr8:126	3.59075	.	5.62842	ATAC > CNV	De novo increase
chr7	17542635	17542902	0.0450121	0.00203801	mergeATAC_peak54930	7.53011	chr7:17	1.90296	.	5.62715	ATAC > CNV	De novo increase
chr1	210112849	210113264	0.0344199	0.00132198	mergeATAC_peak5690	6.87476	chr1:210	1.27287	.	5.6019	ATAC > CNV	De novo increase
chr8	114217301	114217559	0.0222149	0.000636875	mergeATAC_peak60408	12.6591	chr8:114	7.06545	.	5.59369	ATAC > CNV	De novo increase
chr17	19248968	19249310	0.016317	0.00039582	mergeATAC_peak24709	6.88576	chr17:19	1.29784	EPN2	5.58793	ATAC > CNV	De novo increase
chr9	76143732	76144175	0.000140002	6.72853e-07	mergeATAC_peak62612	6.92631	chr9:76	1.34564	.	5.58067	ATAC > CNV	De novo increase
chr9	129359792	129360261	0.0344199	0.0013115	mergeATAC_peak64208	7.01118	chr9:129	1.43556	.	5.57562	ATAC > CNV	De novo increase
chr1	109499108	109499378	0.00270206	2.90133e-05	mergeATAC_peak2871	8.44538	chr1:109	2.87466	.	5.57072	ATAC > CNV	De novo increase
chr7	35917044	35917279	0.0244133	0.0007856	mergeATAC_peak55382	6.90537	chr7:35	1.33974	.	5.56562	ATAC > CNV	De novo increase
chr1	245039904	245040247	0.0230909	0.000677828	mergeATAC_peak6718	6.85899	chr1:245	1.29623	.	5.56276	ATAC > CNV	De novo increase
chr8	119144067	119144335	0.0321458	0.00117043	mergeATAC_peak60545	8.06347	chr8:119	2.50998	.	5.55349	ATAC > CNV	De novo increase
chr8	137726053	137726239	0.0315601	0.00111983	mergeATAC_peak61217	10.9924	chr8:137	5.43939	.	5.55302	ATAC > CNV	De novo increase
chr6	160664209	160664425	0.0470618	0.00220503	mergeATAC_peak54134	7.54362	chr6:160	2.00325	LPA	5.54037	ATAC > CNV	De novo increase
chr6	106790950	106791290	0.00413942	5.33237e-05	mergeATAC_peak52739	7.24398	chr6:106	1.70797	.	5.53601	ATAC > CNV	De novo increase
chr21	25385961	25386237	0.0470618	0.00223998	mergeATAC_peak37551	7.42765	chr21:25	1.89433	.	5.53332	ATAC > CNV	De novo increase
chr5	164472213	164472542	1.4662e-05	4.37066e-08	mergeATAC_peak49307	8.34337	chr5:164	2.82042	.	5.52295	ATAC > CNV	De novo increase
chr7	36923747	36924201	0.00587786	8.93957e-05	mergeATAC_peak55418	7.23855	chr7:36	1.71592	.	5.52263	ATAC > CNV	De novo increase
chr8	141117128	141117429	0.000779786	5.57405e-06	mergeATAC_peak61347	9.5895	chr8:141	4.07364	DENND3	5.51586	ATAC > CNV	De novo increase
chr1	203462867	203463191	0.00877392	0.000159196	mergeATAC_peak5359	7.12316	chr1:203	1.6124	.	5.51076	ATAC > CNV	De novo increase
chr17	61183867	61184158	0.0126346	0.000274751	mergeATAC_peak26291	6.53878	chr17:61	1.03029	.	5.50849	ATAC > CNV	De novo increase
chr1	147084574	147085147	0.00587786	8.93957e-05	mergeATAC_peak3450	6.90631	chr1:147	1.4011	SSBL4P;RNVU1-8	5.50521	ATAC > CNV	De novo increase
chr8	129995157	129995475	1.99735e-05	6.5008e-08	mergeATAC_peak60984	10.1431	chr8:129	4.64042	.	5.5027	ATAC > CNV	De novo increase
chr1	151650665	151650925	0.00849517	0.000151854	mergeATAC_peak3704	8.46182	chr1:151	2.96475	.	5.49707	ATAC > CNV	De novo increase
chr6	136968225	136968435	0.0323214	0.00119126	mergeATAC_peak53428	6.64228	chr6:136	1.17446	.	5.46782	ATAC > CNV	De novo increase
chr4	153146128	153146493	0.0344199	0.00135391	mergeATAC_peak45691	6.61097	chr4:153	1.15582	.	5.45516	ATAC > CNV	De novo increase
chr8	127919021	127919681	8.59788e-12	3.00758e-15	mergeATAC_peak60907	9.25132	chr8:127	3.79706	.	5.45426	ATAC > CNV	De novo increase
chr8	143334452	143334644	0.0320912	0.00116015	mergeATAC_peak61465	8.68027	chr8:143	3.23947	TOP1MT	5.44079	ATAC > CNV	De novo increase
chr13	99312360	99312811	0.000601531	4.07114e-06	mergeATAC_peak16906	7.02766	chr13:99	1.5973	UBAC2	5.43036	ATAC > CNV	De novo increase
chr11	12071569	12071950	0.0470618	0.0023114	mergeATAC_peak9877	6.6714	chr11:12	1.24173	.	5.42968	ATAC > CNV	De novo increase
chr10	97848953	97849256	0.00554773	8.02405e-05	mergeATAC_peak8664	6.59966	chr10:97	1.17323	GOLGA7B-DT;GOLGA7B	5.42643	ATAC > CNV	De novo increase
chr6	32432064	32432299	0.0172708	0.000448016	mergeATAC_peak51000	7.11176	chr6:32	1.68896	.	5.4228	ATAC > CNV	De novo increase
chr5	170534105	170534635	0.00193232	1.83678e-05	mergeATAC_peak49408	7.29389	chr5:170	1.87782	.	5.41607	ATAC > CNV	De novo increase
chr5	168329418	168329656	0.00273696	2.95129e-05	mergeATAC_peak49349	8.38322	chr5:168	2.96942	.	5.41379	ATAC > CNV	De novo increase
chr16	57998569	57998723	0.0321458	0.00117043	mergeATAC_peak23026	7.35188	chr16:57	1.94669	USB1	5.4052	ATAC > CNV	De novo increase
chr5	179167185	179167414	0.0230431	0.000671831	mergeATAC_peak49717	8.2017	chr5:179	2.79799	.	5.40371	ATAC > CNV	De novo increase
chr8	120060653	120061086	1.47648e-05	4.49114e-08	mergeATAC_peak60578	7.10353	chr8:120	1.71206	COL14A1	5.39148	ATAC > CNV	De novo increase
chr7	27897004	27897346	0.00844143	0.000150595	mergeATAC_peak55183	6.59916	chr7:27	1.21837	.	5.38079	ATAC > CNV	De novo increase
chr9	136785198	136785388	0.0450121	0.00203801	mergeATAC_peak64565	6.91844	chr9:136	1.54391	.	5.37454	ATAC > CNV	De novo increase
chr8	141944907	141945344	4.41221e-06	1.12736e-08	mergeATAC_peak61399	9.42573	chr8:141	4.07364	.	5.35209	ATAC > CNV	De novo increase
chr7	151003515	151004074	9.74717e-05	4.22495e-07	mergeATAC_peak57985	7.25543	chr7:151	1.92753	.	5.3279	ATAC > CNV	De novo increase
chr6	154293155	154293373	0.0470618	0.00229335	mergeATAC_peak53898	6.6026	chr6:154	1.29934	.	5.30326	ATAC > CNV	De novo increase
chr1	218547954	218548200	0.0344199	0.00133255	mergeATAC_peak5916	6.86818	chr1:218	1.56871	.	5.29946	ATAC > CNV	De novo increase
chr5	172758111	172758450	0.0123814	0.000266079	mergeATAC_peak49482	7.5239	chr5:172	2.23566	ENSG00000253295	5.28824	ATAC > CNV	De novo increase
chr1	161258571	161258828	0.0058325	8.79075e-05	mergeATAC_peak4250	8.00249	chr1:161	2.73056	PCP4L1	5.27193	ATAC > CNV	De novo increase
chr17	75693578	75693937	0.0244133	0.000759906	mergeATAC_peak26824	6.83321	chr17:75	1.56766	.	5.26555	ATAC > CNV	De novo increase
chr20	45419490	45419915	0.0172708	0.000446439	mergeATAC_peak36742	6.99535	chr20:45	1.75187	PIGT	5.24349	ATAC > CNV	De novo increase
chr1	152908301	152908668	0.0244133	0.000784814	mergeATAC_peak3770	6.48784	chr1:152	1.2529	IVL	5.23494	ATAC > CNV	De novo increase
chr17	64340190	64340557	0.0244133	0.000772267	mergeATAC_peak26426	6.96614	chr17:64	1.73317	.	5.23297	ATAC > CNV	De novo increase
chr9	69506451	69506671	0.0450557	0.00205592	mergeATAC_peak62429	6.80095	chr9:69	1.56843	.	5.23251	ATAC > CNV	De novo increase
chr19	10315652	10316187	0.0244133	0.000784814	mergeATAC_peak29251	6.39032	chr19:10	1.15916	FDX2;ENSG00000167807	5.23116	ATAC > CNV	De novo increase
chr1	234606261	234606456	0.0160604	0.000385346	mergeATAC_peak6447	7.30877	chr1:234	2.07983	ENSG00000228830	5.22894	ATAC > CNV	De novo increase
chr7	45136221	45136446	0.00434079	5.63798e-05	mergeATAC_peak55620	6.49086	chr7:45	1.26796	.	5.2229	ATAC > CNV	De novo increase
chr8	100947904	100948269	1.55735e-06	3.24401e-09	mergeATAC_peak60003	12.8842	chr8:100	7.66417	YWHAZ	5.22007	ATAC > CNV	De novo increase
chr1	146335656	146335992	0.00275738	2.98589e-05	mergeATAC_peak3430	6.65205	chr1:146	1.43514	.	5.21691	ATAC > CNV	De novo increase
chr16	25823945	25824289	0.000243353	1.35091e-06	mergeATAC_peak22310	6.68622	chr16:25	1.47725	.	5.20897	ATAC > CNV	De novo increase
chr1	234894382	234894699	0.0123814	0.000266079	mergeATAC_peak6478	7.28511	chr1:234	2.07983	.	5.20529	ATAC > CNV	De novo increase
chr17	2338014	2338272	0.0112845	0.000224828	mergeATAC_peak24013	6.69245	chr17:2	1.49131	SGSM2	5.20114	ATAC > CNV	De novo increase
chr9	132895307	132895864	0.0445717	0.00198621	mergeATAC_peak64353	6.26846	chr9:132	1.06766	.	5.2008	ATAC > CNV	De novo increase
chr16	30437793	30438095	0.0244133	0.000768149	mergeATAC_peak22482	6.89873	chr16:30	1.71654	.	5.18219	ATAC > CNV	De novo increase
chr17	50503980	50504508	9.15524e-05	3.89875e-07	mergeATAC_peak25969	7.50217	chr17:50	2.32619	.	5.17598	ATAC > CNV	De novo increase
chr8	134838667	134839271	1.3518e-08	1.25412e-11	mergeATAC_peak61154	11.7092	chr8:134	6.53886	NCRNA00250	5.17032	ATAC > CNV	De novo increase
chr8	138102871	138103060	0.0224598	0.000648334	mergeATAC_peak61224	10.6938	chr8:138	5.52961	.	5.16419	ATAC > CNV	De novo increase
chr21	44911392	44911861	0.00122677	9.90728e-06	mergeATAC_peak38279	6.49378	chr21:44	1.33215	ITGB2	5.16164	ATAC > CNV	De novo increase
chr8	116874367	116874580	0.0450121	0.00203801	mergeATAC_peak60469	7.28796	chr8:116	2.13544	RAD21;MIR3610;RAD21-AS1	5.15253	ATAC > CNV	De novo increase
chr5	150208941	150209239	0.0162431	0.000392299	mergeATAC_peak48906	7.31445	chr5:150	2.16571	.	5.14874	ATAC > CNV	De novo increase
chr9	93154377	93154572	0.0450557	0.00204694	mergeATAC_peak63029	6.67303	chr9:93	1.52556	.	5.14747	ATAC > CNV	De novo increase
chr9	118993224	118993535	0.0450121	0.00203801	mergeATAC_peak63756	6.60417	chr9:118	1.46289	.	5.14128	ATAC > CNV	De novo increase
chr13	98650425	98650749	0.0344199	0.00133255	mergeATAC_peak16879	6.5211	chr13:98	1.38214	.	5.13896	ATAC > CNV	De novo increase
chr7	17276491	17276758	0.0244133	0.000778517	mergeATAC_peak54913	7.02868	chr7:17	1.90296	.	5.12571	ATAC > CNV	De novo increase
chr6	14274523	14274810	0.0184177	0.000501961	mergeATAC_peak50276	6.18803	chr6:14	1.06987	.	5.11816	ATAC > CNV	De novo increase
chr5	163505804	163506009	0.00844196	0.000150733	mergeATAC_peak49287	8.46373	chr5:163	3.35056	MAT2B	5.11317	ATAC > CNV	De novo increase
chr21	33402792	33403023	0.0450557	0.00205592	mergeATAC_peak37778	6.61309	chr21:33	1.50131	ENSG00000289939;IFNGR2	5.11178	ATAC > CNV	De novo increase
chr16	22007581	22007830	0.0344199	0.00138655	mergeATAC_peak22190	6.51962	chr16:22	1.40837	MOSMO;ENSG00000275445	5.11125	ATAC > CNV	De novo increase
chr1	205353543	205353831	0.00602554	9.26499e-05	mergeATAC_peak5442	6.85109	chr1:205	1.74122	.	5.10987	ATAC > CNV	De novo increase
chr5	65861863	65862321	0.00434129	5.65185e-05	mergeATAC_peak47356	6.19877	chr5:65	1.09282	.	5.10596	ATAC > CNV	De novo increase
chr2	9809025	9809298	0.0452143	0.00207398	mergeATAC_peak31278	6.22382	chr2:9	1.11865	.	5.10517	ATAC > CNV	De novo increase
chr1	151300955	151301146	0.032241	0.0011808	mergeATAC_peak3671	8.06244	chr1:151	2.96475	RN7SL444P;PI4KB	5.09769	ATAC > CNV	De novo increase
chr8	138165751	138165985	2.59075e-06	6.02856e-09	mergeATAC_peak61226	10.626	chr8:138	5.52961	.	5.09638	ATAC > CNV	De novo increase
chr13	79382970	79383228	0.0324783	0.0012018	mergeATAC_peak16595	6.48925	chr13:79	1.40152	.	5.08773	ATAC > CNV	De novo increase
chr11	2463350	2463668	0.0323214	0.00119126	mergeATAC_peak9580	6.12244	chr11:2	1.03958	.	5.08285	ATAC > CNV	De novo increase
chr7	36295051	36295432	0.0052055	7.42613e-05	mergeATAC_peak55397	6.79082	chr7:36	1.71592	.	5.0749	ATAC > CNV	De novo increase
chr8	100345222	100345532	0.0444615	0.00196777	mergeATAC_peak59948	12.7382	chr8:100	7.66417	.	5.07408	ATAC > CNV	De novo increase
chr17	17440460	17440725	0.0230909	0.000677828	mergeATAC_peak24619	6.82932	chr17:17	1.7682	.	5.06112	ATAC > CNV	De novo increase
chr6	52176551	52176798	0.0450557	0.00205592	mergeATAC_peak51787	6.8656	chr6:52	1.80687	.	5.05872	ATAC > CNV	De novo increase
chr1	108817158	108817390	0.0125277	0.000270556	mergeATAC_peak2821	6.6511	chr1:108	1.60047	AKNAD1	5.05063	ATAC > CNV	De novo increase
chr7	100008571	100008836	0.0344199	0.0013115	mergeATAC_peak56788	6.85123	chr7:100	1.81637	.	5.03486	ATAC > CNV	De novo increase
chr8	139324259	139324580	0.0172708	0.000439208	mergeATAC_peak61267	8.69975	chr8:139	3.67788	.	5.02187	ATAC > CNV	De novo increase
chr6	31187895	31188120	0.016317	0.00039582	mergeATAC_peak50906	7.06418	chr6:31	2.0466	.	5.01758	ATAC > CNV	De novo increase
chr5	160119714	160120048	0.0040665	5.16422e-05	mergeATAC_peak49207	7.88139	chr5:160	2.86412	PWWP2A	5.01727	ATAC > CNV	De novo increase
chr8	101027296	101027754	8.10661e-05	3.4152e-07	mergeATAC_peak60007	10.2013	chr8:101	5.18747	.	5.01388	ATAC > CNV	De novo increase
chr17	41009087	41009606	0.0244133	0.000778517	mergeATAC_peak25384	6.50112	chr17:41	1.49656	KRTAP3-1	5.00457	ATAC > CNV	De novo increase
chr6	33983096	33983479	0.0470618	0.00220503	mergeATAC_peak51134	6.68334	chr6:33	1.70976	.	4.97358	ATAC > CNV	De novo increase
chr19	37469196	37469466	0.045301	0.00209218	mergeATAC_peak30055	6.58868	chr19:37	1.63227	ZNF570;ZNF569	4.9564	ATAC > CNV	De novo increase
chr7	2826257	2826649	0.0231303	0.000683874	mergeATAC_peak54535	6.09347	chr7:2	1.14176	.	4.95171	ATAC > CNV	De novo increase
chr1	173175462	173175890	0.0029354	3.22331e-05	mergeATAC_peak4631	6.30302	chr1:173	1.36715	ENSG00000226375	4.93587	ATAC > CNV	De novo increase
chr9	133364529	133364945	0.000104986	4.66244e-07	mergeATAC_peak64391	6.4136	chr9:133	1.47955	.	4.93405	ATAC > CNV	De novo increase
chr7	116776714	116776883	0.0457912	0.00212064	mergeATAC_peak57245	6.71609	chr7:116	1.78889	.	4.9272	ATAC > CNV	De novo increase
chr20	58196659	58196980	0.0323214	0.00119126	mergeATAC_peak37177	6.02967	chr20:58	1.11434	.	4.91534	ATAC > CNV	De novo increase
chr8	99012665	99013080	0.000197724	1.04048e-06	mergeATAC_peak59909	8.09852	chr8:99	3.19132	VPS13B-DT;VPS13B	4.90719	ATAC > CNV	De novo increase
chr16	23557091	23557466	0.012584	0.000272728	mergeATAC_peak22251	6.34612	chr16:23	1.44244	UBFD1;EARS2	4.90367	ATAC > CNV	De novo increase
chr8	113454975	113455680	2.97321e-09	2.53228e-12	mergeATAC_peak60398	12.6309	chr8:113	7.72913	.	4.90172	ATAC > CNV	De novo increase
chr16	4882698	4883009	0.0452143	0.00207398	mergeATAC_peak21719	6.64439	chr16:4	1.74725	.	4.89714	ATAC > CNV	De novo increase
chr8	138727452	138727731	0.000123055	5.7456e-07	mergeATAC_peak61252	10.4213	chr8:138	5.52961	.	4.89169	ATAC > CNV	De novo increase
chr9	90064316	90064624	0.00450961	5.96014e-05	mergeATAC_peak62926	5.95232	chr9:90	1.06585	.	4.88647	ATAC > CNV	De novo increase
chr9	101342693	101342979	0.032241	0.0011808	mergeATAC_peak63328	6.50101	chr9:101	1.61535	.	4.88566	ATAC > CNV	De novo increase
chr11	130645719	130646070	0.0247327	0.000817014	mergeATAC_peak12571	5.93059	chr11:130	1.05442	.	4.87617	ATAC > CNV	De novo increase
chr14	103292878	103293096	0.0247326	0.000815505	mergeATAC_peak19070	6.03968	chr14:103	1.17611	.	4.86357	ATAC > CNV	De novo increase
chr16	15030333	15030482	0.0128843	0.000285507	mergeATAC_peak22003	5.9395	chr16:15	1.07678	.	4.86272	ATAC > CNV	De novo increase
chr6	35188907	35189252	0.0177293	0.000468797	mergeATAC_peak51182	6.1501	chr6:35	1.29749	.	4.85262	ATAC > CNV	De novo increase
chr8	100824641	100824945	6.30936e-06	1.68887e-08	mergeATAC_peak59993	12.5122	chr8:100	7.66417	.	4.84807	ATAC > CNV	De novo increase
chr5	178585662	178585820	0.000521216	3.38488e-06	mergeATAC_peak49700	7.99866	chr5:178	3.15196	.	4.8467	ATAC > CNV	De novo increase
chr20	53917177	53917600	0.000147448	7.28817e-07	mergeATAC_peak37079	6.39041	chr20:53	1.54604	.	4.84437	ATAC > CNV	De novo increase
chr8	129753638	129753920	0.008272	0.000143246	mergeATAC_peak60972	9.48385	chr8:129	4.64042	GSDMC	4.84343	ATAC > CNV	De novo increase
chr8	143355026	143355298	0.00401265	5.07753e-05	mergeATAC_peak61469	8.07753	chr8:143	3.23947	TOP1MT	4.83806	ATAC > CNV	De novo increase
chr20	56554837	56555182	0.0177293	0.000468804	mergeATAC_peak37126	6.05921	chr20:56	1.22326	.	4.83595	ATAC > CNV	De novo increase
chr11	27456083	27456434	0.0231303	0.000683874	mergeATAC_peak10195	6.13056	chr11:27	1.29969	.	4.83087	ATAC > CNV	De novo increase
chr13	99477587	99477971	0.00133202	1.10602e-05	mergeATAC_peak16916	6.42032	chr13:99	1.5973	.	4.82302	ATAC > CNV	De novo increase
chr5	43058200	43058612	0.00198338	1.89738e-05	mergeATAC_peak47007	6.62134	chr5:43	1.79857	.	4.82277	ATAC > CNV	De novo increase
chr17	38363080	38363435	0.0470618	0.00236632	mergeATAC_peak25172	5.94238	chr17:38	1.1319	.	4.81048	ATAC > CNV	De novo increase
chr5	150790165	150790565	0.032241	0.0011808	mergeATAC_peak48942	6.97508	chr5:150	2.16571	.	4.80937	ATAC > CNV	De novo increase
chr7	138303808	138304282	0.00597974	9.16728e-05	mergeATAC_peak57672	6.33985	chr7:138	1.53345	.	4.8064	ATAC > CNV	De novo increase
chr17	8409701	8409850	0.0126346	0.000274979	mergeATAC_peak24379	6.43284	chr17:8	1.63259	.	4.80025	ATAC > CNV	De novo increase
chr17	4329872	4330257	0.0177293	0.00046891	mergeATAC_peak24096	6.20243	chr17:4	1.40713	.	4.7953	ATAC > CNV	De novo increase
chr20	62500223	62500470	0.0470618	0.00236633	mergeATAC_peak37258	6.18225	chr20:62	1.39476	.	4.78749	ATAC > CNV	De novo increase
chr17	57032351	57032610	0.0344199	0.00133134	mergeATAC_peak26127	6.3447	chr17:57	1.57139	.	4.77331	ATAC > CNV	De novo increase
chr6	167791490	167791858	0.0052055	7.42613e-05	mergeATAC_peak54274	6.14847	chr6:167	1.38444	.	4.76404	ATAC > CNV	De novo increase
chr1	109792177	109792469	0.0172965	0.000453781	mergeATAC_peak2895	7.63186	chr1:109	2.87466	.	4.7572	ATAC > CNV	De novo increase
chr16	29765040	29765737	0.000145441	7.14477e-07	mergeATAC_peak22420	5.96225	chr16:29	1.20858	.	4.75367	ATAC > CNV	De novo increase
chr9	133328950	133329170	0.0323214	0.00119126	mergeATAC_peak64385	6.23116	chr9:133	1.47955	.	4.75161	ATAC > CNV	De novo increase
chr8	126537825	126538147	3.02949e-06	7.32597e-09	mergeATAC_peak60841	8.33426	chr8:126	3.59075	.	4.74351	ATAC > CNV	De novo increase
chr21	33127380	33127613	0.0344199	0.00134319	mergeATAC_peak37756	6.24336	chr21:33	1.50131	.	4.74204	ATAC > CNV	De novo increase
chr1	109478888	109479071	0.00860345	0.000154402	mergeATAC_peak2866	7.61208	chr1:109	2.87466	.	4.73741	ATAC > CNV	De novo increase
chr8	122300179	122300662	0.032241	0.0011808	mergeATAC_peak60636	6.3982	chr8:122	1.66942	.	4.72878	ATAC > CNV	De novo increase
chr8	127911278	127911764	0.000134044	6.36063e-07	mergeATAC_peak60906	8.52457	chr8:127	3.79706	PVT1	4.72752	ATAC > CNV	De novo increase
chr2	9339622	9340239	0.00013965	6.66911e-07	mergeATAC_peak31254	5.84344	chr2:9	1.11865	.	4.72479	ATAC > CNV	De novo increase
chr1	149762281	149762623	0.0344199	0.00136471	mergeATAC_peak3555	6.28923	chr1:149	1.57364	.	4.71559	ATAC > CNV	De novo increase
chr8	128153044	128153455	5.41441e-07	9.74183e-10	mergeATAC_peak60921	9.06781	chr8:128	4.36839	.	4.69942	ATAC > CNV	De novo increase
chr1	207205049	207205409	0.0123814	0.000266079	mergeATAC_peak5581	6.54751	chr1:207	1.85521	.	4.6923	ATAC > CNV	De novo increase
chr16	11429865	11430300	0.00860345	0.000154402	mergeATAC_peak21885	6.55881	chr16:11	1.87657	.	4.68224	ATAC > CNV	De novo increase
chr5	155540632	155541035	0.012584	0.000272727	mergeATAC_peak49081	6.69745	chr5:155	2.01986	.	4.6776	ATAC > CNV	De novo increase
chr8	138114376	138114613	8.03346e-05	3.36957e-07	mergeATAC_peak61225	10.1921	chr8:138	5.52961	.	4.66251	ATAC > CNV	De novo increase
chr8	143026265	143026598	1.50689e-05	4.60654e-08	mergeATAC_peak61443	7.89767	chr8:143	3.23947	ENSG00000291308	4.65819	ATAC > CNV	De novo increase
chr7	44618734	44619082	0.018081	0.000487012	mergeATAC_peak55596	6.13501	chr7:44	1.48333	.	4.65168	ATAC > CNV	De novo increase
chr13	95661100	95661293	0.0245077	0.00080399	mergeATAC_peak16802	6.34782	chr13:95	1.69799	.	4.64983	ATAC > CNV	De novo increase
chr8	138481921	138482074	0.008272	0.000143246	mergeATAC_peak61232	10.1743	chr8:138	5.52961	.	4.6447	ATAC > CNV	De novo increase
chr8	98913349	98913923	2.99126e-09	2.59315e-12	mergeATAC_peak59895	10.0226	chr8:98	5.38308	.	4.63956	ATAC > CNV	De novo increase
chr20	53611539	53611887	0.00896126	0.00016423	mergeATAC_peak37046	6.17924	chr20:53	1.54604	.	4.6332	ATAC > CNV	De novo increase
chr8	126545087	126545553	1.42477e-08	1.36516e-11	mergeATAC_peak60842	8.22203	chr8:126	3.59075	.	4.63128	ATAC > CNV	De novo increase
chr6	36914201	36914543	0.0244133	0.000784814	mergeATAC_peak51270	6.16544	chr6:36	1.5405	.	4.62494	ATAC > CNV	De novo increase
chr6	150865446	150865733	0.0244133	0.000778517	mergeATAC_peak53832	6.14069	chr6:150	1.5195	MTHFD1L	4.62119	ATAC > CNV	De novo increase
chr17	15659674	15660015	0.0128843	0.000285507	mergeATAC_peak24526	5.85136	chr17:15	1.2387	.	4.61266	ATAC > CNV	De novo increase
chr3	195859363	195859605	0.00884823	0.000160948	mergeATAC_peak43329	5.7065	chr3:195	1.09388	LINC01983	4.61262	ATAC > CNV	De novo increase
chr3	98585324	98585619	0.0162431	0.000392298	mergeATAC_peak41336	5.89547	chr3:98	1.28929	CPOX;ENSG00000285635	4.60618	ATAC > CNV	De novo increase
chr13	109793949	109794579	0.000408437	2.52083e-06	mergeATAC_peak17097	5.95856	chr13:109	1.3611	.	4.59746	ATAC > CNV	De novo increase
chr8	111934464	111934698	0.00234741	2.39557e-05	mergeATAC_peak60374	9.11091	chr8:111	4.51602	.	4.59489	ATAC > CNV	De novo increase
chr9	93467422	93467893	0.0244133	0.000791158	mergeATAC_peak63043	6.12032	chr9:93	1.52556	.	4.59476	ATAC > CNV	De novo increase
chr11	134266902	134267326	0.0047012	6.32459e-05	mergeATAC_peak12615	5.61568	chr11:134	1.02896	.	4.58672	ATAC > CNV	De novo increase
chr16	30437332	30437700	0.0245077	0.00080399	mergeATAC_peak22481	6.29639	chr16:30	1.71654	.	4.57985	ATAC > CNV	De novo increase
chr1	202860597	202861030	0.0470618	0.00238491	mergeATAC_peak5318	6.13716	chr1:202	1.56725	ENSG00000291234;ACTG1P25	4.56991	ATAC > CNV	De novo increase
chr9	111896572	111896805	0.00307074	3.4233e-05	mergeATAC_peak63543	5.96328	chr9:111	1.40682	UGCG	4.55646	ATAC > CNV	De novo increase
chr1	225694193	225694428	0.0323214	0.00119126	mergeATAC_peak6128	6.11937	chr1:225	1.57633	.	4.54304	ATAC > CNV	De novo increase
chr8	126326196	126326531	0.00185422	1.71178e-05	mergeATAC_peak60831	8.13308	chr8:126	3.59075	ENSG00000244791	4.54233	ATAC > CNV	De novo increase
chr13	111214409	111214734	0.0128498	0.000283325	mergeATAC_peak17157	5.83989	chr13:111	1.29827	.	4.54163	ATAC > CNV	De novo increase
chr21	32387174	32387567	0.00280421	3.05367e-05	mergeATAC_peak37715	6.11363	chr21:32	1.57276	.	4.54087	ATAC > CNV	De novo increase
chr20	53805863	53806152	0.00761095	0.000129876	mergeATAC_peak37066	6.07071	chr20:53	1.54604	.	4.52467	ATAC > CNV	De novo increase
chr17	15502876	15503119	0.0470618	0.00236377	mergeATAC_peak24520	5.74181	chr17:15	1.2387	TVP23C-CDRT4	4.50311	ATAC > CNV	De novo increase
chr10	113982785	113983144	0.0344199	0.00137108	mergeATAC_peak9051	5.52569	chr10:113	1.03019	.	4.4955	ATAC > CNV	De novo increase
chr1	149475875	149476147	0.00896126	0.00016423	mergeATAC_peak3543	6.05972	chr1:149	1.57364	NBPF19	4.48608	ATAC > CNV	De novo increase
chr17	82684130	82684508	0.0246256	0.000810478	mergeATAC_peak27308	6.17524	chr17:82	1.69737	.	4.47787	ATAC > CNV	De novo increase
chr8	129786447	129786719	0.00184749	1.69713e-05	mergeATAC_peak60973	9.11681	chr8:129	4.64042	GSDMC	4.47639	ATAC > CNV	De novo increase
chr1	226702967	226703345	0.0244133	0.000791158	mergeATAC_peak6195	6.12966	chr1:226	1.65341	.	4.47625	ATAC > CNV	De novo increase
chr20	41340636	41341025	0.018081	0.000487012	mergeATAC_peak36640	5.83692	chr20:41	1.36378	LPIN3	4.47313	ATAC > CNV	De novo increase
chr1	244327535	244327834	0.00873304	0.000158299	mergeATAC_peak6685	6.46585	chr1:244	2.01739	.	4.44846	ATAC > CNV	De novo increase
chr5	34509389	34509698	0.0020002	1.91651e-05	mergeATAC_peak46794	6.32305	chr5:34	1.87881	.	4.44424	ATAC > CNV	De novo increase
chr8	101080618	101081094	7.51694e-05	3.05246e-07	mergeATAC_peak60011	9.62883	chr8:101	5.18747	.	4.44137	ATAC > CNV	De novo increase
chr21	44882629	44883087	0.0344199	0.00136471	mergeATAC_peak38277	5.76244	chr21:44	1.33215	.	4.4303	ATAC > CNV	De novo increase
chr17	118061	118210	0.0344199	0.00140161	mergeATAC_peak23846	5.73668	chr17:0	1.31121	ENSG00000280136	4.42547	ATAC > CNV	De novo increase
chr17	8631405	8631659	0.0344199	0.00134319	mergeATAC_peak24387	6.05679	chr17:8	1.63259	MYH10	4.4242	ATAC > CNV	De novo increase
chr16	2800024	2800296	0.016317	0.00039582	mergeATAC_peak21556	6.11716	chr16:2	1.69493	.	4.42223	ATAC > CNV	De novo increase
chr6	15504841	15505279	0.0344199	0.00137559	mergeATAC_peak50311	5.49668	chr6:15	1.08704	.	4.40964	ATAC > CNV	De novo increase
chr11	134402478	134402743	0.0452143	0.00207398	mergeATAC_peak12628	5.43304	chr11:134	1.02896	.	4.40408	ATAC > CNV	De novo increase
chr1	9907557	9907768	0.0324783	0.0012018	mergeATAC_peak389	5.40548	chr1:9	1.00701	.	4.39846	ATAC > CNV	De novo increase
chr2	127825982	127826475	0.0128498	0.00028326	mergeATAC_peak33659	5.64596	chr2:127	1.24856	.	4.3974	ATAC > CNV	De novo increase
chr12	47038199	47038669	0.0344199	0.00135391	mergeATAC_peak13544	5.67097	chr12:47	1.27478	.	4.39619	ATAC > CNV	De novo increase
chr19	45338753	45338942	0.0323214	0.00119126	mergeATAC_peak30480	5.45709	chr19:45	1.0633	.	4.39379	ATAC > CNV	De novo increase
chr17	5584395	5584616	0.0450557	0.00205592	mergeATAC_peak24175	5.71119	chr17:5	1.31842	NLRP1	4.39276	ATAC > CNV	De novo increase
chr8	79684649	79684911	0.0344199	0.00136471	mergeATAC_peak59594	5.57894	chr8:79	1.18836	.	4.39058	ATAC > CNV	De novo increase
chr1	151207081	151207399	0.00287285	3.13715e-05	mergeATAC_peak3665	7.35464	chr1:151	2.96475	.	4.38989	ATAC > CNV	De novo increase
chr5	3886698	3887130	0.0127565	0.000279184	mergeATAC_peak46381	5.45872	chr5:3	1.07241	.	4.38631	ATAC > CNV	De novo increase
chr8	101632590	101632826	2.31353e-07	3.65937e-10	mergeATAC_peak60057	9.57174	chr8:101	5.18747	GRHL2	4.38427	ATAC > CNV	De novo increase
chr1	228406973	228407437	0.000401273	2.44152e-06	mergeATAC_peak6255	6.24049	chr1:228	1.85919	ENSG00000231563;TRIM11	4.3813	ATAC > CNV	De novo increase
chr20	41017586	41018080	0.0470618	0.00222898	mergeATAC_peak36622	5.74244	chr20:41	1.36378	.	4.37865	ATAC > CNV	De novo increase
chr1	210373920	210374180	0.0344199	0.00134319	mergeATAC_peak5705	5.64861	chr1:210	1.27287	RNU5A-8P	4.37575	ATAC > CNV	De novo increase
chr8	142528392	142528737	0.0172708	0.000450096	mergeATAC_peak61413	7.57451	chr8:142	3.20182	.	4.37269	ATAC > CNV	De novo increase
chr20	57622551	57622777	0.0177293	0.000468804	mergeATAC_peak37160	5.92845	chr20:57	1.55855	.	4.3699	ATAC > CNV	De novo increase
chr9	129773661	129774063	0.0127636	0.000279532	mergeATAC_peak64240	5.80303	chr9:129	1.43556	.	4.36747	ATAC > CNV	De novo increase
chr14	77186880	77187079	0.0344199	0.00138655	mergeATAC_peak18591	5.55812	chr14:77	1.19532	.	4.3628	ATAC > CNV	De novo increase
chr4	52848293	52848873	0.0184177	0.000501961	mergeATAC_peak44278	5.53651	chr4:52	1.2072	.	4.32932	ATAC > CNV	De novo increase
chr8	118878391	118879025	0.00143778	1.21362e-05	mergeATAC_peak60536	6.43262	chr8:118	2.10518	.	4.32744	ATAC > CNV	De novo increase
chr17	50673274	50673511	0.0450557	0.00205592	mergeATAC_peak25987	6.6464	chr17:50	2.32619	ABCC3	4.32022	ATAC > CNV	De novo increase
chr11	33241134	33241619	0.00010607	4.72671e-07	mergeATAC_peak10265	5.41725	chr11:33	1.10467	.	4.31258	ATAC > CNV	De novo increase
chr6	41920891	41921222	0.0450557	0.00205592	mergeATAC_peak51459	5.82899	chr6:41	1.5177	BYSL;MED20;ENSG00000288721	4.31128	ATAC > CNV	De novo increase
chr16	23435512	23435865	0.0172708	0.000446379	mergeATAC_peak22239	5.73005	chr16:23	1.44244	.	4.2876	ATAC > CNV	De novo increase
chr6	28953204	28953415	0.0244133	0.00079755	mergeATAC_peak50757	5.93294	chr6:28	1.65318	.	4.27976	ATAC > CNV	De novo increase
chr21	41610455	41610665	0.0470618	0.0023114	mergeATAC_peak38087	5.99181	chr21:41	1.72584	.	4.26597	ATAC > CNV	De novo increase
chr2	14626931	14627339	0.0344199	0.00138119	mergeATAC_peak31384	5.37172	chr2:14	1.10738	.	4.26435	ATAC > CNV	De novo increase
chr10	113740934	113741181	0.034578	0.00141991	mergeATAC_peak9040	5.28161	chr10:113	1.03019	.	4.25142	ATAC > CNV	De novo increase
chr6	28944492	28944708	0.0119155	0.00023941	mergeATAC_peak50755	5.87599	chr6:28	1.65318	LINC01556	4.22282	ATAC > CNV	De novo increase
chr17	56162784	56163102	0.0470618	0.0023114	mergeATAC_peak26100	5.41832	chr17:56	1.20061	.	4.21771	ATAC > CNV	De novo increase
chr5	177357716	177358224	0.000381619	2.30847e-06	mergeATAC_peak49624	5.9124	chr5:177	1.69784	RGS14	4.21455	ATAC > CNV	De novo increase
chr8	134261714	134261909	0.0120998	0.000244997	mergeATAC_peak61127	10.7404	chr8:134	6.53886	.	4.20155	ATAC > CNV	De novo increase
chr2	208019979	208020495	0.00278304	3.02215e-05	mergeATAC_peak34897	5.40142	chr2:208	1.20552	RNU6-360P	4.1959	ATAC > CNV	De novo increase
chr8	136259245	136259703	8.14642e-05	3.44437e-07	mergeATAC_peak61200	10.0661	chr8:136	5.87389	.	4.19224	ATAC > CNV	De novo increase
chr1	151729583	151730277	7.84362e-07	1.49116e-09	mergeATAC_peak3710	7.15656	chr1:151	2.96475	.	4.19181	ATAC > CNV	De novo increase
chr16	1106337	1106572	0.0127565	0.000279184	mergeATAC_peak21413	5.54826	chr16:1	1.35645	ENSG00000260702	4.19181	ATAC > CNV	De novo increase
chr1	110684308	110684857	0.00937205	0.000174752	mergeATAC_peak2953	6.10497	chr1:110	1.92785	.	4.17712	ATAC > CNV	De novo increase
chr8	126430148	126430515	0.00570456	8.57189e-05	mergeATAC_peak60835	7.76606	chr8:126	3.59075	.	4.17531	ATAC > CNV	De novo increase
chr9	97809028	97809316	0.0178618	0.000476045	mergeATAC_peak63230	5.34138	chr9:97	1.17105	PTCSC2	4.17033	ATAC > CNV	De novo increase
chr16	535578	535802	0.00761095	0.000129876	mergeATAC_peak21351	5.58146	chr16:0	1.41599	MIR5587	4.16547	ATAC > CNV	De novo increase
chr17	44587407	44587677	0.045301	0.00209218	mergeATAC_peak25641	5.35157	chr17:44	1.18887	.	4.1627	ATAC > CNV	De novo increase
chr1	225611933	225612219	0.0470618	0.0023114	mergeATAC_peak6122	5.72568	chr1:225	1.57633	.	4.14935	ATAC > CNV	De novo increase
chr16	28623455	28623718	0.0470618	0.00236633	mergeATAC_peak22371	5.18796	chr16:28	1.04161	ENSG00000288656;ENSG00000289756;ENSG00000289755	4.14635	ATAC > CNV	De novo increase
chr7	116711997	116712216	0.0230909	0.000677828	mergeATAC_peak57240	5.92863	chr7:116	1.78889	.	4.13974	ATAC > CNV	De novo increase
chr8	139393983	139394296	0.000225476	1.20776e-06	mergeATAC_peak61273	7.81525	chr8:139	3.67788	.	4.13737	ATAC > CNV	De novo increase
chr8	134713000	134713610	1.02619e-15	6.24286e-20	mergeATAC_peak61138	10.6679	chr8:134	6.53886	ZFAT	4.12908	ATAC > CNV	De novo increase
chr19	36331659	36332014	0.00518048	7.35893e-05	mergeATAC_peak30021	5.78775	chr19:36	1.6655	LINC00665	4.12225	ATAC > CNV	De novo increase
chr21	42097868	42098154	0.0245077	0.00080399	mergeATAC_peak38122	5.76081	chr21:42	1.64538	.	4.11543	ATAC > CNV	De novo increase
chr8	136679547	136679807	0.0111787	0.000219825	mergeATAC_peak61206	9.98701	chr8:136	5.87389	.	4.11312	ATAC > CNV	De novo increase
chr8	140445224	140445632	2.15853e-05	7.15669e-08	mergeATAC_peak61307	7.67397	chr8:140	3.56306	.	4.11092	ATAC > CNV	De novo increase
chr5	150562974	150563146	0.0344199	0.00136471	mergeATAC_peak48923	6.27616	chr5:150	2.16571	.	4.11045	ATAC > CNV	De novo increase
chr7	152673929	152674294	0.00453505	6.00333e-05	mergeATAC_peak58079	5.43234	chr7:152	1.32398	.	4.10836	ATAC > CNV	De novo increase
chr7	101283047	101283278	0.0470618	0.00240361	mergeATAC_peak56899	5.23941	chr7:101	1.13788	.	4.10153	ATAC > CNV	De novo increase
chr6	63441230	63441883	0.00895122	0.000162957	mergeATAC_peak51986	6.03969	chr6:63	1.94064	ENSG00000218048	4.09905	ATAC > CNV	De novo increase
chr8	133569683	133569909	1.49952e-06	3.07882e-09	mergeATAC_peak61096	10.2932	chr8:133	6.19438	ST3GAL1	4.09882	ATAC > CNV	De novo increase
chr6	12324238	12324594	0.0470618	0.00232958	mergeATAC_peak50209	5.12464	chr6:12	1.03078	.	4.09387	ATAC > CNV	De novo increase
chr8	143609195	143609404	0.0470618	0.00227543	mergeATAC_peak61494	7.32974	chr8:143	3.23947	PYCR3	4.09027	ATAC > CNV	De novo increase
chr21	38228148	38228444	0.0030142	3.34193e-05	mergeATAC_peak37943	5.98998	chr21:38	1.91717	.	4.0728	ATAC > CNV	De novo increase
chr8	102576895	102577216	0.00570456	8.57189e-05	mergeATAC_peak60102	8.75261	chr8:102	4.68451	.	4.0681	ATAC > CNV	De novo increase
chr16	24010546	24010761	0.00931513	0.000173403	mergeATAC_peak22263	5.29435	chr16:24	1.22966	.	4.06469	ATAC > CNV	De novo increase
chr6	32475099	32475248	0.0452143	0.00207398	mergeATAC_peak51005	5.75225	chr6:32	1.68896	.	4.06329	ATAC > CNV	De novo increase
chr7	76600581	76600950	0.0344199	0.00137559	mergeATAC_peak56241	5.65462	chr7:76	1.59521	.	4.05941	ATAC > CNV	De novo increase
chr1	173412013	173412321	0.0178137	0.000472632	mergeATAC_peak4639	5.41876	chr1:173	1.36715	.	4.05162	ATAC > CNV	De novo increase
chr2	84474218	84474521	0.0246256	0.000810478	mergeATAC_peak32761	5.15281	chr2:84	1.10959	.	4.04321	ATAC > CNV	De novo increase
chr1	108533491	108533766	0.0113385	0.000226858	mergeATAC_peak2810	5.61427	chr1:108	1.60047	.	4.01379	ATAC > CNV	De novo increase
chr1	173056374	173056638	0.0323214	0.00119126	mergeATAC_peak4621	5.37938	chr1:173	1.36715	.	4.01223	ATAC > CNV	De novo increase
chr9	128250404	128250791	0.0120998	0.0002496	mergeATAC_peak64140	5.29793	chr9:128	1.2925	DNM1	4.00544	ATAC > CNV	De novo increase
chr8	134223469	134223848	0.0111857	0.000220818	mergeATAC_peak61125	10.5398	chr8:134	6.53886	.	4.00092	ATAC > CNV	De novo increase
chr10	56881374	56881580	0.0466783	0.00216953	mergeATAC_peak7783	5.09629	chr10:56	1.09662	.	3.99967	ATAC > CNV	De novo increase
chr16	29783463	29783894	0.0246256	0.000810478	mergeATAC_peak22422	5.1992	chr16:29	1.20858	.	3.99062	ATAC > CNV	De novo increase
chr8	132875534	132875738	0.00086635	6.31141e-06	mergeATAC_peak61044	8.19133	chr8:132	4.20475	.	3.98658	ATAC > CNV	De novo increase
chr5	154835540	154835782	0.00290579	3.18559e-05	mergeATAC_peak49066	6.61087	chr5:154	2.6285	FAXDC2	3.98237	ATAC > CNV	De novo increase
chr9	91734448	91734656	0.0470618	0.0022473	mergeATAC_peak62990	5.26154	chr9:91	1.28203	.	3.97952	ATAC > CNV	De novo increase
chr6	169529850	169530273	0.024849	0.000821611	mergeATAC_peak54347	5.13655	chr6:169	1.165	.	3.97155	ATAC > CNV	De novo increase
chr17	1628830	1629079	0.0470618	0.00240361	mergeATAC_peak23958	5.43284	chr17:1	1.4726	SLC43A2	3.96023	ATAC > CNV	De novo increase
chr12	110570115	110570478	0.0246077	0.000807816	mergeATAC_peak15003	4.97439	chr12:110	1.01499	.	3.9594	ATAC > CNV	De novo increase
chr9	92138180	92138399	0.0342313	0.00128177	mergeATAC_peak63000	5.02268	chr9:92	1.06451	.	3.95816	ATAC > CNV	De novo increase
chr8	134726047	134726613	1.09559e-14	8.33135e-19	mergeATAC_peak61140	10.4829	chr8:134	6.53886	.	3.944	ATAC > CNV	De novo increase
chr15	89243662	89244062	0.0184177	0.000501961	mergeATAC_peak20951	5.1941	chr15:89	1.25418	FANCI	3.93992	ATAC > CNV	De novo increase
chr9	133449883	133450233	0.018081	0.000487012	mergeATAC_peak64401	5.41799	chr9:133	1.47955	.	3.93845	ATAC > CNV	De novo increase
chr1	242579435	242580005	0.00313996	3.54504e-05	mergeATAC_peak6647	5.26668	chr1:242	1.32906	.	3.93763	ATAC > CNV	De novo increase
chr2	95646293	95646555	0.0470618	0.00234786	mergeATAC_peak32987	5.16104	chr2:95	1.22858	.	3.93246	ATAC > CNV	De novo increase
chr21	35989190	35989687	0.00330919	3.82502e-05	mergeATAC_peak37844	4.93274	chr21:35	1.01692	.	3.91582	ATAC > CNV	De novo increase
chr17	64326777	64327087	0.00609556	9.40046e-05	mergeATAC_peak26422	5.64706	chr17:64	1.73317	.	3.91389	ATAC > CNV	De novo increase
chr13	112990938	112991214	0.0450557	0.00205592	mergeATAC_peak17206	6.01413	chr13:112	2.1046	.	3.90954	ATAC > CNV	De novo increase
chr5	168164003	168164292	0.0344199	0.00133134	mergeATAC_peak49328	6.87343	chr5:168	2.96942	.	3.90401	ATAC > CNV	De novo increase
chr6	21193031	21193414	0.0470618	0.00236633	mergeATAC_peak50476	4.93914	chr6:21	1.04238	.	3.89677	ATAC > CNV	De novo increase
chr8	101504639	101504865	3.29285e-05	1.1819e-07	mergeATAC_peak60042	9.08242	chr8:101	5.18747	.	3.89496	ATAC > CNV	De novo increase
chr8	131906545	131906853	6.53592e-07	1.21273e-09	mergeATAC_peak61018	9.61234	chr8:131	5.72107	.	3.89127	ATAC > CNV	De novo increase
chr1	234907740	234908357	0.000576117	3.80275e-06	mergeATAC_peak6482	5.96648	chr1:234	2.07983	.	3.88665	ATAC > CNV	De novo increase
chr5	179732463	179732928	0.0244133	0.00079755	mergeATAC_peak49732	6.67995	chr5:179	2.79799	MAML1	3.88197	ATAC > CNV	De novo increase
chr21	33184653	33185045	0.0344199	0.00139759	mergeATAC_peak37757	5.37627	chr21:33	1.50131	.	3.87495	ATAC > CNV	De novo increase
chr21	45820643	45820840	0.0323214	0.00119126	mergeATAC_peak38325	5.05646	chr21:45	1.18677	.	3.86968	ATAC > CNV	De novo increase
chr1	234963287	234963601	0.00602554	9.26351e-05	mergeATAC_peak6491	5.9486	chr1:234	2.07983	LNCATV	3.86878	ATAC > CNV	De novo increase
chr1	147516592	147516907	0.016317	0.00039582	mergeATAC_peak3460	5.25782	chr1:147	1.4011	LINC00624	3.85672	ATAC > CNV	De novo increase
chr21	31366856	31367114	0.0324783	0.0012018	mergeATAC_peak37679	5.61507	chr21:31	1.76107	.	3.854	ATAC > CNV	De novo increase
chr21	28256337	28256669	0.0250292	0.000830235	mergeATAC_peak37616	5.76044	chr21:28	1.91455	.	3.8459	ATAC > CNV	De novo increase
chr17	27829901	27830276	0.018274	0.000494434	mergeATAC_peak24860	6.0588	chr17:27	2.21473	.	3.84407	ATAC > CNV	De novo increase
chr5	38441795	38442070	0.0173537	0.000456071	mergeATAC_peak46896	5.42489	chr5:38	1.58312	.	3.84177	ATAC > CNV	De novo increase
chr20	57597049	57597262	0.0089587	0.000163639	mergeATAC_peak37159	5.39914	chr20:57	1.55855	.	3.84059	ATAC > CNV	De novo increase
chr7	45116079	45116377	0.00864596	0.000155691	mergeATAC_peak55619	5.10771	chr7:45	1.26796	.	3.83975	ATAC > CNV	De novo increase
chr20	47434259	47434550	0.0250005	0.00082776	mergeATAC_peak36828	5.09281	chr20:47	1.26518	.	3.82762	ATAC > CNV	De novo increase
chr1	150668726	150669015	0.00864596	0.000155691	mergeATAC_peak3622	6.49205	chr1:150	2.6685	.	3.82355	ATAC > CNV	De novo increase
chr1	205575364	205575870	0.00309372	3.45833e-05	mergeATAC_peak5466	5.55407	chr1:205	1.74122	.	3.81285	ATAC > CNV	De novo increase
chr17	42964238	42964568	0.0178137	0.000472632	mergeATAC_peak25524	5.65934	chr17:42	1.85005	AARSD1	3.80929	ATAC > CNV	De novo increase
chr17	49815734	49816268	0.0250924	0.000833951	mergeATAC_peak25894	5.32982	chr17:49	1.5292	KAT7	3.80062	ATAC > CNV	De novo increase
chr1	161616049	161616247	0.00591554	9.01487e-05	mergeATAC_peak4286	6.5297	chr1:161	2.73056	.	3.79914	ATAC > CNV	De novo increase
chr17	2955065	2955488	0.000134325	6.39438e-07	mergeATAC_peak24049	5.2809	chr17:2	1.49131	.	3.78958	ATAC > CNV	De novo increase
chr8	127725804	127725992	0.0112845	0.000224828	mergeATAC_peak60884	7.58616	chr8:127	3.79706	.	3.7891	ATAC > CNV	De novo increase
chr1	155061564	155061801	0.00642384	0.000101021	mergeATAC_peak3917	6.11874	chr1:155	2.33204	ADAM15	3.7867	ATAC > CNV	De novo increase
chr1	237562311	237562553	0.0470618	0.00238491	mergeATAC_peak6571	5.35273	chr1:237	1.56734	.	3.78539	ATAC > CNV	De novo increase
chr16	9134872	9135088	0.0178137	0.000472661	mergeATAC_peak21802	4.91274	chr16:9	1.14081	.	3.77193	ATAC > CNV	De novo increase
chr8	111792259	111792505	0.000326635	1.91259e-06	mergeATAC_peak60370	8.28357	chr8:111	4.51602	.	3.76755	ATAC > CNV	De novo increase
chr20	57346467	57346748	0.0323214	0.00119126	mergeATAC_peak37146	5.32363	chr20:57	1.55855	.	3.76508	ATAC > CNV	De novo increase
chr6	46097349	46097705	0.0178618	0.000476488	mergeATAC_peak51662	5.3251	chr6:46	1.56059	.	3.76451	ATAC > CNV	De novo increase
chr1	171781185	171781768	0.00307542	3.43319e-05	mergeATAC_peak4576	5.10648	chr1:171	1.35307	METTL13	3.7534	ATAC > CNV	De novo increase
chr9	74952906	74953136	0.0324783	0.0012018	mergeATAC_peak62573	5.28109	chr9:74	1.53773	C9orf40;CARNMT1-AS1	3.74336	ATAC > CNV	De novo increase
chr5	178758855	178759181	0.0450557	0.00205592	mergeATAC_peak49709	6.89296	chr5:178	3.15196	.	3.741	ATAC > CNV	De novo increase
chr8	100492127	100492490	7.73206e-09	6.93817e-12	mergeATAC_peak59969	11.4019	chr8:100	7.66417	ENSG00000254364	3.7377	ATAC > CNV	De novo increase
chr17	72602905	72603265	0.034578	0.00141991	mergeATAC_peak26660	4.75556	chr17:72	1.02166	LINC00511	3.7339	ATAC > CNV	De novo increase
chr1	180586846	180587157	0.0344199	0.00138655	mergeATAC_peak4811	5.13903	chr1:180	1.40823	.	3.7308	ATAC > CNV	De novo increase
chr6	73675544	73675784	0.0470618	0.00236633	mergeATAC_peak52156	5.18332	chr6:73	1.45409	.	3.72923	ATAC > CNV	De novo increase
chr12	55456	55608	0.00135059	1.1277e-05	mergeATAC_peak12643	4.76672	chr12:0	1.05655	.	3.71018	ATAC > CNV	De novo increase
chr7	5878597	5879009	0.0178618	0.000476488	mergeATAC_peak54632	4.93817	chr7:5	1.22893	OCM	3.70924	ATAC > CNV	De novo increase
chr8	123316212	123316499	0.018274	0.000494434	mergeATAC_peak60672	5.58274	chr8:123	1.87538	.	3.70736	ATAC > CNV	De novo increase
chr1	228004339	228004537	0.0344199	0.00139759	mergeATAC_peak6234	5.53113	chr1:228	1.85919	.	3.67194	ATAC > CNV	De novo increase
chr6	32685680	32686001	0.0470618	0.00239805	mergeATAC_peak51036	5.35059	chr6:32	1.68896	.	3.66163	ATAC > CNV	De novo increase
chr6	158632335	158632603	0.0244133	0.00079755	mergeATAC_peak54041	5.70782	chr6:158	2.04724	.	3.66058	ATAC > CNV	De novo increase
chr6	44447007	44447299	0.00923304	0.000170335	mergeATAC_peak51620	5.47247	chr6:44	1.81935	.	3.65311	ATAC > CNV	De novo increase
chr9	92140352	92140592	0.00931513	0.000173403	mergeATAC_peak63001	4.70201	chr9:92	1.06451	ENSG00000290644;LINC00475	3.63749	ATAC > CNV	De novo increase
chr19	34261771	34262111	0.0470618	0.00236633	mergeATAC_peak29918	4.91917	chr19:34	1.28252	.	3.63664	ATAC > CNV	De novo increase
chr8	143906052	143906366	0.008272	0.00014346	mergeATAC_peak61523	6.87552	chr8:143	3.23947	.	3.63605	ATAC > CNV	De novo increase
chr8	143578614	143578818	0.0450557	0.00205592	mergeATAC_peak61490	6.86996	chr8:143	3.23947	NAPRT;ENSG00000254741;ENSG00000279605	3.63049	ATAC > CNV	De novo increase
chr8	42499137	42499525	0.0129729	0.000288853	mergeATAC_peak59092	4.66069	chr8:42	1.04027	.	3.62042	ATAC > CNV	De novo increase
chr1	180580204	180580659	0.00325967	3.73803e-05	mergeATAC_peak4809	5.02858	chr1:180	1.40823	.	3.62035	ATAC > CNV	De novo increase
chr9	94916994	94917228	0.00668872	0.000106713	mergeATAC_peak63109	4.9928	chr9:94	1.37538	.	3.61743	ATAC > CNV	De novo increase
chr16	4179142	4179381	0.0120998	0.000254847	mergeATAC_peak21656	5.35851	chr16:4	1.74725	.	3.61126	ATAC > CNV	De novo increase
chr1	145459546	145459944	0.00937656	0.000175407	mergeATAC_peak3380	4.89853	chr1:145	1.30704	ENSG00000286620	3.59148	ATAC > CNV	De novo increase
chr8	136489130	136489727	4.74788e-11	2.1663e-14	mergeATAC_peak61204	9.46249	chr8:136	5.87389	LINC02055	3.5886	ATAC > CNV	De novo increase
chr16	10929106	10929359	0.0470618	0.00232994	mergeATAC_peak21851	5.20493	chr16:10	1.62214	CIITA	3.58278	ATAC > CNV	De novo increase
chr1	235460596	235461061	0.0244133	0.000785459	mergeATAC_peak6528	4.95428	chr1:235	1.37278	.	3.5815	ATAC > CNV	De novo increase
chr8	127088615	127089107	2.33282e-05	7.87647e-08	mergeATAC_peak60871	7.37832	chr8:127	3.79706	.	3.58126	ATAC > CNV	De novo increase
chr19	34268938	34269289	0.034578	0.00141991	mergeATAC_peak29919	4.85782	chr19:34	1.28252	.	3.5753	ATAC > CNV	De novo increase
chr8	125576158	125576685	0.000306173	1.76949e-06	mergeATAC_peak60800	6.06337	chr8:125	2.49263	.	3.57073	ATAC > CNV	De novo increase
chr1	151740033	151740273	0.0323214	0.00119126	mergeATAC_peak3714	6.53475	chr1:151	2.96475	.	3.57001	ATAC > CNV	De novo increase
chr4	54559273	54559684	0.0126346	0.000274979	mergeATAC_peak44309	4.57922	chr4:54	1.01994	.	3.55928	ATAC > CNV	De novo increase
chr16	47920763	47921138	0.00701685	0.00011491	mergeATAC_peak22650	4.55761	chr16:47	1.01081	.	3.5468	ATAC > CNV	De novo increase
chr5	178130143	178130434	0.00135919	1.13695e-05	mergeATAC_peak49678	6.69125	chr5:178	3.15196	RMND5B	3.53928	ATAC > CNV	De novo increase
chr21	39518376	39518629	0.0113385	0.000226858	mergeATAC_peak38019	4.9625	chr21:39	1.43214	.	3.53036	ATAC > CNV	De novo increase
chr8	134740050	134740769	4.3742e-11	1.92928e-14	mergeATAC_peak61142	10.0691	chr8:134	6.53886	.	3.53028	ATAC > CNV	De novo increase
chr1	246817939	246818090	0.0470618	0.0023114	mergeATAC_peak6763	5.21842	chr1:246	1.69078	ENSG00000235386	3.52764	ATAC > CNV	De novo increase
chr3	90561251	90561772	0.0470618	0.00240361	mergeATAC_peak41288	4.59966	chr3:90	1.08287	.	3.51679	ATAC > CNV	De novo increase
chr3	99176498	99176861	0.0470618	0.00245032	mergeATAC_peak41361	4.66668	chr3:99	1.14999	.	3.51669	ATAC > CNV	De novo increase
chr8	144125525	144125699	0.0009121	6.68632e-06	mergeATAC_peak61551	6.39485	chr8:144	2.8808	.	3.51405	ATAC > CNV	De novo increase
chr8	119509735	119509946	0.0470618	0.0023114	mergeATAC_peak60559	6.02079	chr8:119	2.50998	.	3.51081	ATAC > CNV	De novo increase
chr8	114047046	114047237	0.00748051	0.000126399	mergeATAC_peak60406	10.5724	chr8:114	7.06545	.	3.50699	ATAC > CNV	De novo increase
chr6	35146473	35146731	0.0252367	0.000840186	mergeATAC_peak51178	4.80377	chr6:35	1.29749	.	3.50628	ATAC > CNV	De novo increase
chr9	132901873	132902162	0.0176487	0.000465168	mergeATAC_peak64354	4.55442	chr9:132	1.06766	TSC1	3.48676	ATAC > CNV	De novo increase
chr21	26790306	26790588	0.0470618	0.00236632	mergeATAC_peak37577	5.45311	chr21:26	1.96706	.	3.48604	ATAC > CNV	De novo increase
chr8	101035943	101036377	0.00076453	5.43011e-06	mergeATAC_peak60008	8.66965	chr8:101	5.18747	.	3.48218	ATAC > CNV	De novo increase
chr13	110981908	110982477	0.0470618	0.00234679	mergeATAC_peak17143	5.0729	chr13:110	1.59281	.	3.48009	ATAC > CNV	De novo increase
chr16	47037830	47038190	0.0135017	0.000305869	mergeATAC_peak22636	4.48121	chr16:47	1.01081	.	3.47039	ATAC > CNV	De novo increase
chr21	32371923	32372189	0.0183611	0.000498184	mergeATAC_peak37712	5.01511	chr21:32	1.57276	.	3.44235	ATAC > CNV	De novo increase
chr21	36114255	36114533	0.0470618	0.00236377	mergeATAC_peak37853	4.89522	chr21:36	1.46781	.	3.42741	ATAC > CNV	De novo increase
chr8	102272454	102272767	0.000345909	2.04123e-06	mergeATAC_peak60092	8.10856	chr8:102	4.68451	UBR5	3.42405	ATAC > CNV	De novo increase
chr6	30544719	30544935	0.00896126	0.000164189	mergeATAC_peak50827	5.43388	chr6:30	2.02326	.	3.41062	ATAC > CNV	De novo increase
chr16	4188582	4188799	0.0244133	0.00079755	mergeATAC_peak21659	5.14761	chr16:4	1.74725	.	3.40037	ATAC > CNV	De novo increase
chr8	134905544	134905759	0.000125739	5.89002e-07	mergeATAC_peak61164	9.93602	chr8:134	6.53886	.	3.39717	ATAC > CNV	De novo increase
chr1	8897513	8897963	0.018594	0.000509595	mergeATAC_peak333	4.8108	chr1:8	1.41484	.	3.39595	ATAC > CNV	De novo increase
chr8	141726968	141727198	0.000211032	1.11693e-06	mergeATAC_peak61393	7.46704	chr8:141	4.07364	.	3.3934	ATAC > CNV	De novo increase
chr9	107554752	107554982	0.045301	0.00209218	mergeATAC_peak63434	4.74967	chr9:107	1.36199	.	3.38768	ATAC > CNV	De novo increase
chr1	114510791	114511360	0.00434884	5.66829e-05	mergeATAC_peak3088	4.75757	chr1:114	1.37629	TRIM33	3.38127	ATAC > CNV	De novo increase
chr8	127923765	127923985	0.0244133	0.000751058	mergeATAC_peak60908	7.17626	chr8:127	3.79706	.	3.3792	ATAC > CNV	De novo increase
chr4	6269478	6269749	0.0344199	0.00135446	mergeATAC_peak43552	4.42451	chr4:6	1.05308	WFS1	3.37142	ATAC > CNV	De novo increase
chr8	101467128	101467658	2.04126e-05	6.67474e-08	mergeATAC_peak60036	8.53712	chr8:101	5.18747	.	3.34965	ATAC > CNV	De novo increase
chr8	141508040	141508274	0.0019196	1.80717e-05	mergeATAC_peak61388	7.41268	chr8:141	4.07364	MROH5;ENSG00000287325	3.33903	ATAC > CNV	De novo increase
chr7	148987108	148987327	0.0029035	3.17503e-05	mergeATAC_peak57907	4.64869	chr7:148	1.32504	RNY1;GHET1	3.32365	ATAC > CNV	De novo increase
chr1	235295939	235296330	0.02526	0.000843653	mergeATAC_peak6517	4.68723	chr1:235	1.37278	RPL23AP23	3.31445	ATAC > CNV	De novo increase
chr10	80171358	80171652	0.0452143	0.00207398	mergeATAC_peak8272	4.69372	chr10:80	1.3916	.	3.30212	ATAC > CNV	De novo increase
chr21	41751576	41751971	0.00219371	2.11861e-05	mergeATAC_peak38096	5.0227	chr21:41	1.72584	.	3.29686	ATAC > CNV	De novo increase
chr5	154520997	154521270	0.00443807	5.82509e-05	mergeATAC_peak49045	5.91227	chr5:154	2.6285	.	3.28377	ATAC > CNV	De novo increase
chr17	79719267	79719572	0.0256794	0.000862345	mergeATAC_peak27073	4.59565	chr17:79	1.31328	.	3.28237	ATAC > CNV	De novo increase
chr1	211602079	211602606	0.016317	0.00039582	mergeATAC_peak5739	4.64413	chr1:211	1.36445	.	3.27968	ATAC > CNV	De novo increase
chr20	63948511	63948811	0.00976654	0.000184633	mergeATAC_peak37334	4.83809	chr20:63	1.56202	.	3.27607	ATAC > CNV	De novo increase
chr1	226634159	226634401	0.0110862	0.000217506	mergeATAC_peak6191	4.92815	chr1:226	1.65341	.	3.27474	ATAC > CNV	De novo increase
chr6	157873788	157874031	0.0126346	0.000274979	mergeATAC_peak54001	4.74473	chr6:157	1.47244	.	3.27229	ATAC > CNV	De novo increase
chr6	43856205	43856465	0.0351957	0.00146455	mergeATAC_peak51570	5.08842	chr6:43	1.8207	.	3.26772	ATAC > CNV	De novo increase
chr1	177423110	177423354	0.0470618	0.00236377	mergeATAC_peak4720	4.99919	chr1:177	1.73755	.	3.26165	ATAC > CNV	De novo increase
chr20	56550678	56550902	0.00966331	0.000181947	mergeATAC_peak37125	4.48033	chr20:56	1.22326	ENSG00000287079	3.25707	ATAC > CNV	De novo increase
chr9	89999219	89999417	0.00602406	9.24439e-05	mergeATAC_peak62922	4.83113	chr9:89	1.57869	.	3.25243	ATAC > CNV	De novo increase
chr5	178120954	178121248	7.98347e-06	2.23412e-08	mergeATAC_peak49676	6.4019	chr5:178	3.15196	.	3.24994	ATAC > CNV	De novo increase
chr6	134353239	134353506	0.0187723	0.000517337	mergeATAC_peak53325	4.80459	chr6:134	1.55713	.	3.24746	ATAC > CNV	De novo increase
chr15	90868425	90868617	0.0324783	0.0012018	mergeATAC_peak21050	4.51578	chr15:90	1.27171	FURIN	3.24407	ATAC > CNV	De novo increase
chr8	108673198	108673462	0.0245077	0.000802172	mergeATAC_peak60293	5.14198	chr8:108	1.89863	.	3.24335	ATAC > CNV	De novo increase
chr17	38735161	38735387	0.00665474	0.000105968	mergeATAC_peak25200	4.3741	chr17:38	1.1319	PCGF2	3.2422	ATAC > CNV	De novo increase
chr17	8412980	8413176	0.0470618	0.00238085	mergeATAC_peak24382	4.86449	chr17:8	1.63259	NDEL1	3.2319	ATAC > CNV	De novo increase
chr8	113993397	113993649	0.00508233	7.09583e-05	mergeATAC_peak60404	10.9606	chr8:113	7.72913	.	3.23144	ATAC > CNV	De novo increase
chr6	47168204	47168661	0.0256073	0.000859146	mergeATAC_peak51713	5.11453	chr6:47	1.89002	.	3.22452	ATAC > CNV	De novo increase
chr8	111045677	111046008	0.00401265	5.07753e-05	mergeATAC_peak60359	7.73761	chr8:111	4.51602	.	3.22159	ATAC > CNV	De novo increase
chr7	36290243	36290498	0.0452143	0.00207398	mergeATAC_peak55395	4.93068	chr7:36	1.71592	.	3.21476	ATAC > CNV	De novo increase
chr5	38866949	38867386	0.000182222	9.50589e-07	mergeATAC_peak46918	4.79672	chr5:38	1.58312	.	3.2136	ATAC > CNV	De novo increase
chr8	122687042	122687413	0.000939719	6.94596e-06	mergeATAC_peak60643	4.87962	chr8:122	1.66942	.	3.2102	ATAC > CNV	De novo increase
chr7	66086923	66087398	0.0113385	0.000226858	mergeATAC_peak55909	4.55012	chr7:66	1.33995	ASL;ENSG00000249319	3.21017	ATAC > CNV	De novo increase
chr1	206992884	206993169	0.0345979	0.00142231	mergeATAC_peak5563	4.87211	chr1:206	1.66368	.	3.20843	ATAC > CNV	De novo increase
chr8	143547064	143547517	0.000849893	6.13982e-06	mergeATAC_peak61482	6.44781	chr8:143	3.23947	.	3.20834	ATAC > CNV	De novo increase
chr8	111797288	111797523	0.000228277	1.2325e-06	mergeATAC_peak60371	7.71937	chr8:111	4.51602	.	3.20335	ATAC > CNV	De novo increase
chr9	91078181	91078423	0.0344199	0.00139759	mergeATAC_peak62963	4.48537	chr9:91	1.28203	.	3.20334	ATAC > CNV	De novo increase
chr8	101301430	101301711	0.000144299	7.04476e-07	mergeATAC_peak60019	8.38946	chr8:101	5.18747	.	3.20199	ATAC > CNV	De novo increase
chr9	107480447	107480696	0.0324783	0.0012018	mergeATAC_peak63431	4.55225	chr9:107	1.36199	.	3.19026	ATAC > CNV	De novo increase
chr6	34154799	34155041	0.044831	0.00201361	mergeATAC_peak51139	4.31591	chr6:34	1.12762	GRM4	3.18828	ATAC > CNV	De novo increase
chr20	57089699	57089924	0.0347007	0.00143276	mergeATAC_peak37138	4.74608	chr20:57	1.55855	.	3.18753	ATAC > CNV	De novo increase
chr1	154272225	154272665	0.0468057	0.00217688	mergeATAC_peak3853	4.88022	chr1:154	1.70458	HAX1	3.17564	ATAC > CNV	De novo increase
chr9	114742994	114743264	0.00319782	3.6261e-05	mergeATAC_peak63683	4.79241	chr9:114	1.61734	.	3.17507	ATAC > CNV	De novo increase
chr2	20109648	20109960	0.0452143	0.00207398	mergeATAC_peak31478	4.7902	chr2:20	1.61876	.	3.17143	ATAC > CNV	De novo increase
chr9	111925090	111925331	0.0344199	0.00133594	mergeATAC_peak63546	4.57788	chr9:111	1.40682	.	3.17106	ATAC > CNV	De novo increase
chr3	19885492	19885701	0.0470618	0.00240361	mergeATAC_peak40008	4.31392	chr3:19	1.1559	.	3.15801	ATAC > CNV	De novo increase
chr17	73333489	73333817	0.0470618	0.00246798	mergeATAC_peak26684	4.15208	chr17:73	1.00336	.	3.14872	ATAC > CNV	De novo increase
chr15	70800023	70800517	0.0244133	0.000763296	mergeATAC_peak20418	4.28913	chr15:70	1.1417	.	3.14743	ATAC > CNV	De novo increase
chr15	45430314	45430758	0.0179761	0.000481177	mergeATAC_peak19794	4.43055	chr15:45	1.29502	C15orf48	3.13554	ATAC > CNV	De novo increase
chr9	69815432	69815911	0.0095301	0.000178859	mergeATAC_peak62441	4.69978	chr9:69	1.56843	.	3.13135	ATAC > CNV	De novo increase
chr16	1025168	1025322	0.00337995	3.94278e-05	mergeATAC_peak21406	4.48735	chr16:1	1.35645	.	3.1309	ATAC > CNV	De novo increase
chr1	200891000	200891450	0.0438713	0.00191276	mergeATAC_peak5187	4.69935	chr1:200	1.57777	INAVA	3.12158	ATAC > CNV	De novo increase
chr20	57389043	57389481	0.0130508	0.00029158	mergeATAC_peak37148	4.67598	chr20:57	1.55855	.	3.11743	ATAC > CNV	De novo increase
chr6	36302518	36302814	0.0344199	0.00132676	mergeATAC_peak51235	4.64656	chr6:36	1.5405	.	3.10606	ATAC > CNV	De novo increase
chr17	80833114	80833555	0.0445625	0.00197523	mergeATAC_peak27132	4.14808	chr17:80	1.04941	.	3.09867	ATAC > CNV	De novo increase
chr17	47297744	47298316	0.0470618	0.00239804	mergeATAC_peak25766	4.27078	chr17:47	1.17216	.	3.09861	ATAC > CNV	De novo increase
chr12	758381	758573	0.0470618	0.00240361	mergeATAC_peak12668	4.15244	chr12:0	1.05655	.	3.0959	ATAC > CNV	De novo increase
chr8	133449530	133449959	7.98759e-12	2.55113e-15	mergeATAC_peak61083	9.28434	chr8:133	6.19438	.	3.08995	ATAC > CNV	De novo increase
chr1	114716679	114716954	0.0139886	0.00032019	mergeATAC_peak3094	4.45487	chr1:114	1.37629	NRAS	3.07857	ATAC > CNV	De novo increase
chr1	150764663	150765086	0.0128498	0.000284157	mergeATAC_peak3627	5.7421	chr1:150	2.6685	CTSS	3.07361	ATAC > CNV	De novo increase
chr17	5435926	5436244	0.00761095	0.000129876	mergeATAC_peak24170	4.38856	chr17:5	1.31842	.	3.07013	ATAC > CNV	De novo increase
chr1	107877198	107877497	0.00469353	6.29967e-05	mergeATAC_peak2795	4.8542	chr1:107	1.78456	.	3.06964	ATAC > CNV	De novo increase
chr6	166709773	166709966	0.0344199	0.00140871	mergeATAC_peak54238	4.72252	chr6:166	1.66068	.	3.06184	ATAC > CNV	De novo increase
chr8	101078118	101078325	0.0321458	0.00117043	mergeATAC_peak60010	8.24884	chr8:101	5.18747	.	3.06137	ATAC > CNV	De novo increase
chr8	142739438	142739707	0.000351454	2.07929e-06	mergeATAC_peak61427	6.25068	chr8:142	3.20182	.	3.04885	ATAC > CNV	De novo increase
chr20	63272671	63272989	0.0347007	0.0014312	mergeATAC_peak37288	4.60114	chr20:63	1.56202	ARFGAP1;NKAIN4	3.03912	ATAC > CNV	De novo increase
chr17	56172477	56173045	0.00231823	2.31415e-05	mergeATAC_peak26102	4.23802	chr17:56	1.20061	.	3.03741	ATAC > CNV	De novo increase
chr4	99403653	99403877	0.0344199	0.00140871	mergeATAC_peak44955	4.10699	chr4:99	1.07615	.	3.03085	ATAC > CNV	De novo increase
chr17	49703830	49704176	0.00649994	0.000103009	mergeATAC_peak25885	4.55924	chr17:49	1.5292	SLC35B1	3.03004	ATAC > CNV	De novo increase
chr8	101376128	101376772	1.03654e-10	5.51761e-14	mergeATAC_peak60024	8.21216	chr8:101	5.18747	.	3.02469	ATAC > CNV	De novo increase
chr5	169632985	169633256	0.0128065	0.000281836	mergeATAC_peak49380	5.58123	chr5:169	2.56038	.	3.02085	ATAC > CNV	De novo increase
chr6	139161136	139161556	0.0476032	0.00253976	mergeATAC_peak53511	4.22073	chr6:139	1.20512	.	3.01561	ATAC > CNV	De novo increase
chr8	141346963	141347233	1.20494e-06	2.36402e-09	mergeATAC_peak61380	7.08631	chr8:141	4.07364	.	3.01266	ATAC > CNV	De novo increase
chr9	113406986	113407197	0.0127914	0.000280726	mergeATAC_peak63615	4.72088	chr9:113	1.70907	.	3.01181	ATAC > CNV	De novo increase
chr11	34859479	34859833	0.0160344	0.000383845	mergeATAC_peak10334	4.46916	chr11:34	1.46512	.	3.00404	ATAC > CNV	De novo increase
chr8	123661966	123662331	0.0452143	0.00207398	mergeATAC_peak60688	4.87684	chr8:123	1.87538	.	3.00146	ATAC > CNV	De novo increase
chr8	144003237	144003649	0.000345909	2.03946e-06	mergeATAC_peak61541	5.87666	chr8:144	2.8808	.	2.99587	ATAC > CNV	De novo increase
chr5	172932431	172932685	5.88789e-05	2.27172e-07	mergeATAC_peak49498	5.22875	chr5:172	2.23566	ERGIC1	2.99309	ATAC > CNV	De novo increase
chr4	37453818	37454047	0.0470618	0.00242246	mergeATAC_peak44017	4.27837	chr4:37	1.28767	C4orf19	2.9907	ATAC > CNV	De novo increase
chr8	114454539	114454764	7.60221e-06	2.08118e-08	mergeATAC_peak60415	10.0549	chr8:114	7.06545	.	2.98943	ATAC > CNV	De novo increase
chr1	8169825	8170051	0.0261307	0.000885051	mergeATAC_peak293	4.40327	chr1:8	1.41484	.	2.98843	ATAC > CNV	De novo increase
chr16	23463049	23463297	0.0470618	0.00244143	mergeATAC_peak22242	4.41324	chr16:23	1.44244	.	2.9708	ATAC > CNV	De novo increase
chr17	81959674	81959960	0.0470618	0.00236633	mergeATAC_peak27234	5.07886	chr17:81	2.11727	NOTUM	2.9616	ATAC > CNV	De novo increase
chr1	161117868	161118507	0.00145011	1.22844e-05	mergeATAC_peak4231	5.69162	chr1:161	2.73056	NIT1;PFDN2	2.96107	ATAC > CNV	De novo increase
chr3	161415504	161415803	0.0257045	0.000865558	mergeATAC_peak42571	4.12582	chr3:161	1.16507	.	2.96076	ATAC > CNV	De novo increase
chr17	28357383	28357784	0.00668872	0.000106713	mergeATAC_peak24881	4.72577	chr17:28	1.77546	ENSG00000258924;TMEM199;POLDIP2	2.95031	ATAC > CNV	De novo increase
chr1	170532344	170532645	0.00348692	4.1259e-05	mergeATAC_peak4541	4.25118	chr1:170	1.30154	GORAB;GORAB-AS1	2.94963	ATAC > CNV	De novo increase
chr15	90160364	90160707	0.0353504	0.00147529	mergeATAC_peak21012	4.2185	chr15:90	1.27171	SEMA4B	2.94678	ATAC > CNV	De novo increase
chr4	37648102	37648467	0.0187723	0.000517337	mergeATAC_peak44028	4.23441	chr4:37	1.28767	.	2.94674	ATAC > CNV	De novo increase
chr8	120089361	120089545	0.0360947	0.00151897	mergeATAC_peak60582	4.65764	chr8:120	1.71206	.	2.94559	ATAC > CNV	De novo increase
chr1	109509642	109509984	0.00412162	5.2969e-05	mergeATAC_peak2873	5.81664	chr1:109	2.87466	AMIGO1	2.94197	ATAC > CNV	De novo increase
chr1	112462250	112462501	0.0186304	0.000511158	mergeATAC_peak3027	4.45425	chr1:112	1.51252	MIR4256	2.94174	ATAC > CNV	De novo increase
chr7	74636342	74636637	0.0344199	0.00139222	mergeATAC_peak56133	3.95227	chr7:74	1.01525	.	2.93702	ATAC > CNV	De novo increase
chr9	96192799	96193028	0.0470618	0.00238491	mergeATAC_peak63164	4.55233	chr9:96	1.6157	.	2.93663	ATAC > CNV	De novo increase
chr1	160343187	160343555	0.0332835	0.00123818	mergeATAC_peak4186	5.05042	chr1:160	2.11608	NCSTN;COPA	2.93434	ATAC > CNV	De novo increase
chr1	230222208	230222485	0.0471681	0.00250364	mergeATAC_peak6332	4.36662	chr1:230	1.43369	.	2.93294	ATAC > CNV	De novo increase
chr17	8799014	8799589	0.00492497	6.71883e-05	mergeATAC_peak24395	4.56482	chr17:8	1.63259	MFSD6L	2.93224	ATAC > CNV	De novo increase
chr1	157490567	157490895	0.0453758	0.00209726	mergeATAC_peak4099	4.89776	chr1:157	1.96753	.	2.93023	ATAC > CNV	De novo increase
chr1	112704890	112705210	0.0136043	0.000308912	mergeATAC_peak3039	4.44246	chr1:112	1.51252	RHOC	2.92994	ATAC > CNV	De novo increase
chr8	143733389	143733584	0.0124661	0.000268278	mergeATAC_peak61505	6.16893	chr8:143	3.23947	MIR4664;FAM83H;IQANK1	2.92945	ATAC > CNV	De novo increase
chr19	8354018	8354264	0.0470618	0.00238491	mergeATAC_peak29176	4.08233	chr19:8	1.15602	.	2.92632	ATAC > CNV	De novo increase
chr21	31659419	31659686	0.018883	0.000521249	mergeATAC_peak37684	4.68666	chr21:31	1.76107	SOD1;SOD1-DT	2.92559	ATAC > CNV	De novo increase
chr17	75765129	75765342	0.0344199	0.00140871	mergeATAC_peak26829	4.49274	chr17:75	1.56766	GALK1	2.92509	ATAC > CNV	De novo increase
chr16	75517368	75517669	0.0353504	0.00147529	mergeATAC_peak23462	4.11197	chr16:75	1.18811	ENSG00000291051	2.92386	ATAC > CNV	De novo increase
chr9	11330	11663	0.0471681	0.00250364	mergeATAC_peak61626	4.03605	chr9:0	1.11842	DDX11L5	2.91764	ATAC > CNV	De novo increase
chr5	159156853	159157175	0.00634035	9.9419e-05	mergeATAC_peak49155	4.97542	chr5:159	2.06528	.	2.91014	ATAC > CNV	De novo increase
chr17	75667086	75667439	0.000595432	3.99363e-06	mergeATAC_peak26820	4.47762	chr17:75	1.56766	SAP30BP;RECQL5	2.90996	ATAC > CNV	De novo increase
chr2	208015507	208015991	0.0172708	0.000442988	mergeATAC_peak34896	4.10892	chr2:208	1.20552	.	2.9034	ATAC > CNV	De novo increase
chr8	144270434	144270613	0.0470618	0.00232958	mergeATAC_peak61561	5.78151	chr8:144	2.8808	.	2.90072	ATAC > CNV	De novo increase
chr7	81073609	81073936	0.018081	0.000486078	mergeATAC_peak56364	4.34337	chr7:81	1.44463	.	2.89874	ATAC > CNV	De novo increase
chr8	133496510	133496688	0.000847036	6.1063e-06	mergeATAC_peak61088	9.09087	chr8:133	6.19438	.	2.89648	ATAC > CNV	De novo increase
chr20	47200528	47200951	0.0232409	0.00068997	mergeATAC_peak36813	4.15911	chr20:47	1.26518	.	2.89393	ATAC > CNV	De novo increase
chr2	139374442	139374876	0.0470874	0.0024798	mergeATAC_peak33820	3.98228	chr2:139	1.09166	.	2.89062	ATAC > CNV	De novo increase
chr6	106746763	106747072	0.0181772	0.000490708	mergeATAC_peak52731	4.5896	chr6:106	1.70797	LINC02532	2.88163	ATAC > CNV	De novo increase
chr16	14109132	14109408	0.0332835	0.00123782	mergeATAC_peak21961	4.38232	chr16:14	1.50188	.	2.88045	ATAC > CNV	De novo increase
chr11	65108785	65109082	0.0181542	0.000489811	mergeATAC_peak10969	4.5683	chr11:65	1.69585	VPS51	2.87245	ATAC > CNV	De novo increase
chr6	156564446	156564681	0.0470618	0.00245032	mergeATAC_peak53944	4.22267	chr6:156	1.35154	.	2.87113	ATAC > CNV	De novo increase
chr8	132908348	132908498	0.0172965	0.000453774	mergeATAC_peak61046	7.07308	chr8:132	4.20475	.	2.86832	ATAC > CNV	De novo increase
chr16	19413282	19413572	0.0470618	0.0023054	mergeATAC_peak22112	4.50573	chr16:19	1.63973	.	2.866	ATAC > CNV	De novo increase
chr17	1684707	1685135	0.0470618	0.00224408	mergeATAC_peak23967	4.33823	chr17:1	1.4726	PRPF8;ENSG00000277597	2.86563	ATAC > CNV	De novo increase
chr1	198932721	198933060	0.0308695	0.00108218	mergeATAC_peak5132	4.26455	chr1:198	1.40397	.	2.86058	ATAC > CNV	De novo increase
chr9	111805886	111806307	0.026278	0.000891639	mergeATAC_peak63537	4.26729	chr9:111	1.40682	.	2.86047	ATAC > CNV	De novo increase
chr5	168179258	168179439	0.0180467	0.00048429	mergeATAC_peak49330	5.82942	chr5:168	2.96942	.	2.85999	ATAC > CNV	De novo increase
chr5	177591975	177592372	0.00192072	1.81115e-05	mergeATAC_peak49648	4.55177	chr5:177	1.69784	TMED9	2.85393	ATAC > CNV	De novo increase
chr8	112812083	112812637	2.07434e-05	6.84601e-08	mergeATAC_peak60391	9.21407	chr8:112	6.36229	.	2.85178	ATAC > CNV	De novo increase
chr5	159444532	159444759	0.0432079	0.00187615	mergeATAC_peak49175	4.91514	chr5:159	2.06528	.	2.84986	ATAC > CNV	De novo increase
chr21	34839573	34839798	0.0471442	0.00248946	mergeATAC_peak37819	4.38212	chr21:34	1.53792	.	2.8442	ATAC > CNV	De novo increase
chr8	98725787	98726345	3.42079e-07	5.82696e-10	mergeATAC_peak59883	8.227	chr8:98	5.38308	.	2.84392	ATAC > CNV	De novo increase
chr7	17374836	17375132	0.0186933	0.000513452	mergeATAC_peak54920	4.74293	chr7:17	1.90296	LINC02888	2.83997	ATAC > CNV	De novo increase
chr1	234957459	234957666	0.0344199	0.00140871	mergeATAC_peak6489	4.91866	chr1:234	2.07983	LINC02971	2.83883	ATAC > CNV	De novo increase
chr7	76931565	76931825	0.045301	0.00209218	mergeATAC_peak56253	4.43216	chr7:76	1.59521	.	2.83696	ATAC > CNV	De novo increase
chr7	8296145	8296385	0.0215283	0.000611623	mergeATAC_peak54746	4.10056	chr7:8	1.26559	.	2.83498	ATAC > CNV	De novo increase
chr1	165666176	165666708	0.0128935	0.000286496	mergeATAC_peak4394	5.19567	chr1:165	2.36698	ALDH9A1	2.82868	ATAC > CNV	De novo increase
chr1	162561558	162561825	0.034578	0.00141991	mergeATAC_peak4323	4.68386	chr1:162	1.86059	UAP1-DT;UAP1	2.82327	ATAC > CNV	De novo increase
chr4	11593797	11594229	0.00873304	0.000158299	mergeATAC_peak43722	3.88845	chr4:11	1.07483	.	2.81362	ATAC > CNV	De novo increase
chr8	128119299	128119633	2.26106e-06	5.08946e-09	mergeATAC_peak60917	7.18117	chr8:128	4.36839	PVT1	2.81278	ATAC > CNV	De novo increase
chr9	121992690	121992911	0.0470618	0.00241536	mergeATAC_peak63870	4.57699	chr9:121	1.76486	.	2.81213	ATAC > CNV	De novo increase
chr17	47229814	47230049	0.0344199	0.00140181	mergeATAC_peak25762	3.97653	chr17:47	1.17216	.	2.80437	ATAC > CNV	De novo increase
chr6	4615955	4616274	0.0132586	0.000298642	mergeATAC_peak49991	3.92241	chr6:4	1.12102	.	2.80139	ATAC > CNV	De novo increase
chr16	51408344	51408715	0.0357401	0.00149698	mergeATAC_peak22755	3.99075	chr16:51	1.18969	.	2.80105	ATAC > CNV	De novo increase
chr8	126570358	126570707	1.01469e-09	7.25315e-13	mergeATAC_peak60850	6.39169	chr8:126	3.59075	.	2.80094	ATAC > CNV	De novo increase
chr8	107525536	107525958	0.00152938	1.31332e-05	mergeATAC_peak60255	4.77768	chr8:107	1.97794	.	2.79974	ATAC > CNV	De novo increase
chr5	55227263	55227635	0.0116877	0.000234462	mergeATAC_peak47164	3.88348	chr5:55	1.08918	MCIDAS	2.7943	ATAC > CNV	De novo increase
chr9	35832896	35833094	0.0470874	0.00248575	mergeATAC_peak62206	3.95626	chr9:35	1.17018	.	2.78608	ATAC > CNV	De novo increase
chr1	210374415	210374628	0.0470618	0.00228992	mergeATAC_peak5706	4.04446	chr1:210	1.27287	RNU5A-8P	2.7716	ATAC > CNV	De novo increase
chr5	163505448	163505720	0.00445615	5.86636e-05	mergeATAC_peak49286	6.11939	chr5:163	3.35056	MAT2B	2.76883	ATAC > CNV	De novo increase
chr20	41643490	41643921	0.0450121	0.00203305	mergeATAC_peak36644	4.13194	chr20:41	1.36378	.	2.76816	ATAC > CNV	De novo increase
chr5	157328480	157328715	0.0252588	0.000842461	mergeATAC_peak49103	4.42316	chr5:157	1.65558	CYFIP2	2.76758	ATAC > CNV	De novo increase
chr11	34443155	34443571	0.00998376	0.000190258	mergeATAC_peak10308	4.23203	chr11:34	1.46512	.	2.76691	ATAC > CNV	De novo increase
chr1	229227473	229227756	0.00231795	2.28769e-05	mergeATAC_peak6299	4.11046	chr1:229	1.3457	ENSG00000233920	2.76476	ATAC > CNV	De novo increase
chr1	109178030	109178179	0.0089587	0.000163639	mergeATAC_peak2840	5.63728	chr1:109	2.87466	.	2.76262	ATAC > CNV	De novo increase
chr17	75675027	75675311	0.00312219	3.50654e-05	mergeATAC_peak26821	4.32932	chr17:75	1.56766	.	2.76166	ATAC > CNV	De novo increase
chr6	111709995	111710207	0.0470618	0.00227455	mergeATAC_peak52888	4.17334	chr6:111	1.41438	FYN	2.75896	ATAC > CNV	De novo increase
chr19	46298974	46299321	0.0490617	0.00264519	mergeATAC_peak30555	3.87076	chr19:46	1.11278	HIF3A	2.75799	ATAC > CNV	De novo increase
chr9	90069091	90069683	0.00700488	0.000114527	mergeATAC_peak62927	3.82005	chr9:90	1.06585	.	2.75421	ATAC > CNV	De novo increase
chr1	67414595	67415171	0.0355577	0.0014861	mergeATAC_peak2236	3.82207	chr1:67	1.07236	.	2.74971	ATAC > CNV	De novo increase
chr8	127870347	127871049	2.09369e-09	1.62397e-12	mergeATAC_peak60901	6.54291	chr8:127	3.79706	.	2.74585	ATAC > CNV	De novo increase
chr16	4538826	4539049	0.0470618	0.00239805	mergeATAC_peak21696	4.48585	chr16:4	1.74725	CDIP1	2.73861	ATAC > CNV	De novo increase
chr16	27264203	27264501	0.00236202	2.41766e-05	mergeATAC_peak22324	4.16314	chr16:27	1.42708	.	2.73605	ATAC > CNV	De novo increase
chr13	98990691	98991124	0.0230909	0.000676323	mergeATAC_peak16889	4.11266	chr13:98	1.38214	.	2.73052	ATAC > CNV	De novo increase
chr1	161530276	161530482	0.00132057	1.08857e-05	mergeATAC_peak4278	5.4547	chr1:161	2.73056	.	2.72414	ATAC > CNV	De novo increase
chr8	126534334	126534643	0.000100378	4.36618e-07	mergeATAC_peak60839	6.31427	chr8:126	3.59075	.	2.72352	ATAC > CNV	De novo increase
chr16	57467092	57467290	0.0047012	6.32775e-05	mergeATAC_peak22973	4.66947	chr16:57	1.94669	.	2.72279	ATAC > CNV	De novo increase
chr8	133360181	133360556	8.11902e-08	1.06194e-10	mergeATAC_peak61071	8.90767	chr8:133	6.19438	.	2.71328	ATAC > CNV	De novo increase
chr1	117268898	117269348	0.0470618	0.00245032	mergeATAC_peak3192	3.83909	chr1:117	1.1261	.	2.713	ATAC > CNV	De novo increase
chr17	19538462	19538734	0.0131883	0.000296657	mergeATAC_peak24726	4.01055	chr17:19	1.29784	.	2.71272	ATAC > CNV	De novo increase
chr1	146035498	146035777	0.00998376	0.000190258	mergeATAC_peak3417	4.1456	chr1:146	1.43514	HJV	2.71046	ATAC > CNV	De novo increase
chr17	915572	916233	0.00013035	6.1655e-07	mergeATAC_peak23891	4.0196	chr17:0	1.31121	.	2.70839	ATAC > CNV	De novo increase
chr21	43789321	43789656	0.0159582	0.000381292	mergeATAC_peak38228	3.914	chr21:43	1.21363	RRP1	2.70037	ATAC > CNV	De novo increase
chr1	152038513	152038925	0.00171869	1.55529e-05	mergeATAC_peak3747	3.95228	chr1:152	1.2529	.	2.69938	ATAC > CNV	De novo increase
chr22	20779807	20780075	0.0470618	0.00238491	mergeATAC_peak38534	4.02828	chr22:20	1.33241	SERPIND1	2.69587	ATAC > CNV	De novo increase
chr7	150903606	150903929	0.0185603	0.000507541	mergeATAC_peak57976	4.34406	chr7:150	1.6507	.	2.69336	ATAC > CNV	De novo increase
chr13	99307784	99308345	0.0470618	0.00239657	mergeATAC_peak16905	4.28888	chr13:99	1.5973	UBAC2;GPR183	2.69158	ATAC > CNV	De novo increase
chr9	111961658	111962048	0.00229429	2.24715e-05	mergeATAC_peak63550	4.09754	chr9:111	1.40682	.	2.69073	ATAC > CNV	De novo increase
chr5	172689027	172689319	0.0181162	0.000488235	mergeATAC_peak49470	4.91949	chr5:172	2.23566	.	2.68383	ATAC > CNV	De novo increase
chr21	41707581	41707834	0.0344199	0.00140871	mergeATAC_peak38095	4.39171	chr21:41	1.72584	.	2.66587	ATAC > CNV	De novo increase
chr19	42497761	42498149	0.0470618	0.00242246	mergeATAC_peak30353	4.05377	chr19:42	1.39164	.	2.66213	ATAC > CNV	De novo increase
chr8	135792479	135792910	0.00834464	0.000148107	mergeATAC_peak61183	9.39617	chr8:135	6.73882	.	2.65736	ATAC > CNV	De novo increase
chr17	1467954	1468285	0.0470618	0.00240361	mergeATAC_peak23945	4.12768	chr17:1	1.4726	MYO1C	2.65508	ATAC > CNV	De novo increase
chr1	149558568	149559071	0.00480047	6.49788e-05	mergeATAC_peak3544	4.22347	chr1:149	1.57364	.	2.64983	ATAC > CNV	De novo increase
chr4	11611693	11612199	0.0197915	0.000553552	mergeATAC_peak43725	3.72389	chr4:11	1.07483	.	2.64906	ATAC > CNV	De novo increase
chr20	50322243	50322523	0.00132246	1.09215e-05	mergeATAC_peak36936	5.07271	chr20:50	2.42544	LINC01271	2.64726	ATAC > CNV	De novo increase
chr20	63483037	63483591	0.0133319	0.000300697	mergeATAC_peak37296	4.20901	chr20:63	1.56202	.	2.64699	ATAC > CNV	De novo increase
chr9	128786954	128787379	0.0244133	0.000767021	mergeATAC_peak64171	3.93932	chr9:128	1.2925	TBC1D13	2.64683	ATAC > CNV	De novo increase
chr6	21103704	21104069	0.0471681	0.00249918	mergeATAC_peak50473	3.67945	chr6:21	1.04238	.	2.63707	ATAC > CNV	De novo increase
chr1	244336547	244336800	0.0232409	0.00068997	mergeATAC_peak6686	4.64535	chr1:244	2.01739	.	2.62796	ATAC > CNV	De novo increase
chr2	190863882	190864328	0.0261297	0.00088462	mergeATAC_peak34560	3.83486	chr2:190	1.21223	.	2.62263	ATAC > CNV	De novo increase
chr8	128794492	128794844	0.0162431	0.000392299	mergeATAC_peak60956	6.97689	chr8:128	4.36839	.	2.6085	ATAC > CNV	De novo increase
chr7	101154145	101154582	0.00297837	3.28408e-05	mergeATAC_peak56887	3.74218	chr7:101	1.13788	AP1S1	2.60429	ATAC > CNV	De novo increase
chr8	143038447	143038675	0.0323214	0.00119126	mergeATAC_peak61446	5.84068	chr8:143	3.23947	LINC02904	2.6012	ATAC > CNV	De novo increase
chr5	170791421	170791655	0.0185603	0.000507541	mergeATAC_peak49419	4.47865	chr5:170	1.87782	.	2.60083	ATAC > CNV	De novo increase
chr17	1332632	1332845	0.0344199	0.00140871	mergeATAC_peak23932	4.07302	chr17:1	1.4726	.	2.60041	ATAC > CNV	De novo increase
chr17	28326116	28326459	0.000650478	4.47166e-06	mergeATAC_peak24879	4.37414	chr17:28	1.77546	.	2.59868	ATAC > CNV	De novo increase
chr1	110630810	110631065	0.00324161	3.69267e-05	mergeATAC_peak2945	4.52131	chr1:110	1.92785	KCNA2	2.59345	ATAC > CNV	De novo increase
chr14	90336799	90337377	0.0127565	0.000279006	mergeATAC_peak18723	3.59602	chr14:90	1.00327	.	2.59275	ATAC > CNV	De novo increase
chr8	110329917	110330275	0.0344199	0.00139758	mergeATAC_peak60344	5.99174	chr8:110	3.40609	.	2.58565	ATAC > CNV	De novo increase
chr8	144373740	144374095	0.00937205	0.000174752	mergeATAC_peak61572	5.4623	chr8:144	2.8808	ADCK5	2.5815	ATAC > CNV	De novo increase
chr9	110183282	110183524	0.0136948	0.000311174	mergeATAC_peak63503	3.69053	chr9:110	1.10931	.	2.58122	ATAC > CNV	De novo increase
chr8	100264389	100264584	0.008272	0.000143246	mergeATAC_peak59941	10.2374	chr8:100	7.66417	RNF19A	2.57319	ATAC > CNV	De novo increase
chr5	161051978	161052594	0.000384253	2.33178e-06	mergeATAC_peak49258	4.44391	chr5:161	1.87224	.	2.57167	ATAC > CNV	De novo increase
chr1	149390187	149390624	0.0040723	5.17778e-05	mergeATAC_peak3532	4.14474	chr1:149	1.57364	NOTCH2NLC;ENSG00000286185	2.5711	ATAC > CNV	De novo increase
chr8	102128157	102128742	0.000324612	1.89199e-06	mergeATAC_peak60084	7.25349	chr8:102	4.68451	.	2.56898	ATAC > CNV	De novo increase
chr7	5397140	5397537	0.0470618	0.00242246	mergeATAC_peak54605	3.7977	chr7:5	1.22893	.	2.56877	ATAC > CNV	De novo increase
chr1	149398648	149399040	7.98043e-05	3.27709e-07	mergeATAC_peak3536	4.13778	chr1:149	1.57364	.	2.56414	ATAC > CNV	De novo increase
chr21	43335855	43336150	0.0142172	0.000327584	mergeATAC_peak38196	3.77311	chr21:43	1.21363	.	2.55948	ATAC > CNV	De novo increase
chr1	157969807	157970062	0.0182124	0.000492211	mergeATAC_peak4105	4.52573	chr1:157	1.96753	.	2.5582	ATAC > CNV	De novo increase
chr1	235450351	235450955	0.0450316	0.00203957	mergeATAC_peak6527	3.92755	chr1:235	1.37278	.	2.55478	ATAC > CNV	De novo increase
chr17	15646025	15646443	0.0134705	0.000304848	mergeATAC_peak24524	3.7879	chr17:15	1.2387	.	2.5492	ATAC > CNV	De novo increase
chr8	117004351	117004590	0.0259608	0.000878509	mergeATAC_peak60476	4.43249	chr8:117	1.88672	.	2.54577	ATAC > CNV	De novo increase
chr7	106365305	106365696	0.00628136	9.80164e-05	mergeATAC_peak57048	4.34885	chr7:106	1.80679	.	2.54206	ATAC > CNV	De novo increase
chr5	142229934	142230573	0.0120998	0.000247624	mergeATAC_peak48699	3.61261	chr5:142	1.07734	.	2.53528	ATAC > CNV	De novo increase
chr5	54533649	54534161	0.0089587	0.000163597	mergeATAC_peak47144	3.7363	chr5:54	1.20124	.	2.53505	ATAC > CNV	De novo increase
chr22	46352884	46353303	0.0470618	0.0023842	mergeATAC_peak39493	3.56951	chr22:46	1.0346	TRMU	2.53491	ATAC > CNV	De novo increase
chr16	11407533	11407787	0.0086606	0.000156086	mergeATAC_peak21884	4.40685	chr16:11	1.87657	.	2.53029	ATAC > CNV	De novo increase
chr5	88796736	88797193	0.044831	0.00201361	mergeATAC_peak47729	4.08887	chr5:88	1.55866	.	2.53022	ATAC > CNV	De novo increase
chr6	45473170	45473646	0.00066361	4.57203e-06	mergeATAC_peak51631	3.74211	chr6:45	1.21325	.	2.52886	ATAC > CNV	De novo increase
chr1	114369958	114370335	0.0120998	0.000248484	mergeATAC_peak3086	3.9023	chr1:114	1.37629	.	2.526	ATAC > CNV	De novo increase
chr20	53943813	53944000	0.0162431	0.000392299	mergeATAC_peak37083	4.06518	chr20:53	1.54604	.	2.51914	ATAC > CNV	De novo increase
chr8	142676001	142676422	0.000939719	6.9326e-06	mergeATAC_peak61421	5.71486	chr8:142	3.20182	.	2.51303	ATAC > CNV	De novo increase
chr1	207074552	207074767	0.018883	0.000521249	mergeATAC_peak5576	4.36665	chr1:207	1.85521	.	2.51144	ATAC > CNV	De novo increase
chr2	191866932	191867343	0.0348457	0.00144078	mergeATAC_peak34609	3.9598	chr2:191	1.44847	.	2.51133	ATAC > CNV	De novo increase
chr5	178236532	178236981	0.000251379	1.40694e-06	mergeATAC_peak49689	5.66254	chr5:178	3.15196	.	2.51058	ATAC > CNV	De novo increase
chr1	234997239	234997621	0.0128065	0.000281836	mergeATAC_peak6499	4.58974	chr1:234	2.07983	.	2.50992	ATAC > CNV	De novo increase
chr19	37312619	37313093	0.00475617	6.42345e-05	mergeATAC_peak30050	4.13567	chr19:37	1.63227	ZNF875	2.50339	ATAC > CNV	De novo increase
chr5	40808038	40808552	0.0470618	0.00246055	mergeATAC_peak46960	3.98604	chr5:40	1.4871	.	2.49894	ATAC > CNV	De novo increase
chr19	44500121	44500345	0.0344199	0.00137322	mergeATAC_peak30416	4.21768	chr19:44	1.72086	ZNF180	2.49681	ATAC > CNV	De novo increase
chr8	124848484	124848849	0.045301	0.00209218	mergeATAC_peak60757	4.99567	chr8:124	2.50338	LINC00964;ENSG00000255491	2.49229	ATAC > CNV	De novo increase
chr1	150532636	150532865	0.0344199	0.00139137	mergeATAC_peak3604	5.15029	chr1:150	2.6685	.	2.4818	ATAC > CNV	De novo increase
chr17	40915190	40915574	0.00628136	9.80158e-05	mergeATAC_peak25376	4.35947	chr17:40	1.87943	.	2.48004	ATAC > CNV	De novo increase
chr17	42380805	42381181	0.0128935	0.000286496	mergeATAC_peak25462	4.32906	chr17:42	1.85005	.	2.47901	ATAC > CNV	De novo increase
chr1	112464472	112464653	0.0470618	0.0023054	mergeATAC_peak3028	3.97946	chr1:112	1.51252	.	2.46694	ATAC > CNV	De novo increase
chr21	41778277	41778511	0.00233568	2.35874e-05	mergeATAC_peak38100	4.19085	chr21:41	1.72584	.	2.46502	ATAC > CNV	De novo increase
chr17	55332577	55333162	0.00752145	0.000127223	mergeATAC_peak26079	3.75795	chr17:55	1.30259	.	2.45537	ATAC > CNV	De novo increase
chr20	50409481	50409883	0.000443836	2.80811e-06	mergeATAC_peak36947	4.87948	chr20:50	2.42544	.	2.45403	ATAC > CNV	De novo increase
chr5	73565632	73566059	0.0471681	0.00250364	mergeATAC_peak47486	3.63581	chr5:73	1.18234	ANKRA2;UTP15	2.45347	ATAC > CNV	De novo increase
chr6	28982133	28982346	0.0347007	0.00143094	mergeATAC_peak50758	4.10403	chr6:28	1.65318	.	2.45085	ATAC > CNV	De novo increase
chr6	99178224	99178697	0.00916183	0.000168603	mergeATAC_peak52587	4.24241	chr6:99	1.79262	.	2.44979	ATAC > CNV	De novo increase
chr17	40330276	40330559	0.00681841	0.000109923	mergeATAC_peak25328	4.32464	chr17:40	1.87943	.	2.44522	ATAC > CNV	De novo increase
chr13	77492982	77493195	0.0470618	0.00224407	mergeATAC_peak16554	3.86895	chr13:77	1.42877	.	2.44018	ATAC > CNV	De novo increase
chr8	111043741	111043969	0.0230909	0.000677828	mergeATAC_peak60358	6.9522	chr8:111	4.51602	.	2.43618	ATAC > CNV	De novo increase
chr8	125607644	125607909	0.0344199	0.00139759	mergeATAC_peak60805	4.92559	chr8:125	2.49263	.	2.43296	ATAC > CNV	De novo increase
chr17	10115190	10115543	0.0347007	0.0014312	mergeATAC_peak24426	3.48286	chr17:10	1.05241	GAS7	2.43045	ATAC > CNV	De novo increase
chr7	96548666	96549075	0.045301	0.00209242	mergeATAC_peak56656	3.59517	chr7:96	1.1651	.	2.43007	ATAC > CNV	De novo increase
chr7	77487490	77487808	0.0266416	0.000911676	mergeATAC_peak56281	4.11068	chr7:77	1.68148	.	2.4292	ATAC > CNV	De novo increase
chr7	157387256	157387494	0.0470618	0.00232096	mergeATAC_peak58177	3.65812	chr7:157	1.23228	.	2.42584	ATAC > CNV	De novo increase
chr1	211655241	211655490	0.003524	4.2073e-05	mergeATAC_peak5745	3.78706	chr1:211	1.36445	.	2.42261	ATAC > CNV	De novo increase
chr8	135452424	135452677	4.64061e-08	5.7784e-11	mergeATAC_peak61168	9.16139	chr8:135	6.73882	.	2.42257	ATAC > CNV	De novo increase
chr6	28729243	28729493	0.0125277	0.000270495	mergeATAC_peak50741	4.07044	chr6:28	1.65318	.	2.41726	ATAC > CNV	De novo increase
chr19	2507123	2507521	0.045301	0.00209242	mergeATAC_peak28872	3.4709	chr19:2	1.05408	.	2.41682	ATAC > CNV	De novo increase
chr8	143828931	143829158	0.00450961	5.9583e-05	mergeATAC_peak61513	5.65388	chr8:143	3.23947	PUF60;ENSG00000287222	2.41441	ATAC > CNV	De novo increase
chr16	25828605	25828877	0.0141561	0.000325102	mergeATAC_peak22312	3.89127	chr16:25	1.47725	.	2.41402	ATAC > CNV	De novo increase
chr7	21585052	21585454	0.0046077	6.13182e-05	mergeATAC_peak55010	3.72045	chr7:21	1.30902	.	2.41144	ATAC > CNV	De novo increase
chr11	606268	606675	0.0198972	0.000557718	mergeATAC_peak9462	3.50574	chr11:0	1.09829	.	2.40745	ATAC > CNV	De novo increase
chr1	243325382	243325595	0.0452958	0.0020791	mergeATAC_peak6663	3.56507	chr1:243	1.16033	.	2.40474	ATAC > CNV	De novo increase
chr17	49821963	49822250	0.0470618	0.00246055	mergeATAC_peak25895	3.93236	chr17:49	1.5292	KAT7	2.40316	ATAC > CNV	De novo increase
chr17	74301212	74301445	0.0264786	0.00090328	mergeATAC_peak26713	3.78043	chr17:74	1.38106	.	2.39937	ATAC > CNV	De novo increase
chr1	94602403	94602740	0.0349451	0.00144827	mergeATAC_peak2635	3.83526	chr1:94	1.43924	.	2.39603	ATAC > CNV	De novo increase
chr1	161506884	161507232	0.0470618	0.00231319	mergeATAC_peak4273	5.12637	chr1:161	2.73056	FCGR2A	2.39581	ATAC > CNV	De novo increase
chr16	57955681	57955893	0.00970655	0.000183056	mergeATAC_peak23022	4.34086	chr16:57	1.94669	.	2.39417	ATAC > CNV	De novo increase
chr8	143553889	143554145	0.000982349	7.44034e-06	mergeATAC_peak61483	5.63044	chr8:143	3.23947	GSDMD	2.39096	ATAC > CNV	De novo increase
chr8	141001190	141001493	0.00413466	5.31995e-05	mergeATAC_peak61333	6.46425	chr8:141	4.07364	PTK2	2.39061	ATAC > CNV	De novo increase
chr5	172462254	172462480	0.035045	0.00145388	mergeATAC_peak49464	4.6237	chr5:172	2.23566	.	2.38805	ATAC > CNV	De novo increase
chr7	23546967	23547276	0.0369778	0.00157526	mergeATAC_peak55074	3.65806	chr7:23	1.27098	.	2.38708	ATAC > CNV	De novo increase
chr1	204989358	204989613	0.018566	0.000508416	mergeATAC_peak5423	3.67089	chr1:204	1.28473	NFASC	2.38615	ATAC > CNV	De novo increase
chr6	35202198	35202665	0.0475685	0.00253068	mergeATAC_peak51183	3.68149	chr6:35	1.29749	.	2.38401	ATAC > CNV	De novo increase
chr1	173420344	173420674	0.00606193	9.33938e-05	mergeATAC_peak4640	3.74961	chr1:173	1.36715	PRDX6-AS1	2.38247	ATAC > CNV	De novo increase
chr1	162300168	162300643	0.0184177	0.000501067	mergeATAC_peak4317	4.24083	chr1:162	1.86059	.	2.38024	ATAC > CNV	De novo increase
chr1	173682105	173682569	0.0470618	0.00232958	mergeATAC_peak4648	3.74634	chr1:173	1.36715	.	2.3792	ATAC > CNV	De novo increase
chr17	47315746	47315981	0.0101847	0.000194706	mergeATAC_peak25768	3.55118	chr17:47	1.17216	.	2.37902	ATAC > CNV	De novo increase
chr7	101608729	101609162	0.0176487	0.000465168	mergeATAC_peak56913	3.51322	chr7:101	1.13788	.	2.37533	ATAC > CNV	De novo increase
chr10	5089878	5090179	0.0470618	0.00244901	mergeATAC_peak6904	3.44737	chr10:5	1.07291	.	2.37446	ATAC > CNV	De novo increase
chr8	135456970	135457532	5.63795e-12	1.54344e-15	mergeATAC_peak61171	9.10616	chr8:135	6.73882	KHDRBS3;ENSG00000254372	2.36735	ATAC > CNV	De novo increase
chr8	143023981	143024278	0.000922388	6.77577e-06	mergeATAC_peak61442	5.6062	chr8:143	3.23947	.	2.36673	ATAC > CNV	De novo increase
chr7	131556478	131556812	0.0471681	0.00249918	mergeATAC_peak57570	3.6283	chr7:131	1.27409	PODXL	2.35421	ATAC > CNV	De novo increase
chr7	150852285	150852734	0.045301	0.00209218	mergeATAC_peak57973	3.99867	chr7:150	1.6507	AOC1	2.34796	ATAC > CNV	De novo increase
chr17	3754508	3754723	0.0470618	0.00246798	mergeATAC_peak24070	3.53609	chr17:3	1.19298	ITGAE	2.34311	ATAC > CNV	De novo increase
chr8	103034737	103035159	1.61719e-07	2.38578e-10	mergeATAC_peak60148	7.69916	chr8:103	5.36278	.	2.33638	ATAC > CNV	De novo increase
chr9	134299807	134300206	0.0324301	0.00119607	mergeATAC_peak64447	3.53149	chr9:134	1.19834	.	2.33315	ATAC > CNV	De novo increase
chr21	43609512	43609884	0.02581	0.000871092	mergeATAC_peak38207	3.54647	chr21:43	1.21363	MIR6070	2.33284	ATAC > CNV	De novo increase
chr20	47352531	47352858	0.0478633	0.00255801	mergeATAC_peak36823	3.5974	chr20:47	1.26518	ZMYND8;ENSG00000231119;ENSG00000289329	2.33222	ATAC > CNV	De novo increase
chr8	143070985	143071232	0.0052055	7.42613e-05	mergeATAC_peak61452	5.57015	chr8:143	3.23947	.	2.33068	ATAC > CNV	De novo increase
chr5	160287413	160287854	0.00120125	9.6392e-06	mergeATAC_peak49221	5.18323	chr5:160	2.86412	.	2.31911	ATAC > CNV	De novo increase
chr9	111965487	111965784	0.0355577	0.00148609	mergeATAC_peak63551	3.72252	chr9:111	1.40682	.	2.3157	ATAC > CNV	De novo increase
chr21	36117229	36117560	0.00345966	4.0726e-05	mergeATAC_peak37854	3.78192	chr21:36	1.46781	.	2.31411	ATAC > CNV	De novo increase
chr5	43000414	43000831	0.0259608	0.00087848	mergeATAC_peak47003	4.11036	chr5:43	1.79857	.	2.31179	ATAC > CNV	De novo increase
chr1	229221733	229222083	0.0102014	0.000195181	mergeATAC_peak6298	3.64847	chr1:229	1.3457	.	2.30277	ATAC > CNV	De novo increase
chr1	235062372	235062780	0.0178618	0.000475652	mergeATAC_peak6501	3.67424	chr1:235	1.37278	.	2.30146	ATAC > CNV	De novo increase
chr1	204162145	204162386	0.0476032	0.00253976	mergeATAC_peak5386	3.58392	chr1:204	1.28473	.	2.29919	ATAC > CNV	De novo increase
chr7	1169889	1170146	0.0265921	0.000909578	mergeATAC_peak54461	3.54424	chr7:1	1.24522	.	2.29902	ATAC > CNV	De novo increase
chr1	150629058	150629384	1.57134e-06	3.29796e-09	mergeATAC_peak3618	4.96743	chr1:150	2.6685	ENSA;ENSG00000288880	2.29893	ATAC > CNV	De novo increase
chr8	140995894	140996129	0.000628783	4.30339e-06	mergeATAC_peak61332	5.86131	chr8:140	3.56306	.	2.29825	ATAC > CNV	De novo increase
chr1	229093555	229093890	0.0360273	0.00151394	mergeATAC_peak6291	3.64374	chr1:229	1.3457	.	2.29804	ATAC > CNV	De novo increase
chr7	66306274	66306529	0.0192793	0.000537174	mergeATAC_peak55920	3.63137	chr7:66	1.33995	.	2.29142	ATAC > CNV	De novo increase
chr7	45111654	45112152	0.00615216	9.52517e-05	mergeATAC_peak55618	3.55913	chr7:45	1.26796	TBRG4	2.29117	ATAC > CNV	De novo increase
chr20	45910743	45911193	0.0344742	0.00141146	mergeATAC_peak36765	4.04298	chr20:45	1.75187	PLTP	2.29112	ATAC > CNV	De novo increase
chr16	50668641	50669026	0.0108261	0.000211007	mergeATAC_peak22736	3.84897	chr16:50	1.56238	.	2.28659	ATAC > CNV	De novo increase
chr5	170435055	170435285	0.00298141	3.2965e-05	mergeATAC_peak49404	4.16297	chr5:170	1.87782	.	2.28515	ATAC > CNV	De novo increase
chr17	38351598	38352057	0.00623764	9.71445e-05	mergeATAC_peak25170	3.41441	chr17:38	1.1319	SOCS7	2.28251	ATAC > CNV	De novo increase
chr6	149840646	149840962	0.0427897	0.00185408	mergeATAC_peak53767	3.65349	chr6:149	1.37156	.	2.28193	ATAC > CNV	De novo increase
chr1	149391608	149391859	0.0311648	0.00109585	mergeATAC_peak3534	3.8552	chr1:149	1.57364	NOTCH2NLC;ENSG00000286185	2.28156	ATAC > CNV	De novo increase
chr1	151539513	151539918	2.87895e-05	1.00707e-07	mergeATAC_peak3695	5.24545	chr1:151	2.96475	TUFT1;ENSG00000232536	2.28071	ATAC > CNV	De novo increase
chr1	204078093	204078629	0.00358077	4.29686e-05	mergeATAC_peak5380	3.56542	chr1:204	1.28473	SOX13	2.28068	ATAC > CNV	De novo increase
chr8	135828603	135828867	0.00565758	8.46687e-05	mergeATAC_peak61184	9.01864	chr8:135	6.73882	.	2.27983	ATAC > CNV	De novo increase
chr21	42818329	42818547	0.045301	0.00209242	mergeATAC_peak38173	3.92333	chr21:42	1.64538	.	2.27795	ATAC > CNV	De novo increase
chr5	61312458	61312867	0.0172708	0.000448766	mergeATAC_peak47299	3.52594	chr5:61	1.25583	.	2.27011	ATAC > CNV	De novo increase
chr17	50026878	50027121	0.0344199	0.00129149	mergeATAC_peak25912	4.58822	chr17:50	2.32619	.	2.26204	ATAC > CNV	De novo increase
chr5	172451287	172451500	0.00634035	9.9419e-05	mergeATAC_peak49462	4.4975	chr5:172	2.23566	.	2.26184	ATAC > CNV	De novo increase
chr16	57374330	57374594	0.0138322	0.000315348	mergeATAC_peak22965	4.20581	chr16:57	1.94669	.	2.25912	ATAC > CNV	De novo increase
chr9	70607263	70607736	0.0179761	0.000481177	mergeATAC_peak62473	3.88802	chr9:70	1.62941	.	2.25862	ATAC > CNV	De novo increase
chr13	97212842	97213077	0.0262767	0.000890797	mergeATAC_peak16831	3.88245	chr13:97	1.62411	.	2.25835	ATAC > CNV	De novo increase
chr7	112942794	112943313	0.015148	0.000354331	mergeATAC_peak57161	3.7886	chr7:112	1.53101	.	2.25758	ATAC > CNV	De novo increase
chr17	16521236	16521562	0.0051191	7.18609e-05	mergeATAC_peak24565	3.75343	chr17:16	1.49885	.	2.25458	ATAC > CNV	De novo increase
chr21	43783198	43783521	0.0351597	0.00146063	mergeATAC_peak38226	3.46259	chr21:43	1.21363	TMEM97P1	2.24896	ATAC > CNV	De novo increase
chr21	26769714	26769919	0.0344199	0.0014087	mergeATAC_peak37576	4.213	chr21:26	1.96706	.	2.24594	ATAC > CNV	De novo increase
chr7	152431393	152431767	0.00970663	0.000183353	mergeATAC_peak58070	3.56989	chr7:152	1.32398	.	2.24591	ATAC > CNV	De novo increase
chr8	101590115	101590597	4.70501e-06	1.21649e-08	mergeATAC_peak60051	7.43215	chr8:101	5.18747	.	2.24468	ATAC > CNV	De novo increase
chr13	97258166	97258426	0.0470618	0.00243266	mergeATAC_peak16835	3.86125	chr13:97	1.62411	.	2.23714	ATAC > CNV	De novo increase
chr5	163459845	163460164	0.0184177	0.000501961	mergeATAC_peak49283	5.58505	chr5:163	3.35056	HMMR;NUDCD2	2.23449	ATAC > CNV	De novo increase
chr8	139029241	139029479	0.0470618	0.00229335	mergeATAC_peak61262	5.90925	chr8:139	3.67788	.	2.23137	ATAC > CNV	De novo increase
chr9	122350638	122350893	0.00931513	0.000173408	mergeATAC_peak63886	4.04681	chr9:122	1.8175	.	2.22931	ATAC > CNV	De novo increase
chr2	95297185	95297432	0.0482506	0.00259485	mergeATAC_peak32971	3.45344	chr2:95	1.22858	KCNIP3	2.22487	ATAC > CNV	De novo increase
chr5	178585213	178585494	0.00192153	1.81775e-05	mergeATAC_peak49699	5.37024	chr5:178	3.15196	.	2.21828	ATAC > CNV	De novo increase
chr7	36153088	36153378	0.0140767	0.000322636	mergeATAC_peak55391	3.93235	chr7:36	1.71592	EEPD1	2.21644	ATAC > CNV	De novo increase
chr16	19086536	19086823	0.0351957	0.00146454	mergeATAC_peak22085	3.8548	chr16:19	1.63973	ENSG00000260430	2.21507	ATAC > CNV	De novo increase
chr1	169167904	169168348	0.00234318	2.377e-05	mergeATAC_peak4505	3.7701	chr1:169	1.56259	.	2.20751	ATAC > CNV	De novo increase
chr8	97640406	97640699	1.26772e-05	3.68259e-08	mergeATAC_peak59839	4.63477	chr8:97	2.43075	.	2.20401	ATAC > CNV	De novo increase
chr17	64306952	64307182	0.00998376	0.000190097	mergeATAC_peak26417	3.92981	chr17:64	1.73317	.	2.19664	ATAC > CNV	De novo increase
chr7	106058542	106058843	0.0360947	0.00151897	mergeATAC_peak57034	4.0002	chr7:106	1.80679	.	2.19341	ATAC > CNV	De novo increase
chr7	77581053	77581285	0.0471681	0.00250364	mergeATAC_peak56286	3.86972	chr7:77	1.68148	.	2.18823	ATAC > CNV	De novo increase
chr2	208175413	208175631	0.0352651	0.00147037	mergeATAC_peak34906	3.39347	chr2:208	1.20552	.	2.18795	ATAC > CNV	De novo increase
chr17	57016652	57017136	0.0100231	0.000191161	mergeATAC_peak26125	3.74729	chr17:57	1.57139	.	2.1759	ATAC > CNV	De novo increase
chr8	107771861	107772232	0.0345958	0.00142117	mergeATAC_peak60262	4.14796	chr8:107	1.97794	.	2.17002	ATAC > CNV	De novo increase
chr7	137963000	137963458	0.000751676	5.30452e-06	mergeATAC_peak57662	3.41112	chr7:137	1.24277	.	2.16834	ATAC > CNV	De novo increase
chr1	146052175	146052681	0.045301	0.00209242	mergeATAC_peak3419	3.59514	chr1:146	1.43514	LINC01719;RNVU1-6;ENSG00000287190	2.16	ATAC > CNV	De novo increase
chr5	179051698	179052146	0.00873304	0.000158321	mergeATAC_peak49715	4.95587	chr5:179	2.79799	.	2.15788	ATAC > CNV	De novo increase
chr15	78348060	78348423	0.0480701	0.00257637	mergeATAC_peak20658	3.17159	chr15:78	1.01429	CRABP1	2.1573	ATAC > CNV	De novo increase
chr7	138007894	138008323	0.00231823	2.32304e-05	mergeATAC_peak57667	3.69015	chr7:138	1.53345	.	2.1567	ATAC > CNV	De novo increase
chr17	55259664	55259997	0.0464371	0.00215338	mergeATAC_peak26073	3.45789	chr17:55	1.30259	.	2.1553	ATAC > CNV	De novo increase
chr7	107122459	107122958	0.0317048	0.0011296	mergeATAC_peak57075	3.189	chr7:107	1.0366	.	2.1524	ATAC > CNV	De novo increase
chr5	178153632	178154255	7.53661e-07	1.42133e-09	mergeATAC_peak49683	5.30349	chr5:178	3.15196	NHP2;ENSG00000289726	2.15152	ATAC > CNV	De novo increase
chr6	33118586	33118836	0.02673	0.000915922	mergeATAC_peak51076	3.85958	chr6:33	1.70976	.	2.14982	ATAC > CNV	De novo increase
chr8	98999837	99000175	0.000260222	1.47226e-06	mergeATAC_peak59907	5.34112	chr8:99	3.19132	.	2.14979	ATAC > CNV	De novo increase
chr17	51105707	51105927	0.0427897	0.00185408	mergeATAC_peak26020	3.55512	chr17:51	1.40843	.	2.14669	ATAC > CNV	De novo increase
chr2	120675388	120675808	0.0023694	2.43964e-05	mergeATAC_peak33556	3.39685	chr2:120	1.25179	.	2.14506	ATAC > CNV	De novo increase
chr8	123220713	123220900	0.0470874	0.00247979	mergeATAC_peak60666	4.01869	chr8:123	1.87538	.	2.14331	ATAC > CNV	De novo increase
chr8	140256776	140257178	4.30732e-06	1.09401e-08	mergeATAC_peak61300	5.70215	chr8:140	3.56306	.	2.13909	ATAC > CNV	De novo increase
chr21	36188081	36188694	0.00231823	2.33406e-05	mergeATAC_peak37863	3.60565	chr21:36	1.46781	.	2.13784	ATAC > CNV	De novo increase
chr1	198929941	198930262	0.00465039	6.21693e-05	mergeATAC_peak5130	3.54116	chr1:198	1.40397	.	2.13719	ATAC > CNV	De novo increase
chr21	32832916	32833125	0.0197915	0.000553552	mergeATAC_peak37748	3.70704	chr21:32	1.57276	.	2.13428	ATAC > CNV	De novo increase
chr1	186054975	186055318	0.0134705	0.000304848	mergeATAC_peak4994	3.38835	chr1:186	1.25815	.	2.1302	ATAC > CNV	De novo increase
chr9	133244591	133244922	0.0089587	0.000163597	mergeATAC_peak64377	3.60777	chr9:133	1.47955	.	2.12822	ATAC > CNV	De novo increase
chr8	98817262	98817920	1.47517e-18	4.48714e-23	mergeATAC_peak59887	7.5112	chr8:98	5.38308	.	2.12812	ATAC > CNV	De novo increase
chr9	87506341	87506707	0.00337995	3.92321e-05	mergeATAC_peak62833	3.40721	chr9:87	1.27953	.	2.12768	ATAC > CNV	De novo increase
chr5	150540979	150541489	0.00955207	0.000179562	mergeATAC_peak48920	4.28953	chr5:150	2.16571	.	2.12382	ATAC > CNV	De novo increase
chr17	27345513	27345740	0.034578	0.00141991	mergeATAC_peak24828	4.33059	chr17:27	2.21473	.	2.11586	ATAC > CNV	De novo increase
chr16	28264738	28265046	0.0473361	0.00251543	mergeATAC_peak22344	3.15432	chr16:28	1.04161	.	2.11271	ATAC > CNV	De novo increase
chr1	200487421	200487798	0.0023694	2.43603e-05	mergeATAC_peak5177	3.68431	chr1:200	1.57777	.	2.10654	ATAC > CNV	De novo increase
chr12	93541804	93542317	0.0246077	0.000808019	mergeATAC_peak14618	3.2202	chr12:93	1.11502	.	2.10517	ATAC > CNV	De novo increase
chr8	102108011	102108634	0.000228952	1.25169e-06	mergeATAC_peak60080	6.78688	chr8:102	4.68451	.	2.10237	ATAC > CNV	De novo increase
chr17	51088897	51089250	0.0338776	0.00126646	mergeATAC_peak26017	3.50991	chr17:51	1.40843	.	2.10148	ATAC > CNV	De novo increase
chr1	228930477	228930995	0.0360947	0.00151897	mergeATAC_peak6281	3.95987	chr1:228	1.85919	.	2.10068	ATAC > CNV	De novo increase
chr1	207775942	207776415	0.0476032	0.00253837	mergeATAC_peak5613	3.9556	chr1:207	1.85521	.	2.10039	ATAC > CNV	De novo increase
chr6	137309230	137309616	0.0185618	0.000507865	mergeATAC_peak53443	3.26694	chr6:137	1.16873	.	2.09821	ATAC > CNV	De novo increase
chr1	201559721	201559977	0.0179058	0.000477935	mergeATAC_peak5244	3.92767	chr1:201	1.83592	.	2.09175	ATAC > CNV	De novo increase
chr1	112369696	112369976	0.0344199	0.00131698	mergeATAC_peak3022	3.60303	chr1:112	1.51252	.	2.09051	ATAC > CNV	De novo increase
chr1	222792859	222793049	0.0348457	0.00144256	mergeATAC_peak5996	3.5707	chr1:222	1.48225	.	2.08845	ATAC > CNV	De novo increase
chr6	150717367	150717806	0.00302019	3.35316e-05	mergeATAC_peak53825	3.60536	chr6:150	1.5195	.	2.08586	ATAC > CNV	De novo increase
chr1	211920311	211920607	0.0250292	0.000830615	mergeATAC_peak5753	3.44243	chr1:211	1.36445	.	2.07797	ATAC > CNV	De novo increase
chr5	176574102	176574344	0.0137556	0.000313393	mergeATAC_peak49592	3.57187	chr5:176	1.49745	.	2.07443	ATAC > CNV	De novo increase
chr8	126843533	126843815	0.0129391	0.000287705	mergeATAC_peak60859	5.66442	chr8:126	3.59075	.	2.07367	ATAC > CNV	De novo increase
chr8	141101178	141101490	0.00410149	5.25232e-05	mergeATAC_peak61346	6.14181	chr8:141	4.07364	.	2.06816	ATAC > CNV	De novo increase
chr17	27540865	27541074	0.0470618	0.00246055	mergeATAC_peak24842	4.28283	chr17:27	2.21473	.	2.0681	ATAC > CNV	De novo increase
chr19	35352821	35353035	0.0470618	0.00242147	mergeATAC_peak29965	3.12573	chr19:35	1.06012	.	2.06561	ATAC > CNV	De novo increase
chr4	121823809	121824173	0.0259009	0.000875691	mergeATAC_peak45285	3.21049	chr4:121	1.15101	CCNA2	2.05947	ATAC > CNV	De novo increase
chr1	114505155	114505755	0.000932998	6.8679e-06	mergeATAC_peak3087	3.43543	chr1:114	1.37629	.	2.05914	ATAC > CNV	De novo increase
chr6	33297436	33297820	0.0244227	0.00079823	mergeATAC_peak51094	3.76888	chr6:33	1.70976	RGL2	2.05912	ATAC > CNV	De novo increase
chr6	143896569	143896875	0.045301	0.00209218	mergeATAC_peak53605	3.31296	chr6:143	1.25562	.	2.05734	ATAC > CNV	De novo increase
chr5	159877822	159878141	0.0168068	0.000409748	mergeATAC_peak49190	4.11879	chr5:159	2.06528	.	2.05351	ATAC > CNV	De novo increase
chr9	93004145	93004514	0.0271478	0.000935193	mergeATAC_peak63019	3.57377	chr9:93	1.52556	.	2.0482	ATAC > CNV	De novo increase
chr5	271152	271780	0.0106385	0.000206294	mergeATAC_peak46278	3.34715	chr5:0	1.30227	PDCD6-DT;PDCD6-AHRR;PDCD6	2.04489	ATAC > CNV	De novo increase
chr16	25066775	25067143	0.0190806	0.000529606	mergeATAC_peak22296	3.52055	chr16:25	1.47725	LINC02175	2.0433	ATAC > CNV	De novo increase
chr5	180861264	180862035	0.000173295	8.96114e-07	mergeATAC_peak49786	4.42337	chr5:180	2.38985	ZFP62	2.03352	ATAC > CNV	De novo increase
chr6	170554212	170554665	0.0244133	0.000782882	mergeATAC_peak54381	3.0861	chr6:170	1.05362	TBP;PSMB1	2.03248	ATAC > CNV	De novo increase
chr20	44204190	44204535	0.0244133	0.000744166	mergeATAC_peak36679	3.30836	chr20:44	1.27851	.	2.02985	ATAC > CNV	De novo increase
chr16	65717	65998	0.015148	0.000354148	mergeATAC_peak21317	3.44317	chr16:0	1.41599	RHBDF1	2.02718	ATAC > CNV	De novo increase
chr8	143736133	143736290	0.0064815	0.000102618	mergeATAC_peak61507	5.2609	chr8:143	3.23947	.	2.02142	ATAC > CNV	De novo increase
chr5	179023566	179024184	4.64061e-08	5.78744e-11	mergeATAC_peak49714	4.81789	chr5:179	2.79799	ZNF879	2.0199	ATAC > CNV	De novo increase
chr17	59465017	59465517	0.0262879	0.000893174	mergeATAC_peak26223	3.29244	chr17:59	1.27411	.	2.01833	ATAC > CNV	De novo increase
chr11	26580972	26581355	0.0289219	0.00100202	mergeATAC_peak10175	3.01572	chr11:26	1.00046	.	2.01526	ATAC > CNV	De novo increase
chr6	163391999	163392349	0.0470618	0.00236377	mergeATAC_peak54164	3.59719	chr6:163	1.58533	.	2.01186	ATAC > CNV	De novo increase
chr8	98862653	98863144	2.89443e-10	1.76084e-13	mergeATAC_peak59893	7.39136	chr8:98	5.38308	.	2.00829	ATAC > CNV	De novo increase
chr16	19437321	19437647	0.045301	0.00209218	mergeATAC_peak22116	3.6471	chr16:19	1.63973	.	2.00737	ATAC > CNV	De novo increase
chr16	52551725	52552004	0.0470618	0.0022586	mergeATAC_peak22773	3.22958	chr16:52	1.22707	.	2.00251	ATAC > CNV	De novo increase
chr8	132480960	132481348	0.000553416	3.61083e-06	mergeATAC_peak61034	6.20378	chr8:132	4.20475	KCNQ3	1.99902	ATAC > CNV	De novo increase
chr9	92133985	92134272	0.0371972	0.00158517	mergeATAC_peak62999	3.06324	chr9:92	1.06451	.	1.99873	ATAC > CNV	De novo increase
chr7	96308365	96308745	0.00518048	7.33638e-05	mergeATAC_peak56650	3.1635	chr7:96	1.1651	SLC25A13	1.9984	ATAC > CNV	De novo increase
chr17	82838365	82838676	0.0344199	0.00129993	mergeATAC_peak27320	3.69084	chr17:82	1.69737	.	1.99347	ATAC > CNV	De novo increase
chr9	134200785	134201076	0.0348457	0.00144216	mergeATAC_peak64445	3.19013	chr9:134	1.19834	.	1.99179	ATAC > CNV	De novo increase
chr16	12088111	12088394	0.0471681	0.00250364	mergeATAC_peak21937	3.26362	chr16:12	1.27969	.	1.98393	ATAC > CNV	De novo increase
chr8	143029375	143029580	0.0023694	2.43307e-05	mergeATAC_peak61444	5.22191	chr8:143	3.23947	.	1.98244	ATAC > CNV	De novo increase
chr17	64321080	64321434	0.00508233	7.08317e-05	mergeATAC_peak26420	3.71559	chr17:64	1.73317	.	1.98242	ATAC > CNV	De novo increase
chr8	140479823	140480170	0.00222389	2.16805e-05	mergeATAC_peak61312	5.54107	chr8:140	3.56306	.	1.97801	ATAC > CNV	De novo increase
chr8	123310769	123311229	0.000117726	5.42515e-07	mergeATAC_peak60671	3.85032	chr8:123	1.87538	.	1.97494	ATAC > CNV	De novo increase
chr7	2527764	2528014	0.0264786	0.00090328	mergeATAC_peak54519	3.11513	chr7:2	1.14176	MIR4648	1.97337	ATAC > CNV	De novo increase
chr1	150577240	150577426	0.0470618	0.00240361	mergeATAC_peak3610	4.64175	chr1:150	2.6685	.	1.97325	ATAC > CNV	De novo increase
chr7	95342047	95342329	0.0344199	0.00133422	mergeATAC_peak56617	3.42541	chr7:95	1.45652	.	1.96889	ATAC > CNV	De novo increase
chr1	108881394	108881788	0.00130112	1.07056e-05	mergeATAC_peak2824	3.56812	chr1:108	1.60047	.	1.96765	ATAC > CNV	De novo increase
chr16	22766	23031	0.024718	0.000814271	mergeATAC_peak21312	3.38295	chr16:0	1.41599	WASIR2	1.96696	ATAC > CNV	De novo increase
chr1	214467202	214467543	0.0450557	0.00205267	mergeATAC_peak5835	3.67795	chr1:214	1.7131	.	1.96484	ATAC > CNV	De novo increase
chr1	244074540	244074910	0.0257045	0.000866318	mergeATAC_peak6674	3.98034	chr1:244	2.01739	.	1.96295	ATAC > CNV	De novo increase
chr8	101791735	101791898	0.0231303	0.000683874	mergeATAC_peak60068	7.14754	chr8:101	5.18747	NCALD	1.96007	ATAC > CNV	De novo increase
chr1	242611109	242611649	0.0189518	0.000525239	mergeATAC_peak6649	3.28832	chr1:242	1.32906	.	1.95926	ATAC > CNV	De novo increase
chr5	154945803	154945972	0.0344199	0.00136381	mergeATAC_peak49071	4.58726	chr5:154	2.6285	.	1.95876	ATAC > CNV	De novo increase
chr8	143902574	143902795	0.00312219	3.50915e-05	mergeATAC_peak61522	5.19729	chr8:143	3.23947	.	1.95782	ATAC > CNV	De novo increase
chr1	199667154	199667618	0.0470874	0.00248202	mergeATAC_peak5142	3.28305	chr1:199	1.32769	.	1.95536	ATAC > CNV	De novo increase
chr7	150898548	150898871	0.00469353	6.30315e-05	mergeATAC_peak57975	3.60594	chr7:150	1.6507	.	1.95524	ATAC > CNV	De novo increase
chr9	129790381	129790671	0.0244133	0.000763296	mergeATAC_peak64243	3.38333	chr9:129	1.43556	UBE2V1P4	1.94776	ATAC > CNV	De novo increase
chr17	21511633	21511878	0.0470618	0.00245032	mergeATAC_peak24791	3.98693	chr17:21	2.03972	.	1.94721	ATAC > CNV	De novo increase
chr21	43618804	43619318	0.0290264	0.00100653	mergeATAC_peak38209	3.1578	chr21:43	1.21363	.	1.94417	ATAC > CNV	De novo increase
chr5	172740860	172741118	0.0246229	0.000808891	mergeATAC_peak49480	4.17909	chr5:172	2.23566	.	1.94343	ATAC > CNV	De novo increase
chr20	63863842	63864054	0.0470874	0.0024798	mergeATAC_peak37327	3.50526	chr20:63	1.56202	ENSG00000268858	1.94324	ATAC > CNV	De novo increase
chr7	23597173	23597449	0.0470618	0.00244901	mergeATAC_peak55076	3.20988	chr7:23	1.27098	CCDC126	1.9389	ATAC > CNV	De novo increase
chr4	18942769	18943223	0.0102739	0.000197174	mergeATAC_peak43841	3.09324	chr4:18	1.16087	.	1.93237	ATAC > CNV	De novo increase
chr5	177425848	177426100	0.0131883	0.000295826	mergeATAC_peak49633	3.62871	chr5:177	1.69784	GRK6	1.93087	ATAC > CNV	De novo increase
chr9	122159736	122160049	0.0255095	0.000854312	mergeATAC_peak63878	3.74359	chr9:122	1.8175	MORN5;NDUFA8	1.92609	ATAC > CNV	De novo increase
chr6	142902563	142903025	0.0347007	0.00143286	mergeATAC_peak53575	3.41671	chr6:142	1.49383	.	1.92288	ATAC > CNV	De novo increase
chr1	151458375	151458664	0.00943016	0.000176696	mergeATAC_peak3685	4.88672	chr1:151	2.96475	POGZ	1.92197	ATAC > CNV	De novo increase
chr5	56490903	56491327	0.0103882	0.000200178	mergeATAC_peak47217	3.04988	chr5:56	1.12822	.	1.92166	ATAC > CNV	De novo increase
chr8	142789519	142789854	0.00870846	0.000157214	mergeATAC_peak61431	5.12306	chr8:142	3.20182	.	1.92123	ATAC > CNV	De novo increase
chr20	53926534	53926926	0.00737113	0.000122869	mergeATAC_peak37081	3.46478	chr20:53	1.54604	.	1.91874	ATAC > CNV	De novo increase
chr8	120067783	120068437	4.31848e-05	1.61571e-07	mergeATAC_peak60579	3.63051	chr8:120	1.71206	.	1.91846	ATAC > CNV	De novo increase
chr8	144313584	144313931	0.000269196	1.52713e-06	mergeATAC_peak61565	4.7986	chr8:144	2.8808	HSF1	1.9178	ATAC > CNV	De novo increase
chr1	179591495	179591916	0.0348457	0.00144078	mergeATAC_peak4774	3.45172	chr1:179	1.5345	TDRD5	1.91722	ATAC > CNV	De novo increase
chr21	42593296	42593553	0.0470618	0.00244143	mergeATAC_peak38161	3.56116	chr21:42	1.64538	.	1.91579	ATAC > CNV	De novo increase
chr14	21557409	21557821	0.0274904	0.000948248	mergeATAC_peak17354	2.99769	chr14:21	1.08236	.	1.91532	ATAC > CNV	De novo increase
chr8	142634729	142634984	0.00231069	2.27024e-05	mergeATAC_peak61418	5.11144	chr8:142	3.20182	.	1.90962	ATAC > CNV	De novo increase
chr13	99198693	99198960	0.0363025	0.00153214	mergeATAC_peak16902	3.5043	chr13:99	1.5973	.	1.907	ATAC > CNV	De novo increase
chr21	36155561	36155783	0.0346044	0.00142363	mergeATAC_peak37861	3.37476	chr21:36	1.46781	CBR3-AS1;DOP1B	1.90695	ATAC > CNV	De novo increase
chr2	38409149	38409472	0.0212135	0.000600423	mergeATAC_peak31890	3.14396	chr2:38	1.23779	ENSG00000287313	1.90617	ATAC > CNV	De novo increase
chr21	39014663	39015121	0.00354265	4.23778e-05	mergeATAC_peak37993	3.33519	chr21:39	1.43214	.	1.90305	ATAC > CNV	De novo increase
chr1	153742352	153742855	0.0214189	0.000607865	mergeATAC_peak3818	3.68881	chr1:153	1.78626	.	1.90255	ATAC > CNV	De novo increase
chr16	15888532	15888999	0.0262265	0.000888697	mergeATAC_peak22028	2.97903	chr16:15	1.07678	CEP20	1.90225	ATAC > CNV	De novo increase
chr1	118111417	118111719	0.0359104	0.00150794	mergeATAC_peak3224	3.06081	chr1:118	1.16198	.	1.89883	ATAC > CNV	De novo increase
chr21	41774443	41775010	0.00193232	1.83484e-05	mergeATAC_peak38099	3.62358	chr21:41	1.72584	.	1.89774	ATAC > CNV	De novo increase
chr5	90873184	90873515	0.0465547	0.00216025	mergeATAC_peak47771	3.37569	chr5:90	1.47912	.	1.89657	ATAC > CNV	De novo increase
chr17	50372815	50373029	0.0326673	0.00120979	mergeATAC_peak25954	4.21604	chr17:50	2.32619	MRPL27;EME1	1.88985	ATAC > CNV	De novo increase
chr6	3377773	3378180	0.0368636	0.00156871	mergeATAC_peak49944	3.39771	chr6:3	1.51145	SLC22A23	1.88626	ATAC > CNV	De novo increase
chr20	57381861	57382074	0.0191847	0.00053337	mergeATAC_peak37147	3.44414	chr20:57	1.55855	.	1.88559	ATAC > CNV	De novo increase
chr6	1679666	1680165	0.00701685	0.000114936	mergeATAC_peak49870	3.19583	chr6:1	1.31033	.	1.8855	ATAC > CNV	De novo increase
chr21	36149901	36150145	0.0470618	0.0022019	mergeATAC_peak37859	3.35245	chr21:36	1.46781	CBR3-AS1	1.88464	ATAC > CNV	De novo increase
chr5	157477025	157477242	0.0410935	0.00177621	mergeATAC_peak49111	3.5398	chr5:157	1.65558	.	1.88421	ATAC > CNV	De novo increase
chr17	42366476	42366704	0.02526	0.000843653	mergeATAC_peak25461	3.73018	chr17:42	1.85005	.	1.88014	ATAC > CNV	De novo increase
chr9	110188977	110189384	0.00998376	0.000189639	mergeATAC_peak63504	2.98833	chr9:110	1.10931	.	1.87903	ATAC > CNV	De novo increase
chr2	102161423	102161786	0.0209813	0.000592892	mergeATAC_peak33173	3.08951	chr2:102	1.21107	.	1.87845	ATAC > CNV	De novo increase
chr5	36944737	36944916	0.0348457	0.00144256	mergeATAC_peak46877	3.10679	chr5:36	1.22985	.	1.87693	ATAC > CNV	De novo increase
chr1	161741549	161741781	0.000116861	5.3142e-07	mergeATAC_peak4294	4.6041	chr1:161	2.73056	.	1.87354	ATAC > CNV	De novo increase
chr16	12803543	12804103	0.0470618	0.00231662	mergeATAC_peak21945	3.15319	chr16:12	1.27969	CPPED1	1.8735	ATAC > CNV	De novo increase
chr19	57614031	57614433	0.0364456	0.00154126	mergeATAC_peak31080	3.54543	chr19:57	1.67364	ZNF134	1.87179	ATAC > CNV	De novo increase
chr17	38428110	38428469	0.0215784	0.000615015	mergeATAC_peak25177	3.00281	chr17:38	1.1319	ARHGAP23	1.87091	ATAC > CNV	De novo increase
chr7	137958725	137959060	0.0482506	0.00259485	mergeATAC_peak57661	3.1132	chr7:137	1.24277	.	1.87043	ATAC > CNV	De novo increase
chr1	225864363	225864797	0.00313996	3.53953e-05	mergeATAC_peak6142	3.44528	chr1:225	1.57633	.	1.86895	ATAC > CNV	De novo increase
chr16	53510513	53510710	0.027007	0.00092911	mergeATAC_peak22815	3.07762	chr16:53	1.20988	.	1.86774	ATAC > CNV	De novo increase
chr17	63629349	63630028	0.0160604	0.000385443	mergeATAC_peak26364	3.1882	chr17:63	1.32444	.	1.86376	ATAC > CNV	De novo increase
chr9	121972499	121973158	0.0438709	0.00191161	mergeATAC_peak63868	3.61824	chr9:121	1.76486	.	1.85338	ATAC > CNV	De novo increase
chr8	134886491	134886816	2.978e-14	2.71752e-18	mergeATAC_peak61160	8.3883	chr8:134	6.53886	.	1.84945	ATAC > CNV	De novo increase
chr8	133904317	133904838	0.0040898	5.20626e-05	mergeATAC_peak61109	8.04267	chr8:133	6.19438	.	1.84829	ATAC > CNV	De novo increase
chr17	78505097	78505717	0.0347007	0.00143276	mergeATAC_peak27018	3.37213	chr17:78	1.52407	.	1.84807	ATAC > CNV	De novo increase
chr17	40818745	40819243	0.0263774	0.00089702	mergeATAC_peak25368	3.72523	chr17:40	1.87943	KRT10-AS1	1.8458	ATAC > CNV	De novo increase
chr8	26474239	26474527	0.0206644	0.00058268	mergeATAC_peak58787	2.9302	chr8:26	1.08532	.	1.84487	ATAC > CNV	De novo increase
chr5	154702444	154702800	0.00931513	0.000173403	mergeATAC_peak49060	4.47092	chr5:154	2.6285	.	1.84242	ATAC > CNV	De novo increase
chr5	180809719	180809961	0.00076453	5.41733e-06	mergeATAC_peak49777	4.22338	chr5:180	2.38985	MGAT1;ENSG00000280161	1.83353	ATAC > CNV	De novo increase
chr1	205563710	205564248	0.00674026	0.00010815	mergeATAC_peak5463	3.57384	chr1:205	1.74122	.	1.83262	ATAC > CNV	De novo increase
chr16	17304491	17304919	0.0101057	0.000192889	mergeATAC_peak22052	3.54176	chr16:17	1.71228	.	1.82948	ATAC > CNV	De novo increase
chr1	150922563	150922739	0.0470618	0.00240361	mergeATAC_peak3634	4.49001	chr1:150	2.6685	.	1.82151	ATAC > CNV	De novo increase
chr16	13920036	13920425	0.0340579	0.00127475	mergeATAC_peak21950	3.85449	chr16:13	2.03898	ERCC4	1.81551	ATAC > CNV	De novo increase
chr7	73707261	73707580	0.00453505	6.00756e-05	mergeATAC_peak56066	3.00843	chr7:73	1.19393	.	1.8145	ATAC > CNV	De novo increase
chr21	42624269	42624709	0.0193944	0.000540971	mergeATAC_peak38165	3.45879	chr21:42	1.64538	.	1.81341	ATAC > CNV	De novo increase
chr8	100835550	100835798	4.71557e-05	1.78579e-07	mergeATAC_peak59995	9.47525	chr8:100	7.66417	.	1.81108	ATAC > CNV	De novo increase
chr1	111222928	111223179	0.0328649	0.00121863	mergeATAC_peak2964	3.50708	chr1:111	1.6994	.	1.80768	ATAC > CNV	De novo increase
chr5	180085062	180085530	0.00231795	2.28771e-05	mergeATAC_peak49751	4.19747	chr5:180	2.38985	.	1.80762	ATAC > CNV	De novo increase
chr16	48397246	48397763	0.00686262	0.00011074	mergeATAC_peak22673	3.74975	chr16:48	1.94716	.	1.80259	ATAC > CNV	De novo increase
chr7	117582453	117582744	0.0470618	0.00246055	mergeATAC_peak57275	3.39462	chr7:117	1.59715	.	1.79747	ATAC > CNV	De novo increase
chr21	31933740	31934122	0.0264804	0.000904951	mergeATAC_peak37702	3.55848	chr21:31	1.76107	.	1.79741	ATAC > CNV	De novo increase
chr1	149842816	149843638	8.78288e-06	2.47119e-08	mergeATAC_peak3562	3.36432	chr1:149	1.57364	H2AC18;ENSG00000290791;H2BC19P	1.79068	ATAC > CNV	De novo increase
chr7	106418114	106418393	0.0198972	0.000557718	mergeATAC_peak57049	3.5968	chr7:106	1.80679	.	1.79001	ATAC > CNV	De novo increase
chr8	141279140	141279377	0.00597974	9.16728e-05	mergeATAC_peak61370	5.86192	chr8:141	4.07364	ENSG00000254197	1.78828	ATAC > CNV	De novo increase
chr6	134621903	134622214	0.0200143	0.000561914	mergeATAC_peak53346	3.34215	chr6:134	1.55713	.	1.78502	ATAC > CNV	De novo increase
chr17	43670996	43671335	0.036121	0.00152173	mergeATAC_peak25575	3.20039	chr17:43	1.41583	.	1.78456	ATAC > CNV	De novo increase
chr7	25856852	25857318	0.00670648	0.000107478	mergeATAC_peak55127	2.93762	chr7:25	1.15577	.	1.78186	ATAC > CNV	De novo increase
chr1	108610210	108610536	0.0142841	0.000329561	mergeATAC_peak2814	3.38231	chr1:108	1.60047	.	1.78183	ATAC > CNV	De novo increase
chr20	63291299	63291517	0.045301	0.00209218	mergeATAC_peak37289	3.33831	chr20:63	1.56202	.	1.77629	ATAC > CNV	De novo increase
chr7	148983684	148983863	0.0196484	0.000548652	mergeATAC_peak57906	3.10098	chr7:148	1.32504	RNY3	1.77593	ATAC > CNV	De novo increase
chr16	1684570	1685061	0.0470618	0.002302	mergeATAC_peak21447	3.13067	chr16:1	1.35645	JPT2	1.77422	ATAC > CNV	De novo increase
chr1	155025137	155025525	0.0189518	0.000525189	mergeATAC_peak3909	4.10431	chr1:155	2.33204	.	1.77227	ATAC > CNV	De novo increase
chr8	139655219	139655481	0.0178618	0.000476488	mergeATAC_peak61279	5.44899	chr8:139	3.67788	KCNK9	1.77111	ATAC > CNV	De novo increase
chr1	209787446	209787952	0.0467604	0.00217406	mergeATAC_peak5681	3.01493	chr1:209	1.24862	.	1.76631	ATAC > CNV	De novo increase
chr1	212671748	212672002	0.0344199	0.00138655	mergeATAC_peak5796	3.45734	chr1:212	1.69107	.	1.76627	ATAC > CNV	De novo increase
chr1	160835059	160835271	0.0470618	0.00232994	mergeATAC_peak4201	3.88078	chr1:160	2.11608	.	1.7647	ATAC > CNV	De novo increase
chr6	89974831	89975105	0.0369778	0.00157525	mergeATAC_peak52489	3.20592	chr6:89	1.44211	.	1.76381	ATAC > CNV	De novo increase
chr6	36614996	36615411	0.0178618	0.000475652	mergeATAC_peak51250	3.29941	chr6:36	1.5405	.	1.75891	ATAC > CNV	De novo increase
chr8	142452806	142453176	0.0012919	1.06101e-05	mergeATAC_peak61409	4.95503	chr8:142	3.20182	.	1.7532	ATAC > CNV	De novo increase
chr7	1059907	1060114	0.0470618	0.0024368	mergeATAC_peak54455	2.99804	chr7:1	1.24522	ENSG00000257607	1.75282	ATAC > CNV	De novo increase
chr7	150373193	150373559	0.0172708	0.000448766	mergeATAC_peak57963	3.39765	chr7:150	1.6507	REPIN1-AS1	1.74695	ATAC > CNV	De novo increase
chr16	21509549	21509899	0.00424989	5.50054e-05	mergeATAC_peak22174	2.91862	chr16:21	1.17712	.	1.74151	ATAC > CNV	De novo increase
chr21	15722673	15723091	0.000599511	4.04835e-06	mergeATAC_peak37440	3.47159	chr21:15	1.73675	.	1.73484	ATAC > CNV	De novo increase
chr21	39863210	39863505	0.0475717	0.00253229	mergeATAC_peak38028	3.16623	chr21:39	1.43214	.	1.73409	ATAC > CNV	De novo increase
chr17	44344963	44345410	0.00454232	6.03792e-05	mergeATAC_peak25628	2.9206	chr17:44	1.18887	GRN	1.73173	ATAC > CNV	De novo increase
chr7	157253926	157254157	0.0367943	0.00156376	mergeATAC_peak58171	2.96203	chr7:157	1.23228	.	1.72975	ATAC > CNV	De novo increase
chr11	133958083	133958619	0.0346044	0.00142363	mergeATAC_peak12604	2.89174	chr11:133	1.16537	.	1.72637	ATAC > CNV	De novo increase
chr6	158857624	158857956	0.0232409	0.000689413	mergeATAC_peak54061	3.77323	chr6:158	2.04724	OSTCP1	1.72599	ATAC > CNV	De novo increase
chr13	97132102	97132316	0.0256885	0.000864155	mergeATAC_peak16827	3.35001	chr13:97	1.62411	.	1.7259	ATAC > CNV	De novo increase
chr8	144439507	144439700	0.01847	0.000503948	mergeATAC_peak61581	4.60374	chr8:144	2.8808	.	1.72294	ATAC > CNV	De novo increase
chr16	5065915	5066197	0.0470874	0.00248202	mergeATAC_peak21735	3.15765	chr16:5	1.43832	C16orf89	1.71933	ATAC > CNV	De novo increase
chr17	1067203	1067629	0.0127711	0.000280086	mergeATAC_peak23911	3.1874	chr17:1	1.4726	.	1.7148	ATAC > CNV	De novo increase
chr11	60756496	60757143	0.0308081	0.00107862	mergeATAC_peak10728	2.96052	chr11:60	1.24979	MS4A15	1.71073	ATAC > CNV	De novo increase
chr8	124781277	124781725	0.026278	0.000891639	mergeATAC_peak60756	4.21288	chr8:124	2.50338	.	1.7095	ATAC > CNV	De novo increase
chr9	122264517	122264959	0.0470618	0.00227455	mergeATAC_peak63885	3.5238	chr9:122	1.8175	MRRF;RBM18	1.70631	ATAC > CNV	De novo increase
chr1	246503286	246503854	0.00111406	8.82765e-06	mergeATAC_peak6743	3.39684	chr1:246	1.69078	.	1.70606	ATAC > CNV	De novo increase
chr6	134235970	134236476	0.036121	0.00152173	mergeATAC_peak53322	3.26145	chr6:134	1.55713	.	1.70433	ATAC > CNV	De novo increase
chr5	160887737	160888191	0.0185262	0.000505765	mergeATAC_peak49251	4.56751	chr5:160	2.86412	.	1.70339	ATAC > CNV	De novo increase
chr7	99312967	99313209	0.0480701	0.00257637	mergeATAC_peak56748	3.35135	chr7:99	1.64852	.	1.70282	ATAC > CNV	De novo increase
chr8	140615376	140615657	0.0344199	0.00139759	mergeATAC_peak61321	5.26409	chr8:140	3.56306	.	1.70103	ATAC > CNV	De novo increase
chr12	56493269	56493535	0.0470618	0.00242246	mergeATAC_peak14020	3.00074	chr12:56	1.30294	.	1.6978	ATAC > CNV	De novo increase
chr1	113401688	113402097	0.00884823	0.000160763	mergeATAC_peak3066	3.20033	chr1:113	1.50737	.	1.69296	ATAC > CNV	De novo increase
chr6	160386870	160387320	0.0144117	0.000333163	mergeATAC_peak54126	3.6951	chr6:160	2.00325	ENSG00000287656	1.69185	ATAC > CNV	De novo increase
chr16	17205629	17206083	0.0482506	0.00259485	mergeATAC_peak22050	3.40372	chr16:17	1.71228	.	1.69144	ATAC > CNV	De novo increase
chr8	127876048	127876336	0.00655865	0.000104239	mergeATAC_peak60902	5.48411	chr8:127	3.79706	.	1.68705	ATAC > CNV	De novo increase
chr1	229803817	229804573	0.00937656	0.000175117	mergeATAC_peak6314	3.0285	chr1:229	1.3457	.	1.6828	ATAC > CNV	De novo increase
chr13	108911965	108912227	0.00632164	9.88372e-05	mergeATAC_peak17070	2.82711	chr13:108	1.14962	.	1.67748	ATAC > CNV	De novo increase
chr7	141012135	141012391	0.0442552	0.00194691	mergeATAC_peak57774	2.97058	chr7:141	1.29339	.	1.6772	ATAC > CNV	De novo increase
chr7	129144524	129144889	0.0142973	0.000330084	mergeATAC_peak57486	2.91848	chr7:129	1.24405	TSPAN33	1.67443	ATAC > CNV	De novo increase
chr9	133486370	133486620	0.0385748	0.00165561	mergeATAC_peak64406	3.15279	chr9:133	1.47955	.	1.67324	ATAC > CNV	De novo increase
chr21	37839817	37840339	0.0381467	0.00163491	mergeATAC_peak37926	2.88258	chr21:37	1.21016	.	1.67242	ATAC > CNV	De novo increase
chr5	180090340	180090767	0.0191847	0.000533151	mergeATAC_peak49752	4.06161	chr5:180	2.38985	.	1.67176	ATAC > CNV	De novo increase
chr1	149850784	149851037	0.0238767	0.000711752	mergeATAC_peak3564	3.23886	chr1:149	1.57364	H2BC20P;ENSG00000290792;H2AC19	1.66522	ATAC > CNV	De novo increase
chr4	174629978	174630217	0.0470618	0.00243278	mergeATAC_peak46017	2.79038	chr4:174	1.1255	.	1.66488	ATAC > CNV	De novo increase
chr6	166775237	166775484	0.0139178	0.000317935	mergeATAC_peak54244	3.32314	chr6:166	1.66068	.	1.66246	ATAC > CNV	De novo increase
chr5	172479009	172479289	0.0264024	0.000898272	mergeATAC_peak49466	3.89231	chr5:172	2.23566	ENSG00000287814	1.65665	ATAC > CNV	De novo increase
chr16	19717957	19718366	0.015066	0.000351495	mergeATAC_peak22124	3.29382	chr16:19	1.63973	IQCK;KNOP1	1.65409	ATAC > CNV	De novo increase
chr8	101493842	101494290	2.55654e-07	4.16039e-10	mergeATAC_peak60040	6.83784	chr8:101	5.18747	.	1.65038	ATAC > CNV	De novo increase
chr9	121322350	121322743	0.00642384	0.000101021	mergeATAC_peak63838	3.41515	chr9:121	1.76486	.	1.65029	ATAC > CNV	De novo increase
chr8	143314880	143315112	0.0128498	0.000284157	mergeATAC_peak61464	4.88517	chr8:143	3.23947	TOP1MT	1.6457	ATAC > CNV	De novo increase
chr17	42472907	42473312	0.01873	0.000514748	mergeATAC_peak25476	3.49536	chr17:42	1.85005	.	1.64531	ATAC > CNV	De novo increase
chr8	104787885	104788120	0.00376615	4.54795e-05	mergeATAC_peak60193	5.90083	chr8:104	4.25877	.	1.64207	ATAC > CNV	De novo increase
chr8	142379351	142379537	0.0344199	0.00140871	mergeATAC_peak61405	4.84019	chr8:142	3.20182	.	1.63837	ATAC > CNV	De novo increase
chr5	162209076	162209274	0.0355577	0.0014861	mergeATAC_peak49269	4.71542	chr5:162	3.07887	.	1.63655	ATAC > CNV	De novo increase
chr17	57988338	57988854	0.0244133	0.000755863	mergeATAC_peak26169	3.20692	chr17:57	1.57139	ENSG00000280233;VEZF1	1.63553	ATAC > CNV	De novo increase
chr5	154692286	154692653	0.00550396	7.91888e-05	mergeATAC_peak49059	4.26196	chr5:154	2.6285	.	1.63347	ATAC > CNV	De novo increase
chr6	44313204	44313495	0.0249441	0.000825135	mergeATAC_peak51611	3.4525	chr6:44	1.81935	AARS2	1.63315	ATAC > CNV	De novo increase
chr1	180574721	180575036	0.0470618	0.00243266	mergeATAC_peak4808	3.04092	chr1:180	1.40823	.	1.63269	ATAC > CNV	De novo increase
chr6	166572301	166572677	0.0245077	0.000803545	mergeATAC_peak54229	3.28775	chr6:166	1.66068	.	1.62707	ATAC > CNV	De novo increase
chr1	212070798	212071007	0.0374105	0.0015983	mergeATAC_peak5765	3.31802	chr1:212	1.69107	.	1.62694	ATAC > CNV	De novo increase
chr5	150544760	150545037	0.0131883	0.0002966	mergeATAC_peak48921	3.79258	chr5:150	2.16571	.	1.62687	ATAC > CNV	De novo increase
chr17	59519938	59520551	0.00122762	9.9702e-06	mergeATAC_peak26229	2.9007	chr17:59	1.27411	.	1.62659	ATAC > CNV	De novo increase
chr17	50915174	50915645	0.00148576	1.26542e-05	mergeATAC_peak26006	3.94962	chr17:50	2.32619	.	1.62343	ATAC > CNV	De novo increase
chr1	180522188	180522481	0.0470618	0.00243266	mergeATAC_peak4803	3.0316	chr1:180	1.40823	.	1.62337	ATAC > CNV	De novo increase
chr21	28284167	28284526	0.041332	0.00178715	mergeATAC_peak37617	3.53772	chr21:28	1.91455	.	1.62318	ATAC > CNV	De novo increase
chr11	465846	466267	0.0444615	0.00196629	mergeATAC_peak9447	2.72004	chr11:0	1.09829	.	1.62175	ATAC > CNV	De novo increase
chr6	150507943	150508511	0.0199826	0.000560417	mergeATAC_peak53817	3.14091	chr6:150	1.5195	.	1.62141	ATAC > CNV	De novo increase
chr8	126301063	126301275	0.0470618	0.00239805	mergeATAC_peak60828	5.21077	chr8:126	3.59075	.	1.62002	ATAC > CNV	De novo increase
chr20	50711236	50711518	0.044831	0.00201361	mergeATAC_peak36978	4.04334	chr20:50	2.42544	.	1.6179	ATAC > CNV	De novo increase
chr1	155063579	155063837	0.0470874	0.00248575	mergeATAC_peak3918	3.9499	chr1:155	2.33204	EFNA4-EFNA3;EFNA4	1.61785	ATAC > CNV	De novo increase
chr8	122673541	122673787	0.0148684	0.000345654	mergeATAC_peak60641	3.28726	chr8:122	1.66942	.	1.61784	ATAC > CNV	De novo increase
chr21	44347968	44348575	0.0172708	0.000449411	mergeATAC_peak38253	2.94754	chr21:44	1.33215	ENSG00000260256	1.61539	ATAC > CNV	De novo increase
chr7	77454814	77455173	0.0127696	0.000279858	mergeATAC_peak56278	3.29539	chr7:77	1.68148	.	1.6139	ATAC > CNV	De novo increase
chr6	21381557	21381921	0.0470618	0.00239108	mergeATAC_peak50485	2.65207	chr6:21	1.04238	.	1.6097	ATAC > CNV	De novo increase
chr9	113232644	113233302	0.0470618	0.00225144	mergeATAC_peak63604	3.31804	chr9:113	1.70907	.	1.60897	ATAC > CNV	De novo increase
chr5	178280032	178280334	7.98347e-06	2.23274e-08	mergeATAC_peak49692	4.75975	chr5:178	3.15196	.	1.60778	ATAC > CNV	De novo increase
chr16	25015240	25015568	0.0455242	0.00210689	mergeATAC_peak22289	3.08492	chr16:25	1.47725	ENSG00000260714;ARHGAP17	1.60767	ATAC > CNV	De novo increase
chr6	167750952	167751405	0.00189029	1.76651e-05	mergeATAC_peak54272	2.99208	chr6:167	1.38444	ENSG00000289838	1.60764	ATAC > CNV	De novo increase
chr1	192476987	192477414	0.0170226	0.000417079	mergeATAC_peak5037	3.24501	chr1:192	1.63794	.	1.60708	ATAC > CNV	De novo increase
chr6	53927197	53927705	0.0127565	0.000279006	mergeATAC_peak51869	3.365	chr6:53	1.76154	.	1.60347	ATAC > CNV	De novo increase
chr19	36797163	36797856	0.00434129	5.64604e-05	mergeATAC_peak30035	3.26754	chr19:36	1.6655	ZNF790-AS1	1.60204	ATAC > CNV	De novo increase
chr1	206521215	206521566	0.00518048	7.33638e-05	mergeATAC_peak5523	3.26224	chr1:206	1.66368	.	1.59857	ATAC > CNV	De novo increase
chr17	2095005	2095279	0.0364456	0.00154261	mergeATAC_peak23998	3.08625	chr17:2	1.49131	SMG6	1.59494	ATAC > CNV	De novo increase
chr8	142624104	142624320	0.00445615	5.86916e-05	mergeATAC_peak61417	4.79607	chr8:142	3.20182	.	1.59425	ATAC > CNV	De novo increase
chr8	112150702	112150933	0.000360965	2.14654e-06	mergeATAC_peak60380	7.95342	chr8:112	6.36229	.	1.59113	ATAC > CNV	De novo increase
chr9	73148309	73148615	0.0470618	0.0024164	mergeATAC_peak62552	3.2991	chr9:73	1.70847	.	1.59063	ATAC > CNV	De novo increase
chr1	228500994	228501234	0.0470618	0.00220191	mergeATAC_peak6259	3.44355	chr1:228	1.85919	.	1.58436	ATAC > CNV	De novo increase
chr6	41592014	41592275	0.0470618	0.0023842	mergeATAC_peak51439	3.10075	chr6:41	1.5177	.	1.58304	ATAC > CNV	De novo increase
chr3	183533816	183534331	0.0306487	0.00106994	mergeATAC_peak42965	2.67244	chr3:183	1.08999	.	1.58245	ATAC > CNV	De novo increase
chr16	57284593	57284823	0.0378508	0.00162166	mergeATAC_peak22959	3.52846	chr16:57	1.94669	PLLP	1.58178	ATAC > CNV	De novo increase
chr7	129375220	129375381	0.0366008	0.00155252	mergeATAC_peak57497	2.82106	chr7:129	1.24405	ENSG00000286722;AHCYL2	1.57701	ATAC > CNV	De novo increase
chr8	102236650	102237107	1.35606e-05	3.95985e-08	mergeATAC_peak60089	6.25827	chr8:102	4.68451	.	1.57376	ATAC > CNV	De novo increase
chr19	48795180	48795732	0.0336561	0.00125708	mergeATAC_peak30739	2.80374	chr19:48	1.23016	.	1.57359	ATAC > CNV	De novo increase
chr9	76109888	76110288	0.0344199	0.00132915	mergeATAC_peak62609	2.90857	chr9:76	1.34564	.	1.56293	ATAC > CNV	De novo increase
chr19	34390431	34390742	0.0262879	0.000893174	mergeATAC_peak29924	2.84413	chr19:34	1.28252	.	1.56161	ATAC > CNV	De novo increase
chr20	54123455	54124175	0.00231823	2.31884e-05	mergeATAC_peak37092	2.61702	chr20:54	1.05804	.	1.55898	ATAC > CNV	De novo increase
chr8	127831526	127832034	7.0053e-05	2.80208e-07	mergeATAC_peak60898	5.34971	chr8:127	3.79706	.	1.55266	ATAC > CNV	De novo increase
chr13	95494158	95494393	0.03628	0.00153008	mergeATAC_peak16791	3.24677	chr13:95	1.69799	.	1.54878	ATAC > CNV	De novo increase
chr1	202184755	202184993	0.0470618	0.00243266	mergeATAC_peak5290	3.11449	chr1:202	1.56725	.	1.54725	ATAC > CNV	De novo increase
chr1	236997907	236998216	0.02673	0.000915922	mergeATAC_peak6563	3.15476	chr1:236	1.60998	.	1.54477	ATAC > CNV	De novo increase
chr12	6946450	6946740	0.00944276	0.000177076	mergeATAC_peak12835	3.19018	chr12:6	1.64844	PTPN6	1.54174	ATAC > CNV	De novo increase
chr1	224170729	224171107	0.0481513	0.0025835	mergeATAC_peak6077	2.95069	chr1:224	1.41159	.	1.5391	ATAC > CNV	De novo increase
chr7	83547588	83548065	0.0344199	0.00136238	mergeATAC_peak56395	2.81183	chr7:83	1.27446	.	1.53738	ATAC > CNV	De novo increase
chr6	41318784	41319132	0.0470618	0.00228745	mergeATAC_peak51419	3.05213	chr6:41	1.5177	.	1.53443	ATAC > CNV	De novo increase
chr9	122099355	122099596	0.0470618	0.00225136	mergeATAC_peak63875	3.35071	chr9:122	1.8175	.	1.53321	ATAC > CNV	De novo increase
chr6	167832806	167833145	0.01061	0.000205582	mergeATAC_peak54280	2.91362	chr6:167	1.38444	.	1.52918	ATAC > CNV	De novo increase
chr6	168007543	168008057	0.000515081	3.33721e-06	mergeATAC_peak54288	3.04699	chr6:168	1.5192	.	1.52779	ATAC > CNV	De novo increase
chr5	154640312	154640505	0.0470618	0.00246055	mergeATAC_peak49053	4.15416	chr5:154	2.6285	.	1.52566	ATAC > CNV	De novo increase
chr8	143508249	143508689	0.000122823	5.71609e-07	mergeATAC_peak61478	4.76384	chr8:143	3.23947	ZC3H3	1.52437	ATAC > CNV	De novo increase
chr5	172837456	172837968	0.000408437	2.51647e-06	mergeATAC_peak49491	3.75358	chr5:172	2.23566	.	1.51792	ATAC > CNV	De novo increase
chr9	113244055	113244489	0.0200143	0.000561914	mergeATAC_peak63605	3.22691	chr9:113	1.70907	.	1.51784	ATAC > CNV	De novo increase
chr8	101436993	101437377	9.55957e-08	1.35213e-10	mergeATAC_peak60029	6.70373	chr8:101	5.18747	.	1.51627	ATAC > CNV	De novo increase
[truncated: 1,513 more rows]
